# Supplementary material for: Global Reprogramming of Gene Transcription in Trichoderma reesei by Overexpressing an Artificial Transcription Factor for Improved Cellulase Production and Identification of Ypr1 as an Associated Regulator
Source: Front Bioeng Biotechnol. 2020 Jul 3;8:649. doi: 10.3389/fbioe.2020.00649 (PMC7351519; doi:10.3389/fbioe.2020.00649)
Supplement: Supplementary file 2 [file Table_2.XLSX]

## Sheet: Putative regulated genes
Epxression profile of genes putative regulated by AZFP-U5
Gene ID	Model ID	Length	log2 (U5/C30) 24 h	log2 (U5/C30) 48 h	Description	Function	KOG
97158	estExt_Genewise1Plus.C_4_t30076	1541	1.52356	1.29768	ER-Golgi vesicle-tethering protein p115	Intracellular trafficking, secretion, and vesicular transport	CELLULAR PROCESSES AND SIGNALING
138712	estExt_fgenesh1_pm.C_220058	1055	0.819826	-0.174574	Cysteine proteinases	Posttranslational modification, protein turnover, chaperones	CELLULAR PROCESSES AND SIGNALING
32716	fgenesh1_pg.2_#_244	3018	0.634122	-0.250808	Microtubule-associated protein	Cytoskeleton	CELLULAR PROCESSES AND SIGNALING
97934	estExt_Genewise1Plus.C_6_t20251	3428	-0.0156419	-0.110362	Peptidase	Posttranslational modification, protein turnover, chaperones	CELLULAR PROCESSES AND SIGNALING
44450	gw1.3.263.1	492	-0.0419925	2.85612	unknown	Cell wall/membrane/envelope biogenesis	CELLULAR PROCESSES AND SIGNALING
130089	fgenesh1_pm.9_#_35	1311	-0.888117	0.253186	Beta-ketoacyl synthase	Defense mechanisms	CELLULAR PROCESSES AND SIGNALING
85186	e_gw1.17.437.1	234	-	-	Predicted glutathione S-transferase	Posttranslational modification, protein turnover, chaperones	CELLULAR PROCESSES AND SIGNALING
70731	e_gw1.2.1971.1	2574	1.01116	0.519501	GTPase activity	Function unknown	CELLULAR PROCESSES AND SIGNALING
8947	gm1.4503_g	2568	0.565597	-0.282657	Lactamase	putative tRNA processing endoribonuclease Trz1	CELLULAR PROCESSES AND SIGNALING
61727	gw1.30.290.1	615	0.454274	-0.459024	Magnesium-dependent phosphatase	Function unknown	CELLULAR PROCESSES AND SIGNALING
87182	e_gw1.20.97.1	2985	-0.0283903	0.279504	WD40 repeat	UBP9-binding protein bun107	CELLULAR PROCESSES AND SIGNALING
129764	fgenesh1_pm.8_#_7	1338	2.14339	0.819677	Signal transduction histidine kinase	Signal transduction mechanisms	CELLULAR PROCESSES AND SIGNALING
104757	estExt_Genewise1Plus.C_370074	4824	1.30249	0.27017	transcription factor	Signal transduction mechanisms	CELLULAR PROCESSES AND SIGNALING
93459	e_gw1.53.14.1	3240	0.50696	0.181052	Protein kinase	Signal transduction mechanisms	CELLULAR PROCESSES AND SIGNALING
127164	fgenesh1_pm.2_#_489	2532	-0.632382	-0.556153	Leucine-rich repeat	Signal transduction mechanisms	CELLULAR PROCESSES AND SIGNALING
5710	gm1.1266_g	789	1.0747	0.666474	Plant basic secretory protein	Extracellular Protein	Extracellular Protein
25095	estExt_Genemark1.C_100013	2708	-0.614961	-0.961769	Glycoside hydrolase 3	Extracellular Protein	Extracellular Protein
123709	estExt_fgenesh2_kg.C_110122	1222	-3.11091	-1.91779	beta-xylosidase	Extracellular Protein	Extracellular Protein
48020	gw1.4.390.1	765	-	-	Killer toxin	Extracellular Protein	Extracellular Protein
124902	estExt_fgenesh2_kg.C_250078	733	8.91748	0.62191	unknown	Function unknown	Function unknown
81627	e_gw1.11.741.1	555	2.9386	-0.942285	unknown	Function unknown	Function unknown
89220	e_gw1.25.195.1	291	2.34241	0.213471	unknown	Function unknown	Function unknown
138668	estExt_fgenesh1_pm.C_210124	1438	1.6878	0.78179	unknown	Function unknown	Function unknown
131189	fgenesh1_pm.12_#_231	1410	0.523695	0.725457	ARCA-like protein	Function unknown	Function unknown
124000	estExt_fgenesh2_kg.C_140048	590	0.282035	0.729352	unknown	Function unknown	Function unknown
9684	gm1.5240_g	654	0.23078	1.09422	unknown	Function unknown	Function unknown
59720	gw1.26.293.1	606	-0.432111	1.87149	unknown	Function unknown	Function unknown
6561	gm1.2117_g	576	-0.858088	-2.52227	F-box proteins	Function unknown	Function unknown
94464	estExt_Genewise1Plus.C_1_t40099	1613	-2.31946	0.736966	unknown	Function unknown	Function unknown
123710	estExt_fgenesh2_kg.C_110123	607	-3.00406	-1.85432	unknown	Function unknown	Function unknown
10896	gm1.6452_g	567	-	-	unknown	Function unknown	Function unknown
132444	fgenesh1_pm.18_#_101	372	-	-	unknown	Function unknown	Function unknown
141321	estExt_fgenesh1_pg.C_80173	1320	0.796063	-0.568429	RNA processing and modification	RNA processing and modification	INFORMATION STORAGE AND PROCESSING
104068	estExt_Genewise1Plus.C_290012	2026	0.604719	-0.631034	DNA/RNA helicase	RNA processing and modification	INFORMATION STORAGE AND PROCESSING
38417	fgenesh1_pg.24_#_1	1428	3.04439	6.16993	Transferase family	transferase activity, transferring acyl groups other than amino-acyl groups	METABOLISM
68521	e_gw1.1.907.1	900	4.72273	-3.76896	NAD(P)-binding protein	Secondary metabolites biosynthesis, transport and catabolism	METABOLISM
69114	e_gw1.1.2535.1	1077	11.973	-4.37532	Alcohol dehydrogenase	Secondary metabolites biosynthesis, transport and catabolism	METABOLISM
85306	e_gw1.17.188.1	1263	5.64386	1.40781	Major facilitator superfamily	Carbohydrate transport and metabolism	METABOLISM
35812	fgenesh1_pg.10_#_41	852	2.58263	1.90397	putative flavoprotein oxygenase	Secondary metabolites biosynthesis, transport and catabolism	METABOLISM
46274	gw1.45.26.1	930	1.85055	0.326341	NADH-ubiquinone oxidoreductase	Energy production and conversion	METABOLISM
33545	fgenesh1_pg.3_#_423	837	1.22651	0.220729	Mitotic spindle checkpoint protein	Cell cycle control, cell division, chromosome partitioning	METABOLISM
136321	estExt_fgenesh1_pm.C_3_t20025	2601	0.88	0.172837	Adenosine/AMP deaminase	Nucleotide transport and metabolism	METABOLISM
7743	gm1.3299_g	2667	0.632652	0.219593	Terpenoid synthase	Cell cycle control, cell division, chromosome partitioning	METABOLISM
106991	estExt_Genewise1.C_2_t20162	1725	0.380104	-1.59621	Alcohol dehydrogenase	Secondary metabolites biosynthesis, transport and catabolism	METABOLISM
98807	estExt_Genewise1Plus.C_8_t10193	698	0.336633	0.893963	Glycolipid transfer protein	Carbohydrate transport and metabolism	METABOLISM
101318	estExt_Genewise1Plus.C_15_t10070	1518	-0.527746	-1.05753	Fumarate lyase	Amino acid transport and metabolism	METABOLISM
98803	estExt_Genewise1Plus.C_8_t10189	2653	-1.55591	-0.711754	Phospholipase	Lipid transport and metabolism	METABOLISM
