# Supplementary material for: Global Reprogramming of Gene Transcription in Trichoderma reesei by Overexpressing an Artificial Transcription Factor for Improved Cellulase Production and Identification of Ypr1 as an Associated Regulator
Source: Front Bioeng Biotechnol. 2020 Jul 3;8:649. doi: 10.3389/fbioe.2020.00649 (PMC7351519; doi:10.3389/fbioe.2020.00649)
Supplement: Supplementary file 3 [file Table_3.XLSX]

## Sheet: 24h
Differentially Expressed Genes (DEGs) between T. reesei U5 and Rut-C30 (24 h)
GeneID	Model Name	Description	Length	log2 Ratio (U5/C30) 24 h	Up-Down-Regulation(U2h3/C2h1)	P-value	cog	cog_description	pfam	swissprot
88601	e_gw1.24.232.1	NAD(P)-binding protein	747	14.9626	Up	1.05051e-57	ENOG4111VKY(S:Function unknown)	ENOG4111VKY(-)	PF00106.25(adh_short:short chain dehydrogenase); PF13561.6(adh_short_C2:Enoyl-(Acyl carrier protein) reductase); PF08659.10(KR:KR domain); PF01370.21(Epimerase:NAD dependent epimerase/dehydratase family)	sp|Q00278|AFLD_ASPPU(Norsolorinic acid ketoreductase OS=Aspergillus parasiticus (strain ATCC 56775 / NRRL 5862 / SRRC 143 / SU-1) OX=1403190 GN=aflD PE=1 SV=1)
63329	gw1.30.309.1	hypothetical protein	162	14.2776	Up	4.911e-06	ENOG410ZBMS(S:Function unknown); COG0402(F:Nucleotide transport and metabolism)	ENOG410ZBMS(-); COG0402(deaminase)
93518	e_gw1.54.6.1	putative short-chain dehydrogenases/reductase	717	14.1768	Up	2.5906e-32	ENOG41127H5(S:Function unknown)	ENOG41127H5(-)	PF00106.25(adh_short:short chain dehydrogenase); PF13561.6(adh_short_C2:Enoyl-(Acyl carrier protein) reductase); PF13460.6(NAD_binding_10:NAD(P)H-binding); PF05368.13(NmrA:NmrA-like family); PF08659.10(KR:KR domain)
87018	e_gw1.20.190.1	NAD(P)-binding protein	741	13.3826	Up	1.28647e-19	COG1028(M:Cell wall/membrane/envelope biogenesis)	COG1028(YD repeat protein)	PF00106.25(adh_short:short chain dehydrogenase); PF13561.6(adh_short_C2:Enoyl-(Acyl carrier protein) reductase); PF08659.10(KR:KR domain)	sp|P14802|YOXD_BACSU(Uncharacterized oxidoreductase YoxD OS=Bacillus subtilis (strain 168) OX=224308 GN=yoxD PE=3 SV=2)
135149	fgenesh1_pm.52_#_15	hypothetical protein	990	13.1596	Up	7.27088e-23	COG0435(O:Posttranslational modification, protein turnover, chaperones)	COG0435(glutathione Stransferase)	PF13409.6(GST_N_2:Glutathione S-transferase, N-terminal domain); PF13410.6(GST_C_2:Glutathione S-transferase, C-terminal domain); PF00043.25(GST_C:Glutathione S-transferase, C-terminal domain); PF14497.6(GST_C_3:Glutathione S-transferase, C-terminal domain); PF13417.6(GST_N_3:Glutathione S-transferase, N-terminal domain)	sp|O94524|GTO2_SCHPO(Glutathione S-transferase omega-like 2 OS=Schizosaccharomyces pombe (strain 972 / ATCC 24843) OX=284812 GN=gto2 PE=3 SV=1)
84204	e_gw1.15.30.1	expressed protein	237	12.9218	Up	0.000290204	ENOG41118U0(S:Function unknown)	ENOG41118U0(-)
85303	e_gw1.17.317.1	arylamine N-acetyltransferase 1	918	12.8553	Up	2.96106e-17	COG2162(Q:Secondary metabolites biosynthesis, transport and catabolism)	COG2162(N-acetyltransferase)	PF00797.17(Acetyltransf_2:N-acetyltransferase)	sp|P18605|ARY1_RABIT(Arylamine N-acetyltransferase 1 OS=Oryctolagus cuniculus OX=9986 GN=NAT1 PE=3 SV=1)
34063	fgenesh1_pg.5_#_2	Nitroreductase	636	12.7142	Up	9.26992e-11	COG3560(S:Function unknown)	COG3560(Nitroreductase)	PF00881.24(Nitroreductase:Nitroreductase family)	sp|Q96VH4|HBN1_YEAST(Putative nitroreductase HBN1 OS=Saccharomyces cerevisiae (strain ATCC 204508 / S288c) OX=559292 GN=HBN1 PE=1 SV=1)
84653	e_gw1.16.204.1	stress responsive A/B barrel domain-containing protein	330	12.6348	Up	3.77518e-05	ENOG4111VFK(I:Lipid transport and metabolism)	ENOG4111VFK(Acyltransferase)	PF07876.12(Dabb:Stress responsive A/B Barrel Domain)
120163	fgenesh2_kg.19_#_21_#_gi|38356500|gb|BM076990.2|BM076990	expressed protein	600	12.577	Up	2.77558e-09	ENOG410YBVP(S:Function unknown)	ENOG410YBVP(STYKc)
48094	gw1.6.409.1	hypothetical protein	306	12.5627	Up	0.000147044	ENOG41123ER(S:Function unknown)	ENOG41123ER(Chromosome 1 open reading frame 35)	PF10159.9(MMtag:Multiple myeloma tumor-associated)	sp|Q9BU76|MMTA2_HUMAN(Multiple myeloma tumor-associated protein 2 OS=Homo sapiens OX=9606 GN=MMTAG2 PE=1 SV=1)
26117	estExt_Genemark1.C_190168	UDP-Glycosyltransferase/glycogen phosphorylase	2610	12.4041	Up	9.65078e-37	COG1819(S:Function unknown)	COG1819(Fungal specific transcription factor domain)	PF03033.20(Glyco_transf_28:Glycosyltransferase family 28 N-terminal domain); PF00201.18(UDPGT:UDP-glucoronosyl and UDP-glucosyl transferase)	sp|Q9M8Z7|U80A2_ARATH(Sterol 3-beta-glucosyltransferase UGT80A2 OS=Arabidopsis thaliana OX=3702 GN=UGT80A2 PE=1 SV=1)
34612	fgenesh1_pg.6_#_187	reductase	1026	12.3987	Up	2.65464e-14	COG0451(S:Function unknown)	COG0451(FAD binding domain)	PF01370.21(Epimerase:NAD dependent epimerase/dehydratase family); PF01073.19(3Beta_HSD:3-beta hydroxysteroid dehydrogenase/isomerase family); PF13460.6(NAD_binding_10:NAD(P)H-binding)	sp|A0ST44|CTB6_CERNC(Ketoreductase CTB6 OS=Cercospora nicotianae OX=29003 GN=CTB6 PE=2 SV=1)
86496	e_gw1.19.419.1	putative short-chain alcohol dehydrogenase	705	12.3691	Up	1.40637e-09	ENOG4111ZN2(S:Function unknown)	ENOG4111ZN2(Dehydrogenase)	PF00106.25(adh_short:short chain dehydrogenase); PF13561.6(adh_short_C2:Enoyl-(Acyl carrier protein) reductase); PF08659.10(KR:KR domain)
134184	fgenesh1_pm.30_#_21	TauD-domain containing protein	1167	12.3219	Up	1.74978e-15	COG2175(Q:Secondary metabolites biosynthesis, transport and catabolism)	COG2175(Cytochrome p450)	PF02668.16(TauD:Taurine catabolism dioxygenase TauD, TfdA family)	sp|A0A0A2J5V5|CNSM_PENEN(Alpha-ketoglutarate-dependent dioxygenase cnsM OS=Penicillium expansum OX=27334 GN=cnsM PE=3 SV=1)
52809	gw1.21.205.1	hypothetical protein	789	12.1923	Up	1.40637e-09	ENOG410YIY0(S:Function unknown)	ENOG410YIY0(-)
120050	fgenesh2_kg.17_#_44_#_gi|38356682|gb|BM077127.2|BM077127	expressed protein	372	12.1033	Up	0.000290204
69114	e_gw1.1.2535.1	alcohol dehydrogenase	1077	11.973	Up	2.37994e-11	COG1064(Q:Secondary metabolites biosynthesis, transport and catabolism)	COG1064(depolymerase)	PF08240.12(ADH_N:Alcohol dehydrogenase GroES-like domain); PF00107.26(ADH_zinc_N:Zinc-binding dehydrogenase); PF13602.6(ADH_zinc_N_2:Zinc-binding dehydrogenase)	sp|P54202|ADH2_EMENI(Alcohol dehydrogenase 2 OS=Emericella nidulans (strain FGSC A4 / ATCC 38163 / CBS 112.46 / NRRL 194 / M139) OX=227321 GN=alcB PE=3 SV=2)
32116	fgenesh1_pg.1_#_605	FMN-linked oxidoreductase	1236	11.9476	Up	7.9485e-13	COG1902(C:Energy production and conversion)	COG1902(NADH flavin oxidoreductase, NADH oxidase)	PF00724.20(Oxidored_FMN:NADH:flavin oxidoreductase / NADH oxidase family); PF01207.17(Dus:Dihydrouridine synthase (Dus))	sp|Q6UEF0|NADA_ASPPU(NADH-dependent flavin oxidoreductase nadA OS=Aspergillus parasiticus (strain ATCC 56775 / NRRL 5862 / SRRC 143 / SU-1) OX=1403190 GN=nadA PE=2 SV=1)
32112	fgenesh1_pg.1_#_601	TauD-domain containing protein	1101	11.8138	Up	1.8295e-10	COG2175(S:Function unknown)	COG2175(Conserved hypothetical, protein)	PF02668.16(TauD:Taurine catabolism dioxygenase TauD, TfdA family)	sp|Q12358|JLP1_YEAST(Alpha-ketoglutarate-dependent sulfonate dioxygenase OS=Saccharomyces cerevisiae (strain ATCC 204508 / S288c) OX=559292 GN=JLP1 PE=1 SV=1)
93160	e_gw1.47.20.1	hypothetical protein	2085	11.7607	Up	5.01086e-19	ENOG4111A4X(S:Function unknown)	ENOG4111A4X(GAL4)	PF00172.18(Zn_clus:Fungal Zn(2)-Cys(6) binuclear cluster domain)	sp|A0A1B4XBH9|SDNS_SORAA(Transcription factor sdnS OS=Sordaria araneosa OX=573841 GN=sdnS PE=3 SV=1)
77049	e_gw1.6.315.1	hypothetical protein	2244	11.7607	Up	1.67353e-20	ENOG410YAP5(S:Function unknown)	ENOG410YAP5(Fungal specific transcription factor domain)	PF04082.18(Fungal_trans:Fungal specific transcription factor domain); PF00172.18(Zn_clus:Fungal Zn(2)-Cys(6) binuclear cluster domain)	sp|B8N0F0|ASAR_ASPFN(C6 transcription factor asaR OS=Aspergillus flavus (strain ATCC 200026 / FGSC A1120 / NRRL 3357 / JCM 12722 / SRRC 167) OX=332952 GN=asaR PE=2 SV=1)
34599	fgenesh1_pg.6_#_174	Nitrilotriacetate monooxygenase component A/pristinamycin IIA synthase subunit A	1434	11.7228	Up	7.9485e-13	COG2141(C:Energy production and conversion)	COG2141(Monooxygenase)	PF00296.20(Bac_luciferase:Luciferase-like monooxygenase)	sp|E9JFX9|DMOA_HYPSL(Dimethyl-sulfide monooxygenase OS=Hyphomicrobium sulfonivorans OX=121290 GN=dmoA PE=1 SV=1)
134240	fgenesh1_pm.30_#_77	Phenylacrylic acid decarboxylase	546	11.4564	Up	0.000290204	COG0163(H:Coenzyme transport and metabolism)	COG0163(carboxy-lyase activity)	PF02441.19(Flavoprotein:Flavoprotein)	sp|P33751|PAD1_YEAST(Flavin prenyltransferase PAD1, mitochondrial OS=Saccharomyces cerevisiae (strain ATCC 204508 / S288c) OX=559292 GN=PAD1 PE=1 SV=2)
68610	e_gw1.1.1396.1	putative hydrolase	957	11.3772	Up	6.38854e-07	COG0596(S:Function unknown); ENOG410XPRR(S:Function unknown)	COG0596(-); ENOG410XPRR(Alpha Beta Hydrolase Fold protein)	PF00561.20(Abhydrolase_1:alpha/beta hydrolase fold); PF12697.7(Abhydrolase_6:Alpha/beta hydrolase family)	sp|Q6NAM1|DEHA_RHOPA(Fluoroacetate dehalogenase OS=Rhodopseudomonas palustris (strain ATCC BAA-98 / CGA009) OX=258594 GN=RPA1163 PE=1 SV=1)
6579	gm1.2135_g	reductase	1053	11.2935	Up	3.23702e-07	COG0451(M:Cell wall/membrane/envelope biogenesis)	COG0451(Nad-dependent epimerase dehydratase)	PF01370.21(Epimerase:NAD dependent epimerase/dehydratase family); PF13460.6(NAD_binding_10:NAD(P)H-binding); PF16363.5(GDP_Man_Dehyd:GDP-mannose 4,6 dehydratase); PF01073.19(3Beta_HSD:3-beta hydroxysteroid dehydrogenase/isomerase family)	sp|A0ST44|CTB6_CERNC(Ketoreductase CTB6 OS=Cercospora nicotianae OX=29003 GN=CTB6 PE=2 SV=1)
75729	e_gw1.5.684.1	NAD(P)-binding protein	1035	11.1098	Up	2.48836e-06	COG0604(U:Intracellular trafficking, secretion, and vesicular transport)	COG0604(MFS transporter of unkown specificity)	PF00107.26(ADH_zinc_N:Zinc-binding dehydrogenase); PF13602.6(ADH_zinc_N_2:Zinc-binding dehydrogenase); PF08240.12(ADH_N:Alcohol dehydrogenase GroES-like domain); PF00208.21(ELFV_dehydrog:Glutamate/Leucine/Phenylalanine/Valine dehydrogenase)	sp|O94564|YGD6_SCHPO(Zinc-type alcohol dehydrogenase-like protein C1773.06c OS=Schizosaccharomyces pombe (strain 972 / ATCC 24843) OX=284812 GN=SPBC1773.06c PE=3 SV=1)
76497	e_gw1.6.66.1	MFS general substrate transporter	1290	10.8455	Up	1.26083e-06	COG0477(S:Function unknown); ENOG410YB5Q(G:Carbohydrate transport and metabolism); ENOG410YB78(S:Function unknown)	COG0477(Transcription factor); ENOG410YB5Q(Major Facilitator Superfamily); ENOG410YB78(Major Facilitator Superfamily)	PF07690.16(MFS_1:Major Facilitator Superfamily)	sp|Q5ATG7|APDF_EMENI(Aspyridones efflux protein apdF OS=Emericella nidulans (strain FGSC A4 / ATCC 38163 / CBS 112.46 / NRRL 194 / M139) OX=227321 GN=apdF PE=2 SV=1)
103255	estExt_Genewise1Plus.C_230222	glucanase B	1454	10.7398	Up	6.38854e-07	ENOG41117B1(S:Function unknown)	ENOG41117B1(hydrolase)	PF16483.5(Glyco_hydro_64:Beta-1,3-glucanase)
132198	fgenesh1_pm.17_#_66	putative short-chain dehydrogenase/reductase family protein	1044	10.5507	Up	0.000147044	COG1028(S:Function unknown)	COG1028(-)	PF00106.25(adh_short:short chain dehydrogenase); PF13561.6(adh_short_C2:Enoyl-(Acyl carrier protein) reductase); PF08659.10(KR:KR domain)	sp|B8M9L2|TROPG_TALSN(Short-chain dehydrogenase/reductase tropG OS=Talaromyces stipitatus (strain ATCC 10500 / CBS 375.48 / QM 6759 / NRRL 1006) OX=441959 GN=tropG PE=3 SV=1)
139626	estExt_fgenesh1_pg.C_1_t10116	FAD/NAD(P)-binding domain-containing protein	1448	10.4262	Up	0	COG0604(T:Signal transduction mechanisms); ENOG41124FP(S:Function unknown)	COG0604(protein serine/threonine kinase activity); ENOG41124FP(FAD binding domain)	PF01494.19(FAD_binding_3:FAD binding domain); PF13450.6(NAD_binding_8:NAD(P)-binding Rossmann-like domain); PF01266.24(DAO:FAD dependent oxidoreductase)	sp|G0R6T0|SORC_HYPJQ(FAD-dependent monooxygenase sor5 OS=Hypocrea jecorina (strain QM6a) OX=431241 GN=sor5 PE=2 SV=1)
91228	e_gw1.31.223.1	hypothetical protein	1455	10.3443	Up	1.91285e-05	ENOG410YB9A(S:Function unknown); ENOG410YJ37(S:Function unknown)	ENOG410YB9A(Fungal Zn(2)-Cys(6) binuclear cluster domain); ENOG410YJ37(Fungal specific transcription factor domain)	PF00172.18(Zn_clus:Fungal Zn(2)-Cys(6) binuclear cluster domain)	sp|A6SSW6|BOA15_BOTFB(Transcription factor BOA15 OS=Botryotinia fuckeliana (strain B05.10) OX=332648 GN=BOA15 PE=4 SV=1)
102278	estExt_Genewise1Plus.C_18_t10484	NAD(P)-binding protein	945	10.0404	Up	0	ENOG4111IQ0(S:Function unknown)	ENOG4111IQ0(Dehydrogenase)	PF13561.6(adh_short_C2:Enoyl-(Acyl carrier protein) reductase); PF00106.25(adh_short:short chain dehydrogenase); PF08659.10(KR:KR domain)	sp|S0DRI2|FSR5_GIBF5(Short-chain dehydrogenase/reductase fsr5 OS=Gibberella fujikuroi (strain CBS 195.34 / IMI 58289 / NRRL A-6831) OX=1279085 GN=fsr5 PE=2 SV=1)
143101	estExt_fgenesh1_pg.C_320017	putative aldehyde reductase	991	10.0142	Up	0	COG0667(S:Function unknown)	COG0667(finger domain protein)	PF00248.21(Aldo_ket_red:Aldo/keto reductase family)	sp|Q6Q875|SIRO_LEPMC(Oxidoreductase sirO OS=Leptosphaeria maculans OX=5022 GN=sirO PE=3 SV=1)
121436	estExt_fgenesh2_kg.C_1_t10045	MFS general substrate transporter	1739	9.97439	Up	0	COG0477(S:Function unknown)	COG0477(FAD binding domain)	PF07690.16(MFS_1:Major Facilitator Superfamily); PF00083.24(Sugar_tr:Sugar (and other) transporter)	sp|G0R6T1|SORT_HYPJQ(Major facilitator-type transporter sor6 OS=Hypocrea jecorina (strain QM6a) OX=431241 GN=sor6 PE=2 SV=1)
93847	estExt_Genewise1Plus.C_1_t10359	hypothetical protein	7952	9.76526	Up	0	COG3321(T:Signal transduction mechanisms)	COG3321(protein serine/threonine kinase activity)	PF00109.26(ketoacyl-synt:Beta-ketoacyl synthase, N-terminal domain); PF02801.22(Ketoacyl-synt_C:Beta-ketoacyl synthase, C-terminal domain); PF18558.1(HTH_51:Helix-turn-helix domain); PF00698.21(Acyl_transf_1:Acyl transferase domain); PF07993.12(NAD_binding_4:Male sterility protein); PF16073.5(SAT:Starter unit:ACP transacylase in aflatoxin biosynthesis); PF08242.12(Methyltransf_12:Methyltransferas…	sp|G0R6S9|SORB_HYPJQ(Non-reducing polyketide synthase sor2 OS=Hypocrea jecorina (strain QM6a) OX=431241 GN=sor2 PE=2 SV=1)
71724	e_gw1.2.1635.1	hypothetical protein	1617	9.76487	Up	0.000290204	ENOG410XRB5(S:Function unknown)	ENOG410XRB5(RNA binding motif, single stranded interacting protein)	PF00076.22(RRM_1:RNA recognition motif. (a.k.a. RRM, RBD, or RNP domain))	sp|Q2L4W6|SPO5_SCHPO(Sporulation-specific protein 5 OS=Schizosaccharomyces pombe (strain 972 / ATCC 24843) OX=284812 GN=spo5 PE=1 SV=1)
124902	estExt_fgenesh2_kg.C_250078	hypothetical protein	733	8.91748	Up	0	COG3812(S:Function unknown)	COG3812(Domain of unknown function (DUF1993))	PF09351.10(DUF1993:Domain of unknown function (DUF1993))
91083	e_gw1.31.98.1	Nitrilotriacetate monooxygenase component A/pristinamycin IIA synthase subunit A	1344	8.80879	Up	2.69006e-133	ENOG410XNPZ(S:Function unknown)	ENOG410XNPZ(monooxygenase)	PF00296.20(Bac_luciferase:Luciferase-like monooxygenase)	sp|P54989|NTAA_AMIAI(Nitrilotriacetate monooxygenase component A OS=Aminobacter aminovorans OX=83263 GN=ntaA PE=1 SV=2)
95040	estExt_Genewise1Plus.C_1_t60364	putative glutathione S-transferase	739	8.66961	Up	5.66392e-240	ENOG4111PE4(S:Function unknown); ENOG41118I6(S:Function unknown)	ENOG4111PE4(glutathione Stransferase); ENOG41118I6(-)	PF13417.6(GST_N_3:Glutathione S-transferase, N-terminal domain); PF13409.6(GST_N_2:Glutathione S-transferase, N-terminal domain); PF13410.6(GST_C_2:Glutathione S-transferase, C-terminal domain); PF14497.6(GST_C_3:Glutathione S-transferase, C-terminal domain); PF16865.5(GST_C_5:Glutathione S-transferase, C-terminal domain); PF00043.25(GST_C:Glutathione S-transferase, C-terminal domain)	sp|B8NM79|USTS_ASPFN(Glutathione S-transferase-like protein ustS OS=Aspergillus flavus (strain ATCC 200026 / FGSC A1120 / NRRL 3357 / JCM 12722 / SRRC 167) OX=332952 GN=ustS PE=1 SV=2)
92641	e_gw1.41.8.1	putative short-chain dehydrogenases/reductase	765	8.47819	Up	1.92778e-211	COG1028(I:Lipid transport and metabolism)	COG1028(phospholipase A2 group)	PF13561.6(adh_short_C2:Enoyl-(Acyl carrier protein) reductase); PF00106.25(adh_short:short chain dehydrogenase); PF08659.10(KR:KR domain)	sp|P51831|FABG_BACSU(3-oxoacyl-[acyl-carrier-protein] reductase FabG OS=Bacillus subtilis (strain 168) OX=224308 GN=fabG PE=3 SV=3)
26756	estExt_Genemark1.C_320001	Aldo/keto reductase	1023	7.92255	Up	0	COG0667(S:Function unknown)	COG0667(Ankyrin Repeat Protein)	PF00248.21(Aldo_ket_red:Aldo/keto reductase family)	sp|Q6Q875|SIRO_LEPMC(Oxidoreductase sirO OS=Leptosphaeria maculans OX=5022 GN=sirO PE=3 SV=1)
93844	estExt_Genewise1Plus.C_1_t10356	beta-ketoacyl synthase domain-containing protein	7743	7.91442	Up	0	ENOG410XNPJ(T:Signal transduction mechanisms); COG3321(T:Signal transduction mechanisms)	ENOG410XNPJ(protein serine/threonine kinase activity); COG3321(protein serine/threonine kinase activity)	PF00109.26(ketoacyl-synt:Beta-ketoacyl synthase, N-terminal domain); PF08659.10(KR:KR domain); PF14765.6(PS-DH:Polyketide synthase dehydratase); PF00698.21(Acyl_transf_1:Acyl transferase domain); PF02801.22(Ketoacyl-synt_C:Beta-ketoacyl synthase, C-terminal domain); PF16197.5(KAsynt_C_assoc:Ketoacyl-synthetase C-terminal extension); PF00107.26(ADH_zinc_N:Zinc-binding dehydrogenase); PF00106.25(ad…	sp|G0R6S8|SORA_HYPJQ(Highly reducing polyketide synthase sor1 OS=Hypocrea jecorina (strain QM6a) OX=431241 GN=sor1 PE=2 SV=1)
31634	fgenesh1_pg.1_#_123	expressed protein	1530	7.79337	Up	0	ENOG410YA72(K:Transcription); ENOG410XUIJ(S:Function unknown); ENOG4110BEN(K:Transcription)	ENOG410YA72(fungal specific transcription factor); ENOG410XUIJ(-); ENOG4110BEN(Fungal_trans)	PF04082.18(Fungal_trans:Fungal specific transcription factor domain)	sp|G0R6T2|SORR2_HYPJQ(Sorbicillinoid biosynthetic cluster transcription factor sor3 OS=Hypocrea jecorina (strain QM6a) OX=431241 GN=sor3 PE=2 SV=1)
5539	gm1.1095_g	methyltransferase	855	7.68331	Up	0	ENOG4110YRH(S:Function unknown)	ENOG4110YRH(-)		sp|B8N0E7|ASAB_ASPFN(Hydroxylase/desaturase asaB OS=Aspergillus flavus (strain ATCC 200026 / FGSC A1120 / NRRL 3357 / JCM 12722 / SRRC 167) OX=332952 GN=asaB PE=2 SV=1)
104401	estExt_Genewise1Plus.C_320018	GroES-like protein	1164	7.53035	Up	0	COG0604(S:Function unknown)	COG0604(-)	PF00107.26(ADH_zinc_N:Zinc-binding dehydrogenase); PF13602.6(ADH_zinc_N_2:Zinc-binding dehydrogenase); PF08240.12(ADH_N:Alcohol dehydrogenase GroES-like domain)	sp|O94564|YGD6_SCHPO(Zinc-type alcohol dehydrogenase-like protein C1773.06c OS=Schizosaccharomyces pombe (strain 972 / ATCC 24843) OX=284812 GN=SPBC1773.06c PE=3 SV=1)
25763	estExt_Genemark1.C_150153	PEBP-like protein	754	7.52403	Up	3.87252e-214	ENOG4111XB2(S:Function unknown)	ENOG4111XB2(Phosphatidylethanolamine-binding protein)	PF01161.20(PBP:Phosphatidylethanolamine-binding protein)
25097	estExt_Genemark1.C_100016	NAD(P)-binding protein	1195	6.79569	Up	5.87802e-158	COG0604(S:Function unknown)	COG0604(Catalyzes the transfer of the 2-phospholactate moiety from lactyl (2) diphospho-(5')guanosine (LPPG) to 7,8-didemethyl- 8-hydroxy-5-deazariboflavin (FO) with the formation of the L- lactyl phosphodiester of 7,8-didemethyl-8-hydroxy-5- deazariboflavin (F420-0) and GMP (By similarity))	PF00107.26(ADH_zinc_N:Zinc-binding dehydrogenase); PF13602.6(ADH_zinc_N_2:Zinc-binding dehydrogenase); PF08240.12(ADH_N:Alcohol dehydrogenase GroES-like domain)	sp|O94564|YGD6_SCHPO(Zinc-type alcohol dehydrogenase-like protein C1773.06c OS=Schizosaccharomyces pombe (strain 972 / ATCC 24843) OX=284812 GN=SPBC1773.06c PE=3 SV=1)
69133	e_gw1.1.2278.1	NADH:flavin oxidoreductase/NADH oxidase family protein	1092	6.78905	Up	2.41818e-190	COG1902(G:Carbohydrate transport and metabolism)	COG1902(Alpha-1,2-mannosidase)	PF00724.20(Oxidored_FMN:NADH:flavin oxidoreductase / NADH oxidase family)	sp|W6Q9S9|FGOX3_PENRF(Chanoclavine-I aldehyde reductase fgaOx3 OS=Penicillium roqueforti (strain FM164) OX=1365484 GN=fgaOx3 PE=1 SV=1)
81999	e_gw1.12.485.1	expressed protein	1104	6.72768	Up	0	ENOG41121SE(S:Function unknown)	ENOG41121SE(Transcription factor)	PF00172.18(Zn_clus:Fungal Zn(2)-Cys(6) binuclear cluster domain)	sp|O93870|FCR1_CANAX(Fluconazole resistance protein 1 OS=Candida albicans OX=5476 GN=FCR1 PE=4 SV=1)
104814	estExt_Genewise1Plus.C_380051	MFS general substrate transporter	1578	6.316	Up	1.89234e-177	COG0477(U:Intracellular trafficking, secretion, and vesicular transport)	COG0477(GOlgi Snap Receptor complex member)	PF07690.16(MFS_1:Major Facilitator Superfamily); PF00083.24(Sugar_tr:Sugar (and other) transporter); PF06609.13(TRI12:Fungal trichothecene efflux pump (TRI12))	sp|A0A0U2UXG3|ITP1_USTMD(Itaconate transport protein OS=Ustilago maydis OX=5270 GN=ITP1 PE=3 SV=1)
95062	estExt_Genewise1Plus.C_1_t60435	General substrate transporter	2123	6.24454	Up	0	ENOG410XNQK(S:Function unknown)	ENOG410XNQK(PLAC8 family)	PF00083.24(Sugar_tr:Sugar (and other) transporter); PF07690.16(MFS_1:Major Facilitator Superfamily)	sp|P53387|KHT2_KLULC(Hexose transporter 2 OS=Kluyveromyces lactis OX=28985 GN=KHT2 PE=3 SV=1)
4579	gm1.135_g	putative isoamyl alcohol oxidase	1725	6.2236	Up	0	COG0277(K:Transcription); ENOG410XT36(K:Transcription)	COG0277(Fungal_trans); ENOG410XT36(Fungal_trans)	PF01565.23(FAD_binding_4:FAD binding domain); PF08031.12(BBE:Berberine and berberine like)	sp|G0R6T3|SORD_HYPJQ(FAD-linked oxidoreductase sor8 OS=Hypocrea jecorina (strain QM6a) OX=431241 GN=sor8 PE=3 SV=1)
93138	e_gw1.47.48.1	hypothetical protein	699	5.87997	Up	2.39448e-49	ENOG410ZG1Q(S:Function unknown); ENOG410YYTU(S:Function unknown)	ENOG410ZG1Q(-); ENOG410YYTU(Cupin domain)	PF07883.11(Cupin_2:Cupin domain)
92192	e_gw1.37.87.1	NAD(P)-binding protein	804	5.8392	Up	6.06834e-17	ENOG4111VKY(S:Function unknown)	ENOG4111VKY(-)	PF00106.25(adh_short:short chain dehydrogenase); PF13561.6(adh_short_C2:Enoyl-(Acyl carrier protein) reductase); PF13460.6(NAD_binding_10:NAD(P)H-binding); PF08659.10(KR:KR domain)	sp|Q53882|DNRE_STRS5(Aklaviketone reductase DauE OS=Streptomyces sp. (strain C5) OX=45212 GN=dauE PE=1 SV=1)
25303	estExt_Genemark1.C_110157	NADH-dependent flavin oxidoreductase-like protein	1492	5.82676	Up	0	COG1902(A:RNA processing and modification)	COG1902(PRP39 pre-mRNA processing factor 39 homolog (S. cerevisiae))	PF00724.20(Oxidored_FMN:NADH:flavin oxidoreductase / NADH oxidase family)	sp|O94467|OYEC_SCHPO(Putative NADPH dehydrogenase C23G7.10c OS=Schizosaccharomyces pombe (strain 972 / ATCC 24843) OX=284812 GN=SPBC23G7.10c PE=3 SV=1)
137069	estExt_fgenesh1_pm.C_70402	hypothetical protein	1995	5.77926	Up	0	ENOG410XPC6(S:Function unknown)	ENOG410XPC6(integral membrane protein)	PF10355.9(Ytp1:Protein of unknown function (Ytp1)); PF10348.9(DUF2427:Domain of unknown function (DUF2427))	sp|O59714|YBH6_SCHPO(Uncharacterized membrane protein C3B8.06 OS=Schizosaccharomyces pombe (strain 972 / ATCC 24843) OX=284812 GN=SPBC3B8.06 PE=1 SV=1)
91072	e_gw1.31.77.1	DSBA oxidoreductase	675	5.77393	Up	3.45786e-133	COG2761(S:Function unknown); COG0596(S:Function unknown)	COG2761(-); COG0596(Alpha beta hydrolase)	PF01323.20(DSBA:DSBA-like thioredoxin domain)
38522	fgenesh1_pg.24_#_106	hypothetical protein	1719	5.72012	Up	1.9869e-29	ENOG4110VTP(S:Function unknown); ENOG410XTI3(S:Function unknown)	ENOG4110VTP(Polyketide cyclase / dehydrase and lipid transport); ENOG410XTI3(Polyketide cyclase / dehydrase and lipid transport)	PF04082.18(Fungal_trans:Fungal specific transcription factor domain); PF00172.18(Zn_clus:Fungal Zn(2)-Cys(6) binuclear cluster domain)	sp|Q5SBL4|FSDR_FUSHE(Fusaridione A cluster transcription factor fsdR OS=Fusarium heterosporum OX=42747 GN=fsdR PE=4 SV=2)
85306	e_gw1.17.188.1	MFS general substrate transporter	1263	5.64386	Up	6.29118e-15	COG0477(S:Function unknown); ENOG410YC4J(G:Carbohydrate transport and metabolism)	COG0477(-); ENOG410YC4J(Major Facilitator Superfamily)	PF07690.16(MFS_1:Major Facilitator Superfamily)	sp|Q5AUY2|DBAD_EMENI(MFS-type transporter dbaD OS=Emericella nidulans (strain FGSC A4 / ATCC 38163 / CBS 112.46 / NRRL 194 / M139) OX=227321 GN=dbaD PE=2 SV=1)
86501	e_gw1.19.189.1	high affinity methionine permease	1605	5.60244	Up	2.45124e-92	COG0531(S:Function unknown)	COG0531(ngg1p interacting factor 3 protein, nif3)	PF13520.6(AA_permease_2:Amino acid permease)	sp|P50276|MUP1_YEAST(High-affinity methionine permease OS=Saccharomyces cerevisiae (strain ATCC 204508 / S288c) OX=559292 GN=MUP1 PE=1 SV=1)
92639	e_gw1.41.16.1	hypothetical protein	1443	5.46264	Up	3.93452e-128	ENOG41119N4(S:Function unknown)	ENOG41119N4(-)	PF11951.8(Fungal_trans_2:Fungal specific transcription factor domain)
10865	gm1.6421_g	glutathione S-transferase	759	5.3789	Up	0	COG0625(S:Function unknown)	COG0625(-)	PF02798.20(GST_N:Glutathione S-transferase, N-terminal domain); PF13417.6(GST_N_3:Glutathione S-transferase, N-terminal domain); PF13409.6(GST_N_2:Glutathione S-transferase, N-terminal domain); PF00043.25(GST_C:Glutathione S-transferase, C-terminal domain); PF14497.6(GST_C_3:Glutathione S-transferase, C-terminal domain); PF13410.6(GST_C_2:Glutathione S-transferase, C-terminal domain)	sp|P77526|YFCG_ECOLI(Disulfide-bond oxidoreductase YfcG OS=Escherichia coli (strain K12) OX=83333 GN=yfcG PE=1 SV=1)
26551	estExt_Genemark1.C_270039	putative oxidoreductase CipA-like	979	5.37321	Up	0	ENOG410YETH(S:Function unknown)	ENOG410YETH(isoflavone reductase family protein)	PF05368.13(NmrA:NmrA-like family); PF13460.6(NAD_binding_10:NAD(P)H-binding); PF03435.18(Sacchrp_dh_NADP:Saccharopine dehydrogenase NADP binding domain); PF01488.20(Shikimate_DH:Shikimate / quinate 5-dehydrogenase); PF01118.24(Semialdhyde_dh:Semialdehyde dehydrogenase, NAD binding domain)	sp|P52577|IFRH_ARATH(Isoflavone reductase homolog P3 OS=Arabidopsis thaliana OX=3702 GN=At1g75280 PE=2 SV=1)
130611	fgenesh1_pm.10_#_237	NAD(P)-binding protein	996	5.33735	Up	0	ENOG4111HNQ(S:Function unknown)	ENOG4111HNQ(-)	PF00106.25(adh_short:short chain dehydrogenase); PF08659.10(KR:KR domain); PF13561.6(adh_short_C2:Enoyl-(Acyl carrier protein) reductase)	sp|A0A097ZPD4|ANDH_EMEVA(Oxidoreductase andH OS=Emericella variicolor OX=1549217 GN=andH PE=1 SV=1)
133145	fgenesh1_pm.22_#_65	hypothetical protein	801	5.18735	Up	1.23664e-10
142356	estExt_fgenesh1_pg.C_180044	nitroreductase family protein	736	5.12761	Up	0	COG3560(I:Lipid transport and metabolism)	COG3560(alpha beta hydrolase fold)	PF00881.24(Nitroreductase:Nitroreductase family)	sp|Q96VH4|HBN1_YEAST(Putative nitroreductase HBN1 OS=Saccharomyces cerevisiae (strain ATCC 204508 / S288c) OX=559292 GN=HBN1 PE=1 SV=1)
133603	fgenesh1_pm.25_#_70	hypothetical protein	2382	5.08841	Up	3.41048e-79	COG0531(S:Function unknown)	COG0531(Conserved hypothetical, protein)	PF13520.6(AA_permease_2:Amino acid permease); PF00324.21(AA_permease:Amino acid permease)	sp|P50276|MUP1_YEAST(High-affinity methionine permease OS=Saccharomyces cerevisiae (strain ATCC 204508 / S288c) OX=559292 GN=MUP1 PE=1 SV=1)
105256	estExt_Genewise1Plus.C_510048	hypothetical protein	1630	5.05661	Up	0	ENOG410YUBE(S:Function unknown)	ENOG410YUBE(-)
93113	e_gw1.46.13.1	HET-domain containing protein	1986	5.01495	Up	3.25146e-09	ENOG4111A73(S:Function unknown); ENOG410YH02(S:Function unknown)	ENOG4111A73(Heterokaryon incompatibility protein (HET)); ENOG410YH02(Heterokaryon incompatibility protein (HET))	PF06985.11(HET:Heterokaryon incompatibility protein (HET))
72675	e_gw1.3.267.1	hypothetical protein	1593	4.97881	Up	7.14066e-17	ENOG410Z6F5(S:Function unknown); ENOG410YFR2(S:Function unknown)	ENOG410Z6F5(-); ENOG410YFR2(-)	PF04082.18(Fungal_trans:Fungal specific transcription factor domain); PF00172.18(Zn_clus:Fungal Zn(2)-Cys(6) binuclear cluster domain)	sp|A6SSW6|BOA15_BOTFB(Transcription factor BOA15 OS=Botryotinia fuckeliana (strain B05.10) OX=332648 GN=BOA15 PE=4 SV=1)
100314	estExt_Genewise1Plus.C_11_t20258	HSP20-like chaperone	828	4.95659	Up	0	ENOG410Z2YC(O:Posttranslational modification, protein turnover, chaperones); ENOG4111YTA(O:Posttranslational modification, protein turnover, chaperones)	ENOG410Z2YC(heat shock protein Hsp20 domain-containing protein); ENOG4111YTA(Heat shock protein)	PF00011.21(HSP20:Hsp20/alpha crystallin family); PF17886.1(ArsA_HSP20:HSP20-like domain found in ArsA)	sp|P19752|HSP30_NEUCR(30 kDa heat shock protein OS=Neurospora crassa (strain ATCC 24698 / 74-OR23-1A / CBS 708.71 / DSM 1257 / FGSC 987) OX=367110 GN=hsp30 PE=3 SV=1)
69988	e_gw1.1.2147.1	hypothetical protein	2016	4.90689	Up	1.19615e-08	ENOG410YEYF(K:Transcription); ENOG4110BFV(K:Transcription); COG2272(K:Transcription)	ENOG410YEYF(Fungal specific transcription factor domain); ENOG4110BFV(Fungal_trans); COG2272(Fungal_trans)	PF04082.18(Fungal_trans:Fungal specific transcription factor domain); PF00172.18(Zn_clus:Fungal Zn(2)-Cys(6) binuclear cluster domain)	sp|I1RF57|AURR2_GIBZE(Aurofusarin cluster transcription factor aurR2 OS=Gibberella zeae (strain PH-1 / ATCC MYA-4620 / FGSC 9075 / NRRL 31084) OX=229533 GN=aurR2 PE=2 SV=1)
12294	gm1.7850_g	FAD/NAD(P)-binding domain-containing protein	1161	4.89055	Up	4.4611e-53	COG0446(K:Transcription)	COG0446(Component of the Mediator complex, a coactivator involved in the regulated transcription of nearly all RNA polymerase II-dependent genes. Mediator functions as a bridge to convey information from gene-specific regulatory proteins to the basal RNA polymerase II transcription machinery. Mediator is recruited to promoters by direct interactions with regulatory proteins and serves as a scaffo…	PF07992.14(Pyr_redox_2:Pyridine nucleotide-disulphide oxidoreductase); PF00070.27(Pyr_redox:Pyridine nucleotide-disulphide oxidoreductase); PF13738.6(Pyr_redox_3:Pyridine nucleotide-disulphide oxidoreductase); PF13434.6(K_oxygenase:L-lysine 6-monooxygenase (NADPH-requiring))	sp|A0A067XMP1|PTAL_PESFW(Oxidoreductase ptaL OS=Pestalotiopsis fici (strain W106-1 / CGMCC3.15140) OX=1229662 GN=ptaL PE=2 SV=1)
138392	estExt_fgenesh1_pm.C_180085	DNase I-like protein	924	4.88363	Up	1.02767e-257	COG3568(S:Function unknown)	COG3568(Endonuclease/Exonuclease/phosphatase family)	PF03372.23(Exo_endo_phos:Endonuclease/Exonuclease/phosphatase family)
91514	e_gw1.33.70.1	NAD(P)-binding protein	705	4.85244	Up	8.14838e-30	ENOG4110WE1(S:Function unknown); ENOG410YAQ2(S:Function unknown)	ENOG4110WE1(-); ENOG410YAQ2(short chain dehydrogenase)	PF00106.25(adh_short:short chain dehydrogenase); PF13561.6(adh_short_C2:Enoyl-(Acyl carrier protein) reductase)
46613	gw1.12.186.1	hypothetical protein	1347	4.82443	Up	4.38522e-08	ENOG4110XGW(S:Function unknown); ENOG4111IQB(S:Function unknown)	ENOG4110XGW(Fungal specific transcription factor domain); ENOG4111IQB(Fungal specific transcription factor domain)	PF04082.18(Fungal_trans:Fungal specific transcription factor domain); PF00172.18(Zn_clus:Fungal Zn(2)-Cys(6) binuclear cluster domain)	sp|B6HNK4|SORR2_PENRW(Sorbicillinoid biosynthetic cluster transcription factor 2 OS=Penicillium rubens (strain ATCC 28089 / DSM 1075 / NRRL 1951 / Wisconsin 54-1255) OX=500485 GN=sorR2 PE=4 SV=1)
90011	e_gw1.27.129.1	hypothetical protein	1572	4.77961	Up	2.437e-14	ENOG41122KQ(S:Function unknown); ENOG410YDI9(S:Function unknown)	ENOG41122KQ(Conserved hypothetical, protein); ENOG410YDI9(Protein of unknown function (DUF3533))	PF12051.8(DUF3533:Protein of unknown function (DUF3533))
68521	e_gw1.1.907.1	NAD(P)-binding protein	900	4.72273	Up	7.94726e-21	ENOG410YETH(Q:Secondary metabolites biosynthesis, transport and catabolism)	ENOG410YETH(depolymerase)	PF05368.13(NmrA:NmrA-like family); PF13460.6(NAD_binding_10:NAD(P)H-binding); PF03435.18(Sacchrp_dh_NADP:Saccharopine dehydrogenase NADP binding domain); PF01370.21(Epimerase:NAD dependent epimerase/dehydratase family); PF01073.19(3Beta_HSD:3-beta hydroxysteroid dehydrogenase/isomerase family)	sp|P52577|IFRH_ARATH(Isoflavone reductase homolog P3 OS=Arabidopsis thaliana OX=3702 GN=At1g75280 PE=2 SV=1)
34062	fgenesh1_pg.5_#_1	hypothetical protein	1338	4.61891	Up	8.61114e-120	ENOG410YDU1(S:Function unknown); COG0531(S:Function unknown)	ENOG410YDU1(Vacuolar protein sorting protein 62); COG0531(Vacuolar protein sorting protein 62)	PF06101.11(Vps62:Vacuolar protein sorting-associated protein 62)	sp|Q06466|TDA6_YEAST(Putative vacuolar protein sorting-associated protein TDA6 OS=Saccharomyces cerevisiae (strain ATCC 204508 / S288c) OX=559292 GN=TDA6 PE=2 SV=1)
75778	e_gw1.5.615.1	major facilitator superfamily protein	1599	4.60367	Up	1.20883e-65	ENOG410XNQK(S:Function unknown)	ENOG410XNQK(STYKc)	PF07690.16(MFS_1:Major Facilitator Superfamily); PF06609.13(TRI12:Fungal trichothecene efflux pump (TRI12))	sp|B6HJU0|ROQT_PENRW(Efflux pump roqT OS=Penicillium rubens (strain ATCC 28089 / DSM 1075 / NRRL 1951 / Wisconsin 54-1255) OX=500485 GN=roqT PE=1 SV=1)
91662	e_gw1.34.142.1	Phosphoenolpyruvate/pyruvate domain-containing protein	888	4.60285	Up	0	COG3836(S:Function unknown)	COG3836(-)	PF03328.14(HpcH_HpaI:HpcH/HpaI aldolase/citrate lyase family)	sp|P0DOV8|KDSGA_PSEPU(2-dehydro-3,6-dideoxy-6-sulfogluconate aldolase OS=Pseudomonas putida OX=303 GN=PpSQ1_00455 PE=1 SV=1)
73700	e_gw1.3.1326.1	tartrate dehydrogenase	1113	4.55738	Up	1.10803e-06	COG0473(M:Cell wall/membrane/envelope biogenesis)	COG0473(Nad-dependent epimerase dehydratase)	PF00180.20(Iso_dh:Isocitrate/isopropylmalate dehydrogenase)	sp|P76251|DMLA_ECOLI(D-malate dehydrogenase [decarboxylating] OS=Escherichia coli (strain K12) OX=83333 GN=dmlA PE=1 SV=1)
63295	gw1.15.522.1	hypothetical protein	1029	4.54946	Up	1.10803e-06	COG3777(S:Function unknown)	COG3777(Phosphatidylethanolamine-binding protein)	PF01575.19(MaoC_dehydratas:MaoC like domain)	sp|Q9Y814|HTD2_SCHPO(Hydroxyacyl-thioester dehydratase type 2, mitochondrial OS=Schizosaccharomyces pombe (strain 972 / ATCC 24843) OX=284812 GN=htd2 PE=3 SV=1)
114328	estExt_Genewise1.C_200430	ABC multidrug transporter Mdr1	4435	4.50193	Up	0	COG1132(O:Posttranslational modification, protein turnover, chaperones)	COG1132(-)	PF00664.23(ABC_membrane:ABC transporter transmembrane region); PF00005.27(ABC_tran:ABC transporter); PF02463.19(SMC_N:RecF/RecN/SMC N terminal domain); PF13555.6(AAA_29:P-loop containing region of AAA domain)	sp|Q4WTT9|MDR1_ASPFU(ABC multidrug transporter mdr1 OS=Neosartorya fumigata (strain ATCC MYA-4609 / Af293 / CBS 101355 / FGSC A1100) OX=330879 GN=mdr1 PE=2 SV=1)
24878	estExt_Genemark1.C_80122	aldehyde dehydrogenase	1539	4.49984	Up	0	COG1012(S:Function unknown)	COG1012(-)	PF00171.22(Aldedh:Aldehyde dehydrogenase family)	sp|P40108|ALDH_DAVTA(Aldehyde dehydrogenase OS=Davidiella tassiana OX=29918 GN=CLAH10 PE=1 SV=2)
5183	gm1.739_g	hypothetical protein	2127	4.48618	Up	1.68567e-33	ENOG410YFMX(S:Function unknown); ENOG410YZRD(K:Transcription)	ENOG410YFMX(Fungal specific transcription factor domain); ENOG410YZRD(C6 zinc finger domain protein)	PF00172.18(Zn_clus:Fungal Zn(2)-Cys(6) binuclear cluster domain); PF04082.18(Fungal_trans:Fungal specific transcription factor domain)	sp|Q9C469|GRT1_SCHPO(Zinc finger protein grt1 OS=Schizosaccharomyces pombe (strain 972 / ATCC 24843) OX=284812 GN=grt1 PE=1 SV=1)
25762	estExt_Genemark1.C_150151	hypothetical protein	2696	4.48252	Up	0	ENOG410XS5J(S:Function unknown); ENOG410YG7T(K:Transcription)	ENOG410XS5J(prolyl 4-hydroxylase); ENOG410YG7T(Fungal Zn(2)-Cys(6) binuclear cluster domain)	PF00172.18(Zn_clus:Fungal Zn(2)-Cys(6) binuclear cluster domain); PF04082.18(Fungal_trans:Fungal specific transcription factor domain)	sp|Q1ERI1|CTNR_MONPU(Citrinin biosynthesis transcriptional activator ctnR OS=Monascus purpureus OX=5098 GN=ctnR PE=3 SV=1)
82459	e_gw1.12.508.1	hypothetical protein	2418	4.45943	Up	2.10588e-06	ENOG4111344(S:Function unknown)	ENOG4111344(-)
80179	e_gw1.9.491.1	carboxypeptidase-like protein A4 precursor	1329	4.45213	Up	3.99646e-06	COG2866(S:Function unknown)	COG2866(-)	PF00246.24(Peptidase_M14:Zinc carboxypeptidase)	sp|A6XGK3|MCPA_TRIRU(Metallocarboxypeptidase A OS=Trichophyton rubrum OX=5551 GN=MCPA PE=1 SV=1)
93861	estExt_Genewise1Plus.C_1_t10373	hypothetical protein	2020	4.45167	Up	0	ENOG410Y92B(K:Transcription); ENOG410YCWZ(S:Function unknown)	ENOG410Y92B(Fungal specific transcription factor domain); ENOG410YCWZ(Transcription factor)	PF04082.18(Fungal_trans:Fungal specific transcription factor domain); PF00172.18(Zn_clus:Fungal Zn(2)-Cys(6) binuclear cluster domain)	sp|G0R6T4|SORR1_HYPJQ(Sorbicillinoid biosynthetic cluster transcription factor sor4 OS=Hypocrea jecorina (strain QM6a) OX=431241 GN=sor4 PE=4 SV=1)
73303	e_gw1.3.811.1	xenobiotic compound monooxygenase%2C DszA family	1428	4.44001	Up	1.01048e-21	COG2141(S:Function unknown)	COG2141(N-alpha-acetyltransferase 25, NatB auxiliary subunit)	PF00296.20(Bac_luciferase:Luciferase-like monooxygenase)	sp|E9JFX9|DMOA_HYPSL(Dimethyl-sulfide monooxygenase OS=Hyphomicrobium sulfonivorans OX=121290 GN=dmoA PE=1 SV=1)
89490	e_gw1.26.364.1	dienelactone hydrolase family protein	750	4.42626	Up	1.30513e-36	COG0412(S:Function unknown)	COG0412(Conserved hypothetical, protein)	PF01738.18(DLH:Dienelactone hydrolase family)	sp|O14359|YB4E_SCHPO(Uncharacterized AIM2 family protein C30D10.14 OS=Schizosaccharomyces pombe (strain 972 / ATCC 24843) OX=284812 GN=SPBC30D10.14 PE=3 SV=1)
128734	fgenesh1_pm.5_#_272	YeeE/YedE family protein	990	4.42492	Up	2.8442e-11	ENOG4111YZS(S:Function unknown)	ENOG4111YZS(YeeE YedE family protein)	PF04143.14(Sulf_transp:Sulphur transport)
100447	estExt_Genewise1Plus.C_12_t10264	NAD(P)-binding protein	1231	4.40244	Up	0	ENOG410XSSV(S:Function unknown)	ENOG410XSSV(-)	PF01370.21(Epimerase:NAD dependent epimerase/dehydratase family); PF13460.6(NAD_binding_10:NAD(P)H-binding); PF05368.13(NmrA:NmrA-like family); PF03435.18(Sacchrp_dh_NADP:Saccharopine dehydrogenase NADP binding domain)
83535	e_gw1.14.248.1	glycosyl hydrolase	2034	4.39494	Up	1.23241e-241	COG3387(G:Carbohydrate transport and metabolism)	COG3387(glycoside hydrolase 15-related)	PF00723.21(Glyco_hydro_15:Glycosyl hydrolases family 15)	sp|Q10211|YAY3_SCHPO(Uncharacterized protein C4H3.03c OS=Schizosaccharomyces pombe (strain 972 / ATCC 24843) OX=284812 GN=SPAC4H3.03c PE=4 SV=1)
90402	e_gw1.28.134.1	FAD/NAD(P)-binding domain-containing protein	1686	4.39473	Up	1.49749e-40	ENOG410XPDJ(S:Function unknown)	ENOG410XPDJ(Flavin-binding monooxygenase-like protein)	PF13738.6(Pyr_redox_3:Pyridine nucleotide-disulphide oxidoreductase); PF13434.6(K_oxygenase:L-lysine 6-monooxygenase (NADPH-requiring)); PF00743.19(FMO-like:Flavin-binding monooxygenase-like); PF07992.14(Pyr_redox_2:Pyridine nucleotide-disulphide oxidoreductase)	sp|A0A0M9ER62|DEP4_FUSLA(FAD-dependent monooxygenase DEP4 OS=Fusarium langsethiae OX=179993 GN=DEP4 PE=2 SV=1)
140537	estExt_fgenesh1_pg.C_3_t10422	zinc finger protein	927	4.37756	Up	0	ENOG4111JCH(S:Function unknown)	ENOG4111JCH(zinc finger)	PF01428.16(zf-AN1:AN1-like Zinc finger)	sp|Q8TCF1|ZFAN1_HUMAN(AN1-type zinc finger protein 1 OS=Homo sapiens OX=9606 GN=ZFAND1 PE=1 SV=1)
88777	e_gw1.24.80.1	Aldolase	972	4.37346	Up	7.00638e-93	COG0329(S:Function unknown)	COG0329(-)	PF00701.22(DHDPS:Dihydrodipicolinate synthetase family)	sp|P0CL20|HOGA1_COCIM(Putative 4-hydroxy-2-oxoglutarate aldolase, mitochondrial OS=Coccidioides immitis (strain RS) OX=246410 GN=CIMG_00151 PE=3 SV=1)
72297	e_gw1.3.671.1	hypothetical protein	2004	4.37311	Up	1.8552e-30	COG0591(S:Function unknown)	COG0591(N-alpha-acetyltransferase 25, NatB auxiliary subunit)	PF00474.17(SSF:Sodium:solute symporter family)	sp|O94469|DUR31_SCHPO(Probable urea active transporter 1 OS=Schizosaccharomyces pombe (strain 972 / ATCC 24843) OX=284812 GN=dur3-1 PE=3 SV=1)
127490	fgenesh1_pm.3_#_79	hypothetical protein	747	4.35552	Up	1.18998e-233	COG0689(S:Function unknown)	COG0689(-)	PF01138.21(RNase_PH:3' exoribonuclease family, domain 1)	sp|P53256|RRP46_YEAST(Exosome complex component RRP46 OS=Saccharomyces cerevisiae (strain ATCC 204508 / S288c) OX=559292 GN=RRP46 PE=1 SV=2)
35762	fgenesh1_pg.9_#_283	glutathione S-transferase domain-containing protein	693	4.32487	Up	3.10844e-112	ENOG4111MKK(O:Posttranslational modification, protein turnover, chaperones)	ENOG4111MKK(glutathione Stransferase)	PF13409.6(GST_N_2:Glutathione S-transferase, N-terminal domain); PF13417.6(GST_N_3:Glutathione S-transferase, N-terminal domain); PF02798.20(GST_N:Glutathione S-transferase, N-terminal domain)	sp|P81065|GST_OCHAN(Glutathione S-transferase OS=Ochrobactrum anthropi OX=529 GN=gst PE=1 SV=2)
119856	fgenesh2_kg.15_#_89_#_gi|30114716|gb|CB900058.1|CB900058	hypothetical protein	604	4.31504	Up	1.43224e-05
38582	fgenesh1_pg.25_#_24	NAD(P)-binding protein	885	4.2888	Up	1.22507e-122	ENOG410YA1N(S:Function unknown)	ENOG410YA1N(-)	PF00106.25(adh_short:short chain dehydrogenase); PF13561.6(adh_short_C2:Enoyl-(Acyl carrier protein) reductase)	sp|Q8TC12|RDH11_HUMAN(Retinol dehydrogenase 11 OS=Homo sapiens OX=9606 GN=RDH11 PE=1 SV=2)
116947	fgenesh2_kg.1_#_20_#_gi|38137799|gb|CF883117.1|CF883117	expressed protein	408	4.27009	Up	1.43224e-05
92694	e_gw1.41.132.1	hypothetical protein	1866	4.24793	Up	6.26084e-23	ENOG410XR72(I:Lipid transport and metabolism)	ENOG410XR72(phospholipase A2 group)	PF01735.18(PLA2_B:Lysophospholipase catalytic domain)	sp|B0Y665|PLB1_ASPFC(Lysophospholipase 1 OS=Neosartorya fumigata (strain CEA10 / CBS 144.89 / FGSC A1163) OX=451804 GN=plb1 PE=1 SV=1)
136279	estExt_fgenesh1_pm.C_3_t10398	hypothetical protein	1172	4.22315	Up	1.13629e-56	ENOG4111PDB(S:Function unknown)	ENOG4111PDB(gliotoxin biosynthesis protein GliK)	PF13772.6(AIG2_2:AIG2-like family)	sp|E9R9Y3|GLIK_ASPFU(Gamma-glutamyl cyclotransferase gliK OS=Neosartorya fumigata (strain ATCC MYA-4609 / Af293 / CBS 101355 / FGSC A1100) OX=330879 GN=gliK PE=3 SV=1)
85167	e_gw1.17.530.1	hypothetical protein	333	4.21745	Up	2.20894e-22	COG0667(S:Function unknown)	COG0667(Glycosyl hydrolase family 45)
79103	e_gw1.8.645.1	hypothetical protein	600	4.21126	Up	6.96796e-77	ENOG410YR83(S:Function unknown); ENOG410ZPKQ(S:Function unknown)	ENOG410YR83(RNAse P Rpr2/Rpp21/SNM1 subunit domain); ENOG410ZPKQ(RNAse P Rpr2/Rpp21/SNM1 subunit domain)	PF04032.16(Rpr2:RNAse P Rpr2/Rpp21/SNM1 subunit domain)
94212	estExt_Genewise1Plus.C_1_t30045	MFS general substrate transporter	1806	4.18573	Up	1.7352e-219	COG0477(S:Function unknown)	COG0477(Conserved hypothetical, protein)	PF07690.16(MFS_1:Major Facilitator Superfamily)	sp|A0A0B5EMG9|FUB11_FUSOX(Efflux pump FUBT OS=Fusarium oxysporum OX=5507 GN=FUBT PE=1 SV=1)
36827	fgenesh1_pg.14_#_106	NAD(P)-binding protein	927	4.18388	Up	8.57176e-26	ENOG410YBW2(S:Function unknown)	ENOG410YBW2(KR domain)	PF00106.25(adh_short:short chain dehydrogenase); PF13561.6(adh_short_C2:Enoyl-(Acyl carrier protein) reductase); PF08659.10(KR:KR domain); PF02719.15(Polysacc_synt_2:Polysaccharide biosynthesis protein)	sp|A0A144Y7G4|CITE_MONPU(Short chain dehydrogenase mpl6 OS=Monascus purpureus OX=5098 GN=mpl6 PE=1 SV=1)
128869	fgenesh1_pm.6_#_3	NAD(P)-binding protein	1065	4.17819	Up	2.12658e-42	ENOG4112AYD(S:Function unknown); ENOG4112183(S:Function unknown)	ENOG4112AYD(NAD dependent epimerase/dehydratase family); ENOG4112183(NAD dependent epimerase/dehydratase family)	PF01370.21(Epimerase:NAD dependent epimerase/dehydratase family); PF05368.13(NmrA:NmrA-like family); PF13460.6(NAD_binding_10:NAD(P)H-binding); PF01073.19(3Beta_HSD:3-beta hydroxysteroid dehydrogenase/isomerase family)
32680	fgenesh1_pg.2_#_208	hypothetical protein	1032	4.1728	Up	3.77292e-58	ENOG4111HZ2(S:Function unknown)	ENOG4111HZ2(Conserved hypothetical, protein)	PF11309.8(DUF3112:Protein of unknown function (DUF3112))
70100	e_gw1.1.2325.1	Six-hairpin glycosidase	1728	4.16419	Up	2.41262e-09	ENOG410XPIN(G:Carbohydrate transport and metabolism)	ENOG410XPIN(glycosyl hydrolase)	PF03663.14(Glyco_hydro_76:Glycosyl hydrolase family 76)	sp|Q6FLP9|DCW1_CANGA(Mannan endo-1,6-alpha-mannosidase DCW1 OS=Candida glabrata (strain ATCC 2001 / CBS 138 / JCM 3761 / NBRC 0622 / NRRL Y-65) OX=284593 GN=DCW1 PE=3 SV=1)
91501	e_gw1.33.156.1	hypothetical protein	459	4.15045	Up	5.0941e-05	ENOG41127BV(S:Function unknown)	ENOG41127BV(Conserved hypothetical, protein)
98774	estExt_Genewise1Plus.C_8_t10149	MFS general substrate transporter	2238	4.1375	Up	9.5755e-05	COG0477(L:Replication, recombination and repair); ENOG4110Z27(U:Intracellular trafficking, secretion, and vesicular transport)	COG0477(X-ray repair complementing defective repair in Chinese hamster cells 6); ENOG4110Z27(Major Facilitator Superfamily)	PF07690.16(MFS_1:Major Facilitator Superfamily)	sp|O94528|CAF5_SCHPO(Caffeine resistance protein 5 OS=Schizosaccharomyces pombe (strain 972 / ATCC 24843) OX=284812 GN=caf5 PE=3 SV=1)
102005	estExt_Genewise1Plus.C_17_t20008	NAD(P)-binding protein	1327	4.13516	Up	2.4084e-13			PF13460.6(NAD_binding_10:NAD(P)H-binding); PF05368.13(NmrA:NmrA-like family); PF03435.18(Sacchrp_dh_NADP:Saccharopine dehydrogenase NADP binding domain)
126284	fgenesh1_pm.1_#_698	DUF500-domain containing protein	1755	4.10093	Up	4.65996e-246	COG2930(G:Carbohydrate transport and metabolism)	COG2930(Glycoside hydrolase family 55)	PF04366.12(Ysc84:Las17-binding protein actin regulator)	sp|Q96HL8|SH3Y1_HUMAN(SH3 domain-containing YSC84-like protein 1 OS=Homo sapiens OX=9606 GN=SH3YL1 PE=1 SV=1)
139316	estExt_fgenesh1_pm.C_350015	alcohol dehydrogenase class-3	1142	4.08939	Up	1.28896e-156	COG0604(P:Inorganic ion transport and metabolism)	COG0604(zinc transporter)	PF00107.26(ADH_zinc_N:Zinc-binding dehydrogenase); PF08240.12(ADH_N:Alcohol dehydrogenase GroES-like domain)	sp|D7UPN2|ACTS2_ALTAL(Trans-enoyl reductase ACTTS2 OS=Alternaria alternata OX=5599 GN=ACTTS2 PE=3 SV=1)
131260	fgenesh1_pm.13_#_67	hypothetical protein	1203	4.07895	Up	9.5755e-05	ENOG410Z17I(S:Function unknown); ENOG410Y5B8(S:Function unknown)	ENOG410Z17I(-); ENOG410Y5B8(-)
44119	gw1.1.476.1	hypothetical protein	249	4.07298	Up	3.01644e-64	ENOG410XZIJ(S:Function unknown)	ENOG410XZIJ(-)
76904	e_gw1.6.835.1	urea active transporter	2037	4.01495	Up	9.5755e-05	COG0591(E:Amino acid transport and metabolism)	COG0591(symporter)	PF00474.17(SSF:Sodium:solute symporter family)	sp|O94469|DUR31_SCHPO(Probable urea active transporter 1 OS=Schizosaccharomyces pombe (strain 972 / ATCC 24843) OX=284812 GN=dur3-1 PE=3 SV=1)
129790	fgenesh1_pm.8_#_33	hypothetical protein	609	3.98614	Up	3.76664e-15	ENOG410XXKU(S:Function unknown)	ENOG410XXKU(Transmembrane protein 42)
91554	e_gw1.33.193.1	hypothetical protein	1719	3.96523	Up	1.92419e-11	ENOG410YJQZ(S:Function unknown)	ENOG410YJQZ(Pfam:DUF3468)	PF11951.8(Fungal_trans_2:Fungal specific transcription factor domain); PF00172.18(Zn_clus:Fungal Zn(2)-Cys(6) binuclear cluster domain)
74374	e_gw1.4.341.1	hypothetical protein	2019	3.96193	Up	5.41188e-22	ENOG410YFQ4(S:Function unknown)	ENOG410YFQ4(Transcription factor)	PF04082.18(Fungal_trans:Fungal specific transcription factor domain); PF00172.18(Zn_clus:Fungal Zn(2)-Cys(6) binuclear cluster domain)	sp|Q10086|YAO7_SCHPO(Uncharacterized transcriptional regulatory protein C11D3.07c OS=Schizosaccharomyces pombe (strain 972 / ATCC 24843) OX=284812 GN=SPAC11D3.07c PE=4 SV=3)
88316	e_gw1.23.196.1	ABC1-domain containing protein	1725	3.96083	Up	1.92419e-11	COG0661(G:Carbohydrate transport and metabolism)	COG0661(chitinase)	PF03109.16(ABC1:ABC1 family)	sp|A0A179HKZ8|LCSO_PURLI(ABC1 family protein lscO OS=Purpureocillium lilacinum OX=33203 GN=lcsO PE=2 SV=1)
26579	estExt_Genemark1.C_270100	hypothetical protein	1632	3.94374	Up	1.11933e-31	ENOG4111YIN(S:Function unknown)	ENOG4111YIN(Conserved hypothetical, protein)
73914	e_gw1.4.1160.1	ABC transporter	4140	3.91571	Up	2.73074e-200	COG0842(S:Function unknown)	COG0842(Transcription factor)	PF01061.24(ABC2_membrane:ABC-2 type transporter); PF00005.27(ABC_tran:ABC transporter); PF06422.12(PDR_CDR:CDR ABC transporter); PF13191.6(AAA_16:AAA ATPase domain); PF14510.6(ABC_trans_N:ABC-transporter N-terminal); PF13481.6(AAA_25:AAA domain); PF03193.16(RsgA_GTPase:RsgA GTPase); PF13555.6(AAA_29:P-loop containing region of AAA domain); PF12698.7(ABC2_membrane_3:ABC-2 family transporter protei…	sp|Q4WDD4|ATRF_ASPFU(ABC multidrug transporter atrF OS=Neosartorya fumigata (strain ATCC MYA-4609 / Af293 / CBS 101355 / FGSC A1100) OX=330879 GN=atrF PE=2 SV=1)
86104	e_gw1.18.221.1	putative microsomal glutathione S-transferase 3	453	3.91336	Up	1.41368e-72	ENOG4111URX(O:Posttranslational modification, protein turnover, chaperones)	ENOG4111URX(microsomal glutathione S-transferase)	PF01124.18(MAPEG:MAPEG family)
124246	estExt_fgenesh2_kg.C_160092	Hsp70 nucleotide exchange factor	847	3.90856	Up	0	ENOG4111ZH4(K:Transcription); ENOG4111PX3(K:Transcription)	ENOG4111ZH4(Functions as a nucleotide exchange factor (NEF) for Hsp70 chaperones which accelerates the release of ADP. Required for fully efficient Hsp70-mediated folding of proteins (By similarity)); ENOG4111PX3(Functions as a nucleotide exchange factor (NEF) for Hsp70 chaperones which accelerates the release of ADP. Required for fully efficient Hsp70-mediated folding of proteins (By similarity))	PF08609.10(Fes1:Nucleotide exchange factor Fes1); PF13646.6(HEAT_2:HEAT repeats)	sp|Q4I624|FES1_GIBZE(Hsp70 nucleotide exchange factor FES1 OS=Gibberella zeae (strain PH-1 / ATCC MYA-4620 / FGSC 9075 / NRRL 31084) OX=229533 GN=FES1 PE=3 SV=1)
82420	e_gw1.12.23.1	putative oligopeptide transporter	2388	3.90249	Up	3.43022e-114	ENOG410XNZC(U:Intracellular trafficking, secretion, and vesicular transport)	ENOG410XNZC(Tumor susceptibility gene 101)	PF03169.15(OPT:OPT oligopeptide transporter protein)	sp|O23482|OPT3_ARATH(Oligopeptide transporter 3 OS=Arabidopsis thaliana OX=3702 GN=OPT3 PE=2 SV=3)
68509	e_gw1.1.1209.1	Glycoside hydrolase	1230	3.89552	Up	2.55228e-151	COG2730(S:Function unknown)	COG2730(Conserved hypothetical, protein)	PF00150.18(Cellulase:Cellulase (glycosyl hydrolase family 5))	sp|P23548|GUN_PAEPO(Endoglucanase OS=Paenibacillus polymyxa OX=1406 PE=3 SV=2)
134674	fgenesh1_pm.37_#_7	putative JmjC domain protein	1020	3.88468	Up	8.37024e-14	ENOG410XQDR(S:Function unknown)	ENOG410XQDR(Domain-Containing protein)	PF13621.6(Cupin_8:Cupin-like domain)	sp|Q55DF5|JMJCD_DICDI(JmjC domain-containing protein D OS=Dictyostelium discoideum OX=44689 GN=jcdD PE=4 SV=1)
75641	e_gw1.5.122.1	WD40 repeat-like protein	1527	3.87544	Up	7.3341e-108	ENOG410XP4W(S:Function unknown)	ENOG410XP4W(ddb1 and cul4 associated factor 11)	PF00400.32(WD40:WD domain, G-beta repeat); PF12894.7(ANAPC4_WD40:Anaphase-promoting complex subunit 4 WD40 domain)	sp|O24467|LE14B_PRUAR(LEC14B homolog OS=Prunus armeniaca OX=36596 PE=2 SV=1)
120303	fgenesh2_kg.21_#_36_#_gi|38127402|gb|CF872720.1|CF872720	expressed protein	444	3.87361	Up	5.82518e-17
103763	estExt_Genewise1Plus.C_270127	hypothetical protein	2281	3.87095	Up	1.06757e-51	ENOG410Y9PA(S:Function unknown)	ENOG410Y9PA(-)	PF00172.18(Zn_clus:Fungal Zn(2)-Cys(6) binuclear cluster domain); PF04082.18(Fungal_trans:Fungal specific transcription factor domain)
12058	gm1.7614_g	hypothetical protein	537	3.86911	Up	1.92666e-07	ENOG4110WE0(S:Function unknown)	ENOG4110WE0(-)
80674	e_gw1.10.586.1	hypothetical protein	558	3.86748	Up	1.92666e-07	ENOG410XTT2(S:Function unknown)	ENOG410XTT2(Conserved hypothetical, protein)	PF09447.10(Cnl2_NKP2:Cnl2/NKP2 family protein)
92206	e_gw1.37.10.1	hypothetical protein	2004	3.8646	Up	5.82518e-17	ENOG410YG8D(S:Function unknown); ENOG4111VV2(S:Function unknown)	ENOG410YG8D(GAL4); ENOG4111VV2(-)	PF00172.18(Zn_clus:Fungal Zn(2)-Cys(6) binuclear cluster domain)	sp|A0A2Z5U1Z1|HIMD_ASPJA(Transcription factor himD OS=Aspergillus japonicus OX=34381 GN=himD PE=3 SV=1)
88947	e_gw1.24.238.1	hypothetical protein	1125	3.8625	Up	0.000335724	ENOG4111MZC(S:Function unknown)	ENOG4111MZC(-)
6310	gm1.1866_g	hypothetical protein	2586	3.85244	Up	3.57934e-07	ENOG410ZIQC(S:Function unknown)	ENOG410ZIQC(Conserved hypothetical, protein)	PF17667.1(Pkinase_fungal:Fungal protein kinase)
83724	e_gw1.14.467.1	phosphoadenosine phosphosulfate reductase	903	3.84757	Up	0	COG0175(P:Inorganic ion transport and metabolism)	COG0175(Reduction of activated sulfate into sulfite (By similarity))	PF01507.19(PAPS_reduct:Phosphoadenosine phosphosulfate reductase family)	sp|P56859|MET16_EMENI(Phosphoadenosine phosphosulfate reductase OS=Emericella nidulans (strain FGSC A4 / ATCC 38163 / CBS 112.46 / NRRL 194 / M139) OX=227321 GN=sA PE=3 SV=3)
91130	e_gw1.31.204.1	MFS general substrate transporter	1536	3.79181	Up	1.52428e-97	ENOG410YF42(G:Carbohydrate transport and metabolism)	ENOG410YF42(Transporter)	PF07690.16(MFS_1:Major Facilitator Superfamily)	sp|A0A089FNE5|PRLL_FUNXX(MFS transporter prlL OS=Fungal sp. (strain NRRL 50135) OX=1547289 GN=prlL PE=3 SV=1)
73557	e_gw1.3.569.1	hypothetical protein	1608	3.78136	Up	0.000335724	ENOG410YAX0(S:Function unknown)	ENOG410YAX0(Conserved hypothetical, protein)	PF13813.6(MBOAT_2:Membrane bound O-acyl transferase family)	sp|G3Y421|YANI_ASPNA(O-Mevalon transferase yanI OS=Aspergillus niger (strain ATCC 1015 / CBS 113.46 / FGSC A1144 / LSHB Ac4 / NCTC 3858a / NRRL 328 / USDA 3528.7) OX=380704 GN=yanI PE=1 SV=1)
138235	estExt_fgenesh1_pm.C_160169	ABC transporter family protein	4383	3.77465	Up	0	COG1132(J:Translation, ribosomal structure and biogenesis)	COG1132(Exosome complex)	PF00664.23(ABC_membrane:ABC transporter transmembrane region); PF00005.27(ABC_tran:ABC transporter)	sp|A0A0D1CZ63|FER6_USTMA(Multidrug resistance protein fer6 OS=Ustilago maydis (strain 521 / FGSC 9021) OX=237631 GN=fer6 PE=2 SV=1)
143150	estExt_fgenesh1_pg.C_340049	putative C6 transcription factor	1794	3.76081	Up	9.83428e-13	ENOG410Y98U(K:Transcription)	ENOG410Y98U(C6 transcription factor)	PF00172.18(Zn_clus:Fungal Zn(2)-Cys(6) binuclear cluster domain)	sp|Q4I0C5|RDR1_GIBZE(Protein RDR1 OS=Gibberella zeae (strain PH-1 / ATCC MYA-4620 / FGSC 9075 / NRRL 31084) OX=229533 GN=RDR1 PE=3 SV=1)
132225	fgenesh1_pm.17_#_93	fatty acid desaturase	1647	3.73533	Up	1.45567e-09	ENOG410XVSZ(S:Function unknown)	ENOG410XVSZ(Fungal_trans)	PF00487.24(FA_desaturase:Fatty acid desaturase); PF00173.28(Cyt-b5:Cytochrome b5-like Heme/Steroid binding domain)	sp|C4QVU3|SLD1_KOMPG(Delta 8-(E)-sphingolipid desaturase OS=Komagataella phaffii (strain GS115 / ATCC 20864) OX=644223 GN=PAS_chr1-1_0013 PE=3 SV=1)
91269	e_gw1.31.3.1	NADH:flavin oxidoreductase/NADH oxidase	1332	3.70261	Up	0	COG1902(S:Function unknown)	COG1902(Alpha beta hydrolase)	PF00724.20(Oxidored_FMN:NADH:flavin oxidoreductase / NADH oxidase family)	sp|Q6UEF0|NADA_ASPPU(NADH-dependent flavin oxidoreductase nadA OS=Aspergillus parasiticus (strain ATCC 56775 / NRRL 5862 / SRRC 143 / SU-1) OX=1403190 GN=nadA PE=2 SV=1)
101290	estExt_Genewise1Plus.C_15_t10026	hypothetical protein	2244	3.6893	Up	2.57152e-46	ENOG410YEKK(S:Function unknown); ENOG410YJDY(S:Function unknown)	ENOG410YEKK(Fungal specific transcription factor domain); ENOG410YJDY(GAL4)	PF04082.18(Fungal_trans:Fungal specific transcription factor domain); PF00172.18(Zn_clus:Fungal Zn(2)-Cys(6) binuclear cluster domain)	sp|B8NJG5|LEPB_ASPFN(Probable transcription factor lepB OS=Aspergillus flavus (strain ATCC 200026 / FGSC A1120 / NRRL 3357 / JCM 12722 / SRRC 167) OX=332952 GN=lepB PE=4 SV=1)
83920	e_gw1.15.214.1	hypothetical protein	1971	3.68182	Up	4.9487e-09	ENOG410YEK9(K:Transcription)	ENOG410YEK9(Transcription factor)	PF04082.18(Fungal_trans:Fungal specific transcription factor domain); PF00172.18(Zn_clus:Fungal Zn(2)-Cys(6) binuclear cluster domain)	sp|P11638|QA1F_NEUCR(Quinic acid utilization activator OS=Neurospora crassa (strain ATCC 24698 / 74-OR23-1A / CBS 708.71 / DSM 1257 / FGSC 987) OX=367110 GN=qa-1f PE=4 SV=2)
86288	e_gw1.19.218.1	hypothetical protein	642	3.66145	Up	0	ENOG4111N8U(S:Function unknown)	ENOG4111N8U(Conserved hypothetical, protein)		sp|Q9HDU7|YHE8_SCHPO(UPF0643 protein PB2B2.08 OS=Schizosaccharomyces pombe (strain 972 / ATCC 24843) OX=284812 GN=SPBPB2B2.08 PE=3 SV=1)
71323	e_gw1.2.1901.1	hypothetical protein	1767	3.65535	Up	9.1027e-09	ENOG4111UC4(S:Function unknown)	ENOG4111UC4(-)	PF12813.7(XPG_I_2:XPG domain containing)
32445	fgenesh1_pg.1_#_934	hypothetical protein	1308	3.62519	Up	2.17316e-16	ENOG410XYKZ(S:Function unknown)	ENOG410XYKZ(Conserved hypothetical, protein)
76172	e_gw1.5.95.1	NAD(P)-binding protein	1092	3.60805	Up	1.35752e-55	COG0604(C:Energy production and conversion)	COG0604(alcohol dehydrogenase)	PF00107.26(ADH_zinc_N:Zinc-binding dehydrogenase); PF13602.6(ADH_zinc_N_2:Zinc-binding dehydrogenase)	sp|E5AE42|YOGA_LEPMJ(Zinc-type alcohol dehydrogenase-like protein YogA OS=Leptosphaeria maculans (strain JN3 / isolate v23.1.3 / race Av1-4-5-6-7-8) OX=985895 GN=Yog1 PE=2 SV=1)
134067	fgenesh1_pm.29_#_8	Bacterial bifunctional deaminase-reductase	810	3.57469	Up	1.67154e-08	COG1985(H:Coenzyme transport and metabolism)	COG1985(Converts 2,5-diamino-6-(ribosylamino)-4(3h)-pyrimidinone 5'-phosphate into 5-amino-6-(ribosylamino)-2,4(1h,3h)- pyrimidinedione 5'-phosphate (By similarity))	PF01872.17(RibD_C:RibD C-terminal domain)	sp|Q6BII9|RIB7_DEBHA(2,5-diamino-6-ribosylamino-4(3H)-pyrimidinone 5'-phosphate reductase OS=Debaryomyces hansenii (strain ATCC 36239 / CBS 767 / JCM 1990 / NBRC 0083 / IGC 2968) OX=284592 GN=RIB7 PE=3 SV=1)
91472	e_gw1.33.172.1	DUF967 domain protein	615	3.56138	Up	1.12174e-144	COG4702(S:Function unknown)	COG4702(UPF0303 protein)	PF03928.14(Haem_degrading:Haem-degrading)	sp|Q82CX8|Y5210_STRAW(UPF0303 protein SAV_5210 OS=Streptomyces avermitilis (strain ATCC 31267 / DSM 46492 / JCM 5070 / NBRC 14893 / NCIMB 12804 / NRRL 8165 / MA-4680) OX=227882 GN=SAV_5210 PE=3 SV=1)
132334	fgenesh1_pm.17_#_202	putative monocarboxylate transporter	1260	3.5446	Up	3.83944e-36	COG0477(S:Function unknown)	COG0477(-)	PF07690.16(MFS_1:Major Facilitator Superfamily)	sp|B8N0F1|ASAE_ASPFN(MFS transporter asaE OS=Aspergillus flavus (strain ATCC 200026 / FGSC A1120 / NRRL 3357 / JCM 12722 / SRRC 167) OX=332952 GN=asaE PE=2 SV=1)
45136	gw1.38.28.1	hypothetical protein	672	3.52927	Up	0	ENOG4111V0I(O:Posttranslational modification, protein turnover, chaperones)	ENOG4111V0I(mitochondrial intermembrane space import and assembly protein)	PF06747.13(CHCH:CHCH domain)	sp|Q4IK03|MIA40_GIBZE(Mitochondrial intermembrane space import and assembly protein 40 OS=Gibberella zeae (strain PH-1 / ATCC MYA-4620 / FGSC 9075 / NRRL 31084) OX=229533 GN=MIA40 PE=3 SV=2)
103555	estExt_Genewise1Plus.C_250292	heavy metal translocatin	3333	3.50892	Up	4.43378e-64	COG2217(C:Energy production and conversion)	COG2217(Oxidoreductase required for the transfer of electrons from pyruvate to flavodoxin (By similarity))	PF00122.20(E1-E2_ATPase:E1-E2 ATPase); PF00702.26(Hydrolase:haloacid dehalogenase-like hydrolase); PF00403.26(HMA:Heavy-metal-associated domain); PF08282.12(Hydrolase_3:haloacid dehalogenase-like hydrolase); PF12710.7(HAD:haloacid dehalogenase-like hydrolase)	sp|Q6H7M3|HMA4_ORYSJ(Copper-transporting ATPase HMA4 OS=Oryza sativa subsp. japonica OX=39947 GN=HMA4 PE=1 SV=1)
138633	estExt_fgenesh1_pm.C_210043	POT family protein	1797	3.50004	Up	2.80246e-70	COG3104(S:Function unknown)	COG3104(Conserved hypothetical, protein)	PF00854.21(PTR2:POT family)	sp|P32901|PTR2_YEAST(Peptide transporter PTR2 OS=Saccharomyces cerevisiae (strain ATCC 204508 / S288c) OX=559292 GN=PTR2 PE=1 SV=2)
68899	e_gw1.1.1393.1	hypothetical protein	984	3.49825	Up	4.28696e-10	COG1073(S:Function unknown)	COG1073(-)	PF07859.13(Abhydrolase_3:alpha/beta hydrolase fold); PF00561.20(Abhydrolase_1:alpha/beta hydrolase fold)	sp|P54069|BEM46_SCHPO(Protein bem46 OS=Schizosaccharomyces pombe (strain 972 / ATCC 24843) OX=284812 GN=bem46 PE=2 SV=3)
5334	gm1.890_g	NAD(P)-binding protein	1146	3.49642	Up	0	COG0673(S:Function unknown)	COG0673(fasciclin domain family protein)	PF01408.22(GFO_IDH_MocA:Oxidoreductase family, NAD-binding Rossmann fold); PF03447.16(NAD_binding_3:Homoserine dehydrogenase, NAD binding domain)	sp|Q2UPA7|ACLE_ASPOR(Dehydrogenase aclE OS=Aspergillus oryzae (strain ATCC 42149 / RIB 40) OX=510516 GN=aclE PE=3 SV=1)
88458	e_gw1.23.103.1	S-adenosyl-L-methionine-dependent methyltransferase	885	3.48746	Up	0	ENOG410XXS8(S:Function unknown); ENOG4111ZG1(S:Function unknown)	ENOG410XXS8(methyltransferase); ENOG4111ZG1(ubiE/COQ5 methyltransferase family)	PF13649.6(Methyltransf_25:Methyltransferase domain); PF08241.12(Methyltransf_11:Methyltransferase domain); PF08242.12(Methyltransf_12:Methyltransferase domain); PF01209.18(Ubie_methyltran:ubiE/COQ5 methyltransferase family); PF13847.6(Methyltransf_31:Methyltransferase domain)	sp|Q4WQZ0|TPCH_ASPFU(Methyltransferase tpcH OS=Neosartorya fumigata (strain ATCC MYA-4609 / Af293 / CBS 101355 / FGSC A1100) OX=330879 GN=tpcH PE=2 SV=2)
26930	estExt_Genemark1.C_390033	expressed protein	815	3.47747	Up	2.0904e-51	ENOG410YE02(S:Function unknown)	ENOG410YE02(Citrinin biosynthesis oxydoreductase CtnB)	PF03959.13(FSH1:Serine hydrolase (FSH1))	sp|Q5AUY1|DBAE_EMENI(Esterase dbaE OS=Emericella nidulans (strain FGSC A4 / ATCC 38163 / CBS 112.46 / NRRL 194 / M139) OX=227321 GN=dbaE PE=2 SV=1)
89409	e_gw1.26.195.1	hypothetical protein	1395	3.47653	Up	1.19965e-16	ENOG4110WW0(S:Function unknown); ENOG4110XPZ(S:Function unknown)	ENOG4110WW0(BRLZ); ENOG4110XPZ(-)	PF00170.21(bZIP_1:bZIP transcription factor)
136460	estExt_fgenesh1_pm.C_40312	hypothetical protein	1181	3.47187	Up	1.40801e-05	ENOG4111FI3(G:Carbohydrate transport and metabolism)	ENOG4111FI3(glycoside hydrolase family 16 protein)	PF00722.21(Glyco_hydro_16:Glycosyl hydrolases family 16)	sp|D4AJR9|EGLX_ARTBC(Endo-1,3(4)-beta-glucanase ARB_04519 OS=Arthroderma benhamiae (strain ATCC MYA-4681 / CBS 112371) OX=663331 GN=ARB_04519 PE=3 SV=1)
99681	estExt_Genewise1Plus.C_10_t10343	hypothetical protein	1628	3.45644	Up	2.96644e-291	ENOG4112408(S:Function unknown)	ENOG4112408(phospholipid binding)	PF15410.6(PH_9:Pleckstrin homology domain)	sp|P53907|YNO4_YEAST(Uncharacterized protein YNL144C OS=Saccharomyces cerevisiae (strain ATCC 204508 / S288c) OX=559292 GN=YNL144C PE=1 SV=1)
12083	gm1.7639_g	General substrate transporter	1533	3.44846	Up	1.02372e-07	ENOG410XNQK(S:Function unknown)	ENOG410XNQK(-)	PF00083.24(Sugar_tr:Sugar (and other) transporter); PF07690.16(MFS_1:Major Facilitator Superfamily)	sp|P32466|HXT3_YEAST(Low-affinity glucose transporter HXT3 OS=Saccharomyces cerevisiae (strain ATCC 204508 / S288c) OX=559292 GN=HXT3 PE=1 SV=1)
116206	estExt_Genewise1.C_350065	FAD/NAD(P)-binding domain-containing protein	1369	3.44459	Up	2.99594e-54	COG0654(S:Function unknown)	COG0654(-)	PF01494.19(FAD_binding_3:FAD binding domain); PF01266.24(DAO:FAD dependent oxidoreductase); PF07992.14(Pyr_redox_2:Pyridine nucleotide-disulphide oxidoreductase); PF00070.27(Pyr_redox:Pyridine nucleotide-disulphide oxidoreductase); PF01262.21(AlaDh_PNT_C:Alanine dehydrogenase/PNT, C-terminal domain); PF13450.6(NAD_binding_8:NAD(P)-binding Rossmann-like domain)	sp|A0ST45|CTB7_CERNC(Monooxygenase CTB7 OS=Cercospora nicotianae OX=29003 GN=CTB7 PE=2 SV=1)
136272	estExt_fgenesh1_pm.C_3_t10381	MFS general substrate transporter	1866	3.44294	Up	2.20702e-22	COG0477(S:Function unknown)	COG0477(-)	PF07690.16(MFS_1:Major Facilitator Superfamily); PF00083.24(Sugar_tr:Sugar (and other) transporter)	sp|A0A0B5EMG9|FUB11_FUSOX(Efflux pump FUBT OS=Fusarium oxysporum OX=5507 GN=FUBT PE=1 SV=1)
74600	e_gw1.4.843.1	FAD-binding domain-containing protein	1251	3.43664	Up	1.86555e-07	COG0277(S:Function unknown)	COG0277(Phosphotransferase enzyme family)	PF01565.23(FAD_binding_4:FAD binding domain)	sp|A0ST43|CTB5_CERNC(FAD-dependent monooxygenase CTB5 OS=Cercospora nicotianae OX=29003 GN=CTB5 PE=2 SV=1)
73724	e_gw1.3.1459.1	P-loop containing nucleoside triphosphate hydrolase protein	2175	3.42458	Up	0	COG0542(S:Function unknown)	COG0542(peptidase')	PF07724.14(AAA_2:AAA domain (Cdc48 subfamily)); PF17871.1(AAA_lid_9:AAA lid domain); PF10431.9(ClpB_D2-small:C-terminal, D2-small domain, of ClpB protein); PF00004.29(AAA:ATPase family associated with various cellular activities (AAA)); PF07728.14(AAA_5:AAA domain (dynein-related subfamily)); PF13191.6(AAA_16:AAA ATPase domain); PF00158.26(Sigma54_activat:Sigma-54 interaction domain); PF05621.11(…	sp|O74402|HSP78_SCHPO(Heat shock protein 78, mitochondrial OS=Schizosaccharomyces pombe (strain 972 / ATCC 24843) OX=284812 GN=hsp78 PE=3 SV=1)
53261	gw1.4.642.1	hypothetical protein	1254	3.42196	Up	1.4212e-09	ENOG410YAXQ(S:Function unknown)	ENOG410YAXQ(-)	PF00172.18(Zn_clus:Fungal Zn(2)-Cys(6) binuclear cluster domain)	sp|Q12151|UPC2_YEAST(Sterol uptake control protein 2 OS=Saccharomyces cerevisiae (strain ATCC 204508 / S288c) OX=559292 GN=UPC2 PE=1 SV=1)
82104	e_gw1.12.6.1	multidrug resistance protein fnx1	1854	3.4199	Up	5.85616e-84	ENOG410XNQK(S:Function unknown); COG0419(S:Function unknown)	ENOG410XNQK(Pfam:RnaseH); COG0419(Pfam:RnaseH)	PF07690.16(MFS_1:Major Facilitator Superfamily); PF06609.13(TRI12:Fungal trichothecene efflux pump (TRI12)); PF00083.24(Sugar_tr:Sugar (and other) transporter)	sp|M2YI75|DOTC_DOTSN(Efflux pump dotC OS=Dothistroma septosporum (strain NZE10 / CBS 128990) OX=675120 GN=dotC PE=2 SV=1)
79636	e_gw1.9.227.1	alkaline phytoceramidase	915	3.40659	Up	4.62676e-103	ENOG4111RPN(U:Intracellular trafficking, secretion, and vesicular transport)	ENOG4111RPN(alkaline ceramidase)	PF05875.12(Ceramidase:Ceramidase)	sp|Q9D099|ACER3_MOUSE(Alkaline ceramidase 3 OS=Mus musculus OX=10090 GN=Acer3 PE=1 SV=1)
76748	e_gw1.6.1152.1	hypothetical protein	267	3.38947	Up	3.39226e-07	ENOG41124AP(S:Function unknown)	ENOG41124AP(-)	PF10281.9(Ish1:Putative stress-responsive nuclear envelope protein)
79014	e_gw1.8.775.1	hypothetical protein	2211	3.38109	Up	3.49138e-17	ENOG4110WHB(S:Function unknown)	ENOG4110WHB(-)	PF13086.6(AAA_11:AAA domain)
70641	e_gw1.2.541.1	expressed protein	969	3.37697	Up	0	ENOG411262C(K:Transcription)	ENOG411262C(Transcription factor)	PF00170.21(bZIP_1:bZIP transcription factor)	sp|A2R346|KAPC_ASPNC(Putative transcription factor kapC OS=Aspergillus niger (strain CBS 513.88 / FGSC A1513) OX=425011 GN=kapC PE=3 SV=2)
8746	gm1.4302_g	glutamate-cysteine ligase catalytic subunit	2157	3.343	Up	6.1252e-187	ENOG410XQIG(I:Lipid transport and metabolism)	ENOG410XQIG(glutamate-cysteine ligase activity)	PF03074.16(GCS:Glutamate-cysteine ligase)	sp|Q8X0X0|GSH1_NEUCR(Glutamate--cysteine ligase OS=Neurospora crassa (strain ATCC 24698 / 74-OR23-1A / CBS 708.71 / DSM 1257 / FGSC 987) OX=367110 GN=gcs-1 PE=3 SV=1)
77392	e_gw1.6.473.1	hypothetical protein	2484	3.33241	Up	1.51836e-77	COG0668(M:Cell wall/membrane/envelope biogenesis)	COG0668(Mechanosensitive ion channel)	PF00924.18(MS_channel:Mechanosensitive ion channel); PF13499.6(EF-hand_7:EF-hand domain pair); PF00036.32(EF-hand_1:EF hand)	sp|O74839|MSY1_SCHPO(Mechanosensitive ion channel protein Msy1 OS=Schizosaccharomyces pombe (strain 972 / ATCC 24843) OX=284812 GN=msy1 PE=1 SV=1)
83015	e_gw1.13.7.1	hypothetical protein	1122	3.32629	Up	6.15428e-07	ENOG4112CY3(S:Function unknown)	ENOG4112CY3(Conserved hypothetical, protein)
5778	gm1.1334_g	DUF427-domain containing protein	324	3.32225	Up	4.55492e-20	COG2343(J:Translation, ribosomal structure and biogenesis)	COG2343(Component of the eukaryotic translation initiation factor 3 (eIF-3) complex)	PF04248.12(NTP_transf_9:Domain of unknown function (DUF427))
128625	fgenesh1_pm.5_#_163	alpha/beta-Hydrolase	1581	3.31228	Up	8.51994e-05	COG2272(S:Function unknown)	COG2272(NADH-ubiquinone oxidoreductase 21 kDa subunit)	PF00135.28(COesterase:Carboxylesterase family); PF07859.13(Abhydrolase_3:alpha/beta hydrolase fold)	sp|D4B1N9|LIP3_ARTBC(Probable secreted lipase ARB_02369 OS=Arthroderma benhamiae (strain ATCC MYA-4681 / CBS 112371) OX=663331 GN=ARB_02369 PE=1 SV=1)
33711	fgenesh1_pg.4_#_58	aldo/keto reductase-like protein	1014	3.30986	Up	8.51994e-05	COG0667(C:Energy production and conversion)	COG0667(Aldo keto reductase)	PF00248.21(Aldo_ket_red:Aldo/keto reductase family)	sp|Q09923|YAKC_SCHPO(Aldo-keto reductase yakc [NADP(+)] OS=Schizosaccharomyces pombe (strain 972 / ATCC 24843) OX=284812 GN=yakc PE=1 SV=1)
82275	e_gw1.12.503.1	hypothetical protein	2376	3.29278	Up	8.51994e-05	ENOG410ZJRJ(S:Function unknown)	ENOG410ZJRJ(HET domain protein)
126422	fgenesh1_pm.1_#_836	hypothetical protein	1038	3.26214	Up	1.54776e-31	ENOG410YBQV(S:Function unknown)	ENOG410YBQV(-)		sp|G0LET6|BOA8_BOTFB(FAD-dependent monooxygenase BOA8 OS=Botryotinia fuckeliana (strain B05.10) OX=332648 GN=BOA8 PE=2 SV=1)
25812	estExt_Genemark1.C_160065	hypothetical protein	413	3.25927	Up	6.4161e-42	ENOG410Y3D7(S:Function unknown)	ENOG410Y3D7(-)	PF15055.6(DUF4536:Domain of unknown function (DUF4536))
132673	fgenesh1_pm.19_#_135	GroES-like protein	1179	3.24548	Up	1.00626e-11	COG0604(G:Carbohydrate transport and metabolism)	COG0604(glycoside hydrolase family 75 protein)	PF00107.26(ADH_zinc_N:Zinc-binding dehydrogenase); PF08240.12(ADH_N:Alcohol dehydrogenase GroES-like domain)	sp|D7UPN2|ACTS2_ALTAL(Trans-enoyl reductase ACTTS2 OS=Alternaria alternata OX=5599 GN=ACTTS2 PE=3 SV=1)
67788	e_gw1.1.409.1	hypothetical protein	837	3.23607	Up	2.01062e-06	ENOG41126T9(S:Function unknown)	ENOG41126T9(-)
57466	gw1.3.1053.1	hypothetical protein	1542	3.23068	Up	4.96042e-08	ENOG410YBCA(K:Transcription)	ENOG410YBCA(Transcription factor)	PF04082.18(Fungal_trans:Fungal specific transcription factor domain)	sp|P52959|CTF1B_FUSSO(Cutinase transcription factor 1 beta OS=Fusarium solani subsp. pisi OX=70791 GN=CTF1-BETA PE=2 SV=1)
143253	estExt_fgenesh1_pg.C_390016	Amidase	1986	3.21981	Up	2.74646e-18	COG0154(Q:Secondary metabolites biosynthesis, transport and catabolism)	COG0154(Cytochrome p450)	PF01425.21(Amidase:Amidase)	sp|P08158|AMDS_EMENI(Acetamidase OS=Emericella nidulans (strain FGSC A4 / ATCC 38163 / CBS 112.46 / NRRL 194 / M139) OX=227321 GN=amdS PE=2 SV=1)
99728	estExt_Genewise1Plus.C_10_t10436	hypothetical protein	1662	3.21698	Up	8.7265e-73	ENOG410XRTB(S:Function unknown)	ENOG410XRTB(conserved hypothetical protein)	PF00172.18(Zn_clus:Fungal Zn(2)-Cys(6) binuclear cluster domain)	sp|Q59QC7|UPC2_CANAL(Sterol uptake control protein 2 OS=Candida albicans (strain SC5314 / ATCC MYA-2876) OX=237561 GN=UPC2 PE=1 SV=1)
113520	estExt_Genewise1.C_17_t10069	oxidoreductase family protein	1261	3.20945	Up	1.25616e-09	COG0673(S:Function unknown)	COG0673(-)	PF01408.22(GFO_IDH_MocA:Oxidoreductase family, NAD-binding Rossmann fold)	sp|Q06433|GAL80_KLULA(Galactose/lactose metabolism regulatory protein GAL80 OS=Kluyveromyces lactis (strain ATCC 8585 / CBS 2359 / DSM 70799 / NBRC 1267 / NRRL Y-1140 / WM37) OX=284590 GN=GAL80 PE=1 SV=1)
70134	e_gw1.1.274.1	putative long-chain fatty acid transporter	1935	3.19212	Up	8.44018e-13	ENOG410XQ8T(I:Lipid transport and metabolism)	ENOG410XQ8T(Solute carrier family 27 (Fatty acid transporter), member)	PF00501.28(AMP-binding:AMP-binding enzyme); PF13193.6(AMP-binding_C:AMP-binding enzyme C-terminal domain)	sp|O42633|FAT1_COCHE(Fatty acid transporter protein OS=Cochliobolus heterostrophus OX=5016 GN=FAT1 PE=3 SV=1)
92414	e_gw1.39.74.1	3-isopropylmalate dehydrogenase	1143	3.18763	Up	1.25616e-09	COG0473(G:Carbohydrate transport and metabolism)	COG0473(Pantothenate transporter)	PF00180.20(Iso_dh:Isocitrate/isopropylmalate dehydrogenase)	sp|Q12545|LEU3_ACRCH(3-isopropylmalate dehydrogenase OS=Acremonium chrysogenum OX=5044 GN=LEU2 PE=3 SV=1)
34045	fgenesh1_pg.4_#_392	hypothetical protein	1188	3.18536	Up	3.61966e-06	ENOG410YI5Z(S:Function unknown)	ENOG410YI5Z(-)
70754	e_gw1.2.768.1	hypothetical protein	1404	3.1822	Up	3.61966e-06	ENOG410YH26(S:Function unknown); ENOG4111FYX(S:Function unknown)	ENOG410YH26(-); ENOG4111FYX(conserved hypothetical protein)
68234	e_gw1.1.1740.1	glutathione reductase	1410	3.18193	Up	0	COG1249(S:Function unknown)	COG1249(Zinc finger, HIT-type containing 6)	PF07992.14(Pyr_redox_2:Pyridine nucleotide-disulphide oxidoreductase); PF02852.22(Pyr_redox_dim:Pyridine nucleotide-disulphide oxidoreductase, dimerisation domain); PF00070.27(Pyr_redox:Pyridine nucleotide-disulphide oxidoreductase); PF13738.6(Pyr_redox_3:Pyridine nucleotide-disulphide oxidoreductase); PF13434.6(K_oxygenase:L-lysine 6-monooxygenase (NADPH-requiring)); PF12831.7(FAD_oxidored:FAD d…	sp|Q873E8|GSHR_NEUCR(Glutathione reductase OS=Neurospora crassa (strain ATCC 24698 / 74-OR23-1A / CBS 708.71 / DSM 1257 / FGSC 987) OX=367110 GN=gtr-1 PE=3 SV=1)
137520	estExt_fgenesh1_pm.C_100235	alpha/beta-Hydrolase	1412	3.16915	Up	3.35596e-40	COG0596(S:Function unknown)	COG0596(Alpha beta hydrolase)	PF06441.12(EHN:Epoxide hydrolase N terminus); PF00561.20(Abhydrolase_1:alpha/beta hydrolase fold)	sp|Q06816|HYEP_STIAD(Putative epoxide hydrolase OS=Stigmatella aurantiaca (strain DW4/3-1) OX=378806 GN=STAUR_4299 PE=3 SV=2)
78645	e_gw1.7.9.1	hypothetical protein	4311	3.1684	Up	0	COG0842(S:Function unknown)	COG0842(Conserved hypothetical, protein)	PF01061.24(ABC2_membrane:ABC-2 type transporter); PF00005.27(ABC_tran:ABC transporter); PF06422.12(PDR_CDR:CDR ABC transporter); PF14510.6(ABC_trans_N:ABC-transporter N-terminal); PF13191.6(AAA_16:AAA ATPase domain); PF13555.6(AAA_29:P-loop containing region of AAA domain); PF13481.6(AAA_25:AAA domain); PF12698.7(ABC2_membrane_3:ABC-2 family transporter protein); PF03193.16(RsgA_GTPase:RsgA GTPas…	sp|Q4WDD4|ATRF_ASPFU(ABC multidrug transporter atrF OS=Neosartorya fumigata (strain ATCC MYA-4609 / Af293 / CBS 101355 / FGSC A1100) OX=330879 GN=atrF PE=2 SV=1)
103154	estExt_Genewise1Plus.C_230020	SCO1 protein	961	3.16685	Up	0	COG1999(S:Function unknown)	COG1999(Electron transport protein SCO1 SenC)	PF02630.14(SCO1-SenC:SCO1/SenC)	sp|P23833|SCO1_YEAST(Protein SCO1, mitochondrial OS=Saccharomyces cerevisiae (strain ATCC 204508 / S288c) OX=559292 GN=SCO1 PE=1 SV=1)
39277	fgenesh1_pg.31_#_61	Alpha-galactosidase 3	1875	3.16055	Up	5.02572e-83	ENOG410Y110(G:Carbohydrate transport and metabolism)	ENOG410Y110(glycoside hydrolase family 27)	PF16499.5(Melibiase_2:Alpha galactosidase A); PF17801.1(Melibiase_C:Alpha galactosidase C-terminal beta sandwich domain)	sp|Q92451|AGAL3_HYPJE(Alpha-galactosidase 3 OS=Hypocrea jecorina OX=51453 GN=agl3 PE=1 SV=1)
127055	fgenesh1_pm.2_#_380	MFS general substrate transporter	1401	3.16046	Up	0.00027801	COG0477(S:Function unknown)	COG0477(ER membrane protein complex subunit 4)	PF07690.16(MFS_1:Major Facilitator Superfamily); PF00083.24(Sugar_tr:Sugar (and other) transporter)	sp|A0A0U2UXG3|ITP1_USTMD(Itaconate transport protein OS=Ustilago maydis OX=5270 GN=ITP1 PE=3 SV=1)
10353	gm1.5909_g	GroES-like protein	1209	3.15381	Up	0.00027801	COG1063(S:Function unknown)	COG1063(Fungal Zn(2)-Cys(6) binuclear cluster domain)	PF08240.12(ADH_N:Alcohol dehydrogenase GroES-like domain); PF00107.26(ADH_zinc_N:Zinc-binding dehydrogenase)	sp|C5J3R8|LAD_TALEM(L-arabinitol 4-dehydrogenase OS=Talaromyces emersonii OX=68825 GN=lad PE=1 SV=1)
73946	e_gw1.4.971.1	hypothetical protein	1341	3.14296	Up	0.00027801	ENOG410YE45(S:Function unknown); ENOG4110KAH(S:Function unknown)	ENOG410YE45(Fungal specific transcription factor domain); ENOG4110KAH(Transcription factor)	PF04082.18(Fungal_trans:Fungal specific transcription factor domain); PF00172.18(Zn_clus:Fungal Zn(2)-Cys(6) binuclear cluster domain)
131079	fgenesh1_pm.12_#_121	GroES-like protein	1143	3.13965	Up	4.99114e-17	ENOG4111F5D(S:Function unknown)	ENOG4111F5D(Conserved hypothetical, protein)		sp|B1GVX6|BOA5_BOTFB(Trans-enoyl reductase BOA5 OS=Botryotinia fuckeliana (strain B05.10) OX=332648 GN=BOA5 PE=2 SV=1)
7623	gm1.3179_g	hexose transporter-like protein	1620	3.1383	Up	9.4799e-88	ENOG410XNQK(C:Energy production and conversion)	ENOG410XNQK(Catalyzes the 1,3-allylic rearrangement of the homoallylic substrate isopentenyl (IPP) to its allylic isomer, dimethylallyl diphosphate (DMAPP) (By similarity))	PF00083.24(Sugar_tr:Sugar (and other) transporter); PF07690.16(MFS_1:Major Facilitator Superfamily)	sp|P32465|HXT1_YEAST(Low-affinity glucose transporter HXT1 OS=Saccharomyces cerevisiae (strain ATCC 204508 / S288c) OX=559292 GN=HXT1 PE=1 SV=1)
96955	estExt_Genewise1Plus.C_4_t20190	Cu%2CZn superoxide dismutase-like protein	1138	3.12793	Up	1.30999e-259	COG2608(S:Function unknown)	COG2608(heavy metal transport detoxification protein)	PF00403.26(HMA:Heavy-metal-associated domain); PF00080.20(Sod_Cu:Copper/zinc superoxide dismutase (SODC))	sp|Q6BZU2|CCS1_YARLI(Superoxide dismutase 1 copper chaperone OS=Yarrowia lipolytica (strain CLIB 122 / E 150) OX=284591 GN=CCS1 PE=3 SV=1)
70029	e_gw1.1.849.1	expressed protein	717	3.12446	Up	0	ENOG4111X5Y(S:Function unknown)	ENOG4111X5Y(Conserved hypothetical, protein)
134945	fgenesh1_pm.43_#_21	structural comparison of Two major endo-1%2C4-beta-Xylanases from Trichodrema Reesei	594	3.12154	Up	1.68508e-211	ENOG4111ZP8(G:Carbohydrate transport and metabolism); ENOG410YF2E(G:Carbohydrate transport and metabolism)	ENOG4111ZP8(Endo-14-beta-xylanase); ENOG410YF2E(Glycosyl hydrolases family 11)	PF00457.17(Glyco_hydro_11:Glycosyl hydrolases family 11)	sp|G0R947|XYN1_HYPJQ(Endo-1,4-beta-xylanase 1 OS=Hypocrea jecorina (strain QM6a) OX=431241 GN=TRIREDRAFT_74223 PE=1 SV=1)
134041	fgenesh1_pm.28_#_113	alpha/beta-Hydrolase	846	3.11548	Up	0.00027801	COG0400(S:Function unknown)	COG0400(LCCL domain protein)	PF02230.16(Abhydrolase_2:Phospholipase/Carboxylesterase)	sp|O14304|YE88_SCHPO(Uncharacterized hydrolase C9G1.08c OS=Schizosaccharomyces pombe (strain 972 / ATCC 24843) OX=284812 GN=SPAC9G1.08c PE=3 SV=1)
79781	e_gw1.9.535.1	hypothetical protein	1563	3.10852	Up	5.06854e-273	ENOG4111RRJ(S:Function unknown)	ENOG4111RRJ(UBX domain protein)	PF11470.8(TUG-UBL1:TUG ubiquitin-like domain); PF02196.15(RBD:Raf-like Ras-binding domain)	sp|Q8VBT9|ASPC1_MOUSE(Tether containing UBX domain for GLUT4 OS=Mus musculus OX=10090 GN=Aspscr1 PE=1 SV=1)
128107	fgenesh1_pm.4_#_104	hypothetical protein	1095	3.10553	Up	7.18132e-09	ENOG410XT93(S:Function unknown)	ENOG410XT93(-)	PF11951.8(Fungal_trans_2:Fungal specific transcription factor domain)
71426	e_gw1.2.353.1	putative MFS transporter	1569	3.10265	Up	8.0132e-29	COG0477(S:Function unknown)	COG0477(Protein of unknown function (DUF3405))	PF07690.16(MFS_1:Major Facilitator Superfamily); PF03137.20(OATP:Organic Anion Transporter Polypeptide (OATP) family)	sp|A0A0U2UXG3|ITP1_USTMD(Itaconate transport protein OS=Ustilago maydis OX=5270 GN=ITP1 PE=3 SV=1)
26543	estExt_Genemark1.C_270027	hypothetical protein	1958	3.09913	Up	0	ENOG410Y8MJ(S:Function unknown)	ENOG410Y8MJ(alpha/beta hydrolase fold)	PF01490.18(Aa_trans:Transmembrane amino acid transporter protein)	sp|P38680|MTR_NEUCR(N amino acid transport system protein OS=Neurospora crassa (strain ATCC 24698 / 74-OR23-1A / CBS 708.71 / DSM 1257 / FGSC 987) OX=367110 GN=mtr PE=3 SV=2)
70294	e_gw1.2.220.1	glutathione synthetase	1551	3.09398	Up	5.17678e-39	ENOG410XPHH(I:Lipid transport and metabolism)	ENOG410XPHH(glutathione synthetase)	PF03917.17(GSH_synth_ATP:Eukaryotic glutathione synthase, ATP binding domain); PF03199.15(GSH_synthase:Eukaryotic glutathione synthase)	sp|P35669|GSHB_SCHPO(Glutathione synthetase large chain OS=Schizosaccharomyces pombe (strain 972 / ATCC 24843) OX=284812 GN=gsa1 PE=1 SV=2)
8126	gm1.3682_g	hypothetical protein	1020	3.09217	Up	1.16275e-05	COG4295(S:Function unknown)	COG4295(conserved hypothetical protein)	PF10021.9(DUF2263:Uncharacterized protein conserved in bacteria (DUF2263))
133245	fgenesh1_pm.23_#_6	HAD-superfamily hydrolase	1350	3.08398	Up	1.22176e-29	COG0647(T:Signal transduction mechanisms)	COG0647(NIMA-related kinase)	PF13344.6(Hydrolase_6:Haloacid dehalogenase-like hydrolase); PF13242.6(Hydrolase_like:HAD-hyrolase-like); PF00702.26(Hydrolase:haloacid dehalogenase-like hydrolase)	sp|P36151|YK50_YEAST(Uncharacterized protein YKR070W OS=Saccharomyces cerevisiae (strain ATCC 204508 / S288c) OX=559292 GN=YKR070W PE=1 SV=1)
130940	fgenesh1_pm.11_#_273	hypothetical protein	2730	3.08092	Up	1.16275e-05	COG0323(S:Function unknown)	COG0323(integral membrane protein)	PF13589.6(HATPase_c_3:Histidine kinase-, DNA gyrase B-, and HSP90-like ATPase); PF01119.19(DNA_mis_repair:DNA mismatch repair protein, C-terminal domain); PF02518.26(HATPase_c:Histidine kinase-, DNA gyrase B-, and HSP90-like ATPase)	sp|P54277|PMS1_HUMAN(PMS1 protein homolog 1 OS=Homo sapiens OX=9606 GN=PMS1 PE=1 SV=1)
67036	gw1.8.865.1	Aquaporin-like protein	699	3.07325	Up	0.000499082	COG0580(S:Function unknown)	COG0580(-)	PF00230.20(MIP:Major intrinsic protein)	sp|P0CD89|AQY2_YEASX(Aquaporin-2 OS=Saccharomyces cerevisiae OX=4932 GN=AQY2 PE=2 SV=1)
67125	gw1.17.569.1	hypothetical protein	1713	3.07068	Up	2.6084e-51	ENOG410Y9FT(K:Transcription)	ENOG410Y9FT(Fungal specific transcription factor domain)	PF04082.18(Fungal_trans:Fungal specific transcription factor domain); PF00172.18(Zn_clus:Fungal Zn(2)-Cys(6) binuclear cluster domain)	sp|B8N0F0|ASAR_ASPFN(C6 transcription factor asaR OS=Aspergillus flavus (strain ATCC 200026 / FGSC A1120 / NRRL 3357 / JCM 12722 / SRRC 167) OX=332952 GN=asaR PE=2 SV=1)
24302	estExt_Genemark1.C_40417	expressed protein	2598	3.0677	Up	1.8739e-99	ENOG410XS9R(S:Function unknown)	ENOG410XS9R(SAM and PH)	PF07647.17(SAM_2:SAM domain (Sterile alpha motif)); PF00169.29(PH:PH domain)	sp|P38041|BOB1_YEAST(Protein BOB1 OS=Saccharomyces cerevisiae (strain ATCC 204508 / S288c) OX=559292 GN=BOI1 PE=1 SV=1)
121008	fgenesh2_kg.32_#_1_#_gi|38136813|gb|CF882131.1|CF882131	expressed protein	411	3.06674	Up	0.000499082	COG0420(L:Replication, recombination and repair)	COG0420(Exonuclease)
88468	e_gw1.23.82.1	HET-domain containing protein	2046	3.06386	Up	8.83586e-16	ENOG4110WQB(S:Function unknown); ENOG4110WQH(S:Function unknown); ENOG4111RFS(S:Function unknown)	ENOG4110WQB(Heterokaryon incompatibility protein (HET)); ENOG4110WQH(Heterokaryon incompatibility protein (HET)); ENOG4111RFS(Heterokaryon incompatibility protein (HET))	PF06985.11(HET:Heterokaryon incompatibility protein (HET))
130711	fgenesh1_pm.11_#_44	hypothetical protein	507	3.06151	Up	2.36424e-17	ENOG410YTAC(S:Function unknown)	ENOG410YTAC(Membrane-associating domain)	PF01284.23(MARVEL:Membrane-associating domain)
129025	fgenesh1_pm.6_#_159	hypothetical protein	1422	3.05445	Up	1.16275e-05	ENOG410YBZX(S:Function unknown); ENOG410ZM3K(S:Function unknown)	ENOG410YBZX(Transferase family); ENOG410ZM3K(Transferase family)	PF02458.15(Transferase:Transferase family)	sp|C8VPT2|EASC_EMENI(Acyltransferase easC OS=Emericella nidulans (strain FGSC A4 / ATCC 38163 / CBS 112.46 / NRRL 194 / M139) OX=227321 GN=easC PE=3 SV=1)
24135	estExt_Genemark1.C_40033	hypothetical protein	3207	3.04399	Up	5.6931e-84	ENOG410YA5R(S:Function unknown); COG1064(C:Energy production and conversion); ENOG4111KSU(S:Function unknown)	ENOG410YA5R(Fungal_trans); COG1064(alcohol dehydrogenase); ENOG4111KSU(Fungal specific transcription factor domain)	PF04082.18(Fungal_trans:Fungal specific transcription factor domain); PF08240.12(ADH_N:Alcohol dehydrogenase GroES-like domain); PF00107.26(ADH_zinc_N:Zinc-binding dehydrogenase); PF01262.21(AlaDh_PNT_C:Alanine dehydrogenase/PNT, C-terminal domain); PF02826.19(2-Hacid_dh_C:D-isomer specific 2-hydroxyacid dehydrogenase, NAD binding domain)	sp|C0SPA5|ADHA_BACSU(Probable formaldehyde dehydrogenase AdhA OS=Bacillus subtilis (strain 168) OX=224308 GN=adhA PE=2 SV=1)
5387	gm1.943_g	putative MFS multidrug transporter	1821	3.04203	Up	2.79808e-85	COG0477(S:Function unknown)	COG0477(-)	PF07690.16(MFS_1:Major Facilitator Superfamily)	sp|Q59RG0|NAG4_CANAL(Major facilitator superfamily multidrug transporter NAG4 OS=Candida albicans (strain SC5314 / ATCC MYA-2876) OX=237561 GN=NAG4 PE=2 SV=1)
78912	e_gw1.8.559.1	hypothetical protein	696	3.03847	Up	0.000499082	ENOG410XVJH(K:Transcription)	ENOG410XVJH(transcription from RNA polymerase I promoter)	PF11781.8(zf-RRN7:Zinc-finger of RNA-polymerase I-specific TFIIB, Rrn7)	sp|Q9UST5|RRN7_SCHPO(RNA polymerase I-specific transcription initiation factor rrn7 OS=Schizosaccharomyces pombe (strain 972 / ATCC 24843) OX=284812 GN=rrn7 PE=1 SV=1)
13299	gm1.8855_g	Taurine catabolism dioxygenase TauD/TfdA	1137	3.02438	Up	0.000499082	COG2175(Q:Secondary metabolites biosynthesis, transport and catabolism)	COG2175(dioxygenase)	PF02668.16(TauD:Taurine catabolism dioxygenase TauD, TfdA family)	sp|P37610|TAUD_ECOLI(Alpha-ketoglutarate-dependent taurine dioxygenase OS=Escherichia coli (strain K12) OX=83333 GN=tauD PE=1 SV=3)
95756	estExt_Genewise1Plus.C_2_t30371	3-oxoacyl-[acyl-carrier-protein] synth	1359	3.01923	Up	5.42768e-143	COG0304(I:Lipid transport and metabolism)	COG0304(Catalyzes the condensation reaction of fatty acid synthesis by the addition to an acyl acceptor of two carbons from malonyl-ACP (By similarity))	PF00109.26(ketoacyl-synt:Beta-ketoacyl synthase, N-terminal domain); PF02801.22(Ketoacyl-synt_C:Beta-ketoacyl synthase, C-terminal domain); PF00108.23(Thiolase_N:Thiolase, N-terminal domain); PF02803.18(Thiolase_C:Thiolase, C-terminal domain)	sp|P56902|FABF_RHIME(3-oxoacyl-[acyl-carrier-protein] synthase 2 OS=Rhizobium meliloti (strain 1021) OX=266834 GN=fabF PE=3 SV=2)
127083	fgenesh1_pm.2_#_408	hypothetical protein	3513	3.01078	Up	6.77956e-22	ENOG410XR8V(K:Transcription)	ENOG410XR8V(Suppressor of Ty 3 homolog (S. cerevisiae))	PF13515.6(FUSC_2:Fusaric acid resistance protein-like); PF10337.9(ArAE_2_N:Putative ER transporter, 6TM, N-terminal); PF10334.9(ArAE_2:Aromatic acid exporter family member 2); PF11744.8(ALMT:Aluminium activated malate transporter)	sp|P53120|YGO0_YEAST(Uncharacterized membrane protein YGL140C OS=Saccharomyces cerevisiae (strain ATCC 204508 / S288c) OX=559292 GN=YGL140C PE=1 SV=1)
125216	estExt_fgenesh2_kg.C_310023	Thioredoxin-like protein	720	3.00533	Up	0	ENOG410YQ2G(S:Function unknown)	ENOG410YQ2G(-)	PF00085.20(Thioredoxin:Thioredoxin); PF04756.13(OST3_OST6:OST3 / OST6 family, transporter family); PF13098.6(Thioredoxin_2:Thioredoxin-like domain); PF13905.6(Thioredoxin_8:Thioredoxin-like); PF13728.6(TraF:F plasmid transfer operon protein); PF00578.21(AhpC-TSA:AhpC/TSA family)	sp|Q8TFM8|THIO_FUSCU(Thioredoxin-like protein OS=Fusarium culmorum OX=5516 PE=1 SV=1)
9970	gm1.5526_g	glutathione S-transferase II	795	3.00044	Up	3.54502e-72	COG0625(S:Function unknown)	COG0625(Conserved hypothetical, protein)	PF02798.20(GST_N:Glutathione S-transferase, N-terminal domain); PF00043.25(GST_C:Glutathione S-transferase, C-terminal domain); PF13409.6(GST_N_2:Glutathione S-transferase, N-terminal domain); PF14497.6(GST_C_3:Glutathione S-transferase, C-terminal domain); PF13417.6(GST_N_3:Glutathione S-transferase, N-terminal domain); PF13410.6(GST_C_2:Glutathione S-transferase, C-terminal domain)	sp|Q0CCY0|GEDE_ASPTN(Glutathione S-transferase-like protein gedE OS=Aspergillus terreus (strain NIH 2624 / FGSC A1156) OX=341663 GN=gedE PE=1 SV=1)
8633	gm1.4189_g	OPT superfamily Oligopeptide transporter	2145	2.99918	Up	1.07316e-161	COG1297(S:Function unknown)	COG1297(oligo-peptide transporter)	PF03169.15(OPT:OPT oligopeptide transporter protein)	sp|P53134|YGL4_YEAST(Putative oligopeptide transporter YGL114W OS=Saccharomyces cerevisiae (strain ATCC 204508 / S288c) OX=559292 GN=YGL114W PE=1 SV=1)
23472	estExt_Genemark1.C_1_t20333	minor allergen Alt a 7	670	2.99749	Up	3.94e-88	COG0655(S:Function unknown)	COG0655(Nadph-dependent fmn reductase)	PF03358.15(FMN_red:NADPH-dependent FMN reductase); PF02525.17(Flavodoxin_2:Flavodoxin-like fold); PF00258.25(Flavodoxin_1:Flavodoxin)	sp|P42058|ALTA7_ALTAL(Minor allergen Alt a 7 OS=Alternaria alternata OX=5599 GN=ALTA7 PE=1 SV=1)
86755	e_gw1.19.507.1	MFS general substrate transporter	1386	2.99573	Up	8.41594e-41	COG0477(S:Function unknown); ENOG4110PC4(G:Carbohydrate transport and metabolism); ENOG410ZVRQ(G:Carbohydrate transport and metabolism); ENOG410XRM2(G:Carbohydrate transport and metabolism)	COG0477(Fungal specific transcription factor domain); ENOG4110PC4(Monocarboxylate transporter); ENOG410ZVRQ(Major Facilitator Superfamily); ENOG410XRM2(major facilitator superfamily)	PF07690.16(MFS_1:Major Facilitator Superfamily)	sp|P53918|ESBP6_YEAST(Uncharacterized transporter ESBP6 OS=Saccharomyces cerevisiae (strain ATCC 204508 / S288c) OX=559292 GN=ESBP6 PE=1 SV=1)
33174	fgenesh1_pg.3_#_52	sulfate permease	2514	2.99417	Up	2.96338e-19	COG0659(U:Intracellular trafficking, secretion, and vesicular transport)	COG0659(Tho complex)	PF00916.20(Sulfate_transp:Sulfate permease family); PF01740.21(STAS:STAS domain)	sp|P23622|CYS14_NEUCR(Sulfate permease 2 OS=Neurospora crassa (strain ATCC 24698 / 74-OR23-1A / CBS 708.71 / DSM 1257 / FGSC 987) OX=367110 GN=cys-14 PE=2 SV=3)
77001	e_gw1.6.1154.1	hypothetical protein	2262	2.99208	Up	1.28849e-36	ENOG41108XI(S:Function unknown)	ENOG41108XI(Conserved hypothetical, protein)	PF11951.8(Fungal_trans_2:Fungal specific transcription factor domain); PF00172.18(Zn_clus:Fungal Zn(2)-Cys(6) binuclear cluster domain)
38418	fgenesh1_pg.24_#_2	endo beta-1%2C4-xylanase:ISOTYPE%3D2	690	2.98697	Up	0	ENOG4111ZP8(G:Carbohydrate transport and metabolism); ENOG410YF2E(G:Carbohydrate transport and metabolism)	ENOG4111ZP8(Endo-14-beta-xylanase); ENOG410YF2E(Glycosyl hydrolases family 11)	PF00457.17(Glyco_hydro_11:Glycosyl hydrolases family 11)	sp|G0R947|XYN1_HYPJQ(Endo-1,4-beta-xylanase 1 OS=Hypocrea jecorina (strain QM6a) OX=431241 GN=TRIREDRAFT_74223 PE=1 SV=1)
131550	fgenesh1_pm.14_#_110	NAD(P)-binding protein	1011	2.98673	Up	2.54176e-91	COG0604(C:Energy production and conversion)	COG0604(Manganese-dependent inorganic pyrophosphatase)	PF00107.26(ADH_zinc_N:Zinc-binding dehydrogenase); PF13602.6(ADH_zinc_N_2:Zinc-binding dehydrogenase); PF08240.12(ADH_N:Alcohol dehydrogenase GroES-like domain); PF16884.5(ADH_N_2:N-terminal domain of oxidoreductase)	sp|P38230|QOR_YEAST(Probable quinone oxidoreductase OS=Saccharomyces cerevisiae (strain ATCC 204508 / S288c) OX=559292 GN=ZTA1 PE=1 SV=1)
61240	gw1.9.696.1	hypothetical protein	1542	2.98244	Up	1.59877e-06	ENOG410Y9E6(S:Function unknown)	ENOG410Y9E6(LipA and NB-ARC domain protein)	PF01687.17(Flavokinase:Riboflavin kinase)	sp|A4QQ05|RIFK_MAGO7(Riboflavin kinase OS=Magnaporthe oryzae (strain 70-15 / ATCC MYA-4617 / FGSC 8958) OX=242507 GN=FMN1 PE=3 SV=3)
12816	gm1.8372_g	FAD/NAD(P)-binding domain-containing protein	1491	2.97645	Up	5.58806e-105	COG1252(P:Inorganic ion transport and metabolism)	COG1252(zinc transporter)	PF07992.14(Pyr_redox_2:Pyridine nucleotide-disulphide oxidoreductase); PF00070.27(Pyr_redox:Pyridine nucleotide-disulphide oxidoreductase)	sp|Q55CD9|NDH_DICDI(Probable NADH dehydrogenase OS=Dictyostelium discoideum OX=44689 GN=DDB_G0270104 PE=3 SV=2)
76361	e_gw1.6.1263.1	TfdA family taurine catabolism dioxygenase TauD	1230	2.97306	Up	2.29962e-153	ENOG410Z63W(Q:Secondary metabolites biosynthesis, transport and catabolism)	ENOG410Z63W(Taurine catabolism dioxygenase, TauD)	PF02668.16(TauD:Taurine catabolism dioxygenase TauD, TfdA family)	sp|A0A084AFG6|SAT17_STACB(Taurine hydroxylase-like protein SAT17 OS=Stachybotrys chartarum (strain CBS 109288 / IBT 7711) OX=1280523 GN=SAT17 PE=4 SV=1)
40695	gw1.1.67.1	hypothetical protein	510	2.9698	Up	1.48832e-10	ENOG410YBPM(S:Function unknown); ENOG4110VIE(S:Function unknown)	ENOG410YBPM(Conserved hypothetical, protein); ENOG4110VIE(-)
96404	estExt_Genewise1Plus.C_3_t20263	mitochondrial carrier protein	1108	2.96786	Up	2.67372e-88	ENOG410Z50X(S:Function unknown)	ENOG410Z50X(Mitochondrial carrier protein)	PF00153.27(Mito_carr:Mitochondrial carrier protein)
130751	fgenesh1_pm.11_#_84	MFS general substrate transporter	1671	2.96479	Up	5.45928e-109	ENOG4110RCS(S:Function unknown); ENOG410XSE0(S:Function unknown)	ENOG4110RCS(-); ENOG410XSE0(-)	PF07690.16(MFS_1:Major Facilitator Superfamily); PF00083.24(Sugar_tr:Sugar (and other) transporter)	sp|Q4WRQ4|MFSB_ASPFU(Major facilitator superfamily multidrug transporter mfsB OS=Neosartorya fumigata (strain ATCC MYA-4609 / Af293 / CBS 101355 / FGSC A1100) OX=330879 GN=mfsB PE=2 SV=1)
141597	estExt_fgenesh1_pg.C_100197	IQ calmodulin-binding motif protein	2130	2.96321	Up	0	ENOG41116GE(S:Function unknown)	ENOG41116GE(motif protein)	PF13091.6(PLDc_2:PLD-like domain); PF00614.22(PLDc:Phospholipase D Active site motif)
84514	e_gw1.15.301.1	chlorophenol O-methyltransferase	1353	2.96237	Up	2.57582e-55	ENOG410XS7T(S:Function unknown)	ENOG410XS7T(-)	PF00891.18(Methyltransf_2:O-methyltransferase domain); PF13489.6(Methyltransf_23:Methyltransferase domain)	sp|D3H5H5|CMT1_TRILO(Chlorophenol O-methyltransferase OS=Trichoderma longibrachiatum OX=5548 GN=cmt1 PE=1 SV=1)
6724	gm1.2280_g	S-adenosyl-L-methionine-dependent methyltransferase	858	2.95842	Up	3.68628e-05	ENOG4111695(S:Function unknown); COG2227(H:Coenzyme transport and metabolism)	ENOG4111695(Methyltransferase domain); COG2227(Non-specific O-methyltransferase that catalyzes the 2 O- methylation steps in the ubiquinone biosynthetic pathway (By similarity))	PF13489.6(Methyltransf_23:Methyltransferase domain); PF13847.6(Methyltransf_31:Methyltransferase domain); PF08242.12(Methyltransf_12:Methyltransferase domain); PF08241.12(Methyltransf_11:Methyltransferase domain); PF13649.6(Methyltransf_25:Methyltransferase domain); PF01209.18(Ubie_methyltran:ubiE/COQ5 methyltransferase family)	sp|O94628|YGE9_SCHPO(Uncharacterized methyltransferase C1347.09 OS=Schizosaccharomyces pombe (strain 972 / ATCC 24843) OX=284812 GN=SPBC1347.09 PE=3 SV=1)
75476	e_gw1.5.697.1	Acyl-CoA N-acyltransferase	687	2.95591	Up	3.47602e-26	ENOG410Y2IZ(S:Function unknown); ENOG41116NK(S:Function unknown)	ENOG410Y2IZ(-); ENOG41116NK(-)	PF13302.7(Acetyltransf_3:Acetyltransferase (GNAT) domain)
25542	estExt_Genemark1.C_130146	hypothetical protein	3085	2.92708	Up	1.63946e-82	ENOG410XNPT(S:Function unknown)	ENOG410XNPT(-)	PF15979.5(Glyco_hydro_115:Glycosyl hydrolase family 115); PF17829.1(GH115_C:Gylcosyl hydrolase family 115 C-terminal domain); PF05124.12(S_layer_C:S-layer like family, C-terminal region)
71703	e_gw1.2.1055.1	Aminomethyltransferase folate-binding domain-containing protein	1206	2.90674	Up	6.93448e-77	COG0354(S:Function unknown)	COG0354(Folate-binding protein involved in regulating the level of ATP-DnaA and in the modification of some tRNAs. It is probably a key factor in regulatory networks that act via tRNA modification, such as initiation of chromosomal replication (By similarity))	PF01571.21(GCV_T:Aminomethyltransferase folate-binding domain)	sp|A4R8F9|CAF17_MAGO7(Putative transferase CAF17, mitochondrial OS=Magnaporthe oryzae (strain 70-15 / ATCC MYA-4617 / FGSC 8958) OX=242507 GN=CAF17 PE=3 SV=1)
33973	fgenesh1_pg.4_#_320	hypothetical protein	1833	2.90498	Up	5.50732e-30	ENOG410Y354(S:Function unknown)	ENOG410Y354(Conserved hypothetical, protein)
72828	e_gw1.3.216.1	NAD(P)-binding protein	801	2.90417	Up	9.34838e-35	COG0702(S:Function unknown)	COG0702(Slime mold cyclic AMP receptor)	PF13460.6(NAD_binding_10:NAD(P)H-binding); PF01370.21(Epimerase:NAD dependent epimerase/dehydratase family)	sp|Q9Y7K0|YGL3_SCHPO(UPF0659 protein C216.03 OS=Schizosaccharomyces pombe (strain 972 / ATCC 24843) OX=284812 GN=SPBC216.03 PE=3 SV=1)
76562	e_gw1.6.650.1	hexose transporter	1374	2.90304	Up	2.48358e-22	ENOG410XNQK(J:Translation, ribosomal structure and biogenesis)	ENOG410XNQK(One of the primary rRNA binding proteins, this protein initially binds near the 5'-end of the 23S rRNA. It is important during the early stages of 50S assembly. It makes multiple contacts with different domains of the 23S rRNA in the assembled 50S subunit and ribosome (By similarity))	PF00083.24(Sugar_tr:Sugar (and other) transporter); PF07690.16(MFS_1:Major Facilitator Superfamily)	sp|P49374|HGT1_KLULA(High-affinity glucose transporter OS=Kluyveromyces lactis (strain ATCC 8585 / CBS 2359 / DSM 70799 / NBRC 1267 / NRRL Y-1140 / WM37) OX=284590 GN=HGT1 PE=3 SV=1)
8569	gm1.4125_g	meiotic chromosome segregation protein	918	2.90154	Up	3.75412e-11	COG3665(S:Function unknown)	COG3665(Urea carboxylase-associated protein)	PF09347.10(DUF1989:Domain of unknown function (DUF1989))	sp|Q10082|YAO3_SCHPO(Uncharacterized protein C11D3.03c OS=Schizosaccharomyces pombe (strain 972 / ATCC 24843) OX=284812 GN=SPAC11D3.03c PE=4 SV=1)
6037	gm1.1593_g	ChaC-domain containing protein	603	2.89127	Up	1.07792e-19	COG3703(P:Inorganic ion transport and metabolism)	COG3703(cation transport)	PF04752.12(ChaC:ChaC-like protein)	sp|Q4KMJ1|CHAC2_DANRE(Putative glutathione-specific gamma-glutamylcyclotransferase 2 OS=Danio rerio OX=7955 GN=chac2 PE=2 SV=1)
96174	estExt_Genewise1Plus.C_3_t10213	Rotamase PTPA-2	1377	2.88688	Up	1.11755e-300	COG5057(S:Function unknown)	COG5057(-)	PF03095.15(PTPA:Phosphotyrosyl phosphate activator (PTPA) protein)	sp|Q4INW6|PTPA2_GIBZE(Serine/threonine-protein phosphatase 2A activator 2 OS=Gibberella zeae (strain PH-1 / ATCC MYA-4620 / FGSC 9075 / NRRL 31084) OX=229533 GN=RRD2 PE=3 SV=2)
136933	estExt_fgenesh1_pm.C_70111	hypothetical protein	1546	2.8844	Up	9.03854e-21
115863	estExt_Genewise1.C_300123	alpha-ketoglutarate-dependent taurine dioxygenase	1224	2.88102	Up	5.13248e-76	COG2175(U:Intracellular trafficking, secretion, and vesicular transport)	COG2175(Major Facilitator Superfamily)	PF02668.16(TauD:Taurine catabolism dioxygenase TauD, TfdA family)	sp|Q12358|JLP1_YEAST(Alpha-ketoglutarate-dependent sulfonate dioxygenase OS=Saccharomyces cerevisiae (strain ATCC 204508 / S288c) OX=559292 GN=JLP1 PE=1 SV=1)
134241	fgenesh1_pm.30_#_78	hypothetical protein	2073	2.87732	Up	4.97628e-06	ENOG410YA51(K:Transcription)	ENOG410YA51(Transcription factor)	PF04082.18(Fungal_trans:Fungal specific transcription factor domain); PF00172.18(Zn_clus:Fungal Zn(2)-Cys(6) binuclear cluster domain)
86893	e_gw1.20.82.1	FAD/NAD(P)-binding domain-containing protein	1257	2.87312	Up	3.05626e-37	COG0654(S:Function unknown)	COG0654(Actin-interacting protein)	PF01494.19(FAD_binding_3:FAD binding domain); PF08491.10(SE:Squalene epoxidase); PF05834.12(Lycopene_cycl:Lycopene cyclase protein)	sp|Q01911|TETX_BACFG(Tetracycline resistance protein from transposon Tn4351/Tn4400 OS=Bacteroides fragilis OX=817 GN=tetX PE=4 SV=1)
36479	fgenesh1_pg.12_#_195	hypothetical protein	1659	2.87194	Up	3.61152e-150	COG2146(C:Energy production and conversion)	COG2146(nitrite reductase (nad(p)h) small subunit)	PF07992.14(Pyr_redox_2:Pyridine nucleotide-disulphide oxidoreductase); PF00355.26(Rieske:Rieske [2Fe-2S] domain); PF00070.27(Pyr_redox:Pyridine nucleotide-disulphide oxidoreductase)	sp|Q10499|AIF1_SCHPO(Apoptosis-inducing factor 1 OS=Schizosaccharomyces pombe (strain 972 / ATCC 24843) OX=284812 GN=aif1 PE=3 SV=3)
109920	estExt_Genewise1.C_7_t10387	PLP-dependent transferase	1721	2.86695	Up	4.1075e-167	COG0076(E:Amino acid transport and metabolism)	COG0076(decarboxylase)	PF00282.19(Pyridoxal_deC:Pyridoxal-dependent decarboxylase conserved domain); PF00266.19(Aminotran_5:Aminotransferase class-V); PF01212.21(Beta_elim_lyase:Beta-eliminating lyase)	sp|E9FCP7|DTXS4_METRA(L-aspartate decarboxylase dtxS4 OS=Metarhizium robertsii (strain ARSEF 23 / ATCC MYA-3075) OX=655844 GN=dtxS4 PE=3 SV=2)
125833	fgenesh1_pm.1_#_247	pre-mRNA splicing factor ini1	333	2.8657	Up	1.56244e-28	ENOG4111JIM(A:RNA processing and modification)	ENOG4111JIM(PHD finger protein 5A)	PF03660.14(PHF5:PHF5-like protein)	sp|P0DI19|PHF5A_ARATH(PHD finger-like domain-containing protein 5A OS=Arabidopsis thaliana OX=3702 GN=At2g30000 PE=3 SV=1)
103729	estExt_Genewise1Plus.C_270066	short chain dehydrogenase/reductase	1114	2.86413	Up	5.37116e-24	ENOG410XRR8(S:Function unknown)	ENOG410XRR8(Short-chain dehydrogenase reductase Sdr)	PF00106.25(adh_short:short chain dehydrogenase); PF13561.6(adh_short_C2:Enoyl-(Acyl carrier protein) reductase); PF08659.10(KR:KR domain)	sp|Q99J47|DRS7B_MOUSE(Dehydrogenase/reductase SDR family member 7B OS=Mus musculus OX=10090 GN=Dhrs7b PE=1 SV=1)
23736	estExt_Genemark1.C_2_t10379	P-loop containing nucleoside triphosphate hydrolase protein	2734	2.85855	Up	4.5258e-25	COG0480(S:Function unknown)	COG0480(conserved hypothetical protein)	PF00009.27(GTP_EFTU:Elongation factor Tu GTP binding domain); PF14492.6(EFG_II:Elongation Factor G, domain II); PF00679.24(EFG_C:Elongation factor G C-terminus); PF03144.25(GTP_EFTU_D2:Elongation factor Tu domain 2)	sp|B8NDZ1|RRF2M_ASPFN(Ribosome-releasing factor 2, mitochondrial OS=Aspergillus flavus (strain ATCC 200026 / FGSC A1120 / NRRL 3357 / JCM 12722 / SRRC 167) OX=332952 GN=mef2 PE=3 SV=1)
82309	e_gw1.12.454.1	family 47 glycosyl hydrolase	3213	2.8575	Up	3.35434e-67	ENOG410XS6F(O:Posttranslational modification, protein turnover, chaperones)	ENOG410XS6F(ER degradation enhancer, mannosidase alpha-like)	PF01532.20(Glyco_hydro_47:Glycosyl hydrolase family 47)	sp|O94726|MNL1_SCHPO(ER degradation-enhancing alpha-mannosidase-like protein 1 OS=Schizosaccharomyces pombe (strain 972 / ATCC 24843) OX=284812 GN=mnl1 PE=3 SV=2)
39450	fgenesh1_pg.34_#_48	MFS general substrate transporter	1305	2.85745	Up	4.41952e-13	ENOG410Y9AT(G:Carbohydrate transport and metabolism); COG0477(G:Carbohydrate transport and metabolism)	ENOG410Y9AT(Major Facilitator Superfamily); COG0477(Major Facilitator Superfamily)	PF07690.16(MFS_1:Major Facilitator Superfamily)	sp|Q5ATG7|APDF_EMENI(Aspyridones efflux protein apdF OS=Emericella nidulans (strain FGSC A4 / ATCC 38163 / CBS 112.46 / NRRL 194 / M139) OX=227321 GN=apdF PE=2 SV=1)
69721	e_gw1.1.1243.1	hypothetical protein	186	2.8523	Up	2.84208e-23	ENOG410ZIQR(O:Posttranslational modification, protein turnover, chaperones)	ENOG410ZIQR(cytochrome C oxidase)	PF05051.13(COX17:Cytochrome C oxidase copper chaperone (COX17))	sp|Q12287|COX17_YEAST(Cytochrome c oxidase copper chaperone OS=Saccharomyces cerevisiae (strain ATCC 204508 / S288c) OX=559292 GN=COX17 PE=1 SV=3)
91635	e_gw1.33.2.1	alcohol dehydrogenase	996	2.85124	Up	0.000115115	COG1064(Q:Secondary metabolites biosynthesis, transport and catabolism)	COG1064(L-lysine 6-monooxygenase (NADPH))	PF08240.12(ADH_N:Alcohol dehydrogenase GroES-like domain); PF00107.26(ADH_zinc_N:Zinc-binding dehydrogenase); PF02826.19(2-Hacid_dh_C:D-isomer specific 2-hydroxyacid dehydrogenase, NAD binding domain)	sp|P25377|ADH7_YEAST(NADP-dependent alcohol dehydrogenase 7 OS=Saccharomyces cerevisiae (strain ATCC 204508 / S288c) OX=559292 GN=ADH7 PE=1 SV=1)
62105	gw1.14.522.1	expressed protein	1395	2.84645	Up	3.08606e-08	ENOG41121NK(S:Function unknown)	ENOG41121NK(LRR)	PF13855.6(LRR_8:Leucine rich repeat); PF12799.7(LRR_4:Leucine Rich repeats (2 copies))
73291	e_gw1.3.18.1	cysteine synthase	948	2.83484	Up	8.73672e-06	COG0031(E:Amino acid transport and metabolism)	COG0031(cysteine biosynthetic process from serine)	PF00291.25(PALP:Pyridoxal-phosphate dependent enzyme)	sp|P37887|CYSK_BACSU(Cysteine synthase OS=Bacillus subtilis (strain 168) OX=224308 GN=cysK PE=1 SV=3)
142149	estExt_fgenesh1_pg.C_150161	hypothetical protein	1337	2.8302	Up	1.13375e-134	COG2816(L:Replication, recombination and repair)	COG2816(NADH pyrophosphatase)	PF00293.28(NUDIX:NUDIX domain); PF09296.11(NUDIX-like:NADH pyrophosphatase-like rudimentary NUDIX domain); PF09297.11(zf-NADH-PPase:NADH pyrophosphatase zinc ribbon domain)	sp|Q4R7L8|NUD12_MACFA(Peroxisomal NADH pyrophosphatase NUDT12 OS=Macaca fascicularis OX=9541 GN=NUDT12 PE=2 SV=1)
79958	e_gw1.9.821.1	ACN9-domain containing protein	390	2.8202	Up	3.63302e-17	ENOG4111Y90(S:Function unknown)	ENOG4111Y90(ACN9 homolog (S. cerevisiae))	PF13233.6(Complex1_LYR_2:Complex1_LYR-like); PF05347.15(Complex1_LYR:Complex 1 protein (LYR family))	sp|Q4IN52|SDHF3_GIBZE(Succinate dehydrogenase assembly factor 3, mitochondrial OS=Gibberella zeae (strain PH-1 / ATCC MYA-4620 / FGSC 9075 / NRRL 31084) OX=229533 GN=FGRRES_01356 PE=3 SV=1)
121990	estExt_fgenesh2_kg.C_20111	expressed protein	433	2.81787	Up	1.77867e-29
9776	gm1.5332_g	WD40 repeat-like protein	1533	2.81601	Up	5.26048e-15	ENOG410XQ8I(D:Cell cycle control, cell division, chromosome partitioning)	ENOG410XQ8I(Cell division cycle 20)	PF00400.32(WD40:WD domain, G-beta repeat); PF12894.7(ANAPC4_WD40:Anaphase-promoting complex subunit 4 WD40 domain); PF08662.11(eIF2A:Eukaryotic translation initiation factor eIF2A); PF16529.5(Ge1_WD40:WD40 region of Ge1, enhancer of mRNA-decapping protein)	sp|P78972|SLP1_SCHPO(WD repeat-containing protein slp1 OS=Schizosaccharomyces pombe (strain 972 / ATCC 24843) OX=284812 GN=slp1 PE=1 SV=1)
77379	e_gw1.6.661.1	DNA topoisomerase IV%2C alpha subunit	1200	2.81139	Up	6.80482e-07	COG1697(L:Replication, recombination and repair)	COG1697(DNA topoisomerase VI, subunit A)	PF04406.14(TP6A_N:Type IIB DNA topoisomerase)	sp|P40384|SPO11_SCHPO(Meiotic recombination protein rec12 OS=Schizosaccharomyces pombe (strain 972 / ATCC 24843) OX=284812 GN=rec12 PE=1 SV=2)
7183	gm1.2739_g	hypothetical protein	1545	2.80296	Up	5.39144e-08	ENOG4111DZ5(S:Function unknown); ENOG410YCEQ(S:Function unknown)	ENOG4111DZ5(GAL4); ENOG410YCEQ(-)		sp|A0A0N6WJC7|DHC4_ALTCI(Dehydrocurvularin biosynthesis regulator OS=Alternaria cinerariae OX=216837 GN=Dhc4 PE=2 SV=1)
68481	e_gw1.1.1364.1	SET domain-containing protein	1113	2.80266	Up	3.49906e-10	ENOG410Y7DR(S:Function unknown); ENOG4111VP3(S:Function unknown)	ENOG410Y7DR(debranching enzyme); ENOG4111VP3(SET domain)	PF00856.28(SET:SET domain)	sp|O74405|SET11_SCHPO(Ribosomal lysine N-methyltransferase set11 OS=Schizosaccharomyces pombe (strain 972 / ATCC 24843) OX=284812 GN=set11 PE=1 SV=1)
73469	e_gw1.3.688.1	hypothetical protein	243	2.79892	Up	9.28092e-29	ENOG4112B0H(O:Posttranslational modification, protein turnover, chaperones)	ENOG4112B0H(coiled-coil-helix-coiled-coil-helix domain containing 7)	PF06747.13(CHCH:CHCH domain); PF08991.10(MTCP1:Mature-T-Cell Proliferation I type)	sp|Q4IAJ1|COX23_GIBZE(Cytochrome c oxidase-assembly factor COX23, mitochondrial OS=Gibberella zeae (strain PH-1 / ATCC MYA-4620 / FGSC 9075 / NRRL 31084) OX=229533 GN=COX23 PE=3 SV=1)
4992	gm1.548_g	heavy metal tolerance protein	2856	2.79751	Up	6.80482e-07	COG5265(S:Function unknown)	COG5265(inositol oxygenase)	PF00005.27(ABC_tran:ABC transporter); PF00664.23(ABC_membrane:ABC transporter transmembrane region); PF02463.19(SMC_N:RecF/RecN/SMC N terminal domain)	sp|Q02592|HMT1_SCHPO(Heavy metal tolerance protein OS=Schizosaccharomyces pombe (strain 972 / ATCC 24843) OX=284812 GN=hmt1 PE=2 SV=3)
132245	fgenesh1_pm.17_#_113	hypothetical protein	1611	2.79055	Up	1.18775e-06	ENOG410YEM9(S:Function unknown)	ENOG410YEM9(Fungal specific transcription factor domain)	PF04082.18(Fungal_trans:Fungal specific transcription factor domain); PF00172.18(Zn_clus:Fungal Zn(2)-Cys(6) binuclear cluster domain)	sp|A6SSW6|BOA15_BOTFB(Transcription factor BOA15 OS=Botryotinia fuckeliana (strain B05.10) OX=332648 GN=BOA15 PE=4 SV=1)
88461	e_gw1.23.368.1	WD40 repeat-like protein	1377	2.7889	Up	4.39462e-219	ENOG410XR6A(S:Function unknown)	ENOG410XR6A(Angio-associated migratory cell protein)	PF00400.32(WD40:WD domain, G-beta repeat)	sp|P35184|SQT1_YEAST(Ribosome assembly protein SQT1 OS=Saccharomyces cerevisiae (strain ATCC 204508 / S288c) OX=559292 GN=SQT1 PE=1 SV=2)
5892	gm1.1448_g	hypothetical protein	1983	2.78544	Up	2.46326e-37	ENOG410YG94(S:Function unknown)	ENOG410YG94(GAL4)		sp|A0A2Z5U1Z1|HIMD_ASPJA(Transcription factor himD OS=Aspergillus japonicus OX=34381 GN=himD PE=3 SV=1)
11395	gm1.6951_g	hypothetical protein	624	2.78141	Up	1.1645e-57	ENOG4111T7E(S:Function unknown)	ENOG4111T7E(conserved hypothetical protein)
83950	e_gw1.15.419.1	fatty acid desaturase	1347	2.77761	Up	7.52574e-09	ENOG411074Z(I:Lipid transport and metabolism)	ENOG411074Z(fatty acid desaturase)	PF00487.24(FA_desaturase:Fatty acid desaturase)
69202	e_gw1.1.2299.1	hypothetical protein	1362	2.77744	Up	3.29844e-66	COG0697(K:Transcription)	COG0697(TAF13 RNA polymerase II, TATA box binding protein (TBP)-associated factor)	PF00892.20(EamA:EamA-like transporter family)	sp|Q08980|YP264_YEAST(Probable transport protein YPL264C OS=Saccharomyces cerevisiae (strain ATCC 204508 / S288c) OX=559292 GN=YPL264C PE=1 SV=1)
143111	estExt_fgenesh1_pg.C_320038	Protein prenylyltransferase	1092	2.7654	Up	3.44058e-30	COG5536(S:Function unknown)	COG5536(cleavage stimulation factor)	PF01239.22(PPTA:Protein prenyltransferase alpha subunit repeat)	sp|Q55DQ4|PGTA_DICDI(Geranylgeranyl transferase type-2 subunit alpha OS=Dictyostelium discoideum OX=44689 GN=rabggta PE=3 SV=2)
81949	e_gw1.11.176.1	hypothetical protein	2052	2.76308	Up	8.59518e-11	COG5082(O:Posttranslational modification, protein turnover, chaperones); COG5082(U:Intracellular trafficking, secretion, and vesicular transport)	COG5082(zinc finger); COG5082(zinc finger)
84826	e_gw1.16.196.1	hypothetical protein	1590	2.76184	Up	0.000202132	ENOG4112BAV(S:Function unknown)	ENOG4112BAV(-)
127980	fgenesh1_pm.3_#_569	putative MFS lactose permease	1512	2.76025	Up	0	ENOG410XNQK(S:Function unknown)	ENOG410XNQK(-)	PF00083.24(Sugar_tr:Sugar (and other) transporter); PF07690.16(MFS_1:Major Facilitator Superfamily); PF06779.14(MFS_4:Uncharacterised MFS-type transporter YbfB); PF06609.13(TRI12:Fungal trichothecene efflux pump (TRI12))	sp|P07921|LACP_KLULA(Lactose permease OS=Kluyveromyces lactis (strain ATCC 8585 / CBS 2359 / DSM 70799 / NBRC 1267 / NRRL Y-1140 / WM37) OX=284590 GN=LAC12 PE=3 SV=1)
133120	fgenesh1_pm.22_#_40	CDK-activating kinase assembly factor MAT1	1149	2.75356	Up	3.23208e-37	COG5220(K:Transcription)	COG5220(menage a trois homolog 1, cyclin H assembly factor (Xenopus laevis))	PF06391.13(MAT1:CDK-activating kinase assembly factor MAT1); PF17121.5(zf-C3HC4_5:Zinc finger, C3HC4 type (RING finger)); PF00097.25(zf-C3HC4:Zinc finger, C3HC4 type (RING finger)); PF13920.6(zf-C3HC4_3:Zinc finger, C3HC4 type (RING finger))	sp|Q6FMP4|TFB3_CANGA(RNA polymerase II transcription factor B subunit 3 OS=Candida glabrata (strain ATCC 2001 / CBS 138 / JCM 3761 / NBRC 0622 / NRRL Y-65) OX=284593 GN=TFB3 PE=3 SV=1)
24884	estExt_Genemark1.C_80135	zf-ZPR1-domain containing protein	1454	2.75153	Up	0	COG1779(S:Function unknown)	COG1779(zinc ion binding)	PF03367.13(zf-ZPR1:ZPR1 zinc-finger domain)	sp|O13724|ZPR1_SCHPO(Zinc finger protein zpr1 OS=Schizosaccharomyces pombe (strain 972 / ATCC 24843) OX=284812 GN=zpr1 PE=3 SV=1)
109517	estExt_Genewise1.C_6_t20186	fungal-specific transcription factor domain-containing protein	2297	2.74617	Up	1.38517e-301	ENOG410Y9CN(S:Function unknown)	ENOG410Y9CN(Fungal_trans)	PF04082.18(Fungal_trans:Fungal specific transcription factor domain); PF00172.18(Zn_clus:Fungal Zn(2)-Cys(6) binuclear cluster domain)	sp|G4N2A1|TRF1_MAGO7(Pyriculol/pyriculariol biosynthesis cluster transcription factor 1 OS=Magnaporthe oryzae (strain 70-15 / ATCC MYA-4617 / FGSC 8958) OX=242507 GN=TRF1 PE=3 SV=2)
36398	fgenesh1_pg.12_#_114	dibenzothiophene desulfurization enzyme A	1440	2.74484	Up	1.75838e-107	COG2141(S:Function unknown)	COG2141(Conserved hypothetical, protein)	PF00296.20(Bac_luciferase:Luciferase-like monooxygenase)	sp|E9JFX9|DMOA_HYPSL(Dimethyl-sulfide monooxygenase OS=Hyphomicrobium sulfonivorans OX=121290 GN=dmoA PE=1 SV=1)
74227	e_gw1.4.1018.1	hypothetical protein	1074	2.73697	Up	2.0668e-06	ENOG410XRUD(S:Function unknown)	ENOG410XRUD(trimethylguanosine synthase)	PF09445.10(Methyltransf_15:RNA cap guanine-N2 methyltransferase)	sp|Q96RS0|TGS1_HUMAN(Trimethylguanosine synthase OS=Homo sapiens OX=9606 GN=TGS1 PE=1 SV=3)
62262	gw1.39.92.1	Ankyrin	2490	2.7318	Up	0.000353258	COG0666(S:Function unknown); COG0775(S:Function unknown)	COG0666(Phosphorylase superfamily); COG0775(Phosphorylase superfamily)	PF12796.7(Ank_2:Ankyrin repeats (3 copies)); PF13857.6(Ank_5:Ankyrin repeats (many copies)); PF00023.30(Ank:Ankyrin repeat); PF13606.6(Ank_3:Ankyrin repeat); PF13637.6(Ank_4:Ankyrin repeats (many copies)); PF05729.12(NACHT:NACHT domain); PF13191.6(AAA_16:AAA ATPase domain)	sp|Q00808|HETE1_PODAS(Vegetative incompatibility protein HET-E-1 OS=Podospora anserina OX=5145 GN=HET-E1 PE=4 SV=1)
95982	estExt_Genewise1Plus.C_2_t40299	hypothetical protein	970	2.73039	Up	1.63297e-07	ENOG410Z9B0(S:Function unknown)	ENOG410Z9B0(-)
5799	gm1.1355_g	Dihydropteroate synthase	1578	2.73039	Up	1.1841e-14	COG0294(H:Coenzyme transport and metabolism)	COG0294(dihydropteroate synthase)	PF00809.22(Pterin_bind:Pterin binding enzyme); PF01288.20(HPPK:7,8-dihydro-6-hydroxymethylpterin-pyrophosphokinase (HPPK))	sp|P29251|FOL1_PNECA(Folic acid synthesis protein fol1 OS=Pneumocystis carinii OX=4754 GN=fol1 PE=1 SV=1)
42889	gw1.24.61.1	hypothetical protein	723	2.72792	Up	2.0668e-06	ENOG4111HBH(S:Function unknown)	ENOG4111HBH(Conserved hypothetical, protein)
80461	e_gw1.10.84.1	membrane zinc transporter	1098	2.7212	Up	1.10032e-101	ENOG4111GP2(S:Function unknown)	ENOG4111GP2(-)	PF02535.22(Zip:ZIP Zinc transporter)	sp|Q12436|ZRT2_YEAST(Zinc-regulated transporter 2 OS=Saccharomyces cerevisiae (strain ATCC 204508 / S288c) OX=559292 GN=ZRT2 PE=1 SV=1)
120601	fgenesh2_kg.25_#_20_#_gi|38129394|gb|CF874712.1|CF874712	expressed protein	433	2.71839	Up	1.73091e-12
37157	fgenesh1_pg.16_#_32	Quinone oxidoreductase putative	1011	2.71684	Up	6.68868e-51	COG0604(S:Function unknown)	COG0604(-)	PF00107.26(ADH_zinc_N:Zinc-binding dehydrogenase); PF13602.6(ADH_zinc_N_2:Zinc-binding dehydrogenase); PF08240.12(ADH_N:Alcohol dehydrogenase GroES-like domain)	sp|Q53FA7|QORX_HUMAN(Quinone oxidoreductase PIG3 OS=Homo sapiens OX=9606 GN=TP53I3 PE=1 SV=2)
138334	estExt_fgenesh1_pm.C_170192	sulfate permease II	2764	2.70333	Up	4.46196e-294	COG0659(S:Function unknown)	COG0659(integral membrane protein)	PF00916.20(Sulfate_transp:Sulfate permease family); PF01740.21(STAS:STAS domain)	sp|P23622|CYS14_NEUCR(Sulfate permease 2 OS=Neurospora crassa (strain ATCC 24698 / 74-OR23-1A / CBS 708.71 / DSM 1257 / FGSC 987) OX=367110 GN=cys-14 PE=2 SV=3)
90736	e_gw1.30.165.1	Cytochrome P450	1683	2.69786	Up	2.83046e-07	COG2124(Q:Secondary metabolites biosynthesis, transport and catabolism)	COG2124(Cytochrome p450)	PF00067.22(p450:Cytochrome P450)	sp|P0DPA4|FCK2_FUSPC(Cytochrome P450 monooxygenase FCK2 OS=Fusarium pseudograminearum (strain CS3096) OX=1028729 GN=FCK2 PE=2 SV=1)
68256	e_gw1.1.1196.1	HET-domain containing protein	1464	2.69773	Up	3.58484e-06	ENOG410YIQ5(G:Carbohydrate transport and metabolism); ENOG410YKJR(G:Carbohydrate transport and metabolism)	ENOG410YIQ5(SMP-30 gluconolaconase LRE domain protein); ENOG410YKJR(SMP-30 gluconolaconase LRE domain protein)	PF06985.11(HET:Heterokaryon incompatibility protein (HET))	sp|Q9UV10|HET6_NEUCR(Heterokaryon incompatibility protein 6, OR allele OS=Neurospora crassa (strain ATCC 24698 / 74-OR23-1A / CBS 708.71 / DSM 1257 / FGSC 987) OX=367110 GN=het-6 PE=4 SV=1)
51467	gw1.17.233.1	hypothetical protein	1899	2.69459	Up	0.000353258	ENOG411006K(S:Function unknown)	ENOG411006K(NACHT domain)	PF05729.12(NACHT:NACHT domain); PF13401.6(AAA_22:AAA domain); PF13191.6(AAA_16:AAA ATPase domain); PF07693.14(KAP_NTPase:KAP family P-loop domain)
67733	e_gw1.1.301.1	hypothetical protein	2055	2.68891	Up	3.58484e-06	ENOG4110KAH(S:Function unknown)	ENOG4110KAH(glycoside hydrolase family 79 protein)	PF04082.18(Fungal_trans:Fungal specific transcription factor domain); PF00172.18(Zn_clus:Fungal Zn(2)-Cys(6) binuclear cluster domain)	sp|P40467|ASG1_YEAST(Activator of stress genes 1 OS=Saccharomyces cerevisiae (strain ATCC 204508 / S288c) OX=559292 GN=ASG1 PE=1 SV=1)
40931	gw1.48.4.1	hypothetical protein	531	2.68605	Up	3.58484e-06			PF04082.18(Fungal_trans:Fungal specific transcription factor domain)	sp|B6HNK4|SORR2_PENRW(Sorbicillinoid biosynthetic cluster transcription factor 2 OS=Penicillium rubens (strain ATCC 28089 / DSM 1075 / NRRL 1951 / Wisconsin 54-1255) OX=500485 GN=sorR2 PE=4 SV=1)
88907	e_gw1.24.234.1	hypothetical protein	4821	2.68072	Up	3.913e-08	ENOG410YIPC(S:Function unknown)	ENOG410YIPC(Conserved hypothetical, protein)	PF12894.7(ANAPC4_WD40:Anaphase-promoting complex subunit 4 WD40 domain); PF00400.32(WD40:WD domain, G-beta repeat)	sp|Q2TBM9|SRAC1_BOVIN(Protein SERAC1 OS=Bos taurus OX=9913 GN=SERAC1 PE=2 SV=1)
86800	e_gw1.19.372.1	hypothetical protein	1671	2.68012	Up	0.000353258	ENOG4110WY8(S:Function unknown); ENOG4110TAR(S:Function unknown)	ENOG4110WY8(Fungal Zn(2)-Cys(6) binuclear cluster domain); ENOG4110TAR(-)	PF11951.8(Fungal_trans_2:Fungal specific transcription factor domain); PF00172.18(Zn_clus:Fungal Zn(2)-Cys(6) binuclear cluster domain)	sp|A0A067XMT7|PTAR3_PESFW(Pestheic acid cluster transcriptional regulator 3 OS=Pestalotiopsis fici (strain W106-1 / CGMCC3.15140) OX=1229662 GN=ptaR3 PE=3 SV=2)
95799	estExt_Genewise1Plus.C_2_t30464	alcohol dehydrogenase	1247	2.67769	Up	4.24722e-13	COG1064(S:Function unknown)	COG1064(-)	PF08240.12(ADH_N:Alcohol dehydrogenase GroES-like domain); PF00107.26(ADH_zinc_N:Zinc-binding dehydrogenase); PF13602.6(ADH_zinc_N_2:Zinc-binding dehydrogenase)	sp|A0A075TMP0|PATD_PENEN(Alcohol dehydrogenase patD OS=Penicillium expansum OX=27334 GN=patD PE=1 SV=1)
133518	fgenesh1_pm.24_#_139	hypothetical protein	1458	2.67671	Up	4.62554e-05	ENOG410YCUG(S:Function unknown); ENOG41113AV(S:Function unknown)	ENOG410YCUG(Methyltransferase); ENOG41113AV(-)
135423	estExt_fgenesh1_pm.C_1_t10422	chaperonin GroL	2112	2.67313	Up	0	COG0459(S:Function unknown)	COG0459(actin-depolymerizing factor)	PF00118.24(Cpn60_TCP1:TCP-1/cpn60 chaperonin family)	sp|Q5B041|HSP60_EMENI(Heat shock protein 60 OS=Emericella nidulans (strain FGSC A4 / ATCC 38163 / CBS 112.46 / NRRL 194 / M139) OX=227321 GN=hsp60 PE=1 SV=1)
23798	estExt_Genemark1.C_2_t10497	expressed protein	669	2.67133	Up	5.75724e-79	ENOG410ZBGQ(S:Function unknown)	ENOG410ZBGQ(-)
123359	estExt_fgenesh2_kg.C_90043	hypothetical protein	588	2.67029	Up	3.78924e-152	ENOG41121W4(O:Posttranslational modification, protein turnover, chaperones)	ENOG41121W4(CytoChrome c oxidase assembly)	PF06747.13(CHCH:CHCH domain)	sp|P0CT19|COX19_MAGOY(Cytochrome c oxidase assembly protein COX19 OS=Magnaporthe oryzae (strain Y34) OX=1143189 GN=COX19 PE=3 SV=1)
24055	estExt_Genemark1.C_3_t10353	proteasome component ECM29	5487	2.66529	Up	2.46734e-74	ENOG410XPYT(S:Function unknown)	ENOG410XPYT(Proteasome-associated protein ECM29 homolog)	PF13001.7(Ecm29:Proteasome stabiliser)	sp|P38737|ECM29_YEAST(Proteasome component ECM29 OS=Saccharomyces cerevisiae (strain ATCC 204508 / S288c) OX=559292 GN=ECM29 PE=1 SV=1)
135615	estExt_fgenesh1_pm.C_1_t20339	heavy metal translocatin	3767	2.65882	Up	0	COG2217(O:Posttranslational modification, protein turnover, chaperones)	COG2217(COP9 (constitutive photomorphogenic) homolog, subunit)	PF00122.20(E1-E2_ATPase:E1-E2 ATPase); PF00403.26(HMA:Heavy-metal-associated domain); PF00702.26(Hydrolase:haloacid dehalogenase-like hydrolase); PF08282.12(Hydrolase_3:haloacid dehalogenase-like hydrolase)	sp|P35670|ATP7B_HUMAN(Copper-transporting ATPase 2 OS=Homo sapiens OX=9606 GN=ATP7B PE=1 SV=4)
101044	estExt_Genewise1Plus.C_14_t10179	hypothetical protein	1807	2.65758	Up	1.4864e-17	COG0452(S:Function unknown)	COG0452(MON2 homolog (S. cerevisiae))	PF02441.19(Flavoprotein:Flavoprotein)
7359	gm1.2915_g	S-adenosyl-L-methionine-dependent methyltransferase	1980	2.65535	Up	6.19668e-06	COG0270(L:Replication, recombination and repair)	COG0270(Cytosine-specific methyltransferase)	PF00145.17(DNA_methylase:C-5 cytosine-specific DNA methylase)	sp|Q59606|MTF7_NEIGO(Modification methylase NgoFVII OS=Neisseria gonorrhoeae OX=485 GN=ngoFVIIM PE=3 SV=1)
68059	e_gw1.1.1408.1	protein kinase	1701	2.65495	Up	5.44896e-09	COG5072(D:Cell cycle control, cell division, chromosome partitioning)	COG5072(germ cell associated 2 (haspin))	PF12330.8(Haspin_kinase:Haspin like kinase domain)	sp|O13924|HASP_SCHPO(Serine/threonine-protein kinase haspin homolog hrk1 OS=Schizosaccharomyces pombe (strain 972 / ATCC 24843) OX=284812 GN=hrk1 PE=1 SV=1)
102202	estExt_Genewise1Plus.C_18_t10325	putative acyl-CoA sterol acyltransferase	1830	2.65353	Up	9.01792e-137	COG5056(I:Lipid transport and metabolism)	COG5056(Oacyltransferase)	PF03062.19(MBOAT:MBOAT, membrane-bound O-acyltransferase family)	sp|Q9UU82|AREH2_SCHPO(Probable sterol O-acyltransferase 2 OS=Schizosaccharomyces pombe (strain 972 / ATCC 24843) OX=284812 GN=are2 PE=1 SV=1)
5678	gm1.1234_g	hypothetical protein	1224	2.65181	Up	3.40458e-36	ENOG410XZRZ(S:Function unknown); COG0500(S:Function unknown)	ENOG410XZRZ(Putative methyltransferase); COG0500(Putative methyltransferase)	PF10294.9(Methyltransf_16:Lysine methyltransferase); PF13489.6(Methyltransf_23:Methyltransferase domain)	sp|O13926|YF66_SCHPO(UPF0665 family protein C23C4.06c OS=Schizosaccharomyces pombe (strain 972 / ATCC 24843) OX=284812 GN=SPAC23C4.06c PE=3 SV=1)
26798	estExt_Genemark1.C_330046	hypothetical protein	916	2.64842	Up	3.35612e-63	COG5564(S:Function unknown)	COG5564(TIM-barrel signal transduction protein)	PF09370.10(PEP_hydrolase:Phosphoenolpyruvate hydrolase-like); PF03060.15(NMO:Nitronate monooxygenase)	sp|P55607|Y4OV_SINFN(Uncharacterized protein y4oV OS=Sinorhizobium fredii (strain NBRC 101917 / NGR234) OX=394 GN=NGR_a02140 PE=4 SV=1)
136373	estExt_fgenesh1_pm.C_40101	NADP-dependent glycerol dehydrogenase	1056	2.64559	Up	4.43776e-20	COG0656(G:Carbohydrate transport and metabolism)	COG0656(6-phosphogluconolactonase)	PF00248.21(Aldo_ket_red:Aldo/keto reductase family)	sp|Q0GYU5|GLD1_HYPJE(D/L-glyceraldehyde reductase OS=Hypocrea jecorina OX=51453 GN=gld1 PE=1 SV=1)
26427	estExt_Genemark1.C_250005	hypothetical protein	910	2.63931	Up	1.38648e-25	ENOG4110W5G(S:Function unknown); ENOG410Y5IZ(S:Function unknown); ENOG410Y833(S:Function unknown)	ENOG4110W5G(Endoplasmic reticulum-based factor for assembly of V-ATPase); ENOG410Y5IZ(Endoplasmic reticulum-based factor for assembly of V-ATPase); ENOG410Y833(Conserved hypothetical, protein)	PF11712.8(Vma12:Endoplasmic reticulum-based factor for assembly of V-ATPase)
24169	estExt_Genemark1.C_40123	thioredoxin M-type	517	2.6359	Up	0	ENOG410YQ2G(O:Posttranslational modification, protein turnover, chaperones); COG0526(O:Posttranslational modification, protein turnover, chaperones)	ENOG410YQ2G(thioredoxin-like protein); COG0526(Thioredoxin)	PF00085.20(Thioredoxin:Thioredoxin); PF04756.13(OST3_OST6:OST3 / OST6 family, transporter family); PF13899.6(Thioredoxin_7:Thioredoxin-like); PF13098.6(Thioredoxin_2:Thioredoxin-like domain); PF14595.6(Thioredoxin_9:Thioredoxin)	sp|Q9USR1|TXL1_SCHPO(Thioredoxin-like protein 1 OS=Schizosaccharomyces pombe (strain 972 / ATCC 24843) OX=284812 GN=txl1 PE=4 SV=1)
134774	fgenesh1_pm.39_#_14	hypothetical protein	1647	2.62449	Up	1.31068e-09	ENOG410ZJJV(S:Function unknown)	ENOG410ZJJV(Glycosyltransferase family 31 protein)	PF02434.16(Fringe:Fringe-like); PF04646.12(DUF604:Protein of unknown function, DUF604)	sp|Q8JHF2|LFNG_DANRE(Beta-1,3-N-acetylglucosaminyltransferase lunatic fringe OS=Danio rerio OX=7955 GN=lfng PE=2 SV=2)
135507	estExt_fgenesh1_pm.C_1_t20136	aspartic protease pro-precursor	1247	2.61546	Up	7.99684e-05	ENOG410XNV7(S:Function unknown)	ENOG410XNV7(Cupin 2 Conserved Barrel Domain Protein)	PF00026.23(Asp:Eukaryotic aspartyl protease); PF14543.6(TAXi_N:Xylanase inhibitor N-terminal)	sp|P11838|CARP_CRYPA(Endothiapepsin OS=Cryphonectria parasitica OX=5116 GN=EAPA PE=1 SV=2)
7919	gm1.3475_g	trimethyllysine dioxygenase	1074	2.61518	Up	2.69916e-21	COG2175(O:Posttranslational modification, protein turnover, chaperones)	COG2175(ubiquitin carboxyl-terminal hydrolase)	PF02668.16(TauD:Taurine catabolism dioxygenase TauD, TfdA family); PF06155.12(DUF971:Protein of unknown function (DUF971))	sp|Q96UB1|TMLH_NEUCR(Trimethyllysine dioxygenase OS=Neurospora crassa (strain ATCC 24698 / 74-OR23-1A / CBS 708.71 / DSM 1257 / FGSC 987) OX=367110 GN=cbs-1 PE=2 SV=2)
101702	estExt_Genewise1Plus.C_16_t10367	RAI1-domain containing protein	1243	2.61362	Up	2.59904e-11	ENOG410ZAFR(S:Function unknown)	ENOG410ZAFR(Ribonuclease that specifically degrades pre-mRNAs with a defective 5' end cap and is part of a pre-mRNA capping quality control. Has decapping and pyrophosphohydrolase activities. Has decapping activity toward incomplete 5' end cap mRNAs such as unmethylated 5' end-capped RNA to release GpppN and 5' end monophosphate RNA. Also possesses RNA 5'-pyrophosphohydrolase activity by hydrolyz…	PF08652.11(RAI1:RAI1 like PD-(D/E)XK nuclease)	sp|Q4I613|DXO_GIBZE(Decapping nuclease RAI1 OS=Gibberella zeae (strain PH-1 / ATCC MYA-4620 / FGSC 9075 / NRRL 31084) OX=229533 GN=RAI1 PE=3 SV=4)
103075	estExt_Genewise1Plus.C_220252	hypothetical protein	1669	2.60892	Up	2.10384e-27	ENOG410YDU1(S:Function unknown)	ENOG410YDU1(Conserved hypothetical, protein)	PF06101.11(Vps62:Vacuolar protein sorting-associated protein 62)	sp|Q06466|TDA6_YEAST(Putative vacuolar protein sorting-associated protein TDA6 OS=Saccharomyces cerevisiae (strain ATCC 204508 / S288c) OX=559292 GN=TDA6 PE=2 SV=1)
99110	estExt_Genewise1Plus.C_8_t20304	glutamate decarboxylase	1771	2.60861	Up	7.46884e-223	COG0076(E:Amino acid transport and metabolism)	COG0076(Acetylornithine aminotransferase)	PF00282.19(Pyridoxal_deC:Pyridoxal-dependent decarboxylase conserved domain); PF00266.19(Aminotran_5:Aminotransferase class-V)	sp|Q07346|DCE_PETHY(Glutamate decarboxylase OS=Petunia hybrida OX=4102 GN=GAD PE=1 SV=1)
79096	e_gw1.8.471.1	hypothetical protein	3027	2.60029	Up	3.78068e-19	ENOG4111JKS(S:Function unknown)	ENOG4111JKS(Conserved hypothetical, protein)	PF10214.9(Rrn6:RNA polymerase I-specific transcription-initiation factor)
78617	e_gw1.7.727.1	hypothetical protein	1137	2.60013	Up	2.62792e-18	ENOG4111H21(S:Function unknown)	ENOG4111H21(IBR finger domain protein)	PF01485.21(IBR:IBR domain, a half RING-finger domain)	sp|P0CE10|DEAHB_ARATH(ATP-dependent RNA helicase DEAH11, chloroplastic OS=Arabidopsis thaliana OX=3702 GN=At4g01020 PE=3 SV=1)
71681	e_gw1.2.1545.1	hypothetical protein	2580	2.59724	Up	2.1742e-16	ENOG410XRN3(S:Function unknown)	ENOG410XRN3(FANCD2 FANCI-associated nuclease 1)	PF08774.11(VRR_NUC:VRR-NUC domain)	sp|Q9Y804|FAN1_SCHPO(Fanconi-associated nuclease 1 homolog OS=Schizosaccharomyces pombe (strain 972 / ATCC 24843) OX=284812 GN=SPBC146.06c PE=1 SV=1)
119933	fgenesh2_kg.16_#_60_#_gi|30110022|gb|CB895364.1|CB895364	expressed protein	593	2.59541	Up	2.34302e-39	ENOG410Z0IF(S:Function unknown)	ENOG410Z0IF(-)
70913	e_gw1.2.28.1	short chain dehydrogenase	954	2.59502	Up	4.4443e-11	COG1028(Q:Secondary metabolites biosynthesis, transport and catabolism)	COG1028(dsbA oxidoreductase)	PF00106.25(adh_short:short chain dehydrogenase); PF13561.6(adh_short_C2:Enoyl-(Acyl carrier protein) reductase); PF08659.10(KR:KR domain)	sp|Q6P5L8|HSDL2_DANRE(Hydroxysteroid dehydrogenase-like protein 2 OS=Danio rerio OX=7955 GN=hsdl2 PE=2 SV=1)
5706	gm1.1262_g	hypothetical protein	1653	2.59128	Up	2.00862e-24	ENOG410YKGA(S:Function unknown)	ENOG410YKGA(-)	PF00172.18(Zn_clus:Fungal Zn(2)-Cys(6) binuclear cluster domain)	sp|A0A179G9G5|LCSL_PURLI(Transcription regulator lscL OS=Purpureocillium lilacinum OX=33203 GN=lcsL PE=2 SV=1)
77742	e_gw1.7.98.1	asparaginyl-tRNA synthetase	1575	2.58943	Up	4.21218e-26	COG0017(S:Function unknown)	COG0017(Phospholipase/Carboxylesterase)	PF00152.20(tRNA-synt_2:tRNA synthetases class II (D, K and N)); PF01336.25(tRNA_anti-codon:OB-fold nucleic acid binding domain)	sp|Q6ANL4|SYN_DESPS(Asparagine--tRNA ligase OS=Desulfotalea psychrophila (strain LSv54 / DSM 12343) OX=177439 GN=asnS PE=3 SV=1)
68451	e_gw1.1.653.1	expressed protein	663	2.58674	Up	9.2751e-20	ENOG4112C0G(S:Function unknown)	ENOG4112C0G(-)
88479	e_gw1.23.125.1	MFS transporter	1458	2.58496	Up	6.28784e-12	COG0477(S:Function unknown)	COG0477(-)	PF07690.16(MFS_1:Major Facilitator Superfamily)	sp|Q9P6J0|YHDC_SCHPO(Uncharacterized transporter C1683.12 OS=Schizosaccharomyces pombe (strain 972 / ATCC 24843) OX=284812 GN=SPBC1683.12 PE=3 SV=1)
44231	gw1.9.149.1	hypothetical protein	1488	2.58496	Up	7.99684e-05	ENOG4110XPB(S:Function unknown); ENOG4111WXW(S:Function unknown)	ENOG4110XPB(Fungal specific transcription factor domain); ENOG4111WXW(Fungal specific transcription factor domain)	PF04082.18(Fungal_trans:Fungal specific transcription factor domain)	sp|D7UQ41|SOL4_ALTSO(Probable transcription factor sol4 OS=Alternaria solani OX=48100 GN=sol4 PE=4 SV=1)
75107	e_gw1.4.1094.1	molybdenum cofactor biosynthesis protein 1 B	1980	2.58368	Up	1.28448e-28	COG2896(H:Coenzyme transport and metabolism)	COG2896(Catalyzes, together with MoaC, the conversion of 5'-GTP to cyclic pyranopterin monophosphate (cPMP or molybdopterin precursor Z) (By similarity))	PF01967.21(MoaC:MoaC family); PF06463.13(Mob_synth_C:Molybdenum Cofactor Synthesis C); PF04055.21(Radical_SAM:Radical SAM superfamily); PF13353.6(Fer4_12:4Fe-4S single cluster domain)	sp|Q9NZB8|MOCS1_HUMAN(Molybdenum cofactor biosynthesis protein 1 OS=Homo sapiens OX=9606 GN=MOCS1 PE=1 SV=3)
35812	fgenesh1_pg.10_#_41	hypothetical protein	852	2.58263	Up	1.98824e-07	COG1853(T:Signal transduction mechanisms)	COG1853(Phosphodiesterase)	PF01613.18(Flavin_Reduct:Flavin reductase like domain)	sp|Q9KAK9|Y2278_BACHD(Uncharacterized protein BH2278 OS=Bacillus halodurans (strain ATCC BAA-125 / DSM 18197 / FERM 7344 / JCM 9153 / C-125) OX=272558 GN=BH2278 PE=3 SV=1)
31785	fgenesh1_pg.1_#_274	Alg9-like mannosyltransferase	1548	2.58222	Up	1.43982e-40	ENOG410XTCB(S:Function unknown)	ENOG410XTCB(Phosphatidylinositol glycan anchor biosynthesis, class Z)	PF03901.17(Glyco_transf_22:Alg9-like mannosyltransferase family)	sp|Q4I785|SMP3_GIBZE(GPI mannosyltransferase 4 OS=Gibberella zeae (strain PH-1 / ATCC MYA-4620 / FGSC 9075 / NRRL 31084) OX=229533 GN=SMP3 PE=3 SV=2)
135863	estExt_fgenesh1_pm.C_2_t10296	chaperone DnaJ	1777	2.57251	Up	4.18318e-166	COG0484(O:Posttranslational modification, protein turnover, chaperones)	COG0484(DnaJ (Hsp40) homolog, subfamily C, member 8)	PF01556.18(DnaJ_C:DnaJ C terminal domain); PF00226.31(DnaJ:DnaJ domain); PF00684.19(DnaJ_CXXCXGXG:DnaJ central domain)	sp|C8V213|MDJ1_EMENI(DnaJ homolog 1, mitochondrial OS=Emericella nidulans (strain FGSC A4 / ATCC 38163 / CBS 112.46 / NRRL 194 / M139) OX=227321 GN=AN10778 PE=3 SV=1)
127668	fgenesh1_pm.3_#_257	P-loop containing nucleoside triphosphate hydrolase protein	4689	2.57209	Up	0	COG1132(S:Function unknown)	COG1132(Conserved hypothetical, protein)	PF00005.27(ABC_tran:ABC transporter); PF00664.23(ABC_membrane:ABC transporter transmembrane region); PF02463.19(SMC_N:RecF/RecN/SMC N terminal domain); PF13476.6(AAA_23:AAA domain)	sp|Q6FWS5|YBT1_CANGA(Pleiotropic ABC efflux transporter of multiple drugs YBT1 OS=Candida glabrata (strain ATCC 2001 / CBS 138 / JCM 3761 / NBRC 0622 / NRRL Y-65) OX=284593 GN=YBT1 PE=2 SV=1)
87399	e_gw1.21.271.1	hypothetical protein	3411	2.56478	Up	3.67972e-13	ENOG410XRET(O:Posttranslational modification, protein turnover, chaperones)	ENOG410XRET(ubiquitin-conjugating enzyme)	PF00644.20(PARP:Poly(ADP-ribose) polymerase catalytic domain); PF00179.26(UQ_con:Ubiquitin-conjugating enzyme)	sp|Q9VM35|U2QL1_DROME(Ubiquitin-conjugating enzyme E2Q-like protein CG4502 OS=Drosophila melanogaster OX=7227 GN=CG4502 PE=2 SV=1)
83926	e_gw1.15.75.1	P-loop containing nucleoside triphosphate hydrolase protein	1719	2.56399	Up	1.32847e-29	COG1219(O:Posttranslational modification, protein turnover, chaperones)	COG1219(ATP-dependent specificity component of the Clp protease. It directs the protease to specific substrates. Can perform chaperone functions in the absence of ClpP (By similarity))	PF07724.14(AAA_2:AAA domain (Cdc48 subfamily)); PF00004.29(AAA:ATPase family associated with various cellular activities (AAA)); PF10431.9(ClpB_D2-small:C-terminal, D2-small domain, of ClpB protein); PF00493.23(MCM:MCM P-loop domain); PF07728.14(AAA_5:AAA domain (dynein-related subfamily)); PF13401.6(AAA_22:AAA domain)	sp|P38323|CLPX_YEAST(ATP-dependent clpX-like chaperone, mitochondrial OS=Saccharomyces cerevisiae (strain ATCC 204508 / S288c) OX=559292 GN=MCX1 PE=1 SV=1)
136921	estExt_fgenesh1_pm.C_70092	rRNA processing protein	1905	2.56166	Up	1.18299e-57	COG5184(D:Cell cycle control, cell division, chromosome partitioning); COG5184(Z:Cytoskeleton)	COG5184(regulator of chromosome condensation); COG5184(regulator of chromosome condensation)	PF00415.18(RCC1:Regulator of chromosome condensation (RCC1) repeat); PF13540.6(RCC1_2:Regulator of chromosome condensation (RCC1) repeat)	sp|Q08023|FMP25_YEAST(Protein FMP25, mitochondrial OS=Saccharomyces cerevisiae (strain ATCC 204508 / S288c) OX=559292 GN=FMP25 PE=4 SV=1)
92502	e_gw1.40.83.1	Metallo-dependent hydrolase	1506	2.55459	Up	1.8314e-05	COG0402(L:Replication, recombination and repair)	COG0402(Podospora anserina S mat genomic DNA chromosome 3, supercontig 2)	PF01979.20(Amidohydro_1:Amidohydrolase family); PF07969.11(Amidohydro_3:Amidohydrolase family)	sp|A5D1G6|MTAD_PELTS(5-methylthioadenosine/S-adenosylhomocysteine deaminase OS=Pelotomaculum thermopropionicum (strain DSM 13744 / JCM 10971 / SI) OX=370438 GN=mtaD PE=3 SV=1)
77399	e_gw1.6.232.1	hypothetical protein	540	2.55364	Up	7.48814e-15	COG3805(Q:Secondary metabolites biosynthesis, transport and catabolism)	COG3805(dopa 4,5-dioxygenase)	PF08883.11(DOPA_dioxygen:Dopa 4,5-dioxygenase family)	sp|P56739|Y212_BOTFU(Uncharacterized 21.2 kDa protein OS=Botryotinia fuckeliana OX=40559 PE=2 SV=1)
139269	estExt_fgenesh1_pm.C_320057	MFS general substrate transporter	1668	2.55117	Up	1.8314e-05	ENOG410XNZG(G:Carbohydrate transport and metabolism)	ENOG410XNZG(major facilitator superfamily)	PF07690.16(MFS_1:Major Facilitator Superfamily)	sp|Q8X4V6|YGAY_ECO57(Uncharacterized transporter YgaY OS=Escherichia coli O157:H7 OX=83334 GN=ygaY PE=3 SV=1)
82168	e_gw1.12.101.1	4-hydroxyacetophenone monooxygenase	1785	2.55078	Up	1.53523e-16	COG2072(S:Function unknown)	COG2072(Conserved hypothetical, protein)	PF00743.19(FMO-like:Flavin-binding monooxygenase-like); PF13450.6(NAD_binding_8:NAD(P)-binding Rossmann-like domain); PF07992.14(Pyr_redox_2:Pyridine nucleotide-disulphide oxidoreductase); PF13738.6(Pyr_redox_3:Pyridine nucleotide-disulphide oxidoreductase); PF01266.24(DAO:FAD dependent oxidoreductase); PF01946.17(Thi4:Thi4 family)	sp|Q30DW9|MOXY_DOTSE(FAD-binding monooxygenase moxY OS=Dothistroma septosporum OX=64363 GN=moxY PE=2 SV=1)
135899	estExt_fgenesh1_pm.C_2_t10367	ATP-dependent protease La	2814	2.54882	Up	3.08472e-184	COG0466(L:Replication, recombination and repair)	COG0466(Replication Protein)	PF05362.13(Lon_C:Lon protease (S16) C-terminal proteolytic domain); PF02190.16(LON_substr_bdg:ATP-dependent protease La (LON) substrate-binding domain); PF00004.29(AAA:ATPase family associated with various cellular activities (AAA)); PF07728.14(AAA_5:AAA domain (dynein-related subfamily)); PF13541.6(ChlI:Subunit ChlI of Mg-chelatase); PF13191.6(AAA_16:AAA ATPase domain); PF13401.6(AAA_22:AAA doma…	sp|Q7SA85|LONP2_NEUCR(Lon protease homolog 2, peroxisomal OS=Neurospora crassa (strain ATCC 24698 / 74-OR23-1A / CBS 708.71 / DSM 1257 / FGSC 987) OX=367110 GN=NCU08303 PE=3 SV=1)
11459	gm1.7015_g	hypothetical protein	1755	2.54507	Up	4.7022e-08	COG1948(L:Replication, recombination and repair)	COG1948(Excision repair cross-complementing rodent repair deficiency, complementation group 4)	PF02732.15(ERCC4:ERCC4 domain)	sp|Q4INS6|MUS81_GIBZE(Crossover junction endonuclease MUS81 OS=Gibberella zeae (strain PH-1 / ATCC MYA-4620 / FGSC 9075 / NRRL 31084) OX=229533 GN=MUS81 PE=3 SV=1)
4488	gm1.44_g	hypothetical protein	960	2.54273	Up	0.000137633	ENOG4110WAX(S:Function unknown); ENOG4111B8M(S:Function unknown)	ENOG4110WAX(-); ENOG4111B8M(-)	PF11951.8(Fungal_trans_2:Fungal specific transcription factor domain)
75830	e_gw1.5.587.1	hypothetical protein	750	2.5402	Up	4.73006e-56
101365	estExt_Genewise1Plus.C_15_t10187	alpha/beta-Hydrolase	1150	2.53805	Up	3.18752e-36	COG0596(S:Function unknown)	COG0596(phosphatidylinositol glycan anchor biosynthesis, class C)	PF00561.20(Abhydrolase_1:alpha/beta hydrolase fold); PF12697.7(Abhydrolase_6:Alpha/beta hydrolase family); PF12146.8(Hydrolase_4:Serine aminopeptidase, S33); PF01738.18(DLH:Dienelactone hydrolase family); PF00975.20(Thioesterase:Thioesterase domain)	sp|Q9KWQ6|HSAD_RHOJR(4,5:9,10-diseco-3-hydroxy-5,9,17-trioxoandrosta-1(10),2-diene-4-oate hydrolase OS=Rhodococcus jostii (strain RHA1) OX=101510 GN=hsaD PE=1 SV=1)
8969	gm1.4525_g	hypothetical protein	1275	2.53239	Up	1.81824e-15	ENOG410ZTV3(S:Function unknown)	ENOG410ZTV3(-)	PF09995.9(DUF2236:Uncharacterized protein conserved in bacteria (DUF2236))	sp|F1DBA8|MPAB_PENBR(Mycophenolic acid synthesis protein B OS=Penicillium brevicompactum OX=5074 GN=mpaB PE=3 SV=1)
39427	fgenesh1_pg.34_#_25	FAD/NAD(P)-binding domain-containing protein	1359	2.52804	Up	5.6627e-22	COG0654(S:Function unknown)	COG0654(Domain of unknown function (DUF3328))	PF01494.19(FAD_binding_3:FAD binding domain); PF01266.24(DAO:FAD dependent oxidoreductase)	sp|P23262|NHG1_PSEPU(Salicylate hydroxylase OS=Pseudomonas putida OX=303 GN=nahG PE=1 SV=4)
128386	fgenesh1_pm.4_#_383	alpha-mannosidase	3234	2.52753	Up	4.7115e-93	COG0383(G:Carbohydrate transport and metabolism)	COG0383(alpha-mannosidase)	PF01074.22(Glyco_hydro_38N:Glycosyl hydrolases family 38 N-terminal domain); PF07748.13(Glyco_hydro_38C:Glycosyl hydrolases family 38 C-terminal domain); PF09261.11(Alpha-mann_mid:Alpha mannosidase middle domain); PF17677.1(Glyco_hydro38C2:Glycosyl hydrolases family 38 C-terminal beta sandwich domain)	sp|Q9UT61|MAN1_SCHPO(Alpha-mannosidase OS=Schizosaccharomyces pombe (strain 972 / ATCC 24843) OX=284812 GN=ams1 PE=3 SV=1)
77486	e_gw1.6.1062.1	putative nonribosomal peptide synthase GliP-like	6441	2.52356	Up	1.88532e-19	ENOG410XPD8(Q:Secondary metabolites biosynthesis, transport and catabolism); COG1020(Q:Secondary metabolites biosynthesis, transport and catabolism)	ENOG410XPD8(nonribosomal peptide); COG1020(non-ribosomal peptide synthetase)	PF00501.28(AMP-binding:AMP-binding enzyme); PF00668.20(Condensation:Condensation domain); PF00550.25(PP-binding:Phosphopantetheine attachment site); PF13193.6(AMP-binding_C:AMP-binding enzyme C-terminal domain)	sp|Q6Q883|SIRP_LEPMC(Nonribosomal peptide synthetase sirP OS=Leptosphaeria maculans OX=5022 GN=sirP PE=2 SV=1)
95942	estExt_Genewise1Plus.C_2_t40239	hypothetical protein	1187	2.52221	Up	1.23514e-52	ENOG410XPBZ(S:Function unknown)	ENOG410XPBZ(GPN-loop GTPase 3)	PF03029.17(ATP_bind_1:Conserved hypothetical ATP binding protein); PF16575.5(CLP1_P:mRNA cleavage and polyadenylation factor CLP1 P-loop); PF13173.6(AAA_14:AAA domain)	sp|Q4IQT8|GPN3_GIBZE(GPN-loop GTPase 3 OS=Gibberella zeae (strain PH-1 / ATCC MYA-4620 / FGSC 9075 / NRRL 31084) OX=229533 GN=FGRRES_15740 PE=3 SV=1)
87433	e_gw1.21.409.1	hypothetical protein	786	2.51907	Up	5.79362e-07	ENOG4110XNQ(S:Function unknown)	ENOG4110XNQ(-)
72409	e_gw1.3.682.1	Carboxypeptidase S	1716	2.51623	Up	1.80707e-173	COG0624(S:Function unknown)	COG0624(-)	PF01546.28(Peptidase_M20:Peptidase family M20/M25/M40); PF07687.14(M20_dimer:Peptidase dimerisation domain)	sp|O13968|YE48_SCHPO(Uncharacterized carboxypeptidase C24C9.08 OS=Schizosaccharomyces pombe (strain 972 / ATCC 24843) OX=284812 GN=SPAC24C9.08 PE=3 SV=1)
9212	gm1.4768_g	Inosine monophosphate dehydrogenase	1092	2.50981	Up	3.99032e-31	ENOG41128KJ(S:Function unknown)	ENOG41128KJ(Pfam:NPD)	PF03060.15(NMO:Nitronate monooxygenase); PF00478.25(IMPDH:IMP dehydrogenase / GMP reductase domain)	sp|Q01284|2NPD_NEUCR(Nitronate monooxygenase OS=Neurospora crassa (strain ATCC 24698 / 74-OR23-1A / CBS 708.71 / DSM 1257 / FGSC 987) OX=367110 GN=ncd-2 PE=1 SV=1)
36747	fgenesh1_pg.14_#_26	hypothetical protein	831	2.50771	Up	0	ENOG41114S1(S:Function unknown); COG0330(S:Function unknown)	ENOG41114S1(Methyltransferase domain); COG0330(Methyltransferase domain)	PF01145.25(Band_7:SPFH domain / Band 7 family)	sp|P50085|PHB2_YEAST(Prohibitin-2 OS=Saccharomyces cerevisiae (strain ATCC 204508 / S288c) OX=559292 GN=PHB2 PE=1 SV=2)
34423	fgenesh1_pg.5_#_362	hypothetical protein	4626	2.50553	Up	3.72694e-10	COG0417(L:Replication, recombination and repair)	COG0417(DNA polymerase)	PF00136.21(DNA_pol_B:DNA polymerase family B); PF03104.19(DNA_pol_B_exo1:DNA polymerase family B, exonuclease domain); PF14260.6(zf-C4pol:C4-type zinc-finger of DNA polymerase delta)	sp|P14284|DPOZ_YEAST(DNA polymerase zeta catalytic subunit OS=Saccharomyces cerevisiae (strain ATCC 204508 / S288c) OX=559292 GN=REV3 PE=1 SV=1)
77202	e_gw1.6.441.1	hypothetical protein	1701	2.5008	Up	5.79362e-07	ENOG410Y9VK(S:Function unknown)	ENOG410Y9VK(Transcription factor)	PF04082.18(Fungal_trans:Fungal specific transcription factor domain)	sp|B8NJG9|LEPE_ASPFN(Transcription factor lepE OS=Aspergillus flavus (strain ATCC 200026 / FGSC A1120 / NRRL 3357 / JCM 12722 / SRRC 167) OX=332952 GN=lepB PE=3 SV=1)
102019	estExt_Genewise1Plus.C_17_t20040	hypothetical protein	2057	2.49985	Up	8.91058e-54	ENOG410XQHW(K:Transcription)	ENOG410XQHW(Transcription factor)	PF04082.18(Fungal_trans:Fungal specific transcription factor domain); PF00172.18(Zn_clus:Fungal Zn(2)-Cys(6) binuclear cluster domain)	sp|Q9HDX1|YKN4_SCHPO(Uncharacterized transcriptional regulatory protein PB1A11.04c OS=Schizosaccharomyces pombe (strain 972 / ATCC 24843) OX=284812 GN=SPAPB1A11.04c PE=3 SV=1)
115504	estExt_Genewise1.C_270382	dienelactone hydrolase	855	2.49984	Up	2.98598e-187	COG0412(S:Function unknown)	COG0412(transmembrane anterior posterior transformation 1)	PF01738.18(DLH:Dienelactone hydrolase family)	sp|B8M9K0|TROPI_TALSN(Hydrolase tropI OS=Talaromyces stipitatus (strain ATCC 10500 / CBS 375.48 / QM 6759 / NRRL 1006) OX=441959 GN=tropI PE=3 SV=1)
105000	estExt_Genewise1Plus.C_410097	hypothetical protein	4198	2.49679	Up	0	ENOG410XQUQ(S:Function unknown)	ENOG410XQUQ(Involved in proper cytoplasmic distribution of mitochondria (By similarity))	PF13236.6(CLU:Clustered mitochondria); PF12807.7(eIF3_p135:Translation initiation factor eIF3 subunit 135); PF13424.6(TPR_12:Tetratricopeptide repeat); PF15044.6(CLU_N:Mitochondrial function, CLU-N-term); PF13374.6(TPR_10:Tetratricopeptide repeat)	sp|Q2UKX8|CLU_ASPOR(Clustered mitochondria protein homolog OS=Aspergillus oryzae (strain ATCC 42149 / RIB 40) OX=510516 GN=clu1 PE=3 SV=1)
118070	fgenesh2_kg.4_#_2_#_AAP57750.1	Glycoside hydrolase	969	2.49605	Up	1.6125e-161	ENOG410XNWA(G:Carbohydrate transport and metabolism)	ENOG410XNWA(hydrolase family 62 protein)	PF03664.13(Glyco_hydro_62:Glycosyl hydrolase family 62)	sp|Q5AUX2|AXHA2_EMENI(Alpha-L-arabinofuranosidase axhA-2 OS=Emericella nidulans (strain FGSC A4 / ATCC 38163 / CBS 112.46 / NRRL 194 / M139) OX=227321 GN=axhA-2 PE=1 SV=1)
111181	estExt_Genewise1.C_10_t10087	hypothetical protein	859	2.49517	Up	0.00023574	ENOG4110TRB(S:Function unknown)	ENOG4110TRB(Heterokaryon incompatibility protein (HET))
67965	e_gw1.1.2526.1	glucuronan lyase A	777	2.48938	Up	0.00023574	ENOG410XRJ4(S:Function unknown)	ENOG410XRJ4(-)	PF14099.6(Polysacc_lyase:Polysaccharide lyase)
101515	estExt_Genewise1Plus.C_15_t20018	DUF1941 family protein	1917	2.48217	Up	2.5989e-60	ENOG4112CZD(S:Function unknown)	ENOG4112CZD(Neurochondrin)	PF05536.11(Neurochondrin:Neurochondrin); PF08167.12(RIX1:rRNA processing/ribosome biogenesis)	sp|O74447|YCG2_SCHPO(Uncharacterized protein C16C4.02c OS=Schizosaccharomyces pombe (strain 972 / ATCC 24843) OX=284812 GN=SPCC16C4.02c PE=1 SV=1)
52736	gw1.7.600.1	hypothetical protein	1056	2.48047	Up	1.4881e-14	ENOG410YA2J(S:Function unknown); ENOG410YFC6(S:Function unknown)	ENOG410YA2J(Conserved hypothetical, protein); ENOG410YFC6(-)
82112	e_gw1.12.134.1	GPI-anchored wall transfer protein 1	1482	2.47649	Up	3.42122e-46	COG5062(S:Function unknown)	COG5062(Phosphatidylinositol glycan anchor biosynthesis, class W)	PF06423.12(GWT1:GWT1)	sp|Q4IQ08|GWT1_GIBZE(GPI-anchored wall transfer protein 1 OS=Gibberella zeae (strain PH-1 / ATCC MYA-4620 / FGSC 9075 / NRRL 31084) OX=229533 GN=GWT1 PE=3 SV=1)
132519	fgenesh1_pm.18_#_176	Ankyrin	3912	2.46574	Up	1.84087e-43	ENOG4111BSN(S:Function unknown); COG0775(F:Nucleotide transport and metabolism)	ENOG4111BSN(-); COG0775(Catalyzes the irreversible cleavage of the glycosidic bond in both 5'-methylthioadenosine (MTA) and S- adenosylhomocysteine (SAH AdoHcy) to adenine and the corresponding thioribose, 5'-methylthioribose and S-ribosylhomocysteine, respectively (By similarity))	PF12796.7(Ank_2:Ankyrin repeats (3 copies)); PF13857.6(Ank_5:Ankyrin repeats (many copies)); PF13637.6(Ank_4:Ankyrin repeats (many copies)); PF05729.12(NACHT:NACHT domain); PF13191.6(AAA_16:AAA ATPase domain); PF13401.6(AAA_22:AAA domain)	sp|Q00808|HETE1_PODAS(Vegetative incompatibility protein HET-E-1 OS=Podospora anserina OX=5145 GN=HET-E1 PE=4 SV=1)
78171	e_gw1.7.1084.1	hypothetical protein	1869	2.46151	Up	1.12707e-38	COG0064(J:Translation, ribosomal structure and biogenesis)	COG0064(Allows the formation of correctly charged Asn-tRNA(Asn) or Gln-tRNA(Gln) through the transamidation of misacylated Asp- tRNA(Asn) or Glu-tRNA(Gln) in organisms which lack either or both of asparaginyl-tRNA or glutaminyl-tRNA synthetases. The reaction takes place in the presence of glutamine and ATP through an activated phospho-Asp-tRNA(Asn) or phospho-Glu-tRNA(Gln) (By similarity))	PF02934.15(GatB_N:GatB/GatE catalytic domain); PF02637.18(GatB_Yqey:GatB domain)	sp|C7YPY3|GATB_NECH7(Glutamyl-tRNA(Gln) amidotransferase subunit B, mitochondrial OS=Nectria haematococca (strain 77-13-4 / ATCC MYA-4622 / FGSC 9596 / MPVI) OX=660122 GN=NECHADRAFT_39102 PE=3 SV=1)
81817	e_gw1.11.332.1	expressed protein	1425	2.46113	Up	3.2049e-08	ENOG4112719(S:Function unknown)	ENOG4112719(-)
81017	e_gw1.10.606.1	hypothetical protein	2499	2.46105	Up	2.50802e-14	ENOG410YG2B(S:Function unknown)	ENOG410YG2B(protein required for cell viability)	PF10363.9(RTP1_C1:Required for nuclear transport of RNA pol II C-terminus 1); PF10304.9(RTP1_C2:Required for nuclear transport of RNA pol II C-terminus 2); PF09738.9(LRRFIP:LRRFIP family)	sp|O42977|RTP1_SCHPO(RNA polymerase II assembly factor rtp1 OS=Schizosaccharomyces pombe (strain 972 / ATCC 24843) OX=284812 GN=rtp1 PE=3 SV=1)
69792	e_gw1.1.1218.1	hypothetical protein	2595	2.45943	Up	2.1332e-11	ENOG41128I6(B:Chromatin structure and dynamics)	ENOG41128I6(Regulatory subunit of the slx1-slx4 structure-specific endonuclease that resolves DNA secondary structures generated during DNA repair and recombination. Has endonuclease activity towards branched DNA substrates, introducing single-strand cuts in duplex DNA close to junctions with ss-DNA (By similarity))	PF09494.10(Slx4:Slx4 endonuclease)	sp|A4R1T1|SLX4_MAGO7(Structure-specific endonuclease subunit SLX4 OS=Magnaporthe oryzae (strain 70-15 / ATCC MYA-4617 / FGSC 8958) OX=242507 GN=SLX4 PE=3 SV=3)
84735	e_gw1.16.252.1	hypothetical protein	2244	2.45563	Up	5.36254e-21	ENOG410Y9HJ(S:Function unknown)	ENOG410Y9HJ(Fungal_trans)	PF04082.18(Fungal_trans:Fungal specific transcription factor domain); PF00172.18(Zn_clus:Fungal Zn(2)-Cys(6) binuclear cluster domain)	sp|A0A0E4AZF8|FSA6_FUSSF(Fusarisetin A cluster transcription factor fsa6 OS=Fusarium sp. (strain FN080326) OX=1608308 GN=fsa6 PE=4 SV=1)
77359	e_gw1.6.881.1	hypothetical protein	3030	2.44931	Up	7.57784e-09	ENOG4111DXH(K:Transcription)	ENOG4111DXH(transcription factor)	PF09734.9(Tau95:RNA polymerase III transcription factor (TF)IIIC subunit HTH domain); PF17682.1(Tau95_N:Tau95 Triple barrel domain); PF00096.26(zf-C2H2:Zinc finger, C2H2 type)	sp|O14229|SFC1_SCHPO(Transcription factor tau subunit sfc1 OS=Schizosaccharomyces pombe (strain 972 / ATCC 24843) OX=284812 GN=sfc1 PE=1 SV=2)
7181	gm1.2737_g	hypothetical protein	1707	2.44701	Up	1.22733e-12	ENOG410YVCF(S:Function unknown); ENOG410XT93(S:Function unknown)	ENOG410YVCF(-); ENOG410XT93(-)	PF11951.8(Fungal_trans_2:Fungal specific transcription factor domain)
72994	e_gw1.3.1675.1	hypothetical protein	1764	2.43839	Up	1.77524e-18	ENOG4111HVC(S:Function unknown)	ENOG4111HVC(C6 finger domain protein Acr-2)	PF11951.8(Fungal_trans_2:Fungal specific transcription factor domain); PF00172.18(Zn_clus:Fungal Zn(2)-Cys(6) binuclear cluster domain)	sp|P78704|ACR2_NEUCR(Acriflavine sensitivity control protein acr-2 OS=Neurospora crassa (strain ATCC 24698 / 74-OR23-1A / CBS 708.71 / DSM 1257 / FGSC 987) OX=367110 GN=acr-2 PE=3 SV=3)
143335	estExt_fgenesh1_pg.C_440020	hypothetical protein	1084	2.43604	Up	3.92532e-82	COG5152(S:Function unknown)	COG5152(Ring finger protein)	PF13920.6(zf-C3HC4_3:Zinc finger, C3HC4 type (RING finger)); PF00097.25(zf-C3HC4:Zinc finger, C3HC4 type (RING finger)); PF13445.6(zf-RING_UBOX:RING-type zinc-finger); PF14634.6(zf-RING_5:zinc-RING finger domain); PF13923.6(zf-C3HC4_2:Zinc finger, C3HC4 type (RING finger)); PF16685.5(zf-RING_10:zinc RING finger of MSL2); PF13639.6(zf-RING_2:Ring finger domain)	sp|Q7SDY3|CWC24_NEUCR(Pre-mRNA-splicing factor cwc-24 OS=Neurospora crassa (strain ATCC 24698 / 74-OR23-1A / CBS 708.71 / DSM 1257 / FGSC 987) OX=367110 GN=cwc-24 PE=3 SV=1)
77048	e_gw1.6.459.1	Phosphoenolpyruvate/pyruvate domain-containing protein	840	2.43416	Up	1.2187e-05	COG2513(G:Carbohydrate transport and metabolism)	COG2513(methylisocitrate lyase)	PF13714.6(PEP_mutase:Phosphoenolpyruvate phosphomutase)	sp|P9WLN8|Y1998_MYCTO(Uncharacterized protein MT2054 OS=Mycobacterium tuberculosis (strain CDC 1551 / Oshkosh) OX=83331 GN=MT2054 PE=2 SV=1)
102220	estExt_Genewise1Plus.C_18_t10349	hypothetical protein	1583	2.4293	Up	6.30204e-70	ENOG410XZRR(S:Function unknown)	ENOG410XZRR(integral membrane protein)	PF10355.9(Ytp1:Protein of unknown function (Ytp1)); PF10348.9(DUF2427:Domain of unknown function (DUF2427))	sp|P53584|YTP1_YEAST(Protein YTP1 OS=Saccharomyces cerevisiae (strain ATCC 204508 / S288c) OX=559292 GN=YTP1 PE=1 SV=1)
122629	estExt_fgenesh2_kg.C_40175	expressed protein	459	2.41997	Up	3.46502e-12
39417	fgenesh1_pg.34_#_15	hypothetical protein	1230	2.41564	Up	5.26404e-23	ENOG4111R90(S:Function unknown)	ENOG4111R90(integral membrane protein)	PF04666.13(Glyco_transf_54:N-Acetylglucosaminyltransferase-IV (GnT-IV) conserved region)
99296	estExt_Genewise1Plus.C_9_t10311	glucose-6-phosphate 1-dehydrogenase	1690	2.41263	Up	0	COG0364(G:Carbohydrate transport and metabolism)	COG0364(Glucose-6-phosphate 1-dehydrogenase)	PF02781.16(G6PD_C:Glucose-6-phosphate dehydrogenase, C-terminal domain); PF00479.22(G6PD_N:Glucose-6-phosphate dehydrogenase, NAD binding domain)	sp|P48826|G6PD_ASPNG(Glucose-6-phosphate 1-dehydrogenase OS=Aspergillus niger OX=5061 GN=gsdA PE=2 SV=1)
37798	fgenesh1_pg.19_#_123	oxidoreductase FAD-binding protein	1929	2.41143	Up	0.000401704	COG3576(S:Function unknown)	COG3576(pyridoxamine 5'-phosphate oxidase-related, FMN-binding)	PF00970.24(FAD_binding_6:Oxidoreductase FAD-binding domain); PF01243.20(Putative_PNPOx:Pyridoxamine 5'-phosphate oxidase); PF00175.21(NAD_binding_1:Oxidoreductase NAD-binding domain)
7543	gm1.3099_g	hypothetical protein	1023	2.41028	Up	3.02198e-09	ENOG41118R0(S:Function unknown)	ENOG41118R0(Fungal Zn(2)-Cys(6) binuclear cluster domain)
136705	estExt_fgenesh1_pm.C_60030	cytosolic Fe-S cluster assembling factor cfd1	976	2.40534	Up	2.32e-214	COG0489(D:Cell cycle control, cell division, chromosome partitioning)	COG0489(ATP-binding protein)	PF10609.9(ParA:NUBPL iron-transfer P-loop NTPase); PF01656.23(CbiA:CobQ/CobB/MinD/ParA nucleotide binding domain); PF09140.11(MipZ:ATPase MipZ); PF13614.6(AAA_31:AAA domain); PF02374.15(ArsA_ATPase:Anion-transporting ATPase)	sp|Q4I174|CFD1_GIBZE(Cytosolic Fe-S cluster assembly factor CFD1 OS=Gibberella zeae (strain PH-1 / ATCC MYA-4620 / FGSC 9075 / NRRL 31084) OX=229533 GN=CFD1 PE=3 SV=2)
129578	fgenesh1_pm.7_#_251	hypothetical protein	993	2.40336	Up	9.02436e-05	ENOG4111MD4(S:Function unknown); ENOG41118CN(S:Function unknown)	ENOG4111MD4(-); ENOG41118CN(-)		sp|A0A084B9Z2|SAT4_STACB(Satratoxin biosynthesis SC1 cluster protein 4 OS=Stachybotrys chartarum (strain CBS 109288 / IBT 7711) OX=1280523 GN=SAT4 PE=3 SV=1)
90843	e_gw1.30.37.1	major facilitator superfamily transporter	1347	2.40296	Up	9.02436e-05	ENOG411009T(U:Intracellular trafficking, secretion, and vesicular transport); COG0477(U:Intracellular trafficking, secretion, and vesicular transport)	ENOG411009T(Major Facilitator Superfamily); COG0477(Major Facilitator Superfamily)	PF07690.16(MFS_1:Major Facilitator Superfamily)	sp|Q5ATG7|APDF_EMENI(Aspyridones efflux protein apdF OS=Emericella nidulans (strain FGSC A4 / ATCC 38163 / CBS 112.46 / NRRL 194 / M139) OX=227321 GN=apdF PE=2 SV=1)
57582	gw1.19.403.1	homoserine O-acetyltransferase	1515	2.40218	Up	6.23798e-91	COG2021(S:Function unknown)	COG2021(-)	PF00561.20(Abhydrolase_1:alpha/beta hydrolase fold); PF00756.20(Esterase:Putative esterase)	sp|A0A1D3PCM3|SST_EMEND(Serine O-succinyltransferase OS=Emericella nidulans OX=162425 GN=CysA PE=1 SV=1)
67839	e_gw1.1.1551.1	hypothetical protein	2268	2.40088	Up	1.2187e-05	ENOG4111K1U(S:Function unknown)	ENOG4111K1U(GAL4)	PF04082.18(Fungal_trans:Fungal specific transcription factor domain); PF00172.18(Zn_clus:Fungal Zn(2)-Cys(6) binuclear cluster domain)	sp|B8NJG9|LEPE_ASPFN(Transcription factor lepE OS=Aspergillus flavus (strain ATCC 200026 / FGSC A1120 / NRRL 3357 / JCM 12722 / SRRC 167) OX=332952 GN=lepB PE=3 SV=1)
89651	e_gw1.26.141.1	Alkaline phosphatase-like protein	1827	2.39232	Up	5.07046e-09	COG3119(S:Function unknown)	COG3119(-)	PF00884.23(Sulfatase:Sulfatase)	sp|P51691|ARS_PSEAE(Arylsulfatase OS=Pseudomonas aeruginosa (strain ATCC 15692 / DSM 22644 / CIP 104116 / JCM 14847 / LMG 12228 / 1C / PRS 101 / PAO1) OX=208964 GN=atsA PE=1 SV=3)
75160	e_gw1.5.1047.1	anaphase-promoting complex protein	2385	2.38773	Up	3.37726e-18	ENOG410YVZN(O:Posttranslational modification, protein turnover, chaperones)	ENOG410YVZN(complex subunit)	PF12862.7(ANAPC5:Anaphase-promoting complex subunit 5); PF14559.6(TPR_19:Tetratricopeptide repeat)	sp|Q9P4W7|APC5_SCHPO(Anaphase-promoting complex subunit 5 OS=Schizosaccharomyces pombe (strain 972 / ATCC 24843) OX=284812 GN=apc5 PE=1 SV=3)
133906	fgenesh1_pm.27_#_110	hypothetical protein	1743	2.38773	Up	1.70614e-10	ENOG4111UA1(S:Function unknown)	ENOG4111UA1(-)	PF00170.21(bZIP_1:bZIP transcription factor)
25312	estExt_Genemark1.C_110176	hypothetical protein	2172	2.3872	Up	9.65908e-17	ENOG4111BPJ(S:Function unknown); ENOG4110VJG(S:Function unknown)	ENOG4111BPJ(-); ENOG4110VJG(-)
36636	fgenesh1_pg.13_#_136	putative cytochrome c oxidase assembly protein	1404	2.38698	Up	4.08352e-234	COG1612(O:Posttranslational modification, protein turnover, chaperones)	COG1612(Catalyzes the oxidation of the C8 methyl side group on heme O porphyrin ring into a formyl group (By similarity))	PF02628.15(COX15-CtaA:Cytochrome oxidase assembly protein)	sp|P40086|COX15_YEAST(Cytochrome c oxidase assembly protein COX15 OS=Saccharomyces cerevisiae (strain ATCC 204508 / S288c) OX=559292 GN=COX15 PE=3 SV=1)
36769	fgenesh1_pg.14_#_48	hypothetical protein	993	2.3794	Up	9.71396e-12	ENOG4111TEB(S:Function unknown)	ENOG4111TEB(conserved hypothetical protein)	PF13300.6(DUF4078:Domain of unknown function (DUF4078))	sp|Q9P7B7|YK24_SCHPO(Uncharacterized protein C140.04 OS=Schizosaccharomyces pombe (strain 972 / ATCC 24843) OX=284812 GN=SPAC140.04 PE=1 SV=1)
74156	e_gw1.4.741.1	hypothetical protein	2124	2.37803	Up	2.48146e-43	ENOG410XPKN(S:Function unknown)	ENOG410XPKN(Engulfment and cell motility)	PF04727.13(ELMO_CED12:ELMO/CED-12 family); PF16457.5(PH_12:Pleckstrin homology domain); PF11841.8(DUF3361:Domain of unknown function (DUF3361))	sp|A4FUD6|ELMO2_BOVIN(Engulfment and cell motility protein 2 OS=Bos taurus OX=9913 GN=ELMO2 PE=2 SV=1)
126960	fgenesh1_pm.2_#_285	ATPases NBP35	1026	2.37702	Up	3.3515e-69	COG0489(S:Function unknown)	COG0489(glia maturation factor)	PF10609.9(ParA:NUBPL iron-transfer P-loop NTPase); PF01656.23(CbiA:CobQ/CobB/MinD/ParA nucleotide binding domain); PF13614.6(AAA_31:AAA domain); PF03193.16(RsgA_GTPase:RsgA GTPase); PF02374.15(ArsA_ATPase:Anion-transporting ATPase)	sp|Q4HZ34|NBP35_GIBZE(Cytosolic Fe-S cluster assembly factor NBP35 OS=Gibberella zeae (strain PH-1 / ATCC MYA-4620 / FGSC 9075 / NRRL 31084) OX=229533 GN=NBP35 PE=3 SV=1)
73560	e_gw1.3.388.1	transferase hexapeptide domain-containing protein	582	2.37665	Up	2.3238e-12	ENOG41100G7(S:Function unknown)	ENOG41100G7(transferase hexapeptide domain protein)	PF00132.24(Hexapep:Bacterial transferase hexapeptide (six repeats)); PF14602.6(Hexapep_2:Hexapeptide repeat of succinyl-transferase); PF07959.12(Fucokinase:L-fucokinase)
139166	estExt_fgenesh1_pm.C_290097	hypothetical protein	665	2.37518	Up	3.29692e-19	ENOG410Z08V(S:Function unknown)	ENOG410Z08V(-)
33190	fgenesh1_pg.3_#_68	hypothetical protein	1584	2.37126	Up	1.53101e-07	ENOG41114CQ(S:Function unknown)	ENOG41114CQ(-)
81339	e_gw1.11.319.1	hypothetical protein	1191	2.36878	Up	3.59774e-08	ENOG41113VR(S:Function unknown); ENOG410YF6S(S:Function unknown)	ENOG41113VR(Fungal Zn(2)-Cys(6) binuclear cluster domain); ENOG410YF6S(Fungal Zn(2)-Cys(6) binuclear cluster domain)	PF00172.18(Zn_clus:Fungal Zn(2)-Cys(6) binuclear cluster domain)	sp|D7PI10|GSFR2_PENAE(Transcription factor gsfR2 OS=Penicillium aethiopicum OX=36650 GN=gsfR2 PE=1 SV=1)
85903	e_gw1.18.187.1	hypothetical protein	1632	2.36751	Up	8.48692e-09	ENOG410YXWT(S:Function unknown); ENOG410XNQK(S:Function unknown)	ENOG410YXWT(Fungal specific transcription factor domain); ENOG410XNQK(Fungal specific transcription factor domain)	PF04082.18(Fungal_trans:Fungal specific transcription factor domain)
68750	e_gw1.1.125.1	hypothetical protein	1473	2.36657	Up	5.56726e-13	COG1275(S:Function unknown)	COG1275(Conserved hypothetical, protein)	PF03595.17(SLAC1:Voltage-dependent anion channel)	sp|P50537|MAE1_SCHPO(Malic acid transport protein OS=Schizosaccharomyces pombe (strain 972 / ATCC 24843) OX=284812 GN=mae1 PE=1 SV=1)
86591	e_gw1.19.265.1	hypothetical protein	870	2.36522	Up	1.11462e-15	ENOG4110WBN(S:Function unknown)	ENOG4110WBN(-)	PF17784.1(Sulfotransfer_4:Sulfotransferase domain); PF13469.6(Sulfotransfer_3:Sulfotransferase family)
71645	e_gw1.2.1321.1	hypothetical protein	978	2.36347	Up	4.73344e-06	COG0494(S:Function unknown)	COG0494(NADH-ubiquinone oxidoreductase 178 kDa subunit)	PF00293.28(NUDIX:NUDIX domain)	sp|P47173|YJ9J_YEAST(Uncharacterized protein YJR142W OS=Saccharomyces cerevisiae (strain ATCC 204508 / S288c) OX=559292 GN=YJR142W PE=1 SV=1)
94413	estExt_Genewise1Plus.C_1_t30463	WD domain-containing protein	1381	2.35693	Up	4.76672e-10	COG2319(S:Function unknown)	COG2319(-)		sp|A7UWE6|ASA1_NEUCR(ASTRA-associated protein 1 OS=Neurospora crassa (strain ATCC 24698 / 74-OR23-1A / CBS 708.71 / DSM 1257 / FGSC 987) OX=367110 GN=asa-1 PE=3 SV=1)
131954	fgenesh1_pm.16_#_56	expressed protein	258	2.35492	Up	0.000152165
103366	estExt_Genewise1Plus.C_240238	FAD/NAD(P)-binding domain-containing protein	1234	2.3544	Up	4.05618e-54	COG0492(S:Function unknown)	COG0492(o-methyltransferase)	PF07992.14(Pyr_redox_2:Pyridine nucleotide-disulphide oxidoreductase); PF00890.24(FAD_binding_2:FAD binding domain)	sp|M1W428|TCPT_CLAP2(Thioredoxin reductase tcpT OS=Claviceps purpurea (strain 20.1) OX=1111077 GN=tcpT PE=2 SV=1)
77932	e_gw1.7.1004.1	FAD-binding domain-containing protein	1716	2.35343	Up	4.47164e-16	ENOG410XT36(S:Function unknown)	ENOG410XT36(FAD FMN-containing isoamyl alcohol oxidase MreA)	PF01565.23(FAD_binding_4:FAD binding domain); PF08031.12(BBE:Berberine and berberine like)	sp|A0A0E0RTV6|ZEB1_GIBZE(FAD-linked oxidoreductase ZEB1 OS=Gibberella zeae (strain PH-1 / ATCC MYA-4620 / FGSC 9075 / NRRL 31084) OX=229533 GN=ZEB1 PE=2 SV=2)
7301	gm1.2857_g	hypothetical protein	2082	2.35295	Up	1.09822e-06	ENOG410YE11(S:Function unknown)	ENOG410YE11(-)	PF04082.18(Fungal_trans:Fungal specific transcription factor domain)
34621	fgenesh1_pg.6_#_196	hypothetical protein	948	2.35267	Up	0.000152165	ENOG410YYG0(S:Function unknown)	ENOG410YYG0(-)
74927	e_gw1.4.661.1	putative alpha-tubulin suppressor protein Aats1	1086	2.34852	Up	5.34034e-14	COG5184(E:Amino acid transport and metabolism)	COG5184(prephenate dehydrogenase)	PF00415.18(RCC1:Regulator of chromosome condensation (RCC1) repeat); PF13540.6(RCC1_2:Regulator of chromosome condensation (RCC1) repeat)	sp|O42645|YF94_SCHPO(RCC1 repeat-containing protein C10F6.04 OS=Schizosaccharomyces pombe (strain 972 / ATCC 24843) OX=284812 GN=SPAC10F6.04 PE=4 SV=1)
89220	e_gw1.25.195.1	hypothetical protein	291	2.34241	Up	3.70046e-13	ENOG410Z2MP(S:Function unknown)	ENOG410Z2MP(-)	PF10906.8(Mrx7:MIOREX complex component 7)
80667	e_gw1.10.29.1	hypothetical protein	1101	2.34179	Up	2.56378e-07	ENOG410XRIA(S:Function unknown)	ENOG410XRIA(Chromosome 9 open reading frame 64)	PF10343.9(Q_salvage:Potential Queuosine, Q, salvage protein family)	sp|Q9HDZ9|QSPP_SCHPO(Queuosine salvage protein OS=Schizosaccharomyces pombe (strain 972 / ATCC 24843) OX=284812 GN=SPAC589.05c PE=3 SV=1)
103650	estExt_Genewise1Plus.C_260224	catalase/peroxidase HPI	2572	2.33923	Up	0	COG0376(S:Function unknown)	COG0376(Conserved hypothetical, protein)	PF00141.23(peroxidase:Peroxidase)	sp|Q2TW34|KATG_ASPOR(Catalase-peroxidase OS=Aspergillus oryzae (strain ATCC 42149 / RIB 40) OX=510516 GN=katG PE=3 SV=1)
96226	estExt_Genewise1Plus.C_3_t10334	DNA repair protein	3510	2.33914	Up	4.49682e-11	COG0389(S:Function unknown)	COG0389(Conserved hypothetical, protein)	PF00817.20(IMS:impB/mucB/samB family); PF16727.5(REV1_C:DNA repair protein REV1 C-terminal domain); PF11799.8(IMS_C:impB/mucB/samB family C-terminal domain); PF14377.6(UBM:Ubiquitin binding region); PF16589.5(BRCT_2:BRCT domain, a BRCA1 C-terminus domain); PF18182.1(mCpol:minimal CRISPR polymerase domain)	sp|O94623|REV1_SCHPO(DNA repair protein rev1 OS=Schizosaccharomyces pombe (strain 972 / ATCC 24843) OX=284812 GN=rev1 PE=3 SV=3)
129874	fgenesh1_pm.8_#_117	NifU-like domain-containing protein	885	2.33834	Up	3.31488e-186	COG0694(O:Posttranslational modification, protein turnover, chaperones)	COG0694(metallo-sulfur cluster assembly)	PF08712.11(Nfu_N:Scaffold protein Nfu/NifU N terminal); PF01106.17(NifU:NifU-like domain)	sp|Q9UUB8|YH9J_SCHPO(NifU-like protein C1709.19c OS=Schizosaccharomyces pombe (strain 972 / ATCC 24843) OX=284812 GN=SPBC1709.19c PE=3 SV=1)
142201	estExt_fgenesh1_pg.C_160085	hypothetical protein	1649	2.32662	Up	1.31743e-28	ENOG410YZY3(S:Function unknown)	ENOG410YZY3(-)
5746	gm1.1302_g	hypothetical protein	1560	2.32193	Up	1.89853e-30	ENOG4111V0A(S:Function unknown)	ENOG4111V0A(-)	PF00646.33(F-box:F-box domain); PF12937.7(F-box-like:F-box-like)
79076	e_gw1.8.55.1	putative DNA repair protein Nse1	993	2.31904	Up	1.83651e-06	ENOG4111RNS(S:Function unknown)	ENOG4111RNS(non-SMC element 1 homolog (S. cerevisiae))	PF07574.13(SMC_Nse1:Nse1 non-SMC component of SMC5-6 complex); PF08746.11(zf-RING-like:RING-like domain)	sp|Q07913|NSE1_YEAST(Non-structural maintenance of chromosomes element 1 OS=Saccharomyces cerevisiae (strain ATCC 204508 / S288c) OX=559292 GN=NSE1 PE=1 SV=1)
126229	fgenesh1_pm.1_#_643	hypothetical protein	1188	2.31775	Up	1.86194e-31	ENOG410XNRC(S:Function unknown)	ENOG410XNRC(GPN-loop GTPase 1)	PF03029.17(ATP_bind_1:Conserved hypothetical ATP binding protein)	sp|O42906|GPN1_SCHPO(GPN-loop GTPase 1 OS=Schizosaccharomyces pombe (strain 972 / ATCC 24843) OX=284812 GN=SPBC119.15 PE=1 SV=1)
69143	e_gw1.1.372.1	Pirin	900	2.31499	Up	4.2802e-07	COG1741(S:Function unknown)	COG1741(CFEM domain protein)	PF02678.16(Pirin:Pirin); PF05726.13(Pirin_C:Pirin C-terminal cupin domain); PF07883.11(Cupin_2:Cupin domain)	sp|O00625|PIR_HUMAN(Pirin OS=Homo sapiens OX=9606 GN=PIR PE=1 SV=1)
104389	estExt_Genewise1Plus.C_310238	Ankyrin	3033	2.31159	Up	8.77442e-29	ENOG410XT1Q(S:Function unknown)	ENOG410XT1Q(Ankyrin Repeat Protein)	PF13637.6(Ank_4:Ankyrin repeats (many copies)); PF12796.7(Ank_2:Ankyrin repeats (3 copies)); PF13606.6(Ank_3:Ankyrin repeat); PF13857.6(Ank_5:Ankyrin repeats (many copies)); PF00023.30(Ank:Ankyrin repeat)	sp|O75762|TRPA1_HUMAN(Transient receptor potential cation channel subfamily A member 1 OS=Homo sapiens OX=9606 GN=TRPA1 PE=1 SV=3)
131852	fgenesh1_pm.15_#_173	hypothetical protein	3135	2.3113	Up	9.7644e-20	ENOG410XSN6(S:Function unknown)	ENOG410XSN6(TELO2 interacting protein 1)		sp|O94600|TTI1_SCHPO(TEL2-interacting protein 1 OS=Schizosaccharomyces pombe (strain 972 / ATCC 24843) OX=284812 GN=tti1 PE=1 SV=1)
11053	gm1.6609_g	L-galactonate dehydratase	1410	2.30666	Up	2.35982e-08	COG4948(S:Function unknown)	COG4948(-)	PF13378.6(MR_MLE_C:Enolase C-terminal domain-like)	sp|Q0QWS4|LGD1_HYPJE(L-galactonate dehydratase OS=Hypocrea jecorina OX=51453 GN=lgd1 PE=1 SV=1)
92520	e_gw1.40.68.1	SAE2-domain containing protein	1932	2.30633	Up	7.46552e-11	ENOG41124GB(S:Function unknown); COG1194(L:Replication, recombination and repair)	ENOG41124GB(Conserved hypothetical, protein); COG1194(a g-specific adenine glycosylase)	PF08573.10(SAE2:DNA repair protein endonuclease SAE2/CtIP C-terminus)
131027	fgenesh1_pm.12_#_69	hypothetical protein	1806	2.30159	Up	2.36292e-20	ENOG4111T6J(S:Function unknown)	ENOG4111T6J(Conserved hypothetical, protein)	PF13758.6(Prefoldin_3:Prefoldin subunit); PF12927.7(DUF3835:Domain of unknown function (DUF3835))
139452	estExt_fgenesh1_pm.C_410003	putative arsenite methyltransferase	910	2.29624	Up	0.000255276	ENOG410XP5G(S:Function unknown)	ENOG410XP5G(Fungal specific transcription factor domain)	PF13649.6(Methyltransf_25:Methyltransferase domain); PF08241.12(Methyltransf_11:Methyltransferase domain); PF13847.6(Methyltransf_31:Methyltransferase domain); PF13489.6(Methyltransf_23:Methyltransferase domain); PF08242.12(Methyltransf_12:Methyltransferase domain); PF01209.18(Ubie_methyltran:ubiE/COQ5 methyltransferase family); PF05175.14(MTS:Methyltransferase small domain); PF01135.19(PCMT:Prot…	sp|O13871|YE16_SCHPO(Uncharacterized methyltransferase C1B3.06c OS=Schizosaccharomyces pombe (strain 972 / ATCC 24843) OX=284812 GN=SPAC1B3.06c PE=3 SV=1)
87178	e_gw1.20.88.1	hypothetical protein	804	2.29251	Up	1.32401e-05	ENOG410XZTH(S:Function unknown)	ENOG410XZTH(Protein of unknown function (DUF3716))	PF12511.8(DUF3716:Protein of unknown function (DUF3716))
101349	estExt_Genewise1Plus.C_15_t10148	intramembrane protease	1632	2.29213	Up	8.21102e-32	ENOG410XTES(U:Intracellular trafficking, secretion, and vesicular transport)	ENOG410XTES(signal peptide peptidase)	PF04258.13(Peptidase_A22B:Signal peptide peptidase)	sp|Q6ZGL9|SIP1_ORYSJ(Signal peptide peptidase 1 OS=Oryza sativa subsp. japonica OX=39947 GN=SPP1 PE=2 SV=1)
7560	gm1.3116_g	LexA/Signal peptidase	498	2.29123	Up	0.000255276	COG0681(U:Intracellular trafficking, secretion, and vesicular transport)	COG0681(Signal peptidase i)	PF10502.9(Peptidase_S26:Signal peptidase, peptidase S26); PF00717.23(Peptidase_S24:Peptidase S24-like)	sp|O74800|IMP1_SCHPO(Mitochondrial inner membrane protease subunit 1 OS=Schizosaccharomyces pombe (strain 972 / ATCC 24843) OX=284812 GN=imp1 PE=3 SV=1)
84192	e_gw1.15.432.1	urea active transporter	2034	2.28951	Up	1.34749e-15	COG0591(S:Function unknown)	COG0591(-)	PF00474.17(SSF:Sodium:solute symporter family)	sp|O94469|DUR31_SCHPO(Probable urea active transporter 1 OS=Schizosaccharomyces pombe (strain 972 / ATCC 24843) OX=284812 GN=dur3-1 PE=3 SV=1)
131902	fgenesh1_pm.16_#_4	hypothetical protein	2076	2.28894	Up	9.6913e-14	COG0021(S:Function unknown)	COG0021(Fungal Zn(2)-Cys(6) binuclear cluster domain)	PF00456.21(Transketolase_N:Transketolase, thiamine diphosphate binding domain); PF02779.24(Transket_pyr:Transketolase, pyrimidine binding domain); PF02780.20(Transketolase_C:Transketolase, C-terminal domain); PF13292.6(DXP_synthase_N:1-deoxy-D-xylulose-5-phosphate synthase); PF02775.21(TPP_enzyme_C:Thiamine pyrophosphate enzyme, C-terminal TPP binding domain); PF00676.20(E1_dh:Dehydrogenase E1 co…	sp|O93884|DAS_CANBO(Dihydroxyacetone synthase OS=Candida boidinii OX=5477 GN=DAS1 PE=1 SV=3)
75948	e_gw1.5.159.1	hypothetical protein	720	2.28794	Up	4.03926e-13	ENOG410Z9WH(S:Function unknown); ENOG410Z3WH(S:Function unknown)	ENOG410Z9WH(-); ENOG410Z3WH(GAL4)	PF00172.18(Zn_clus:Fungal Zn(2)-Cys(6) binuclear cluster domain)
98744	estExt_Genewise1Plus.C_8_t10090	hypothetical protein	1926	2.28745	Up	8.66096e-41	COG0303(H:Coenzyme transport and metabolism)	COG0303(Molybdenum cofactor synthesis domain protein)	PF00994.24(MoCF_biosynth:Probable molybdopterin binding domain); PF03453.17(MoeA_N:MoeA N-terminal region (domain I and II)); PF03454.15(MoeA_C:MoeA C-terminal region (domain IV))	sp|Q9NQX3|GEPH_HUMAN(Gephyrin OS=Homo sapiens OX=9606 GN=GPHN PE=1 SV=1)
77655	e_gw1.7.949.1	hypothetical protein	1380	2.28641	Up	4.48228e-45	COG5037(S:Function unknown)	COG5037(Phospholipase/Carboxylesterase)	PF09729.9(Gti1_Pac2:Gti1/Pac2 family)	sp|Q10294|PAC2_SCHPO(cAMP-independent regulatory protein pac2 OS=Schizosaccharomyces pombe (strain 972 / ATCC 24843) OX=284812 GN=pac2 PE=2 SV=1)
89381	e_gw1.26.119.1	hypothetical protein	1527	2.28602	Up	7.69296e-25			PF11951.8(Fungal_trans_2:Fungal specific transcription factor domain)
81418	e_gw1.11.172.1	hypothetical protein	1275	2.28559	Up	4.9765e-53	ENOG410Z3P8(U:Intracellular trafficking, secretion, and vesicular transport)	ENOG410Z3P8(protein transport)	PF11711.8(Tim54:Inner membrane protein import complex subunit Tim54)	sp|Q9C0Q7|TIM54_NEUCR(Mitochondrial import inner membrane translocase subunit tim54 OS=Neurospora crassa (strain ATCC 24698 / 74-OR23-1A / CBS 708.71 / DSM 1257 / FGSC 987) OX=367110 GN=tim54 PE=2 SV=2)
139387	estExt_fgenesh1_pm.C_370036	S-adenosyl-L-methionine-dependent methyltransferase	1248	2.28521	Up	1.86825e-25	COG0500(S:Function unknown)	COG0500(Conserved hypothetical, protein)	PF13489.6(Methyltransf_23:Methyltransferase domain); PF13649.6(Methyltransf_25:Methyltransferase domain); PF08241.12(Methyltransf_11:Methyltransferase domain); PF08242.12(Methyltransf_12:Methyltransferase domain)	sp|Q06668|OMS1_YEAST(Methyltransferase OMS1, mitochondrial OS=Saccharomyces cerevisiae (strain ATCC 204508 / S288c) OX=559292 GN=OMS1 PE=1 SV=1)
70313	e_gw1.2.1011.1	Cysteine proteinase	1803	2.28428	Up	8.66096e-41	ENOG410ZFKJ(O:Posttranslational modification, protein turnover, chaperones)	ENOG410ZFKJ(ubiquitin carboxyl-terminal hydrolase)	PF00443.29(UCH:Ubiquitin carboxyl-terminal hydrolase); PF13423.6(UCH_1:Ubiquitin carboxyl-terminal hydrolase)	sp|P0CAQ1|UBP16_EMENI(Ubiquitin carboxyl-terminal hydrolase 16 OS=Emericella nidulans (strain FGSC A4 / ATCC 38163 / CBS 112.46 / NRRL 194 / M139) OX=227321 GN=ubp16 PE=3 SV=1)
84791	e_gw1.16.556.1	fungal-specific transcription factor domain-containing protein	2655	2.28357	Up	4.84392e-65	ENOG410XTI3(K:Transcription)	ENOG410XTI3(fungal specific transcription factor)	PF04082.18(Fungal_trans:Fungal specific transcription factor domain); PF00172.18(Zn_clus:Fungal Zn(2)-Cys(6) binuclear cluster domain)	sp|Q5SBL4|FSDR_FUSHE(Fusaridione A cluster transcription factor fsdR OS=Fusarium heterosporum OX=42747 GN=fsdR PE=4 SV=2)
47483	gw1.5.255.1	hypothetical protein	1113	2.2831	Up	4.4702e-278	ENOG4111T1C(S:Function unknown)	ENOG4111T1C(SWIRM domain-containing protein)	PF04433.17(SWIRM:SWIRM domain)	sp|P28003|FUN19_YEAST(SWIRM domain-containing protein FUN19 OS=Saccharomyces cerevisiae (strain ATCC 204508 / S288c) OX=559292 GN=FUN19 PE=1 SV=3)
32072	fgenesh1_pg.1_#_561	hypothetical protein	2202	2.28277	Up	1.58523e-28	COG1405(K:Transcription)	COG1405(Stabilizes TBP binding to an archaeal box-A promoter. Also responsible for recruiting RNA polymerase II to the pre- initiation complex (DNA-TBP-TFIIB) (By similarity))	PF00382.19(TFIIB:Transcription factor TFIIB repeat); PF07741.13(BRF1:Brf1-like TBP-binding domain); PF00134.23(Cyclin_N:Cyclin, N-terminal domain)	sp|Q9P6R0|TF3B_SCHPO(Transcription factor IIIB 60 kDa subunit OS=Schizosaccharomyces pombe (strain 972 / ATCC 24843) OX=284812 GN=brf1 PE=1 SV=2)
129719	fgenesh1_pm.7_#_392	SGT1-domain containing protein	1854	2.28255	Up	3.06044e-06	ENOG410XR07(S:Function unknown)	ENOG410XR07(ecdysoneless homolog (Drosophila))	PF07093.11(SGT1:SGT1 protein)	sp|O95905|ECD_HUMAN(Protein ecdysoneless homolog OS=Homo sapiens OX=9606 GN=ECD PE=1 SV=1)
52074	gw1.21.190.1	hypothetical protein	1593	2.2815	Up	9.6913e-14	ENOG410YPKW(S:Function unknown)	ENOG410YPKW(-)
92072	e_gw1.36.142.1	putative sulfatase	2556	2.28134	Up	3.76124e-60	COG1524(S:Function unknown)	COG1524(type i phosphodiesterase nucleotide pyrophosphatase)	PF01663.22(Phosphodiest:Type I phosphodiesterase / nucleotide pyrophosphatase); PF00884.23(Sulfatase:Sulfatase)	sp|Q2U9J2|GPI7_ASPOR(GPI ethanolamine phosphate transferase 2 OS=Aspergillus oryzae (strain ATCC 42149 / RIB 40) OX=510516 GN=las21 PE=3 SV=2)
85812	e_gw1.18.135.1	ATP-NAD kinase family protein	1323	2.28095	Up	7.97048e-65	COG0061(S:Function unknown)	COG0061(Glycosyl hydrolase catalytic core)	PF01513.21(NAD_kinase:ATP-NAD kinase)	sp|Q9UT98|POS5_SCHPO(NADH kinase pos5, mitochondrial OS=Schizosaccharomyces pombe (strain 972 / ATCC 24843) OX=284812 GN=pos5 PE=3 SV=2)
55837	gw1.28.237.1	hypothetical protein	2028	2.27981	Up	3.97834e-118	ENOG410XTFE(S:Function unknown)	ENOG410XTFE(LCCL domain protein)	PF03815.19(LCCL:LCCL domain)	sp|P40514|YIG7_YEAST(Uncharacterized protein YIL067C OS=Saccharomyces cerevisiae (strain ATCC 204508 / S288c) OX=559292 GN=YIL067C PE=1 SV=1)
96624	estExt_Genewise1Plus.C_3_t30331	hypothetical protein	980	2.27628	Up	3.66462e-213	ENOG4111JS3(S:Function unknown)	ENOG4111JS3(Conserved hypothetical, protein)	PF10558.9(MTP18:Mitochondrial 18 KDa protein (MTP18))	sp|Q8T3C8|MTFP1_CAEEL(Mitochondrial fission process protein 1 OS=Caenorhabditis elegans OX=6239 GN=mtp-18 PE=3 SV=2)
35100	fgenesh1_pg.7_#_268	putative antiviral protein	4263	2.27453	Up	3.54496e-23	ENOG410ZG1H(S:Function unknown)	ENOG410ZG1H(Tetratricopeptide repeat domain 37)	PF13432.6(TPR_16:Tetratricopeptide repeat); PF07719.17(TPR_2:Tetratricopeptide repeat); PF00515.28(TPR_1:Tetratricopeptide repeat); PF14559.6(TPR_19:Tetratricopeptide repeat); PF13181.6(TPR_8:Tetratricopeptide repeat); PF13428.6(TPR_14:Tetratricopeptide repeat); PF13424.6(TPR_12:Tetratricopeptide repeat); PF13176.6(TPR_7:Tetratricopeptide repeat); PF18833.1(TPR_22:Tetratricopeptide repeat); PF178…	sp|O94474|SKI3_SCHPO(Superkiller protein 3 OS=Schizosaccharomyces pombe (strain 972 / ATCC 24843) OX=284812 GN=ski3 PE=3 SV=1)
65065	gw1.8.806.1	MFS general substrate transporter	987	2.27163	Up	1.60037e-13	ENOG4111A50(U:Intracellular trafficking, secretion, and vesicular transport); COG0477(U:Intracellular trafficking, secretion, and vesicular transport); ENOG410ZNEV(S:Function unknown)	ENOG4111A50(solute carrier family 16, member); COG0477(solute carrier family 16, member); ENOG410ZNEV(Major Facilitator Superfamily)	PF07690.16(MFS_1:Major Facilitator Superfamily)	sp|Q5AUY2|DBAD_EMENI(MFS-type transporter dbaD OS=Emericella nidulans (strain FGSC A4 / ATCC 38163 / CBS 112.46 / NRRL 194 / M139) OX=227321 GN=dbaD PE=2 SV=1)
139032	estExt_fgenesh1_pm.C_270083	caffeine-induced death protein 2	737	2.27145	Up	1.07533e-147	ENOG4111HVE(S:Function unknown)	ENOG4111HVE(Caffeine-induced death protein)	PF09774.9(Cid2:Caffeine-induced death protein 2)	sp|O74982|CID2_SCHPO(Caffeine-induced death protein 2 OS=Schizosaccharomyces pombe (strain 972 / ATCC 24843) OX=284812 GN=cid2 PE=2 SV=1)
83763	e_gw1.14.325.1	DlpA domain-containing protein	690	2.26459	Up	2.12852e-16	COG0684(H:Coenzyme transport and metabolism)	COG0684(Globally modulates RNA abundance by binding to RNase E (Rne) and regulating its endonucleolytic activity. Can modulate Rne action in a substrate-dependent manner by altering the composition of the degradosome. Modulates RNA-binding and helicase activities of the degradosome (By similarity))	PF03737.15(RraA-like:Aldolase/RraA)	sp|P40011|RRAAH_YEAST(4-hydroxy-4-methyl-2-oxoglutarate aldolase OS=Saccharomyces cerevisiae (strain ATCC 204508 / S288c) OX=559292 GN=YER010C PE=1 SV=1)
5346	gm1.902_g	hypothetical protein	4788	2.26149	Up	8.04224e-11	ENOG410YDUM(S:Function unknown); COG0176(S:Function unknown)	ENOG410YDUM(-); COG0176(-)
71852	e_gw1.2.2025.1	hypothetical protein	1602	2.25802	Up	5.0816e-06	COG5600(S:Function unknown)	COG5600(SUN domain protein (Adg3))		sp|Q9Y820|YON7_SCHPO(PCI domain-containing protein C1105.07c OS=Schizosaccharomyces pombe (strain 972 / ATCC 24843) OX=284812 GN=SPBC1105.07c PE=4 SV=1)
112807	estExt_Genewise1.C_14_t10414	Metalloproteases ("zincins")	2183	2.25741	Up	4.08146e-116	COG0339(S:Function unknown)	COG0339(Conserved hypothetical, protein)	PF01432.20(Peptidase_M3:Peptidase family M3)	sp|P25375|PRTD_YEAST(Saccharolysin OS=Saccharomyces cerevisiae (strain ATCC 204508 / S288c) OX=559292 GN=PRD1 PE=1 SV=1)
39653	fgenesh1_pg.39_#_19	major facilitator superfamily transporter	1422	2.25634	Up	1.10008e-12	ENOG410XSQ8(G:Carbohydrate transport and metabolism)	ENOG410XSQ8(Pantothenate transporter)	PF07690.16(MFS_1:Major Facilitator Superfamily); PF06779.14(MFS_4:Uncharacterised MFS-type transporter YbfB)	sp|O43000|LIZ1_SCHPO(Pantothenate transporter liz1 OS=Schizosaccharomyces pombe (strain 972 / ATCC 24843) OX=284812 GN=liz1 PE=2 SV=2)
32389	fgenesh1_pg.1_#_878	hypothetical protein	579	2.25617	Up	1.18162e-06
89955	e_gw1.27.56.1	hypothetical protein	675	2.25545	Up	5.0816e-06	ENOG410YMZ5(S:Function unknown)	ENOG410YMZ5(-)	PF13460.6(NAD_binding_10:NAD(P)H-binding)
111102	estExt_Genewise1.C_9_t20225	Longevity assurance proteins LAG1/LAC1	1542	2.25504	Up	2.08178e-46	COG5058(U:Intracellular trafficking, secretion, and vesicular transport)	COG5058(ceramide synthase)	PF03798.16(TRAM_LAG1_CLN8:TLC domain); PF08390.11(TRAM1:TRAM1-like protein)	sp|W7LKY5|FUM17_GIBM7(Sphingosine N-acyltransferase-like protein FUM17 OS=Gibberella moniliformis (strain M3125 / FGSC 7600) OX=334819 GN=FUM17 PE=3 SV=1)
129240	fgenesh1_pm.6_#_374	DUF862-domain containing protein	1740	2.25283	Up	1.80536e-101	ENOG4111H3Z(S:Function unknown)	ENOG4111H3Z(Desumoylating isopeptidase)	PF08324.11(PUL:PUL domain); PF05903.14(Peptidase_C97:PPPDE putative peptidase domain); PF00085.20(Thioredoxin:Thioredoxin); PF13728.6(TraF:F plasmid transfer operon protein); PF00837.17(T4_deiodinase:Iodothyronine deiodinase); PF13098.6(Thioredoxin_2:Thioredoxin-like domain)	sp|Q6ICB0|DESI1_HUMAN(Desumoylating isopeptidase 1 OS=Homo sapiens OX=9606 GN=DESI1 PE=1 SV=1)
96873	estExt_Genewise1Plus.C_4_t20014	acetoacetate-CoA ligase	2312	2.24998	Up	5.0526e-73	COG0365(H:Coenzyme transport and metabolism)	COG0365(8-Amino-7-oxononanoate synthase)	PF00501.28(AMP-binding:AMP-binding enzyme); PF16177.5(ACAS_N:Acetyl-coenzyme A synthetase N-terminus); PF13193.6(AMP-binding_C:AMP-binding enzyme C-terminal domain)	sp|D7PHZ3|VRTB_PENAE(Malonamoyl-CoA synthetase vrtB OS=Penicillium aethiopicum OX=36650 GN=vrtB PE=1 SV=1)
126241	fgenesh1_pm.1_#_655	NAD(P)-binding protein	858	2.24705	Up	9.62262e-05	COG1028(S:Function unknown)	COG1028(-)	PF13561.6(adh_short_C2:Enoyl-(Acyl carrier protein) reductase); PF00106.25(adh_short:short chain dehydrogenase); PF08659.10(KR:KR domain)	sp|Q9X248|FABG_THEMA(3-oxoacyl-[acyl-carrier-protein] reductase FabG OS=Thermotoga maritima (strain ATCC 43589 / MSB8 / DSM 3109 / JCM 10099) OX=243274 GN=fabG PE=3 SV=1)
9634	gm1.5190_g	hypothetical protein	267	2.24204	Up	1.07238e-07	ENOG41129PY(S:Function unknown)	ENOG41129PY(Cytochrome C oxidase assembly protein)	PF15786.5(PET117:PET assembly of cytochrome c oxidase, mitochondrial)
94780	estExt_Genewise1Plus.C_1_t50244	Rhodanese-like protein	1184	2.24158	Up	9.91546e-234	COG2897(P:Inorganic ion transport and metabolism)	COG2897(sulfurtransferase)	PF00581.20(Rhodanese:Rhodanese-like domain)	sp|Q08686|THTR_YEAST(Thiosulfate sulfurtransferase TUM1 OS=Saccharomyces cerevisiae (strain ATCC 204508 / S288c) OX=559292 GN=TUM1 PE=1 SV=1)
46365	gw1.20.130.1	hypothetical protein	720	2.24126	Up	5.14628e-27	ENOG410YKR8(S:Function unknown)	ENOG410YKR8(Conserved hypothetical, protein)
6751	gm1.2307_g	putative cytochrome P450	1662	2.24002	Up	2.15218e-48	COG2124(G:Carbohydrate transport and metabolism)	COG2124(Oxalate decarboxylase)	PF00067.22(p450:Cytochrome P450)	sp|Q9UNU6|CP8B1_HUMAN(7-alpha-hydroxycholest-4-en-3-one 12-alpha-hydroxylase OS=Homo sapiens OX=9606 GN=CYP8B1 PE=1 SV=2)
34322	fgenesh1_pg.5_#_261	hypothetical protein	1347	2.23947	Up	9.62262e-05
130110	fgenesh1_pm.9_#_56	prolyl-tRNA synthetase	1791	2.23825	Up	1.01436e-32	COG0442(O:Posttranslational modification, protein turnover, chaperones)	COG0442(Molecular chaperone capable of stabilizing a range of proteins. Seems to fulfill an ATP-independent, HSP70-like function in archaeal de novo protein folding (By similarity))	PF00587.25(tRNA-synt_2b:tRNA synthetase class II core domain (G, H, P, S and T)); PF03129.20(HGTP_anticodon:Anticodon binding domain)	sp|O66690|SYP_AQUAE(Proline--tRNA ligase OS=Aquifex aeolicus (strain VF5) OX=224324 GN=proS PE=1 SV=1)
138500	estExt_fgenesh1_pm.C_190137	hypothetical protein	956	2.23635	Up	4.39274e-21	ENOG4111BVE(S:Function unknown); ENOG410YJ9V(S:Function unknown)	ENOG4111BVE(-); ENOG410YJ9V(-)
25145	estExt_Genemark1.C_100124	hypothetical protein	1893	2.23591	Up	2.95984e-40	ENOG4110W8R(S:Function unknown); ENOG410YFP9(S:Function unknown)	ENOG4110W8R(Fungal specific transcription factor domain); ENOG410YFP9(Fungal specific transcription factor domain)	PF04082.18(Fungal_trans:Fungal specific transcription factor domain)
82106	e_gw1.12.360.1	putative cytochrome P450	1647	2.23098	Up	3.37824e-50	COG2124(C:Energy production and conversion)	COG2124(malate synthase)	PF00067.22(p450:Cytochrome P450)	sp|B9WZX1|FTMC_ASPFM(Tryprostatin B 6-hydroxylase OS=Neosartorya fumigata OX=746128 GN=ftmP450-1 PE=1 SV=1)
125408	estExt_fgenesh2_kg.C_400015	putative prohibitin PHB1	1091	2.22886	Up	0	COG0330(O:Posttranslational modification, protein turnover, chaperones)	COG0330(Band 7 protein)	PF01145.25(Band_7:SPFH domain / Band 7 family); PF12127.8(YdfA_immunity:SigmaW regulon antibacterial)	sp|P40961|PHB1_YEAST(Prohibitin-1 OS=Saccharomyces cerevisiae (strain ATCC 204508 / S288c) OX=559292 GN=PHB1 PE=1 SV=2)
68665	e_gw1.1.478.1	hypothetical protein	1026	2.22525	Up	1.95344e-06	COG3217(S:Function unknown)	COG3217(MOSC domain-containing protein)	PF03473.17(MOSC:MOSC domain); PF03476.16(MOSC_N:MOSC N-terminal beta barrel domain)	sp|Q9CW42|MARC1_MOUSE(Mitochondrial amidoxime-reducing component 1 OS=Mus musculus OX=10090 GN=Marc1 PE=1 SV=2)
72047	e_gw1.2.1220.1	hypothetical protein	687	2.22388	Up	9.603e-25	ENOG411210U(S:Function unknown)	ENOG411210U(integral membrane protein)	PF10615.9(DUF2470:Protein of unknown function (DUF2470))
139736	estExt_fgenesh1_pg.C_1_t10322	expressed protein	1833	2.22178	Up	4.31346e-45	ENOG41125G8(S:Function unknown)	ENOG41125G8(Conserved hypothetical, protein)
143047	estExt_fgenesh1_pg.C_300039	S-adenosyl-L-methionine-dependent methyltransferase	830	2.22086	Up	1.03119e-46	COG4106(S:Function unknown)	COG4106(Catalyzes the S-adenosylmethionine monomethyl esterification of trans-aconitate (By similarity))	PF13649.6(Methyltransf_25:Methyltransferase domain); PF13847.6(Methyltransf_31:Methyltransferase domain); PF08241.12(Methyltransf_11:Methyltransferase domain); PF13489.6(Methyltransf_23:Methyltransferase domain); PF08242.12(Methyltransf_12:Methyltransferase domain); PF05175.14(MTS:Methyltransferase small domain); PF01739.18(CheR:CheR methyltransferase, SAM binding domain); PF02390.17(Methyltransf…	sp|Q1QJC0|TAM_NITHX(Trans-aconitate 2-methyltransferase OS=Nitrobacter hamburgensis (strain DSM 10229 / NCIMB 13809 / X14) OX=323097 GN=tam PE=3 SV=1)
99967	estExt_Genewise1Plus.C_11_t10085	expressed protein	1264	2.21828	Up	3.73804e-16	ENOG4111ZAN(S:Function unknown)	ENOG4111ZAN(Conserved hypothetical, protein)	PF07766.13(LETM1:LETM1-like protein)
84924	e_gw1.16.326.1	DUF339-domain containing protein	633	2.21661	Up	4.20934e-34	COG2938(S:Function unknown)	COG2938(the catalytic subunit of succinate dehydrogenase (SDH). SDH is involved in complex II of the mitochondrial electron transport chain and is responsible for transferring electrons from succinate to ubiquinone (coenzyme Q). In is unclear whether it participates in the chemistry of FAD attachment (enzymatic function) or acts as a chaperone that maintains)	PF03937.16(Sdh5:Flavinator of succinate dehydrogenase)	sp|B6HRA4|SDHF2_PENRW(Succinate dehydrogenase assembly factor 2, mitochondrial OS=Penicillium rubens (strain ATCC 28089 / DSM 1075 / NRRL 1951 / Wisconsin 54-1255) OX=500485 GN=Pc22g03150 PE=3 SV=1)
134848	fgenesh1_pm.41_#_2	hypothetical protein	1899	2.2134	Up	1.76616e-07	ENOG410YCDV(S:Function unknown)	ENOG410YCDV(Fungal specific transcription factor domain)	PF00172.18(Zn_clus:Fungal Zn(2)-Cys(6) binuclear cluster domain); PF04082.18(Fungal_trans:Fungal specific transcription factor domain)	sp|I1RF57|AURR2_GIBZE(Aurofusarin cluster transcription factor aurR2 OS=Gibberella zeae (strain PH-1 / ATCC MYA-4620 / FGSC 9075 / NRRL 31084) OX=229533 GN=aurR2 PE=2 SV=1)
91912	e_gw1.35.32.1	hypothetical protein	1836	2.21299	Up	0.000425954	COG1346(M:Cell wall/membrane/envelope biogenesis)	COG1346(cytolysis)	PF04172.16(LrgB:LrgB-like family)
74551	e_gw1.4.560.1	hypothetical protein	1269	2.21169	Up	1.95344e-06	ENOG4110XNV(S:Function unknown); ENOG411159A(S:Function unknown)	ENOG4110XNV(-); ENOG411159A(Putative amidoligase enzyme)
141501	estExt_fgenesh1_pg.C_100004	putative zinc-binding alcohol dehydrogenase	1231	2.21056	Up	3.7682e-51	COG1064(S:Function unknown)	COG1064(UPF0187 protein)	PF00107.26(ADH_zinc_N:Zinc-binding dehydrogenase); PF08240.12(ADH_N:Alcohol dehydrogenase GroES-like domain); PF13602.6(ADH_zinc_N_2:Zinc-binding dehydrogenase)	sp|P25377|ADH7_YEAST(NADP-dependent alcohol dehydrogenase 7 OS=Saccharomyces cerevisiae (strain ATCC 204508 / S288c) OX=559292 GN=ADH7 PE=1 SV=1)
48843	gw1.1.1037.1	hypothetical protein	1236	2.21013	Up	4.67734e-21	ENOG41121U5(S:Function unknown)	ENOG41121U5(ZnF_C2H2)
24424	estExt_Genemark1.C_50319	hypothetical protein	1416	2.20601	Up	1.46995e-26	COG2036(B:Chromatin structure and dynamics)	COG2036(Core component of nucleosome. Nucleosomes wrap and compact DNA into chromatin, limiting DNA accessibility to the cellular machineries which require DNA as a template. Histones thereby play a central role in transcription regulation, DNA repair, DNA replication and chromosomal stability. DNA accessibility is regulated via a complex set of post-translational modifications of histones, also …	PF15511.6(CENP-T_C:Centromere kinetochore component CENP-T histone fold); PF00125.24(Histone:Core histone H2A/H2B/H3/H4); PF15630.6(CENP-S:CENP-S protein); PF07524.13(Bromo_TP:Bromodomain associated)	sp|Q9HGK9|CENPT_SCHPO(Inner kinetochore subunit cnp20 OS=Schizosaccharomyces pombe (strain 972 / ATCC 24843) OX=284812 GN=cnp20 PE=3 SV=1)
76529	e_gw1.6.1058.1	hypothetical protein	1596	2.20511	Up	4.88084e-12	ENOG410YMTQ(S:Function unknown)	ENOG410YMTQ(-)	PF11951.8(Fungal_trans_2:Fungal specific transcription factor domain)	sp|Q5B288|Y5342_EMENI(Uncharacterized protein AN5342 OS=Emericella nidulans (strain FGSC A4 / ATCC 38163 / CBS 112.46 / NRRL 194 / M139) OX=227321 GN=AN5342 PE=1 SV=1)
83936	e_gw1.15.113.1	NAD(P)-binding protein	1068	2.20267	Up	4.60624e-13	COG0111(S:Function unknown)	COG0111(-)	PF02826.19(2-Hacid_dh_C:D-isomer specific 2-hydroxyacid dehydrogenase, NAD binding domain)	sp|P0C1E9|YPRB2_CORML(Uncharacterized protein in proB 3'region OS=Corynebacterium melassecola OX=41643 PE=3 SV=1)
23425	estExt_Genemark1.C_1_t20246	fungal-specific transcription factor domain-containing protein	2061	2.20066	Up	6.59276e-81	ENOG41104BW(S:Function unknown)	ENOG41104BW(C6 transcription factor)	PF04082.18(Fungal_trans:Fungal specific transcription factor domain); PF00172.18(Zn_clus:Fungal Zn(2)-Cys(6) binuclear cluster domain)	sp|Q9P6I9|YHDD_SCHPO(Uncharacterized transcriptional regulatory protein C1683.13c OS=Schizosaccharomyces pombe (strain 972 / ATCC 24843) OX=284812 GN=SPBC1683.13c PE=1 SV=1)
38203	fgenesh1_pg.22_#_38	hypothetical protein	801	2.20064	Up	1.05133e-14	ENOG4111QCS(S:Function unknown)	ENOG4111QCS(Mannosylphosphorylation protein)	PF04991.13(LicD:LicD family)	sp|P36044|MNN4_YEAST(Protein MNN4 OS=Saccharomyces cerevisiae (strain ATCC 204508 / S288c) OX=559292 GN=MNN4 PE=4 SV=2)
77115	e_gw1.6.363.1	Class I glutamine amidotransferase-like protein	690	2.20017	Up	9.85792e-26	COG0693(S:Function unknown)	COG0693(PfpI family)	PF01965.24(DJ-1_PfpI:DJ-1/PfpI family); PF17124.5(ThiJ_like:ThiJ/PfpI family-like)	sp|Q5AF03|HSP31_CANAL(Glyoxalase 3 OS=Candida albicans (strain SC5314 / ATCC MYA-2876) OX=237561 GN=GLX3 PE=1 SV=1)
96652	estExt_Genewise1Plus.C_3_t30406	acyl-CoA dehydrogenase mitochondrial precursor	1497	2.19909	Up	1.05716e-98	COG1960(I:Lipid transport and metabolism)	COG1960(acyl-CoA dehydrogenase)	PF00441.24(Acyl-CoA_dh_1:Acyl-CoA dehydrogenase, C-terminal domain); PF02771.16(Acyl-CoA_dh_N:Acyl-CoA dehydrogenase, N-terminal domain); PF02770.19(Acyl-CoA_dh_M:Acyl-CoA dehydrogenase, middle domain); PF08028.11(Acyl-CoA_dh_2:Acyl-CoA dehydrogenase, C-terminal domain); PF11794.8(HpaB_N:4-hydroxyphenylacetate 3-hydroxylase N terminal)	sp|P45954|ACDSB_HUMAN(Short/branched chain specific acyl-CoA dehydrogenase, mitochondrial OS=Homo sapiens OX=9606 GN=ACADSB PE=1 SV=1)
85100	e_gw1.16.478.1	hypothetical protein	342	2.19853	Up	1.81195e-13	ENOG410Y4P0(S:Function unknown)	ENOG410Y4P0(-)
82203	e_gw1.12.422.1	Indoleamine 2%2C3-dioxygenase	1497	2.19686	Up	5.85854e-40	ENOG410XQHE(U:Intracellular trafficking, secretion, and vesicular transport)	ENOG410XQHE(Tumor susceptibility gene 101)	PF01231.18(IDO:Indoleamine 2,3-dioxygenase)	sp|P47125|I23O_YEAST(Indoleamine 2,3-dioxygenase OS=Saccharomyces cerevisiae (strain ATCC 204508 / S288c) OX=559292 GN=BNA2 PE=1 SV=1)
88368	e_gw1.23.77.1	hypothetical protein	198	2.19456	Up	6.28896e-09	ENOG41116F1(S:Function unknown)	ENOG41116F1(-)
133213	fgenesh1_pm.22_#_133	putative porphobilinogen deaminase Hem3	1002	2.19252	Up	7.69754e-79	COG0181(S:Function unknown)	COG0181(Cupin 2 Conserved Barrel Domain Protein)	PF01379.20(Porphobil_deam:Porphobilinogen deaminase, dipyromethane cofactor binding domain); PF03900.15(Porphobil_deamC:Porphobilinogen deaminase, C-terminal domain)	sp|Q6C097|HEM3_YARLI(Porphobilinogen deaminase OS=Yarrowia lipolytica (strain CLIB 122 / E 150) OX=284591 GN=HEM3 PE=3 SV=1)
76418	e_gw1.6.107.1	hypothetical protein	1965	2.18955	Up	6.83814e-08	ENOG410YMF9(S:Function unknown); ENOG41129HV(S:Function unknown)	ENOG410YMF9(GAL4); ENOG41129HV(Pfam:DUF3468)	PF00172.18(Zn_clus:Fungal Zn(2)-Cys(6) binuclear cluster domain); PF11951.8(Fungal_trans_2:Fungal specific transcription factor domain)	sp|Q9UT46|MOC3_SCHPO(Transcriptional regulatory protein moc3 OS=Schizosaccharomyces pombe (strain 972 / ATCC 24843) OX=284812 GN=moc3 PE=1 SV=4)
35772	fgenesh1_pg.10_#_1	TfdA family taurine catabolism dioxygenase TauD	1173	2.18688	Up	3.21802e-06	COG2175(S:Function unknown)	COG2175(Heterokaryon incompatibility protein (HET))	PF02668.16(TauD:Taurine catabolism dioxygenase TauD, TfdA family)	sp|Q7SEI7|XANA_NEUCR(Alpha-ketoglutarate-dependent xanthine dioxygenase xan-1 OS=Neurospora crassa (strain ATCC 24698 / 74-OR23-1A / CBS 708.71 / DSM 1257 / FGSC 987) OX=367110 GN=xan-1 PE=1 SV=1)
140464	estExt_fgenesh1_pg.C_3_t10244	major facilitator superfamily protein	2013	2.18338	Up	6.28896e-09	ENOG410XSTK(U:Intracellular trafficking, secretion, and vesicular transport)	ENOG410XSTK(Feline leukemia virus subgroup C cellular receptor)	PF07690.16(MFS_1:Major Facilitator Superfamily)	sp|Q4H425|EF102_EPIFF(MFS-type transporter EF102 OS=Epichloe festucae (strain Fl1) OX=877507 GN=EF102 PE=2 SV=1)
88239	e_gw1.23.8.1	kinesin motor domain-containing protein	1359	2.18269	Up	1.55732e-16	COG5059(S:Function unknown)	COG5059(Dienelactone hydrolase family)	PF00225.23(Kinesin:Kinesin motor domain); PF16796.5(Microtub_bd:Microtubule binding)	sp|B9EY52|KN13B_ORYSJ(Kinesin-like protein KIN-13B OS=Oryza sativa subsp. japonica OX=39947 GN=KIN13B PE=2 SV=2)
84143	e_gw1.15.508.1	putative C6 transcription factor	2115	2.18166	Up	1.71801e-14	ENOG410YCPH(S:Function unknown)	ENOG410YCPH(-)	PF00172.18(Zn_clus:Fungal Zn(2)-Cys(6) binuclear cluster domain)	sp|Q59UY7|SEF1_CANAL(Transcriptional regulatory protein SEF1 OS=Candida albicans (strain SC5314 / ATCC MYA-2876) OX=237561 GN=SEF1 PE=1 SV=1)
77939	e_gw1.7.392.1	solute carrier family 25 member 45	894	2.17974	Up	4.4201e-24	ENOG410Z9ZS(S:Function unknown)	ENOG410Z9ZS(carrier protein)	PF00153.27(Mito_carr:Mitochondrial carrier protein)	sp|Q9CA93|BAC2_ARATH(Mitochondrial arginine transporter BAC2 OS=Arabidopsis thaliana OX=3702 GN=BAC2 PE=1 SV=1)
93416	e_gw1.52.38.1	thermosensitive gluconokinase	3684	2.17544	Up	3.21802e-06	COG3265(G:Carbohydrate transport and metabolism); COG3320(Q:Secondary metabolites biosynthesis, transport and catabolism)	COG3265(carbohydrate kinase, thermoresistant glucokinase family); COG3320(domain protein)	PF07993.12(NAD_binding_4:Male sterility protein); PF00501.28(AMP-binding:AMP-binding enzyme); PF01370.21(Epimerase:NAD dependent epimerase/dehydratase family); PF13671.6(AAA_33:AAA domain); PF01202.22(SKI:Shikimate kinase); PF00550.25(PP-binding:Phosphopantetheine attachment site); PF13238.6(AAA_18:AAA domain); PF01073.19(3Beta_HSD:3-beta hydroxysteroid dehydrogenase/isomerase family); PF02224.18…	sp|A0A0D2YG01|FUB8_FUSO4(Non-canonical non-ribosomal peptide synthetase FUB8 OS=Fusarium oxysporum f. sp. lycopersici (strain 4287 / CBS 123668 / FGSC 9935 / NRRL 34936) OX=426428 GN=FUB8 PE=1 SV=1)
128754	fgenesh1_pm.5_#_292	Protein kinase-like protein	2358	2.17253	Up	4.23708e-221	ENOG410XQ0D(S:Function unknown)	ENOG410XQ0D(Domain of unknown function (DUF1772))	PF00069.25(Pkinase:Protein kinase domain); PF07714.17(Pkinase_Tyr:Protein tyrosine kinase)	sp|P25333|HAL4_YEAST(Serine/threonine-protein kinase HAL4/SAT4 OS=Saccharomyces cerevisiae (strain ATCC 204508 / S288c) OX=559292 GN=SAT4 PE=1 SV=1)
33980	fgenesh1_pg.4_#_327	hypothetical protein	3726	2.17172	Up	1.55732e-16	ENOG410YBMG(S:Function unknown)	ENOG410YBMG(-)
79137	e_gw1.8.486.1	phytase	1374	2.17039	Up	3.06676e-22	ENOG4111FS8(S:Function unknown)	ENOG4111FS8(PHOsphatase)	PF00328.22(His_Phos_2:Histidine phosphatase superfamily (branch 2))	sp|O00092|PHYA_ASPFU(3-phytase A OS=Neosartorya fumigata (strain ATCC MYA-4609 / Af293 / CBS 101355 / FGSC A1100) OX=330879 GN=phyA PE=1 SV=1)
25418	estExt_Genemark1.C_120122	putative isopenicillin N synthetase	1293	2.16993	Up	7.40492e-70	COG3491(S:Function unknown)	COG3491(Conserved hypothetical, protein)	PF14226.6(DIOX_N:non-haem dioxygenase in morphine synthesis N-terminal); PF03171.20(2OG-FeII_Oxy:2OG-Fe(II) oxygenase superfamily)	sp|Q84MB6|DIOX2_ARATH(Probable 2-oxoglutarate-dependent dioxygenase At3g50210 OS=Arabidopsis thaliana OX=3702 GN=At3g50210 PE=2 SV=1)
130666	fgenesh1_pm.10_#_292	ketoisovalerate reductase	1353	2.16855	Up	2.6501e-08	COG1893(J:Translation, ribosomal structure and biogenesis)	COG1893(Located on the platform of the 30S subunit, it bridges several disparate RNA helices of the 16S rRNA. Forms part of the Shine-Dalgarno cleft in the 70S ribosome (By similarity))	PF08546.11(ApbA_C:Ketopantoate reductase PanE/ApbA C terminal); PF02558.16(ApbA:Ketopantoate reductase PanE/ApbA)	sp|S0EGG0|BEA2_GIBF5(Ketoisovalerate reductase BEA2 OS=Gibberella fujikuroi (strain CBS 195.34 / IMI 58289 / NRRL A-6831) OX=1279085 GN=BEA2 PE=2 SV=1)
9240	gm1.4796_g	putative cytochrome b5	258	2.16802	Up	1.97258e-22	COG5274(S:Function unknown)	COG5274(Protein of unknown function (DUF2462))	PF00173.28(Cyt-b5:Cytochrome b5-like Heme/Steroid binding domain)	sp|Q8X0J4|CYB5L_NEUCR(Putative cytochrome b5 B11H24.095 OS=Neurospora crassa (strain ATCC 24698 / 74-OR23-1A / CBS 708.71 / DSM 1257 / FGSC 987) OX=367110 GN=B11H24.095 PE=3 SV=1)
82581	e_gw1.12.115.1	hypothetical protein	1719	2.16784	Up	5.62472e-19	ENOG411165F(S:Function unknown); ENOG410YGWN(S:Function unknown)	ENOG411165F(Fungal Zn(2)-Cys(6) binuclear cluster domain); ENOG410YGWN(-)	PF00172.18(Zn_clus:Fungal Zn(2)-Cys(6) binuclear cluster domain)
102008	estExt_Genewise1Plus.C_17_t20012	oxidoreductase	1281	2.16431	Up	2.4228e-17	ENOG4111F5D(S:Function unknown)	ENOG4111F5D(oxidoreductase, zinc-binding dehydrogenase family)	PF00107.26(ADH_zinc_N:Zinc-binding dehydrogenase)	sp|A0A0E4FKF7|FSA3_FUSSF(Trans-enoyl reductase fsa3 OS=Fusarium sp. (strain FN080326) OX=1608308 GN=fsa3 PE=3 SV=1)
69643	e_gw1.1.1587.1	hypothetical protein	1449	2.16281	Up	5.88468e-30	ENOG410YG24(S:Function unknown)	ENOG410YG24(-)
77555	e_gw1.7.378.1	hypothetical protein	1317	2.1623	Up	2.42868e-61	ENOG410YIT3(S:Function unknown)	ENOG410YIT3(Conserved hypothetical, protein)	PF12937.7(F-box-like:F-box-like); PF00646.33(F-box:F-box domain)
120015	fgenesh2_kg.17_#_9_#_gi|38139114|gb|CF884432.1|CF884432	expressed protein	402	2.15983	Up	6.00436e-05
89548	e_gw1.26.165.1	hypothetical protein	816	2.15835	Up	4.12912e-16	ENOG411144H(S:Function unknown); ENOG410Z84Q(S:Function unknown)	ENOG411144H(ZnF_C2H2); ENOG410Z84Q(C2H2 finger domain protein)
37809	fgenesh1_pg.19_#_134	NAD(P)-binding protein	924	2.15528	Up	5.28184e-06	ENOG410YGXV(S:Function unknown); ENOG410YCCV(S:Function unknown)	ENOG410YGXV(NmrA-like family); ENOG410YCCV(NmrA-like family)	PF05368.13(NmrA:NmrA-like family); PF13460.6(NAD_binding_10:NAD(P)H-binding); PF01370.21(Epimerase:NAD dependent epimerase/dehydratase family); PF08659.10(KR:KR domain)	sp|E9F8M1|SWNN_METRA(Oxidoreductase swnN OS=Metarhizium robertsii (strain ARSEF 23 / ATCC MYA-3075) OX=655844 GN=swnN PE=3 SV=1)
133064	fgenesh1_pm.21_#_140	putative pentafunctional AROM polypeptide	2283	2.15169	Up	7.987e-36	COG0710(E:Amino acid transport and metabolism)	COG0710(Type I DHQase)	PF01487.15(DHquinase_I:Type I 3-dehydroquinase)	sp|B6QCA7|ARO12_TALMQ(Pentafunctional AROM polypeptide 2 OS=Talaromyces marneffei (strain ATCC 18224 / CBS 334.59 / QM 7333) OX=441960 GN=aroM-2 PE=3 SV=1)
95607	estExt_Genewise1Plus.C_2_t30110	acetyl-CoA acetyltransferase	1306	2.15091	Up	2.99894e-38	COG0183(S:Function unknown)	COG0183(SUN domain protein (Adg3))	PF00108.23(Thiolase_N:Thiolase, N-terminal domain); PF02803.18(Thiolase_C:Thiolase, C-terminal domain); PF00109.26(ketoacyl-synt:Beta-ketoacyl synthase, N-terminal domain)	sp|Q6L8K7|THIL_YARLI(Acetyl-CoA acetyltransferase OS=Yarrowia lipolytica (strain CLIB 122 / E 150) OX=284591 GN=PAT1 PE=3 SV=1)
8792	gm1.4348_g	hypothetical protein	708	2.14667	Up	4.48068e-41	ENOG4111RE5(S:Function unknown); ENOG4110WTS(S:Function unknown)	ENOG4111RE5(Conserved hypothetical, protein); ENOG4110WTS(-)
129764	fgenesh1_pm.8_#_7	mitochondrial pyruvate dehydrogenase kinase	1338	2.14339	Up	9.9594e-30	COG0642(T:Signal transduction mechanisms)	COG0642(Histidine kinase)	PF10436.9(BCDHK_Adom3:Mitochondrial branched-chain alpha-ketoacid dehydrogenase kinase); PF02518.26(HATPase_c:Histidine kinase-, DNA gyrase B-, and HSP90-like ATPase)	sp|Q2KJG8|BCKD_BOVIN([3-methyl-2-oxobutanoate dehydrogenase [lipoamide]] kinase, mitochondrial OS=Bos taurus OX=9913 GN=BCKDK PE=2 SV=1)
81732	e_gw1.11.114.1	putative RNA methyltransferase	1656	2.14136	Up	3.26064e-12	COG0566(J:Translation, ribosomal structure and biogenesis)	COG0566(Methyltransferase)	PF00588.19(SpoU_methylase:SpoU rRNA Methylase family); PF08032.12(SpoU_sub_bind:RNA 2'-O ribose methyltransferase substrate binding)	sp|Q6IN84|MRM1_HUMAN(rRNA methyltransferase 1, mitochondrial OS=Homo sapiens OX=9606 GN=MRM1 PE=1 SV=1)
141574	estExt_fgenesh1_pg.C_100163	hypothetical protein	1945	2.14037	Up	6.21806e-47	ENOG410YMZ6(S:Function unknown)	ENOG410YMZ6(domain) containing protein)	PF02214.22(BTB_2:BTB/POZ domain)	sp|Q03900|YD132_YEAST(Uncharacterized protein YDR132C OS=Saccharomyces cerevisiae (strain ATCC 204508 / S288c) OX=559292 GN=YDR132C PE=1 SV=1)
102809	estExt_Genewise1Plus.C_210154	hypothetical protein	1350	2.13993	Up	2.13228e-21	COG2935(O:Posttranslational modification, protein turnover, chaperones)	COG2935(May conjugate Arg from its aminoacyl-tRNA to the N- termini of proteins containing an N-terminal aspartate or glutamate)	PF04377.15(ATE_C:Arginine-tRNA-protein transferase, C terminus); PF04376.13(ATE_N:Arginine-tRNA-protein transferase, N terminus)	sp|O14133|ATE1_SCHPO(Arginyl-tRNA--protein transferase 1 OS=Schizosaccharomyces pombe (strain 972 / ATCC 24843) OX=284812 GN=SPAC3C7.07c PE=3 SV=3)
7928	gm1.3484_g	Rad4-domain containing protein	2499	2.13993	Up	3.70892e-10	COG5535(L:Replication, recombination and repair)	COG5535(nucleotide-excision repair)	PF03835.15(Rad4:Rad4 transglutaminase-like domain); PF10405.9(BHD_3:Rad4 beta-hairpin domain 3); PF10403.9(BHD_1:Rad4 beta-hairpin domain 1); PF10404.9(BHD_2:Rad4 beta-hairpin domain 2)	sp|Q10445|RHP41_SCHPO(DNA repair protein rhp41 OS=Schizosaccharomyces pombe (strain 972 / ATCC 24843) OX=284812 GN=rhp41 PE=3 SV=1)
137932	estExt_fgenesh1_pm.C_140001	DUF159-domain containing protein	1015	2.13292	Up	2.69558e-28	COG2135(S:Function unknown)	COG2135(conserved protein)	PF02586.14(SRAP:SOS response associated peptidase (SRAP))	sp|Q04471|YM04_YEAST(Abasic site processing protein YMR114C OS=Saccharomyces cerevisiae (strain ATCC 204508 / S288c) OX=559292 GN=YMR114C PE=1 SV=1)
73038	e_gw1.3.399.1	hypothetical protein	2076	2.12911	Up	1.57641e-145	COG1506(S:Function unknown)	COG1506(chromatin modification)	PF00326.21(Peptidase_S9:Prolyl oligopeptidase family); PF05448.12(AXE1:Acetyl xylan esterase (AXE1))	sp|A7UKV4|DPP5_TRIEQ(Dipeptidyl-peptidase 5 OS=Trichophyton equinum OX=63418 GN=DPP5 PE=3 SV=1)
112021	estExt_Genewise1.C_12_t10133	Aldehyde dehydrogenase	1905	2.12879	Up	6.79946e-89	COG1012(S:Function unknown)	COG1012(-)	PF00171.22(Aldedh:Aldehyde dehydrogenase family)	sp|O69763|VDH_PSEFL(Vanillin dehydrogenase OS=Pseudomonas fluorescens OX=294 GN=vdh PE=3 SV=1)
99049	estExt_Genewise1Plus.C_8_t20166	hypothetical protein	4740	2.12724	Up	4.85958e-161	COG5113(O:Posttranslational modification, protein turnover, chaperones)	COG5113(Ubiquitin conjugation factor E4)	PF10408.9(Ufd2P_core:Ubiquitin elongating factor core); PF04564.15(U-box:U-box domain); PF13445.6(zf-RING_UBOX:RING-type zinc-finger); PF13923.6(zf-C3HC4_2:Zinc finger, C3HC4 type (RING finger)); PF02176.18(zf-TRAF:TRAF-type zinc finger); PF00097.25(zf-C3HC4:Zinc finger, C3HC4 type (RING finger)); PF13920.6(zf-C3HC4_3:Zinc finger, C3HC4 type (RING finger)); PF15227.6(zf-C3HC4_4:zinc finger of C3H…	sp|Q9HE05|UFD2_SCHPO(Ubiquitin conjugation factor E4 OS=Schizosaccharomyces pombe (strain 972 / ATCC 24843) OX=284812 GN=ufd2 PE=2 SV=1)
34974	fgenesh1_pg.7_#_142	hypothetical protein	1821	2.12702	Up	1.00165e-30	ENOG410YVRY(S:Function unknown)	ENOG410YVRY(-)
9463	gm1.5019_g	tyrosyl-tRNA synthetase	1884	2.12627	Up	4.48266e-168	COG0162(S:Function unknown)	COG0162(nitrogen permease regulator-like 2 (S. cerevisiae))	PF00579.25(tRNA-synt_1b:tRNA synthetases class I (W and Y)); PF16714.5(TyrRSs_C:Tyrosyl-tRNA synthetase C-terminal domain)	sp|P28669|SYYM_PODAS(Tyrosine--tRNA ligase, mitochondrial OS=Podospora anserina OX=5145 GN=YTS1 PE=3 SV=1)
36346	fgenesh1_pg.12_#_62	hypothetical protein	1086	2.12451	Up	7.05412e-08	ENOG410Y2GE(S:Function unknown)	ENOG410Y2GE(Glutathione-dependent formaldehyde-activating enzyme)	PF04828.14(GFA:Glutathione-dependent formaldehyde-activating enzyme)
80000	e_gw1.9.180.1	putative vanillate O-demethylase oxidoreductase	1653	2.12014	Up	7.05412e-08	COG2258(S:Function unknown)	COG2258(mosc domain containing protein)	PF03473.17(MOSC:MOSC domain); PF00111.27(Fer2:2Fe-2S iron-sulfur cluster binding domain); PF03475.14(3-alpha:3-alpha domain); PF00175.21(NAD_binding_1:Oxidoreductase NAD-binding domain)	sp|P76254|CNTB_ECOLI(Carnitine monooxygenase reductase subunit OS=Escherichia coli (strain K12) OX=83333 GN=yeaX PE=1 SV=1)
84279	e_gw1.15.217.1	hypothetical protein	5910	2.11987	Up	7.28118e-27	ENOG410YY5E(S:Function unknown)	ENOG410YY5E(Conserved hypothetical, protein)	PF09462.10(Mus7:Mus7/MMS22 family)	sp|O14207|MMS22_SCHPO(Protein mms22 OS=Schizosaccharomyces pombe (strain 972 / ATCC 24843) OX=284812 GN=mus7 PE=3 SV=1)
132231	fgenesh1_pm.17_#_99	hypothetical protein	2001	2.11917	Up	1.68261e-16	ENOG410YEW8(S:Function unknown); ENOG4110WQT(S:Function unknown)	ENOG410YEW8(Fungal Zn(2)-Cys(6) binuclear cluster domain); ENOG4110WQT(Fungal_trans)	PF00172.18(Zn_clus:Fungal Zn(2)-Cys(6) binuclear cluster domain); PF04082.18(Fungal_trans:Fungal specific transcription factor domain)
72202	e_gw1.2.1813.1	hypothetical protein	2964	2.11864	Up	6.06116e-19	ENOG410XR2X(S:Function unknown)	ENOG410XR2X(TEL2, telomere maintenance 2, homolog (S. cerevisiae))	PF10193.9(Telomere_reg-2:Telomere length regulation protein)	sp|Q9P3W5|TEL2_SCHPO(DNA replication checkpoint protein tel2 OS=Schizosaccharomyces pombe (strain 972 / ATCC 24843) OX=284812 GN=tel2 PE=1 SV=1)
34689	fgenesh1_pg.6_#_264	2OG-Fe(II) oxygenase superfamily protein	1038	2.11681	Up	9.84826e-05	COG3491(S:Function unknown)	COG3491(DNA ligase)	PF14226.6(DIOX_N:non-haem dioxygenase in morphine synthesis N-terminal); PF03171.20(2OG-FeII_Oxy:2OG-Fe(II) oxygenase superfamily)	sp|Q7LL04|YQK1_SCHPO(UPF0676 protein C1494.01 OS=Schizosaccharomyces pombe (strain 972 / ATCC 24843) OX=284812 GN=SPCC1494.01 PE=3 SV=2)
100940	estExt_Genewise1Plus.C_13_t20106	FAD dependent oxidoreductase	1401	2.11214	Up	3.18818e-24	COG0665(K:Transcription)	COG0665(General factor that plays a role in the activation of archaeal genes transcribed by RNA polymerase. Binds specifically to the TATA box promoter element which lies close to the position of transcription initiation (By similarity))	PF01266.24(DAO:FAD dependent oxidoreductase); PF13450.6(NAD_binding_8:NAD(P)-binding Rossmann-like domain)	sp|O43029|FAP1_SCHPO(L-pipecolate oxidase OS=Schizosaccharomyces pombe (strain 972 / ATCC 24843) OX=284812 GN=fap1 PE=1 SV=1)
141644	estExt_fgenesh1_pg.C_110040	hypothetical protein	4230	2.11063	Up	2.96266e-66	COG0146(S:Function unknown); COG0145(S:Function unknown)	COG0146(Membrane-associating domain); COG0145(Membrane-associating domain)	PF02538.14(Hydantoinase_B:Hydantoinase B/oxoprolinase); PF01968.18(Hydantoinase_A:Hydantoinase/oxoprolinase); PF05378.13(Hydant_A_N:Hydantoinase/oxoprolinase N-terminal region)	sp|Q10094|YAOF_SCHPO(Uncharacterized protein C11D3.15 OS=Schizosaccharomyces pombe (strain 972 / ATCC 24843) OX=284812 GN=SPAC11D3.15 PE=3 SV=1)
133728	fgenesh1_pm.26_#_74	alpha-L-fucosidase	2388	2.10912	Up	9.84826e-05	ENOG410XPGV(S:Function unknown)	ENOG410XPGV(Fungal_trans)	PF14498.6(Glyco_hyd_65N_2:Glycosyl hydrolase family 65, N-terminal domain)	sp|Q8L7W8|FUCO2_ARATH(Alpha-L-fucosidase 2 OS=Arabidopsis thaliana OX=3702 GN=FUC95A PE=1 SV=1)
73187	e_gw1.3.965.1	hypothetical protein	1533	2.10604	Up	1.05444e-08	COG0657(S:Function unknown)	COG0657(peroxisomal biogenesis factor 14)	PF07859.13(Abhydrolase_3:alpha/beta hydrolase fold); PF10340.9(Say1_Mug180:Steryl acetyl hydrolase)	sp|Q01109|BAH_STRHY(Acetyl-hydrolase OS=Streptomyces hygroscopicus OX=1912 GN=bah PE=3 SV=3)
67836	e_gw1.1.3022.1	hypothetical protein	1605	2.10324	Up	3.7501e-35	ENOG4111K6T(S:Function unknown)	ENOG4111K6T(capsule-associated protein CAP1)	PF05686.12(Glyco_transf_90:Glycosyl transferase family 90)	sp|Q5K8R6|CXT1_CRYNJ(Beta-1,2-xylosyltransferase 1 OS=Cryptococcus neoformans var. neoformans serotype D (strain JEC21 / ATCC MYA-565) OX=214684 GN=CXT1 PE=1 SV=1)
10410	gm1.5966_g	Tricorn protease domain 2-containing protein	1827	2.10186	Up	9.9618e-78	ENOG410XQN1(S:Function unknown)	ENOG410XQN1(actin filament depolymerization)	PF00400.32(WD40:WD domain, G-beta repeat); PF12894.7(ANAPC4_WD40:Anaphase-promoting complex subunit 4 WD40 domain)	sp|P90587|WD66_PHYPO(66 kDa stress protein OS=Physarum polycephalum OX=5791 PE=2 SV=1)
85470	e_gw1.17.209.1	hypothetical protein	1128	2.09909	Up	3.29342e-06	ENOG410YDTE(S:Function unknown)	ENOG410YDTE(sexual development protein)	PF13668.6(Ferritin_2:Ferritin-like domain)
26997	estExt_Genemark1.C_430003	Ubiquitinyl hydrolase	2595	2.09873	Up	2.83076e-71	COG5207(O:Posttranslational modification, protein turnover, chaperones)	COG5207(ubiquitin carboxyl-terminal hydrolase)	PF00443.29(UCH:Ubiquitin carboxyl-terminal hydrolase); PF17807.1(zf-UBP_var:Variant UBP zinc finger); PF02148.19(zf-UBP:Zn-finger in ubiquitin-hydrolases and other protein); PF00627.31(UBA:UBA/TS-N domain); PF13423.6(UCH_1:Ubiquitin carboxyl-terminal hydrolase)	sp|Q11119|UBP14_SCHPO(Ubiquitin carboxyl-terminal hydrolase 14 OS=Schizosaccharomyces pombe (strain 972 / ATCC 24843) OX=284812 GN=ubp14 PE=1 SV=2)
82943	e_gw1.13.468.1	TLDc domain-containing protein 2	1830	2.0936	Up	1.38887e-11	ENOG41117H4(O:Posttranslational modification, protein turnover, chaperones)	ENOG41117H4(May be involved in a process influencing telomere capping (By similarity))	PF07534.16(TLD:TLD); PF08593.10(DUF1773:Domain of unknown function)	sp|C7YJ03|RTC5_NECH7(Restriction of telomere capping protein 5 OS=Nectria haematococca (strain 77-13-4 / ATCC MYA-4622 / FGSC 9596 / MPVI) OX=660122 GN=RTC5 PE=3 SV=1)
33415	fgenesh1_pg.3_#_293	hypothetical protein	3486	2.09358	Up	8.57876e-90	ENOG410XPF6(L:Replication, recombination and repair)	ENOG410XPF6(DNA- binding protein)	PF10433.9(MMS1_N:Mono-functional DNA-alkylating methyl methanesulfonate N-term); PF03178.15(CPSF_A:CPSF A subunit region)	sp|Q9M0V3|DDB1A_ARATH(DNA damage-binding protein 1a OS=Arabidopsis thaliana OX=3702 GN=DDB1A PE=1 SV=1)
64019	gw1.3.1478.1	Mitochondrial import protein Pam17	450	2.09281	Up	7.67854e-27	ENOG4111S4N(U:Intracellular trafficking, secretion, and vesicular transport)	ENOG4111S4N(Component of the PAM complex, a complex required for the translocation of transit peptide-containing proteins from the inner membrane into the mitochondrial matrix in an ATP-dependent manner)	PF08566.10(Pam17:Mitochondrial import protein Pam17)	sp|Q4ICM9|PAM17_GIBZE(Presequence translocated-associated motor subunit PAM17, mitochondrial OS=Gibberella zeae (strain PH-1 / ATCC MYA-4620 / FGSC 9075 / NRRL 31084) OX=229533 GN=PAM17 PE=3 SV=1)
137491	estExt_fgenesh1_pm.C_100189	Cytochrome b5	781	2.09275	Up	7.36842e-72	ENOG4111UG0(S:Function unknown)	ENOG4111UG0(-)	PF00173.28(Cyt-b5:Cytochrome b5-like Heme/Steroid binding domain)	sp|A2CES0|NEUFC_DANRE(Neuferricin OS=Danio rerio OX=7955 GN=cyb5d2 PE=3 SV=1)
138912	estExt_fgenesh1_pm.C_250082	hypothetical protein	3018	2.08582	Up	3.53934e-39	ENOG4111H0C(S:Function unknown)	ENOG4111H0C(Spinocerebellar ataxia type 10 protein domain)	PF09759.9(Atx10homo_assoc:Spinocerebellar ataxia type 10 protein domain)
104845	estExt_Genewise1Plus.C_380108	hypothetical protein	2014	2.08478	Up	1.09347e-16	COG2132(M:Cell wall/membrane/envelope biogenesis)	COG2132(phospholipase C)	PF07732.15(Cu-oxidase_3:Multicopper oxidase); PF07731.14(Cu-oxidase_2:Multicopper oxidase); PF00394.22(Cu-oxidase:Multicopper oxidase)	sp|J9VY90|LAC1_CRYNH(Laccase-1 OS=Cryptococcus neoformans var. grubii serotype A (strain H99 / ATCC 208821 / CBS 10515 / FGSC 9487) OX=235443 GN=LAC1 PE=1 SV=1)
73093	e_gw1.3.159.1	hypothetical protein	1491	2.08477	Up	2.78618e-16	ENOG410YU5Y(S:Function unknown); ENOG410YQJX(S:Function unknown)	ENOG410YU5Y(-); ENOG410YQJX(-)
12412	gm1.7968_g	hypothetical protein	1062	2.08318	Up	4.83038e-07	ENOG410YRKC(S:Function unknown)	ENOG410YRKC(-)
116127	estExt_Genewise1.C_330194	ATP-binding cassette transporter ABC1	4600	2.08153	Up	2.55792e-09	COG0842(S:Function unknown)	COG0842(-)	PF01061.24(ABC2_membrane:ABC-2 type transporter); PF00005.27(ABC_tran:ABC transporter); PF06422.12(PDR_CDR:CDR ABC transporter); PF14510.6(ABC_trans_N:ABC-transporter N-terminal); PF13191.6(AAA_16:AAA ATPase domain); PF13671.6(AAA_33:AAA domain); PF03193.16(RsgA_GTPase:RsgA GTPase); PF13481.6(AAA_25:AAA domain); PF02463.19(SMC_N:RecF/RecN/SMC N terminal domain); PF13238.6(AAA_18:AAA domain)	sp|Q4WWW3|ATRI_ASPFU(ABC multidrug transporter atrI OS=Neosartorya fumigata (strain ATCC MYA-4609 / Af293 / CBS 101355 / FGSC A1100) OX=330879 GN=atrI PE=2 SV=1)
13150	gm1.8706_g	Rft-1-domain containing protein	1749	2.08112	Up	6.10688e-20	ENOG410Y1D5(U:Intracellular trafficking, secretion, and vesicular transport)	ENOG410Y1D5(RFT1 homolog)	PF04506.13(Rft-1:Rft protein); PF01943.17(Polysacc_synt:Polysaccharide biosynthesis protein)	sp|Q6C6S3|RFT1_YARLI(Oligosaccharide translocation protein RFT1 OS=Yarrowia lipolytica (strain CLIB 122 / E 150) OX=284591 GN=RFT1 PE=3 SV=1)
35684	fgenesh1_pg.9_#_205	hypothetical protein	660	2.07745	Up	3.22848e-13	ENOG410ZHJC(S:Function unknown)	ENOG410ZHJC(RING)	PF00097.25(zf-C3HC4:Zinc finger, C3HC4 type (RING finger)); PF13639.6(zf-RING_2:Ring finger domain); PF13445.6(zf-RING_UBOX:RING-type zinc-finger); PF14634.6(zf-RING_5:zinc-RING finger domain); PF14447.6(Prok-RING_4:Prokaryotic RING finger family 4); PF13920.6(zf-C3HC4_3:Zinc finger, C3HC4 type (RING finger)); PF13923.6(zf-C3HC4_2:Zinc finger, C3HC4 type (RING finger)); PF15227.6(zf-C3HC4_4:zinc …
113692	estExt_Genewise1.C_18_t10065	Secretory pathway Sec39	2860	2.07739	Up	1.80361e-50	ENOG4111C64(U:Intracellular trafficking, secretion, and vesicular transport)	ENOG4111C64(protein transport protein Sec39)	PF08314.11(Sec39:Secretory pathway protein Sec39)	sp|O14266|SEC39_SCHPO(Protein transport protein sec39 OS=Schizosaccharomyces pombe (strain 972 / ATCC 24843) OX=284812 GN=sec39 PE=3 SV=1)
9981	gm1.5537_g	endosomal peripheral membrane protein	5139	2.07558	Up	4.34598e-53	ENOG410XQA8(S:Function unknown)	ENOG410XQA8(MON2 homolog (S. cerevisiae))	PF16213.5(DCB:Dimerisation and cyclophilin-binding domain of Mon2); PF12783.7(Sec7_N:Guanine nucleotide exchange factor in Golgi transport N-terminal); PF16206.5(Mon2_C:C-terminal region of Mon2 protein); PF09324.10(DUF1981:Domain of unknown function (DUF1981))	sp|Q09853|MON2_SCHPO(Protein MON2 homolog OS=Schizosaccharomyces pombe (strain 972 / ATCC 24843) OX=284812 GN=mon2 PE=1 SV=1)
142122	estExt_fgenesh1_pg.C_150100	hypothetical protein	1266	2.07489	Up	2.38886e-10	ENOG410XU00(S:Function unknown)	ENOG410XU00(-)
86021	e_gw1.18.237.1	MFS general substrate transporter	1674	2.0732	Up	3.58758e-22	ENOG410XNQK(S:Function unknown)	ENOG410XNQK(-)	PF07690.16(MFS_1:Major Facilitator Superfamily); PF00083.24(Sugar_tr:Sugar (and other) transporter)	sp|B5BP47|YP53_SCHPO(Uncharacterized transporter C460.03 OS=Schizosaccharomyces pombe (strain 972 / ATCC 24843) OX=284812 GN=SPBC460.03 PE=3 SV=1)
25940	estExt_Genemark1.C_170165	endo-1%2C4-beta-glucanase V	856	2.07227	Up	0	ENOG410YDK7(G:Carbohydrate transport and metabolism); ENOG4110B56(S:Function unknown)	ENOG410YDK7(hydrolase family 45); ENOG4110B56(Glycosyl hydrolase family 45)	PF00734.18(CBM_1:Fungal cellulose binding domain); PF03330.18(DPBB_1:Lytic transglycolase)	sp|P43317|GUN5_HYPJE(Endoglucanase-5 OS=Hypocrea jecorina OX=51453 GN=egl5 PE=3 SV=1)
103141	estExt_Genewise1Plus.C_220403	hypothetical protein	1583	2.07138	Up	1.40646e-05	ENOG4111S6Y(S:Function unknown)	ENOG4111S6Y(NACHT domain)	PF00172.18(Zn_clus:Fungal Zn(2)-Cys(6) binuclear cluster domain)
128261	fgenesh1_pm.4_#_258	hypothetical protein	1296	2.06929	Up	9.28968e-11	ENOG410XYYN(S:Function unknown)	ENOG410XYYN(rad9 homolog)	PF04139.13(Rad9:Rad9)	sp|P48013|RAD9_SCHOT(DNA repair protein rad9 OS=Schizosaccharomyces octosporus OX=4899 GN=rad9 PE=2 SV=1)
59212	gw1.32.132.1	putative conserved membrane protein	858	2.06858	Up	1.85639e-07	ENOG4111YJN(S:Function unknown)	ENOG4111YJN(conserved membrane protein)	PF13373.6(DUF2407_C:DUF2407 C-terminal domain); PF10302.9(DUF2407:DUF2407 ubiquitin-like domain); PF00240.23(ubiquitin:Ubiquitin family)	sp|Q9HE10|DSC3_SCHPO(DSC E3 ubiquitin ligase complex subunit 3 OS=Schizosaccharomyces pombe (strain 972 / ATCC 24843) OX=284812 GN=dsc3 PE=1 SV=1)
10732	gm1.6288_g	oxidoreductase	888	2.06828	Up	0.000160729	COG1028(G:Carbohydrate transport and metabolism)	COG1028(Transaldolase is important for the balance of metabolites in the pentose-phosphate pathway (By similarity))	PF13561.6(adh_short_C2:Enoyl-(Acyl carrier protein) reductase); PF00106.25(adh_short:short chain dehydrogenase); PF08659.10(KR:KR domain)	sp|P50166|ARDH_CANTR(D-arabinitol 2-dehydrogenase [ribulose-forming] OS=Candida tropicalis OX=5482 GN=ARD PE=1 SV=1)
129236	fgenesh1_pm.6_#_370	solute carrier family 12 protein	3651	2.06595	Up	8.63534e-24	COG0531(E:Amino acid transport and metabolism)	COG0531(amino acid transport)	PF00324.21(AA_permease:Amino acid permease); PF03522.15(SLC12:Solute carrier family 12); PF13520.6(AA_permease_2:Amino acid permease)	sp|P38329|VHC1_YEAST(Vacuolar cation-chloride cotransporter 1 OS=Saccharomyces cerevisiae (strain ATCC 204508 / S288c) OX=559292 GN=VHC1 PE=1 SV=1)
5410	gm1.966_g	hypothetical protein	1005	2.06559	Up	0.000160729	ENOG4110XJZ(S:Function unknown)	ENOG4110XJZ(-)
25456	estExt_Genemark1.C_120205	aldo/keto reductase	1175	2.06496	Up	8.02674e-106	COG0667(S:Function unknown)	COG0667(Eukaryotic aspartyl protease)	PF00248.21(Aldo_ket_red:Aldo/keto reductase family)	sp|P42884|AAD14_YEAST(Putative aryl-alcohol dehydrogenase AAD14 OS=Saccharomyces cerevisiae (strain ATCC 204508 / S288c) OX=559292 GN=AAD14 PE=1 SV=1)
88834	e_gw1.24.436.1	hypothetical protein	1152	2.06392	Up	7.14836e-08	ENOG410YGU3(J:Translation, ribosomal structure and biogenesis)	ENOG410YGU3(Plays a central role in 2-thiolation of mcm(5)S(2)U at tRNA wobble positions of tRNA(Lys), tRNA(Glu) and tRNA(Gln). May act by forming a heterodimer with NCS6 that ligates sulfur from thiocarboxylated URM1 onto the uridine of tRNAs at wobble position. Prior mcm(5) tRNA modification by the elongator complex is required for 2-thiolation. May also be involved in protein urmylation (By si…	PF10288.9(CTU2:Cytoplasmic tRNA 2-thiolation protein 2)	sp|A7F190|CTU2_SCLS1(Cytoplasmic tRNA 2-thiolation protein 2 OS=Sclerotinia sclerotiorum (strain ATCC 18683 / 1980 / Ss-1) OX=665079 GN=ncs2 PE=3 SV=1)
4842	gm1.398_g	hypothetical protein	1131	2.06154	Up	5.34944e-06
70894	e_gw1.2.2045.1	hypothetical protein	1149	2.0612	Up	0.000160729	ENOG410YISJ(S:Function unknown)	ENOG410YISJ(Conserved hypothetical, protein)	PF11905.8(DUF3425:Domain of unknown function (DUF3425))
35404	fgenesh1_pg.8_#_194	pre-mRNA-splicing factor ATP-dependent RNA helicase prp22	2043	2.0603	Up	0.000160729	COG1643(S:Function unknown)	COG1643(CUE domain protein)	PF04408.23(HA2:Helicase associated domain (HA2)); PF07717.16(OB_NTP_bind:Oligonucleotide/oligosaccharide-binding (OB)-fold); PF00271.31(Helicase_C:Helicase conserved C-terminal domain); PF13401.6(AAA_22:AAA domain)	sp|Q9H5Z1|DHX35_HUMAN(Probable ATP-dependent RNA helicase DHX35 OS=Homo sapiens OX=9606 GN=DHX35 PE=1 SV=2)
38918	fgenesh1_pg.28_#_11	FAD/NAD(P)-binding domain-containing protein	1176	2.06015	Up	1.4081e-11	COG0654(P:Inorganic ion transport and metabolism)	COG0654(Monooxygenase)	PF01494.19(FAD_binding_3:FAD binding domain)	sp|Q2I0M6|CTB3_CERNC(Dual O-methyltransferase/FAD-dependent monooxygenase CTB3 OS=Cercospora nicotianae OX=29003 GN=CTB3 PE=1 SV=2)
94633	estExt_Genewise1Plus.C_1_t40499	hypothetical protein	1986	2.06012	Up	0	ENOG410Y6R3(S:Function unknown)	ENOG410Y6R3(Conserved hypothetical, protein)	PF10361.9(DUF2434:Protein of unknown function (DUF2434))	sp|Q10260|YD2C_SCHPO(Uncharacterized protein C56F8.12 OS=Schizosaccharomyces pombe (strain 972 / ATCC 24843) OX=284812 GN=SPAC56F8.12 PE=4 SV=1)
75344	e_gw1.5.482.1	UBX domain protein	1545	2.05876	Up	3.11744e-76	ENOG410XSFS(S:Function unknown)	ENOG410XSFS(Fas associated factor family member 2)	PF00789.20(UBX:UBX domain); PF14555.6(UBA_4:UBA-like domain)	sp|O74498|UCP10_SCHPO(UBX domain-containing protein 10 OS=Schizosaccharomyces pombe (strain 972 / ATCC 24843) OX=284812 GN=ucp10 PE=3 SV=1)
5623	gm1.1179_g	putative C2H2 finger domain protein	714	2.05855	Up	3.84974e-10	ENOG4111GW4(S:Function unknown)	ENOG4111GW4(Zinc finger, matrin-type)	PF12171.8(zf-C2H2_jaz:Zinc-finger double-stranded RNA-binding); PF12874.7(zf-met:Zinc-finger of C2H2 type); PF08648.12(SNRNP27:U4/U6.U5 small nuclear ribonucleoproteins)	sp|Q09776|SNU23_SCHPO(U4/U6.U5 small nuclear ribonucleoprotein component snu23 OS=Schizosaccharomyces pombe (strain 972 / ATCC 24843) OX=284812 GN=snu23 PE=3 SV=4)
67872	e_gw1.1.1248.1	Mak10-domain containing protein	2280	2.05799	Up	5.457e-24	ENOG410XS3T(S:Function unknown)	ENOG410XS3T(N(Alpha)-acetyltransferase 35, NatC auxiliary)	PF04112.13(Mak10:Mak10 subunit, NatC N(alpha)-terminal acetyltransferase)	sp|Q7T322|NAA35_DANRE(N-alpha-acetyltransferase 35, NatC auxiliary subunit OS=Danio rerio OX=7955 GN=naa35 PE=2 SV=1)
97622	estExt_Genewise1Plus.C_5_t20500	MFS general substrate transporter	1392	2.05669	Up	2.75738e-08	ENOG4111MMB(S:Function unknown); COG0477(S:Function unknown); ENOG410XRHC(E:Amino acid transport and metabolism)	ENOG4111MMB(Conserved hypothetical, protein); COG0477(Conserved hypothetical, protein); ENOG410XRHC(solute carrier family 16, member 10 (aromatic amino acid transporter))	PF07690.16(MFS_1:Major Facilitator Superfamily); PF13347.6(MFS_2:MFS/sugar transport protein)	sp|B8N0F1|ASAE_ASPFN(MFS transporter asaE OS=Aspergillus flavus (strain ATCC 200026 / FGSC A1120 / NRRL 3357 / JCM 12722 / SRRC 167) OX=332952 GN=asaE PE=2 SV=1)
142607	estExt_fgenesh1_pg.C_210111	hypothetical protein	4257	2.05568	Up	2.4532e-37	COG0842(S:Function unknown)	COG0842(-)	PF01061.24(ABC2_membrane:ABC-2 type transporter); PF00005.27(ABC_tran:ABC transporter); PF06422.12(PDR_CDR:CDR ABC transporter); PF13671.6(AAA_33:AAA domain); PF13481.6(AAA_25:AAA domain); PF03193.16(RsgA_GTPase:RsgA GTPase)	sp|Q4WDD4|ATRF_ASPFU(ABC multidrug transporter atrF OS=Neosartorya fumigata (strain ATCC MYA-4609 / Af293 / CBS 101355 / FGSC A1100) OX=330879 GN=atrF PE=2 SV=1)
98413	estExt_Genewise1Plus.C_7_t20167	Sodium/hydrogen exchanger family protein	2863	2.0544	Up	9.1404e-67	COG0475(P:Inorganic ion transport and metabolism)	COG0475(Sodium hydrogen exchanger)	PF00999.21(Na_H_Exchanger:Sodium/hydrogen exchanger family)	sp|Q9P7I1|KHA1_SCHPO(K(+)/H(+) antiporter 1 OS=Schizosaccharomyces pombe (strain 972 / ATCC 24843) OX=284812 GN=kha1 PE=3 SV=2)
104493	estExt_Genewise1Plus.C_330131	MED7-domain containing protein	872	2.0541	Up	4.54372e-16	ENOG410ZFRU(K:Transcription)	ENOG410ZFRU(Component of the Mediator complex, a coactivator involved in the regulated transcription of nearly all RNA polymerase II-dependent genes. Mediator functions as a bridge to convey information from gene-specific regulatory proteins to the basal RNA polymerase II transcription machinery. Mediator is recruited to promoters by direct interactions with regulatory proteins and serves as a sc…	PF05983.11(Med7:MED7 protein)	sp|Q2GRJ3|MED7_CHAGB(Mediator of RNA polymerase II transcription subunit 7 OS=Chaetomium globosum (strain ATCC 6205 / CBS 148.51 / DSM 1962 / NBRC 6347 / NRRL 1970) OX=306901 GN=MED7 PE=3 SV=1)
74733	e_gw1.4.26.1	MutS2 protein	2706	2.05364	Up	2.96036e-15	COG0249(L:Replication, recombination and repair)	COG0249(that it carries out the mismatch recognition step. This protein has a weak ATPase activity (By similarity))	PF00488.21(MutS_V:MutS domain V); PF05192.18(MutS_III:MutS domain III); PF01624.20(MutS_I:MutS domain I); PF05188.17(MutS_II:MutS domain II)	sp|O13921|MSH1_SCHPO(MutS protein homolog 1 OS=Schizosaccharomyces pombe (strain 972 / ATCC 24843) OX=284812 GN=msh1 PE=3 SV=2)
91199	e_gw1.31.6.1	putative aldo/keto reductase	990	2.05311	Up	6.03826e-05	COG0667(S:Function unknown)	COG0667(monooxygenase)	PF00248.21(Aldo_ket_red:Aldo/keto reductase family)	sp|O14295|PLR1_SCHPO(Pyridoxal reductase OS=Schizosaccharomyces pombe (strain 972 / ATCC 24843) OX=284812 GN=plr1 PE=1 SV=1)
36251	fgenesh1_pg.11_#_221	Histone-fold-containing protein	882	2.05209	Up	7.81364e-07	ENOG4111QSW(K:Transcription)	ENOG4111QSW(polymerase (DNA directed), epsilon 3, accessory subunit)	PF00808.23(CBFD_NFYB_HMF:Histone-like transcription factor (CBF/NF-Y) and archaeal histone); PF00125.24(Histone:Core histone H2A/H2B/H3/H4)	sp|P87174|DPB4_SCHPO(DNA polymerase epsilon subunit D OS=Schizosaccharomyces pombe (strain 972 / ATCC 24843) OX=284812 GN=dpb4 PE=1 SV=1)
126704	fgenesh1_pm.2_#_29	hypothetical protein	1596	2.05196	Up	1.14917e-30	COG0476(S:Function unknown)	COG0476(cyclin B1 interacting protein 1, E3 ubiquitin protein ligase)	PF00899.21(ThiF:ThiF family)	sp|Q8VBW6|ULA1_MOUSE(NEDD8-activating enzyme E1 regulatory subunit OS=Mus musculus OX=10090 GN=Nae1 PE=1 SV=1)
137904	estExt_fgenesh1_pm.C_130188	2-oxoisovalerate dehydrogenase beta subunit precursor	1229	2.04972	Up	1.78096e-16	COG0022(O:Posttranslational modification, protein turnover, chaperones)	COG0022(capping protein (actin filament) muscle Z-line, alpha)	PF02779.24(Transket_pyr:Transketolase, pyrimidine binding domain); PF02780.20(Transketolase_C:Transketolase, C-terminal domain); PF17147.4(PFOR_II:Pyruvate:ferredoxin oxidoreductase core domain II)	sp|Q55FN7|ODBB_DICDI(2-oxoisovalerate dehydrogenase subunit beta, mitochondrial OS=Dictyostelium discoideum OX=44689 GN=bkdB PE=3 SV=1)
53025	gw1.17.272.1	S-adenosyl-L-methionine-dependent methyltransferase	750	2.04691	Up	2.73862e-17	ENOG4111E3M(S:Function unknown)	ENOG4111E3M(ubiE/COQ5 methyltransferase family)	PF13649.6(Methyltransf_25:Methyltransferase domain); PF08241.12(Methyltransf_11:Methyltransferase domain); PF13847.6(Methyltransf_31:Methyltransferase domain); PF01209.18(Ubie_methyltran:ubiE/COQ5 methyltransferase family); PF08242.12(Methyltransf_12:Methyltransferase domain); PF13489.6(Methyltransf_23:Methyltransferase domain)	sp|B6HJU2|ROQN_PENRW(Glandicoline B O-methyltransferase roqN OS=Penicillium rubens (strain ATCC 28089 / DSM 1075 / NRRL 1951 / Wisconsin 54-1255) OX=500485 GN=roqN PE=1 SV=1)
69061	e_gw1.1.2634.1	FAS1 domain-containing protein	1236	2.04616	Up	0	COG0723(S:Function unknown); ENOG4111WTG(S:Function unknown)	COG0723(-); ENOG4111WTG(fasciclin domain family protein)	PF02469.22(Fasciclin:Fasciclin domain)	sp|I1RF63|AURS_GIBZE(Aurofusarin biosynthesis cluster protein S OS=Gibberella zeae (strain PH-1 / ATCC MYA-4620 / FGSC 9075 / NRRL 31084) OX=229533 GN=aurS PE=1 SV=1)
137363	estExt_fgenesh1_pm.C_90214	2-nitropropane dioxygenase precursor	1280	2.04422	Up	1.27376e-13	COG2070(S:Function unknown)	COG2070(Dehydrogenase)	PF03060.15(NMO:Nitronate monooxygenase); PF00478.25(IMPDH:IMP dehydrogenase / GMP reductase domain); PF01070.18(FMN_dh:FMN-dependent dehydrogenase); PF01645.17(Glu_synthase:Conserved region in glutamate synthase)	sp|Q01284|2NPD_NEUCR(Nitronate monooxygenase OS=Neurospora crassa (strain ATCC 24698 / 74-OR23-1A / CBS 708.71 / DSM 1257 / FGSC 987) OX=367110 GN=ncd-2 PE=1 SV=1)
24116	estExt_Genemark1.C_3_t20016	hypothetical protein	1145	2.04235	Up	1.59635e-09	ENOG4111Q30(S:Function unknown)	ENOG4111Q30(Conserved hypothetical, protein)
85518	e_gw1.17.179.1	Protein prenylyltransferase	1008	2.04182	Up	1.07437e-17	ENOG41123BY(S:Function unknown)	ENOG41123BY(Conserved hypothetical, protein)	PF01239.22(PPTA:Protein prenyltransferase alpha subunit repeat)
107747	estExt_Genewise1.C_3_t10144	6-phosphogluconate dehydrogenase	1680	2.03806	Up	0	COG0362(G:Carbohydrate transport and metabolism)	COG0362(Catalyzes the oxidative decarboxylation of 6- phosphogluconate to ribulose 5-phosphate and CO(2), with concomitant reduction of NADP to NADPH (By similarity))	PF00393.19(6PGD:6-phosphogluconate dehydrogenase, C-terminal domain); PF03446.15(NAD_binding_2:NAD binding domain of 6-phosphogluconate dehydrogenase)	sp|P38720|6PGD1_YEAST(6-phosphogluconate dehydrogenase, decarboxylating 1 OS=Saccharomyces cerevisiae (strain ATCC 204508 / S288c) OX=559292 GN=GND1 PE=1 SV=1)
126916	fgenesh1_pm.2_#_241	MFS general substrate transporter	1659	2.0377	Up	3.60888e-42	ENOG410XVXG(U:Intracellular trafficking, secretion, and vesicular transport); COG0477(U:Intracellular trafficking, secretion, and vesicular transport)	ENOG410XVXG(Major Facilitator Superfamily); COG0477(Major Facilitator Superfamily)	PF07690.16(MFS_1:Major Facilitator Superfamily); PF00083.24(Sugar_tr:Sugar (and other) transporter)	sp|O13714|YDZ7_SCHPO(Uncharacterized membrane protein C14C4.07 OS=Schizosaccharomyces pombe (strain 972 / ATCC 24843) OX=284812 GN=SPAC14C4.07 PE=1 SV=1)
126658	fgenesh1_pm.1_#_1072	Cytochrome P450	1731	2.03765	Up	4.44108e-08	COG2124(G:Carbohydrate transport and metabolism)	COG2124(SMP-30 gluconolaconase LRE domain protein)	PF00067.22(p450:Cytochrome P450)	sp|Q9C1I4|TRI13_FUSSP(Cytochrome P450 monooxygenase TRI13 OS=Fusarium sporotrichioides OX=5514 GN=TRI13 PE=2 SV=2)
40963	gw1.8.37.1	hypothetical protein	2334	2.03671	Up	6.19054e-10	ENOG41126YA(S:Function unknown)	ENOG41126YA(Leucine Rich Repeat)
55393	gw1.32.110.1	DNA repair exonuclease	1650	2.03588	Up	6.19054e-10	COG0420(L:Replication, recombination and repair)	COG0420(Exonuclease)	PF04152.14(Mre11_DNA_bind:Mre11 DNA-binding presumed domain); PF00149.28(Metallophos:Calcineurin-like phosphoesterase); PF12850.7(Metallophos_2:Calcineurin-like phosphoesterase superfamily domain)	sp|Q9C291|MRE11_NEUCR(Double-strand break repair protein mus-23 OS=Neurospora crassa (strain ATCC 24698 / 74-OR23-1A / CBS 708.71 / DSM 1257 / FGSC 987) OX=367110 GN=mus-23 PE=3 SV=3)
34774	fgenesh1_pg.6_#_349	polyketide synthase	7869	2.03477	Up	2.4705e-38	ENOG410XNPJ(E:Amino acid transport and metabolism)	ENOG410XNPJ(Catalyzes the condensation of (S)-aspartate-beta- semialdehyde (S)-ASA and pyruvate to 4-hydroxy- tetrahydrodipicolinate (HTPA) (By similarity))	PF00109.26(ketoacyl-synt:Beta-ketoacyl synthase, N-terminal domain); PF08659.10(KR:KR domain); PF00698.21(Acyl_transf_1:Acyl transferase domain); PF14765.6(PS-DH:Polyketide synthase dehydratase); PF02801.22(Ketoacyl-synt_C:Beta-ketoacyl synthase, C-terminal domain); PF08242.12(Methyltransf_12:Methyltransferase domain); PF00107.26(ADH_zinc_N:Zinc-binding dehydrogenase); PF16197.5(KAsynt_C_assoc:Ke…	sp|Q5KTM9|ALT5_ALTSO(Highly reducing polyketide synthase alt5 OS=Alternaria solani OX=48100 GN=alt5 PE=1 SV=1)
23372	estExt_Genemark1.C_1_t20152	Kinesin-domain containing protein	3565	2.0335	Up	1.49522e-21	COG5059(S:Function unknown)	COG5059(glycoside hydrolase family 79 protein)	PF00225.23(Kinesin:Kinesin motor domain); PF16796.5(Microtub_bd:Microtubule binding)	sp|O14343|KLP5_SCHPO(Kinesin-like protein 5 OS=Schizosaccharomyces pombe (strain 972 / ATCC 24843) OX=284812 GN=klp5 PE=1 SV=1)
102517	estExt_Genewise1Plus.C_19_t20059	Alpha-N-arabinofuranosidase	1738	2.02975	Up	0.000260946	ENOG410XSPY(G:Carbohydrate transport and metabolism)	ENOG410XSPY(Alpha-N-arabinofuranosidase involved in the degradation of arabinoxylan, a major component of plant hemicellulose. Able to hydrolyze 1,5-, 1,3- and 1,2-alpha-linkages not only in L- arabinofuranosyl oligosaccharides, but also in polysaccharides containing terminal non-reducing L-arabinofuranoses in side chains, like L-arabinan, arabinogalactan and arabinoxylan)	PF09206.11(ArabFuran-catal:Alpha-L-arabinofuranosidase B, catalytic); PF05270.13(AbfB:Alpha-L-arabinofuranosidase B (ABFB) domain)	sp|Q92455|ABF1_HYPJE(Alpha-L-arabinofuranosidase OS=Hypocrea jecorina OX=51453 GN=abf1 PE=2 SV=1)
89588	e_gw1.26.152.1	hypothetical protein	2301	2.0288	Up	1.25974e-06	ENOG4110XHB(S:Function unknown); ENOG4110WXY(S:Function unknown); ENOG410ZEPC(S:Function unknown)	ENOG4110XHB(Fungal Zn(2)-Cys(6) binuclear cluster domain); ENOG4110WXY(Fungal specific transcription factor domain); ENOG410ZEPC(Fungal specific transcription factor domain)	PF00172.18(Zn_clus:Fungal Zn(2)-Cys(6) binuclear cluster domain)
90534	e_gw1.29.124.1	hypothetical protein	2892	2.02801	Up	2.14576e-12	ENOG410XXPY(S:Function unknown)	ENOG410XXPY(gamma-tubulin complex component GCP6)	PF04130.13(GCP_C_terminal:Gamma tubulin complex component C-terminal); PF17681.1(GCP_N_terminal:Gamma tubulin complex component N-terminal)
71836	e_gw1.2.783.1	S-adenosyl-L-methionine-dependent methyltransferase	1086	2.02352	Up	6.27588e-65	COG0500(A:RNA processing and modification)	COG0500(Functions as component of the Arp2 3 complex which is involved in regulation of actin polymerization and together with an activating nucleation-promoting factor (NPF) mediates the formation of branched actin networks (By similarity))	PF08241.12(Methyltransf_11:Methyltransferase domain); PF13489.6(Methyltransf_23:Methyltransferase domain); PF08242.12(Methyltransf_12:Methyltransferase domain); PF13649.6(Methyltransf_25:Methyltransferase domain); PF13847.6(Methyltransf_31:Methyltransferase domain)	sp|A3KP37|NDUF5_DANRE(Arginine-hydroxylase NDUFAF5, mitochondrial OS=Danio rerio OX=7955 GN=ndufaf5 PE=2 SV=1)
34652	fgenesh1_pg.6_#_227	cullin binding protein CanA	4044	2.02331	Up	7.35362e-87	ENOG410XPK4(O:Posttranslational modification, protein turnover, chaperones)	ENOG410XPK4(cullin-associated and neddylation-dissociated)	PF08623.10(TIP120:TATA-binding protein interacting (TIP20)); PF12717.7(Cnd1:non-SMC mitotic condensation complex subunit 1); PF00790.19(VHS:VHS domain)	sp|Q5BAH2|CAN1C_EMENI(Cullin-associated NEDD8-dissociated protein 1, C-terminal part OS=Emericella nidulans (strain FGSC A4 / ATCC 38163 / CBS 112.46 / NRRL 194 / M139) OX=227321 GN=candA-C PE=1 SV=1)
11982	gm1.7538_g	hypothetical protein	4380	2.02062	Up	1.11641e-32	ENOG4112A5G(S:Function unknown)	ENOG4112A5G(C-x8-C-x5-C-x3-H type zinc finger protein)	PF18044.1(zf-CCCH_4:CCCH-type zinc finger); PF18345.1(zf_CCCH_4:Zinc finger domain); PF00642.24(zf-CCCH:Zinc finger C-x8-C-x5-C-x3-H type (and similar))
125665	fgenesh1_pm.1_#_79	CwfJ domain protein	1647	2.0177	Up	3.2969e-06	ENOG410XNRG(S:Function unknown)	ENOG410XNRG(CWF19-like 1, cell cycle control (S. pombe))	PF04677.15(CwfJ_C_1:Protein similar to CwfJ C-terminus 1); PF04676.14(CwfJ_C_2:Protein similar to CwfJ C-terminus 2)	sp|Q10414|MU161_SCHPO(CWF19-like protein mug161 OS=Schizosaccharomyces pombe (strain 972 / ATCC 24843) OX=284812 GN=mug161 PE=1 SV=1)
131868	fgenesh1_pm.15_#_189	hypothetical protein	2394	2.01618	Up	3.74288e-69	ENOG410ZV61(S:Function unknown)	ENOG410ZV61(-)	PF12697.7(Abhydrolase_6:Alpha/beta hydrolase family)	sp|P47139|YJ68_YEAST(Uncharacterized protein YJR098C OS=Saccharomyces cerevisiae (strain ATCC 204508 / S288c) OX=559292 GN=YJR098C PE=1 SV=2)
23559	estExt_Genemark1.C_2_t10008	FAD/NAD(P)-binding domain-containing protein	1522	2.01458	Up	1.65667e-96	COG0493(E:Amino acid transport and metabolism)	COG0493(metal cluster binding)	PF07992.14(Pyr_redox_2:Pyridine nucleotide-disulphide oxidoreductase)	sp|O59710|ADRO_SCHPO(Probable NADPH:adrenodoxin oxidoreductase, mitochondrial OS=Schizosaccharomyces pombe (strain 972 / ATCC 24843) OX=284812 GN=arh1 PE=3 SV=1)
12566	gm1.8122_g	Alpha-galactosidase 2	2241	2.01375	Up	9.11918e-23	COG3345(G:Carbohydrate transport and metabolism)	COG3345(alpha-galactosidase)	PF02065.18(Melibiase:Melibiase); PF16875.5(Glyco_hydro_36N:Glycosyl hydrolase family 36 N-terminal domain); PF16874.5(Glyco_hydro_36C:Glycosyl hydrolase family 36 C-terminal domain); PF02638.15(GHL10:Glycosyl hydrolase-like 10)	sp|Q92457|AGAL2_HYPJE(Alpha-galactosidase 2 OS=Hypocrea jecorina OX=51453 GN=agl2 PE=1 SV=1)
128819	fgenesh1_pm.5_#_357	Ubiquinone biosynthesis protein coq4%2C mitochondrial	780	2.01342	Up	9.89756e-66	COG5031(H:Coenzyme transport and metabolism)	COG5031(Component of the coenzyme Q biosynthetic pathway. May play a role in organizing a multi-subunit COQ enzyme complex required for coenzyme Q biosynthesis. Required for steady-state levels of other COQ polypeptides (By similarity))	PF05019.13(Coq4:Coenzyme Q (ubiquinone) biosynthesis protein Coq4)	sp|A6SS55|COQ4_BOTFB(Ubiquinone biosynthesis protein coq4, mitochondrial OS=Botryotinia fuckeliana (strain B05.10) OX=332648 GN=coq4 PE=3 SV=1)
84843	e_gw1.16.38.1	DUF689-domain containing protein	972	2.01297	Up	6.0589e-40	COG5636(S:Function unknown)	COG5636(Component of the cytosolic iron-sulfur (Fe S) protein assembly machinery. Required for the maturation of extramitochondrial Fe S proteins (By similarity). Has anti- apoptotic effects in the cell. Involved in negative control of H(2)O(2)-induced cell death, probably by tethering the pro- apoptotic factor tah18 in the cytoplasm in the absence of oxidative stress (By similarity))	PF05093.13(CIAPIN1:Cytokine-induced anti-apoptosis inhibitor 1, Fe-S biogenesis); PF16803.5(DRE2_N:Fe-S cluster assembly protein DRE2 N-terminus)	sp|C7YRS7|DRE2_NECH7(Fe-S cluster assembly protein DRE2 OS=Nectria haematococca (strain 77-13-4 / ATCC MYA-4622 / FGSC 9596 / MPVI) OX=660122 GN=DRE2 PE=3 SV=1)
111892	estExt_Genewise1.C_11_t20171	putative glutamate-1-semialdehyde 2%2C1-aminomutase	1410	2.0115	Up	4.98194e-14	COG0001(H:Coenzyme transport and metabolism)	COG0001(Glutamate-1-semialdehyde aminotransferase)	PF00202.21(Aminotran_3:Aminotransferase class-III)	sp|O94492|YC7B_SCHPO(Uncharacterized aminotransferase C417.11c OS=Schizosaccharomyces pombe (strain 972 / ATCC 24843) OX=284812 GN=SPCC417.11c PE=3 SV=2)
70020	e_gw1.1.1399.1	Cytochrome P450	3246	2.01051	Up	9.40206e-22	COG2124(S:Function unknown); COG0369(S:Function unknown)	COG2124(Beta-lactamase); COG0369(Beta-lactamase)	PF00067.22(p450:Cytochrome P450); PF00667.20(FAD_binding_1:FAD binding domain); PF00258.25(Flavodoxin_1:Flavodoxin); PF00175.21(NAD_binding_1:Oxidoreductase NAD-binding domain)	sp|Q9Y8G7|C505_FUSOX(Bifunctional cytochrome P450/NADPH--P450 reductase OS=Fusarium oxysporum OX=5507 GN=CYP505 PE=1 SV=1)
78333	e_gw1.7.100.1	Acyl-CoA dehydrogenase NM domain-like protein	1323	2.00977	Up	1.33289e-25	ENOG410XNMY(S:Function unknown)	ENOG410XNMY(Fungal specific transcription factor domain)	PF00441.24(Acyl-CoA_dh_1:Acyl-CoA dehydrogenase, C-terminal domain); PF02770.19(Acyl-CoA_dh_M:Acyl-CoA dehydrogenase, middle domain); PF02771.16(Acyl-CoA_dh_N:Acyl-CoA dehydrogenase, N-terminal domain); PF08028.11(Acyl-CoA_dh_2:Acyl-CoA dehydrogenase, C-terminal domain)	sp|Q7U0Y2|ACDC_MYCBO(Acyl-CoA dehydrogenase fadE12 OS=Mycobacterium bovis (strain ATCC BAA-935 / AF2122/97) OX=233413 GN=fadE12 PE=3 SV=1)
80217	e_gw1.9.100.1	putative ferric reductase	1908	2.00969	Up	0	ENOG410XNZY(S:Function unknown)	ENOG410XNZY(-)	PF01794.19(Ferric_reduct:Ferric reductase like transmembrane component); PF08022.12(FAD_binding_8:FAD-binding domain); PF08030.12(NAD_binding_6:Ferric reductase NAD binding domain)	sp|Q12333|FRE7_YEAST(Ferric/cupric reductase transmembrane component 7 OS=Saccharomyces cerevisiae (strain ATCC 204508 / S288c) OX=559292 GN=FRE7 PE=1 SV=2)
106116	estExt_Genewise1.C_1_t40252	RabGAP/TBC	2726	2.00937	Up	3.59438e-43	COG5210(K:Transcription)	COG5210(DNA-dependent RNA polymerase catalyzes the transcription of DNA into RNA using the four ribonucleoside triphosphates as substrates)	PF00566.18(RabGAP-TBC:Rab-GTPase-TBC domain)	sp|P48566|GYP3_YEAST(GTPase-activating protein GYP3 OS=Saccharomyces cerevisiae (strain ATCC 204508 / S288c) OX=559292 GN=MSB3 PE=1 SV=1)
24544	estExt_Genemark1.C_60258	methionyl-tRNA synthetase	2123	2.00534	Up	7.83522e-216	COG0143(J:Translation, ribosomal structure and biogenesis)	COG0143(Is required not only for elongation of protein synthesis but also for the initiation of all mRNA translation through initiator tRNA(fMet) aminoacylation (By similarity))	PF09334.11(tRNA-synt_1g:tRNA synthetases class I (M)); PF00133.22(tRNA-synt_1:tRNA synthetases class I (I, L, M and V)); PF01406.19(tRNA-synt_1e:tRNA synthetases class I (C) catalytic domain); PF09190.11(DALR_2:DALR domain)	sp|Q9C2H9|SYMM_NEUCR(Probable methionine--tRNA ligase, mitochondrial OS=Neurospora crassa (strain ATCC 24698 / 74-OR23-1A / CBS 708.71 / DSM 1257 / FGSC 987) OX=367110 GN=93G11.130 PE=3 SV=1)
89214	e_gw1.25.191.1	hypothetical protein	1893	2.00395	Up	2.83532e-32	COG0657(I:Lipid transport and metabolism); ENOG4111XIS(S:Function unknown)	COG0657(alpha beta hydrolase fold-3 domain protein); ENOG4111XIS(Fungal Zn(2)-Cys(6) binuclear cluster domain)	PF11951.8(Fungal_trans_2:Fungal specific transcription factor domain); PF00172.18(Zn_clus:Fungal Zn(2)-Cys(6) binuclear cluster domain)	sp|Q59QC7|UPC2_CANAL(Sterol uptake control protein 2 OS=Candida albicans (strain SC5314 / ATCC MYA-2876) OX=237561 GN=UPC2 PE=1 SV=1)
87668	e_gw1.21.199.1	putative transcriptional repressor	1185	2	Up	1.29536e-26	ENOG4111BNY(S:Function unknown)	ENOG4111BNY(Wd repeat protein)	PF00400.32(WD40:WD domain, G-beta repeat)	sp|O94394|YQF1_SCHPO(Uncharacterized WD repeat-containing protein C126.01c OS=Schizosaccharomyces pombe (strain 972 / ATCC 24843) OX=284812 GN=SPCC126.01c PE=4 SV=2)
73125	e_gw1.3.402.1	putative carbonyl reductase	762	2	Up	1.39498e-05	COG1028(S:Function unknown)	COG1028(Fungal Zn(2)-Cys(6) binuclear cluster domain)	PF00106.25(adh_short:short chain dehydrogenase); PF13561.6(adh_short_C2:Enoyl-(Acyl carrier protein) reductase); PF08659.10(KR:KR domain); PF13460.6(NAD_binding_10:NAD(P)H-binding)	sp|A0A084R1I4|ATR10_STAC4(Short-chain dehydrogenase/reductase ATR10 OS=Stachybotrys chlorohalonata (strain IBT 40285) OX=1283841 GN=ATR10 PE=3 SV=1)
121547	estExt_fgenesh2_kg.C_1_t10158	expressed protein	588	2	Up	1.39498e-05
39947	fgenesh1_pg.50_#_20	hypothetical protein	1857	2	Up	5.30458e-06	ENOG410Y6RC(S:Function unknown)	ENOG410Y6RC(-)	PF11951.8(Fungal_trans_2:Fungal specific transcription factor domain); PF00172.18(Zn_clus:Fungal Zn(2)-Cys(6) binuclear cluster domain)	sp|C9K7C2|AMTR1_ALTAL(Transcription activator AMTR1 OS=Alternaria alternata OX=5599 GN=AMTR1 PE=2 SV=1)
124274	estExt_fgenesh2_kg.C_160124	hypothetical protein	990	1.99886	Up	2.91272e-55	ENOG410YMNV(S:Function unknown)	ENOG410YMNV(-)
101652	estExt_Genewise1Plus.C_16_t10270	hypothetical protein	1587	1.99879	Up	4.22078e-18	ENOG410YSW7(S:Function unknown)	ENOG410YSW7(-)
73263	e_gw1.3.1575.1	putative sphingomyelinase family protein	1464	1.9981	Up	3.61282e-11	ENOG410ZFPY(S:Function unknown)	ENOG410ZFPY(Sphingomyelin phosphodiesterase 2, neutral membrane (Neutral sphingomyelinase))	PF03372.23(Exo_endo_phos:Endonuclease/Exonuclease/phosphatase family)	sp|O74369|CSS1_SCHPO(Inositol phosphosphingolipids phospholipase C OS=Schizosaccharomyces pombe (strain 972 / ATCC 24843) OX=284812 GN=css1 PE=1 SV=2)
76208	e_gw1.5.636.1	hypothetical protein	2136	1.99537	Up	2.97142e-07	ENOG410YDD5(S:Function unknown)	ENOG410YDD5(Fungal specific transcription factor domain)	PF04082.18(Fungal_trans:Fungal specific transcription factor domain); PF00172.18(Zn_clus:Fungal Zn(2)-Cys(6) binuclear cluster domain)	sp|A0A089FQI6|PRLR_FUNXX(Pyrrolocin cluster transcription factor fsdR OS=Fungal sp. (strain NRRL 50135) OX=1547289 GN=prlR PE=3 SV=1)
32670	fgenesh1_pg.2_#_198	pterin 4 alpha carbinolamine dehydratase	474	1.9945	Up	2.97142e-07	COG2154(H:Coenzyme transport and metabolism)	COG2154(4-alpha-hydroxytetrahydrobiopterin dehydratase activity)	PF01329.19(Pterin_4a:Pterin 4 alpha carbinolamine dehydratase)	sp|O42658|PHS_SCHPO(Pterin-4-alpha-carbinolamine dehydratase OS=Schizosaccharomyces pombe (strain 972 / ATCC 24843) OX=284812 GN=omt2 PE=3 SV=1)
136025	estExt_fgenesh1_pm.C_2_t20099	putative 2-heptaprenyl-1%2C4-naphthoquinone methyltransferase	948	1.99443	Up	7.23082e-89	ENOG4111IQH(S:Function unknown)	ENOG4111IQH(Methyltransferase)	PF08241.12(Methyltransf_11:Methyltransferase domain); PF13649.6(Methyltransf_25:Methyltransferase domain); PF08242.12(Methyltransf_12:Methyltransferase domain); PF13847.6(Methyltransf_31:Methyltransferase domain); PF13489.6(Methyltransf_23:Methyltransferase domain); PF01209.18(Ubie_methyltran:ubiE/COQ5 methyltransferase family)	sp|Q9UTA8|YL8A_SCHPO(Uncharacterized methyltransferase-like C25B8.10 OS=Schizosaccharomyces pombe (strain 972 / ATCC 24843) OX=284812 GN=SPAC25B8.10 PE=3 SV=1)
33253	fgenesh1_pg.3_#_131	hypothetical protein	2526	1.99421	Up	3.38902e-46	ENOG410XTCF(S:Function unknown)	ENOG410XTCF(Conserved hypothetical, protein)	PF11885.8(DUF3405:Protein of unknown function (DUF3405))
133389	fgenesh1_pm.24_#_10	Dehydroquinate synthase-like protein	1074	1.99272	Up	7.74544e-07	COG1454(C:Energy production and conversion)	COG1454(alcohol dehydrogenase)	PF00465.19(Fe-ADH:Iron-containing alcohol dehydrogenase); PF13685.6(Fe-ADH_2:Iron-containing alcohol dehydrogenase)	sp|Q45072|TFTE_BURCE(Maleylacetate reductase OS=Burkholderia cepacia OX=292 GN=tftE PE=3 SV=1)
138931	estExt_fgenesh1_pm.C_250119	hypothetical protein	3153	1.99206	Up	0	COG0674(C:Energy production and conversion)	COG0674(Oxidoreductase required for the transfer of electrons from pyruvate to flavodoxin (By similarity))	PF00667.20(FAD_binding_1:FAD binding domain); PF00175.21(NAD_binding_1:Oxidoreductase NAD-binding domain); PF17147.4(PFOR_II:Pyruvate:ferredoxin oxidoreductase core domain II); PF01558.18(POR:Pyruvate ferredoxin/flavodoxin oxidoreductase); PF02780.20(Transketolase_C:Transketolase, C-terminal domain)	sp|P39692|MET10_YEAST(Sulfite reductase [NADPH] flavoprotein component OS=Saccharomyces cerevisiae (strain ATCC 204508 / S288c) OX=559292 GN=MET10 PE=1 SV=2)
96129	estExt_Genewise1Plus.C_3_t10128	P-loop containing nucleoside triphosphate hydrolase protein	6003	1.99196	Up	1.16893e-30	COG1112(S:Function unknown)	COG1112(Conserved hypothetical, protein)	PF13087.6(AAA_12:AAA domain); PF13086.6(AAA_11:AAA domain); PF13245.6(AAA_19:AAA domain); PF00642.24(zf-CCCH:Zinc finger C-x8-C-x5-C-x3-H type (and similar)); PF13604.6(AAA_30:AAA domain); PF18345.1(zf_CCCH_4:Zinc finger domain); PF18044.1(zf-CCCH_4:CCCH-type zinc finger)	sp|Q9P2E3|ZNFX1_HUMAN(NFX1-type zinc finger-containing protein 1 OS=Homo sapiens OX=9606 GN=ZNFX1 PE=2 SV=2)
37746	fgenesh1_pg.19_#_71	alpha/beta-Hydrolase	1218	1.99055	Up	1.15965e-87	COG0596(S:Function unknown)	COG0596(-)	PF06441.12(EHN:Epoxide hydrolase N terminus); PF00561.20(Abhydrolase_1:alpha/beta hydrolase fold); PF12697.7(Abhydrolase_6:Alpha/beta hydrolase family)	sp|Q06816|HYEP_STIAD(Putative epoxide hydrolase OS=Stigmatella aurantiaca (strain DW4/3-1) OX=378806 GN=STAUR_4299 PE=3 SV=2)
74394	e_gw1.4.709.1	hypothetical protein	4575	1.99035	Up	7.95184e-14	COG0533(O:Posttranslational modification, protein turnover, chaperones); ENOG410YA1J(S:Function unknown)	COG0533(Required for the formation of a threonylcarbamoyl group on adenosine at position 37 (t(6)A37) in tRNAs that read codons beginning with adenine (By similarity)); ENOG410YA1J(Conserved hypothetical, protein)	PF00814.25(Peptidase_M22:Glycoprotease family)	sp|O94710|QRI7_SCHPO(tRNA N6-adenosine threonylcarbamoyltransferase, mitochondrial OS=Schizosaccharomyces pombe (strain 972 / ATCC 24843) OX=284812 GN=pgp1 PE=3 SV=1)
76250	e_gw1.5.643.1	hypothetical protein	2172	1.98558	Up	7.56368e-15	ENOG410YCR4(K:Transcription)	ENOG410YCR4(Fungal_trans)	PF04082.18(Fungal_trans:Fungal specific transcription factor domain); PF00172.18(Zn_clus:Fungal Zn(2)-Cys(6) binuclear cluster domain)	sp|P08657|LAC9_KLULA(Lactose regulatory protein LAC9 OS=Kluyveromyces lactis (strain ATCC 8585 / CBS 2359 / DSM 70799 / NBRC 1267 / NRRL Y-1140 / WM37) OX=284590 GN=LAC9 PE=1 SV=1)
129436	fgenesh1_pm.7_#_109	hypothetical protein	2205	1.98238	Up	2.53948e-09	COG1341(S:Function unknown)	COG1341(Nucleolar protein 9)	PF16575.5(CLP1_P:mRNA cleavage and polyadenylation factor CLP1 P-loop)	sp|Q4IR18|GRC3_GIBZE(Polynucleotide 5'-hydroxyl-kinase GRC3 OS=Gibberella zeae (strain PH-1 / ATCC MYA-4620 / FGSC 9075 / NRRL 31084) OX=229533 GN=GRC3 PE=3 SV=2)
93482	e_gw1.53.1.1	3-hydroxyanthranilate 3%2C4-dioxygenase	576	1.98103	Up	3.65206e-22	ENOG4111GH8(H:Coenzyme transport and metabolism)	ENOG4111GH8(Catalyzes the oxidative ring opening of 3- hydroxyanthranilate to 2-amino-3-carboxymuconate semialdehyde, which spontaneously cyclizes to quinolinate (By similarity))	PF06052.12(3-HAO:3-hydroxyanthranilic acid dioxygenase); PF07883.11(Cupin_2:Cupin domain); PF02311.19(AraC_binding:AraC-like ligand binding domain)	sp|A4REV8|3HAO_MAGO7(3-hydroxyanthranilate 3,4-dioxygenase OS=Magnaporthe oryzae (strain 70-15 / ATCC MYA-4617 / FGSC 8958) OX=242507 GN=BNA1 PE=3 SV=1)
39977	fgenesh1_pg.52_#_11	hypothetical protein	2172	1.98089	Up	0.000421316	ENOG410ZA6P(S:Function unknown)	ENOG410ZA6P(Transcription factor)	PF04082.18(Fungal_trans:Fungal specific transcription factor domain); PF00172.18(Zn_clus:Fungal Zn(2)-Cys(6) binuclear cluster domain)	sp|Q59LV8|ASG1_CANAL(Activator of stress genes protein 1 OS=Candida albicans (strain SC5314 / ATCC MYA-2876) OX=237561 GN=ASG1 PE=3 SV=2)
126327	fgenesh1_pm.1_#_741	NAD(P)-binding protein	960	1.98071	Up	0	COG0702(S:Function unknown)	COG0702(Conserved hypothetical, protein)	PF05368.13(NmrA:NmrA-like family); PF13460.6(NAD_binding_10:NAD(P)H-binding)	sp|P39315|QOR2_ECOLI(Quinone oxidoreductase 2 OS=Escherichia coli (strain K12) OX=83333 GN=qorB PE=1 SV=1)
54688	gw1.14.366.1	hypothetical protein	2442	1.97938	Up	6.01722e-21	ENOG410YPNM(O:Posttranslational modification, protein turnover, chaperones)	ENOG410YPNM(Baculoviral IAP repeat containing)	PF00653.21(BIR:Inhibitor of Apoptosis domain)	sp|O14064|BIR1_SCHPO(Protein bir1 OS=Schizosaccharomyces pombe (strain 972 / ATCC 24843) OX=284812 GN=bir1 PE=1 SV=1)
100837	estExt_Genewise1Plus.C_13_t10407	glycosyl hydrolase	2501	1.9783	Up	2.97142e-07	COG5498(S:Function unknown)	COG5498(Small nucleolar)	PF17652.1(Glyco_hydro81C:Glycosyl hydrolase family 81 C-terminal domain); PF03639.13(Glyco_hydro_81:Glycosyl hydrolase family 81 N-terminal domain)	sp|D4AZ24|ENG1_ARTBC(Probable endo-1,3(4)-beta-glucanase ARB_01444 OS=Arthroderma benhamiae (strain ATCC MYA-4681 / CBS 112371) OX=663331 GN=ARB_01444 PE=1 SV=1)
70168	e_gw1.1.2571.1	CHL4-domain containing protein	1521	1.97816	Up	5.7593e-11	ENOG4111VIM(S:Function unknown)	ENOG4111VIM(CHL4 family chromosome segregation protein)	PF05238.13(CENP-N:Kinetochore protein CHL4 like)	sp|P38907|CENPN_YEAST(Inner kinetochore subunit CHL4 OS=Saccharomyces cerevisiae (strain ATCC 204508 / S288c) OX=559292 GN=CHL4 PE=1 SV=1)
123895	estExt_fgenesh2_kg.C_130058	expressed protein	697	1.97561	Up	6.39016e-96
122251	estExt_fgenesh2_kg.C_20384	small heat shock protein	832	1.97434	Up	0	ENOG4111YTA(O:Posttranslational modification, protein turnover, chaperones)	ENOG4111YTA(Heat shock protein)	PF00011.21(HSP20:Hsp20/alpha crystallin family); PF17886.1(ArsA_HSP20:HSP20-like domain found in ArsA)	sp|P19752|HSP30_NEUCR(30 kDa heat shock protein OS=Neurospora crassa (strain ATCC 24698 / 74-OR23-1A / CBS 708.71 / DSM 1257 / FGSC 987) OX=367110 GN=hsp30 PE=3 SV=1)
84248	e_gw1.15.4.1	P-loop containing nucleoside triphosphate hydrolase protein	4380	1.97379	Up	9.4586e-40	COG1132(K:Transcription)	COG1132(Transcription factor)	PF00005.27(ABC_tran:ABC transporter); PF00664.23(ABC_membrane:ABC transporter transmembrane region); PF02463.19(SMC_N:RecF/RecN/SMC N terminal domain); PF13555.6(AAA_29:P-loop containing region of AAA domain); PF13476.6(AAA_23:AAA domain); PF02492.19(cobW:CobW/HypB/UreG, nucleotide-binding domain)	sp|Q4WT65|ABCB_ASPFU(ABC multidrug transporter B OS=Neosartorya fumigata (strain ATCC MYA-4609 / Af293 / CBS 101355 / FGSC A1100) OX=330879 GN=abcB PE=2 SV=2)
78691	e_gw1.8.366.1	hypothetical protein	2469	1.97338	Up	1.95987e-80	ENOG410XR3W(K:Transcription)	ENOG410XR3W(Transcription factor)	PF04082.18(Fungal_trans:Fungal specific transcription factor domain); PF00172.18(Zn_clus:Fungal Zn(2)-Cys(6) binuclear cluster domain)	sp|O14130|YF54_SCHPO(Uncharacterized transcriptional regulatory protein C3C7.04 OS=Schizosaccharomyces pombe (strain 972 / ATCC 24843) OX=284812 GN=SPAC3C7.04 PE=3 SV=1)
75975	e_gw1.5.188.1	hypothetical protein	1329	1.97336	Up	5.9212e-05	ENOG4110XIE(S:Function unknown)	ENOG4110XIE(CFEM domain)	PF05730.11(CFEM:CFEM domain)	sp|A0A084B9Z2|SAT4_STACB(Satratoxin biosynthesis SC1 cluster protein 4 OS=Stachybotrys chartarum (strain CBS 109288 / IBT 7711) OX=1280523 GN=SAT4 PE=3 SV=1)
36257	fgenesh1_pg.11_#_227	cystathionine gamma-lyase	1248	1.97251	Up	1.56219e-37	COG0626(S:Function unknown)	COG0626(-)	PF01053.20(Cys_Met_Meta_PP:Cys/Met metabolism PLP-dependent enzyme); PF00266.19(Aminotran_5:Aminotransferase class-V); PF00155.21(Aminotran_1_2:Aminotransferase class I and II); PF01041.17(DegT_DnrJ_EryC1:DegT/DnrJ/EryC1/StrS aminotransferase family)	sp|P31373|CYS3_YEAST(Cystathionine gamma-lyase OS=Saccharomyces cerevisiae (strain ATCC 204508 / S288c) OX=559292 GN=CYS3 PE=1 SV=2)
72079	e_gw1.2.2064.1	mitochondrial escape protein 2	2625	1.97215	Up	2.44142e-139	ENOG410XQS2(A:RNA processing and modification)	ENOG410XQS2(Plays a role in maintaining the mitochondrial genome and in controlling the mtDNA escape. Involved in the regulation of mtDNA nucleotide structure and number. May have a dispensable role in early maturation of pre-rRNA (By similarity))	PF10443.9(RNA12:RNA12 protein); PF01637.18(ATPase_2:ATPase domain predominantly from Archaea); PF00076.22(RRM_1:RNA recognition motif. (a.k.a. RRM, RBD, or RNP domain))	sp|A4R1D5|YME2_MAGO7(Mitochondrial escape protein 2 OS=Magnaporthe oryzae (strain 70-15 / ATCC MYA-4617 / FGSC 8958) OX=242507 GN=YME2 PE=3 SV=2)
24446	estExt_Genemark1.C_60005	hypothetical protein	964	1.9712	Up	1.30644e-25	COG1409(S:Function unknown)	COG1409(Hydrolyzes cAMP to 5'-AMP. Plays an important regulatory role in modulating the intracellular concentration of cAMP, thereby influencing cAMP-dependent processes (By similarity))	PF00149.28(Metallophos:Calcineurin-like phosphoesterase); PF12850.7(Metallophos_2:Calcineurin-like phosphoesterase superfamily domain)
85352	e_gw1.17.400.1	Microcystin LR degradation protein MlrC	1533	1.97018	Up	4.74858e-07	COG5476(S:Function unknown)	COG5476(microcystin LR degradation protein MlrC-like protein)	PF07364.12(DUF1485:Metallopeptidase family M81); PF07171.12(MlrC_C:MlrC C-terminus)	sp|Q93CA6|MLRC_SPHSX(Microcystinase C (Fragment) OS=Sphingomonas sp. OX=28214 GN=mlrC PE=3 SV=1)
72607	e_gw1.3.45.1	mating-type switching protein swi10	1209	1.96988	Up	3.24048e-06	COG5241(L:Replication, recombination and repair)	COG5241(Excision repair cross-complementing rodent repair deficiency, complementation group 1 (Includes overlapping antisense sequence))	PF03834.14(Rad10:Binding domain of DNA repair protein Ercc1 (rad10/Swi10))	sp|Q06182|SWI10_SCHPO(Mating-type switching protein swi10 OS=Schizosaccharomyces pombe (strain 972 / ATCC 24843) OX=284812 GN=swi10 PE=1 SV=1)
60579	gw1.7.933.1	hypothetical protein	1110	1.96906	Up	2.58356e-35	ENOG410YPZ9(S:Function unknown)	ENOG410YPZ9(-)
90358	e_gw1.28.232.1	hypothetical protein	1260	1.96857	Up	3.24048e-06	ENOG410XQTM(S:Function unknown)	ENOG410XQTM(Protein of unknown function (DUF2855))	PF11017.8(DUF2855:Protein of unknown function (DUF2855))
131934	fgenesh1_pm.16_#_36	putative acetate-CoA ligase	2109	1.96748	Up	1.52111e-38	COG0365(S:Function unknown)	COG0365(Conserved hypothetical, protein)	PF00501.28(AMP-binding:AMP-binding enzyme); PF16177.5(ACAS_N:Acetyl-coenzyme A synthetase N-terminus); PF13193.6(AMP-binding_C:AMP-binding enzyme C-terminal domain)	sp|P28812|Y3568_PSEAE(Uncharacterized protein PA3568 OS=Pseudomonas aeruginosa (strain ATCC 15692 / DSM 22644 / CIP 104116 / JCM 14847 / LMG 12228 / 1C / PRS 101 / PAO1) OX=208964 GN=PA3568 PE=3 SV=2)
5232	gm1.788_g	COP9 signalosome subunit 7	840	1.96683	Up	4.88544e-14	ENOG410XP7W(O:Posttranslational modification, protein turnover, chaperones)	ENOG410XP7W(COP9 (constitutive photomorphogenic) homolog, subunit)	PF01399.27(PCI:PCI domain)	sp|Q7SGS1|CSN7A_NEUCR(COP9 signalosome complex subunit 7a OS=Neurospora crassa (strain ATCC 24698 / 74-OR23-1A / CBS 708.71 / DSM 1257 / FGSC 987) OX=367110 GN=csn-7a PE=1 SV=1)
5606	gm1.1162_g	hypothetical protein	2364	1.96617	Up	1.2506e-13	ENOG410Y9SG(S:Function unknown)	ENOG410Y9SG(Methyltransferase domain)	PF04082.18(Fungal_trans:Fungal specific transcription factor domain); PF00172.18(Zn_clus:Fungal Zn(2)-Cys(6) binuclear cluster domain)	sp|I1RF57|AURR2_GIBZE(Aurofusarin cluster transcription factor aurR2 OS=Gibberella zeae (strain PH-1 / ATCC MYA-4620 / FGSC 9075 / NRRL 31084) OX=229533 GN=aurR2 PE=2 SV=1)
79323	e_gw1.8.493.1	NAD(P)-binding protein	909	1.96536	Up	2.23888e-05	COG1028(S:Function unknown)	COG1028(-)	PF13561.6(adh_short_C2:Enoyl-(Acyl carrier protein) reductase); PF00106.25(adh_short:short chain dehydrogenase); PF08659.10(KR:KR domain)	sp|Q9LBG2|LVR_LEIAQ(Levodione reductase OS=Leifsonia aquatica OX=144185 GN=lvr PE=1 SV=1)
32057	fgenesh1_pg.1_#_546	major facilitator superfamily transporter	1794	1.96443	Up	9.1628e-11	COG0477(S:Function unknown)	COG0477(BTB POZ domain containing)	PF07690.16(MFS_1:Major Facilitator Superfamily); PF13347.6(MFS_2:MFS/sugar transport protein)	sp|Q59XM0|QDR3_CANAL(MFS antiporter QDR3 OS=Candida albicans (strain SC5314 / ATCC MYA-2876) OX=237561 GN=QDR3 PE=2 SV=2)
138312	estExt_fgenesh1_pm.C_170118	aminotransferase class I and II	1337	1.96438	Up	5.9212e-05	COG0156(H:Coenzyme transport and metabolism)	COG0156(Catalyzes a mechanistically unusual reaction, the ATP- dependent insertion of CO2 between the N7 and N8 nitrogen atoms of 7,8-diaminopelargonic acid (DAPA) to form an ureido ring (By similarity))	PF00155.21(Aminotran_1_2:Aminotransferase class I and II)	sp|Q0T6I4|BIOF_SHIF8(8-amino-7-oxononanoate synthase OS=Shigella flexneri serotype 5b (strain 8401) OX=373384 GN=bioF PE=3 SV=1)
12057	gm1.7613_g	flavo protein	735	1.96333	Up	1.82435e-07	COG0452(S:Function unknown)	COG0452(amidohydrolase)	PF02441.19(Flavoprotein:Flavoprotein)	sp|Q9UTI7|TYSY_SCHPO(Probable thymidylate synthase OS=Schizosaccharomyces pombe (strain 972 / ATCC 24843) OX=284812 GN=SPAC15E1.04 PE=3 SV=1)
9128	gm1.4684_g	hypothetical protein	528	1.95817	Up	4.26322e-17	ENOG410ZQV3(S:Function unknown)	ENOG410ZQV3(-)
73650	e_gw1.3.977.1	SET domain-containing protein	1383	1.95479	Up	7.09122e-16	ENOG410Y7DR(S:Function unknown)	ENOG410Y7DR(ribonuclease T2 activity)	PF09273.11(Rubis-subs-bind:Rubisco LSMT substrate-binding); PF00856.28(SET:SET domain); PF01753.18(zf-MYND:MYND finger)	sp|C1FXW2|SETD3_DASNO(Actin-histidine N-methyltransferase OS=Dasypus novemcinctus OX=9361 GN=SETD3 PE=3 SV=1)
127386	fgenesh1_pm.2_#_711	hypothetical protein	1314	1.95329	Up	5.84436e-39	COG0476(U:Intracellular trafficking, secretion, and vesicular transport)	COG0476(nucleoporin 214kDa)	PF00899.21(ThiF:ThiF family); PF08825.10(E2_bind:E2 binding domain); PF14732.6(UAE_UbL:Ubiquitin/SUMO-activating enzyme ubiquitin-like domain)	sp|Q8TBC4|UBA3_HUMAN(NEDD8-activating enzyme E1 catalytic subunit OS=Homo sapiens OX=9606 GN=UBA3 PE=1 SV=2)
77987	e_gw1.7.13.1	hypothetical protein	1335	1.95101	Up	3.02706e-14	ENOG410Z879(S:Function unknown)	ENOG410Z879(-)
86253	e_gw1.18.325.1	hypothetical protein	1668	1.94909	Up	6.43148e-09	ENOG410YJCU(S:Function unknown)	ENOG410YJCU(-)
75458	e_gw1.5.579.1	PFU-domain containing protein	2322	1.94782	Up	7.82652e-146	ENOG410XS67(S:Function unknown)	ENOG410XS67(Phospholipase A2-activating protein)	PF08324.11(PUL:PUL domain); PF09070.11(PFU:PFU (PLAA family ubiquitin binding)); PF00400.32(WD40:WD domain, G-beta repeat)	sp|O94289|LUB1_SCHPO(Ubiquitin homeostasis protein lub1 OS=Schizosaccharomyces pombe (strain 972 / ATCC 24843) OX=284812 GN=lub1 PE=1 SV=2)
141796	estExt_fgenesh1_pg.C_120082	MFS general substrate transporter	1895	1.94766	Up	1.74763e-82	ENOG410XSE0(S:Function unknown)	ENOG410XSE0(-)	PF07690.16(MFS_1:Major Facilitator Superfamily); PF00083.24(Sugar_tr:Sugar (and other) transporter); PF06609.13(TRI12:Fungal trichothecene efflux pump (TRI12))	sp|Q4WRQ4|MFSB_ASPFU(Major facilitator superfamily multidrug transporter mfsB OS=Neosartorya fumigata (strain ATCC MYA-4609 / Af293 / CBS 101355 / FGSC A1100) OX=330879 GN=mfsB PE=2 SV=1)
57274	gw1.22.293.1	hypothetical protein	867	1.94753	Up	1.66334e-08	ENOG410YKJQ(S:Function unknown)	ENOG410YKJQ(-)
76649	e_gw1.6.327.1	hypothetical protein	2025	1.94708	Up	2.49006e-09	ENOG410YDYK(S:Function unknown); ENOG4110H53(S:Function unknown); ENOG410XQCI(K:Transcription)	ENOG410YDYK(Transcription factor); ENOG4110H53(-); ENOG410XQCI(Transcription factor)	PF04082.18(Fungal_trans:Fungal specific transcription factor domain); PF00172.18(Zn_clus:Fungal Zn(2)-Cys(6) binuclear cluster domain)
7422	gm1.2978_g	MFS general substrate transporter	1509	1.94596	Up	4.30804e-08	ENOG410ZVN7(G:Carbohydrate transport and metabolism)	ENOG410ZVN7(phosphate transporter)	PF00083.24(Sugar_tr:Sugar (and other) transporter); PF07690.16(MFS_1:Major Facilitator Superfamily)	sp|Q59Q30|GIT1_CANAL(Glycerophosphoinositol permease 1 OS=Candida albicans (strain SC5314 / ATCC MYA-2876) OX=237561 GN=GIT1 PE=1 SV=1)
95529	estExt_Genewise1Plus.C_2_t20478	hypothetical protein	1536	1.94476	Up	3.68696e-38	ENOG4111Q4M(S:Function unknown)	ENOG4111Q4M(Diacylglycerol kinase catalytic domain)	PF00781.24(DAGK_cat:Diacylglycerol kinase catalytic domain)
68160	e_gw1.1.955.1	aldo/keto reductase	1140	1.94436	Up	8.37128e-43	COG0667(C:Energy production and conversion)	COG0667(Aldo keto reductase)	PF00248.21(Aldo_ket_red:Aldo/keto reductase family)	sp|M2YJQ2|NORB_DOTSN(Norsolorinic acid reductase B OS=Dothistroma septosporum (strain NZE10 / CBS 128990) OX=675120 GN=norB PE=2 SV=1)
90536	e_gw1.29.276.1	hypothetical protein	1425	1.94142	Up	1.013e-56	COG0277(S:Function unknown)	COG0277(adenosine deaminase)	PF02913.19(FAD-oxidase_C:FAD linked oxidases, C-terminal domain); PF01565.23(FAD_binding_4:FAD binding domain)	sp|Q12627|DLD1_KLULA(D-lactate dehydrogenase [cytochrome], mitochondrial OS=Kluyveromyces lactis (strain ATCC 8585 / CBS 2359 / DSM 70799 / NBRC 1267 / NRRL Y-1140 / WM37) OX=284590 GN=DLD1 PE=3 SV=2)
75497	e_gw1.5.274.1	hypothetical protein	2136	1.94035	Up	4.79168e-14	ENOG410YA96(K:Transcription)	ENOG410YA96(Transcription factor)	PF04082.18(Fungal_trans:Fungal specific transcription factor domain)	sp|P87000|ACU15_NEUCR(Transcriptional activator protein acu-15 OS=Neurospora crassa (strain ATCC 24698 / 74-OR23-1A / CBS 708.71 / DSM 1257 / FGSC 987) OX=367110 GN=acu-15 PE=1 SV=2)
87783	e_gw1.22.208.1	hypothetical protein	2055	1.93901	Up	1.35723e-11	ENOG4111VRF(S:Function unknown)	ENOG4111VRF(-)
88681	e_gw1.24.242.1	hypothetical protein	459	1.93901	Up	6.9445e-16	ENOG4112507(S:Function unknown)	ENOG4112507(Polyketide cyclase / dehydrase and lipid transport)	PF10604.9(Polyketide_cyc2:Polyketide cyclase / dehydrase and lipid transport)
10972	gm1.6528_g	family 57 glycosyltransferase	1725	1.93519	Up	3.13948e-70	ENOG410XQK1(S:Function unknown)	ENOG410XQK1(asparagine-linked glycosylation 6, alpha-1,3-glucosyltransferase homolog (S. cerevisiae))	PF03155.15(Alg6_Alg8:ALG6, ALG8 glycosyltransferase family)	sp|O43053|ALG6_SCHPO(Probable dolichyl pyrophosphate Man9GlcNAc2 alpha-1,3-glucosyltransferase OS=Schizosaccharomyces pombe (strain 972 / ATCC 24843) OX=284812 GN=alg6 PE=3 SV=1)
139530	estExt_fgenesh1_pm.C_450021	hypothetical protein	802	1.93424	Up	1.15795e-14	ENOG4110WEU(S:Function unknown); ENOG4111TAM(S:Function unknown)	ENOG4110WEU(Chromosome segregation protein Csm1/Pcs1); ENOG4111TAM(chromosome segregation protein pcs1)	PF12539.8(Csm1:Chromosome segregation protein Csm1/Pcs1); PF08317.11(Spc7:Spc7 kinetochore protein); PF12325.8(TMF_TATA_bd:TATA element modulatory factor 1 TATA binding)	sp|O13684|PCS1_SCHPO(Monopolin complex subunit pcs1 OS=Schizosaccharomyces pombe (strain 972 / ATCC 24843) OX=284812 GN=pcs1 PE=1 SV=4)
129490	fgenesh1_pm.7_#_163	calcofluor white hypersensitive protein	2886	1.93417	Up	6.4992e-190	ENOG410XT2T(S:Function unknown)	ENOG410XT2T(Post-GPI attachment to proteins)	PF10277.9(Frag1:Frag1/DRAM/Sfk1 family)	sp|Q9HDZ2|CWH43_SCHPO(Protein cwh43 OS=Schizosaccharomyces pombe (strain 972 / ATCC 24843) OX=284812 GN=cwh43 PE=2 SV=2)
77948	e_gw1.7.111.1	hypothetical protein	1203	1.93345	Up	5.16894e-06	ENOG4111MMJ(S:Function unknown)	ENOG4111MMJ(WD repeat domain 85)		sp|O74865|DPH7_SCHPO(Diphthine methyltransferase OS=Schizosaccharomyces pombe (strain 972 / ATCC 24843) OX=284812 GN=rrt2 PE=3 SV=2)
101266	estExt_Genewise1Plus.C_14_t20084	DUF255 domain protein	2383	1.93206	Up	3.15324e-69	COG1331(O:Posttranslational modification, protein turnover, chaperones)	COG1331(mannose-6-phosphate isomerase activity)	PF03190.15(Thioredox_DsbH:Protein of unknown function, DUF255)	sp|Q09214|YP65_CAEEL(Uncharacterized protein B0495.5 OS=Caenorhabditis elegans OX=6239 GN=B0495.5 PE=4 SV=2)
77836	e_gw1.7.568.1	ATP-dependent DNA ligase	2646	1.93161	Up	8.96022e-11	COG1793(T:Signal transduction mechanisms)	COG1793(Bola-like protein)	PF01068.21(DNA_ligase_A_M:ATP dependent DNA ligase domain); PF04675.14(DNA_ligase_A_N:DNA ligase N terminus); PF04679.15(DNA_ligase_A_C:ATP dependent DNA ligase C terminal region); PF09414.10(RNA_ligase:RNA ligase)	sp|Q9C1W9|DNLI3_SCHPO(DNA ligase 3 OS=Schizosaccharomyces pombe (strain 972 / ATCC 24843) OX=284812 GN=adl1 PE=3 SV=1)
107938	estExt_Genewise1.C_3_t20019	hypothetical protein	1326	1.92897	Up	3.03638e-26	ENOG410XPDE(O:Posttranslational modification, protein turnover, chaperones)	ENOG410XPDE(protein deneddylation)	PF01399.27(PCI:PCI domain)	sp|Q7S0P8|CSN4_NEUCR(COP9 signalosome complex subunit 4 OS=Neurospora crassa (strain ATCC 24698 / 74-OR23-1A / CBS 708.71 / DSM 1257 / FGSC 987) OX=367110 GN=csn-4 PE=1 SV=1)
104475	estExt_Genewise1Plus.C_330068	hypothetical protein	2633	1.92694	Up	2.63788e-08	ENOG410Y987(S:Function unknown)	ENOG410Y987(-)
135928	estExt_fgenesh1_pm.C_2_t10418	STE-domain containing protein	2124	1.92678	Up	1.39633e-21	COG5048(S:Function unknown)	COG5048(C6 finger domain protein)	PF02200.16(STE:STE like transcription factor); PF00096.26(zf-C2H2:Zinc finger, C2H2 type); PF13894.6(zf-C2H2_4:C2H2-type zinc finger); PF13465.6(zf-H2C2_2:Zinc-finger double domain); PF12171.8(zf-C2H2_jaz:Zinc-finger double-stranded RNA-binding)	sp|O74252|STE12_EMENI(Transcription factor steA OS=Emericella nidulans (strain FGSC A4 / ATCC 38163 / CBS 112.46 / NRRL 194 / M139) OX=227321 GN=steA PE=2 SV=1)
136620	estExt_fgenesh1_pm.C_50227	hypothetical protein	2511	1.926	Up	2.07132e-23	ENOG410YI53(S:Function unknown)	ENOG410YI53(-)	PF14611.6(SLS:Mitochondrial inner-membrane-bound regulator)
84640	e_gw1.16.543.1	glutathione S-transferase	1020	1.9253	Up	2.63788e-08	ENOG410XQW2(O:Posttranslational modification, protein turnover, chaperones)	ENOG410XQW2(glutathione)	PF00043.25(GST_C:Glutathione S-transferase, C-terminal domain); PF13417.6(GST_N_3:Glutathione S-transferase, N-terminal domain); PF13410.6(GST_C_2:Glutathione S-transferase, C-terminal domain)
53831	gw1.3.825.1	hypothetical protein	597	1.92512	Up	0.000252238	ENOG410YH64(S:Function unknown)	ENOG410YH64(Conserved hypothetical, protein)
116618	estExt_Genewise1.C_410090	Tubulin nucleotide-binding domain-like protein	1582	1.92372	Up	7.15022e-15	ENOG410XPM0(S:Function unknown)	ENOG410XPM0(Misato homolog 1 (Drosophila))	PF14881.6(Tubulin_3:Tubulin domain); PF10644.9(Misat_Tub_SegII:Misato Segment II tubulin-like domain); PF00091.25(Tubulin:Tubulin/FtsZ family, GTPase domain)	sp|Q4IBL8|DML1_GIBZE(Protein DML1 OS=Gibberella zeae (strain PH-1 / ATCC MYA-4620 / FGSC 9075 / NRRL 31084) OX=229533 GN=DML1 PE=3 SV=1)
76260	e_gw1.6.1060.1	tRNA delta-isopentenylpyrophosphate transferase family protein	1368	1.92351	Up	1.33808e-22	COG0324(J:Translation, ribosomal structure and biogenesis)	COG0324(Catalyzes the transfer of a dimethylallyl group onto the adenine at position 37 in tRNAs that read codons beginning with uridine, leading to the formation of N6-(dimethylallyl)adenosine (i(6)A) (By similarity))	PF01715.17(IPPT:IPP transferase); PF12171.8(zf-C2H2_jaz:Zinc-finger double-stranded RNA-binding); PF01745.16(IPT:Isopentenyl transferase); PF12874.7(zf-met:Zinc-finger of C2H2 type); PF13671.6(AAA_33:AAA domain)	sp|Q9UT75|MOD5_SCHPO(tRNA dimethylallyltransferase OS=Schizosaccharomyces pombe (strain 972 / ATCC 24843) OX=284812 GN=tit1 PE=3 SV=1)
76606	e_gw1.6.526.1	2-nitropropane dioxygenase	978	1.92299	Up	0.000252238	COG2070(S:Function unknown)	COG2070(2-Nitropropane dioxygenase)	PF03060.15(NMO:Nitronate monooxygenase); PF00478.25(IMPDH:IMP dehydrogenase / GMP reductase domain); PF01070.18(FMN_dh:FMN-dependent dehydrogenase)	sp|O06179|Y1533_MYCTU(Putative monooxygenase Rv1533 OS=Mycobacterium tuberculosis (strain ATCC 25618 / H37Rv) OX=83332 GN=Rv1533 PE=1 SV=1)
60566	gw1.9.683.1	putative NIMA interactive protein	1035	1.92166	Up	5.51108e-11	ENOG410XRC4(S:Function unknown)	ENOG410XRC4(NIMA interactive protein)	PF11559.8(ADIP:Afadin- and alpha -actinin-Binding)
123057	estExt_fgenesh2_kg.C_70091	NMT-1 like protein	1264	1.92045	Up	0	COG0715(P:Inorganic ion transport and metabolism)	COG0715((ABC) transporter)	PF09084.11(NMT1:NMT1/THI5 like)	sp|P42882|NMT1_ASPPA(4-amino-5-hydroxymethyl-2-methylpyrimidine phosphate synthase OS=Aspergillus parasiticus OX=5067 GN=nmt1 PE=2 SV=1)
109760	estExt_Genewise1.C_6_t30246	putative mitochondrial fusion protein	1848	1.91907	Up	1.18308e-127	ENOG4110UN2(S:Function unknown)	ENOG4110UN2(Mitochondrial fusion and transport protein Ugo1)	PF00153.27(Mito_carr:Mitochondrial carrier protein)	sp|Q03327|UGO1_YEAST(Mitochondrial fusion and transport protein UGO1 OS=Saccharomyces cerevisiae (strain ATCC 204508 / S288c) OX=559292 GN=UGO1 PE=1 SV=3)
71937	e_gw1.2.579.1	hypothetical protein	1977	1.91226	Up	4.33182e-47	ENOG410Y9MH(S:Function unknown)	ENOG410Y9MH(-)
143068	estExt_fgenesh1_pg.C_300090	CRAL/TRIO domain-containing protein	1736	1.91123	Up	3.17914e-287	ENOG410XRSQ(S:Function unknown)	ENOG410XRSQ(Magnesium-dependent phosphatase)	PF00650.20(CRAL_TRIO:CRAL/TRIO domain); PF03765.15(CRAL_TRIO_N:CRAL/TRIO, N-terminal domain)	sp|P24280|SEC14_YEAST(SEC14 cytosolic factor OS=Saccharomyces cerevisiae (strain ATCC 204508 / S288c) OX=559292 GN=SEC14 PE=1 SV=3)
33909	fgenesh1_pg.4_#_256	Acyl-CoA N-acyltransferase	672	1.90782	Up	1.0651e-15	ENOG410YXC2(S:Function unknown); ENOG410YJW4(S:Function unknown)	ENOG410YXC2(Acetyltransferase (GNAT) family); ENOG410YJW4(Acetyltransferase (GNAT) family)	PF00583.25(Acetyltransf_1:Acetyltransferase (GNAT) family); PF13673.7(Acetyltransf_10:Acetyltransferase (GNAT) domain); PF13508.7(Acetyltransf_7:Acetyltransferase (GNAT) domain); PF13527.7(Acetyltransf_9:Acetyltransferase (GNAT) domain)	sp|P13249|PUAC_STRAD(Puromycin N-acetyltransferase OS=Streptomyces alboniger OX=132473 GN=pac PE=4 SV=2)
128332	fgenesh1_pm.4_#_329	hypothetical protein	1341	1.9073	Up	1.96366e-40	ENOG410YDMI(S:Function unknown)	ENOG410YDMI(Conserved hypothetical, protein)
141801	estExt_fgenesh1_pg.C_120088	DUF726-domain containing protein	2596	1.90596	Up	2.39358e-18	ENOG410YB1Z(S:Function unknown)	ENOG410YB1Z(-)	PF05277.12(DUF726:Protein of unknown function (DUF726)); PF00975.20(Thioesterase:Thioesterase domain)	sp|Q9US10|YK68_SCHPO(Uncharacterized membrane protein C6F6.13c OS=Schizosaccharomyces pombe (strain 972 / ATCC 24843) OX=284812 GN=SPAC607.08c PE=3 SV=1)
96318	estExt_Genewise1Plus.C_3_t20006	hypothetical protein	3342	1.9034	Up	5.76494e-77	ENOG410XQ0U(S:Function unknown)	ENOG410XQ0U(SNF2 family helicase)	PF00176.23(SNF2_N:SNF2 family N-terminal domain); PF00271.31(Helicase_C:Helicase conserved C-terminal domain)	sp|Q6BIP2|RAD5_DEBHA(DNA repair protein RAD5 OS=Debaryomyces hansenii (strain ATCC 36239 / CBS 767 / JCM 1990 / NBRC 0083 / IGC 2968) OX=284592 GN=RAD5 PE=3 SV=2)
132828	fgenesh1_pm.20_#_81	hypothetical protein	1530	1.90258	Up	1.08096e-07	ENOG410YYJ2(S:Function unknown); ENOG41121U7(S:Function unknown)	ENOG410YYJ2(Mannosyltransferase putative); ENOG41121U7(Strain CBS138 chromosome C complete sequence)	PF11051.8(Mannosyl_trans3:Mannosyltransferase putative)	sp|P40549|MNT3_YEAST(Alpha-1,3-mannosyltransferase MNT3 OS=Saccharomyces cerevisiae (strain ATCC 204508 / S288c) OX=559292 GN=MNT3 PE=1 SV=1)
142266	estExt_fgenesh1_pg.C_160192	ferric reductase transmembrane component 7	3042	1.90212	Up	8.54938e-21	ENOG410XNZY(J:Translation, ribosomal structure and biogenesis)	ENOG410XNZY(Exosome complex)	PF01794.19(Ferric_reduct:Ferric reductase like transmembrane component); PF08030.12(NAD_binding_6:Ferric reductase NAD binding domain); PF08022.12(FAD_binding_8:FAD-binding domain); PF00175.21(NAD_binding_1:Oxidoreductase NAD-binding domain)	sp|Q12333|FRE7_YEAST(Ferric/cupric reductase transmembrane component 7 OS=Saccharomyces cerevisiae (strain ATCC 204508 / S288c) OX=559292 GN=FRE7 PE=1 SV=2)
84853	e_gw1.16.135.1	MFS general substrate transporter	1653	1.90117	Up	1.23373e-12	ENOG410Y9K5(U:Intracellular trafficking, secretion, and vesicular transport)	ENOG410Y9K5(Efflux pump antibiotic resistance protein)	PF07690.16(MFS_1:Major Facilitator Superfamily)	sp|Q9P6J7|YHD3_SCHPO(Uncharacterized MFS-type transporter C1683.03c OS=Schizosaccharomyces pombe (strain 972 / ATCC 24843) OX=284812 GN=SPBC1683.03c PE=3 SV=1)
9930	gm1.5486_g	hypothetical protein	2484	1.89947	Up	1.10561e-43	COG3145(L:Replication, recombination and repair)	COG3145(Alkylated DNA repair protein)	PF13532.6(2OG-FeII_Oxy_2:2OG-Fe(II) oxygenase superfamily); PF00857.20(Isochorismatase:Isochorismatase family); PF14497.6(GST_C_3:Glutathione S-transferase, C-terminal domain)	sp|Q58DM4|ALKB2_BOVIN(DNA oxidative demethylase ALKBH2 OS=Bos taurus OX=9913 GN=ALKBH2 PE=2 SV=1)
131937	fgenesh1_pm.16_#_39	alpha/beta-Hydrolase	942	1.89896	Up	1.31172e-36	ENOG410YBNF(S:Function unknown); COG0412(S:Function unknown)	ENOG410YBNF(Dienelactone hydrolase family protein); COG0412(Dienelactone hydrolase family protein)	PF01738.18(DLH:Dienelactone hydrolase family)	sp|B8M9K0|TROPI_TALSN(Hydrolase tropI OS=Talaromyces stipitatus (strain ATCC 10500 / CBS 375.48 / QM 6759 / NRRL 1006) OX=441959 GN=tropI PE=3 SV=1)
12409	gm1.7965_g	MUS38-like protein	2871	1.89738	Up	1.51942e-31	COG1948(S:Function unknown)	COG1948(-)	PF02732.15(ERCC4:ERCC4 domain)	sp|P36617|RAD16_SCHPO(DNA repair protein rad16 OS=Schizosaccharomyces pombe (strain 972 / ATCC 24843) OX=284812 GN=rad16 PE=1 SV=2)
128631	fgenesh1_pm.5_#_169	hypothetical protein	3543	1.89397	Up	3.21474e-22	COG0784(G:Carbohydrate transport and metabolism)	COG0784(alpha amylase, catalytic)	PF02518.26(HATPase_c:Histidine kinase-, DNA gyrase B-, and HSP90-like ATPase); PF00072.24(Response_reg:Response regulator receiver domain); PF00512.25(HisKA:His Kinase A (phospho-acceptor) domain)	sp|Q54YZ9|DHKJ_DICDI(Hybrid signal transduction histidine kinase J OS=Dictyostelium discoideum OX=44689 GN=dhkJ PE=3 SV=2)
11773	gm1.7329_g	putative cytochrome P450	1542	1.89395	Up	1.58463e-16	COG2124(S:Function unknown)	COG2124(tHO complex)	PF00067.22(p450:Cytochrome P450)	sp|A2QTE8|EPAE_ASPNC(Cytochrome P450 monooxygenase orf2 OS=Aspergillus niger (strain CBS 513.88 / FGSC A1513) OX=425011 GN=orf2 PE=3 SV=1)
83248	e_gw1.13.143.1	hypothetical protein	591	1.89289	Up	2.13564e-34	ENOG41121N2(H:Coenzyme transport and metabolism)	ENOG41121N2(riboflavin biosynthesis protein ribF)	PF13639.6(zf-RING_2:Ring finger domain); PF12678.7(zf-rbx1:RING-H2 zinc finger domain); PF12861.7(zf-ANAPC11:Anaphase-promoting complex subunit 11 RING-H2 finger); PF13920.6(zf-C3HC4_3:Zinc finger, C3HC4 type (RING finger))	sp|P38239|YBR2_YEAST(Uncharacterized RING finger protein YBR062C OS=Saccharomyces cerevisiae (strain ATCC 204508 / S288c) OX=559292 GN=YBR062C PE=1 SV=2)
78253	e_gw1.7.777.1	hypothetical protein	411	1.89204	Up	6.87692e-26	ENOG41126R5(S:Function unknown)	ENOG41126R5(Conserved hypothetical, protein)	PF02297.17(COX6B:Cytochrome oxidase c subunit VIb)	sp|G2TRP6|COA6_SCHPO(Cytochrome c oxidase subunit 6B-like protein new16 OS=Schizosaccharomyces pombe (strain 972 / ATCC 24843) OX=284812 GN=new16 PE=2 SV=1)
129429	fgenesh1_pm.7_#_102	hypothetical protein	1800	1.89142	Up	1.9403e-12	ENOG410XNZY(E:Amino acid transport and metabolism)	ENOG410XNZY(Catalyzes the reversible interconversion of serine and glycine with tetrahydrofolate (THF) serving as the one-carbon carrier. This reaction serves as the major source of one-carbon groups required for the biosynthesis of purines, thymidylate, methionine, and other important biomolecules. Also exhibits THF- independent aldolase activity toward beta-hydroxyamino acids, producing glycine…	PF01794.19(Ferric_reduct:Ferric reductase like transmembrane component); PF08030.12(NAD_binding_6:Ferric reductase NAD binding domain); PF08022.12(FAD_binding_8:FAD-binding domain); PF00175.21(NAD_binding_1:Oxidoreductase NAD-binding domain)	sp|O94727|FRP2_SCHPO(Ferric/cupric reductase transmembrane component 2 OS=Schizosaccharomyces pombe (strain 972 / ATCC 24843) OX=284812 GN=frp2 PE=3 SV=1)
137254	estExt_fgenesh1_pm.C_90020	Mitochondrial carrier	1128	1.89051	Up	2.73474e-85	ENOG410XRMK(U:Intracellular trafficking, secretion, and vesicular transport); ENOG410XNZ7(S:Function unknown)	ENOG410XRMK(solute carrier family 25, member 38); ENOG410XNZ7(Oligomeric golgi complex)	PF00153.27(Mito_carr:Mitochondrial carrier protein)	sp|A7F9Y3|S2538_SCLS1(Mitochondrial glycine transporter OS=Sclerotinia sclerotiorum (strain ATCC 18683 / 1980 / Ss-1) OX=665079 GN=SS1G_14414 PE=3 SV=1)
127720	fgenesh1_pm.3_#_309	hypothetical protein	768	1.88753	Up	1.9004e-06	ENOG410XX2C(S:Function unknown); ENOG410Y7AU(S:Function unknown)	ENOG410XX2C(DASH complex subunit Duo1); ENOG410Y7AU(DASH complex subunit Duo1)	PF08651.10(DASH_Duo1:DASH complex subunit Duo1)	sp|O74372|DUO1_SCHPO(DASH complex subunit duo1 OS=Schizosaccharomyces pombe (strain 972 / ATCC 24843) OX=284812 GN=duo1 PE=3 SV=2)
83782	e_gw1.14.356.1	General substrate transporter	1635	1.88671	Up	1.03026e-15	COG0477(S:Function unknown); ENOG410XNQK(S:Function unknown)	COG0477(-); ENOG410XNQK(-)	PF00083.24(Sugar_tr:Sugar (and other) transporter); PF07690.16(MFS_1:Major Facilitator Superfamily)	sp|P53048|MAL11_YEAST(General alpha-glucoside permease OS=Saccharomyces cerevisiae (strain ATCC 204508 / S288c) OX=559292 GN=MAL11 PE=1 SV=1)
101805	estExt_Genewise1Plus.C_16_t20031	elongation factor Tu	1502	1.88314	Up	0	COG0050(J:Translation, ribosomal structure and biogenesis)	COG0050(This protein promotes the GTP-dependent binding of aminoacyl-tRNA to the A-site of ribosomes during protein biosynthesis (By similarity))	PF00009.27(GTP_EFTU:Elongation factor Tu GTP binding domain); PF03143.17(GTP_EFTU_D3:Elongation factor Tu C-terminal domain); PF03144.25(GTP_EFTU_D2:Elongation factor Tu domain 2); PF01926.23(MMR_HSR1:50S ribosome-binding GTPase)	sp|P02992|EFTU_YEAST(Elongation factor Tu, mitochondrial OS=Saccharomyces cerevisiae (strain ATCC 204508 / S288c) OX=559292 GN=TUF1 PE=1 SV=1)
63061	gw1.29.244.1	hypothetical protein	1467	1.88209	Up	3.2658e-11	ENOG4111W79(S:Function unknown)	ENOG4111W79(Conserved hypothetical, protein)		sp|O14013|RRN5_SCHPO(RNA polymerase I-specific transcription initiation factor rrn5 OS=Schizosaccharomyces pombe (strain 972 / ATCC 24843) OX=284812 GN=rrn5 PE=1 SV=1)
32516	fgenesh1_pg.2_#_44	hypothetical protein	939	1.88121	Up	2.33058e-09	COG0847(L:Replication, recombination and repair)	COG0847(Conserved hypothetical, protein)	PF00929.24(RNase_T:Exonuclease); PF01612.20(DNA_pol_A_exo1:3'-5' exonuclease)	sp|Q4IEV5|REXO4_GIBZE(RNA exonuclease 4 OS=Gibberella zeae (strain PH-1 / ATCC MYA-4620 / FGSC 9075 / NRRL 31084) OX=229533 GN=REX4 PE=3 SV=1)
139060	estExt_fgenesh1_pm.C_280023	UBC-like protein	1109	1.88028	Up	5.47828e-49	COG5078(K:Transcription)	COG5078(transcription initiation factor complex)	PF00179.26(UQ_con:Ubiquitin-conjugating enzyme)	sp|Q9Y385|UB2J1_HUMAN(Ubiquitin-conjugating enzyme E2 J1 OS=Homo sapiens OX=9606 GN=UBE2J1 PE=1 SV=2)
88423	e_gw1.23.42.1	ClpP/crotonase	774	1.87997	Up	2.71072e-40	COG1024(S:Function unknown)	COG1024(Protein of unknown function (DUF2781))	PF00378.20(ECH_1:Enoyl-CoA hydratase/isomerase); PF16113.5(ECH_2:Enoyl-CoA hydratase/isomerase)	sp|Q52995|ECHH_RHIME(Probable enoyl-CoA hydratase OS=Rhizobium meliloti (strain 1021) OX=266834 GN=fadB1 PE=3 SV=2)
82446	e_gw1.12.291.1	hypothetical protein	3039	1.87971	Up	4.65244e-13	COG2940(S:Function unknown)	COG2940(sphingolipid long chain base-responsive protein)	PF18601.1(EZH2_N:EZH2 N-terminal domain); PF18600.1(Ezh2_MCSS:MCSS domain); PF00856.28(SET:SET domain); PF18264.1(preSET_CXC:CXC domain)	sp|A7E2Z2|EZH1_BOVIN(Histone-lysine N-methyltransferase EZH1 OS=Bos taurus OX=9913 GN=EZH1 PE=2 SV=2)
13032	gm1.8588_g	FAD/NAD(P)-binding domain-containing protein	1626	1.87915	Up	3.4568e-19	ENOG410ZZJQ(S:Function unknown)	ENOG410ZZJQ(AMine oXidase)	PF01593.24(Amino_oxidase:Flavin containing amine oxidoreductase); PF13450.6(NAD_binding_8:NAD(P)-binding Rossmann-like domain); PF07992.14(Pyr_redox_2:Pyridine nucleotide-disulphide oxidoreductase); PF13454.6(NAD_binding_9:FAD-NAD(P)-binding); PF00070.27(Pyr_redox:Pyridine nucleotide-disulphide oxidoreductase)	sp|Q8H191|PAO4_ARATH(Probable polyamine oxidase 4 OS=Arabidopsis thaliana OX=3702 GN=PAO4 PE=1 SV=1)
33168	fgenesh1_pg.3_#_46	TPA_inf: chitinase 18-6	1479	1.87902	Up	1.9004e-06	COG3325(S:Function unknown)	COG3325(conserved hypothetical protein)	PF00704.28(Glyco_hydro_18:Glycosyl hydrolases family 18)	sp|Q873X9|CHIB1_ASPFM(Endochitinase B1 OS=Neosartorya fumigata OX=746128 GN=chiB1 PE=1 SV=1)
86704	e_gw1.19.11.1	hypothetical protein	2673	1.87697	Up	6.37006e-27	COG1472(E:Amino acid transport and metabolism)	COG1472(1-aminocyclopropane-1-carboxylate deaminase)	PF00933.21(Glyco_hydro_3:Glycosyl hydrolase family 3 N terminal domain); PF01915.22(Glyco_hydro_3_C:Glycosyl hydrolase family 3 C-terminal domain); PF14310.6(Fn3-like:Fibronectin type III-like domain)	sp|B0YD91|BGLE_ASPFC(Probable beta-glucosidase E OS=Neosartorya fumigata (strain CEA10 / CBS 144.89 / FGSC A1163) OX=451804 GN=bglE PE=3 SV=1)
74263	e_gw1.4.1137.1	hypothetical protein	2226	1.87582	Up	6.58096e-08	ENOG411014S(S:Function unknown)	ENOG411014S(Conserved hypothetical, protein)	PF14613.6(DUF4449:Protein of unknown function (DUF4449))	sp|Q10327|YD72_SCHPO(Uncharacterized protein C32A11.02c OS=Schizosaccharomyces pombe (strain 972 / ATCC 24843) OX=284812 GN=SPAC32A11.02c PE=4 SV=1)
136697	estExt_fgenesh1_pm.C_50396	hypothetical protein	3378	1.87516	Up	1.02473e-59	COG0388(S:Function unknown)	COG0388(nitrilase cyanide hydratase and apolipoprotein n-acyltransferase)	PF00795.22(CN_hydrolase:Carbon-nitrogen hydrolase)	sp|O60178|NTA1_SCHPO(Protein N-terminal amidase OS=Schizosaccharomyces pombe (strain 972 / ATCC 24843) OX=284812 GN=nta1 PE=3 SV=1)
116402	estExt_Genewise1.C_370112	putative impact protein	1577	1.87365	Up	6.00618e-09	COG1739(S:Function unknown)	COG1739(Conserved hypothetical, protein)	PF01205.19(UPF0029:Uncharacterized protein family UPF0029)	sp|P25637|YIH1_YEAST(Protein IMPACT homolog OS=Saccharomyces cerevisiae (strain ATCC 204508 / S288c) OX=559292 GN=YIH1 PE=1 SV=1)
81500	e_gw1.11.694.1	ClpP/crotonase	1440	1.87228	Up	2.97826e-72	COG1024(G:Carbohydrate transport and metabolism)	COG1024(Dihydroxyacetone kinase)	PF16113.5(ECH_2:Enoyl-CoA hydratase/isomerase); PF00378.20(ECH_1:Enoyl-CoA hydratase/isomerase)	sp|Q5ZJ60|HIBCH_CHICK(3-hydroxyisobutyryl-CoA hydrolase, mitochondrial OS=Gallus gallus OX=9031 GN=HIBCH PE=2 SV=1)
5319	gm1.875_g	hypothetical protein	1632	1.87072	Up	4.00234e-08	ENOG410YBSE(S:Function unknown); ENOG410Y5C0(S:Function unknown)	ENOG410YBSE(-); ENOG410Y5C0(-)	PF10256.9(Erf4:Golgin subfamily A member 7/ERF4 family)
90478	e_gw1.29.42.1	expressed protein	408	1.87035	Up	4.69712e-69	ENOG410XPA0(O:Posttranslational modification, protein turnover, chaperones)	ENOG410XPA0(Nuclear receptor interacting protein)	PF00627.31(UBA:UBA/TS-N domain)	sp|Q7S906|DDI1_NEUCR(DNA damage-inducible protein 1 OS=Neurospora crassa (strain ATCC 24698 / 74-OR23-1A / CBS 708.71 / DSM 1257 / FGSC 987) OX=367110 GN=ddi-1 PE=3 SV=2)
77316	e_gw1.6.453.1	hypothetical protein	1539	1.87034	Up	2.27774e-83	COG0706(U:Intracellular trafficking, secretion, and vesicular transport)	COG0706(Required for the insertion and or proper folding and or complex formation of integral membrane proteins into the membrane. Involved in integration of membrane proteins that insert both dependently and independently of the Sec translocase complex, as well as at least some lipoproteins)	PF02096.20(60KD_IMP:60Kd inner membrane protein)	sp|O13375|OXA1_KAZSE(Mitochondrial inner membrane protein OXA1 OS=Kazachstania servazzii OX=27293 GN=OXA1 PE=3 SV=1)
88071	e_gw1.22.352.1	SNF2 superfamily RAD26-like protein	3036	1.86933	Up	8.90274e-18	ENOG410XP4Z(L:Replication, recombination and repair)	ENOG410XP4Z(excision repair cross-complementing rodent repair deficiency complementation group)	PF00176.23(SNF2_N:SNF2 family N-terminal domain); PF14773.6(VIGSSK:Helicase-associated putative binding domain, C-terminal); PF00271.31(Helicase_C:Helicase conserved C-terminal domain); PF04851.15(ResIII:Type III restriction enzyme, res subunit); PF16203.5(ERCC3_RAD25_C:ERCC3/RAD25/XPB C-terminal helicase); PF00270.29(DEAD:DEAD/DEAH box helicase); PF18766.1(SWI2_SNF2:SWI2/SNF2 ATPase)	sp|F4I2H2|CHR9_ARATH(Switch 2 OS=Arabidopsis thaliana OX=3702 GN=SWI2 PE=3 SV=1)
97398	estExt_Genewise1Plus.C_5_t10476	hypothetical protein	1524	1.86806	Up	1.86579e-12	ENOG410YBCW(S:Function unknown)	ENOG410YBCW(Fungal Zn(2)-Cys(6) binuclear cluster domain)	PF00172.18(Zn_clus:Fungal Zn(2)-Cys(6) binuclear cluster domain)	sp|P53338|MAL13_YEAST(Maltose fermentation regulatory protein MAL13 OS=Saccharomyces cerevisiae (strain ATCC 204508 / S288c) OX=559292 GN=MAL13 PE=3 SV=1)
79848	e_gw1.9.551.1	histone deacetylase domain-containing protein	1491	1.86659	Up	2.52918e-15	COG0123(B:Chromatin structure and dynamics); COG0123(Q:Secondary metabolites biosynthesis, transport and catabolism)	COG0123(Histone deacetylase); COG0123(Histone deacetylase)	PF00850.19(Hist_deacetyl:Histone deacetylase domain)	sp|O13298|PHD1_SCHPO(Histone deacetylase phd1 OS=Schizosaccharomyces pombe (strain 972 / ATCC 24843) OX=284812 GN=phd1 PE=1 SV=1)
92942	e_gw1.44.52.1	ABC1-domain containing protein	1971	1.86264	Up	8.71114e-215	COG0661(U:Intracellular trafficking, secretion, and vesicular transport)	COG0661(ascospore formation)	PF03109.16(ABC1:ABC1 family)	sp|A0A179HKZ8|LCSO_PURLI(ABC1 family protein lscO OS=Purpureocillium lilacinum OX=33203 GN=lcsO PE=2 SV=1)
33245	fgenesh1_pg.3_#_123	putative F1F0 ATP synthase assembly protein Atp10	1050	1.86052	Up	9.26464e-42	ENOG4111JYP(S:Function unknown)	ENOG4111JYP(F1F0 ATP synthase assembly protein Atp10)	PF05176.14(ATP-synt_10:ATP10 protein)	sp|Q6FWV2|ATP10_CANGA(Mitochondrial ATPase complex subunit ATP10 OS=Candida glabrata (strain ATCC 2001 / CBS 138 / JCM 3761 / NBRC 0622 / NRRL Y-65) OX=284593 GN=ATP10 PE=3 SV=1)
87029	e_gw1.20.116.1	Serine/threonine-protein kinase	2784	1.85798	Up	2.15868e-60	ENOG410XR01(T:Signal transduction mechanisms)	ENOG410XR01(Unc51-like kinase)	PF12063.8(DUF3543:Domain of unknown function (DUF3543)); PF00069.25(Pkinase:Protein kinase domain); PF07714.17(Pkinase_Tyr:Protein tyrosine kinase)	sp|J4W0G2|ATG1_BEAB2(Serine/threonine-protein kinase ATG1 OS=Beauveria bassiana (strain ARSEF 2860) OX=655819 GN=ATG1 PE=2 SV=1)
121672	estExt_fgenesh2_kg.C_1_t10293	expressed protein	1505	1.85788	Up	7.60232e-65	ENOG4110XF1(S:Function unknown)	ENOG4110XF1(-)
87466	e_gw1.21.387.1	hypothetical protein	594	1.8557	Up	9.01256e-05	ENOG4111W6V(S:Function unknown)	ENOG4111W6V(phosphatidylinositol N-acetylglucosaminyltransferase)	PF10181.9(PIG-H:GPI-GlcNAc transferase complex, PIG-H component)	sp|Q9Y7L7|GPI15_SCHPO(Phosphatidylinositol N-acetylglucosaminyltransferase subunit gpi15 OS=Schizosaccharomyces pombe (strain 972 / ATCC 24843) OX=284812 GN=gpi15 PE=3 SV=1)
32060	fgenesh1_pg.1_#_549	Isochorismatase hydrolase	687	1.85489	Up	2.43196e-08	COG1335(S:Function unknown)	COG1335(BTB POZ domain containing)	PF00857.20(Isochorismatase:Isochorismatase family)	sp|P53184|PNC1_YEAST(Nicotinamidase OS=Saccharomyces cerevisiae (strain ATCC 204508 / S288c) OX=559292 GN=PNC1 PE=1 SV=1)
102444	estExt_Genewise1Plus.C_19_t10336	hypothetical protein	1544	1.8548	Up	8.66772e-10	COG3391(S:Function unknown)	COG3391(40-residue yvtn family beta-propeller repeat protein)	PF10282.9(Lactonase:Lactonase, 7-bladed beta-propeller); PF02239.16(Cytochrom_D1:Cytochrome D1 heme domain)
95198	estExt_Genewise1Plus.C_2_t10206	CBD9-like protein	1625	1.85463	Up	1.2217e-46	ENOG4110EJC(S:Function unknown)	ENOG4110EJC(-)	PF16010.5(CDH-cyt:Cytochrome domain of cellobiose dehydrogenase); PF03188.16(Cytochrom_B561:Eukaryotic cytochrome b561)
72168	e_gw1.2.944.1	duf775 domain-containing protein	624	1.85451	Up	8.10872e-19	ENOG4111H6N(S:Function unknown)	ENOG4111H6N(chromosome 11 open reading frame 73)	PF05603.12(DUF775:Protein of unknown function (DUF775))	sp|O60175|OPI10_SCHPO(Protein OPI10 homolog OS=Schizosaccharomyces pombe (strain 972 / ATCC 24843) OX=284812 GN=SPBC21H7.06c PE=3 SV=1)
5304	gm1.860_g	endoglucanase I precursor	1380	1.8534	Up	0	ENOG410YC82(G:Carbohydrate transport and metabolism); ENOG410YC61(G:Carbohydrate transport and metabolism)	ENOG410YC82(Has endoglucanase activity on substrates containing beta-1,4 glycosidic bonds, like in carboxymethylcellulose (CMC), hydroxyethylcellulose (HEC) and beta-glucan. Involved in the degradation of complex natural cellulosic substrates); ENOG410YC61(endoglucanase)	PF00840.20(Glyco_hydro_7:Glycosyl hydrolase family 7); PF00734.18(CBM_1:Fungal cellulose binding domain)	sp|P07981|GUN1_HYPJE(Endoglucanase EG-1 OS=Hypocrea jecorina OX=51453 GN=egl1 PE=1 SV=1)
132696	fgenesh1_pm.19_#_158	isocitrate lyase	1791	1.85323	Up	2.99548e-120	COG2224(S:Function unknown)	COG2224(-)	PF00463.21(ICL:Isocitrate lyase family)	sp|G9NNY7|ACEB_HYPAI(2-methylisocitrate lyase, mitochondrial OS=Hypocrea atroviridis (strain ATCC 20476 / IMI 206040) OX=452589 GN=mcl PE=3 SV=1)
139245	estExt_fgenesh1_pm.C_320005	WLM-domain containing protein	1321	1.85195	Up	0	ENOG4111W00(S:Function unknown)	ENOG4111W00(Ubiquitin metalloprotease fusion protein)	PF08325.10(WLM:WLM domain)	sp|O94580|YQ77_SCHPO(Ubiquitin and WLM domain-containing metalloprotease SPCC1442.07c OS=Schizosaccharomyces pombe (strain 972 / ATCC 24843) OX=284812 GN=SPCC1442.07c PE=1 SV=1)
130992	fgenesh1_pm.12_#_34	Amidase signature enzyme	1779	1.85157	Up	7.71598e-20	COG0154(K:Transcription)	COG0154(cutinase gene palindrome-binding protein)	PF01425.21(Amidase:Amidase)	sp|Q7XJJ7|FAAH_ARATH(Fatty acid amide hydrolase OS=Arabidopsis thaliana OX=3702 GN=FAAH PE=1 SV=1)
26454	estExt_Genemark1.C_250060	S-adenosyl-L-methionine-dependent methyltransferase	1720	1.84976	Up	7.82552e-06	ENOG4111WRG(S:Function unknown)	ENOG4111WRG(Conserved hypothetical, protein)	PF00398.20(RrnaAD:Ribosomal RNA adenine dimethylase)
73493	e_gw1.3.494.1	hypothetical protein	1191	1.848	Up	6.27956e-08	COG0387(S:Function unknown)	COG0387(Ankyrin Repeat)	PF01699.24(Na_Ca_ex:Sodium/calcium exchanger protein)	sp|Q99385|VCX1_YEAST(Vacuolar calcium ion transporter OS=Saccharomyces cerevisiae (strain ATCC 204508 / S288c) OX=559292 GN=VCX1 PE=1 SV=1)
5292	gm1.848_g	aminotransferase class I and II	1191	1.848	Up	6.27956e-08	COG0436(J:Translation, ribosomal structure and biogenesis)	COG0436(Catalyzes the GTP-dependent ribosomal translocation step during translation elongation. During this step, the ribosome changes from the pre-translocational (PRE) to the post- translocational (POST) state as the newly formed A-site-bound peptidyl-tRNA and P-site-bound deacylated tRNA move to the P and E sites, respectively. Catalyzes the coordinated movement of the two tRNA molecules, the …	PF00155.21(Aminotran_1_2:Aminotransferase class I and II); PF00266.19(Aminotran_5:Aminotransferase class-V); PF01053.20(Cys_Met_Meta_PP:Cys/Met metabolism PLP-dependent enzyme); PF12897.7(Aminotran_MocR:Alanine-glyoxylate amino-transferase); PF01212.21(Beta_elim_lyase:Beta-eliminating lyase)	sp|Q9X0Y2|AAT_THEMA(Aspartate aminotransferase OS=Thermotoga maritima (strain ATCC 43589 / MSB8 / DSM 3109 / JCM 10099) OX=243274 GN=aspC PE=1 SV=1)
87449	e_gw1.21.333.1	hypothetical protein	3618	1.84643	Up	6.97934e-34	ENOG410YJ45(K:Transcription)	ENOG410YJ45(Forkhead domain protein)	PF00250.18(Forkhead:Forkhead domain); PF00498.26(FHA:FHA domain)	sp|O60129|FKH2_SCHPO(Fork head protein homolog 2 OS=Schizosaccharomyces pombe (strain 972 / ATCC 24843) OX=284812 GN=fkh2 PE=1 SV=1)
101004	estExt_Genewise1Plus.C_14_t10062	putative C6 transcription factor	2427	1.84639	Up	4.97576e-19	ENOG4111GB7(K:Transcription)	ENOG4111GB7(C6 transcription factor)	PF04082.18(Fungal_trans:Fungal specific transcription factor domain); PF00172.18(Zn_clus:Fungal Zn(2)-Cys(6) binuclear cluster domain)	sp|Q1MTM9|YFN1_SCHPO(Uncharacterized transcriptional regulatory protein C1327.01c OS=Schizosaccharomyces pombe (strain 972 / ATCC 24843) OX=284812 GN=SPAC1327.01c PE=1 SV=2)
68946	e_gw1.1.1276.1	DUF757-domain containing protein	495	1.84487	Up	4.3111e-132	ENOG4111SHF(S:Function unknown)	ENOG4111SHF(chromosome X open reading frame 26)	PF04669.13(Polysacc_synt_4:Polysaccharide biosynthesis)	sp|Q08971|YP225_YEAST(Protein PBDC1 homolog OS=Saccharomyces cerevisiae (strain ATCC 204508 / S288c) OX=559292 GN=YPL225W PE=1 SV=1)
133726	fgenesh1_pm.26_#_72	hypothetical protein	1767	1.84446	Up	1.26378e-18	ENOG4110WQT(S:Function unknown); ENOG410YEW8(S:Function unknown)	ENOG4110WQT(-); ENOG410YEW8(Fungal_trans)	PF04082.18(Fungal_trans:Fungal specific transcription factor domain)
116948	fgenesh2_kg.1_#_21_#_gi|38137290|gb|CF882608.1|CF882608	hypothetical protein	578	1.84363	Up	0.000238872
141324	estExt_fgenesh1_pg.C_80176	Acetyl-CoA synthetase-like protein	2329	1.843	Up	8.30532e-146	COG1022(I:Lipid transport and metabolism)	COG1022(Amp-dependent synthetase and ligase)	PF00501.28(AMP-binding:AMP-binding enzyme)	sp|Q8LKS5|LACS7_ARATH(Long chain acyl-CoA synthetase 7, peroxisomal OS=Arabidopsis thaliana OX=3702 GN=LACS7 PE=1 SV=2)
104386	estExt_Genewise1Plus.C_310232	hypothetical protein	1614	1.8413	Up	6.95532e-07			PF00069.25(Pkinase:Protein kinase domain)
71941	e_gw1.2.703.1	P-loop containing nucleoside triphosphate hydrolase protein	4413	1.84001	Up	5.49088e-104	COG1132(G:Carbohydrate transport and metabolism)	COG1132(hydrolase family 10)	PF00005.27(ABC_tran:ABC transporter); PF00664.23(ABC_membrane:ABC transporter transmembrane region); PF02463.19(SMC_N:RecF/RecN/SMC N terminal domain); PF13555.6(AAA_29:P-loop containing region of AAA domain); PF13476.6(AAA_23:AAA domain); PF03193.16(RsgA_GTPase:RsgA GTPase); PF13304.6(AAA_21:AAA domain, putative AbiEii toxin, Type IV TA system); PF01935.17(DUF87:Helicase HerA, central domain)	sp|Q9P7V2|ABC4_SCHPO(ATP-binding cassette transporter abc4 OS=Schizosaccharomyces pombe (strain 972 / ATCC 24843) OX=284812 GN=abc4 PE=3 SV=1)
34216	fgenesh1_pg.5_#_155	hypothetical protein	690	1.83781	Up	1.96744e-18	ENOG4111ZAY(S:Function unknown)	ENOG4111ZAY(Conserved hypothetical, protein)	PF09747.9(DUF2052:Coiled-coil domain containing protein (DUF2052))
70203	e_gw1.1.2876.1	hypothetical protein	1824	1.8375	Up	2.60856e-13	ENOG4110TAR(S:Function unknown)	ENOG4110TAR(-)	PF11951.8(Fungal_trans_2:Fungal specific transcription factor domain); PF00172.18(Zn_clus:Fungal Zn(2)-Cys(6) binuclear cluster domain)	sp|A0A067XMT7|PTAR3_PESFW(Pestheic acid cluster transcriptional regulator 3 OS=Pestalotiopsis fici (strain W106-1 / CGMCC3.15140) OX=1229662 GN=ptaR3 PE=3 SV=2)
80947	e_gw1.10.359.1	putative acetyltransferase%2C GNAT family	807	1.83745	Up	3.81744e-49	ENOG411214I(S:Function unknown)	ENOG411214I(Acetyltransferase (GNAT) family)
9725	gm1.5281_g	mannosyltransferase	1254	1.8365	Up	2.31296e-15	ENOG410XRDY(S:Function unknown)	ENOG410XRDY(Mannosyltransferase)	PF05007.13(Mannosyl_trans:Mannosyltransferase (PIG-M)); PF06728.13(PIG-U:GPI transamidase subunit PIG-U); PF09594.10(GT87:Glycosyltransferase family 87)	sp|Q4I073|GPI14_GIBZE(GPI mannosyltransferase 1 OS=Gibberella zeae (strain PH-1 / ATCC MYA-4620 / FGSC 9075 / NRRL 31084) OX=229533 GN=GPI14 PE=3 SV=1)
128057	fgenesh1_pm.4_#_54	hypothetical protein	1515	1.8357	Up	0.000238872	ENOG4111PYB(S:Function unknown)	ENOG4111PYB(-)	PF13229.6(Beta_helix:Right handed beta helix region)
142211	estExt_fgenesh1_pg.C_160108	ATP-dependent metallopeptidase Hfl	2703	1.83539	Up	2.4094e-263	COG0465(U:Intracellular trafficking, secretion, and vesicular transport)	COG0465(solute carrier family 4)	PF01434.18(Peptidase_M41:Peptidase family M41); PF00004.29(AAA:ATPase family associated with various cellular activities (AAA)); PF17862.1(AAA_lid_3:AAA+ lid domain); PF06480.15(FtsH_ext:FtsH Extracellular)	sp|P40341|YTA12_YEAST(Mitochondrial respiratory chain complexes assembly protein YTA12 OS=Saccharomyces cerevisiae (strain ATCC 204508 / S288c) OX=559292 GN=YTA12 PE=1 SV=2)
73770	e_gw1.3.50.1	GroES-like protein	1023	1.83535	Up	2.9839e-11	COG1064(S:Function unknown)	COG1064(Short-chain dehydrogenase reductase Sdr)	PF08240.12(ADH_N:Alcohol dehydrogenase GroES-like domain); PF00107.26(ADH_zinc_N:Zinc-binding dehydrogenase); PF13602.6(ADH_zinc_N_2:Zinc-binding dehydrogenase)	sp|A0A075TMP0|PATD_PENEN(Alcohol dehydrogenase patD OS=Penicillium expansum OX=27334 GN=patD PE=1 SV=1)
8421	gm1.3977_g	DNA-directed RNA polymerase III 130 kDa polypeptide	3474	1.83432	Up	8.04946e-28	COG0085(K:Transcription)	COG0085(DNA-dependent RNA polymerase catalyzes the transcription of DNA into RNA using the four ribonucleoside triphosphates as substrates (By similarity))	PF00562.28(RNA_pol_Rpb2_6:RNA polymerase Rpb2, domain 6); PF04563.15(RNA_pol_Rpb2_1:RNA polymerase beta subunit); PF04560.20(RNA_pol_Rpb2_7:RNA polymerase Rpb2, domain 7); PF04561.14(RNA_pol_Rpb2_2:RNA polymerase Rpb2, domain 2); PF04566.13(RNA_pol_Rpb2_4:RNA polymerase Rpb2, domain 4); PF04565.16(RNA_pol_Rpb2_3:RNA polymerase Rpb2, domain 3); PF04567.17(RNA_pol_Rpb2_5:RNA polymerase Rpb2, domain…	sp|Q10233|RPC2_SCHPO(DNA-directed RNA polymerase III subunit RPC2 OS=Schizosaccharomyces pombe (strain 972 / ATCC 24843) OX=284812 GN=rpc2 PE=2 SV=1)
55183	gw1.8.509.1	HET-domain containing protein	900	1.83429	Up	4.2032e-07	ENOG410YAT1(S:Function unknown)	ENOG410YAT1(Heterokaryon incompatibility protein (HET))	PF06985.11(HET:Heterokaryon incompatibility protein (HET))
133247	fgenesh1_pm.23_#_8	hypothetical protein	1125	1.83164	Up	6.24976e-14	ENOG410YG6P(S:Function unknown)	ENOG410YG6P(Finger protein)	PF00628.29(PHD:PHD-finger)	sp|O74508|SPP1_SCHPO(Set1 complex component spp1 OS=Schizosaccharomyces pombe (strain 972 / ATCC 24843) OX=284812 GN=spp1 PE=4 SV=1)
9763	gm1.5319_g	hypothetical protein	3066	1.83149	Up	1.69844e-12	ENOG410YPW7(S:Function unknown)	ENOG410YPW7(Myb-like DNA-binding domain protein)	PF10384.9(Scm3:Centromere protein Scm3)	sp|Q9HDY7|YK12_SCHPO(Uncharacterized protein PB1A10.02 OS=Schizosaccharomyces pombe (strain 972 / ATCC 24843) OX=284812 GN=SPAPB1A10.02 PE=4 SV=1)
39136	fgenesh1_pg.30_#_26	NAD(P)-binding protein	951	1.82994	Up	8.24434e-10	ENOG411028Q(S:Function unknown)	ENOG411028Q(Isoflavone reductase)	PF05368.13(NmrA:NmrA-like family); PF13460.6(NAD_binding_10:NAD(P)H-binding); PF01073.19(3Beta_HSD:3-beta hydroxysteroid dehydrogenase/isomerase family); PF01370.21(Epimerase:NAD dependent epimerase/dehydratase family)	sp|P52576|IFR_PEA(Isoflavone reductase OS=Pisum sativum OX=3888 GN=IFR PE=2 SV=1)
7263	gm1.2819_g	hypothetical protein	342	1.82598	Up	5.56254e-24	ENOG4112834(A:RNA processing and modification)	ENOG4112834(Assembly factor required for Rieske Fe-S protein RIP1 incorporation into the cytochrome b-c1 (CIII) complex. Functions as a chaperone, binding to this subunit within the mitochondrial matrix and stabilizing it prior to its translocation and insertion into the late CIII dimeric intermediate within the mitochondrial inner membrane. Modulates the mitochondrial matrix zinc pool (By simila…	PF05347.15(Complex1_LYR:Complex 1 protein (LYR family))	sp|C7ZKY9|MZM1_NECH7(Mitochondrial zinc maintenance protein 1, mitochondrial OS=Nectria haematococca (strain 77-13-4 / ATCC MYA-4622 / FGSC 9596 / MPVI) OX=660122 GN=MZM1 PE=3 SV=1)
72809	e_gw1.3.1387.1	Cyclin-like protein	1092	1.82595	Up	2.4318e-59	COG1405(G:Carbohydrate transport and metabolism)	COG1405(ribulose-phosphate 3-epimerase activity)	PF00382.19(TFIIB:Transcription factor TFIIB repeat); PF08271.12(TF_Zn_Ribbon:TFIIB zinc-binding); PF01857.20(RB_B:Retinoblastoma-associated protein B domain)	sp|O13749|TF2B_SCHPO(Transcription initiation factor IIB OS=Schizosaccharomyces pombe (strain 972 / ATCC 24843) OX=284812 GN=sua7 PE=3 SV=1)
140234	estExt_fgenesh1_pg.C_2_t10409	GDSL Lipase/Acylhydrolase family protein	923	1.82359	Up	2.08002e-16	COG2755(E:Amino acid transport and metabolism)	COG2755(lipolytic protein G-D-S-L family)	PF13472.6(Lipase_GDSL_2:GDSL-like Lipase/Acylhydrolase family); PF00657.22(Lipase_GDSL:GDSL-like Lipase/Acylhydrolase)	sp|Q9DB29|IAH1_MOUSE(Isoamyl acetate-hydrolyzing esterase 1 homolog OS=Mus musculus OX=10090 GN=Iah1 PE=1 SV=1)
129332	fgenesh1_pm.7_#_5	P-loop containing nucleoside triphosphate hydrolase protein	4902	1.82271	Up	4.09258e-44	COG1131(V:Defense mechanisms)	COG1131((ABC) transporter)	PF00005.27(ABC_tran:ABC transporter); PF13304.6(AAA_21:AAA domain, putative AbiEii toxin, Type IV TA system); PF12698.7(ABC2_membrane_3:ABC-2 family transporter protein); PF13555.6(AAA_29:P-loop containing region of AAA domain); PF13476.6(AAA_23:AAA domain); PF13732.6(DUF4162:Domain of unknown function (DUF4162))	sp|Q99758|ABCA3_HUMAN(ATP-binding cassette sub-family A member 3 OS=Homo sapiens OX=9606 GN=ABCA3 PE=1 SV=2)
70058	e_gw1.1.434.1	peroxisomal catalase	1491	1.82155	Up	9.48548e-23	COG0753(S:Function unknown)	COG0753(Conserved hypothetical, protein)	PF00199.19(Catalase:Catalase); PF06628.12(Catalase-rel:Catalase-related immune-responsive)	sp|P55306|CATA_SCHPO(Catalase OS=Schizosaccharomyces pombe (strain 972 / ATCC 24843) OX=284812 GN=cta1 PE=1 SV=1)
53585	gw1.6.670.1	Pet127-domain containing protein	2283	1.82045	Up	2.08002e-16	ENOG410XS77(S:Function unknown)	ENOG410XS77(Mitochondrial mRNA processing protein PET127)	PF08634.10(Pet127:Mitochondrial protein Pet127)	sp|O74832|PT127_SCHPO(mRNA degradation protein pet127, mitochondrial OS=Schizosaccharomyces pombe (strain 972 / ATCC 24843) OX=284812 GN=pet127 PE=3 SV=1)
25529	estExt_Genemark1.C_130116	GARP complex subunit Vps53	2544	1.8178	Up	8.65962e-35	ENOG410XNMT(U:Intracellular trafficking, secretion, and vesicular transport)	ENOG410XNMT(Vacuolar Protein)	PF04100.12(Vps53_N:Vps53-like, N-terminal); PF10475.9(Vps54_N:Vacuolar-sorting protein 54, of GARP complex); PF10474.9(DUF2451:Protein of unknown function C-terminus (DUF2451)); PF04437.13(RINT1_TIP1:RINT-1 / TIP-1 family); PF06248.13(Zw10:Centromere/kinetochore Zw10)	sp|Q5ZLD7|VPS53_CHICK(Vacuolar protein sorting-associated protein 53 homolog OS=Gallus gallus OX=9031 GN=VPS53 PE=2 SV=1)
77680	e_gw1.7.674.1	Metallo-hydrolase/oxidoreductase	873	1.81707	Up	5.31548e-35	COG0491(S:Function unknown)	COG0491(carrier protein)	PF17778.1(BLACT_WH:Beta-lactamase associated winged helix domain); PF00753.27(Lactamase_B:Metallo-beta-lactamase superfamily); PF12706.7(Lactamase_B_2:Beta-lactamase superfamily domain)	sp|Q1LZ83|LACB2_BOVIN(Endoribonuclease LACTB2 OS=Bos taurus OX=9913 GN=LACTB2 PE=2 SV=1)
9199	gm1.4755_g	DNA replication licensing factor mcm5	2166	1.81696	Up	6.07988e-22	COG1241(U:Intracellular trafficking, secretion, and vesicular transport)	COG1241(vacuolar protein sorting 54 homolog (S. cerevisiae))	PF00493.23(MCM:MCM P-loop domain); PF17207.3(MCM_OB:MCM OB domain); PF17855.1(MCM_lid:MCM AAA-lid domain); PF14551.6(MCM_N:MCM N-terminal domain); PF01078.21(Mg_chelatase:Magnesium chelatase, subunit ChlI); PF07728.14(AAA_5:AAA domain (dynein-related subfamily)); PF07726.11(AAA_3:ATPase family associated with various cellular activities (AAA))	sp|P41389|MCM5_SCHPO(DNA replication licensing factor mcm5 OS=Schizosaccharomyces pombe (strain 972 / ATCC 24843) OX=284812 GN=mcm5 PE=1 SV=2)
126586	fgenesh1_pm.1_#_1000	P-loop containing nucleoside triphosphate hydrolase protein	4188	1.8158	Up	1.29341e-35	COG1132(F:Nucleotide transport and metabolism)	COG1132(Purine nucleoside permease)	PF00664.23(ABC_membrane:ABC transporter transmembrane region); PF00005.27(ABC_tran:ABC transporter); PF02463.19(SMC_N:RecF/RecN/SMC N terminal domain); PF13555.6(AAA_29:P-loop containing region of AAA domain); PF09818.9(ABC_ATPase:Predicted ATPase of the ABC class)	sp|P12866|STE6_YEAST(Alpha-factor-transporting ATPase OS=Saccharomyces cerevisiae (strain ATCC 204508 / S288c) OX=559292 GN=STE6 PE=1 SV=1)
65450	gw1.3.1559.1	hypothetical protein	2061	1.81505	Up	9.67544e-32	ENOG41112CA(K:Transcription)	ENOG41112CA(pH-response regulator protein palF rim-8)	PF00339.29(Arrestin_N:Arrestin (or S-antigen), N-terminal domain)	sp|Q52FM1|PALF_MAGO7(pH-response regulator protein palF/RIM8 OS=Magnaporthe oryzae (strain 70-15 / ATCC MYA-4617 / FGSC 8958) OX=242507 GN=RIM8 PE=3 SV=2)
134880	fgenesh1_pm.41_#_34	hypothetical protein	1008	1.81491	Up	5.94306e-08	ENOG410YTDM(S:Function unknown)	ENOG410YTDM(-)
76728	e_gw1.6.72.1	NAD(P)-binding protein	1185	1.81373	Up	1.28447e-09	COG0604(S:Function unknown)	COG0604(Fungal_trans)	PF13602.6(ADH_zinc_N_2:Zinc-binding dehydrogenase); PF00107.26(ADH_zinc_N:Zinc-binding dehydrogenase)	sp|O42909|YBI2_SCHPO(Zinc-type alcohol dehydrogenase-like protein C16A3.02c OS=Schizosaccharomyces pombe (strain 972 / ATCC 24843) OX=284812 GN=SPBC16A3.02c PE=3 SV=1)
88912	e_gw1.24.439.1	hypothetical protein	855	1.81345	Up	2.8288e-11	ENOG4110WA2(S:Function unknown)	ENOG4110WA2(-)
98905	estExt_Genewise1Plus.C_8_t10387	hypothetical protein	3005	1.81223	Up	9.91036e-110	ENOG410YC9G(S:Function unknown)	ENOG410YC9G(-)
82415	e_gw1.12.342.1	Malate synthase	1629	1.81176	Up	2.74308e-28	COG2225(C:Energy production and conversion)	COG2225(malate synthase)	PF01274.22(Malate_synthase:Malate synthase)	sp|P28345|MASY_NEUCR(Malate synthase, glyoxysomal OS=Neurospora crassa (strain ATCC 24698 / 74-OR23-1A / CBS 708.71 / DSM 1257 / FGSC 987) OX=367110 GN=acu-9 PE=3 SV=2)
141170	estExt_fgenesh1_pg.C_70306	hypothetical protein	1479	1.81129	Up	3.409e-45	ENOG410YG9R(S:Function unknown)	ENOG410YG9R(-)
68830	e_gw1.1.2262.1	hypothetical protein	4464	1.81033	Up	2.96414e-146	ENOG410XRK6(O:Posttranslational modification, protein turnover, chaperones)	ENOG410XRK6(udp-glucose glycoprotein glucosyltransferase)	PF18404.1(Glyco_transf_24:Glucosyltransferase 24); PF18402.1(Thioredoxin_14:Thioredoxin-like domain); PF18403.1(Thioredoxin_15:Thioredoxin-like domain); PF18400.1(Thioredoxin_12:Thioredoxin-like domain); PF18401.1(Thioredoxin_13:Thioredoxin-like domain); PF06427.11(UDP-g_GGTase:UDP-glucose:Glycoprotein Glucosyltransferase); PF01501.20(Glyco_transf_8:Glycosyl transferase family 8)	sp|Q09140|UGGG_SCHPO(UDP-glucose:glycoprotein glucosyltransferase OS=Schizosaccharomyces pombe (strain 972 / ATCC 24843) OX=284812 GN=gpt1 PE=1 SV=2)
69917	e_gw1.1.793.1	hypothetical protein	3897	1.80996	Up	5.01054e-10	ENOG410YGPT(S:Function unknown)	ENOG410YGPT(-)
91326	e_gw1.32.80.1	hypothetical protein	5358	1.80903	Up	6.6762e-20	COG4886(S:Function unknown)	COG4886(-)	PF12799.7(LRR_4:Leucine Rich repeats (2 copies)); PF13855.6(LRR_8:Leucine rich repeat); PF13516.6(LRR_6:Leucine Rich repeat); PF14580.6(LRR_9:Leucine-rich repeat)	sp|O74473|CDC11_SCHPO(Septation initiation network scaffold protein cdc11 OS=Schizosaccharomyces pombe (strain 972 / ATCC 24843) OX=284812 GN=cdc11 PE=1 SV=1)
99896	estExt_Genewise1Plus.C_10_t20267	hypothetical protein	2677	1.80847	Up	1.68128e-28	ENOG410ZEPC(S:Function unknown)	ENOG410ZEPC(Fungal specific transcription factor domain)	PF04082.18(Fungal_trans:Fungal specific transcription factor domain); PF00172.18(Zn_clus:Fungal Zn(2)-Cys(6) binuclear cluster domain)	sp|Q1MTM9|YFN1_SCHPO(Uncharacterized transcriptional regulatory protein C1327.01c OS=Schizosaccharomyces pombe (strain 972 / ATCC 24843) OX=284812 GN=SPAC1327.01c PE=1 SV=2)
91959	e_gw1.36.143.1	hypothetical protein	1962	1.80735	Up	2.83114e-06			PF05887.11(Trypan_PARP:Procyclic acidic repetitive protein (PARP))
76090	e_gw1.5.551.1	hypothetical protein	2994	1.80735	Up	5.38434e-05	ENOG410XR8V(S:Function unknown)	ENOG410XR8V(aluminum-activated malate transporter)	PF10337.9(ArAE_2_N:Putative ER transporter, 6TM, N-terminal); PF10334.9(ArAE_2:Aromatic acid exporter family member 2); PF13515.6(FUSC_2:Fusaric acid resistance protein-like); PF11744.8(ALMT:Aluminium activated malate transporter)	sp|P87136|YDM5_SCHPO(Uncharacterized protein C57A7.05 OS=Schizosaccharomyces pombe (strain 972 / ATCC 24843) OX=284812 GN=SPAC57A7.05 PE=4 SV=1)
139957	estExt_fgenesh1_pg.C_1_t20291	putative kynurenine 3-monooxygenase	1750	1.80735	Up	2.08192e-110	COG0654(U:Intracellular trafficking, secretion, and vesicular transport)	COG0654(cornichon homolog)	PF01494.19(FAD_binding_3:FAD binding domain); PF07992.14(Pyr_redox_2:Pyridine nucleotide-disulphide oxidoreductase); PF13450.6(NAD_binding_8:NAD(P)-binding Rossmann-like domain); PF00070.27(Pyr_redox:Pyridine nucleotide-disulphide oxidoreductase); PF01266.24(DAO:FAD dependent oxidoreductase); PF01134.22(GIDA:Glucose inhibited division protein A); PF03486.14(HI0933_like:HI0933-like protein)	sp|Q7S3C9|KMO_NEUCR(Kynurenine 3-monooxygenase OS=Neurospora crassa (strain ATCC 24698 / 74-OR23-1A / CBS 708.71 / DSM 1257 / FGSC 987) OX=367110 GN=nic-3 PE=3 SV=3)
133005	fgenesh1_pm.21_#_81	hypothetical protein	2442	1.80423	Up	3.0438e-10	ENOG41107DA(S:Function unknown)	ENOG41107DA(Fungal_trans)	PF04082.18(Fungal_trans:Fungal specific transcription factor domain); PF00172.18(Zn_clus:Fungal Zn(2)-Cys(6) binuclear cluster domain)	sp|B8NJG9|LEPE_ASPFN(Transcription factor lepE OS=Aspergillus flavus (strain ATCC 200026 / FGSC A1120 / NRRL 3357 / JCM 12722 / SRRC 167) OX=332952 GN=lepB PE=3 SV=1)
79594	e_gw1.9.486.1	hypothetical protein	1467	1.8036	Up	2.2058e-14	ENOG4111A7T(S:Function unknown)	ENOG4111A7T(P4Hc)	PF13640.6(2OG-FeII_Oxy_3:2OG-Fe(II) oxygenase superfamily)
7051	gm1.2607_g	hypothetical protein	2760	1.80353	Up	1.28447e-09	ENOG410YIPC(U:Intracellular trafficking, secretion, and vesicular transport); ENOG4112BWR(S:Function unknown); ENOG411004K(S:Function unknown)	ENOG410YIPC(Vacuolar Protein); ENOG4112BWR(WD40); ENOG411004K(Putative serine esterase (DUF676))	PF12697.7(Abhydrolase_6:Alpha/beta hydrolase family); PF07819.13(PGAP1:PGAP1-like protein)	sp|Q5SNQ7|SRAC1_DANRE(Protein SERAC1 OS=Danio rerio OX=7955 GN=serac1 PE=3 SV=1)
142987	estExt_fgenesh1_pg.C_290001	MOSC domain-containing protein	1377	1.80261	Up	3.52836e-22	COG3217(S:Function unknown)	COG3217(Sulfatase domain protein)	PF03473.17(MOSC:MOSC domain); PF03476.16(MOSC_N:MOSC N-terminal beta barrel domain)	sp|O88994|MARC2_RAT(Mitochondrial amidoxime reducing component 2 OS=Rattus norvegicus OX=10116 GN=Marc2 PE=2 SV=1)
99998	estExt_Genewise1Plus.C_11_t10158	ARM repeat-containing protein	2425	1.80244	Up	1.27061e-56	ENOG410XQTG(S:Function unknown)	ENOG410XQTG(S. cerevisiae)	PF00069.25(Pkinase:Protein kinase domain); PF13646.6(HEAT_2:HEAT repeats); PF12717.7(Cnd1:non-SMC mitotic condensation complex subunit 1); PF07714.17(Pkinase_Tyr:Protein tyrosine kinase)	sp|Q55GS2|SCY1_DICDI(Probable inactive serine/threonine-protein kinase scy1 OS=Dictyostelium discoideum OX=44689 GN=scy1 PE=3 SV=1)
100706	estExt_Genewise1Plus.C_13_t10179	Rad1-domain containing protein	1185	1.80205	Up	6.65802e-38	ENOG410YHQU(L:Replication, recombination and repair)	ENOG410YHQU(RAD1 homolog (S. pombe))	PF02144.16(Rad1:Repair protein Rad1/Rec1/Rad17); PF05251.12(Ost5:Oligosaccharyltransferase subunit 5)	sp|P22193|RAD1_SCHPO(DNA damage checkpoint control protein rad1 OS=Schizosaccharomyces pombe (strain 972 / ATCC 24843) OX=284812 GN=rad1 PE=1 SV=2)
83512	e_gw1.14.108.1	chlorocatechol 1%2C2-dioxygenase	945	1.80186	Up	2.2058e-14	COG3485(S:Function unknown)	COG3485(Carboxy-cis,cis-muconate cyclase)	PF00775.21(Dioxygenase_C:Dioxygenase); PF04444.14(Dioxygenase_N:Catechol dioxygenase N terminus)	sp|P86029|HQD2_CANAL(Catechol 1,2-dioxygenase OS=Candida albicans (strain SC5314 / ATCC MYA-2876) OX=237561 GN=HQD2 PE=1 SV=1)
88145	e_gw1.22.268.1	hypothetical protein	3213	1.8011	Up	0.000376276	ENOG410Y7M1(S:Function unknown)	ENOG410Y7M1(NACHT domain)	PF12796.7(Ank_2:Ankyrin repeats (3 copies)); PF13857.6(Ank_5:Ankyrin repeats (many copies)); PF13637.6(Ank_4:Ankyrin repeats (many copies)); PF13606.6(Ank_3:Ankyrin repeat); PF13191.6(AAA_16:AAA ATPase domain); PF00023.30(Ank:Ankyrin repeat); PF05729.12(NACHT:NACHT domain); PF17100.5(NACHT_N:N-terminal domain of NWD NACHT-NTPase); PF13401.6(AAA_22:AAA domain)
98631	estExt_Genewise1Plus.C_7_t30096	ubiquitin carboxyl-terminal hydrolase	1826	1.79983	Up	5.08362e-55	ENOG410XQQ0(S:Function unknown)	ENOG410XQQ0(-)	PF00443.29(UCH:Ubiquitin carboxyl-terminal hydrolase); PF13423.6(UCH_1:Ubiquitin carboxyl-terminal hydrolase); PF02148.19(zf-UBP:Zn-finger in ubiquitin-hydrolases and other protein)	sp|Q09738|UBP8_SCHPO(Probable ubiquitin carboxyl-terminal hydrolase 8 OS=Schizosaccharomyces pombe (strain 972 / ATCC 24843) OX=284812 GN=ubp8 PE=3 SV=1)
140584	estExt_fgenesh1_pg.C_40061	MFS general substrate transporter	1759	1.79654	Up	2.46102e-28	ENOG410XQC7(S:Function unknown)	ENOG410XQC7(Major Facilitator Superfamily)	PF07690.16(MFS_1:Major Facilitator Superfamily)
56240	gw1.1.1847.1	hypothetical protein	558	1.79622	Up	4.72748e-10	ENOG4111UPB(S:Function unknown)	ENOG4111UPB(mitotic spindle organization in nucleus)	PF08653.10(DASH_Dam1:DASH complex subunit Dam1)	sp|Q6C2T8|DAM1_YARLI(DASH complex subunit DAM1 OS=Yarrowia lipolytica (strain CLIB 122 / E 150) OX=284591 GN=DAM1 PE=3 SV=1)
139633	estExt_fgenesh1_pg.C_1_t10124	Endoglucanase-4	1297	1.79583	Up	0	ENOG410YCFF(G:Carbohydrate transport and metabolism); ENOG410YBW9(G:Carbohydrate transport and metabolism)	ENOG410YCFF(Glycoside hydrolase family 61); ENOG410YBW9(endo-glucanase)	PF03443.14(Glyco_hydro_61:Glycosyl hydrolase family 61); PF00734.18(CBM_1:Fungal cellulose binding domain)	sp|O14405|GUN4_HYPJE(Endoglucanase-4 OS=Hypocrea jecorina OX=51453 GN=cel61a PE=1 SV=1)
23164	estExt_Genemark1.C_1_t10198	hypothetical protein	2447	1.79508	Up	4.26036e-18	ENOG410YHG6(S:Function unknown)	ENOG410YHG6(-)	PF11951.8(Fungal_trans_2:Fungal specific transcription factor domain); PF00172.18(Zn_clus:Fungal Zn(2)-Cys(6) binuclear cluster domain)	sp|C9K7C2|AMTR1_ALTAL(Transcription activator AMTR1 OS=Alternaria alternata OX=5599 GN=AMTR1 PE=2 SV=1)
23664	estExt_Genemark1.C_2_t10236	Type II DNA topoisomerase	5691	1.79403	Up	1.58753e-37	COG0187(L:Replication, recombination and repair)	COG0187(DNA gyrase negatively supercoils closed circular double- stranded DNA in an ATP-dependent manner and also catalyzes the interconversion of other topological isomers of double-stranded DNA rings, including catenanes and knotted rings (By similarity))	PF00521.20(DNA_topoisoIV:DNA gyrase/topoisomerase IV, subunit A); PF16898.5(TOPRIM_C:C-terminal associated domain of TOPRIM); PF00204.25(DNA_gyraseB:DNA gyrase B); PF02518.26(HATPase_c:Histidine kinase-, DNA gyrase B-, and HSP90-like ATPase); PF01751.22(Toprim:Toprim domain)	sp|Q9Y8G8|TOP2_PENCH(DNA topoisomerase 2 OS=Penicillium chrysogenum OX=5076 GN=TOP2 PE=3 SV=1)
139021	estExt_fgenesh1_pm.C_270062	hypothetical protein	2520	1.79391	Up	4.48228e-17	ENOG410YEW8(S:Function unknown); ENOG4110WQT(S:Function unknown)	ENOG410YEW8(Fungal Zn(2)-Cys(6) binuclear cluster domain); ENOG4110WQT(Fungal_trans)	PF00172.18(Zn_clus:Fungal Zn(2)-Cys(6) binuclear cluster domain)
12287	gm1.7843_g	hypothetical protein	834	1.79148	Up	6.35816e-12	ENOG410ZDJU(S:Function unknown)	ENOG410ZDJU(-)	PF15477.6(SMAP:Small acidic protein family)
111767	estExt_Genewise1.C_11_t10457	hypothetical protein	4181	1.78944	Up	5.73912e-60	COG5329(S:Function unknown)	COG5329(-)	PF02383.18(Syja_N:SacI homology domain); PF03372.23(Exo_endo_phos:Endonuclease/Exonuclease/phosphatase family)	sp|O43001|SYJ1_SCHPO(Inositol-1,4,5-trisphosphate 5-phosphatase 1 OS=Schizosaccharomyces pombe (strain 972 / ATCC 24843) OX=284812 GN=syj1 PE=1 SV=1)
124947	estExt_fgenesh2_kg.C_270007	Thiolase	1358	1.78884	Up	1.3567e-95	COG0183(S:Function unknown)	COG0183(alpha/beta hydrolase fold)	PF00108.23(Thiolase_N:Thiolase, N-terminal domain); PF02803.18(Thiolase_C:Thiolase, C-terminal domain)	sp|P07871|THIKB_RAT(3-ketoacyl-CoA thiolase B, peroxisomal OS=Rattus norvegicus OX=10116 GN=Acaa1b PE=1 SV=2)
69224	e_gw1.1.571.1	hypothetical protein	1791	1.78862	Up	3.20448e-31	COG0179(S:Function unknown)	COG0179(fasciclin domain family protein)	PF01557.18(FAA_hydrolase:Fumarylacetoacetate (FAA) hydrolase family); PF12146.8(Hydrolase_4:Serine aminopeptidase, S33); PF12697.7(Abhydrolase_6:Alpha/beta hydrolase family); PF00561.20(Abhydrolase_1:alpha/beta hydrolase fold)	sp|O06724|YISK_BACSU(Uncharacterized protein YisK OS=Bacillus subtilis (strain 168) OX=224308 GN=yisK PE=2 SV=1)
136969	estExt_fgenesh1_pm.C_70197	hypothetical protein	1541	1.78701	Up	1.92219e-05	ENOG410XVVB(K:Transcription)	ENOG410XVVB(DNA replication regulator sld-2)	PF11719.8(Drc1-Sld2:DNA replication and checkpoint protein)	sp|Q4HW93|SLD2_GIBZE(DNA replication regulator SLD2 OS=Gibberella zeae (strain PH-1 / ATCC MYA-4620 / FGSC 9075 / NRRL 31084) OX=229533 GN=SLD2 PE=3 SV=1)
85401	e_gw1.17.494.1	PNK3P-domain containing protein	1398	1.78453	Up	5.58354e-08	COG0241(E:Amino acid transport and metabolism)	COG0241(histidinol-phosphatase activity)	PF08645.11(PNK3P:Polynucleotide kinase 3 phosphatase); PF13671.6(AAA_33:AAA domain)	sp|O13911|PNK1_SCHPO(Bifunctional polynucleotide phosphatase/kinase OS=Schizosaccharomyces pombe (strain 972 / ATCC 24843) OX=284812 GN=pnk1 PE=1 SV=2)
75428	e_gw1.5.246.1	DNase I-like protein	1980	1.78355	Up	4.27974e-25	COG0708(L:Replication, recombination and repair)	COG0708(Exodeoxyribonuclease III)	PF03372.23(Exo_endo_phos:Endonuclease/Exonuclease/phosphatase family)	sp|P87175|APN2_SCHPO(DNA-(apurinic or apyrimidinic site) lyase 2 OS=Schizosaccharomyces pombe (strain 972 / ATCC 24843) OX=284812 GN=apn2 PE=1 SV=1)
89291	e_gw1.26.76.1	putative maltose permease	1518	1.78338	Up	1.92219e-05	ENOG410XNQK(S:Function unknown)	ENOG410XNQK(Fungal_trans)	PF00083.24(Sugar_tr:Sugar (and other) transporter); PF07690.16(MFS_1:Major Facilitator Superfamily)	sp|P53048|MAL11_YEAST(General alpha-glucoside permease OS=Saccharomyces cerevisiae (strain ATCC 204508 / S288c) OX=559292 GN=MAL11 PE=1 SV=1)
84474	e_gw1.15.448.1	DUF1687-domain containing protein	399	1.78278	Up	1.39725e-87	ENOG4111UI5(S:Function unknown)	ENOG4111UI5(Conserved hypothetical, protein)	PF07955.11(DUF1687:Protein of unknown function (DUF1687))
71146	e_gw1.2.789.1	amidohydrolase	1398	1.78258	Up	3.56422e-37	COG1228(H:Coenzyme transport and metabolism)	COG1228(4-alpha-hydroxytetrahydrobiopterin dehydratase activity)	PF01979.20(Amidohydro_1:Amidohydrolase family); PF07969.11(Amidohydro_3:Amidohydrolase family)	sp|P40896|YJV3_YEAST(Uncharacterized protein YJL213W OS=Saccharomyces cerevisiae (strain ATCC 204508 / S288c) OX=559292 GN=YJL213W PE=3 SV=1)
93049	e_gw1.45.51.1	MFS general substrate transporter	1503	1.78253	Up	1.01815e-34	ENOG41105J2(S:Function unknown)	ENOG41105J2((MFS) transporter)	PF07690.16(MFS_1:Major Facilitator Superfamily); PF06813.13(Nodulin-like:Nodulin-like)	sp|Q03795|YM30_YEAST(Uncharacterized membrane protein YMR155W OS=Saccharomyces cerevisiae (strain ATCC 204508 / S288c) OX=559292 GN=YMR155W PE=1 SV=1)
141869	estExt_fgenesh1_pg.C_130025	alpha/beta-Hydrolase	1162	1.78199	Up	1.25065e-39	ENOG4111PKC(S:Function unknown); ENOG4111XCX(S:Function unknown); COG0596(S:Function unknown)	ENOG4111PKC(alpha/beta hydrolase fold); ENOG4111XCX(alpha/beta hydrolase fold); COG0596(alpha/beta hydrolase fold)	PF00561.20(Abhydrolase_1:alpha/beta hydrolase fold); PF12697.7(Abhydrolase_6:Alpha/beta hydrolase family); PF12146.8(Hydrolase_4:Serine aminopeptidase, S33)	sp|A8IAD8|RUTD_AZOC5(Putative aminoacrylate hydrolase RutD OS=Azorhizobium caulinodans (strain ATCC 43989 / DSM 5975 / JCM 20966 / NBRC 14845 / NCIMB 13405 / ORS 571) OX=438753 GN=rutD PE=3 SV=1)
106993	estExt_Genewise1.C_2_t20174	hypothetical protein	1923	1.78022	Up	8.4467e-05	ENOG4111ZKA(S:Function unknown); ENOG410YAHA(S:Function unknown); COG0666(S:Function unknown)	ENOG4111ZKA(C2H2 finger domain protein); ENOG410YAHA(-); COG0666(Ankyrin Repeat)
73258	e_gw1.3.67.1	3-hydroxyisobutyrate dehydrogenase	999	1.77917	Up	4.1308e-11	COG2084(I:Lipid transport and metabolism)	COG2084(Dehydrogenase)	PF03446.15(NAD_binding_2:NAD binding domain of 6-phosphogluconate dehydrogenase); PF14833.6(NAD_binding_11:NAD-binding of NADP-dependent 3-hydroxyisobutyrate dehydrogenase); PF03807.17(F420_oxidored:NADP oxidoreductase coenzyme F420-dependent); PF02423.15(OCD_Mu_crystall:Ornithine cyclodeaminase/mu-crystallin family); PF00056.23(Ldh_1_N:lactate/malate dehydrogenase, NAD binding domain); PF01408.2…	sp|Q9V8M5|3HIDH_DROME(Probable 3-hydroxyisobutyrate dehydrogenase, mitochondrial OS=Drosophila melanogaster OX=7227 GN=CG15093 PE=2 SV=2)
36906	fgenesh1_pg.14_#_185	nicotinate-nucleotide diphosphorylase	921	1.77888	Up	3.94644e-34	COG0157(H:Coenzyme transport and metabolism)	COG0157(nicotinate-nucleotide diphosphorylase (carboxylating) activity)	PF01729.19(QRPTase_C:Quinolinate phosphoribosyl transferase, C-terminal domain); PF02749.16(QRPTase_N:Quinolinate phosphoribosyl transferase, N-terminal domain)	sp|P43619|NADC_YEAST(Nicotinate-nucleotide pyrophosphorylase [carboxylating] OS=Saccharomyces cerevisiae (strain ATCC 204508 / S288c) OX=559292 GN=BNA6 PE=1 SV=1)
79517	e_gw1.8.523.1	MFS general substrate transporter	1479	1.77799	Up	2.3845e-07	ENOG410XRHC(E:Amino acid transport and metabolism); COG0477(G:Carbohydrate transport and metabolism); ENOG4111MMB(S:Function unknown)	ENOG410XRHC(solute carrier family 16, member 10 (aromatic amino acid transporter)); COG0477(major facilitator Superfamily); ENOG4111MMB(Conserved hypothetical, protein)	PF07690.16(MFS_1:Major Facilitator Superfamily)	sp|B8N0F1|ASAE_ASPFN(MFS transporter asaE OS=Aspergillus flavus (strain ATCC 200026 / FGSC A1120 / NRRL 3357 / JCM 12722 / SRRC 167) OX=332952 GN=asaE PE=2 SV=1)
114225	estExt_Genewise1.C_200190	ubiquitin hydrolase L3	815	1.77787	Up	5.40778e-56	ENOG4111HNA(S:Function unknown)	ENOG4111HNA(Actin-interacting protein)	PF01088.21(Peptidase_C12:Ubiquitin carboxyl-terminal hydrolase, family 1)	sp|Q2TBG8|UCHL3_BOVIN(Ubiquitin carboxyl-terminal hydrolase isozyme L3 OS=Bos taurus OX=9913 GN=UCHL3 PE=2 SV=1)
132771	fgenesh1_pm.20_#_24	hypothetical protein	3684	1.77761	Up	1.92219e-05	ENOG410XUW6(S:Function unknown)	ENOG410XUW6(Chromo domain protein)	PF00385.24(Chromo:Chromo (CHRromatin Organisation MOdifier) domain)
58251	gw1.26.273.1	putative DCG1 protein	786	1.7761	Up	0.00022262	COG4126(E:Amino acid transport and metabolism)	COG4126(Hydantoin racemase)	PF01177.22(Asp_Glu_race:Asp/Glu/Hydantoin racemase)	sp|Q09921|YAKA_SCHPO(Uncharacterized protein C1F7.10 OS=Schizosaccharomyces pombe (strain 972 / ATCC 24843) OX=284812 GN=SPAC1F7.10 PE=3 SV=1)
136825	estExt_fgenesh1_pm.C_60325	glucosidase II alpha subunit	3093	1.77605	Up	1.05346e-104	COG1501(F:Nucleotide transport and metabolism)	COG1501(Major role in the synthesis of nucleoside triphosphates other than ATP. The ATP gamma phosphate is transferred to the NDP beta phosphate via a ping-pong mechanism, using a phosphorylated active-site intermediate (By similarity))	PF01055.26(Glyco_hydro_31:Glycosyl hydrolases family 31); PF13802.6(Gal_mutarotas_2:Galactose mutarotase-like); PF17137.4(DUF5110:Domain of unknown function (DUF5110))	sp|Q9US55|GLU2A_SCHPO(Glucosidase 2 subunit alpha OS=Schizosaccharomyces pombe (strain 972 / ATCC 24843) OX=284812 GN=gls2 PE=1 SV=1)
9419	gm1.4975_g	hypothetical protein	786	1.77573	Up	1.14891e-05	ENOG4110XP2(S:Function unknown)	ENOG4110XP2(-)
12475	gm1.8031_g	putative beta-N-acetylglucosaminidase	1602	1.77341	Up	8.1563e-14	COG1472(S:Function unknown); COG0454(S:Function unknown)	COG1472(Conserved hypothetical, protein); COG0454(Conserved hypothetical, protein)	PF00933.21(Glyco_hydro_3:Glycosyl hydrolase family 3 N terminal domain); PF01915.22(Glyco_hydro_3_C:Glycosyl hydrolase family 3 C-terminal domain)	sp|P40406|NAGZ_BACSU(Beta-hexosaminidase OS=Bacillus subtilis (strain 168) OX=224308 GN=nagZ PE=1 SV=1)
69494	e_gw1.1.2964.1	putative aldo-keto reductase	933	1.77325	Up	4.43676e-10	COG0656(K:Transcription)	COG0656(Myb DNA-binding)	PF00248.21(Aldo_ket_red:Aldo/keto reductase family)	sp|P78736|XYL1_PACTA(NAD(P)H-dependent D-xylose reductase OS=Pachysolen tannophilus OX=4918 GN=XYL1 PE=1 SV=1)
135893	estExt_fgenesh1_pm.C_2_t10356	2-nitropropane dioxygenase	1345	1.7724	Up	2.71998e-90	COG2070(U:Intracellular trafficking, secretion, and vesicular transport)	COG2070(translocase of inner mitochondrial membrane 21 homolog (yeast))	PF03060.15(NMO:Nitronate monooxygenase); PF00478.25(IMPDH:IMP dehydrogenase / GMP reductase domain); PF01070.18(FMN_dh:FMN-dependent dehydrogenase)	sp|O06179|Y1533_MYCTU(Putative monooxygenase Rv1533 OS=Mycobacterium tuberculosis (strain ATCC 25618 / H37Rv) OX=83332 GN=Rv1533 PE=1 SV=1)
132413	fgenesh1_pm.18_#_70	putative nucleoside transporter	1500	1.77077	Up	5.02716e-05	COG2252(S:Function unknown)	COG2252(Conserved fungal protein)	PF00860.20(Xan_ur_permease:Permease family); PF16983.5(MFS_MOT1:Molybdate transporter of MFS superfamily)	sp|O94300|YOOH_SCHPO(Putative xanthine/uracil permease C887.17 OS=Schizosaccharomyces pombe (strain 972 / ATCC 24843) OX=284812 GN=SPBC887.17 PE=3 SV=1)
137296	estExt_fgenesh1_pm.C_90089	UPF0171 domain protein	2363	1.76968	Up	3.79044e-25	ENOG410XP4E(S:Function unknown)	ENOG410XP4E(nitrogen permease regulator-like 3 (S. cerevisiae))	PF03666.13(NPR3:Nitrogen Permease regulator of amino acid transport activity 3)	sp|A2QQ79|NPR3_ASPNC(Nitrogen permease regulator 3 OS=Aspergillus niger (strain CBS 513.88 / FGSC A1513) OX=425011 GN=npr3 PE=3 SV=2)
128705	fgenesh1_pm.5_#_243	SGNH hydrolase	804	1.76959	Up	5.02716e-05	ENOG4111QMB(S:Function unknown)	ENOG4111QMB(GDSL-like Lipase/Acylhydrolase)	PF13472.6(Lipase_GDSL_2:GDSL-like Lipase/Acylhydrolase family); PF00657.22(Lipase_GDSL:GDSL-like Lipase/Acylhydrolase)	sp|Q9RLB8|CESA_RUMFL(Multidomain esterase OS=Ruminococcus flavefaciens OX=1265 GN=cesA PE=1 SV=1)
88023	e_gw1.22.6.1	hypothetical protein	987	1.76939	Up	1.14891e-05	ENOG4111KT5(A:RNA processing and modification)	ENOG4111KT5(Phosphodiesterase responsible for the U6 snRNA 3' end processing. Acts as an exoribonuclease (RNase) responsible for trimming the poly(U) tract of the last nucleotides in the pre-U6 snRNA molecule, leading to the formation of mature U6 snRNA)	PF09749.9(HVSL:Uncharacterised conserved protein)	sp|Q7SEZ0|USB1_NEUCR(U6 snRNA phosphodiesterase OS=Neurospora crassa (strain ATCC 24698 / 74-OR23-1A / CBS 708.71 / DSM 1257 / FGSC 987) OX=367110 GN=usb1 PE=3 SV=2)
131862	fgenesh1_pm.15_#_183	hypothetical protein	2772	1.76784	Up	2.54206e-59	COG0038(C:Energy production and conversion)	COG0038(Dehydrogenase)	PF00654.20(Voltage_CLC:Voltage gated chloride channel); PF00571.28(CBS:CBS domain)	sp|P51791|CLCN3_MOUSE(H(+)/Cl(-) exchange transporter 3 OS=Mus musculus OX=10090 GN=Clcn3 PE=1 SV=2)
90882	e_gw1.30.193.1	hypothetical protein	1956	1.76731	Up	0	ENOG410XNZY(P:Inorganic ion transport and metabolism)	ENOG410XNZY(Solute carrier family 31 copper transporters member)	PF01794.19(Ferric_reduct:Ferric reductase like transmembrane component); PF08030.12(NAD_binding_6:Ferric reductase NAD binding domain); PF08022.12(FAD_binding_8:FAD-binding domain)	sp|Q08905|FRE3_YEAST(Ferric reductase transmembrane component 3 OS=Saccharomyces cerevisiae (strain ATCC 204508 / S288c) OX=559292 GN=FRE3 PE=1 SV=1)
68642	e_gw1.1.2317.1	TIP41-domain containing protein	846	1.76701	Up	3.6236e-12	ENOG410XT96(S:Function unknown)	ENOG410XT96(TIP41, TOR signaling pathway regulator-like (S. cerevisiae))	PF04176.13(TIP41:TIP41-like family)	sp|Q5FW12|TIPRL_XENTR(TIP41-like protein OS=Xenopus tropicalis OX=8364 GN=tiprl PE=2 SV=1)
128996	fgenesh1_pm.6_#_130	hypothetical protein	519	1.76674	Up	2.40664e-24	ENOG41120K8(S:Function unknown)	ENOG41120K8(Conserved hypothetical, protein)
133387	fgenesh1_pm.24_#_8	hypothetical protein	1701	1.76646	Up	2.07016e-13	ENOG410XTD0(S:Function unknown)	ENOG410XTD0(C6 finger domain protein)	PF11951.8(Fungal_trans_2:Fungal specific transcription factor domain); PF00172.18(Zn_clus:Fungal Zn(2)-Cys(6) binuclear cluster domain)	sp|Q59QC7|UPC2_CANAL(Sterol uptake control protein 2 OS=Candida albicans (strain SC5314 / ATCC MYA-2876) OX=237561 GN=UPC2 PE=1 SV=1)
83902	e_gw1.14.589.1	stomatin family protein	1245	1.76392	Up	1.92449e-102	COG0330(O:Posttranslational modification, protein turnover, chaperones)	COG0330(ubiquitin-conjugating enzyme)	PF01145.25(Band_7:SPFH domain / Band 7 family); PF16200.5(Band_7_C:C-terminal region of band_7)	sp|O60121|YH77_SCHPO(Uncharacterized protein C16G5.07c OS=Schizosaccharomyces pombe (strain 972 / ATCC 24843) OX=284812 GN=SPBC16G5.07c PE=3 SV=1)
135104	fgenesh1_pm.50_#_11	dienelactone hydrolase	1404	1.7625	Up	2.99392e-05	COG0412(Q:Secondary metabolites biosynthesis, transport and catabolism)	COG0412(dienelactone hydrolase)	PF12680.7(SnoaL_2:SnoaL-like domain)
10306	gm1.5862_g	mitochondrial import inner membrane translocase subunit tim23	732	1.76099	Up	5.78052e-58	COG5596(H:Coenzyme transport and metabolism)	COG5596(Catalyzes the phosphorylation of the 3'-hydroxyl group of dephosphocoenzyme A to form coenzyme A (By similarity))	PF02466.19(Tim17:Tim17/Tim22/Tim23/Pmp24 family)	sp|Q9USM7|TIM23_SCHPO(Mitochondrial import inner membrane translocase subunit tim23 OS=Schizosaccharomyces pombe (strain 972 / ATCC 24843) OX=284812 GN=tim23 PE=3 SV=1)
75872	e_gw1.5.911.1	putative C6 transcription factor	2085	1.76011	Up	1.01051e-38	ENOG410YCYP(K:Transcription); ENOG410Y9SG(S:Function unknown)	ENOG410YCYP(Fungal_trans); ENOG410Y9SG(Transcription factor)	PF04082.18(Fungal_trans:Fungal specific transcription factor domain); PF00172.18(Zn_clus:Fungal Zn(2)-Cys(6) binuclear cluster domain)	sp|D7PI00|VRTR1_PENAE(Transcription factor vrtR1 OS=Penicillium aethiopicum OX=36650 GN=vrtR1 PE=1 SV=1)
130772	fgenesh1_pm.11_#_105	hypothetical protein	882	1.76006	Up	1.18432e-35	ENOG4110X0C(S:Function unknown)	ENOG4110X0C(-)
97264	estExt_Genewise1Plus.C_5_t10078	expressed protein	831	1.75933	Up	0	ENOG410YR3M(S:Function unknown); ENOG410YTU6(S:Function unknown)	ENOG410YR3M(-); ENOG410YTU6(integral membrane protein)	PF08592.11(DUF1772:Domain of unknown function (DUF1772))
31828	fgenesh1_pg.1_#_317	hypothetical protein	972	1.75917	Up	1.83074e-14	ENOG410YRDY(S:Function unknown)	ENOG410YRDY(-)
93948	estExt_Genewise1Plus.C_1_t20052	hypothetical protein	1722	1.75632	Up	6.96796e-45	ENOG4111JIV(S:Function unknown)	ENOG4111JIV(-)
127817	fgenesh1_pm.3_#_406	hypothetical protein	2421	1.75291	Up	0.00013187	ENOG4111GGK(S:Function unknown)	ENOG4111GGK(F-box domain protein)	PF12937.7(F-box-like:F-box-like)
140662	estExt_fgenesh1_pg.C_40246	Glutathione S-transferase%2C C-terminal-like protein	1077	1.7523	Up	6.91998e-153	ENOG410YJ3R(O:Posttranslational modification, protein turnover, chaperones)	ENOG410YJ3R(glutathione Stransferase)	PF14497.6(GST_C_3:Glutathione S-transferase, C-terminal domain); PF13410.6(GST_C_2:Glutathione S-transferase, C-terminal domain)
26581	estExt_Genemark1.C_270104	N-terminal nucleophile aminohydrolases (Ntn hydrolases)	1529	1.75229	Up	2.99392e-05	COG1446(S:Function unknown)	COG1446(-)	PF01112.18(Asparaginase_2:Asparaginase)	sp|Q54WW4|ASGX_DICDI(Putative isoaspartyl peptidase/L-asparaginase OS=Dictyostelium discoideum OX=44689 GN=DDB_G0279357 PE=3 SV=1)
103307	estExt_Genewise1Plus.C_240075	ribonucleoside-diphosphate reductase M2 subunit	1304	1.75221	Up	2.90168e-77	COG0208(F:Nucleotide transport and metabolism)	COG0208(Provides the precursors necessary for DNA synthesis. Catalyzes the biosynthesis of deoxyribonucleotides from the corresponding ribonucleotides (By similarity))	PF00268.21(Ribonuc_red_sm:Ribonucleotide reductase, small chain)	sp|Q9C167|RIR2_NEUCR(Ribonucleoside-diphosphate reductase small chain OS=Neurospora crassa (strain ATCC 24698 / 74-OR23-1A / CBS 708.71 / DSM 1257 / FGSC 987) OX=367110 GN=rnr-2 PE=3 SV=2)
112728	estExt_Genewise1.C_14_t10290	hypothetical protein	3594	1.75156	Up	1.37467e-17	ENOG41128BM(S:Function unknown)	ENOG41128BM(Conserved hypothetical, protein)	PF07738.13(Sad1_UNC:Sad1 / UNC-like C-terminal)
100829	estExt_Genewise1Plus.C_13_t10386	zf-UBP-domain containing protein	2145	1.75127	Up	6.08384e-72	ENOG410XSS2(S:Function unknown)	ENOG410XSS2(BRCA1 associated protein)	PF07576.12(BRAP2:BRCA1-associated protein 2); PF02148.19(zf-UBP:Zn-finger in ubiquitin-hydrolases and other protein); PF13639.6(zf-RING_2:Ring finger domain); PF17123.5(zf-RING_11:RING-like zinc finger); PF13923.6(zf-C3HC4_2:Zinc finger, C3HC4 type (RING finger)); PF14634.6(zf-RING_5:zinc-RING finger domain); PF13445.6(zf-RING_UBOX:RING-type zinc-finger); PF00097.25(zf-C3HC4:Zinc finger, C3HC4 ty…	sp|O13747|EPT1_SCHPO(RING finger protein ETP1 homolog OS=Schizosaccharomyces pombe (strain 972 / ATCC 24843) OX=284812 GN=SPAC16E8.13 PE=3 SV=1)
102957	estExt_Genewise1Plus.C_220046	hypothetical protein	2829	1.74846	Up	7.82048e-05	ENOG410ZS2W(S:Function unknown); ENOG410Z6VZ(S:Function unknown)	ENOG410ZS2W(-); ENOG410Z6VZ(-)	PF10528.9(GLEYA:GLEYA domain)
10343	gm1.5899_g	hypothetical protein	2214	1.74783	Up	3.46188e-24	ENOG4111TS2(S:Function unknown)	ENOG4111TS2(Transcription factor)	PF04082.18(Fungal_trans:Fungal specific transcription factor domain); PF00172.18(Zn_clus:Fungal Zn(2)-Cys(6) binuclear cluster domain)	sp|P40467|ASG1_YEAST(Activator of stress genes 1 OS=Saccharomyces cerevisiae (strain ATCC 204508 / S288c) OX=559292 GN=ASG1 PE=1 SV=1)
75088	e_gw1.4.899.1	Voltage-gated potassium channel	2112	1.74607	Up	1.05602e-09	COG1226(P:Inorganic ion transport and metabolism)	COG1226(PotAssium voltage-gated channel)	PF07885.16(Ion_trans_2:Ion channel); PF00520.31(Ion_trans:Ion transport protein)	sp|P40310|TOK1_YEAST(Outward-rectifier potassium channel TOK1 OS=Saccharomyces cerevisiae (strain ATCC 204508 / S288c) OX=559292 GN=TOK1 PE=1 SV=1)
82343	e_gw1.12.440.1	phospholipid-translocating P-type ATPase domain-containing protein	4605	1.74487	Up	2.10536e-293	COG0474(S:Function unknown)	COG0474(-)	PF16212.5(PhoLip_ATPase_C:Phospholipid-translocating P-type ATPase C-terminal); PF16209.5(PhoLip_ATPase_N:Phospholipid-translocating ATPase N-terminal); PF13246.6(Cation_ATPase:Cation transport ATPase (P-type)); PF00702.26(Hydrolase:haloacid dehalogenase-like hydrolase); PF00122.20(E1-E2_ATPase:E1-E2 ATPase)	sp|P32660|ATC5_YEAST(Phospholipid-transporting ATPase DNF1 OS=Saccharomyces cerevisiae (strain ATCC 204508 / S288c) OX=559292 GN=DNF1 PE=1 SV=2)
137575	estExt_fgenesh1_pm.C_110063	hypothetical protein	726	1.74479	Up	5.19042e-31	COG3542(S:Function unknown)	COG3542(Cupin superfamily (DUF985))	PF06172.11(Cupin_5:Cupin superfamily (DUF985))	sp|Q03629|YMH9_YEAST(Uncharacterized protein YML079W OS=Saccharomyces cerevisiae (strain ATCC 204508 / S288c) OX=559292 GN=YML079W PE=1 SV=1)
7294	gm1.2850_g	hypothetical protein	2496	1.74454	Up	7.82048e-05	ENOG4111A4R(K:Transcription); ENOG4111HUK(S:Function unknown)	ENOG4111A4R(Fungal specific transcription factor domain); ENOG4111HUK(C6 transcription factor)	PF04082.18(Fungal_trans:Fungal specific transcription factor domain); PF00172.18(Zn_clus:Fungal Zn(2)-Cys(6) binuclear cluster domain)	sp|B8NJG9|LEPE_ASPFN(Transcription factor lepE OS=Aspergillus flavus (strain ATCC 200026 / FGSC A1120 / NRRL 3357 / JCM 12722 / SRRC 167) OX=332952 GN=lepB PE=3 SV=1)
91970	e_gw1.36.98.1	hypothetical protein	1152	1.74373	Up	1.78423e-05	ENOG4111N9G(S:Function unknown)	ENOG4111N9G(Signal transducer)	PF05764.13(YL1:YL1 nuclear protein); PF08265.11(YL1_C:YL1 nuclear protein C-terminal domain)	sp|Q9P790|VPS72_SCHPO(SWR complex protein 2 OS=Schizosaccharomyces pombe (strain 972 / ATCC 24843) OX=284812 GN=swc2 PE=1 SV=1)
78507	e_gw1.7.744.1	arylsulfatase	1821	1.74091	Up	0.00013187	COG3119(P:Inorganic ion transport and metabolism)	COG3119(Sulfatase)	PF00884.23(Sulfatase:Sulfatase)	sp|Q10723|ARS_VOLCA(Arylsulfatase OS=Volvox carteri OX=3067 PE=1 SV=1)
122856	estExt_fgenesh2_kg.C_60065	expressed protein	891	1.74082	Up	0	ENOG4112AFQ(S:Function unknown)	ENOG4112AFQ(-)	PF01284.23(MARVEL:Membrane-associating domain)
124358	estExt_fgenesh2_kg.C_180030	expressed protein	782	1.7407	Up	7.82048e-05
34476	fgenesh1_pg.6_#_51	hypothetical protein	2523	1.74059	Up	7.4596e-19	ENOG410YG7T(K:Transcription); ENOG410XS5J(S:Function unknown)	ENOG410YG7T(Fungal Zn(2)-Cys(6) binuclear cluster domain); ENOG410XS5J(prolyl 4-hydroxylase)	PF04082.18(Fungal_trans:Fungal specific transcription factor domain); PF00172.18(Zn_clus:Fungal Zn(2)-Cys(6) binuclear cluster domain)	sp|Q1ERI1|CTNR_MONPU(Citrinin biosynthesis transcriptional activator ctnR OS=Monascus purpureus OX=5098 GN=ctnR PE=3 SV=1)
55770	gw1.17.334.1	SET domain-containing protein	1425	1.73909	Up	1.89087e-08	ENOG4111Y3G(S:Function unknown); ENOG410Y7DR(S:Function unknown)	ENOG4111Y3G(set domain protein); ENOG410Y7DR(set domain protein)	PF00856.28(SET:SET domain)	sp|O74738|SET10_SCHPO(Ribosomal lysine N-methyltransferase set10 OS=Schizosaccharomyces pombe (strain 972 / ATCC 24843) OX=284812 GN=set10 PE=3 SV=1)
118092	fgenesh2_kg.4_#_24_#_gi|38140887|gb|CF886205.1|CF886205	expressed protein	655	1.73819	Up	7.82048e-05
127981	fgenesh1_pm.3_#_570	NAD-binding Rossmann fold oxidoreductase	1032	1.73805	Up	0	COG0673(S:Function unknown)	COG0673(-)	PF01408.22(GFO_IDH_MocA:Oxidoreductase family, NAD-binding Rossmann fold); PF02894.17(GFO_IDH_MocA_C:Oxidoreductase family, C-terminal alpha/beta domain)	sp|Q04869|YM94_YEAST(Uncharacterized protein YMR315W OS=Saccharomyces cerevisiae (strain ATCC 204508 / S288c) OX=559292 GN=YMR315W PE=1 SV=1)
82993	e_gw1.13.201.1	hypothetical protein	4515	1.73775	Up	2.27838e-22	ENOG410XS52(K:Transcription)	ENOG410XS52(TAF2 RNA polymerase II, TATA box binding protein (TBP)-associated factor)	PF01433.20(Peptidase_M1:Peptidase family M1 domain)	sp|P87121|TAF2_SCHPO(Transcription initiation factor TFIID subunit 2 OS=Schizosaccharomyces pombe (strain 972 / ATCC 24843) OX=284812 GN=taf2 PE=3 SV=3)
109361	estExt_Genewise1.C_6_t10265	NAD(P) transhydrogenase precursor	3655	1.73602	Up	0	COG3288(C:Energy production and conversion)	COG3288(The transhydrogenation between NADH and NADP is coupled to respiration and ATP hydrolysis and functions as a proton pump across the membrane (By similarity))	PF02233.16(PNTB:NAD(P) transhydrogenase beta subunit); PF01262.21(AlaDh_PNT_C:Alanine dehydrogenase/PNT, C-terminal domain); PF05222.15(AlaDh_PNT_N:Alanine dehydrogenase/PNT, N-terminal domain); PF12769.7(PNTB_4TM:4TM region of pyridine nucleotide transhydrogenase, mitoch)	sp|Q13423|NNTM_HUMAN(NAD(P) transhydrogenase, mitochondrial OS=Homo sapiens OX=9606 GN=NNT PE=1 SV=3)
6596	gm1.2152_g	hypothetical protein	2106	1.73599	Up	4.4622e-09	ENOG4111IGB(S:Function unknown)	ENOG4111IGB(-)	PF00520.31(Ion_trans:Ion transport protein); PF08016.12(PKD_channel:Polycystin cation channel)
12013	gm1.7569_g	dihydrofolate synthetase Fol3	2088	1.73523	Up	5.8764e-65	COG0285(S:Function unknown)	COG0285(DUF218 domain protein)	PF08245.12(Mur_ligase_M:Mur ligase middle domain)	sp|Q9UTD0|FOLD_SCHPO(Probable dihydrofolate synthetase OS=Schizosaccharomyces pombe (strain 972 / ATCC 24843) OX=284812 GN=fol3 PE=3 SV=1)
133690	fgenesh1_pm.26_#_36	hypothetical protein	966	1.73436	Up	3.66126e-49	ENOG4111HH6(S:Function unknown)	ENOG4111HH6(UBX domain protein)	PF00627.31(UBA:UBA/TS-N domain); PF00789.20(UBX:UBX domain)
104620	estExt_Genewise1Plus.C_350119	ctr copper transporter family protein	738	1.73196	Up	9.39458e-63	ENOG4111I8D(S:Function unknown)	ENOG4111I8D(-)	PF04145.15(Ctr:Ctr copper transporter family)	sp|P38865|CTR2_YEAST(Copper transport protein CTR2 OS=Saccharomyces cerevisiae (strain ATCC 204508 / S288c) OX=559292 GN=CTR2 PE=1 SV=1)
103697	estExt_Genewise1Plus.C_260358	GTP cyclohydrolase-2	1243	1.73124	Up	3.21666e-43	COG0807(S:Function unknown)	COG0807(-)	PF00925.20(GTP_cyclohydro2:GTP cyclohydrolase II)	sp|Q9P7M9|RIB1_SCHPO(Probable GTP cyclohydrolase-2 OS=Schizosaccharomyces pombe (strain 972 / ATCC 24843) OX=284812 GN=rib1 PE=3 SV=1)
97054	estExt_Genewise1Plus.C_4_t20387	P-loop containing nucleoside triphosphate hydrolase protein	4200	1.73118	Up	1.50335e-63	COG1132(S:Function unknown)	COG1132(FYVE zinc finger protein)	PF00664.23(ABC_membrane:ABC transporter transmembrane region); PF00005.27(ABC_tran:ABC transporter); PF02463.19(SMC_N:RecF/RecN/SMC N terminal domain); PF03193.16(RsgA_GTPase:RsgA GTPase); PF13555.6(AAA_29:P-loop containing region of AAA domain)	sp|S0EGU4|BEA3_GIBF5(ABC transporter BEA3 OS=Gibberella fujikuroi (strain CBS 195.34 / IMI 58289 / NRRL A-6831) OX=1279085 GN=BEA3 PE=2 SV=1)
100846	estExt_Genewise1Plus.C_13_t10430	Piwi-domain containing protein	3105	1.72893	Up	4.00742e-26	ENOG410XP07(S:Function unknown)	ENOG410XP07(HET domain protein)	PF02171.17(Piwi:Piwi domain); PF16488.5(ArgoL2:Argonaute linker 2 domain); PF08699.10(ArgoL1:Argonaute linker 1 domain); PF16486.5(ArgoN:N-terminal domain of argonaute); PF02170.22(PAZ:PAZ domain); PF16487.5(ArgoMid:Mid domain of argonaute)	sp|Q69VD5|PNH1_ORYSJ(Protein argonaute PNH1 OS=Oryza sativa subsp. japonica OX=39947 GN=PHN1 PE=2 SV=1)
53248	gw1.3.800.1	hypothetical protein	1401	1.72886	Up	8.7734e-22	ENOG410Y7SY(S:Function unknown)	ENOG410Y7SY(C6 finger domain protein)	PF00172.18(Zn_clus:Fungal Zn(2)-Cys(6) binuclear cluster domain)
84874	e_gw1.16.44.1	Kynureninase	1470	1.72818	Up	1.90812e-12	COG3844(E:Amino acid transport and metabolism)	COG3844(Catalyzes the cleavage of L-kynurenine (L-Kyn) and L-3- hydroxykynurenine (L-3OHKyn) into anthranilic acid (AA) and 3- hydroxyanthranilic acid (3-OHAA), respectively (By similarity))	PF00266.19(Aminotran_5:Aminotransferase class-V)	sp|Q7S332|KYNU1_NEUCR(Kynureninase 1 OS=Neurospora crassa (strain ATCC 24698 / 74-OR23-1A / CBS 708.71 / DSM 1257 / FGSC 987) OX=367110 GN=kyn-1 PE=3 SV=1)
82828	e_gw1.13.240.1	Thioredoxin-like protein	738	1.72658	Up	4.64304e-05	COG2761(P:Inorganic ion transport and metabolism)	COG2761(H( )-stimulated, divalent metal cation uptake system (By similarity))	PF01323.20(DSBA:DSBA-like thioredoxin domain)
72237	e_gw1.2.1310.1	Thioredoxin-like protein	708	1.72518	Up	6.86256e-09	COG3917(Q:Secondary metabolites biosynthesis, transport and catabolism)	COG3917(dsbA oxidoreductase)	PF01323.20(DSBA:DSBA-like thioredoxin domain)	sp|Q09652|GSTK1_CAEEL(Glutathione S-transferase kappa 1 OS=Caenorhabditis elegans OX=6239 GN=gstk-1 PE=3 SV=1)
132981	fgenesh1_pm.21_#_57	hypothetical protein	495	1.72466	Up	9.7968e-10	COG0494(O:Posttranslational modification, protein turnover, chaperones)	COG0494(May conjugate Arg from its aminoacyl-tRNA to the N- termini of proteins containing an N-terminal aspartate or glutamate)	PF00293.28(NUDIX:NUDIX domain)	sp|Q09790|APS1_SCHPO(Diphosphoinositol polyphosphate phosphohydrolase aps1 OS=Schizosaccharomyces pombe (strain 972 / ATCC 24843) OX=284812 GN=aps1 PE=1 SV=1)
76559	e_gw1.6.52.1	hypothetical protein	1320	1.72413	Up	1.06299e-18	ENOG410YREH(S:Function unknown); ENOG410XUE9(S:Function unknown)	ENOG410YREH(-); ENOG410XUE9(-)
127053	fgenesh1_pm.2_#_378	Adaptor protein complex%2C beta subunit	2148	1.72174	Up	6.5748e-51	COG5096(S:Function unknown)	COG5096(Conserved hypothetical, protein)	PF01602.20(Adaptin_N:Adaptin N terminal region); PF12717.7(Cnd1:non-SMC mitotic condensation complex subunit 1); PF13646.6(HEAT_2:HEAT repeats); PF02985.22(HEAT:HEAT repeat)	sp|Q9SUS3|APBLB_ARATH(Beta-adaptin-like protein B OS=Arabidopsis thaliana OX=3702 GN=BETAB-AD PE=1 SV=1)
69637	e_gw1.1.494.1	HIT-like protein	972	1.72168	Up	6.86256e-09	ENOG41102F4(S:Function unknown)	ENOG41102F4(DNA-binding protein involved in single-strand DNA break repair, double-strand DNA break repair and base excision repair. Resolves abortive DNA ligation intermediates formed either at base excision sites, or when DNA ligases attempt to repair non- ligatable breaks induced by reactive oxygen species. Catalyzes the release of adenylate groups covalently linked to 5'-phosphate termini, re…	PF16278.5(zf-C2HE:C2HE / C2H2 / C2HC zinc-binding finger); PF11969.8(DcpS_C:Scavenger mRNA decapping enzyme C-term binding); PF01230.23(HIT:HIT domain)	sp|Q08702|APTX_YEAST(Aprataxin-like protein OS=Saccharomyces cerevisiae (strain ATCC 204508 / S288c) OX=559292 GN=HNT3 PE=1 SV=1)
73905	e_gw1.4.727.1	proline iminopeptidase	1449	1.72156	Up	1.04099e-24	COG0596(O:Posttranslational modification, protein turnover, chaperones)	COG0596(DNAj domain protein)	PF00561.20(Abhydrolase_1:alpha/beta hydrolase fold); PF12146.8(Hydrolase_4:Serine aminopeptidase, S33)	sp|P46547|PIP_AERSO(Proline iminopeptidase OS=Aeromonas sobria OX=646 GN=pip PE=1 SV=3)
75405	e_gw1.5.314.1	aspartic endopeptidase	1359	1.72084	Up	8.9079e-53	ENOG410XNV7(S:Function unknown)	ENOG410XNV7(Transcription factor)	PF00026.23(Asp:Eukaryotic aspartyl protease); PF14543.6(TAXi_N:Xylanase inhibitor N-terminal); PF13650.6(Asp_protease_2:Aspartyl protease)	sp|A0A146F0J0|PEPA_ASPPE(Aspergillopepsin-1 OS=Aspergillus pseudoglaucus OX=1405805 GN=pepA PE=1 SV=1)
6272	gm1.1828_g	cell division control protein Cdc6	1842	1.72055	Up	1.67591e-13	COG1474(T:Signal transduction mechanisms)	COG1474(tspo and mbr like protein)	PF13401.6(AAA_22:AAA domain); PF13191.6(AAA_16:AAA ATPase domain); PF00004.29(AAA:ATPase family associated with various cellular activities (AAA)); PF09079.11(Cdc6_C:CDC6, C terminal winged helix domain); PF17872.1(AAA_lid_10:AAA lid domain); PF13604.6(AAA_30:AAA domain); PF13245.6(AAA_19:AAA domain); PF00931.22(NB-ARC:NB-ARC domain); PF07693.14(KAP_NTPase:KAP family P-loop domain); PF05621.11(Tn…	sp|P41411|CDC18_SCHPO(Cell division control protein 18 OS=Schizosaccharomyces pombe (strain 972 / ATCC 24843) OX=284812 GN=cdc18 PE=1 SV=1)
38839	fgenesh1_pg.27_#_56	hypothetical protein	3495	1.71989	Up	0.000347126	ENOG4110XF2(S:Function unknown); ENOG410Y987(S:Function unknown)	ENOG4110XF2(-); ENOG410Y987(-)
74396	e_gw1.4.480.1	hypothetical protein	1311	1.71774	Up	1.23676e-07	ENOG4112B8V(S:Function unknown)	ENOG4112B8V(-)
33948	fgenesh1_pg.4_#_295	smr domain-containing protein	2145	1.71745	Up	1.50585e-37	ENOG41101K4(S:Function unknown); ENOG410Y9RS(S:Function unknown)	ENOG41101K4(NEDD4 binding protein); ENOG410Y9RS(CCCH zinc finger and SMR)	PF08590.10(DUF1771:Domain of unknown function (DUF1771)); PF18345.1(zf_CCCH_4:Zinc finger domain); PF01713.21(Smr:Smr domain); PF00642.24(zf-CCCH:Zinc finger C-x8-C-x5-C-x3-H type (and similar)); PF18044.1(zf-CCCH_4:CCCH-type zinc finger)	sp|O64843|CID7_ARATH(Polyadenylate-binding protein-interacting protein 7 OS=Arabidopsis thaliana OX=3702 GN=CID7 PE=1 SV=1)
77308	e_gw1.6.227.1	NAD(P)-binding protein	768	1.71677	Up	1.83476e-22	ENOG4111VKY(G:Carbohydrate transport and metabolism)	ENOG4111VKY(chitinase)	PF00106.25(adh_short:short chain dehydrogenase); PF13561.6(adh_short_C2:Enoyl-(Acyl carrier protein) reductase); PF08659.10(KR:KR domain)	sp|G4N292|RED3_MAGO7(Short-chain dehydrogenase RED3 OS=Magnaporthe oryzae (strain 70-15 / ATCC MYA-4617 / FGSC 8958) OX=242507 GN=RED3 PE=2 SV=1)
39197	fgenesh1_pg.30_#_87	hypothetical protein	726	1.71518	Up	4.05546e-42	ENOG410Y2P4(S:Function unknown); ENOG4111PE4(S:Function unknown); ENOG41118I6(S:Function unknown)	ENOG410Y2P4(-); ENOG4111PE4(glutathione Stransferase); ENOG41118I6(-)	PF13417.6(GST_N_3:Glutathione S-transferase, N-terminal domain); PF13409.6(GST_N_2:Glutathione S-transferase, N-terminal domain)	sp|B8NM79|USTS_ASPFN(Glutathione S-transferase-like protein ustS OS=Aspergillus flavus (strain ATCC 200026 / FGSC A1120 / NRRL 3357 / JCM 12722 / SRRC 167) OX=332952 GN=ustS PE=1 SV=2)
137314	estExt_fgenesh1_pm.C_90124	hypothetical protein	1153	1.71342	Up	1.22322e-11	ENOG4111DSE(S:Function unknown)	ENOG4111DSE(-)
11734	gm1.7290_g	General substrate transporter	1581	1.71259	Up	1.30534e-15	ENOG410XNQK(S:Function unknown)	ENOG410XNQK(-)	PF00083.24(Sugar_tr:Sugar (and other) transporter); PF07690.16(MFS_1:Major Facilitator Superfamily)	sp|A1CPX0|QUTD_ASPCL(Probable quinate permease OS=Aspergillus clavatus (strain ATCC 1007 / CBS 513.65 / DSM 816 / NCTC 3887 / NRRL 1) OX=344612 GN=qutD PE=3 SV=1)
103902	estExt_Genewise1Plus.C_280061	hypothetical protein	5450	1.71244	Up	3.38496e-58	ENOG4111TK5(K:Transcription)	ENOG4111TK5(transcription initiation factor complex)	PF04182.12(B-block_TFIIIC:B-block binding subunit of TFIIIC)
93472	e_gw1.53.7.1	hypothetical protein	717	1.71081	Up	1.90112e-21	COG0179(Q:Secondary metabolites biosynthesis, transport and catabolism)	COG0179(Fumarylacetoacetate hydrolase)	PF01557.18(FAA_hydrolase:Fumarylacetoacetate (FAA) hydrolase family)	sp|Q9P7L4|YOS9_SCHPO(Uncharacterized hydrolase C21C3.09c OS=Schizosaccharomyces pombe (strain 972 / ATCC 24843) OX=284812 GN=SPBC21C3.09c PE=3 SV=1)
25182	estExt_Genemark1.C_100200	Frataxin	813	1.71065	Up	4.24372e-73	COG1965(P:Inorganic ion transport and metabolism)	COG1965(frataxin-like protein)	PF01491.16(Frataxin_Cyay:Frataxin-like domain)	sp|Q9W385|FRDA_DROME(Frataxin homolog, mitochondrial OS=Drosophila melanogaster OX=7227 GN=fh PE=2 SV=1)
129024	fgenesh1_pm.6_#_158	ketoacyl-synt-domain containing protein	7248	1.7091	Up	1.24605e-21	COG3321(Q:Secondary metabolites biosynthesis, transport and catabolism); ENOG410XNPJ(Q:Secondary metabolites biosynthesis, transport and catabolism)	COG3321(synthase); ENOG410XNPJ(polyketide synthase)	PF00109.26(ketoacyl-synt:Beta-ketoacyl synthase, N-terminal domain); PF00698.21(Acyl_transf_1:Acyl transferase domain); PF14765.6(PS-DH:Polyketide synthase dehydratase); PF02801.22(Ketoacyl-synt_C:Beta-ketoacyl synthase, C-terminal domain); PF08659.10(KR:KR domain); PF08242.12(Methyltransf_12:Methyltransferase domain); PF00107.26(ADH_zinc_N:Zinc-binding dehydrogenase); PF13489.6(Methyltransf_23:M…	sp|Q5BA83|EASB_EMENI(Highly reducing polyketide synthase easB OS=Emericella nidulans (strain FGSC A4 / ATCC 38163 / CBS 112.46 / NRRL 194 / M139) OX=227321 GN=easB PE=3 SV=1)
78283	e_gw1.7.1157.1	Cytochrome P450	1701	1.70655	Up	7.42764e-08	COG2124(S:Function unknown)	COG2124(FAD FMN-containing isoamyl alcohol oxidase MreA)	PF00067.22(p450:Cytochrome P450)	sp|Q6UEG2|AFLN_ASPPU(Cytochrome P450 monooxygenase aflN OS=Aspergillus parasiticus (strain ATCC 56775 / NRRL 5862 / SRRC 143 / SU-1) OX=1403190 GN=aflN PE=3 SV=1)
105095	estExt_Genewise1Plus.C_430045	Purine and uridine phosphorylase	1099	1.70584	Up	9.3978e-14	COG0775(S:Function unknown)	COG0775(Ankyrin Repeat)	PF01048.20(PNP_UDP_1:Phosphorylase superfamily)
136466	estExt_fgenesh1_pm.C_40321	hypothetical protein	1143	1.70548	Up	6.47374e-13	ENOG410YYZR(S:Function unknown)	ENOG410YYZR(Conserved hypothetical, protein)
12213	gm1.7769_g	mitochondrial chaperone BCS1	1425	1.70497	Up	4.35886e-39	COG0465(S:Function unknown)	COG0465((VPS9) domain protein)	PF08740.11(BCS1_N:BCS1 N terminal); PF00004.29(AAA:ATPase family associated with various cellular activities (AAA)); PF12775.7(AAA_7:P-loop containing dynein motor region)	sp|P32839|BCS1_YEAST(Mitochondrial chaperone BCS1 OS=Saccharomyces cerevisiae (strain ATCC 204508 / S288c) OX=559292 GN=BCS1 PE=1 SV=2)
78541	e_gw1.7.188.1	hypothetical protein	2088	1.70288	Up	1.50965e-34	ENOG4111FD5(S:Function unknown)	ENOG4111FD5(Fungal specific transcription factor domain)	PF04082.18(Fungal_trans:Fungal specific transcription factor domain); PF00172.18(Zn_clus:Fungal Zn(2)-Cys(6) binuclear cluster domain)	sp|P52958|CTF1A_FUSSO(Cutinase transcription factor 1 alpha OS=Fusarium solani subsp. pisi OX=70791 GN=CTF1-ALPHA PE=2 SV=1)
99214	estExt_Genewise1Plus.C_9_t10165	adenylylsulfate kinase	901	1.70251	Up	9.72322e-97	COG0529(P:Inorganic ion transport and metabolism)	COG0529(Catalyzes the synthesis of activated sulfate (By similarity))	PF01583.20(APS_kinase:Adenylylsulphate kinase); PF13671.6(AAA_33:AAA domain); PF13238.6(AAA_18:AAA domain)	sp|Q9C2Y6|KAPS_SACPS(Adenylyl-sulfate kinase OS=Saccharomyces pastorianus OX=27292 GN=MET14 PE=3 SV=1)
109892	estExt_Genewise1.C_7_t10329	Mitochondrial glycoprotein	1155	1.70145	Up	1.49222e-197	ENOG4111MS5(S:Function unknown)	ENOG4111MS5(Mitochondrial glycoprotein family protein)	PF02330.16(MAM33:Mitochondrial glycoprotein)	sp|P40513|MAM33_YEAST(Mitochondrial acidic protein MAM33 OS=Saccharomyces cerevisiae (strain ATCC 204508 / S288c) OX=559292 GN=MAM33 PE=1 SV=1)
10027	gm1.5583_g	putative siroheme synthase	1821	1.69953	Up	1.56062e-57	COG1648(H:Coenzyme transport and metabolism)	COG1648(Multifunctional enzyme that catalyzes the SAM-dependent methylation of uroporphyrinogen III at position C-2 and C-7 to form precorrin-2 and then position C-12 or C-18 to form trimethylpyrrocorphin 2. It also catalyzes the conversion of precorrin-2 into siroheme. This reaction consists of the NAD- dependent oxidation of precorrin-2 into sirohydrochlorin and its subsequent ferrochelation in…	PF00590.20(TP_methylase:Tetrapyrrole (Corrin/Porphyrin) Methylases); PF13241.6(NAD_binding_7:Putative NAD(P)-binding); PF14824.6(Sirohm_synth_M:Sirohaem biosynthesis protein central); PF14823.6(Sirohm_synth_C:Sirohaem biosynthesis protein C-terminal)	sp|P36150|SUMT_YEAST(Uroporphyrinogen-III C-methyltransferase OS=Saccharomyces cerevisiae (strain ATCC 204508 / S288c) OX=559292 GN=MET1 PE=1 SV=1)
88409	e_gw1.23.247.1	5-oxoprolinase	3867	1.6979	Up	2.36972e-13	COG0146(E:Amino acid transport and metabolism); COG0146(Q:Secondary metabolites biosynthesis, transport and catabolism)	COG0146(5-oxoprolinase); COG0146(5-oxoprolinase)	PF02538.14(Hydantoinase_B:Hydantoinase B/oxoprolinase); PF01968.18(Hydantoinase_A:Hydantoinase/oxoprolinase); PF05378.13(Hydant_A_N:Hydantoinase/oxoprolinase N-terminal region)	sp|Q10094|YAOF_SCHPO(Uncharacterized protein C11D3.15 OS=Schizosaccharomyces pombe (strain 972 / ATCC 24843) OX=284812 GN=SPAC11D3.15 PE=3 SV=1)
45556	gw1.1.654.1	DUF1183-domain containing protein	867	1.69765	Up	2.08528e-14	ENOG4111IKY(U:Intracellular trafficking, secretion, and vesicular transport)	ENOG4111IKY(transmembrane protein 66)	PF06682.12(SARAF:SOCE-associated regulatory factor of calcium homoeostasis)	sp|Q0IHF9|SARAF_XENLA(Store-operated calcium entry-associated regulatory factor OS=Xenopus laevis OX=8355 GN=saraf PE=2 SV=2)
105408	estExt_Genewise1.C_1_t10261	expressed protein	854	1.69723	Up	5.83796e-165	ENOG410XZCF(S:Function unknown)	ENOG410XZCF(Involved in the selective degradation of mitochondria via autophagy during starvation and at post-log phase (By similarity))	PF08592.11(DUF1772:Domain of unknown function (DUF1772))	sp|I1RAL7|ATG33_GIBZE(Autophagy-related protein 33 OS=Gibberella zeae (strain PH-1 / ATCC MYA-4620 / FGSC 9075 / NRRL 31084) OX=229533 GN=ATG33 PE=3 SV=1)
112341	estExt_Genewise1.C_13_t10190	hypothetical protein	2666	1.69608	Up	8.25606e-41	ENOG410ZM57(S:Function unknown)	ENOG410ZM57(Metallophosphoesterase 1)	PF00149.28(Metallophos:Calcineurin-like phosphoesterase)	sp|P40986|CDC1_YEAST(Cell division control protein 1 OS=Saccharomyces cerevisiae (strain ATCC 204508 / S288c) OX=559292 GN=CDC1 PE=1 SV=2)
71982	e_gw1.2.621.1	hypothetical protein	483	1.69485	Up	7.1682e-05	ENOG4112BI3(S:Function unknown); ENOG410XZWD(S:Function unknown)	ENOG4112BI3(Ribonuclease H2 non-catalytic subunit (Ylr154p-like)); ENOG410XZWD(Ribonuclease H2 non-catalytic subunit (Ylr154p-like))	PF08615.11(RNase_H2_suC:Ribonuclease H2 non-catalytic subunit (Ylr154p-like))
103600	estExt_Genewise1Plus.C_260094	hypothetical protein	1615	1.69479	Up	1.1116e-42	ENOG410YSRR(S:Function unknown)	ENOG410YSRR(Conserved hypothetical, protein)	PF10303.9(DUF2408:Protein of unknown function (DUF2408))	sp|Q9P6K3|YLF8_SCHPO(UPF0662 protein C30C2.08 OS=Schizosaccharomyces pombe (strain 972 / ATCC 24843) OX=284812 GN=SPAC30C2.08 PE=3 SV=1)
38574	fgenesh1_pg.25_#_16	FAD/NAD(P)-binding domain-containing protein	1287	1.69364	Up	2.396e-22	COG0654(I:Lipid transport and metabolism)	COG0654(alpha beta hydrolase fold-3 domain protein)	PF01494.19(FAD_binding_3:FAD binding domain); PF13450.6(NAD_binding_8:NAD(P)-binding Rossmann-like domain); PF00890.24(FAD_binding_2:FAD binding domain); PF07992.14(Pyr_redox_2:Pyridine nucleotide-disulphide oxidoreductase); PF01266.24(DAO:FAD dependent oxidoreductase); PF12831.7(FAD_oxidored:FAD dependent oxidoreductase)	sp|Q3S4B7|3HBH_POLNA(3-hydroxybenzoate 6-hydroxylase OS=Polaromonas naphthalenivorans (strain CJ2) OX=365044 GN=nagX PE=1 SV=1)
84762	e_gw1.16.237.1	hypothetical protein	4473	1.69272	Up	4.07394e-27	ENOG410ZPNB(S:Function unknown)	ENOG410ZPNB(Conserved hypothetical, protein)
134327	fgenesh1_pm.31_#_41	putative carbonic anhydrase	492	1.69219	Up	1.98283e-10	COG0288(S:Function unknown)	COG0288(-)	PF00484.19(Pro_CA:Carbonic anhydrase)	sp|P9WPJ6|MTCA1_MYCTO(Beta-carbonic anhydrase 1 OS=Mycobacterium tuberculosis (strain CDC 1551 / Oshkosh) OX=83331 GN=mtcA1 PE=3 SV=1)
74444	e_gw1.4.1039.1	DNA repair protein RAD5	3402	1.68976	Up	5.97366e-13	ENOG410XQ1S(L:Replication, recombination and repair)	ENOG410XQ1S(helicase, member of the UBC2 RAD6 epistasis group. Functions with DNA repair protein RAD18 in error-free postreplication DNA repair. Involved in the maintenance of wild- type rates of instability of simple repetitive sequences such as poly(GT) repeats. Seems to be involved in maintaining a balance which acts in favor of error-prone non-homologous joining during DNA double-strand break…	PF00176.23(SNF2_N:SNF2 family N-terminal domain); PF08797.11(HIRAN:HIRAN domain); PF00271.31(Helicase_C:Helicase conserved C-terminal domain); PF04851.15(ResIII:Type III restriction enzyme, res subunit); PF13920.6(zf-C3HC4_3:Zinc finger, C3HC4 type (RING finger)); PF14555.6(UBA_4:UBA-like domain); PF13923.6(zf-C3HC4_2:Zinc finger, C3HC4 type (RING finger))	sp|Q4IJ84|RAD5_GIBZE(DNA repair protein RAD5 OS=Gibberella zeae (strain PH-1 / ATCC MYA-4620 / FGSC 9075 / NRRL 31084) OX=229533 GN=RAD5 PE=3 SV=1)
88073	e_gw1.22.122.1	hypothetical protein	771	1.68946	Up	7.1682e-05	COG0500(S:Function unknown); ENOG4111PIY(S:Function unknown)	COG0500(CADG); ENOG4111PIY(Putative methyltransferase)	PF10294.9(Methyltransf_16:Lysine methyltransferase); PF13847.6(Methyltransf_31:Methyltransferase domain)	sp|P53970|EFM6_YEAST(Protein-lysine N-methyltransferase EFM6 OS=Saccharomyces cerevisiae (strain ATCC 204508 / S288c) OX=559292 GN=EFM6 PE=1 SV=1)
9065	gm1.4621_g	hypothetical protein	1734	1.68922	Up	3.61198e-13	ENOG4112D2W(S:Function unknown)	ENOG4112D2W(Conserved hypothetical, protein)	PF13094.6(CENP-Q:CENP-Q, a CENPA-CAD centromere complex subunit)
76207	e_gw1.5.607.1	hypothetical protein	1362	1.68917	Up	0.000538244	ENOG410XU18(S:Function unknown); ENOG410Y7YI(S:Function unknown)	ENOG410XU18(Conserved hypothetical, protein); ENOG410Y7YI(-)	PF09995.9(DUF2236:Uncharacterized protein conserved in bacteria (DUF2236))
92948	e_gw1.44.47.1	hypothetical protein	1146	1.68899	Up	0.000538244	ENOG410Y7MP(S:Function unknown)	ENOG410Y7MP(-)
80145	e_gw1.9.47.1	hypothetical protein	2484	1.68846	Up	7.7237e-198	ENOG410XVU0(S:Function unknown)	ENOG410XVU0(Transcription factor)	PF04082.18(Fungal_trans:Fungal specific transcription factor domain)	sp|A0A089FQI6|PRLR_FUNXX(Pyrrolocin cluster transcription factor fsdR OS=Fungal sp. (strain NRRL 50135) OX=1547289 GN=prlR PE=3 SV=1)
80321	e_gw1.9.589.1	hypothetical protein	1473	1.68796	Up	1.28474e-18	ENOG410Z2NE(S:Function unknown)	ENOG410Z2NE(Conserved hypothetical, protein)
138668	estExt_fgenesh1_pm.C_210124	hypothetical protein	1438	1.6878	Up	1.13791e-07	ENOG411131I(S:Function unknown)	ENOG411131I(-)
124526	estExt_fgenesh2_kg.C_210002	TPA_inf: chitinase 18-5	1494	1.68762	Up	4.2495e-05	COG3325(S:Function unknown)	COG3325(WD domain, G-beta repeat)	PF00704.28(Glyco_hydro_18:Glycosyl hydrolases family 18)	sp|A6N6J0|CHI46_TRIHA(Endochitinase 46 OS=Trichoderma harzianum OX=5544 GN=chit46 PE=1 SV=1)
135480	estExt_fgenesh1_pm.C_1_t20054	Glutathione S-transferase%2C C-terminal-like protein	870	1.68725	Up	1.38267e-09	ENOG410XSIX(S:Function unknown)	ENOG410XSIX(Family with sequence similarity 50, member)	PF13409.6(GST_N_2:Glutathione S-transferase, N-terminal domain); PF13417.6(GST_N_3:Glutathione S-transferase, N-terminal domain); PF02798.20(GST_N:Glutathione S-transferase, N-terminal domain); PF13410.6(GST_C_2:Glutathione S-transferase, C-terminal domain); PF00043.25(GST_C:Glutathione S-transferase, C-terminal domain)	sp|Q9N1F5|GSTO1_PIG(Glutathione S-transferase omega-1 OS=Sus scrofa OX=9823 GN=GSTO1 PE=1 SV=2)
99143	estExt_Genewise1Plus.C_9_t10039	protein arginine N-methyltransferase	1725	1.68658	Up	6.7537e-16	ENOG410XQYH(S:Function unknown)	ENOG410XQYH(Protein arginine n-methyltransferase)	PF13649.6(Methyltransf_25:Methyltransferase domain); PF08241.12(Methyltransf_11:Methyltransferase domain); PF06325.13(PrmA:Ribosomal protein L11 methyltransferase (PrmA)); PF13847.6(Methyltransf_31:Methyltransferase domain); PF13489.6(Methyltransf_23:Methyltransferase domain); PF12847.7(Methyltransf_18:Methyltransferase domain); PF05175.14(MTS:Methyltransferase small domain); PF08242.12(Methyltra…	sp|O13648|ANM3_SCHPO(Ribosomal protein arginine N-methyltransferase rmt3 OS=Schizosaccharomyces pombe (strain 972 / ATCC 24843) OX=284812 GN=rmt3 PE=1 SV=3)
99938	estExt_Genewise1Plus.C_11_t10022	hypothetical protein	1199	1.6849	Up	8.32702e-10	ENOG410Y1JB(S:Function unknown)	ENOG410Y1JB(micro-fibrillar-associated protein)	PF06991.11(MFAP1:Microfibril-associated/Pre-mRNA processing)	sp|Q9P7H6|YLK3_SCHPO(Uncharacterized protein C1782.03 OS=Schizosaccharomyces pombe (strain 972 / ATCC 24843) OX=284812 GN=SPAC1782.03 PE=1 SV=1)
111122	estExt_Genewise1.C_9_t20272	hypothetical protein	3666	1.68478	Up	4.84662e-97	ENOG4111FC3(S:Function unknown)	ENOG4111FC3(HET-s LopB domain protein)	PF14479.6(HeLo:Prion-inhibition and propagation)
4914	gm1.470_g	TatD family hydrolase	1197	1.68416	Up	2.47804e-16	COG0084(S:Function unknown)	COG0084(CHL4 family chromosome segregation protein)	PF01026.21(TatD_DNase:TatD related DNase)	sp|Q9UUF1|YNF8_SCHPO(Deoxyribonuclease Tat-D OS=Schizosaccharomyces pombe (strain 972 / ATCC 24843) OX=284812 GN=pi038 PE=3 SV=1)
101089	estExt_Genewise1Plus.C_14_t10270	Nucleic acid-binding protein	1368	1.68392	Up	5.96246e-64	COG0073(J:Translation, ribosomal structure and biogenesis)	COG0073(Is required not only for elongation of protein synthesis but also for the initiation of all mRNA translation through initiator tRNA(fMet) aminoacylation (By similarity))	PF01588.20(tRNA_bind:Putative tRNA binding domain); PF00043.25(GST_C:Glutathione S-transferase, C-terminal domain)	sp|P46672|ARC1_YEAST(tRNA-aminoacylation cofactor ARC1 OS=Saccharomyces cerevisiae (strain ATCC 204508 / S288c) OX=559292 GN=ARC1 PE=1 SV=2)
137569	estExt_fgenesh1_pm.C_110051	DNA glycosylase	1089	1.68357	Up	5.55614e-32	COG0177(S:Function unknown)	COG0177(-)	PF00730.25(HhH-GPD:HhH-GPD superfamily base excision DNA repair protein); PF00633.23(HHH:Helix-hairpin-helix motif)	sp|C8VC05|NTH_EMENI(Endonuclease III homolog OS=Emericella nidulans (strain FGSC A4 / ATCC 38163 / CBS 112.46 / NRRL 194 / M139) OX=227321 GN=nth1 PE=3 SV=2)
82816	e_gw1.13.672.1	hypothetical protein	657	1.68286	Up	1.55283e-73	ENOG4112033(A:RNA processing and modification)	ENOG4112033(Cytochrome c oxidase subunit which plays a role in assembly of respiratory supercomplexes (By similarity))	PF04588.13(HIG_1_N:Hypoxia induced protein conserved region)	sp|C7YJ02|RCF1_NECH7(Respiratory supercomplex factor 1, mitochondrial OS=Nectria haematococca (strain 77-13-4 / ATCC MYA-4622 / FGSC 9596 / MPVI) OX=660122 GN=RCF1 PE=3 SV=1)
71180	e_gw1.2.1307.1	hypothetical protein	5565	1.68063	Up	1.7379e-19	ENOG410XQVG(S:Function unknown)	ENOG410XQVG(DEP domain containing 5)	PF12257.8(IML1:Vacuolar membrane-associated protein Iml1); PF00610.21(DEP:Domain found in Dishevelled, Egl-10, and Pleckstrin (DEP))	sp|Q7S9J6|IML1_NEUCR(Vacuolar membrane-associated protein iml1 OS=Neurospora crassa (strain ATCC 24698 / 74-OR23-1A / CBS 708.71 / DSM 1257 / FGSC 987) OX=367110 GN=iml1 PE=3 SV=1)
67862	e_gw1.1.2598.1	hypothetical protein	873	1.67979	Up	0.000316526	ENOG410Z4NQ(S:Function unknown)	ENOG410Z4NQ(-)	PF09428.10(DUF2011:Fungal protein of unknown function (DUF2011))
101069	estExt_Genewise1Plus.C_14_t10238	hypothetical protein	1229	1.67974	Up	1.44882e-295	COG5580(O:Posttranslational modification, protein turnover, chaperones)	COG5580(AHA1, activator of heat shock 90kDa protein ATPase homolog)	PF09229.11(Aha1_N:Activator of Hsp90 ATPase, N-terminal); PF08327.11(AHSA1:Activator of Hsp90 ATPase homolog 1-like protein)	sp|Q9P782|YNY8_SCHPO(Uncharacterized protein C1711.08 OS=Schizosaccharomyces pombe (strain 972 / ATCC 24843) OX=284812 GN=SPBC1711.08 PE=2 SV=1)
78942	e_gw1.8.316.1	family 4 glycosyltransferase	1500	1.67967	Up	9.0964e-13	COG0438(S:Function unknown)	COG0438(Mitogen-activated protein kinase binding protein 1)	PF08288.12(PIGA:PIGA (GPI anchor biosynthesis)); PF00534.20(Glycos_transf_1:Glycosyl transferases group 1); PF13439.6(Glyco_transf_4:Glycosyltransferase Family 4); PF13692.6(Glyco_trans_1_4:Glycosyl transferases group 1); PF13579.6(Glyco_trans_4_4:Glycosyl transferase 4-like domain); PF13477.6(Glyco_trans_4_2:Glycosyl transferase 4-like)	sp|P87172|GPI3_SCHPO(Phosphatidylinositol N-acetylglucosaminyltransferase gpi3 subunit OS=Schizosaccharomyces pombe (strain 972 / ATCC 24843) OX=284812 GN=gpi3 PE=3 SV=1)
132597	fgenesh1_pm.19_#_59	proteasome component PRE3 precursor	675	1.67933	Up	7.43832e-81	ENOG410XS23(O:Posttranslational modification, protein turnover, chaperones)	ENOG410XS23(The proteasome is a multicatalytic proteinase complex which is characterized by its ability to cleave peptides with Arg, Phe, Tyr, Leu, and Glu adjacent to the leaving group at neutral or slightly basic pH. The proteasome has an ATP-dependent proteolytic activity (By similarity))	PF00227.26(Proteasome:Proteasome subunit)	sp|P38624|PSB1_YEAST(Proteasome subunit beta type-1 OS=Saccharomyces cerevisiae (strain ATCC 204508 / S288c) OX=559292 GN=PRE3 PE=1 SV=2)
139410	estExt_fgenesh1_pm.C_380043	DNase I-like protein	1750	1.67829	Up	8.06932e-18	ENOG4111HPZ(S:Function unknown)	ENOG4111HPZ(endonuclease exonuclease phosphatase)	PF03372.23(Exo_endo_phos:Endonuclease/Exonuclease/phosphatase family)	sp|Q9GUC9|YFEF9_CAEEL(Uncharacterized protein F14F9.5 OS=Caenorhabditis elegans OX=6239 GN=F14F9.5 PE=1 SV=2)
87010	e_gw1.20.126.1	Cullin-domain containing protein	2388	1.67781	Up	2.2401e-57	COG5647(S:Function unknown)	COG5647(-)	PF00888.22(Cullin:Cullin family); PF10557.9(Cullin_Nedd8:Cullin protein neddylation domain)	sp|Q3TCH7|CUL4A_MOUSE(Cullin-4A OS=Mus musculus OX=10090 GN=Cul4a PE=1 SV=1)
25773	estExt_Genemark1.C_150176	multidrug resistance-associated protein 1	5159	1.67712	Up	3.81286e-211	COG1132(S:Function unknown)	COG1132(Conserved hypothetical, protein)	PF00664.23(ABC_membrane:ABC transporter transmembrane region); PF00005.27(ABC_tran:ABC transporter); PF02463.19(SMC_N:RecF/RecN/SMC N terminal domain)	sp|P39109|YCFI_YEAST(Metal resistance protein YCF1 OS=Saccharomyces cerevisiae (strain ATCC 204508 / S288c) OX=559292 GN=YCF1 PE=1 SV=2)
101067	estExt_Genewise1Plus.C_14_t10236	zf-DHHC-domain containing protein	1750	1.67686	Up	8.39634e-22	COG5273(S:Function unknown)	COG5273(transcription factor Rap1)	PF01529.20(DHHC:DHHC palmitoyltransferase)	sp|Q7RWM9|SWF1_NEUCR(Palmitoyltransferase SWF1 OS=Neurospora crassa (strain ATCC 24698 / 74-OR23-1A / CBS 708.71 / DSM 1257 / FGSC 987) OX=367110 GN=swf-1 PE=3 SV=1)
78337	e_gw1.7.708.1	ARM repeat-containing protein	2676	1.6768	Up	1.83214e-48	ENOG410XP6E(U:Intracellular trafficking, secretion, and vesicular transport)	ENOG410XP6E(vac14 homolog (S. cerevisiae))	PF11916.8(Vac14_Fig4_bd:Vacuolar protein 14 C-terminal Fig4p binding); PF12755.7(Vac14_Fab1_bd:Vacuolar 14 Fab1-binding region); PF13513.6(HEAT_EZ:HEAT-like repeat); PF02985.22(HEAT:HEAT repeat)	sp|P87145|VAC14_SCHPO(Protein VAC14 homolog OS=Schizosaccharomyces pombe (strain 972 / ATCC 24843) OX=284812 GN=SPBC25H2.03 PE=3 SV=1)
121271	fgenesh2_kg.43_#_3_#_gi|38135987|gb|CF881305.1|CF881305	expressed protein	391	1.67584	Up	1.7384e-07
133052	fgenesh1_pm.21_#_128	hypothetical protein	1437	1.6754	Up	4.34912e-11	ENOG410YBH9(S:Function unknown)	ENOG410YBH9(-)
124982	estExt_fgenesh2_kg.C_270045	mitochondrial inner membrane translocase subunit	499	1.67529	Up	1.67894e-23	COG5596(S:Function unknown)	COG5596(-)	PF02466.19(Tim17:Tim17/Tim22/Tim23/Pmp24 family)	sp|P59670|TIM17_NEUCR(Mitochondrial import inner membrane translocase subunit tim17 OS=Neurospora crassa (strain ATCC 24698 / 74-OR23-1A / CBS 708.71 / DSM 1257 / FGSC 987) OX=367110 GN=tim17 PE=2 SV=1)
96150	estExt_Genewise1Plus.C_3_t10177	hypothetical protein	3070	1.67503	Up	8.43232e-57	ENOG410XRJ9(S:Function unknown)	ENOG410XRJ9(GTPase activator activity)	PF00172.18(Zn_clus:Fungal Zn(2)-Cys(6) binuclear cluster domain)	sp|A0A2Z5U1Z1|HIMD_ASPJA(Transcription factor himD OS=Aspergillus japonicus OX=34381 GN=himD PE=3 SV=1)
44730	gw1.43.17.1	expressed protein	1275	1.67503	Up	3.33656e-17	COG0666(S:Function unknown); ENOG410YH9Y(S:Function unknown); ENOG410YIBV(S:Function unknown)	COG0666(Ankyrin Repeat); ENOG410YH9Y(-); ENOG410YIBV(Heterokaryon incompatibility protein (HET))	PF05729.12(NACHT:NACHT domain); PF13191.6(AAA_16:AAA ATPase domain); PF13401.6(AAA_22:AAA domain); PF01637.18(ATPase_2:ATPase domain predominantly from Archaea)
69331	e_gw1.1.2213.1	TPA_inf: chitinase 18-4	1182	1.6749	Up	2.90206e-07	COG3325(I:Lipid transport and metabolism)	COG3325(glycerophosphoryl diester phosphodiesterase)	PF00704.28(Glyco_hydro_18:Glycosyl hydrolases family 18)	sp|P32470|CHI1_APHAL(Chitinase 1 OS=Aphanocladium album OX=12942 GN=CHI1 PE=1 SV=2)
78490	e_gw1.7.341.1	L domain-like protein	3354	1.6736	Up	2.58028e-59	COG4886(S:Function unknown)	COG4886(leucine Rich Repeat)	PF13855.6(LRR_8:Leucine rich repeat); PF12799.7(LRR_4:Leucine Rich repeats (2 copies))
110167	estExt_Genewise1.C_7_t20472	succinyl-CoA:3-ketoacid-coenzyme A transferase subunit A	1776	1.67347	Up	3.32382e-72	COG1788(I:Lipid transport and metabolism)	COG1788(Key enzyme for ketone body catabolism. Transfers the CoA moiety from succinate to acetoacetate. Formation of the enzyme-CoA intermediate proceeds via an unstable anhydride species formed between the carboxylate groups of the enzyme and substrate (By similarity))	PF01144.23(CoA_trans:Coenzyme A transferase)	sp|P55809|SCOT1_HUMAN(Succinyl-CoA:3-ketoacid coenzyme A transferase 1, mitochondrial OS=Homo sapiens OX=9606 GN=OXCT1 PE=1 SV=1)
101073	estExt_Genewise1Plus.C_14_t10242	hypothetical protein	3704	1.67326	Up	9.5679e-30	ENOG410Y7XE(S:Function unknown)	ENOG410Y7XE(Conserved hypothetical, protein)
23313	estExt_Genemark1.C_1_t20001	A1pp-domain containing protein	1144	1.6719	Up	2.10786e-09	COG2110(S:Function unknown)	COG2110(-)	PF01661.21(Macro:Macro domain)	sp|Q9BQ69|MACD1_HUMAN(ADP-ribose glycohydrolase MACROD1 OS=Homo sapiens OX=9606 GN=MACROD1 PE=1 SV=2)
97008	estExt_Genewise1Plus.C_4_t20306	Extradiol aromatic ring-opening dioxygenase	888	1.67147	Up	1.58273e-11	COG3384(S:Function unknown)	COG3384(extradiol ring-cleavage dioxygenase class IIi protein subunit b)	PF02900.18(LigB:Catalytic LigB subunit of aromatic ring-opening dioxygenase)	sp|Q70FG7|DODA_BETVU(4,5-DOPA dioxygenase extradiol OS=Beta vulgaris OX=161934 GN=DODA PE=1 SV=1)
127278	fgenesh1_pm.2_#_603	cystathionine beta-lyase	2055	1.66935	Up	1.17552e-31	COG0626(S:Function unknown)	COG0626(-)	PF01053.20(Cys_Met_Meta_PP:Cys/Met metabolism PLP-dependent enzyme); PF01522.21(Polysacc_deac_1:Polysaccharide deacetylase)	sp|P38716|YHR2_YEAST(Uncharacterized trans-sulfuration enzyme YHR112C OS=Saccharomyces cerevisiae (strain ATCC 204508 / S288c) OX=559292 GN=YHR112C PE=1 SV=1)
74453	e_gw1.4.300.1	putative monooxygenase	1386	1.66838	Up	1.49894e-05	COG0654(K:Transcription)	COG0654(homeobox transcription factor)	PF01494.19(FAD_binding_3:FAD binding domain); PF05834.12(Lycopene_cycl:Lycopene cyclase protein); PF07992.14(Pyr_redox_2:Pyridine nucleotide-disulphide oxidoreductase); PF01266.24(DAO:FAD dependent oxidoreductase); PF13450.6(NAD_binding_8:NAD(P)-binding Rossmann-like domain); PF00070.27(Pyr_redox:Pyridine nucleotide-disulphide oxidoreductase); PF00890.24(FAD_binding_2:FAD binding domain); PF03486…	sp|J4VWM7|OPS4_BEAB2(FAD-dependent monooxygenase OpS4 OS=Beauveria bassiana (strain ARSEF 2860) OX=655819 GN=OpS4 PE=1 SV=1)
23236	estExt_Genemark1.C_1_t10346	hypothetical protein	3506	1.66822	Up	3.91474e-33	ENOG410YY2R(S:Function unknown)	ENOG410YY2R(missing oocyte, meiosis regulator, homolog (Drosophila))	PF17034.5(zinc_ribbon_16:Zinc-ribbon like family); PF17120.5(Zn_ribbon_17:Zinc-ribbon, C4HC2 type)	sp|P38164|SEA4_YEAST(SEH-associated protein 4 OS=Saccharomyces cerevisiae (strain ATCC 204508 / S288c) OX=559292 GN=SEA4 PE=1 SV=2)
94343	estExt_Genewise1Plus.C_1_t30290	Glutamine-dependent NAD(+) synthetase with GAT domain-containing protein	2103	1.66821	Up	2.5877e-42	COG0171(H:Coenzyme transport and metabolism)	COG0171(nh(3)-dependent nad( ) synthetase)	PF00795.22(CN_hydrolase:Carbon-nitrogen hydrolase); PF02540.17(NAD_synthase:NAD synthase)	sp|P38795|NADE_YEAST(Glutamine-dependent NAD(+) synthetase OS=Saccharomyces cerevisiae (strain ATCC 204508 / S288c) OX=559292 GN=QNS1 PE=1 SV=1)
12339	gm1.7895_g	hypothetical protein	1986	1.66808	Up	1.47748e-08	COG5024(S:Function unknown)	COG5024(solute carrier family 25 (aspartate glutamate carrier), member)	PF00134.23(Cyclin_N:Cyclin, N-terminal domain); PF02984.19(Cyclin_C:Cyclin, C-terminal domain)	sp|Q5A0A9|CG24_CANAL(G2/mitotic-specific cyclin-4 OS=Candida albicans (strain SC5314 / ATCC MYA-2876) OX=237561 GN=CLB4 PE=1 SV=1)
71565	e_gw1.2.1256.1	DRMBL-domain containing protein	2457	1.66792	Up	2.90206e-07	COG1236(S:Function unknown)	COG1236(-)	PF07522.14(DRMBL:DNA repair metallo-beta-lactamase); PF12706.7(Lactamase_B_2:Beta-lactamase superfamily domain)	sp|Q10264|PSO2_SCHPO(DNA cross-link repair protein pso2/snm1 OS=Schizosaccharomyces pombe (strain 972 / ATCC 24843) OX=284812 GN=pso2 PE=3 SV=3)
8232	gm1.3788_g	DNA mismatch repair protein MSH2	2850	1.66773	Up	1.38293e-12	COG0249(S:Function unknown)	COG0249(PQ loop repeat)	PF00488.21(MutS_V:MutS domain V); PF05192.18(MutS_III:MutS domain III); PF05188.17(MutS_II:MutS domain II); PF01624.20(MutS_I:MutS domain I); PF05190.18(MutS_IV:MutS family domain IV)	sp|O13396|MSH2_NEUCR(DNA mismatch repair protein msh-2 OS=Neurospora crassa (strain ATCC 24698 / 74-OR23-1A / CBS 708.71 / DSM 1257 / FGSC 987) OX=367110 GN=msh-2 PE=3 SV=1)
106201	estExt_Genewise1.C_1_t40460	DnaJ-domain containing protein	1152	1.66742	Up	1.0418e-07	ENOG410XNV5(O:Posttranslational modification, protein turnover, chaperones)	ENOG410XNV5(DnaJ (Hsp40) homolog, subfamily C, member 21)	PF00226.31(DnaJ:DnaJ domain); PF12171.8(zf-C2H2_jaz:Zinc-finger double-stranded RNA-binding); PF12874.7(zf-met:Zinc-finger of C2H2 type); PF12756.7(zf-C2H2_2:C2H2 type zinc-finger (2 copies))	sp|Q5F1R6|DJC21_HUMAN(DnaJ homolog subfamily C member 21 OS=Homo sapiens OX=9606 GN=DNAJC21 PE=1 SV=2)
74637	e_gw1.4.233.1	hypothetical protein	633	1.6671	Up	8.87608e-09	ENOG4110XR4(S:Function unknown); ENOG41123HK(S:Function unknown)	ENOG4110XR4(Protein of unknown function (DUF498/DUF598)); ENOG41123HK(Conserved hypothetical, protein)	PF04430.14(DUF498:Protein of unknown function (DUF498/DUF598))	sp|Q9JKL4|NDUF3_MOUSE(NADH dehydrogenase [ubiquinone] 1 alpha subcomplex assembly factor 3 OS=Mus musculus OX=10090 GN=Ndufaf3 PE=1 SV=1)
88324	e_gw1.23.298.1	radical SAM superfamily protein	1080	1.66558	Up	8.87608e-09	COG1313(S:Function unknown)	COG1313(radical SAM domain protein)	PF04055.21(Radical_SAM:Radical SAM superfamily); PF13353.6(Fer4_12:4Fe-4S single cluster domain)	sp|Q58087|Y674_METJA(Uncharacterized protein MJ0674 OS=Methanocaldococcus jannaschii (strain ATCC 43067 / DSM 2661 / JAL-1 / JCM 10045 / NBRC 100440) OX=243232 GN=MJ0674 PE=4 SV=1)
81180	e_gw1.10.517.1	hypothetical protein	831	1.66548	Up	1.2384e-06	ENOG4110WK0(S:Function unknown)	ENOG4110WK0(NUDIX domain)	PF00293.28(NUDIX:NUDIX domain)
70417	e_gw1.2.1320.1	putative alpha/beta hydrolase	1416	1.66496	Up	6.1988e-108	COG0596(J:Translation, ribosomal structure and biogenesis)	COG0596(Component of the eukaryotic translation initiation factor 3 (eIF-3) complex)	PF00561.20(Abhydrolase_1:alpha/beta hydrolase fold); PF12146.8(Hydrolase_4:Serine aminopeptidase, S33); PF12697.7(Abhydrolase_6:Alpha/beta hydrolase family); PF06028.11(DUF915:Alpha/beta hydrolase of unknown function (DUF915)); PF00756.20(Esterase:Putative esterase)	sp|O14249|CLD1_SCHPO(probable cardiolipin-specific deacylase, mitochondrial OS=Schizosaccharomyces pombe (strain 972 / ATCC 24843) OX=284812 GN=SPAC6G10.03c PE=3 SV=1)
68511	e_gw1.1.1320.1	APSES-domain containing protein	2397	1.66258	Up	5.76256e-12	COG0666(S:Function unknown)	COG0666(Zinc finger, FYVE domain containing 20)	PF13637.6(Ank_4:Ankyrin repeats (many copies)); PF13606.6(Ank_3:Ankyrin repeat); PF12796.7(Ank_2:Ankyrin repeats (3 copies)); PF00023.30(Ank:Ankyrin repeat); PF13857.6(Ank_5:Ankyrin repeats (many copies)); PF04383.13(KilA-N:KilA-N domain)	sp|P01129|CDC10_SCHPO(Start control protein cdc10 OS=Schizosaccharomyces pombe (strain 972 / ATCC 24843) OX=284812 GN=cdc10 PE=1 SV=1)
98605	estExt_Genewise1Plus.C_7_t30049	augmenter of liver regeneration	958	1.66131	Up	4.57174e-222	COG5054(O:Posttranslational modification, protein turnover, chaperones)	COG5054(thiol oxidase activity)	PF04777.13(Evr1_Alr:Erv1 / Alr family)	sp|P56213|ALR_MOUSE(FAD-linked sulfhydryl oxidase ALR OS=Mus musculus OX=10090 GN=Gfer PE=1 SV=2)
5702	gm1.1258_g	ATP-dependent protease La	3336	1.66106	Up	0	COG0466(O:Posttranslational modification, protein turnover, chaperones)	COG0466(ATP-dependent serine protease that mediates the selective degradation of mutant and abnormal proteins as well as certain short-lived regulatory proteins. Required for cellular homeostasis and for survival from DNA damage and developmental changes induced by stress. Degrades polypeptides processively to yield small peptide fragments that are 5 to 10 amino acids long. Binds to DNA in a doub…	PF05362.13(Lon_C:Lon protease (S16) C-terminal proteolytic domain); PF02190.16(LON_substr_bdg:ATP-dependent protease La (LON) substrate-binding domain); PF00004.29(AAA:ATPase family associated with various cellular activities (AAA)); PF07728.14(AAA_5:AAA domain (dynein-related subfamily)); PF07724.14(AAA_2:AAA domain (Cdc48 subfamily)); PF13541.6(ChlI:Subunit ChlI of Mg-chelatase); PF13401.6(AAA_…	sp|Q7S8C4|LONM_NEUCR(Lon protease homolog, mitochondrial OS=Neurospora crassa (strain ATCC 24698 / 74-OR23-1A / CBS 708.71 / DSM 1257 / FGSC 987) OX=367110 GN=pim1 PE=3 SV=1)
83507	e_gw1.14.105.1	Carbon-nitrogen hydrolase	948	1.66003	Up	9.18636e-28	COG0388(S:Function unknown)	COG0388(Nuclear membrane fusion protein Kar5)	PF00795.22(CN_hydrolase:Carbon-nitrogen hydrolase)	sp|P55176|YPQQ_PSEPH(Hydrolase in pqqF 5'region OS=Pseudomonas protegens (strain DSM 19095 / LMG 27888 / CHA0) OX=1124983 PE=3 SV=1)
39568	fgenesh1_pg.37_#_14	Adenine nucleotide alpha hydrolases-like protein	1185	1.65946	Up	2.09906e-12	COG0037(D:Cell cycle control, cell division, chromosome partitioning)	COG0037(Ligates lysine onto the cytidine present at position 34 of the AUA codon-specific tRNA(Ile) that contains the anticodon CAU, in an ATP-dependent manner. Cytidine is converted to lysidine, thus changing the amino acid specificity of the tRNA from methionine to isoleucine (By similarity))	PF01171.20(ATP_bind_3:PP-loop family); PF16503.5(zn-ribbon_14:Zinc-ribbon)	sp|A2Q879|CTU1_ASPNC(Cytoplasmic tRNA 2-thiolation protein 1 OS=Aspergillus niger (strain CBS 513.88 / FGSC A1513) OX=425011 GN=ncs6 PE=3 SV=1)
80532	e_gw1.10.307.1	Concanavalin A-like lectin/glucanase	1248	1.65918	Up	2.60856e-22	ENOG4111S1B(S:Function unknown)	ENOG4111S1B(glycoside hydrolase family 16 protein)	PF00722.21(Glyco_hydro_16:Glycosyl hydrolases family 16)
73396	e_gw1.3.547.1	putative aminotransferase	1338	1.65845	Up	3.74626e-08	COG0436(J:Translation, ribosomal structure and biogenesis)	COG0436(lysyl-trna synthetase)	PF00155.21(Aminotran_1_2:Aminotransferase class I and II)	sp|A2AIG8|1A1L1_MOUSE(1-aminocyclopropane-1-carboxylate synthase-like protein 1 OS=Mus musculus OX=10090 GN=Accs PE=2 SV=1)
81055	e_gw1.10.326.1	hypothetical protein	609	1.658	Up	0.000110152	ENOG411211V(S:Function unknown)	ENOG411211V(-)
113588	estExt_Genewise1.C_17_t10345	Cytochrome c and c1 haem-lyase	1104	1.65763	Up	1.98145e-20	ENOG410YAUW(S:Function unknown)	ENOG410YAUW(Chromosome 16 open reading frame 58)	PF01265.17(Cyto_heme_lyase:Cytochrome c/c1 heme lyase)	sp|O13962|YE42_SCHPO(Putative cytochrome c1 heme lyase OS=Schizosaccharomyces pombe (strain 972 / ATCC 24843) OX=284812 GN=SPAC24C9.02c PE=3 SV=1)
140102	estExt_fgenesh1_pg.C_2_t10150	GPI-anchor transamidase precursor	1664	1.65727	Up	5.26022e-90	COG5206(O:Posttranslational modification, protein turnover, chaperones)	COG5206(phosphatidylinositol glycan anchor biosynthesis, class K)	PF01650.18(Peptidase_C13:Peptidase C13 family)	sp|P49018|GPI8_YEAST(GPI-anchor transamidase OS=Saccharomyces cerevisiae (strain ATCC 204508 / S288c) OX=559292 GN=GPI8 PE=1 SV=1)
77355	e_gw1.6.912.1	hypothetical protein	1344	1.65715	Up	6.90992e-26	COG0697(E:Amino acid transport and metabolism); COG0697(G:Carbohydrate transport and metabolism)	COG0697(membrane); COG0697(membrane)	PF00892.20(EamA:EamA-like transporter family); PF13127.6(DUF3955:Protein of unknown function (DUF3955)); PF16913.5(PUNUT:Purine nucleobase transmembrane transport); PF06027.12(SLC35F:Solute carrier family 35); PF08449.11(UAA:UAA transporter family)	sp|Q03730|YMB8_YEAST(Uncharacterized vacuolar membrane protein YML018C OS=Saccharomyces cerevisiae (strain ATCC 204508 / S288c) OX=559292 GN=YML018C PE=1 SV=1)
13209	gm1.8765_g	hypothetical protein	234	1.65371	Up	3.85958e-05	ENOG411259R(U:Intracellular trafficking, secretion, and vesicular transport)	ENOG411259R(subunit e)	PF05493.13(ATP_synt_H:ATP synthase subunit H)	sp|Q5K8S8|VA0E_CRYNJ(V-type proton ATPase subunit e OS=Cryptococcus neoformans var. neoformans serotype D (strain JEC21 / ATCC MYA-565) OX=214684 GN=VMA9 PE=3 SV=2)
87971	e_gw1.22.302.1	DNA glycosylase	1062	1.65239	Up	5.30946e-06	COG0122(S:Function unknown)	COG0122(mannan polymerase II complex ANP1 subunit)	PF00730.25(HhH-GPD:HhH-GPD superfamily base excision DNA repair protein)	sp|P22134|MAG_YEAST(DNA-3-methyladenine glycosylase OS=Saccharomyces cerevisiae (strain ATCC 204508 / S288c) OX=559292 GN=MAG1 PE=1 SV=1)
104093	estExt_Genewise1Plus.C_290067	Spc98 family protein	3188	1.65045	Up	3.083e-32	ENOG410XNRE(S:Function unknown)	ENOG410XNRE(Tubulin, gamma complex associated protein 2)	PF17681.1(GCP_N_terminal:Gamma tubulin complex component N-terminal); PF04130.13(GCP_C_terminal:Gamma tubulin complex component C-terminal)	sp|Q9Y705|ALP4_SCHPO(Spindle pole body component alp4 OS=Schizosaccharomyces pombe (strain 972 / ATCC 24843) OX=284812 GN=alp4 PE=1 SV=1)
52587	gw1.17.265.1	expressed protein	960	1.6499	Up	6.51534e-05	ENOG4110WAE(S:Function unknown)	ENOG4110WAE(-)	PF00646.33(F-box:F-box domain)
81622	e_gw1.11.371.1	hypothetical protein	4017	1.64919	Up	2.03506e-19	ENOG410ZDN8(B:Chromatin structure and dynamics)	ENOG410ZDN8(SNF2 family N-terminal domain)	PF15446.6(zf-PHD-like:PHD/FYVE-zinc-finger like domain); PF00176.23(SNF2_N:SNF2 family N-terminal domain); PF00271.31(Helicase_C:Helicase conserved C-terminal domain); PF11496.8(HDA2-3:Class II histone deacetylase complex subunits 2 and 3); PF04851.15(ResIII:Type III restriction enzyme, res subunit); PF00385.24(Chromo:Chromo (CHRromatin Organisation MOdifier) domain); PF00628.29(PHD:PHD-finger)	sp|Q9P793|MIT1_SCHPO(Chromatin remodeling factor mit1 OS=Schizosaccharomyces pombe (strain 972 / ATCC 24843) OX=284812 GN=mit1 PE=1 SV=1)
34802	fgenesh1_pg.6_#_377	hypothetical protein	1812	1.64899	Up	4.24852e-17	ENOG4111MVS(S:Function unknown)	ENOG4111MVS(Chromatin assembly factor 1 subunit A)	PF12253.8(CAF1A:Chromatin assembly factor 1 subunit A)
111405	estExt_Genewise1.C_10_t20057	hypothetical protein	1620	1.64806	Up	2.78874e-13	COG2059(P:Inorganic ion transport and metabolism)	COG2059(Chromate)	PF02417.15(Chromate_transp:Chromate transporter)	sp|P14285|CHRA_PSEAI(Chromate transport protein OS=Pseudomonas aeruginosa OX=287 GN=chrA PE=2 SV=1)
6129	gm1.1685_g	hypothetical protein	924	1.64766	Up	5.41836e-15	ENOG410XQBV(S:Function unknown)	ENOG410XQBV(Nucleolar complex associated 4 homolog (S. cerevisiae))	PF14327.6(CSTF2_hinge:Hinge domain of cleavage stimulation factor subunit 2); PF00076.22(RRM_1:RNA recognition motif. (a.k.a. RRM, RBD, or RNP domain)); PF14304.6(CSTF_C:Transcription termination and cleavage factor C-terminal)	sp|Q8BIQ5|CSTF2_MOUSE(Cleavage stimulation factor subunit 2 OS=Mus musculus OX=10090 GN=Cstf2 PE=1 SV=2)
118390	fgenesh2_kg.5_#_137_#_gi|30123133|gb|CB908475.1|CB908475	hypothetical protein	563	1.64522	Up	7.65842e-124	ENOG41126E7(S:Function unknown); ENOG41123KN(S:Function unknown)	ENOG41126E7(coiled-coil-helix-coiled-coil-helix domain containing); ENOG41123KN(-)	PF09849.9(DUF2076:Uncharacterized protein conserved in bacteria (DUF2076)); PF06747.13(CHCH:CHCH domain)	sp|Q03667|MIX17_YEAST(Mitochondrial intermembrane space cysteine motif-containing protein MIX17 OS=Saccharomyces cerevisiae (strain ATCC 204508 / S288c) OX=559292 GN=MIX17 PE=1 SV=1)
7448	gm1.3004_g	hypothetical protein	336	1.6449	Up	1.12659e-06			PF15511.6(CENP-T_C:Centromere kinetochore component CENP-T histone fold); PF11705.8(RNA_pol_3_Rpc31:DNA-directed RNA polymerase III subunit Rpc31)
122916	estExt_fgenesh2_kg.C_60126	alkaline phosphatase	1135	1.64457	Up	4.8659e-09	ENOG410ZKYT(S:Function unknown)	ENOG410ZKYT(Class III chitinase)	PF00704.28(Glyco_hydro_18:Glycosyl hydrolases family 18)	sp|P29025|CHI1_RHINI(Chitinase 1 OS=Rhizopus niveus OX=4844 GN=CHI1 PE=3 SV=1)
24495	estExt_Genemark1.C_60146	SEP-domain containing protein	1479	1.64333	Up	2.58508e-126	ENOG410YGXU(O:Posttranslational modification, protein turnover, chaperones)	ENOG410YGXU(UBX domain protein)	PF08059.13(SEP:SEP domain); PF14555.6(UBA_4:UBA-like domain); PF00789.20(UBX:UBX domain); PF03943.13(TAP_C:TAP C-terminal domain)	sp|P0C8Q0|UBX1_EMENI(UBX domain-containing protein 1 OS=Emericella nidulans (strain FGSC A4 / ATCC 38163 / CBS 112.46 / NRRL 194 / M139) OX=227321 GN=ubx1 PE=3 SV=1)
100044	estExt_Genewise1Plus.C_11_t10268	hypothetical protein	1796	1.64307	Up	9.43066e-38	ENOG410XRKY(O:Posttranslational modification, protein turnover, chaperones)	ENOG410XRKY(COP9 (constitutive photomorphogenic) homolog, subunit 3 (Arabidopsis)		sp|Q7S7G7|CSN3_NEUCR(COP9 signalosome complex subunit 3 OS=Neurospora crassa (strain ATCC 24698 / 74-OR23-1A / CBS 708.71 / DSM 1257 / FGSC 987) OX=367110 GN=csn-3 PE=1 SV=2)
31885	fgenesh1_pg.1_#_374	putative NADPH-dependent alpha-keto amide reductase	882	1.64288	Up	3.71112e-14	COG0656(S:Function unknown)	COG0656(UPF0061 protein)	PF00248.21(Aldo_ket_red:Aldo/keto reductase family)	sp|O13848|I3ACR_SCHPO(NAD/NADP-dependent indole-3-acetaldehyde reductase OS=Schizosaccharomyces pombe (strain 972 / ATCC 24843) OX=284812 GN=SPAC19G12.09 PE=1 SV=1)
99307	estExt_Genewise1Plus.C_9_t10340	expressed protein	801	1.64221	Up	1.57915e-28	ENOG41126J1(S:Function unknown)	ENOG41126J1(Optic atrophy 3 protein (OPA3))	PF07047.12(OPA3:Optic atrophy 3 protein (OPA3))
109932	estExt_Genewise1.C_7_t10411	Cytochrome oxidase biogenesis protein%2C Cox20 subunit	606	1.6422	Up	2.86294e-35	ENOG4112BPB(S:Function unknown)	ENOG4112BPB(Protein of unknown function (DUF3767))	PF12597.8(DUF3767:Protein of unknown function (DUF3767))
87303	e_gw1.20.235.1	4-aminobutyrate aminotransferase	1410	1.64159	Up	3.4083e-113	COG0160(S:Function unknown)	COG0160(-)	PF00202.21(Aminotran_3:Aminotransferase class-III)	sp|P14010|GABAT_EMENI(4-aminobutyrate aminotransferase OS=Emericella nidulans (strain FGSC A4 / ATCC 38163 / CBS 112.46 / NRRL 194 / M139) OX=227321 GN=gatA PE=3 SV=1)
52603	gw1.23.70.1	hypothetical protein	522	1.64129	Up	3.59326e-62	ENOG410Y9A2(S:Function unknown)	ENOG410Y9A2(Protein of unknown function (DUF3237))	PF11578.8(DUF3237:Protein of unknown function (DUF3237))
101095	estExt_Genewise1Plus.C_14_t10276	ATPase synthesis protein 25%2C mitochondrial	2076	1.64118	Up	3.12506e-105	ENOG4111N7B(A:RNA processing and modification)	ENOG4111N7B(ATPase synthesis protein 25, mitochondrial)	PF02410.15(RsfS:Ribosomal silencing factor during starvation)	sp|C7YY76|ATP25_NECH7(ATPase synthesis protein 25, mitochondrial OS=Nectria haematococca (strain 77-13-4 / ATCC MYA-4622 / FGSC 9596 / MPVI) OX=660122 GN=ATP25 PE=3 SV=1)
127845	fgenesh1_pm.3_#_434	putative pyridine nucleotide-disulfide oxidoreductase	2247	1.64075	Up	2.52584e-10	COG2072(S:Function unknown)	COG2072(Slime mold cyclic AMP receptor)	PF00743.19(FMO-like:Flavin-binding monooxygenase-like); PF13454.6(NAD_binding_9:FAD-NAD(P)-binding); PF07992.14(Pyr_redox_2:Pyridine nucleotide-disulphide oxidoreductase); PF13434.6(K_oxygenase:L-lysine 6-monooxygenase (NADPH-requiring)); PF13450.6(NAD_binding_8:NAD(P)-binding Rossmann-like domain); PF13738.6(Pyr_redox_3:Pyridine nucleotide-disulphide oxidoreductase); PF01946.17(Thi4:Thi4 family)	sp|Q9LMA1|FMO1_ARATH(Probable flavin-containing monooxygenase 1 OS=Arabidopsis thaliana OX=3702 GN=FMO1 PE=2 SV=1)
82432	e_gw1.12.152.1	putative threonine--tRNA ligase	1494	1.63993	Up	8.71482e-42	COG0441(D:Cell cycle control, cell division, chromosome partitioning)	COG0441(Maf-like protein)	PF00587.25(tRNA-synt_2b:tRNA synthetase class II core domain (G, H, P, S and T)); PF03129.20(HGTP_anticodon:Anticodon binding domain)	sp|O13969|SYTM_SCHPO(Probable threonine--tRNA ligase, mitochondrial OS=Schizosaccharomyces pombe (strain 972 / ATCC 24843) OX=284812 GN=SPAC24C9.09 PE=3 SV=2)
129481	fgenesh1_pm.7_#_154	transcriptional regulator	1167	1.63835	Up	2.28948e-05	ENOG41128P0(K:Transcription)	ENOG41128P0(Transcriptional regulator)
11526	gm1.7082_g	Cell division control 14%2C SIN component	843	1.63818	Up	9.1554e-11	ENOG41111PH(S:Function unknown)	ENOG41111PH(cell division control protein 14)	PF08045.11(CDC14:Cell division control protein 14, SIN component)	sp|P36589|CDC14_SCHPO(Cell division control protein 14 OS=Schizosaccharomyces pombe (strain 972 / ATCC 24843) OX=284812 GN=cdc14 PE=1 SV=1)
123040	estExt_fgenesh2_kg.C_70070	ATP synthase protein 9 precursor	719	1.63739	Up	0	COG0636(C:Energy production and conversion); ENOG41123ET(F:Nucleotide transport and metabolism)	COG0636(F(1)F(0) ATP synthase produces ATP from ADP in the presence of a proton or sodium gradient. F-type ATPases consist of two structural domains, F(1) containing the extramembraneous catalytic core and F(0) containing the membrane proton channel, linked together by a central stalk and a peripheral stalk. During catalysis, ATP synthesis in the catalytic domain of F(1) is coupled via a rotary m…	PF00137.21(ATP-synt_C:ATP synthase subunit C)	sp|P00842|ATP9_NEUCR(ATP synthase subunit 9, mitochondrial OS=Neurospora crassa (strain ATCC 24698 / 74-OR23-1A / CBS 708.71 / DSM 1257 / FGSC 987) OX=367110 GN=oli PE=1 SV=1)
89481	e_gw1.26.235.1	putative methionyl aminopeptidase	1323	1.63702	Up	2.00274e-106	COG0024(O:Posttranslational modification, protein turnover, chaperones)	COG0024(AhpC TSA antioxidant enzyme domain containing 1)	PF00557.24(Peptidase_M24:Metallopeptidase family M24)	sp|C7YS77|MAP21_NECH7(Methionine aminopeptidase 2-1 OS=Nectria haematococca (strain 77-13-4 / ATCC MYA-4622 / FGSC 9596 / MPVI) OX=660122 GN=NECHADRAFT_61369 PE=3 SV=1)
101907	estExt_Genewise1Plus.C_17_t10102	iron/manganese superoxide dismutase domain-containing protein	911	1.63655	Up	8.1009e-123	COG0605(S:Function unknown)	COG0605(Conserved hypothetical, protein)	PF02777.18(Sod_Fe_C:Iron/manganese superoxide dismutases, C-terminal domain); PF00081.22(Sod_Fe_N:Iron/manganese superoxide dismutases, alpha-hairpin domain)	sp|P07895|SODM_RAT(Superoxide dismutase [Mn], mitochondrial OS=Rattus norvegicus OX=10116 GN=Sod2 PE=1 SV=2)
97256	estExt_Genewise1Plus.C_5_t10012	hypothetical protein	1841	1.6364	Up	7.65522e-19	ENOG410YDTX(S:Function unknown); COG1472(S:Function unknown); ENOG410Y6SU(K:Transcription)	ENOG410YDTX(Fungal Zn(2)-Cys(6) binuclear cluster domain); COG1472(Fungal Zn(2)-Cys(6) binuclear cluster domain); ENOG410Y6SU(Fungal Zn(2)-Cys(6) binuclear cluster domain)	PF00172.18(Zn_clus:Fungal Zn(2)-Cys(6) binuclear cluster domain)
72569	e_gw1.3.408.1	MFS general substrate transporter	1761	1.63537	Up	0.000486434	COG0477(S:Function unknown)	COG0477(-)	PF07690.16(MFS_1:Major Facilitator Superfamily)	sp|O94343|YHMA_SCHPO(Uncharacterized MFS-type transporter C1271.10c OS=Schizosaccharomyces pombe (strain 972 / ATCC 24843) OX=284812 GN=SPBC1271.10c PE=1 SV=1)
9797	gm1.5353_g	lysyl-tRNA synthetase	1860	1.63416	Up	8.92094e-104	COG1190(L:Replication, recombination and repair)	COG1190(purine NTP-dependent helicase activity)	PF00152.20(tRNA-synt_2:tRNA synthetases class II (D, K and N)); PF01336.25(tRNA_anti-codon:OB-fold nucleic acid binding domain); PF01409.20(tRNA-synt_2d:tRNA synthetases class II core domain (F))	sp|O74858|SYKM_SCHPO(Lysine--tRNA ligase, mitochondrial OS=Schizosaccharomyces pombe (strain 972 / ATCC 24843) OX=284812 GN=msk1 PE=3 SV=1)
6176	gm1.1732_g	Mannosyltransferase	1311	1.63258	Up	2.28948e-05	COG5542(S:Function unknown)	COG5542(Phosphatidylinositol glycan anchor biosynthesis class V)	PF04188.13(Mannosyl_trans2:Mannosyltransferase (PIG-V))	sp|Q4I0K3|GPI18_GIBZE(GPI mannosyltransferase 2 OS=Gibberella zeae (strain PH-1 / ATCC MYA-4620 / FGSC 9075 / NRRL 31084) OX=229533 GN=GPI18 PE=3 SV=1)
11612	gm1.7168_g	Protein kinase-like protein	2181	1.63159	Up	5.6042e-14	ENOG410XNQP(T:Signal transduction mechanisms)	ENOG410XNQP(NIMA-related kinase)	PF00069.25(Pkinase:Protein kinase domain); PF07714.17(Pkinase_Tyr:Protein tyrosine kinase); PF14531.6(Kinase-like:Kinase-like)	sp|P48479|NIM1_NEUCR(G2-specific protein kinase nim-1 OS=Neurospora crassa (strain ATCC 24698 / 74-OR23-1A / CBS 708.71 / DSM 1257 / FGSC 987) OX=367110 GN=nim-1 PE=2 SV=2)
98741	estExt_Genewise1Plus.C_8_t10084	hypothetical protein	1250	1.63154	Up	3.37046e-21	ENOG410YRVC(S:Function unknown)	ENOG410YRVC(GPNloop GTPase 2)	PF03029.17(ATP_bind_1:Conserved hypothetical ATP binding protein)	sp|Q08726|GPN2_YEAST(GPN-loop GTPase 2 OS=Saccharomyces cerevisiae (strain ATCC 204508 / S288c) OX=559292 GN=GPN2 PE=1 SV=1)
82006	e_gw1.12.570.1	glutamate carboxypeptidase 2	2388	1.63109	Up	0	COG2234(S:Function unknown)	COG2234(-)	PF04253.15(TFR_dimer:Transferrin receptor-like dimerisation domain); PF04389.17(Peptidase_M28:Peptidase family M28); PF02225.22(PA:PA domain)	sp|D4B1R0|GCP1_ARTBC(Probable glutamate carboxypeptidase ARB_02390 OS=Arthroderma benhamiae (strain ATCC MYA-4681 / CBS 112371) OX=663331 GN=ARB_02390 PE=1 SV=1)
125468	estExt_fgenesh2_kg.C_430005	expressed protein	671	1.62914	Up	8.085e-06	ENOG410ZHKY(S:Function unknown)	ENOG410ZHKY(-)
79548	e_gw1.9.459.1	hypothetical protein	324	1.62781	Up	0.000168451	ENOG410XX48(U:Intracellular trafficking, secretion, and vesicular transport)	ENOG410XX48(Required for the assembly of the V0 complex of the vacuolar ATPase (V-ATPase) in the endoplasmic reticulum (By similarity))	PF09446.10(VMA21:VMA21-like domain)	sp|A4R0J5|VMA21_MAGO7(Vacuolar ATPase assembly integral membrane protein VMA21 OS=Magnaporthe oryzae (strain 70-15 / ATCC MYA-4617 / FGSC 8958) OX=242507 GN=VMA21 PE=3 SV=1)
114281	estExt_Genewise1.C_200327	hypothetical protein	2571	1.62693	Up	4.53988e-22	ENOG410ZHQH(S:Function unknown)	ENOG410ZHQH(Conserved hypothetical, protein)	PF08700.11(Vps51:Vps51/Vps67)
137792	estExt_fgenesh1_pm.C_120210	alpha-acetolactate decarboxylase	727	1.62628	Up	1.4396e-07	COG3527(Q:Secondary metabolites biosynthesis, transport and catabolism)	COG3527(Alpha-acetolactate decarboxylase)	PF03306.13(AAL_decarboxy:Alpha-acetolactate decarboxylase)	sp|Q607C3|ALDC_METCA(Alpha-acetolactate decarboxylase OS=Methylococcus capsulatus (strain ATCC 33009 / NCIMB 11132 / Bath) OX=243233 GN=budA PE=3 SV=1)
23820	estExt_Genemark1.C_2_t20035	Protein kinase-like protein	2609	1.62544	Up	8.085e-06	ENOG410XNY0(T:Signal transduction mechanisms)	ENOG410XNY0(Mitogen-activated protein kinase)	PF00069.25(Pkinase:Protein kinase domain); PF07714.17(Pkinase_Tyr:Protein tyrosine kinase); PF14531.6(Kinase-like:Kinase-like)	sp|Q9UU87|PPK34_SCHPO(Serine/threonine-protein kinase ppk34 OS=Schizosaccharomyces pombe (strain 972 / ATCC 24843) OX=284812 GN=ppk34 PE=3 SV=2)
10456	gm1.6012_g	Proteasome-domain containing protein	612	1.62379	Up	8.11386e-105	COG0638(S:Function unknown)	COG0638(ribosomal RNA processing 9, small subunit (SSU) processome component, homolog (yeast))	PF00227.26(Proteasome:Proteasome subunit)	sp|Q9P6U7|PSB4_NEUCR(Probable proteasome subunit beta type-4 OS=Neurospora crassa (strain ATCC 24698 / 74-OR23-1A / CBS 708.71 / DSM 1257 / FGSC 987) OX=367110 GN=pcb-4 PE=3 SV=2)
103264	estExt_Genewise1Plus.C_230287	Adaptin ear-binding coat-associated protein 1 NECAP-1	959	1.6231	Up	8.61946e-08	ENOG41113PS(S:Function unknown)	ENOG41113PS(NECAP endocytosis associated)	PF07933.14(DUF1681:Protein of unknown function (DUF1681))	sp|Q9VXB0|NECAP_DROME(NECAP-like protein CG9132 OS=Drosophila melanogaster OX=7227 GN=CG9132 PE=2 SV=1)
81538	e_gw1.11.241.1	RNB-domain containing protein	2835	1.62161	Up	2.87056e-18	COG0557(S:Function unknown)	COG0557(WD-40 repeat family protein)	PF00773.19(RNB:RNB domain)	sp|P47950|CYT4_NEUCR(Mitochondrial protein cyt-4 OS=Neurospora crassa (strain ATCC 24698 / 74-OR23-1A / CBS 708.71 / DSM 1257 / FGSC 987) OX=367110 GN=cyt-4 PE=3 SV=1)
131985	fgenesh1_pm.16_#_87	hypothetical protein	1566	1.62071	Up	0.000285928	COG1835(I:Lipid transport and metabolism)	COG1835(Acyltransferase)	PF01757.22(Acyl_transf_3:Acyltransferase family)	sp|L0MXJ3|FC9_PHOAM(O-acetyltransferase PaAT-1 OS=Phomopsis amygdali OX=1214568 GN=PaAT-1 PE=1 SV=1)
123146	estExt_fgenesh2_kg.C_70181	expressed protein	576	1.61905	Up	1.70936e-06	ENOG410XNVT(K:Transcription)	ENOG410XNVT(RNA polymerase II associated protein 1)	PF08620.10(RPAP1_C:RPAP1-like, C-terminal)	sp|O43088|RBA50_SCHPO(RNA polymerase II-associated protein rba50 OS=Schizosaccharomyces pombe (strain 972 / ATCC 24843) OX=284812 GN=rba50 PE=3 SV=1)
[truncated: 1,955 more rows]

## Sheet: 48h
Differentially Expressed Genes (DEGs) between T. reesei U5 and Rut-C30 (48 h)
GeneID	Model Name	Description	Length	log2 Ratio(U5/C30) 48 h	Up-Down-Regulation(U4h4/C4h2)	P-value	FDR	cog	cog_description	pfam	swissprot
[truncated: 1,240 more rows]
