# Supplementary material for: Global Reprogramming of Gene Transcription in Trichoderma reesei by Overexpressing an Artificial Transcription Factor for Improved Cellulase Production and Identification of Ypr1 as an Associated Regulator
Source: Front Bioeng Biotechnol. 2020 Jul 3;8:649. doi: 10.3389/fbioe.2020.00649 (PMC7351519; doi:10.3389/fbioe.2020.00649)
Supplement: Supplementary file 4 [file Table_4.XLSX]

## Sheet: Sheet1
DEGs of transcription factors between T. reesei U5 and Rut-C30
Family	Model ID	Protein Id	Gene Length	log2 24 h Ratio(U5/C30)	log2 48 h Ratio(U5/C30)	P-value（24 h)	FDR(24 h)	P-value (48 h)	FDR (48 h)	Domains
PF00010	e_gw1.48.41.1	93207	1604	-0.319542	-2.27728	0.544822	0.601429	8.1065e-25	6.43375e-24	Helix-loop-helix DNA-binding domain
PF00010	estExt_fgenesh1_pg.C_1_t10396	139776	1654	-1.52938	-0.718629	4.84e-196	9.85e-195	2.75278e-59	3.98035e-58	Helix-loop-helix DNA-binding domain
PF00010	estExt_Genewise1Plus.C_13_t20069	100921	2664	-1.84546	-0.662818	0	0	1.01896e-109	2.36327e-108	Helix-loop-helix DNA-binding domain
PF00010	estExt_Genewise1Plus.C_14_t10223	101064	1505	-2.8035	-0.560606	0	0	1.02251e-62	1.53859e-61	Helix-loop-helix DNA-binding domain
PF00010	fgenesh1_pg.9_#_76	35555	1545	0.738996	-0.0498759	4.15e-15	1.45e-14	0.522832	0.61314	Helix-loop-helix DNA-binding domain
PF00010	estExt_fgenesh1_pm.C_120002	137695	2344	0.902266	0.297812	1.22e-07	2.91e-07	0.0215098	0.0414518	Helix-loop-helix DNA-binding domainMaf-like protein
PF00010	estExt_fgenesh1_pm.C_110258	137680	2420	-0.568682	0.326566	1.18e-07	2.83e-07	1.2228e-05	3.7947e-05	Helix-loop-helix DNA-binding domain
PF00010	e_gw1.1.2053.1	69708	2212	0.665882	0.625987	7.9e-06	1.68e-05	3.60016e-08	1.38874e-07	Helix-loop-helix DNA-binding domain
PF00010	gm1.5870_g	10314	1037	-0.351926	0.662226	0.000959496	0.00170303	3.342e-11	1.59253e-10	Helix-loop-helix DNA-binding domain
PF01422	estExt_Genewise1Plus.C_350140	104635	3747	0.631661	0.395949	1.3e-09	3.53e-09	6.29598e-09	2.57345e-08	NF-X1 type zinc fingerR3H domain
PF02002	e_gw1.18.526.1	85947	1433	1.28231	0.00805415	1.95e-11	5.76e-11	0.96819	0.98134	TFIIE alpha subunit
PF02257	fgenesh1_pg.28_#_56	38963	2579	1.42703	-0.316198	2.47e-23	1.13e-22	0.0173862	0.0342033	RFX DNA-binding domain
PF02268	e_gw1.8.21.1	78853	524	0.717892	0.111568	0.00324494	0.00543766	0.557924	0.648133	Transcription initiation factor IIA, gamma subunit, helical domainTranscription initiation factor IIA, gamma subunit
PF02671	estExt_fgenesh1_pg.C_140152	142050	4247	-0.970076	-1.73235	3.73e-09	9.76e-09	8.75338e-29	7.61314e-28	PHD-fingerPaired amphipathic helix repeat
PF02671	estExt_Genewise1Plus.C_13_t10051	100644	5711	0.0741893	-0.368752	0.284916	0.347371	2.7554e-11	1.31775e-10	Paired amphipathic helix repeatSin3 family co-repressor
PF02791	gw1.36.89.1	56510	3421	0.796641	-0.239951	7.29e-10	2e-09	0.0422058	0.0753855	DDT domain
PF02891	e_gw1.36.94.1	92091	2109	0.0329214	-0.156859	0.77605	0.813064	0.170968	0.252616	MIZ/SP-RING zinc finger
PF02891	gm1.6978_g	11422	975	2.50901	0.266075	0.0763672	0.105002	0.740996	0.803042	MIZ/SP-RING zinc finger
PF02891	estExt_Genewise1.C_250221	115134	1257	-0.224646	0.501398	0.452526	0.525708	0.0918372	0.149203	MIZ/SP-RING zinc finger
PF03343	estExt_Genewise1Plus.C_1_t30103	94242	2128	0.0523767	-0.638658	0.675582	0.722078	4.23384e-10	1.86749e-09	SART-1 family
PF03660	fgenesh1_pm.1_#_247	125833	587	2.8657	-0.374803	1.56e-28	8.29e-28	0.00655718	0.0140236	PHF5-like protein
PF03847	estExt_fgenesh1_pm.C_70192	136967	2669	0.987115	0.216479	8.36e-15	2.88e-14	0.0464028	0.0819488	Transcription initiation factor TFIID subunit A
PF03849	e_gw1.7.1075.1	77565	1559	0.303561	-0.321756	0.0493868	0.0703233	0.0213174	0.0410982	Transcription factor Tfb2
PF03914	estExt_fgenesh1_pm.C_2_t20201	136075	1785	0.70146	-0.404877	6.55e-06	1.4e-05	0.00514112	0.0112393	CBF/Mak21 family
PF03914	e_gw1.9.321.1	80161	3217	0.153474	-0.304984	0.255818	0.316853	0.0124785	0.0252021	CBF/Mak21 family
PF04054	gm1.8487_g	12931	6816	0.224644	-0.0866118	2.09e-05	4.3e-05	0.0624408	0.106336	CCR4-Not complex component, Not1
PF04153	estExt_fgenesh1_pm.C_2_t10415	135927	4675	0.890062	0.0498964	1.47e-16	5.39e-16	0.56432	0.653349	CobW/HypB/UreG, nucleotide-binding domainNOT2 / NOT3 / NOT5 family
PF04153	estExt_Genemark1.C_260019	26486	2524	0.669741	0.118862	3.92e-14	1.31e-13	0.161076	0.240187	Not1 N-terminal domain, CCR4-Not complex componentNOT2 / NOT3 / NOT5 family
PF04218	fgenesh1_pm.2_#_476	127151	1757	1.37851	2.86977	9.08e-05	0.000177284	3.08358e-63	4.65505e-62	CENP-B N-terminal DNA-binding domainPF09091
PF04299	e_gw1.41.34.1	92619	795	1.4028	0.671975	0.00113037	0.00199351	0.00323408	0.00731025	Putative FMN-binding domain
PF04516	fgenesh1_pm.7_#_344	129671	2489	-0.55808	-0.451684	3.89e-13	1.25e-12	8.81368e-08	3.31822e-07	CP2 transcription factor
PF04855	estExt_Genemark1.C_1_t10329	23226	2350	0.916318	0.316474	5.29e-12	1.61e-11	0.00210424	0.00491361	SNF5 / SMARCB1 / INI1
PF04910	estExt_fgenesh1_pm.C_210082	138649	2295	-0.315442	0.049582	0.010122	0.0159944	0.744504	0.805994	Transcriptional repressor TCF25
PF05179	estExt_Genewise1Plus.C_1_t10164	93763	1786	-0.11141	0.280829	0.378454	0.4491	0.0187851	0.0366281	RNA pol II accessory factor, Cdc73 family, C-terminal
PF05224	estExt_Genewise1.C_13_t20057	112541	2191	0.109069	-0.405262	0.263514	0.323267	2.02396e-09	8.54458e-09	NDT80 / PhoG like DNA-binding family
PF05224	e_gw1.2.1998.1	71849	1437	1.0902	-0.242237	0.0352004	0.0513501	0.431532	0.539794	NDT80 / PhoG like DNA-binding family
PF05224	fgenesh1_pm.1_#_24	125610	2046	0.0437669	2.3802	0.597976	0.65385	2.5977e-159	9.03726e-158	NDT80 / PhoG like DNA-binding family
PF05764	e_gw1.36.98.1	91970	2275	1.74373	0.315167	1.78e-05	3.7e-05	0.345572	0.45367	YL1 nuclear proteinYL1 nuclear protein C-terminal domain
PF07093	fgenesh1_pm.7_#_392	129719	1917	2.28255	0.225067	3.06e-06	6.7e-06	0.439704	0.547721	SGT1 protein
PF07544	e_gw1.29.216.1	90617	562	1.1114	0.0911942	0.00136188	0.00238106	0.792028	0.844891	RNA polymerase II transcription mediator complex subunit 9
PF07716	estExt_Genewise1Plus.C_1_t30329	94364	1795	1.2034	-0.139716	1.22e-95	1.51e-94	0.00703498	0.0149384	Basic region leucine zipper
PF07716	fgenesh1_pm.5_#_157	128619	1437	-0.121784	0.66835	9.56e-05	0.000186019	2.03034e-107	4.6164e-106	Basic region leucine zipper
PF07741	fgenesh1_pg.1_#_561	32072	2202	2.28277	0.563148	1.59e-28	8.4e-28	0.000567484	0.00144351	Transcription factor TFIIB repeatBrf1-like TBP-binding domain
PF07975	estExt_fgenesh1_pm.C_100211	137503	1771	0.413392	0.551357	0.0159744	0.0245197	0.000107138	0.000299985	Ssl1-likeTFIIH C1-like domain
PF08164	fgenesh1_pg.7_#_16	34848	1720	0.0543398	-0.997908	0.759956	0.798313	2.92644e-08	1.13739e-07	Apoptosis-antagonizing transcription factor, C-terminal
PF096	estExt_Genewise1Plus.C_3_t30133	96562	3353	0.120294	-2.74496	0.69488	0.739583	1.86023e-07	6.80418e-07	Zinc finger, C2H2 type
PF096	e_gw1.8.229.1	79514	1130	-2.80105	-2.367	1.27e-149	2.17e-148	3.56288e-178	1.36243e-176	Zinc finger, C2H2 type
PF096	estExt_Genemark1.C_90031	24974	1959	-1.68634	-2.22538	0	0	0	0	Zinc finger, C2H2 type
PF096	e_gw1.21.247.1	87655	3671	0.387023	-2.22047	0.0772492	0.106087	8.13532e-75	1.41246e-73	Zinc finger, C2H2 type
PF096	estExt_Genewise1.C_9_t10222	110866	1063	-0.788384	-1.72367	1.58e-25	7.67e-25	8.12256e-228	3.9354e-226	Zinc finger, C2H2 type
PF096	estExt_fgenesh1_pm.C_3_t10234	136211	4965	-1.10157	-1.44668	4.32e-40	2.88e-39	4.41266e-67	6.94469e-66	Zinc finger, C2H2 type
PF096	estExt_Genewise1Plus.C_1_t50002	94636	2515	-1.35553	-1.16814	1.44e-168	2.67e-167	3.05078e-105	6.83582e-104	Zinc finger, C2H2 type
PF096	gw1.16.39.1	41630	1426	1.05126	-1.14474	0.00259592	0.00439124	2.32264e-05	7.00349e-05	Zinc finger, C2H2 type
PF096	e_gw1.29.33.1	90619	1430	-0.771431	-1.05053	3.3e-73	3.36e-72	1.1493e-222	5.39877e-221	Zinc finger, C2H2 type
PF096	fgenesh1_pm.42_#_18	134910	1779	-2.04537	-0.990125	0	0	0	0	Zinc finger, C2H2 type
PF096	estExt_Genewise1Plus.C_18_t10186	102140	3274	-1.03557	-0.897312	1.66e-79	1.79e-78	4.41522e-70	7.21881e-69	Zinc finger, C2H2 type
PF096	estExt_fgenesh2_kg.C_40040	122509	2014	-1.42745	-0.832952	2.43e-168	4.5e-167	2.93142e-53	3.94867e-52	Zinc finger, C2H2 type
PF096	estExt_fgenesh1_pg.C_90040	141391	2571	-0.814855	-0.795451	3.99e-48	3e-47	9.51224e-51	1.23114e-49	Zinc finger, C2H2 type
PF096	estExt_Genewise1Plus.C_3_t10374	96242	2660	0.967402	-0.759119	3.98e-27	2.03e-26	8.87586e-18	5.63355e-17	Zinc finger, C2H2 type
PF096	estExt_fgenesh2_kg.C_30086	122363	1886	0.28789	-0.495479	1.39e-17	5.28e-17	4.57194e-58	6.48907e-57	Zinc finger, C2H2 type
PF096	estExt_Genewise1.C_10_t10161	111209	1716	-0.855384	-0.422542	2.61e-06	5.73e-06	0.026253	0.0494998	Zinc finger, C2H2 type
PF096	estExt_Genewise1Plus.C_13_t10248	100749	2455	0.459356	-0.406385	1.88e-08	4.73e-08	5.15732e-08	1.96808e-07	Zinc finger, C2H2 type
PF096	estExt_Genemark1.C_70293	24736	1822	0.419152	-0.346506	3.25e-11	9.51e-11	6.34402e-13	3.30003e-12	Zinc finger, C2H2 type
PF096	estExt_Genewise1.C_1_t40460	106201	1210	1.66742	-0.334775	1.04e-07	2.5e-07	0.22104	0.314645	Zinc finger, C2H2 typeDnaJ domain
PF096	estExt_fgenesh1_pm.C_1_t10183	135291	1428	0.0928022	-0.311099	0.471248	0.545303	0.00468624	0.0103327	Zinc finger, C2H2 type
PF096	e_gw1.18.407.1	85751	1356	8.78136	-0.222392	0.033845	0.049619	0.820926	0.868311	Zinc finger, C2H2 type
PF096	e_gw1.5.435.1	75242	2285	-0.0114886	0.0211914	0.906364	0.931186	0.847196	0.890094	Zinc finger, C2H2 type
PF096	e_gw1.41.105.1	92664	2643	0.234711	0.12216	0.000246118	0.00046241	0.0141926	0.0283914	Zinc finger, C2H2 type
PF096	e_gw1.17.403.1	85532	2054	0.159391	0.12983	0.00964688	0.0152994	0.00135672	0.00326105	Zinc finger, C2H2 type
PF096	e_gw1.41.38.1	92689	1677	0.486251	0.147521	7.48e-05	0.000147186	0.158595	0.236907	Zinc finger, C2H2 type
PF096	estExt_Genewise1Plus.C_4_t20383	97050	6072	1.08884	0.298055	5.53e-13	1.76e-12	0.0198265	0.0383998	Zinc finger, C2H2 typeFungal Zn(2)-Cys(6) binuclear cluster domainalpha/beta hydrolase fold
PF096	e_gw1.5.287.1	75918	2102	1.13911	0.381328	5.76e-07	1.32e-06	0.0196718	0.038164	Zinc finger, C2H2 typeimpB/mucB/samB family
PF096	estExt_fgenesh2_kg.C_260004	124907	1258	-0.395511	0.427465	1.25e-06	2.8e-06	8.48764e-06	2.68896e-05	Zinc finger, C2H2 type
PF096	estExt_Genewise1Plus.C_2_t30456	95791	2564	-2.76174	0.460211	0	0	1.26827e-07	4.70214e-07	Zinc finger, C2H2 type
PF096	fgenesh1_pg.4_#_136	33789	3709	-0.205584	0.488608	0.00416486	0.00690056	3.2628e-14	1.8091e-13	Zinc finger, C2H2 type
PF096	e_gw1.13.198.1	83145	3402	0.654067	0.500074	3.24e-07	7.54e-07	6.8e-07	2.36568e-06	Zinc finger, C2H2 type
PF096	estExt_Genewise1Plus.C_1_t40363	94566	1165	0.306952	0.520102	0.00643302	0.0104311	1.51061e-08	5.99967e-08	Zinc finger, C2H2 type
PF096	e_gw1.6.1246.1	76540	1662	1.16884	0.528637	7.14e-08	1.73e-07	0.000144617	0.000399728	HomeodomainZinc finger, C2H2 type
PF096	e_gw1.5.552.1	75469	1167	-0.671377	0.55993	0.04902	0.0698338	0.0152114	0.0302332	Zinc finger, C2H2 type
PF096	estExt_Genemark1.C_2_t10326	23706	3784	-0.812871	0.576301	4.11e-49	3.13e-48	1.13266e-44	1.32847e-43	Zinc finger, C2H2 type
PF096	e_gw1.1.2887.1	69545	3167	0.642106	0.628031	0.160266	0.207614	0.061069	0.10421	HomeodomainZinc finger, C2H2 type
PF096	estExt_Genewise1Plus.C_12_t10402	100508	1115	0.723707	0.674413	0.0038711	0.00643255	2.26062e-05	6.83206e-05	Zinc finger, C2H2 type
PF096	estExt_fgenesh1_pm.C_90091	137297	3486	1.41878	0.737648	1.48e-25	7.18e-25	6.73736e-21	4.79596e-20	Zinc finger, C2H2 type
PF096	e_gw1.13.222.1	83240	1356	-2.53259	0.765777	3.7e-209	7.78e-208	2.17454e-13	1.15917e-12	Zinc finger, C2H2 type
PF096	e_gw1.14.27.1	83396	876	0.0790937	0.876577	0.680202	0.726335	1.14083e-17	7.18177e-17	Zinc finger, C2H2 type
PF096	estExt_fgenesh1_pm.C_2_t10418	135928	2914	1.92678	0.904127	1.4e-21	6.07e-21	3.41482e-10	1.51562e-09	Zinc finger, C2H2 typeSTE like transcription factor
PF096	gw1.2.1340.1	58302	3297	0.91397	0.915427	4.37e-13	1.4e-12	5.48e-19	3.6962e-18	Zinc finger, C2H2 type
PF096	estExt_fgenesh1_pg.C_80085	141272	3861	-0.192373	0.979685	0.0425208	0.0612063	8.10678e-24	6.26212e-23	HomeodomainZinc finger, C2H2 type
PF096	fgenesh1_pg.11_#_97	36127	2568	0.023	1.06052	0.868896	0.897446	2.36312e-30	2.13558e-29	Zinc finger, C2H2 type
PF096	e_gw1.6.881.1	77359	4021	2.44931	1.14062	7.58e-09	1.94e-08	1.0983e-06	3.7518e-06	Zinc finger, C2H2 type
PF096	gm1.1701_g	6145	1271	1.34892	1.18743	3.44e-06	7.51e-06	8.88898e-10	3.85648e-09	Zinc finger, C2H2 type
PF096	estExt_fgenesh1_pm.C_40361	136493	1922	-1.58887	1.68699	5.11e-102	6.65e-101	4.58202e-155	1.52525e-153	Zinc finger, C2H2 type
PF096	gw1.8.646.1	60093	476	-8.67948	2.38904	0.486706	0.557108	0.11419	0.180142	Zinc finger, C2H2 type
PF1125	e_gw1.1.1307.1	68272	535	1.30103	-0.00169082	5.62e-21	2.39e-20	0.961246	0.979127	G10 protein
PF1285	gm1.5135_g	9579	2740	0.207442	-1.18107	0.62374	0.676102	2.65358e-05	7.93416e-05	TEA/ATTS domain
PF1381	estExt_fgenesh2_kg.C_110045	123634	876	-0.651859	-0.418071	6.35e-128	9.64e-127	3.19404e-53	4.29617e-52	Helix-turn-helixMultiprotein bridging factor 1
PF1388	gm1.3647_g	8091	3237	-1.10439	-0.260743	3.89e-74	3.99e-73	3.4587e-05	0.000102226	ARID/BRIGHT DNA binding domain
PF1388	e_gw1.14.50.1	83470	2910	1.44113	-0.225292	1.67e-06	3.72e-06	0.258622	0.356834	ARID/BRIGHT DNA binding domainRap1 Myb domain
PF1388	gm1.3206_g	7650	5500	-0.0614005	-0.124539	0.502322	0.56969	0.0839044	0.137376	PHD-fingerARID/BRIGHT DNA binding domainJmjC domain, hydroxylasejmjN domainPLU-1-like protein
PF1388	fgenesh1_pg.3_#_240	33362	2981	0.639074	-0.106147	7.21e-06	1.54e-05	0.308924	0.413657	ARID/BRIGHT DNA binding domain
PF170	gm1.5580_g	10024	804	-2.06679	-5.60428	5.84e-06	1.25e-05	2.84014e-14	1.57759e-13	bZIP transcription factor
PF170	estExt_Genewise1Plus.C_3_t30098	96554	1430	-3.24447	-1.67217	1.34e-68	1.29e-67	6.1186e-31	5.62279e-30	bZIP transcription factor
PF170	fgenesh1_pg.16_#_39	37164	1950	0.0853321	-0.509091	0.253226	0.313813	5.0538e-24	3.92677e-23	bZIP transcription factor
PF170	estExt_Genewise1Plus.C_290276	104197	1489	-1.06834	-0.478032	6.36e-31	3.55e-30	5.69012e-09	2.33509e-08	bZIP transcription factor
PF170	estExt_fgenesh1_pg.C_80200	141332	2021	-0.71566	-0.364991	5.01e-242	1.18e-240	5.63858e-82	1.052e-80	bZIP transcription factor
PF170	estExt_fgenesh2_kg.C_140023	123975	1076	0.137427	-0.316637	1.18e-18	4.65e-18	6.62028e-115	1.58715e-113	bZIP transcription factor
PF170	estExt_Genewise1.C_6_t20024	109466	1830	-0.270767	-0.294479	0.00250128	0.00424217	0.000153497	0.000422882	bZIP transcription factor
PF170	e_gw1.6.377.1	76558	770	-1.75269	-0.114054	9.02e-113	1.26e-111	0.0718694	0.119985	bZIP transcription factor
PF170	estExt_fgenesh1_pm.C_130172	137894	2708	0.755845	0.0595417	9.77e-97	1.23e-95	0.0148532	0.0295913	bZIP transcription factorTranscription factor PAP1
PF170	e_gw1.2.541.1	70641	2017	3.37697	0.18188	0	0	2.05196e-05	6.22381e-05	bZIP transcription factor
PF170	e_gw1.54.25.1	93496	1146	1.00658	0.464282	1.25e-32	7.27e-32	3.76518e-14	2.08516e-13	bZIP transcription factor
PF170	gm1.6537_g	10981	1911	-0.415037	0.634716	0.0387316	0.0561867	0.0399802	0.0718123	bZIP transcription factor
PF170	estExt_Genewise1.C_1_t10425	105484	1874	0.798421	0.768919	2.12e-10	5.98e-10	7.62268e-25	6.06016e-24	bZIP transcription factor
PF170	e_gw1.1.317.1	68055	546	-0.0614005	2.36737	0.979924	0.988272	0.11419	0.180357	bZIP transcription factor
PF172	e_gw1.22.33.1	87882	2465	-7.02237	-2.23704	0.240096	0.299578	0.136573	0.207869	Fungal Zn(2)-Cys(6) binuclear cluster domainFungal specific transcription factor domain
PF172	e_gw1.32.66.1	91315	2069	6.90689	-1.89308	0.260174	0.32068	0.235142	0.331809	Fungal Zn(2)-Cys(6) binuclear cluster domain
PF172	e_gw1.1.2873.1	67567	1661	-0.0458037	-1.80735	0.96707	0.981607	0.0412378	0.073799	Fungal Zn(2)-Cys(6) binuclear cluster domain
PF172	fgenesh1_pm.31_#_66	134352	2178	7.40939	-1.72583	0.131828	0.174241	0.12188	0.189878	Fungal Zn(2)-Cys(6) binuclear cluster domainFungal specific transcription factor domain
PF172	estExt_Genewise1Plus.C_250130	103464	2310	0.816215	-1.53554	1.76e-09	4.72e-09	3.62536e-25	2.90217e-24	Fungal Zn(2)-Cys(6) binuclear cluster domainAT hook motif
PF172	e_gw1.8.569.1	78902	820	0.20904	-1.53239	0.254364	0.31518	1.90811e-05	5.81226e-05	Fungal Zn(2)-Cys(6) binuclear cluster domain
PF172	gw1.5.649.1	56646	340	-	-0.934905	-	-	0.650784	0.729275	Fungal Zn(2)-Cys(6) binuclear cluster domain
PF172	e_gw1.5.922.1	75196	1500	-	-0.917538	-	-	0.650784	0.728129	Fungal Zn(2)-Cys(6) binuclear cluster domain
PF172	fgenesh1_pg.18_#_67	37575	2214	-1.72678	-0.855733	0	0	8.52272e-169	3.10509e-167	Fungal Zn(2)-Cys(6) binuclear cluster domain
PF172	estExt_fgenesh1_pg.C_150011	142081	1543	-0.295456	-0.842742	0.0257348	0.0383519	1.84815e-10	8.35506e-10	Fungal Zn(2)-Cys(6) binuclear cluster domain
PF172	estExt_Genewise1Plus.C_5_t10332	97324	3563	1.16163	-0.807847	4.13e-20	1.71e-19	1.81365e-23	1.38478e-22	Fungal Zn(2)-Cys(6) binuclear cluster domainFungal specific transcription factor domain
PF172	estExt_fgenesh1_pg.C_50296	140849	2883	0.743022	-0.717909	4.26e-16	1.54e-15	6.09158e-32	5.7114e-31	Fungal Zn(2)-Cys(6) binuclear cluster domain
PF172	gw1.3.800.1	53248	1961	1.72886	-0.710568	8.77e-22	3.83e-21	1.483e-09	6.33595e-09	Fungal Zn(2)-Cys(6) binuclear cluster domain
PF172	estExt_fgenesh1_pm.C_50302	136656	1604	-0.622371	-0.694292	4.77e-08	1.17e-07	6.44676e-13	3.35159e-12	Fungal Zn(2)-Cys(6) binuclear cluster domain
PF172	estExt_fgenesh1_pm.C_1_t10275	135338	2086	-1.29728	-0.692224	1.37e-52	1.1e-51	1.07358e-08	4.31764e-08	Fungal Zn(2)-Cys(6) binuclear cluster domain
PF172	estExt_Genewise1Plus.C_440032	105117	2779	-0.104794	-0.660549	0.00168618	0.00291896	0	0	Fungal Zn(2)-Cys(6) binuclear cluster domain
PF172	gw1.4.642.1	53261	1508	3.42196	-0.656332	1.42e-09	3.84e-09	0.0035336	0.0079311	Fungal Zn(2)-Cys(6) binuclear cluster domain
PF172	estExt_Genemark1.C_280108	26638	2796	-1.4695	-0.6499	1.11e-225	2.47e-224	4.90348e-42	5.51358e-41	Fungal Zn(2)-Cys(6) binuclear cluster domainFungal specific transcription factor domain
PF172	fgenesh1_pm.4_#_191	128194	3272	0.411955	-0.626298	0.00152682	0.00265569	2.37376e-15	1.37896e-14	Fungal Zn(2)-Cys(6) binuclear cluster domain
PF172	e_gw1.16.454.1	85090	2191	0.715724	-0.544842	0.00885684	0.0140832	0.00314816	0.00712649	Fungal Zn(2)-Cys(6) binuclear cluster domain
PF172	fgenesh1_pm.22_#_29	133109	1750	-0.139854	-0.532701	0.244276	0.303754	7.30302e-05	0.000207881	Fungal Zn(2)-Cys(6) binuclear cluster domain
PF172	fgenesh1_pg.1_#_884	32395	1026	-0.435522	-0.459162	0.000266288	0.000498456	0.00250534	0.00578742	Fungal Zn(2)-Cys(6) binuclear cluster domain
PF172	gm1.4683_g	9127	2372	0.464894	-0.420058	0.0074111	0.0118943	0.000341028	0.000899622	Fungal Zn(2)-Cys(6) binuclear cluster domain
PF172	gw1.3.1090.1	58034	2155	-1.06711	-0.406383	0.322232	0.388194	0.269802	0.367655	Fungal Zn(2)-Cys(6) binuclear cluster domain
PF172	e_gw1.1.212.1	68701	2013	0.438884	-0.369885	0.00347876	0.00580494	0.0156277	0.0309676	Fungal Zn(2)-Cys(6) binuclear cluster domain
PF172	estExt_fgenesh1_pm.C_1_t10072	135234	2558	-0.2478	-0.347923	0.058591	0.082349	0.0151629	0.0301499	Fungal Zn(2)-Cys(6) binuclear cluster domainFungal specific transcription factor domain
PF172	e_gw1.27.164.1	89793	2502	1.37539	-0.317482	4.5e-08	1.1e-07	0.097795	0.15783	Fungal Zn(2)-Cys(6) binuclear cluster domainFungal specific transcription factor domain
PF172	e_gw1.31.234.1	91236	2168	-1.19314	-0.285598	1.01e-239	2.36e-238	2.55328e-10	1.14422e-09	Fungal Zn(2)-Cys(6) binuclear cluster domainFungal specific transcription factor domain
PF172	e_gw1.6.228.1	76432	1564	0.765535	-0.27711	0.414092	0.485513	0.70255	0.771679	Fungal Zn(2)-Cys(6) binuclear cluster domainFungal specific transcription factor domain
PF172	e_gw1.13.103.1	82728	2168	0.0214888	-0.276764	0.826028	0.85803	0.00266754	0.00613302	Fungal Zn(2)-Cys(6) binuclear cluster domain
PF172	gm1.739_g	5183	2343	4.48618	-0.260618	1.69e-33	1e-32	0.144588	0.218487	Fungal Zn(2)-Cys(6) binuclear cluster domainFungal specific transcription factor domain
PF172	fgenesh1_pm.21_#_81	133005	2561	1.80423	-0.258265	3.04e-10	8.51e-10	0.191246	0.278225	Fungal Zn(2)-Cys(6) binuclear cluster domainFungal specific transcription factor domain
PF172	e_gw1.7.188.1	78541	2721	1.70288	-0.228413	1.51e-34	9.16e-34	0.068839	0.115468	Fungal Zn(2)-Cys(6) binuclear cluster domainFungal specific transcription factor domain
PF172	estExt_Genemark1.C_110143	25292	3340	-2.79255	-0.227642	0	0	1.24177e-07	4.60573e-07	Fungal Zn(2)-Cys(6) binuclear cluster domainFungal specific transcription factor domain
PF172	fgenesh1_pm.1_#_781	126367	2965	0.744491	-0.224392	1.49e-11	4.44e-11	0.00674296	0.014381	Fungal Zn(2)-Cys(6) binuclear cluster domainFungal specific transcription factor domain
PF172	estExt_Genewise1Plus.C_360108	104702	4056	1.095	-0.215238	2.34e-28	1.23e-27	0.0107536	0.0220897	Fungal Zn(2)-Cys(6) binuclear cluster domainFungal specific transcription factor domain
PF172	e_gw1.48.31.1	93233	2136	0.377756	-0.211885	0.0812698	0.111357	0.155329	0.232856	Fungal Zn(2)-Cys(6) binuclear cluster domain
PF172	estExt_Genewise1Plus.C_6_t20122	97880	2318	-0.57321	-0.201576	2.07e-09	5.54e-09	0.00417584	0.00928031	Fungal Zn(2)-Cys(6) binuclear cluster domainFungal specific transcription factor domain
PF172	e_gw1.1.1601.1	69215	1838	3.35755	-0.197037	0.0039632	0.00658199	0.820926	0.868211	Fungal Zn(2)-Cys(6) binuclear cluster domain
PF172	e_gw1.7.87.1	78051	442	-0.767372	-0.186566	3.34e-07	7.76e-07	0.108663	0.172778	Fungal Zn(2)-Cys(6) binuclear cluster domain
PF172	fgenesh1_pg.50_#_20	39947	2070	2	-0.169281	5.3e-06	1.14e-05	0.601148	0.68527	Fungal Zn(2)-Cys(6) binuclear cluster domain
PF172	gm1.4775_g	9219	4069	0.536252	-0.154715	9.67e-22	4.22e-21	0.000572148	0.00145498	Fungal Zn(2)-Cys(6) binuclear cluster domain
PF172	e_gw1.5.159.1	75948	916	2.28794	-0.140491	4.04e-13	1.29e-12	0.36019	0.468541	Fungal Zn(2)-Cys(6) binuclear cluster domain
PF172	fgenesh1_pg.19_#_94	37769	2363	0.866202	-0.135027	0.0061615	0.00999969	0.653628	0.729635	Fungal Zn(2)-Cys(6) binuclear cluster domainFungal specific transcription factor domain
PF172	fgenesh1_pg.6_#_51	34476	2823	1.74059	-0.120151	7.46e-19	2.95e-18	0.442362	0.550662	Fungal Zn(2)-Cys(6) binuclear cluster domainFungal specific transcription factor domain
PF172	e_gw1.6.456.1	76687	1334	1.29278	-0.0995357	0.306984	0.371248	0.884328	0.922196	Fungal Zn(2)-Cys(6) binuclear cluster domain
PF172	fgenesh1_pm.30_#_78	134241	2329	2.87732	-0.0967532	4.98e-06	1.07e-05	0.799284	0.849497	Fungal Zn(2)-Cys(6) binuclear cluster domainFungal specific transcription factor domain
PF172	e_gw1.5.768.1	75696	1625	1.42421	-0.0773589	1.31e-05	2.75e-05	0.775142	0.831382	Fungal Zn(2)-Cys(6) binuclear cluster domain
PF172	e_gw1.10.583.1	80499	2501	2.33985	-0.0748872	0.0031169	0.00523176	0.802842	0.852398	Fungal Zn(2)-Cys(6) binuclear cluster domain
PF172	e_gw1.8.160.1	79489	3269	1.00561	-0.0665382	3e-09	7.91e-09	0.614232	0.697522	Fungal Zn(2)-Cys(6) binuclear cluster domain
PF172	estExt_Genemark1.C_150151	25762	3063	4.48252	-0.0648839	0	0	0.0607706	0.103778	Fungal Zn(2)-Cys(6) binuclear cluster domainFungal specific transcription factor domain
PF172	e_gw1.48.24.1	93216	552	1.73941	-0.0554951	0.0127172	0.0198579	0.88683	0.923973	Fungal Zn(2)-Cys(6) binuclear cluster domain
PF172	e_gw1.9.47.1	80145	2787	1.68846	-0.0395975	7.72e-198	1.58e-196	0.34723	0.455653	Fungal Zn(2)-Cys(6) binuclear cluster domainFungal specific transcription factor domain
PF172	e_gw1.11.319.1	81339	1257	2.36878	-0.0138437	3.6e-08	8.86e-08	0.953786	0.974963	Fungal Zn(2)-Cys(6) binuclear cluster domain
PF172	estExt_fgenesh1_pg.C_90064	141402	3900	0.30708	0.0275377	4.68e-06	1.01e-05	0.569828	0.659066	Fungal Zn(2)-Cys(6) binuclear cluster domainFungal specific transcription factor domain
PF172	gm1.1497_g	5941	2046	1.58981	0.0300921	3.26e-12	1e-11	0.864216	0.905201	Fungal Zn(2)-Cys(6) binuclear cluster domain
PF172	e_gw1.2.1120.1	70883	2189	-0.125887	0.0503083	0.381964	0.453029	0.643866	0.723714	Fungal Zn(2)-Cys(6) binuclear cluster domain
PF172	estExt_fgenesh1_pg.C_80056	141251	2892	1.29631	0.0610368	5.96e-14	1.98e-13	0.63057	0.711795	Fungal Zn(2)-Cys(6) binuclear cluster domainFungal specific transcription factor domain
PF172	e_gw1.17.95.1	85465	1976	1.35459	0.0714351	0.000845894	0.00150668	0.773838	0.830176	Fungal Zn(2)-Cys(6) binuclear cluster domain
PF172	gw1.2.212.1	42772	1763	0.195375	0.0761896	0.461622	0.535183	0.78255	0.83758	Fungal Zn(2)-Cys(6) binuclear cluster domainFungal specific transcription factor domain
PF172	fgenesh1_pm.1_#_511	126097	2517	1.28813	0.083485	0.000906388	0.00160908	0.789574	0.842856	Fungal Zn(2)-Cys(6) binuclear cluster domainFungal specific transcription factor domain
PF172	e_gw1.23.218.1	88425	1950	1.53586	0.0963127	6.53e-09	1.68e-08	0.601052	0.685245	Fungal Zn(2)-Cys(6) binuclear cluster domain
PF172	estExt_Genemark1.C_160004	25786	2407	0.810714	0.104536	1.56e-08	3.94e-08	0.25439	0.351677	Fungal Zn(2)-Cys(6) binuclear cluster domain
PF172	fgenesh1_pm.6_#_240	129106	2641	1.19552	0.105238	9.45e-16	3.36e-15	0.408202	0.517466	Fungal Zn(2)-Cys(6) binuclear cluster domainFungal specific transcription factor domain
PF172	e_gw1.4.373.1	74630	2311	1.15024	0.105493	0.0738842	0.101865	0.793072	0.845225	Fungal Zn(2)-Cys(6) binuclear cluster domain
PF172	gm1.6086_g	10530	3439	0.903528	0.144561	2e-17	7.54e-17	0.0394152	0.0708662	Fungal Zn(2)-Cys(6) binuclear cluster domainFungal specific transcription factor domain
PF172	e_gw1.6.327.1	76649	2158	1.94708	0.148623	2.49e-09	6.62e-09	0.357584	0.466002	Fungal Zn(2)-Cys(6) binuclear cluster domainFungal specific transcription factor domain
PF172	e_gw1.7.1124.1	77614	2151	1.80735	0.163499	0.00170972	0.00295578	0.569044	0.658324	Fungal Zn(2)-Cys(6) binuclear cluster domainFungal specific transcription factor domain
PF172	fgenesh1_pm.17_#_113	132245	1851	2.79055	0.165778	1.19e-06	2.67e-06	0.620238	0.703048	Fungal Zn(2)-Cys(6) binuclear cluster domainFungal specific transcription factor domain
PF172	e_gw1.1.876.1	70232	722	1.55276	0.166942	0.0100114	0.0158362	0.777	0.832699	Fungal Zn(2)-Cys(6) binuclear cluster domain
PF172	estExt_fgenesh1_pm.C_170209	138343	1813	1.08891	0.17394	9.89e-14	3.24e-13	0.196075	0.284579	Fungal Zn(2)-Cys(6) binuclear cluster domain
PF172	e_gw1.4.33.1	74475	2364	0	0.222392	0.979924	0.987944	0.585906	0.674543	Fungal Zn(2)-Cys(6) binuclear cluster domainFungal specific transcription factor domain
PF172	estExt_Genewise1Plus.C_220403	103141	1870	2.07138	0.226509	1.41e-05	2.93e-05	0.479842	0.588062	Fungal Zn(2)-Cys(6) binuclear cluster domain
PF172	estExt_fgenesh2_kg.C_350003	125274	2366	1.49218	0.23398	2.97e-34	1.8e-33	0.00561496	0.0121688	Fungal Zn(2)-Cys(6) binuclear cluster domainFungal specific transcription factor domain
PF172	e_gw1.5.1028.1	75680	2309	0.66866	0.236858	0.0578064	0.0814849	0.31163	0.416738	Fungal Zn(2)-Cys(6) binuclear cluster domainFungal specific transcription factor domain
PF172	e_gw1.6.1068.1	76382	2336	-0.111929	0.24257	0.550722	0.606913	0.054909	0.0951372	Fungal Zn(2)-Cys(6) binuclear cluster domainFungal specific transcription factor domain
PF172	fgenesh1_pg.25_#_19	38577	1991	0.958699	0.252453	1.88e-11	5.55e-11	0.0309086	0.0571713	Fungal Zn(2)-Cys(6) binuclear cluster domainFungal specific transcription factor domain
PF172	e_gw1.1.422.1	70016	1979	0.367851	0.257407	0.00286928	0.0048366	0.0216028	0.0416051	Fungal Zn(2)-Cys(6) binuclear cluster domain
PF172	e_gw1.1.1225.1	67847	2440	0.965617	0.260652	0.000156966	0.000299101	0.157504	0.235505	Fungal Zn(2)-Cys(6) binuclear cluster domainFungal specific transcription factor domain
PF172	e_gw1.43.74.1	92887	1477	0.37752	0.262036	0.337828	0.405376	0.505596	0.60387	Fungal Zn(2)-Cys(6) binuclear cluster domain
PF172	estExt_fgenesh1_pm.C_450022	139531	3621	1.47461	0.263439	2.16e-36	1.35e-35	0.000925788	0.0022846	Fungal Zn(2)-Cys(6) binuclear cluster domainFungal specific transcription factor domain
PF172	gm1.8456_g	12900	2418	0.856702	0.272717	4.61e-11	1.34e-10	0.022922	0.0438446	Fungal Zn(2)-Cys(6) binuclear cluster domainFungal specific transcription factor domain
PF172	e_gw1.16.556.1	84791	3108	2.28357	0.274211	4.84e-65	4.52e-64	0.000342154	0.000902078	Fungal Zn(2)-Cys(6) binuclear cluster domainFungal specific transcription factor domain
PF172	gw1.3.847.1	54101	1543	0.762961	0.278641	0.0666456	0.0927261	0.280306	0.380456	Fungal Zn(2)-Cys(6) binuclear cluster domain
PF172	estExt_Genewise1Plus.C_13_t10380	100825	2879	-0.192645	0.286577	0.0298862	0.0440917	7.40038e-06	2.35337e-05	Fungal Zn(2)-Cys(6) binuclear cluster domain
PF172	fgenesh1_pm.20_#_173	132920	3004	1.43729	0.287103	1.23e-26	6.15e-26	0.000852924	0.00211607	Fungal Zn(2)-Cys(6) binuclear cluster domainFungal specific transcription factor domain
PF172	e_gw1.11.590.1	81935	1711	1.47216	0.291476	3.41e-27	1.74e-26	0.00707658	0.0150233	Fungal Zn(2)-Cys(6) binuclear cluster domain
PF172	e_gw1.25.191.1	89214	2088	2.00395	0.298056	2.84e-32	1.63e-31	0.0213366	0.0411266	Fungal Zn(2)-Cys(6) binuclear cluster domain
PF172	e_gw1.32.26.1	91287	3267	0.393619	0.330001	0.0268694	0.0399318	0.0139912	0.0280187	Fungal Zn(2)-Cys(6) binuclear cluster domainFungal specific transcription factor domain
PF172	gw1.33.158.1	59591	1917	-0.253921	0.331982	0.139063	0.181853	0.0203526	0.0393693	Fungal Zn(2)-Cys(6) binuclear cluster domainFungal specific transcription factor domain
PF172	gm1.1162_g	5606	2594	1.96617	0.348377	1.25e-13	4.09e-13	0.0408078	0.0731002	Fungal Zn(2)-Cys(6) binuclear cluster domainFungal specific transcription factor domain
PF172	fgenesh1_pg.13_#_11	36511	3352	0.340229	0.36445	0.00121685	0.002139	6.85212e-06	2.1888e-05	Fungal Zn(2)-Cys(6) binuclear cluster domain
PF172	fgenesh1_pm.29_#_14	134073	3365	1.57147	0.375867	5.63e-24	2.62e-23	5.4895e-05	0.000158749	Fungal Zn(2)-Cys(6) binuclear cluster domainFungal specific transcription factor domain
PF172	gm1.2673_g	7117	2376	0.364572	0.39973	0.0623946	0.0872242	0.018904	0.0368366	Fungal Zn(2)-Cys(6) binuclear cluster domainFungal specific transcription factor domain
PF172	estExt_fgenesh1_pm.C_270062	139021	3198	1.79391	0.403476	4.48e-17	1.67e-16	0.00488838	0.0107299	Fungal Zn(2)-Cys(6) binuclear cluster domainFungal specific transcription factor domain
PF172	estExt_Genewise1Plus.C_14_t10062	101004	2659	1.84639	0.418489	4.98e-19	1.98e-18	0.0051094	0.0111805	Fungal Zn(2)-Cys(6) binuclear cluster domainFungal specific transcription factor domain
PF172	estExt_Genewise1Plus.C_8_t10115	98754	2633	0.594361	0.419431	6.33e-06	1.35e-05	6.54394e-06	2.09397e-05	Fungal Zn(2)-Cys(6) binuclear cluster domainFungal specific transcription factor domain
PF172	fgenesh1_pm.17_#_99	132231	2387	2.11917	0.420293	1.68e-16	6.15e-16	0.0114066	0.0233224	Fungal Zn(2)-Cys(6) binuclear cluster domainFungal specific transcription factor domain
PF172	estExt_fgenesh1_pm.C_50035	136548	1346	0.333657	0.420691	0.27085	0.331819	0.0954952	0.154387	Fungal Zn(2)-Cys(6) binuclear cluster domain
PF172	e_gw1.1.2876.1	70203	1878	1.8375	0.423686	2.61e-13	8.44e-13	0.00534434	0.011645	Fungal Zn(2)-Cys(6) binuclear cluster domain
PF172	e_gw1.41.70.1	92679	2284	1.21624	0.42405	4.32e-06	9.36e-06	0.0148689	0.0296035	Fungal Zn(2)-Cys(6) binuclear cluster domain
PF172	e_gw1.8.366.1	78691	2469	1.97338	0.435551	1.96e-80	2.13e-79	3.48892e-06	1.14006e-05	Fungal Zn(2)-Cys(6) binuclear cluster domainFungal specific transcription factor domain
PF172	estExt_Genemark1.C_320029	26770	2107	0.616609	0.439047	3.07e-05	6.22e-05	0.000421418	0.00109269	Fungal Zn(2)-Cys(6) binuclear cluster domain
PF172	e_gw1.1.301.1	67733	2394	2.68891	0.445626	3.58e-06	7.81e-06	0.170703	0.252265	Fungal Zn(2)-Cys(6) binuclear cluster domainFungal specific transcription factor domain
PF172	gm1.2850_g	7294	2838	1.74454	0.446064	7.82e-05	0.000153513	0.21242	0.303964	Fungal Zn(2)-Cys(6) binuclear cluster domainFungal specific transcription factor domain
PF172	gm1.5899_g	10343	2516	1.74783	0.451398	3.46e-24	1.62e-23	0.00069221	0.00173832	Fungal Zn(2)-Cys(6) binuclear cluster domainFungal specific transcription factor domain
PF172	estExt_Genewise1Plus.C_2_t30365	95750	3618	-0.369177	0.472111	0.0104055	0.0164055	0.00158976	0.00378192	Fungal Zn(2)-Cys(6) binuclear cluster domainFungal specific transcription factor domain
PF172	gm1.8339_g	12783	3390	1.46781	0.473596	9.51e-12	2.85e-11	0.000392474	0.00102395	Fungal Zn(2)-Cys(6) binuclear cluster domain
PF172	fgenesh1_pm.18_#_105	132448	2633	1.23133	0.494655	1.32e-10	3.77e-10	0.00113614	0.00276317	Fungal Zn(2)-Cys(6) binuclear cluster domain
PF172	estExt_Genewise1Plus.C_15_t10026	101290	2509	3.6893	0.531788	2.57e-46	1.88e-45	3.38834e-08	1.31086e-07	Fungal Zn(2)-Cys(6) binuclear cluster domain
PF172	e_gw1.12.115.1	82581	1984	2.16784	0.531896	5.62e-19	2.23e-18	0.00291756	0.00664839	Fungal Zn(2)-Cys(6) binuclear cluster domain
PF172	fgenesh1_pg.7_#_18	34850	2905	1.52563	0.531916	5.83e-09	1.51e-08	0.00364682	0.00817135	Fungal Zn(2)-Cys(6) binuclear cluster domainFungal specific transcription factor domain
PF172	fgenesh1_pm.24_#_8	133387	1961	1.76646	0.542036	2.07e-13	6.73e-13	0.0631682	0.107258	Fungal Zn(2)-Cys(6) binuclear cluster domain
PF172	e_gw1.55.20.1	93534	1404	1.63826	0.543045	0.0113599	0.0178301	0.13514	0.206129	Fungal Zn(2)-Cys(6) binuclear cluster domainFungal specific transcription factor domain
PF172	e_gw1.16.252.1	84735	2670	2.45563	0.558106	5.36e-21	2.28e-20	0.000534686	0.00136458	Fungal Zn(2)-Cys(6) binuclear cluster domainFungal specific transcription factor domain
PF172	e_gw1.34.110.1	91798	2104	1.28951	0.55876	1.7e-05	3.52e-05	0.0120887	0.0245058	Fungal Zn(2)-Cys(6) binuclear cluster domainFungal specific transcription factor domain
PF172	e_gw1.5.31.1	76239	1719	0.678072	0.560673	0.00846878	0.0135299	0.00741144	0.0156695	Fungal Zn(2)-Cys(6) binuclear cluster domainFungal specific transcription factor domain
PF172	fgenesh1_pm.19_#_10	132548	2391	1.11201	0.577973	1.15e-25	5.6e-25	1.41842e-15	8.32344e-15	Fungal Zn(2)-Cys(6) binuclear cluster domainFungal specific transcription factor domain
PF172	estExt_fgenesh1_pm.C_120044	137718	3652	0.714416	0.581536	3.29e-17	1.24e-16	1.91613e-21	1.39074e-20	Fungal Zn(2)-Cys(6) binuclear cluster domain
PF172	fgenesh1_pm.4_#_263	128266	1730	-1.35646	0.584237	5.32e-07	1.22e-06	0.00564386	0.0122286	Fungal Zn(2)-Cys(6) binuclear cluster domain
PF172	estExt_Genewise1Plus.C_10_t20267	99896	3250	1.80847	0.58588	1.68e-28	8.9e-28	1.93873e-06	6.45129e-06	Fungal Zn(2)-Cys(6) binuclear cluster domainFungal specific transcription factor domain
PF172	estExt_Genemark1.C_1_t20246	23425	2626	2.20066	0.588669	6.59e-81	7.2e-80	5.6223e-13	2.93285e-12	Fungal Zn(2)-Cys(6) binuclear cluster domainFungal specific transcription factor domain
PF172	estExt_Genewise1Plus.C_220419	103144	1843	0.662965	0.591447	0.22759	0.2868	0.139749	0.212181	Fungal Zn(2)-Cys(6) binuclear cluster domain
PF172	estExt_Genewise1Plus.C_3_t10177	96150	3202	1.67503	0.591663	8.43e-57	7.16e-56	1.59778e-09	6.80433e-09	Fungal Zn(2)-Cys(6) binuclear cluster domainFungal specific transcription factor domain
PF172	gw1.12.186.1	46613	1470	4.82443	0.591983	4.39e-08	1.08e-07	0.139749	0.212146	Fungal Zn(2)-Cys(6) binuclear cluster domainFungal specific transcription factor domain
PF172	estExt_Genewise1.C_6_t20186	109517	2701	2.74617	0.592853	1.39e-301	3.83e-300	2.5393e-41	2.82776e-40	Fungal Zn(2)-Cys(6) binuclear cluster domainFungal specific transcription factor domain
PF172	estExt_fgenesh1_pg.C_340049	143150	1794	3.76081	0.617629	9.83e-13	3.09e-12	0.155913	0.233428	Fungal Zn(2)-Cys(6) binuclear cluster domainFungal specific transcription factor domain
PF172	estExt_Genewise1Plus.C_17_t20040	102019	2335	2.49985	0.624457	8.91e-54	7.3e-53	2.5313e-06	8.34806e-06	Fungal Zn(2)-Cys(6) binuclear cluster domainFungal specific transcription factor domain
PF172	fgenesh1_pm.41_#_2	134848	2142	2.2134	0.63941	1.77e-07	4.18e-07	0.173749	0.256398	Fungal Zn(2)-Cys(6) binuclear cluster domainFungal specific transcription factor domain
PF172	estExt_fgenesh1_pm.C_380032	139402	2583	1.60602	0.641666	8.69e-19	3.42e-18	1.2607e-05	3.90708e-05	Fungal Zn(2)-Cys(6) binuclear cluster domainFungal specific transcription factor domain
PF172	estExt_Genemark1.C_1_t10198	23164	2581	1.79508	0.662642	4.26e-18	1.65e-17	3.3123e-08	1.28251e-07	Fungal Zn(2)-Cys(6) binuclear cluster domain
PF172	estExt_Genewise1Plus.C_1_t30483	94420	2836	-0.0378592	0.662712	0.55784	0.614015	1.0203e-18	6.79762e-18	Fungal Zn(2)-Cys(6) binuclear cluster domainFungal specific transcription factor domain
PF172	e_gw1.29.158.1	90629	3195	0.516306	0.665096	0.007225	0.0116325	1.53754e-10	6.99872e-10	Fungal Zn(2)-Cys(6) binuclear cluster domain
PF172	e_gw1.1.2741.1	67471	1566	2.74543	0.679114	0.00280158	0.00472773	0.0985838	0.158605	Fungal Zn(2)-Cys(6) binuclear cluster domain
PF172	estExt_Genewise1Plus.C_7_t20280	98455	2842	-0.825074	0.686251	3.66e-303	1.02e-301	1.74406e-120	4.37385e-119	Fungal Zn(2)-Cys(6) binuclear cluster domainFungal specific transcription factor domain
PF172	e_gw1.26.152.1	89588	2911	2.0288	0.694261	1.26e-06	2.83e-06	0.0523506	0.0913889	Fungal Zn(2)-Cys(6) binuclear cluster domain
PF172	e_gw1.6.1163.1	76518	1272	1.49226	0.70031	5.93e-08	1.44e-07	0.000378978	0.00099294	Fungal Zn(2)-Cys(6) binuclear cluster domain
PF172	fgenesh1_pm.7_#_383	129710	2085	0.446178	0.701619	0.0227948	0.034324	9.38486e-07	3.22733e-06	Fungal Zn(2)-Cys(6) binuclear cluster domain
PF172	estExt_Genewise1.C_6_t10183	109343	2779	-0.602408	0.714379	0.0910618	0.124009	0.000127582	0.000355082	Fungal Zn(2)-Cys(6) binuclear cluster domain
PF172	e_gw1.12.485.1	81999	1248	6.72768	0.732401	0	0	4.16094e-260	2.27842e-258	Fungal Zn(2)-Cys(6) binuclear cluster domain
PF172	e_gw1.2.850.1	71585	2473	1.18972	0.733925	6.27e-15	2.18e-14	1.53943e-13	8.26806e-13	Fungal Zn(2)-Cys(6) binuclear cluster domainFungal specific transcription factor domain
PF172	e_gw1.1.829.1	67800	2712	0.435661	0.739617	0.000563428	0.00102173	3.02122e-18	1.97168e-17	Fungal Zn(2)-Cys(6) binuclear cluster domainFungal specific transcription factor domain
PF172	gw1.17.569.1	67125	1917	3.07068	0.797507	2.61e-51	2.06e-50	1.55146e-08	6.14868e-08	Fungal Zn(2)-Cys(6) binuclear cluster domainFungal specific transcription factor domain
PF172	e_gw1.3.1675.1	72994	1958	2.43839	0.808481	1.78e-18	6.94e-18	0.00116013	0.0028178	Fungal Zn(2)-Cys(6) binuclear cluster domain
PF172	fgenesh1_pg.19_#_164	37839	2293	0.791606	0.847452	1.01e-08	2.58e-08	1.58817e-08	6.28881e-08	Fungal Zn(2)-Cys(6) binuclear cluster domain
PF172	e_gw1.15.508.1	84143	2786	2.18166	0.861346	1.72e-14	5.84e-14	6.7819e-06	2.16712e-05	Fungal Zn(2)-Cys(6) binuclear cluster domain
PF172	estExt_Genewise1Plus.C_4_t20279	97001	2270	0.952208	0.879157	9.06e-06	1.92e-05	9.32976e-11	4.31688e-10	Fungal Zn(2)-Cys(6) binuclear cluster domain
PF172	gw1.11.705.1	63412	2032	0.943416	0.887525	0.475376	0.549313	0.143232	0.216722	Fungal Zn(2)-Cys(6) binuclear cluster domainFungal specific transcription factor domain
PF172	e_gw1.6.315.1	77049	2420	11.7607	0.903492	1.67e-20	7.02e-20	0.00450866	0.00996969	Fungal Zn(2)-Cys(6) binuclear cluster domainFungal specific transcription factor domain
PF172	fgenesh1_pm.5_#_113	128575	2535	1.21086	0.905141	1.76e-07	4.17e-07	1.27426e-06	4.321e-06	Fungal Zn(2)-Cys(6) binuclear cluster domain
PF172	estExt_Genewise1Plus.C_5_t10476	97398	1713	1.86806	0.921166	1.87e-12	5.8e-12	3.69724e-07	1.31039e-06	Fungal Zn(2)-Cys(6) binuclear cluster domain
PF172	e_gw1.39.76.1	92448	1670	1.33242	0.929322	2.76e-28	1.45e-27	2.5985e-27	2.17813e-26	Fungal Zn(2)-Cys(6) binuclear cluster domain
PF172	estExt_Genewise1Plus.C_15_t10412	101468	2263	1.07696	0.954676	0.0293506	0.0433647	0.00247506	0.00572033	Fungal Zn(2)-Cys(6) binuclear cluster domain
PF172	fgenesh1_pm.4_#_48	128051	2589	0.473931	0.967579	0.517138	0.574696	0.0241762	0.0459775	Fungal Zn(2)-Cys(6) binuclear cluster domain
PF172	estExt_Genewise1Plus.C_470007	105194	2409	0.256509	0.973976	0.00602986	0.00979651	9.28424e-40	1.01436e-38	Fungal Zn(2)-Cys(6) binuclear cluster domain
PF172	gm1.6591_g	11035	2149	1.80735	1	0.000636764	0.00114764	0.0141154	0.028243	Fungal Zn(2)-Cys(6) binuclear cluster domainFungal specific transcription factor domain
PF172	estExt_Genewise1Plus.C_8_t10169	98788	2950	-0.225363	1.01752	1.54e-39	1.02e-38	1.48925e-302	9.37518e-301	Fungal Zn(2)-Cys(6) binuclear cluster domainFungal specific transcription factor domain
PF172	estExt_Genewise1Plus.C_1_t10373	93861	2365	4.45167	1.05305	0	0	4.81668e-59	6.94292e-58	Fungal Zn(2)-Cys(6) binuclear cluster domain
PF172	e_gw1.14.406.1	83594	1407	9.86109	1.05565	0.000572744	0.00103759	0.0571804	0.0987584	Fungal Zn(2)-Cys(6) binuclear cluster domain
PF172	gm1.2076_g	6520	2613	1.54889	1.05848	0.00193497	0.00332438	7.39876e-08	2.7969e-07	Fungal Zn(2)-Cys(6) binuclear cluster domainFungal specific transcription factor domain
PF172	e_gw1.19.372.1	86800	1794	2.68012	1.10864	0.000353258	0.00065347	0.00148893	0.00355852	Fungal Zn(2)-Cys(6) binuclear cluster domain
PF172	e_gw1.5.643.1	76250	2351	1.98558	1.12928	7.56e-15	2.62e-14	1.59085e-07	5.85356e-07	Fungal Zn(2)-Cys(6) binuclear cluster domainFungal specific transcription factor domain
PF172	e_gw1.2.600.1	70536	1841	1.56131	1.13168	0.0175431	0.0267475	1.87131e-12	9.43712e-12	Fungal Zn(2)-Cys(6) binuclear cluster domain
PF172	estExt_fgenesh1_pg.C_50139	140778	2642	0.398744	1.13226	0.057592	0.0812204	1.74215e-11	8.41435e-11	Fungal Zn(2)-Cys(6) binuclear cluster domainFungal specific transcription factor domain
PF172	gw1.3.812.1	53472	916	1.04374	1.13369	3.63e-08	8.93e-08	4.65584e-14	2.56002e-13	Fungal Zn(2)-Cys(6) binuclear cluster domain
PF172	fgenesh1_pm.1_#_496	126082	2058	1.58496	1.14296	0.102013	0.137954	0.0622908	0.1061	Fungal Zn(2)-Cys(6) binuclear cluster domain
PF172	fgenesh1_pm.5_#_99	128561	2430	1.89308	1.17932	0.231552	0.290828	0.125119	0.194205	Fungal Zn(2)-Cys(6) binuclear cluster domainFungal specific transcription factor domain
PF172	gm1.2857_g	7301	2397	2.35295	1.19345	1.1e-06	2.47e-06	7.61394e-08	2.87707e-07	Fungal Zn(2)-Cys(6) binuclear cluster domainFungal specific transcription factor domain
PF172	e_gw1.15.214.1	83920	2232	3.68182	1.19555	4.95e-09	1.29e-08	0.125119	0.194139	Fungal Zn(2)-Cys(6) binuclear cluster domain
PF172	e_gw1.6.107.1	76418	2194	2.18955	1.25084	6.84e-08	1.66e-07	1.49889e-05	4.60362e-05	Fungal Zn(2)-Cys(6) binuclear cluster domain
PF172	e_gw1.4.341.1	74374	2483	3.96193	1.32487	5.41e-22	2.38e-21	4.74336e-20	3.30784e-19	Fungal Zn(2)-Cys(6) binuclear cluster domainFungal specific transcription factor domain
PF172	e_gw1.3.211.1	73370	1291	-1.99808	1.35548	2.24e-09	5.98e-09	0.0031469	0.00712712	Fungal Zn(2)-Cys(6) binuclear cluster domain
PF172	e_gw1.3.267.1	72675	1901	4.97881	1.36348	7.14e-17	2.64e-16	3.94616e-10	1.74309e-09	Fungal Zn(2)-Cys(6) binuclear cluster domainFungal specific transcription factor domain
PF172	e_gw1.5.911.1	75872	2300	1.76011	1.40808	1.01e-38	6.59e-38	1.37805e-78	2.50048e-77	Fungal Zn(2)-Cys(6) binuclear cluster domainFungal specific transcription factor domain
PF172	gw1.68.1.1	43491	1926	8.32193	1.4112	0.033845	0.0495473	0.0231768	0.0442771	Fungal Zn(2)-Cys(6) binuclear cluster domainFungal specific transcription factor domain
PF172	fgenesh1_pg.24_#_106	38522	1902	5.72012	1.49038	1.99e-29	1.07e-28	2.32262e-35	2.33118e-34	Fungal Zn(2)-Cys(6) binuclear cluster domainFungal specific transcription factor domain
PF172	estExt_fgenesh1_pm.C_40446	136533	2191	1.39396	1.49364	6.62e-60	5.83e-59	4.38274e-99	9.34513e-98	Fungal Zn(2)-Cys(6) binuclear cluster domain
PF172	e_gw1.35.83.1	91927	2650	1.7997	1.51457	0.00801716	0.0128421	0.0343864	0.0629126	Fungal Zn(2)-Cys(6) binuclear cluster domain
PF172	e_gw1.7.475.1	78229	1843	2.152	1.55199	0.000706658	0.00126784	1.489e-06	5.00698e-06	Fungal Zn(2)-Cys(6) binuclear cluster domain
PF172	e_gw1.30.297.1	90707	930	-0.122857	1.67907	0.721776	0.762953	1.46763e-18	9.69412e-18	Fungal Zn(2)-Cys(6) binuclear cluster domain
PF172	estExt_fgenesh1_pg.C_110229	141745	2107	0.679022	1.71982	6.62e-07	1.51e-06	3.32114e-134	9.5744e-133	Fungal Zn(2)-Cys(6) binuclear cluster domain
PF172	e_gw1.5.636.1	76208	2430	1.99537	1.73514	2.97e-07	6.94e-07	3.09558e-13	1.64257e-12	Fungal Zn(2)-Cys(6) binuclear cluster domainFungal specific transcription factor domain
PF172	estExt_Genewise1Plus.C_5_t10012	97256	2225	1.6364	1.79837	7.66e-19	3.02e-18	9.71026e-20	6.71088e-19	Fungal Zn(2)-Cys(6) binuclear cluster domain
PF172	fgenesh1_pg.52_#_11	39977	2284	1.98089	1.81885	0.000421316	0.000773402	1.51092e-08	5.99573e-08	Fungal Zn(2)-Cys(6) binuclear cluster domainFungal specific transcription factor domain
PF172	e_gw1.1.1551.1	67839	2414	2.40088	1.8679	1.22e-05	2.55e-05	3.41532e-05	0.00010104	Fungal Zn(2)-Cys(6) binuclear cluster domainFungal specific transcription factor domain
PF172	estExt_Genewise1Plus.C_10_t10436	99728	1662	3.21698	1.9311	8.73e-73	8.86e-72	7.54732e-90	1.48602e-88	Fungal Zn(2)-Cys(6) binuclear cluster domain
PF172	e_gw1.33.193.1	91554	1784	3.96523	1.99252	1.92e-11	5.69e-11	1.04222e-09	4.49845e-09	Fungal Zn(2)-Cys(6) binuclear cluster domain
PF172	estExt_Genewise1Plus.C_270127	103763	2742	3.87095	2.02671	1.07e-51	8.51e-51	4.9975e-24	3.88629e-23	Fungal Zn(2)-Cys(6) binuclear cluster domain
PF172	fgenesh1_pg.3_#_475	33597	2411	1.54749	2.20263	0.0100114	0.0158334	2.31952e-07	8.40769e-07	Fungal Zn(2)-Cys(6) binuclear cluster domainFungal specific transcription factor domain
PF172	e_gw1.34.47.1	91805	6457	1.45317	2.24101	0.047695	0.0680952	0.00039046	0.00101985	Fungal Zn(2)-Cys(6) binuclear cluster domain
PF172	gw1.3.777.1	52813	2196	9.27612	2.24286	0.000572744	0.00103779	0.00039046	0.00101927	Fungal Zn(2)-Cys(6) binuclear cluster domainFungal specific transcription factor domain
PF172	e_gw1.40.78.1	92577	1563	1.95606	2.24286	0.0244294	0.0365919	2.67716e-05	7.99691e-05	Fungal Zn(2)-Cys(6) binuclear cluster domain
PF172	gw1.4.115.1	42274	2057	0.560715	2.25678	0.487858	0.554943	8.1762e-08	3.08198e-07	Fungal Zn(2)-Cys(6) binuclear cluster domainFungal specific transcription factor domain
PF172	e_gw1.1.2147.1	69988	2344	4.90689	2.26206	1.2e-08	3.03e-08	3.22614e-13	1.70891e-12	Fungal Zn(2)-Cys(6) binuclear cluster domainFungal specific transcription factor domain
PF172	fgenesh1_pm.27_#_12	133808	1828	1.04182	2.31016	0.000252062	0.00047309	3.83528e-18	2.49239e-17	Fungal Zn(2)-Cys(6) binuclear cluster domain
PF172	e_gw1.31.223.1	91228	1740	10.3443	2.3152	1.91e-05	3.96e-05	1.36939e-07	5.06487e-07	Fungal Zn(2)-Cys(6) binuclear cluster domain
PF172	e_gw1.37.10.1	92206	2302	3.8646	2.34477	5.83e-17	2.16e-16	1.71992e-43	1.9747e-42	Fungal Zn(2)-Cys(6) binuclear cluster domain
PF172	e_gw1.4.971.1	73946	1861	3.14296	2.37022	0.00027801	0.000519545	0.000132849	0.000368853	Fungal Zn(2)-Cys(6) binuclear cluster domainFungal specific transcription factor domain
PF172	estExt_Genemark1.C_260059	26508	2247	0	2.41504	0.979924	0.986852	0.11419	0.180265	Fungal Zn(2)-Cys(6) binuclear cluster domainFungal specific transcription factor domain
PF172	e_gw1.47.20.1	93160	2302	11.7607	2.51616	5.01e-19	1.99e-18	1.19411e-19	8.23421e-19	Fungal Zn(2)-Cys(6) binuclear cluster domainFungal specific transcription factor domain
PF172	e_gw1.6.1154.1	77001	2524	2.99208	2.51734	1.29e-36	8.07e-36	2.52602e-92	5.03789e-91	Fungal Zn(2)-Cys(6) binuclear cluster domain
PF172	e_gw1.5.515.1	75915	1317	8.81378	3.79701	0.033845	0.0494996	0.000406898	0.00105771	Fungal Zn(2)-Cys(6) binuclear cluster domain
PF172	e_gw1.52.34.1	93412	2145	7.90689	6.29205	0.066796	0.0926948	1.64898e-86	3.17909e-85	Fungal Zn(2)-Cys(6) binuclear cluster domainFungal specific transcription factor domain
PF172	fgenesh1_pg.3_#_229	33351	1770	-	8.12928	-	-	0.116693	0.18303	Fungal Zn(2)-Cys(6) binuclear cluster domain
PF172	e_gw1.5.659.1	76173	1768	-1.58496	8.40939	0.166862	0.215272	0.057352	0.0987047	Fungal Zn(2)-Cys(6) binuclear cluster domain
PF172	gw1.17.54.1	42341	1591	-	9.25267	-	-	0.0138534	0.0277607	Fungal Zn(2)-Cys(6) binuclear cluster domain
PF172	gm1.8831_g	13275	445	-	-	-	-	-	-	Fungal Zn(2)-Cys(6) binuclear cluster domain
PF172	e_gw1.17.220.1	85220	1342	-	-	-	-	-	-	Fungal Zn(2)-Cys(6) binuclear cluster domain
PF172	e_gw1.26.87.1	89568	1547	-	-	-	-	-	-	Fungal Zn(2)-Cys(6) binuclear cluster domain
PF172	e_gw1.3.549.1	73059	2039	6.12928	-	0.513474	0.576812	-	-	Fungal Zn(2)-Cys(6) binuclear cluster domain
PF2045	e_gw1.53.10.1	93466	1038	0.567378	0.0720015	0.00593308	0.00964615	0.687006	0.758748	CCAAT-binding transcription factor (CBF-B/NF-YA) subunit B
PF2178	estExt_fgenesh1_pm.C_1_t10354	135379	6216	-0.150483	-0.693602	0.00785608	0.0125929	8.87914e-52	1.17382e-50	DEAD/DEAH box helicaseHelicase conserved C-terminal domainAT hook motif
PF2178	gm1.636_g	5080	572	0.505683	-0.435006	0.382548	0.453486	0.475848	0.584096	AT hook motif
PF2178	e_gw1.8.267.1	79465	4883	-0.573814	-0.301358	1.56e-12	4.86e-12	3.23092e-05	9.57992e-05	AT hook motifJmjC domain, hydroxylasejmjN domain
PF2178	fgenesh1_pg.1_#_593	32104	1952	1.33265	-0.176984	7.08e-08	1.71e-07	0.452422	0.561297	AT hook motif
PF2178	e_gw1.12.542.1	82181	1992	0.230884	-0.137504	0.463952	0.537748	0.57652	0.665974	AT hook motif
PF2178	fgenesh1_pg.9_#_52	35531	2912	0.455108	-0.0498666	1.96e-05	4.06e-05	0.654724	0.73077	AT hook motif
PF2178	estExt_Genewise1.C_1_t50366	106432	4030	0.692128	-0.0194365	2.76e-07	6.46e-07	0.883064	0.921605	AT hook motif
PF2178	fgenesh1_pg.1_#_243	31754	6031	1.45568	0.02284	8.4e-18	3.21e-17	0.856238	0.898472	AT hook motif
PF2178	gw1.9.852.1	66072	3699	1.01753	0.0768831	7.67e-12	2.31e-11	0.54024	0.630598	AT hook motifJmjC domain, hydroxylase
PF2178	gw1.14.366.1	54688	2850	1.97938	0.403124	6.02e-21	2.55e-20	0.00988072	0.0204099	Inhibitor of Apoptosis domainAT hook motif
PF2178	fgenesh1_pg.1_#_9	31520	794	0.30443	0.450305	0.0988918	0.134052	0.0124557	0.025178	AT hook motif
PF2178	e_gw1.22.208.1	87783	2339	1.93901	0.524142	1.36e-11	4.04e-11	0.00838638	0.0175662	AT hook motif
PF2178	e_gw1.2.1707.1	70851	5745	1.40746	0.584963	1.21e-28	6.43e-28	5.78012e-11	2.70832e-10	AT hook motifHEAT repeat
PF2178	e_gw1.1.1218.1	69792	2595	2.45943	0.665674	2.13e-11	6.29e-11	0.00219418	0.00510431	AT hook motif
PF2178	e_gw1.21.270.1	87423	1966	1.2999	0.706269	0.000276534	0.000517104	0.0169485	0.0333918	AT hook motif
PF2178	gm1.4621_g	9065	1984	1.68922	0.95948	3.61e-13	1.16e-12	6.32294e-11	2.95219e-10	AT hook motif
PF249	e_gw1.28.365.1	90417	327	-1.01668	-12.2992	0.60506	0.658358	0.000598072	0.00151632	Myb-like DNA-binding domain
PF249	e_gw1.44.53.1	92923	2010	-0.0483876	-0.972469	0.789206	0.825141	2.30974e-26	1.90163e-25	Myb-like DNA-binding domain
PF249	estExt_Genewise1Plus.C_1_t20103	93981	1817	1.25424	-0.494307	4.01e-05	8.07e-05	0.0242958	0.046167	Myb-like DNA-binding domain
PF249	estExt_Genewise1.C_2_t20192	106999	2466	0.896413	-0.122368	7.45e-17	2.75e-16	0.103473	0.165407	Myb-like DNA-binding domain
PF249	e_gw1.8.525.1	79237	3839	0.792007	0.00700339	0.000705076	0.0012655	0.966084	0.981462	Myb-like DNA-binding domain
PF249	gw1.29.244.1	63061	1467	1.88209	0.0218213	3.27e-11	9.55e-11	0.9211	0.950581	Myb-like DNA-binding domain
PF249	e_gw1.1.2126.1	68158	7166	0.893265	0.0575101	1e-20	4.22e-20	0.451934	0.560842	Myb-like DNA-binding domainDASH complex subunit Dad1
PF249	estExt_Genewise1Plus.C_2_t10009	95080	2425	0.647155	0.168006	9.1e-20	3.72e-19	0.00362362	0.0081233	Myb-like DNA-binding domainZinc finger, ZZ typeSWIRM domain
PF249	estExt_fgenesh1_pm.C_250044	138889	9698	0.344558	0.254421	0.00146741	0.00255821	0.0206816	0.0399556	Myb-like DNA-binding domain
PF249	e_gw1.4.345.1	74667	6256	0.0679168	0.342791	0.451784	0.524912	3.6552e-06	1.19271e-05	Myb-like DNA-binding domainPHD-fingerBAH domain
PF249	estExt_fgenesh2_kg.C_40016	122485	2258	-0.938237	0.505507	8.23e-144	1.34e-142	1.21898e-42	1.38241e-41	Myb-like DNA-binding domain
PF249	estExt_Genewise1Plus.C_230145	103219	1976	0.735897	0.672835	4.37e-06	9.47e-06	5.24938e-07	1.84216e-06	Myb-like DNA-binding domainZinc finger, ZZ typeSWIRM domain
PF249	fgenesh1_pm.1_#_513	126099	1114	-1.4769	1.92859	0.0158874	0.0243984	0.00170928	0.00404544	Myb-like DNA-binding domain
PF249	e_gw1.10.324.1	80751	567	-	-	-	-	-	-	Myb-like DNA-binding domain
PF250	e_gw1.21.333.1	87449	3618	1.84643	-0.333357	6.98e-34	4.18e-33	0.00266964	0.0061348	Forkhead domainAT hook motif
PF250	e_gw1.1.1183.1	67752	2316	0.0450198	-0.155967	0.68066	0.726654	0.0572898	0.0989104	Forkhead domain
PF250	e_gw1.41.115.1	92670	2134	1.30764	0.113891	1.86e-09	4.98e-09	0.518764	0.609838	Forkhead domainFHA domain
PF250	e_gw1.1.2133.1	68757	2451	1.35364	0.63743	0.159374	0.206548	0.413918	0.523135	Forkhead domain
PF319	e_gw1.22.92.1	88074	2021	-0.0814188	-0.719979	0.603802	0.659746	1.46966e-07	5.42275e-07	SRF-type transcription factor (DNA-binding and dimerisation domain)
PF319	estExt_Genewise1.C_12_t10417	112144	1599	0.617331	0.709436	2.64e-09	7.02e-09	2.56564e-20	1.80277e-19	SRF-type transcription factor (DNA-binding and dimerisation domain)
PF320	e_gw1.12.562.1	82207	1659	-0.0247197	-0.38802	0.728326	0.769164	1.91872e-09	8.12996e-09	GATA zinc fingerPAS fold
PF320	estExt_Genewise1Plus.C_9_t10395	99336	1989	-2.29925	-0.381889	0	0	7.58148e-45	8.91474e-44	GATA zinc finger
PF320	fgenesh1_pm.11_#_7	130674	4124	1.59048	-0.257496	2.55e-22	1.14e-21	0.026339	0.0496418	GATA zinc finger
PF320	e_gw1.1.1324.1	68909	3194	0.288771	-0.0306142	0.000725234	0.0013004	0.67137	0.744679	GATA zinc fingerPAS foldPAS fold
PF320	estExt_Genewise1.C_2_t20412	107102	2370	1.41795	0.0685212	3.44e-20	1.43e-19	0.408516	0.51751	GATA zinc finger
PF320	e_gw1.1.2974.1	69443	1868	0.609312	0.185204	0.000131077	0.00025161	0.165995	0.246094	GATA zinc fingerSNF5 / SMARCB1 / INI1
PF320	estExt_Genewise1.C_8_t10261	110465	2269	0.386304	0.341096	2.73e-09	7.24e-09	1.38222e-10	6.31035e-10	GATA zinc finger
PF320	estExt_fgenesh1_pg.C_50219	140814	3555	0.370316	0.399636	3.18e-09	8.36e-09	4.66946e-15	2.68726e-14	GATA zinc finger
PF352	fgenesh1_pg.13_#_201	36701	947	-0.373806	-0.611601	8.88e-09	2.27e-08	5.87362e-18	3.76938e-17	Transcription factor TFIID (or TATA-binding protein, TBP)
PF4082	e_gw1.6.678.1	77229	1825	-0.79518	-1.32511	0.162465	0.210225	1.52705e-10	6.95437e-10	Fungal specific transcription factor domain
PF4082	estExt_fgenesh1_pm.C_60023	136703	2375	1.91648	-0.886044	0.00182948	0.00315623	0.0985368	0.158557	Fungal specific transcription factor domain
PF4082	estExt_Genewise1.C_1_t60138	106512	667	0.615272	-0.482454	0.00416088	0.00689522	0.0238572	0.0454924	Fungal specific transcription factor domain
PF4082	gm1.2739_g	7183	1545	2.80296	-0.296617	5.39e-08	1.32e-07	0.473034	0.582109	Fungal specific transcription factor domain
PF4082	e_gw1.5.274.1	75497	2353	1.94035	-0.0650041	4.79e-14	1.6e-13	0.680372	0.753039	Fungal specific transcription factor domain
PF4082	fgenesh1_pg.23_#_35	38339	2451	-0.448461	-0.0352324	0.016363	0.0251035	0.839768	0.883695	Fungal specific transcription factor domain
PF4082	e_gw1.1.2417.1	67874	3031	1.11708	-0.0136749	1.85e-18	7.21e-18	0.906274	0.939892	Fungal specific transcription factor domain
PF4082	e_gw1.6.441.1	77202	1788	2.5008	0.191696	5.79e-07	1.33e-06	0.39986	0.509053	Fungal specific transcription factor domain
PF4082	estExt_Genemark1.C_100124	25145	2116	2.23591	0.255775	2.96e-40	1.98e-39	0.0160117	0.0316742	Fungal specific transcription factor domain
PF4082	estExt_Genewise1.C_250278	115156	1713	1.32503	0.291156	5.41e-09	1.4e-08	0.0820046	0.134671	Fungal specific transcription factor domain
PF4082	fgenesh1_pm.17_#_205	132337	2479	1.32906	0.306415	7.08e-08	1.72e-07	0.0764986	0.126663	Fungal specific transcription factor domain
PF4082	e_gw1.21.352.1	87725	3116	1.07013	0.440101	5.61e-12	1.71e-11	0.000310292	0.000823471	Fungal specific transcription factor domain
PF4082	gw1.48.4.1	40931	531	2.68605	0.448826	3.58e-06	7.81e-06	0.134939	0.205924	Fungal specific transcription factor domain
PF4082	fgenesh1_pm.27_#_39	133835	8563	1.12988	0.509788	8.73e-06	1.85e-05	0.000246086	0.000661423	Permease for cytosine/purines, uracil, thiamine, allantoinFungal specific transcription factor domain
PF4082	e_gw1.34.34.1	91730	2290	-1.19927	0.624161	3.65e-139	5.82e-138	1.6766e-40	1.84706e-39	Fungal specific transcription factor domain
PF4082	estExt_Genewise1Plus.C_6_t30107	98096	2063	1.26858	0.624917	2.37e-42	1.64e-41	2.15354e-18	1.41139e-17	Fungal specific transcription factor domain
PF4082	e_gw1.6.291.1	76601	1404	1.65208	0.643208	0.0355304	0.0517487	0.285604	0.386683	Fungal specific transcription factor domain
PF4082	e_gw1.6.1036.1	77495	1896	1.38746	0.670745	6.6e-13	2.09e-12	9.50016e-06	2.98927e-05	Fungal specific transcription factor domain
PF4082	e_gw1.14.110.1	83691	2477	-0.571138	0.698244	3e-13	9.67e-13	8.44362e-57	1.18211e-55	Fungal specific transcription factor domain
PF4082	estExt_Genemark1.C_40033	24135	4363	3.04399	0.817522	5.69e-84	6.41e-83	8.24214e-20	5.70904e-19	Zinc-binding dehydrogenaseFungal specific transcription factor domainAlcohol dehydrogenase GroES-like domain
PF4082	gw1.9.149.1	44231	1604	2.58496	1.48448	8e-05	0.000156739	0.000926316	0.00228407	Fungal specific transcription factor domain
PF4082	gw1.3.1053.1	57466	2396	3.23068	1.59215	4.96e-08	1.21e-07	5.5102e-09	2.26528e-08	Fungal specific transcription factor domain
PF4082	fgenesh1_pg.1_#_123	31634	1696	7.79337	1.62127	0	0	0	0	Fungal specific transcription factor domain
PF4082	e_gw1.1.1046.1	69430	1844	7.22882	4.08746	0.260174	0.319815	2.15002e-08	8.42706e-08	Fungal specific transcription factor domain
PF447	estExt_Genewise1Plus.C_8_t10373	98900	2452	-1.35818	-2.43672	7.32e-161	1.32e-159	0	0	HSF-type DNA-binding
PF447	e_gw1.21.215.1	87490	2104	1.32067	-0.314673	1.58e-31	8.91e-31	6.67308e-05	0.000190948	HSF-type DNA-binding
PF447	estExt_Genewise1.C_7_t20411	110128	2273	0.214333	0.315321	0.0400316	0.05787	0.000134863	0.00037422	Response regulator receiver domainHSF-type DNA-binding
PF46	estExt_Genewise1Plus.C_4_t30165	97200	1785	-2.86307	-0.710997	0	0	1.93756e-12	9.76588e-12	Homeodomain
PF46	estExt_Genewise1Plus.C_15_t10419	101472	3354	1.16812	0.351541	4.53e-06	9.81e-06	0.0365108	0.0661843	Homeodomain
PF46	e_gw1.16.259.1	85067	1607	1.31715	0.775797	1.47e-08	3.72e-08	1.14364e-05	3.561e-05	Homeodomain
PF46	e_gw1.3.962.1	73414	1992	0.124158	1.03085	0.556386	0.612636	1.70556e-10	7.72932e-10	Homeodomain
PF46	fgenesh1_pm.6_#_251	129117	2009	-0.339372	1.2416	4.46e-14	1.49e-13	0	0	Homeodomain
PF505	estExt_Genemark1.C_50359	24440	835	-2.44722	-0.808574	2.88e-10	8.05e-10	0.0176483	0.0346598	HMG (high mobility group) box
PF505	fgenesh1_pm.12_#_13	130971	1551	-1.727	-0.389421	5.29e-207	1.11e-205	3.07922e-07	1.09935e-06	HMG (high mobility group) box
PF505	estExt_fgenesh1_pg.C_110202	141729	1158	0.608218	-0.356579	6.69e-18	2.56e-17	1.39569e-09	5.9712e-09	HMG (high mobility group) box
PF505	estExt_Genewise1Plus.C_4_t30017	97132	6691	0.583685	-0.318817	5.03e-17	1.87e-16	1.22907e-07	4.56596e-07	HMG (high mobility group) boxSec1 familyFlavin containing amine oxidoreductaseSWIRM domain
PF505	fgenesh1_pm.4_#_405	128408	1906	-1.03523	-0.271194	5.12e-06	1.1e-05	0.00784306	0.0165066	HMG (high mobility group) boxSAM domain (Sterile alpha motif)
PF505	fgenesh2_kg.2_#_378_#_gi|38352795|gb|CF932974.1|CF932974	117827	580	-0.827932	0.110154	4.25e-110	5.84e-109	0.00179626	0.00423614	HMG (high mobility group) box
PF505	gw1.9.56.1	41506	219	-0.0198996	1.65208	0.974908	0.98594	0.354056	0.462512	HMG (high mobility group) box
PF505	gw1.1.2496.1	62441	258	-	9.3443	-	-	0.4831	0.58424	HMG (high mobility group) box
pf649	e_gw1.7.154.1	78476	1529	-0.313979	-0.42618	0.000571102	0.00103543	9.408e-08	3.53335e-07	Copper fist DNA binding domain
pf649	estExt_Genewise1.C_13_t20114	112571	1601	0.900189	-0.00341952	3.72e-08	9.17e-08	0.976856	0.981949	Copper fist DNA binding domain
PF808	estExt_Genemark1.C_40405	24298	1248	0.848478	-0.210052	4.96e-10	1.37e-09	0.139467	0.211821	Histone-like transcription factor (CBF/NF-Y) and archaeal histone
PF808	estExt_fgenesh2_kg.C_420003	125434	1750	0.768279	-0.198251	4.04e-25	1.94e-24	0.0012354	0.00298887	Histone-like transcription factor (CBF/NF-Y) and archaeal histone
PF808	fgenesh1_pm.14_#_189	131629	1086	-0.221595	-0.101548	0.231828	0.290654	0.557484	0.647703	Histone-like transcription factor (CBF/NF-Y) and archaeal histone
PF808	e_gw1.15.414.1	83972	831	0.193028	0.152599	0.107002	0.144081	0.155623	0.233221	Histone-like transcription factor (CBF/NF-Y) and archaeal histone
PF808	fgenesh1_pg.11_#_221	36251	1414	2.05209	0.229868	7.81e-07	1.77e-06	0.437068	0.545613	Histone-like transcription factor (CBF/NF-Y) and archaeal histone
PF808	e_gw1.8.871.1	78949	957	1.06745	0.563933	0.00433912	0.00717754	0.0277008	0.0518494	Histone-like transcription factor (CBF/NF-Y) and archaeal histone
PF989	fgenesh1_pm.16_#_8	131906	2193	0.218996	-0.224725	0.0641876	0.0896757	0.0637342	0.108041	Response regulator receiver domainHis Kinase A (phospho-acceptor) domainPAS foldHistidine kinase-, DNA gyrase B-, and HSP90-like ATPase
PF989	e_gw1.13.627.1	83057	4136	1.34415	0.094615	1.3e-24	6.13e-24	0.220074	0.313559	Response regulator receiver domainHis Kinase A (phospho-acceptor) domainPAS foldHistidine kinase-, DNA gyrase B-, and HSP90-like ATPase
