# Supplementary material for: Global Reprogramming of Gene Transcription in Trichoderma reesei by Overexpressing an Artificial Transcription Factor for Improved Cellulase Production and Identification of Ypr1 as an Associated Regulator
Source: Front Bioeng Biotechnol. 2020 Jul 3;8:649. doi: 10.3389/fbioe.2020.00649 (PMC7351519; doi:10.3389/fbioe.2020.00649)
Supplement: Supplementary file 5 [file Table_5.XLSX]

## Sheet: CAZymes
DEGs of CAZymes between T. reesei U5 and Rut-C30
Family	Class	Gene ID	Model ID	GeneLength	C30_24h-FPKM	U5_24h-FPKM	log2 24 h Ratio(U5/C30)	C30_48h-FPKM	U5_48h-FPKM	log2 Ratio 48 h(U5/C30)	Annotation
1	Carbohydrate esterase	130436	fgenesh1_pm.10_#_62	861	11.04	25.1	1.18495	38.67	46.6	0.269115	Candidate S-formylglutathione hydrolase
1	Carbohydrate esterase	63275	gw1.19.510.1	762	0.001	0.16	7.32193	0.34	0.18	-0.917538	Candidate esterase
1	Carbohydrate esterase	32332	fgenesh1_pg.1_#_821	696	17.2	22.35	0.377866	21.65	59.22	1.45172	Candidate esterase
3	Carbohydrate esterase	142761	estExt_fgenesh1_pg.C_240100	1979	0.36	0.06	-2.58496	0.44	1.88	2.09516	Candidate esterase
3	Carbohydrate esterase	134377	fgenesh1_pm.32_#_6	2724	3.27	0.59	-2.4705	0.4	0.47	0.232661	Candidate acetyl xylan esterase
3	Carbohydrate esterase	128705	fgenesh1_pm.5_#_243	804	1.88	6.41	1.76959	2.43	6.38	1.3926	Candidate acetyl xylan esterase
3	Carbohydrate esterase	35989	fgenesh1_pg.10_#_218	459	-	-	-	0.3	0.32	0.0931094	Candidate esterase
3	Carbohydrate esterase	134869	fgenesh1_pm.41_#_23	2442	24.67	23.58	-0.065194	35.52	31.35	-0.180166	Candidate esterase/suberinase
4	Carbohydrate esterase	79572	e_gw1.9.88.1	894	-	-	-	-	-	-	Candidate chitin deacetylase
4	Carbohydrate esterase	63926	gw1.30.320.1	1089	-	-	-	-	-	-	Candidate chitin deacetylase
4	Carbohydrate esterase	127278	fgenesh1_pm.2_#_603	2055	6.64	21.12	1.66935	11.96	21.22	0.827207	Candidate polysaccharide deacetylase
5	Carbohydrate esterase	76732	e_gw1.6.693.1	747	0.34	0.33	-0.0430687	0.18	0.18	0	Candidate cutinase
5	Carbohydrate esterase	94461	estExt_Genewise1Plus.C_1_t40096	1079	26.36	20.71	-0.348023	55.37	36.07	-0.618305	Candidate acetyl xylan esterase
5	Carbohydrate esterase	88887	e_gw1.24.392.1	642	40.41	4.1	-3.30102	0.42	2.8	2.73697	Candidate acetyl xylan esterase
5	Carbohydrate esterase	139631	estExt_fgenesh1_pg.C_1_t10122	962	1975.98	3045.85	0.624277	137.35	151.24	0.138983	Acetyl xylan esterase
9	Carbohydrate esterase	112537	estExt_Genewise1.C_13_t20053	1784	20.35	36.74	0.852323	441	115.41	-1.93401	Candidate N-acetyl-glucosamine-6-phosphate deacetylase
14	Carbohydrate esterase	24178	estExt_Genemark1.C_40165	1136	145.64	57.99	-1.32853	94.44	103.47	0.131743	Candidate N-acetylglucosaminylphosphatidylinositol de-N-acetylase
14	Carbohydrate esterase	74933	e_gw1.4.669.1	903	18.76	30.31	0.692134	8.86	13.17	0.571877	Candidate N-acetylglucosaminylphosphatidylinositol de-N-acetylase
15	Carbohydrate esterase	125575	estExt_fgenesh2_kg.C_540002	1383	212.22	650.25	1.61543	2.27	26.79	3.56093	Glucuronoyl esterase
16	Carbohydrate esterase	5643	gm1.1199_g	1029	0.96	1.87	0.961932	1.24	4.89	1.97949	Candidate acetyl esterase
16	Carbohydrate esterase	136770	estExt_fgenesh1_pm.C_60197	1123	281.61	510.16	0.857251	44.58	86.35	0.9538	Acetyl esterase
1	Glycoside hydrolase	77989	e_gw1.7.911.1	1455	215.82	379.73	0.815145	220.29	498.75	1.17891	Candidate β-glucosidase
1	Glycoside hydrolase	127115	fgenesh1_pm.2_#_440	1401	3580.65	2983.21	-0.263356	2302.34	3341.09	0.537218	β-glucosidase
2	Glycoside hydrolase	12549	gm1.8105_g	2829	3.02	4.95	0.71288	2.6	5.02	0.949176	Candidate β-mannosidase
2	Glycoside hydrolase	34103	fgenesh1_pg.5_#_42	2775	2.87	3	0.0639118	5.52	4.84	-0.189661	Candidate β-mannosidase
2	Glycoside hydrolase	93487	e_gw1.54.13.1	2793	0.3	0.12	-1.32193	0.61	1.54	1.33605	Candidate β-mannosidase
2	Glycoside hydrolase	67432	e_gw1.1.629.1	2565	215.54	184.58	-0.223709	121.88	213.6	0.80945	Candidate β-mannosidase
2	Glycoside hydrolase	127187	fgenesh1_pm.2_#_512	2754	17.89	17.44	-0.0367533	18.23	42.85	1.23298	Candidate β-mannosidase
2	Glycoside hydrolase	24455	estExt_Genemark1.C_60033	2709	0.22	0.3	0.447459	0.63	2.15	1.77091	Exo-β-D-glucosaminidase
2	Glycoside hydrolase	97525	estExt_Genewise1Plus.C_5_t20289	1942	4.81	1.69	-1.50901	4.08	4.62	0.179324	Candidate β-galactosidase/β-glucuronidase
2	Glycoside hydrolase	69375	e_gw1.1.2545.1	1254	4.87	0.85	-2.51839	1.21	0.31	-1.96467	Candidate GH2 protein
3	Glycoside hydrolase	25095	estExt_Genemark1.C_100013	2708	26.97	17.61	-0.614961	40.59	20.84	-0.961769	Candidate β-glucosidase
3	Glycoside hydrolase	109567	estExt_Genewise1.C_6_t20284	2654	2.95	5.15	0.803857	4.67	5.59	0.259426	Candidate β-glucosidase
3	Glycoside hydrolase	86704	e_gw1.19.11.1	2673	3.15	11.57	1.87697	7.15	8.12	0.183536	Candidate β-glucosidase
3	Glycoside hydrolase	74305	e_gw1.4.1135.1	2298	22.16	13.81	-0.682245	14.14	64.09	2.18032	Candidate β-glucosidase
3	Glycoside hydrolase	136547	estExt_fgenesh1_pm.C_50031	2235	35.88	48.27	0.427947	1.49	6.85	2.20079	β-glucosidase
3	Glycoside hydrolase	8750	gm1.4306_g	2346	14.02	23.93	0.771334	4.46	18.51	2.05319	Candidate β-glucosidase
3	Glycoside hydrolase	122639	estExt_fgenesh2_kg.C_50002	2265	36.76	55.77	0.601353	17.29	22.12	0.355414	Candidate β-glucosidase
3	Glycoside hydrolase	125268	estExt_fgenesh2_kg.C_340019	2796	128.71	110.6	-0.218773	63.14	159.53	1.3372	Candidate β-glucosidase
3	Glycoside hydrolase	82126	e_gw1.12.314.1	2850	0.54	0.28	-0.947533	0.04	0.62	3.9542	Candidate β-glucosidase/glucan 1,4-β-glucosidase
3	Glycoside hydrolase	12475	gm1.8031_g	1602	3.01	10.29	1.77341	5.29	9.75	0.882134	Candidate β-N-acetylglucosaminidase
3	Glycoside hydrolase	25564	estExt_Genemark1.C_130191	3299	10.97	30.89	1.49358	52.83	45.31	-0.221528	Candidate β-N-acetylglucosaminidase
3	Glycoside hydrolase	74129	e_gw1.4.614.1	2583	0.09	0.27	1.58496	0.05	0.54	3.43296	Candidate β-xylosidase
3	Glycoside hydrolase	140746	estExt_fgenesh1_pg.C_50028	2432	1348.86	989.17	-0.44745	218.27	308.09	0.497238	β-xylosidase
5	Glycoside hydrolase	131384	fgenesh1_pm.13_#_191	1311	8.92	11.24	0.333526	13.16	6.36	-1.04906	Candidate glucan β-1,3-glucosidase
5	Glycoside hydrolase	110087	estExt_Genewise1.C_7_t20322	2516	8.75	22.45	1.35936	19.42	24.75	0.349885	Candidate β-glycosidase
5	Glycoside hydrolase	27047	estExt_Genemark1.C_490011	1777	55.21	85.52	0.631332	171.06	262.66	0.618694	Candidate membrane bound endoglucanase
5	Glycoside hydrolase	72489	e_gw1.3.1006.1	1257	4337.95	10972.7	1.33883	227.41	895.22	1.97695	Endo-β-1,4-glucanase
5	Glycoside hydrolase	122377	estExt_fgenesh2_kg.C_30102	1419	1395.9	2781.76	0.994802	68.23	1723.87	4.6591	β-Mannanase
5	Glycoside hydrolase	68509	e_gw1.1.1209.1	1230	4.67	69.5	3.89552	84.45	83.08	-0.0235962	Candidate endo-β-1,4-glucanase
5	Glycoside hydrolase	32448	fgenesh1_pg.1_#_937	1167	0.21	0.1	-1.07039	2.5	12.71	2.34596	Candidate β-1,3-mannanase/endo-β-1,4-mannosidase
6	Glycoside hydrolase	122470	estExt_fgenesh2_kg.C_30202	1720	9675.8	22309.8	1.20522	523.49	2552.57	2.28572	Cellobiohydrolase
7	Glycoside hydrolase	5304	gm1.860_g	1380	1470.67	5314.29	1.8534	58.6	823.86	3.81343	Endo-β-1,4-glucanase
7	Glycoside hydrolase	125125	estExt_fgenesh2_kg.C_300009	1888	20236.8	48808.5	1.27015	1052.44	4674.95	2.15121	Cellobiohydrolase
10	Glycoside hydrolase	23616	estExt_Genemark1.C_2_t10124	1302	159.83	10.23	-3.96566	0.001	2.8	11.4512	Endo-β-1,4-xylanase
11	Glycoside hydrolase	38418	fgenesh1_pg.24_#_2	690	381.53	3024.8	2.98697	169.85	792.73	2.22257	Endo-β-1,4-xylanase
11	Glycoside hydrolase	134945	fgenesh1_pm.43_#_21	594	29.88	260.05	3.12154	19.26	155.92	3.01713	Candidate endo-β-1,4-xylanase
11	Glycoside hydrolase	124931	estExt_fgenesh2_kg.C_260030	771	8019.95	2562.81	-1.64587	13.91	221.12	3.99064	Endo-β-1,4-xylanase
12	Glycoside hydrolase	124438	estExt_fgenesh2_kg.C_190032	624	240.72	131.54	-0.871854	0.21	89.98	8.74307	Endo-β-1,4-glucanase
12	Glycoside hydrolase	97721	estExt_Genewise1Plus.C_6_t10170	987	62.97	57.92	-0.120603	477.75	324.25	-0.559149	Candidate endo-β-1,4-glucanase
13	Glycoside hydrolase	75171	e_gw1.5.1103.1	1797	0.2	0.72	1.848	0.001	1.07	10.0634	Candidate α-glucosidase
13	Glycoside hydrolase	130860	fgenesh1_pm.11_#_193	1722	9.65	9.61	-0.00599251	21.59	33.71	0.642813	Candidate α-glucosidase/oligo α-glucosidase
13	Glycoside hydrolase	75754	e_gw1.5.116.1	1392	2.36	5.19	1.13695	7.85	10.18	0.374973	Candidate α-amylase
13	Glycoside hydrolase	73564	e_gw1.3.837.1	4674	18.94	29.15	0.62206	46.14	40.59	-0.184894	Candidate glycogen debranching enzyme
13	Glycoside hydrolase	114146	estExt_Genewise1.C_200016	2201	103.55	134.41	0.376313	139.59	150.64	0.109909	Candidate 1,4-α-glucan branching enzyme
15	Glycoside hydrolase	70185	e_gw1.1.1391.1	1899	51.6	34.99	-0.560428	99.01	61.58	-0.685112	Glucoamylase
15	Glycoside hydrolase	83535	e_gw1.14.248.1	2034	2.88	60.59	4.39494	57.04	43.26	-0.39894	Candidate alpha-glycosidase (Glucoamylase and related glycosyl hydrolases)
16	Glycoside hydrolase	136875	estExt_fgenesh1_pm.C_60443	1551	232.92	373.16	0.67996	822.47	572.51	-0.522662	Candidate glucan endo-1,3(4)-β-D-glucosidase
16	Glycoside hydrolase	136460	estExt_fgenesh1_pm.C_40312	1181	0.21	2.33	3.47187	1.39	1	-0.475085	Candidate glucan endo-1,3(4)-β-D-glucosidase
16	Glycoside hydrolase	111701	estExt_Genewise1.C_11_t10350	1151	73.41	124.05	0.756873	159.6	516	1.69291	Candidate glucan endo-1,3(4)-β-D-glucosidase
16	Glycoside hydrolase	95463	estExt_Genewise1Plus.C_2_t20346	2220	-	-	-	0.001	0.4	8.64386	Candidate glucan endo-1,3(4)-β-D-glucosidase
16	Glycoside hydrolase	34980	fgenesh1_pg.7_#_148	1305	-	-	-	0.1	0.001	-6.64386	Candidate cell wall glucanosyltransferase
16	Glycoside hydrolase	140706	estExt_fgenesh1_pg.C_40327	1533	36.52	36.24	-0.0111038	90.31	37.89	-1.25307	Candidate cell wall glucanosyltransferase
16	Glycoside hydrolase	41632	gw1.19.27.1	1017	16.89	25.62	0.601101	45.4	79.97	0.816767	Candidate cell wall glucanosyltransferase
16	Glycoside hydrolase	66752	gw1.14.616.1	825	3014.19	614.5	-2.29429	1415.5	646.44	-1.13072	Candidate cell wall glucanosyltransferase
16	Glycoside hydrolase	142027	estExt_fgenesh1_pg.C_140111	1914	65.72	51.02	-0.36527	316.87	801.24	1.33834	Candidate endo-1,3-β-D-glucosidase/1,3-glucan binding protein
16	Glycoside hydrolase	96805	estExt_Genewise1Plus.C_4_t10272	1759	163.34	160.05	-0.0293555	368.14	439.45	0.255445	Candidate cell wall glucanosyltransferase
16	Glycoside hydrolase	100583	estExt_Genewise1Plus.C_12_t20038	1265	27.3	17.6	-0.633326	57.45	193.52	1.7521	Candidate glucan endo-1,3(4)-β-D-glucosidase
16	Glycoside hydrolase	103726	estExt_Genewise1Plus.C_270063	991	0.001	0.12	6.90689	-	-	-	Candidate glucan endo-1,3(4)-β-D-glucosidase
16	Glycoside hydrolase	80532	e_gw1.10.307.1	1248	7.83	24.73	1.65918	39.86	18.44	-1.1121	Candidate glucan endo-1,3(4)-β-D-glucosidase
16	Glycoside hydrolase	56838	gw1.41.46.1	1143	5.47	7.65	0.483919	7	1.49	-2.23204	Candidate b-glycosidase (endo-beta-1,3(4)-β-D-glucanase)
16	Glycoside hydrolase	70043	e_gw1.1.1965.1	933	9.06	22.5	1.31234	30.21	36.43	0.270101	Candidate endo-1,3-β-glucanase
16	Glycoside hydrolase	93445	e_gw1.52.8.1	621	0.42	0.61	0.53842	0.43	0.45	0.0655883	Candidate glucan endo-1,3-1,4-β-D-glucosidase
17	Glycoside hydrolase	141702	estExt_fgenesh1_pg.C_110155	1854	405.71	240.79	-0.752673	175.46	316.13	0.849376	Candidate glucan 1,3-β-glucosidase
17	Glycoside hydrolase	24326	estExt_Genemark1.C_50100	1958	19.64	28.77	0.55077	41.14	34.6	-0.24977	Candidate glucan 1,3 β-glucosidase/ glucan endo-1,3-β-glucosidase
17	Glycoside hydrolase	110434	estExt_Genewise1.C_8_t10213	1682	2177.85	658.09	-1.72655	1679.93	1375.64	-0.288298	Candidate glucan endo-1,3-β-glucosidase
17	Glycoside hydrolase	124460	estExt_fgenesh2_kg.C_190054	1319	289.76	313.6	0.114067	517.25	1055.61	1.02914	Candidate glucan endo-1,3-β-glucosidase
18	Glycoside hydrolase	33886	fgenesh1_pg.4_#_233	1203	243.66	8.04	-4.92153	24.51	46.61	0.927269	Candidate chitinase
18	Glycoside hydrolase	68186	e_gw1.1.1842.1	1074	2.75	4.25	0.628031	5.34	5.65	0.0814111	Candidate chitinase
18	Glycoside hydrolase	33168	fgenesh1_pg.3_#_46	1479	1.15	4.23	1.87902	5.58	5.26	-0.0852023	Candidate chitinase
18	Glycoside hydrolase	124526	estExt_fgenesh2_kg.C_210002	1494	1.13	3.64	1.68762	4.86	7.28	0.582982	Candidate chitinase
18	Glycoside hydrolase	124897	estExt_fgenesh2_kg.C_250073	1384	866.65	144.54	-2.58398	135.45	119.86	-0.17641	Candidate chitinase
18	Glycoside hydrolase	127688	fgenesh1_pm.3_#_277	3735	0.001	0.03	4.90689	0.03	0.001	-4.90689	Candidate chitinase
18	Glycoside hydrolase	130024	fgenesh1_pm.8_#_267	3810	-	-	-	-	-	-	Candidate chitinase
18	Glycoside hydrolase	69611	e_gw1.1.2483.1	4134	0.03	0.03	0	0.001	0.03	4.90689	Candidate chitinase
18	Glycoside hydrolase	79622	e_gw1.9.532.1	4602	0.84	1.25	0.573467	1.03	1.96	0.928209	Candidate chitinase
18	Glycoside hydrolase	114979	estExt_Genewise1.C_240185	1338	2	2.57	0.361768	2.91	3.99	0.45537	Candidate chitinase
18	Glycoside hydrolase	94061	estExt_Genewise1Plus.C_1_t20271	975	-	-	-	-	-	-	Candidate chitinase
18	Glycoside hydrolase	86290	e_gw1.19.245.1	1179	-	-	-	0.001	0.22	7.78136	Candidate chitinase
18	Glycoside hydrolase	133349	fgenesh1_pm.23_#_110	1206	0.3	0.69	1.20163	1.05	1.85	0.817136	Candidate chitinase
18	Glycoside hydrolase	104468	estExt_Genewise1Plus.C_330051	1303	-	-	-	0.001	0.3	8.22882	Candidate chitinase
18	Glycoside hydrolase	142123	estExt_fgenesh1_pg.C_150103	2849	1894.01	1712.82	-0.14507	1147.81	617.78	-0.893719	Candidate chitinase
18	Glycoside hydrolase	142298	estExt_fgenesh1_pg.C_170090	1212	10.09	3.05	-1.72605	4.59	1.08	-2.08746	Endo-N-acetyl-β-D-glucosaminidase
18	Glycoside hydrolase	122916	estExt_fgenesh2_kg.C_60126	1135	3.24	10.13	1.64457	12.64	10.54	-0.262122	Candidate Endo-N-acetyl-β-D-glucosaminidase
18	Glycoside hydrolase	33160	fgenesh1_pg.3_#_38	1131	-	-	-	-	-	-	Candidate chitinase
18	Glycoside hydrolase	69331	e_gw1.1.2213.1	1182	2.28	7.28	1.6749	7.39	9.54	0.368415	Candidate chitinase
18	Glycoside hydrolase	7503	gm1.3059_g	1032	-	-	-	-	-	-	Candidate chitinase
20	Glycoside hydrolase	99285	estExt_Genewise1Plus.C_9_t10299	1837	15.1	20.47	0.438963	34.7	39.83	0.19892	Candidate exochitinase
20	Glycoside hydrolase	104242	estExt_Genewise1Plus.C_300108	1867	226.01	97.8	-1.20848	169.34	74.7	-1.18074	Candidate exochitinase
20	Glycoside hydrolase	7256	gm1.2812_g	2127	0.96	0.33	-1.54057	0.58	0.42	-0.465664	Candidate N-acetyl-β-hexosaminidase
24	Glycoside hydrolase	37461	fgenesh1_pg.17_#_137	807	0.31	0.46	0.569366	0.001	0.84	9.71425	Candidate lysozyme
25	Glycoside hydrolase	13308	gm1.8864_g	687	-	-	-	0.39	2.2	2.49596	Candidate N,O-diacetylmuramidase
27	Glycoside hydrolase	71638	e_gw1.2.1794.1	1491	97.6	145.43	0.575372	48.92	164.88	1.75292	Candidate α-galactosidase
27	Glycoside hydrolase	84246	e_gw1.15.462.1	1491	0.16	0.001	-7.32193	0.001	0.09	6.49185	Candidate α-galactosidase
27	Glycoside hydrolase	6433	gm1.1989_g	1335	0.36	1.33	1.88536	1.51	3.41	1.17522	α-galactosidase
27	Glycoside hydrolase	58886	gw1.33.147.1	1215	0.2	0.29	0.536053	0.001	4.85	12.2438	Candidate α-galactosidase
27	Glycoside hydrolase	91133	e_gw1.31.149.1	1422	0.09	0.83	3.20511	0.09	0.82	3.18763	Candidate α-galactosidase
27	Glycoside hydrolase	75420	e_gw1.5.588.1	1866	1.22	2.07	0.76275	2.52	2.54	0.0114048	Candidate α-galactosidase
27	Glycoside hydrolase	39277	fgenesh1_pg.31_#_61	1875	3.26	29.15	3.16055	1.59	9.72	2.61193	α-galactosidase
27	Glycoside hydrolase	32557	fgenesh1_pg.2_#_85	1431	1.53	3.06	1	3.24	2.72	-0.252387	Candidate α-galactosidase
28	Glycoside hydrolase	91734	e_gw1.34.152.1	1218	0.001	0.2	7.64386	1.87	2.58	0.464333	Candidate polygalacturonase/xylogalacturonan hydrolase
28	Glycoside hydrolase	91667	e_gw1.34.52.1	1281	11.52	9.94	-0.212823	0.98	2.34	1.25565	Candidate exo-polygalacturonase
28	Glycoside hydrolase	133383	fgenesh1_pm.24_#_4	1140	1.4	1.68	0.263034	0.78	0.35	-1.15612	Candidate endo-polygalacturonase
30	Glycoside hydrolase	93498	e_gw1.54.21.1	1380	133.29	399.91	1.58511	4.19	49.65	3.56677	Candidate endo-β-1,4-xylanase
30	Glycoside hydrolase	90847	e_gw1.30.20.1	1398	1672.84	2036.27	0.283629	802.09	972.48	0.277904	Endo-β-1,4-xylanase
30	Glycoside hydrolase	74697	e_gw1.4.688.1	1473	0.001	0.8	9.64386	0.42	2.38	2.5025	Candidate glucan endo 1,6-β-glucanase
30	Glycoside hydrolase	134331	fgenesh1_pm.31_#_45	1431	0.08	0.17	1.08746	0.09	0.001	-6.49185	Candidate glucan endo 1,6-β-glucanase
30	Glycoside hydrolase	11580	gm1.7136_g	1440	4.55	9.12	1.00317	0.61	4.41	2.8539	Candidate endo-β-1 6-galactanase
31	Glycoside hydrolase	104546	estExt_Genewise1Plus.C_340127	2930	92.6	40.86	-1.18032	29.05	31.32	0.108546	Candidate α-glucosidase
31	Glycoside hydrolase	136825	estExt_fgenesh1_pm.C_60325	3093	12.78	43.77	1.77605	11.57	18.76	0.697271	Glucosidase II alpha subunit
31	Glycoside hydrolase	134448	fgenesh1_pm.33_#_16	2304	28.72	44.21	0.622317	8.01	75.97	3.24556	Candidate α-xylosidase/α-glucosidase
31	Glycoside hydrolase	76309	e_gw1.6.1061.1	2541	1.5	4.02	1.42223	2.37	1.9	-0.318888	Candidate α-glucosidase
35	Glycoside hydrolase	101346	estExt_Genewise1Plus.C_15_t10124	3072	2.24	3.27	0.545792	2.27	6.34	1.48179	β-galactosidase
36	Glycoside hydrolase	83083	e_gw1.13.574.1	2682	1.28	1.6	0.321928	2.65	4.59	0.792502	Candidate raffinose synthase domain protein
36	Glycoside hydrolase	12566	gm1.8122_g	2241	2.61	10.54	2.01375	7.15	12.52	0.808219	α-galactosidase
37	Glycoside hydrolase	99403	estExt_Genewise1Plus.C_9_t20014	2692	21.92	43.49	0.988436	61.54	70.53	0.196713	Candidate α,α-trehalase
37	Glycoside hydrolase	102372	estExt_Genewise1Plus.C_19_t10169	2061	5.17	2.43	-1.08921	3.42	5.09	0.573669	Candidate α,α-trehalase
38	Glycoside hydrolase	128386	fgenesh1_pm.4_#_383	3234	4.1	23.64	2.52753	28.18	45.3	0.684839	Candidate α-mannosidase
39	Glycoside hydrolase	93450	e_gw1.52.39.1	1368	0.09	0.001	-6.49185	0.001	0.67	9.38802	Candidate β-xylosidase
43	Glycoside hydrolase	77521	e_gw1.7.292.1	1662	16.39	23.06	0.492577	3.22	8.76	1.44387	Candidate β-xylosidase/α-L-arabinofuranosidase
43	Glycoside hydrolase	133200	fgenesh1_pm.22_#_120	1512	29.77	59.95	1.0099	40.02	57.53	0.523593	Candidate β-xylosidase/α-L-arabinofuranosidase
45	Glycoside hydrolase	25940	estExt_Genemark1.C_170165	856	875.97	3683.88	2.07227	89.18	758.42	3.0882	Endo-β-1,4-glucanase
47	Glycoside hydrolase	122299	estExt_fgenesh2_kg.C_30017	2115	3.9	10.25	1.39408	12.54	32.55	1.37612	α-1,2-mannosidase
47	Glycoside hydrolase	6341	gm1.1897_g	2100	27.67	83.83	1.59914	24.63	44.35	0.848517	Candidate α-1,2-mannosidase
47	Glycoside hydrolase	91275	e_gw1.31.2.1	1800	1.2	3.06	1.3505	2.83	3.43	0.277407	Candidate α-1,2-mannosidase
47	Glycoside hydrolase	101105	estExt_Genewise1Plus.C_14_t10298	2104	16.71	14.24	-0.230763	11.85	12.75	0.10561	Candidate α-1,2-mannosidase
47	Glycoside hydrolase	83445	e_gw1.14.499.1	1695	16.56	50.18	1.59941	9.03	25.68	1.50785	Candidate α-1,2-mannosidase
47	Glycoside hydrolase	25284	estExt_Genemark1.C_110133	1890	168.08	280.67	0.739727	123.88	170.31	0.45922	Candidate α-1,2-mannosidase
47	Glycoside hydrolase	24645	estExt_Genemark1.C_70076	3514	45.47	47.51	0.0633162	32.93	51.88	0.655776	Candidate α-1,2-mannosidase
47	Glycoside hydrolase	82309	e_gw1.12.454.1	3213	2.06	14.93	2.8575	4.18	5.82	0.477516	Candidate α-mannosidase
54	Glycoside hydrolase	72252	e_gw1.2.83.1	1533	1.18	1.69	0.518236	0.98	2.45	1.32193	Candidate α-L-arabinofuranosidase
54	Glycoside hydrolase	102517	estExt_Genewise1Plus.C_19_t20059	1738	0.48	1.96	2.02975	0.57	4.89	3.1008	α-L-arabinofuranosidase I
55	Glycoside hydrolase	25104	estExt_Genemark1.C_100031	3128	11.77	5.02	-1.22936	6.64	8.28	0.318448	Candidate exo-1 3-β-glucanase
55	Glycoside hydrolase	68137	e_gw1.1.896.1	2295	0.26	1.06	2.02748	2.36	1.39	-0.763702	Candidate β-1,3-glucanase
55	Glycoside hydrolase	93142	e_gw1.47.32.1	2292	9.63	6.29	-0.614476	10.69	4.28	-1.32058	Candidate β-1,3-glucanase
55	Glycoside hydrolase	9578	gm1.5134_g	2280	0.05	0.61	3.60881	0.7	0.56	-0.321928	Candidate β-1,3-glucanase
55	Glycoside hydrolase	73541	e_gw1.3.1608.1	2295	0.05	0.56	3.48543	0.05	1.05	4.39232	Candidate β-1 3-glucanase
55	Glycoside hydrolase	7681	gm1.3237_g	2403	0.25	0.29	0.214125	1.38	0.74	-0.899071	Candidate exo-1,3-β-glucanase
61	Glycoside hydrolase	139633	estExt_fgenesh1_pg.C_1_t10124	1297	1498.49	5202.97	1.79583	560.88	385.12	-0.542384	Candidate copper-dependent polysaccharide monooxygenase/endo-β-1,4-glucanase
61	Glycoside hydrolase	122518	estExt_fgenesh2_kg.C_40049	972	1265.06	403.41	-1.64889	2.51	65.35	4.70243	Candidate copper-dependent polysaccharide monooxygenase
61	Glycoside hydrolase	97768	estExt_Genewise1Plus.C_6_t10338	1372	49.87	12.1	-2.04317	16.48	13.65	-0.271815	Candidate copper-dependent polysaccharide monooxygenase
61	Glycoside hydrolase	135815	estExt_fgenesh1_pm.C_2_t10189	815	0.15	0.15	0	-	-	-	Candidate copper-dependent polysaccharide monooxygenase
61	Glycoside hydrolase	71162	e_gw1.2.1974.1	1095	30.33	7.24	-2.06668	3.95	7.58	0.940345	Candidate copper-dependent polysaccharide monooxygenase
61	Glycoside hydrolase	75252	e_gw1.5.387.1	1137	0.43	1.26	1.55102	3.8	1.04	-1.86942	Candidate copper-dependent polysaccharide monooxygenase
62	Glycoside hydrolase	118070	fgenesh2_kg.4_#_2_#_AAP57750.1	969	26.1	147.24	2.49605	2.25	12.21	2.44007	Candidate α-L-arabinofuranosidase
63	Glycoside hydrolase	98040	estExt_Genewise1Plus.C_6_t20487	2534	25.39	71.44	1.49247	15.94	24.57	0.624246	Candidate processing α-glucosidase
63	Glycoside hydrolase	135758	estExt_fgenesh1_pm.C_2_t10060	3045	45.16	53.2	0.236381	94.42	77.33	-0.288064	Candidate α-glucosidase
64	Glycoside hydrolase	85417	e_gw1.17.504.1	1296	0.001	0.28	8.12928	0.97	0.1	-3.27798	Candidate endo-1,3-β-glucanase
64	Glycoside hydrolase	103255	estExt_Genewise1Plus.C_230222	1454	0.001	1.71	10.7398	-	-	-	Candidate endo-1,3-β-glucanase
64	Glycoside hydrolase	125426	estExt_fgenesh2_kg.C_410009	721	0.53	0.52	-0.0274807	1.28	0.19	-2.75207	Candidate endo-1,3-β-glucanase
64	Glycoside hydrolase	125427	estExt_fgenesh2_kg.C_410010	593	0.44	0.64	0.540568	1.82	0.47	-1.95321	Candidate endo-1,3-β-glucanase
65	Glycoside hydrolase	139320	estExt_fgenesh1_pm.C_350025	3320	147.78	104.19	-0.504234	198.51	75.92	-1.38666	Candidate endo-1,3-β-glucanase
67	Glycoside hydrolase	90302	e_gw1.28.118.1	2544	248.69	310.9	0.322102	22.05	118.69	2.42835	Candidate α,α-trehalase
71	Glycoside hydrolase	94877	estExt_Genewise1Plus.C_1_t50475	1781	1.15	2.96	1.36396	7.25	3.75	-0.95109	α-Glucuronidase
71	Glycoside hydrolase	131175	fgenesh1_pm.12_#_217	1815	0.07	0.19	1.44057	0.27	0.42	0.63743	Candidate α-1 3-glucanase
71	Glycoside hydrolase	108342	estExt_Genewise1.C_4_t10045	2061	0.29	0.34	0.229482	0.12	7.2	5.90689	Candidate α-1 3-glucanase
71	Glycoside hydrolase	75378	e_gw1.5.241.1	1284	3.13	2.04	-0.617594	3.14	1.63	-0.945893	Candidate α-1 3-glucanase
72	Glycoside hydrolase	113858	estExt_Genewise1.C_18_t10386	1830	983.88	870.55	-0.176555	1313.9	2040.61	0.635145	Candidate α-1 3-glucanase
72	Glycoside hydrolase	103899	estExt_Genewise1Plus.C_280058	1796	316.77	811.55	1.35724	533.66	512.39	-0.0586786	Candidate β-1 3-glucanosyltransferase
72	Glycoside hydrolase	9074	gm1.4630_g	1437	144.22	60.43	-1.25493	88.44	148	0.742826	Candidate β-1 3-glucanosyltransferase
72	Glycoside hydrolase	98936	estExt_Genewise1Plus.C_8_t10451	1476	5.01	4.48	-0.161312	10.52	8.69	-0.275707	Candidate β-1 3-glucanosyltransferase
72	Glycoside hydrolase	124639	estExt_fgenesh2_kg.C_220055	1893	261.97	51.79	-2.33866	358.86	482.52	0.427168	Candidate β-1 3-glucanosyltransferase
74	Glycoside hydrolase	111943	estExt_Genewise1.C_11_t20268	2677	320.96	358.62	0.160062	20.42	120.08	2.55594	Candidate β-1 3-glucanosyltransferase
75	Glycoside hydrolase	65927	gw1.9.846.1	687	0.19	0.001	-7.56986	0.001	0.4	8.64386	Xyloglucanase
75	Glycoside hydrolase	13025	gm1.8581_g	708	0.001	0.88	9.78136	0.75	3.09	2.04264	Candidate chitosanase
75	Glycoside hydrolase	57859	gw1.19.412.1	762	0.17	0.001	-7.40939	0.001	0.18	7.49185	Candidate chitosanase
76	Glycoside hydrolase	111549	estExt_Genewise1.C_11_t10005	2245	73.51	73.29	-0.00432416	98.09	126.75	0.369808	Candidate chitosanase
76	Glycoside hydrolase	103113	estExt_Genewise1Plus.C_220324	1499	213.73	207.4	-0.0433735	105.88	50.19	-1.07696	Candidate α-1,6-mannanase
76	Glycoside hydrolase	12022	gm1.7578_g	1383	37.16	69.33	0.899729	156.07	111.58	-0.484115	Candidate α-1,6-mannanase
76	Glycoside hydrolase	112243	estExt_Genewise1.C_12_t20163	1737	0.35	0.001	-8.45121	0.5	0.44	-0.184425	Candidate α-1,6-mannanase
76	Glycoside hydrolase	138266	estExt_fgenesh1_pm.C_160216	1744	72.78	46.22	-0.655025	98.61	53.77	-0.874932	Candidate α-1,6-mannanase
76	Glycoside hydrolase	126869	fgenesh1_pm.2_#_194	1431	32.72	40.02	0.290548	7.1	42.17	2.57033	Candidate α-1,6-mannanase
76	Glycoside hydrolase	23689	estExt_Genemark1.C_2_t10292	1348	3.25	7.48	1.2026	13.9	18.06	0.377713	Candidate α-1,6-mannanase
76	Glycoside hydrolase	70100	e_gw1.1.2325.1	1728	0.14	2.51	4.16419	0.07	1.41	4.3322	Candidate α-1,6-mannanase
78	Glycoside hydrolase	74937	e_gw1.4.66.1	2064	-	-	-	0.001	0.12	6.90689	Candidate α-1,6-mannanase
79	Glycoside hydrolase	69609	e_gw1.1.724.1	1467	0.08	0.08	0	0.09	0.44	2.28951	Candidate α-L-rhamnosidase
79	Glycoside hydrolase	74991	e_gw1.4.279.1	1557	0.001	0.08	6.32193	0.08	0.001	-6.32193	Candidate β-glucuronidase
79	Glycoside hydrolase	34542	fgenesh1_pg.6_#_117	1629	1.11	3.25	1.54988	2.22	4.36	0.973768	Candidate β-glucuronidase
79	Glycoside hydrolase	73238	e_gw1.3.898.1	1560	-	-	-	-	-	-	Candidate β-glucuronidase
81	Glycoside hydrolase	34584	fgenesh1_pg.6_#_159	2592	-	-	-	0.001	0.05	5.64386	Candidate β-glucuronidase
81	Glycoside hydrolase	100837	estExt_Genewise1Plus.C_13_t10407	2501	0.67	2.64	1.9783	2.95	2.69	-0.133109	Candidate endo-1,3-β-glucanase
89	Glycoside hydrolase	71653	e_gw1.2.918.1	2244	4.09	3.99	-0.0357121	6.15	13.01	1.08096	Candidate endo-1,3-β-glucanase
89	Glycoside hydrolase	91218	e_gw1.31.136.1	2289	0.16	0.05	-1.67807	0.22	2.73	3.63333	Candidate α-N-acetylglucosaminidase
92	Glycoside hydrolase	94562	estExt_Genewise1Plus.C_1_t40343	2424	0.93	0.57	-0.706269	0.51	3.88	2.92749	Candidate α-N-acetylglucosaminidase
92	Glycoside hydrolase	90881	e_gw1.30.65.1	2415	-	-	-	-	-	-	Candidate α-1,2-mannosidase
92	Glycoside hydrolase	25615	estExt_Genemark1.C_140071	2401	13.1	4.84	-1.43649	5.07	10.76	1.08562	Candidate α-1,2-mannosidase
92	Glycoside hydrolase	8140	gm1.3696_g	2460	0.05	0.001	-5.64386	0.001	1.09	10.0901	Candidate α-1,2-mannosidase
92	Glycoside hydrolase	71164	e_gw1.2.319.1	2382	1.95	5.75	1.56009	2.37	2.67	0.171953	Candidate α-1,2-mannosidase
92	Glycoside hydrolase	6566	gm1.2122_g	2562	2.88	7.1	1.30175	4.31	3.87	-0.155354	Candidate α-1,2-mannosidase
92	Glycoside hydrolase	90943	e_gw1.30.70.1	2415	0.001	0.24	7.90689	0.001	0.05	5.64386	Candidate α-1,2-mannosidase
95	Glycoside hydrolase	133728	fgenesh1_pm.26_#_74	2388	0.35	1.51	2.10912	1.08	1.28	0.245112	Candidate α-1,2-mannosidase
95	Glycoside hydrolase	39268	fgenesh1_pg.31_#_52	2316	0.26	0.2	-0.378512	0.11	0.44	2	Candidate α-L-fucosidase
95	Glycoside hydrolase	38400	fgenesh1_pg.23_#_96	2412	4.2	5.25	0.321928	0.56	4.85	3.11449	Candidate α-L-fucosidase
95	Glycoside hydrolase	128297	fgenesh1_pm.4_#_294	2385	4.3	9.74	1.17959	3.51	11.37	1.69569	Candidate α-L-fucosidase
105	Glycoside hydrolase	78749	e_gw1.8.207.1	1023	0.6	2.12	1.82103	0.001	2.46	11.2644	Candidate α-L-fucosidase
105	Glycoside hydrolase	6699	gm1.2255_g	1119	0.99	2.36	1.25329	0.11	0.82	2.89812	Candidate rhamnogalacturonyl hydrolase
115	Glycoside hydrolase	25542	estExt_Genemark1.C_130146	3085	2.46	18.71	2.92708	13.26	55.24	2.05863	Candidate rhamnogalacturonyl hydrolase
7	Polysaccharide Lyase	68025	e_gw1.1.1484.1	747	-	-	-	0.18	0.18	0	Candidate xylan-α-1,2-glucuronidase or α-(4-O-methyl)-glucuronidase
7	Polysaccharide Lyase	86743	e_gw1.19.10.1	759	-	-	-	-	-	-	Candidate alginate lyase
8	Polysaccharide Lyase	12151	gm1.7707_g	2358	5.2	2.86	-0.862496	3.39	10.69	1.6569	Candidate alginate lyase
20	Polysaccharide lyase	67965	e_gw1.1.2526.1	777	0.65	3.65	2.48938	1.18	1.92	0.702319	Candidate chondroitin lyase
20	Polysaccharide lyase	39997	fgenesh1_pg.54_#_7	777	0.32	0.001	-8.32193	0.001	0.35	8.45121	Glucuronan hydrolase
NA	Glycoside hydrolase	8591	gm1.4147_g	1839	-	-	-	0.001	0.07	6.12928	Candidate endo-β-1,4-glucuronan lyase
NA	Glycoside hydrolase	74989	e_gw1.4.1205.1	1230	0.3	0.87	1.53605	1.85	3.51	0.923946	Candidate xylosidase
