# Supplementary material for: Global Reprogramming of Gene Transcription in Trichoderma reesei by Overexpressing an Artificial Transcription Factor for Improved Cellulase Production and Identification of Ypr1 as an Associated Regulator
Source: Front Bioeng Biotechnol. 2020 Jul 3;8:649. doi: 10.3389/fbioe.2020.00649 (PMC7351519; doi:10.3389/fbioe.2020.00649)
Supplement: Supplementary file 6 [file Table_6.XLSX]

## Sheet: Protein processing
DEGs of protein processing and secretion between T. reesei U5 and Rut-C30
GeneID	Model Name	Description	Length	log2 Ratio 24 h (U5/C30)	log2 Ratio 48 h (U5/C30)	P-value 24 h (U5/C30)	FDR 24 h (U5/C30)	P-value 48 h (U5/C30)	FDR 48 h (U5/C30)	cog	cog_description	pfam	swissprot
4496	gm1.52_g	LexA/Signal peptidase	564	1.42572	0.301334	4.63e-07	1.07e-06	0.188666	0.274818	COG0681(J:Translation, ribosomal structure and biogenesis)	COG0681(translation initiation factor)	PF00717.23(Peptidase_S24:Peptidase S24-like)	sp|Q9UST2|IMP2L_SCHPO(Mitochondrial inner membrane protease subunit 2 OS=Schizosaccharomyces pombe (strain 972 / ATCC 24843) OX=284812 GN=SPBC336.13c PE=3 SV=1)
4650	gm1.206_g	FKBP-like protein	378	1.58012	-0.00603323	1.1e-05	2.32e-05	0.975418	0.981143	COG0760(S:Function unknown)	COG0760(-)	PF13616.6(Rotamase_3:PPIC-type PPIASE domain); PF00639.21(Rotamase:PPIC-type PPIASE domain); PF13145.6(Rotamase_2:PPIC-type PPIASE domain)	sp|Q4I665|PIN4_GIBZE(Peptidyl-prolyl cis-trans isomerase PIN4 OS=Gibberella zeae (strain PH-1 / ATCC MYA-4620 / FGSC 9075 / NRRL 31084) OX=229533 GN=PIN4 PE=3 SV=2)
4842	gm1.398_g	hypothetical protein	1131	2.06154	0.231749	5.35e-06	1.15e-05	0.437068	0.545466
5232	gm1.788_g	COP9 signalosome subunit 7	840	1.96683	-0.4395	4.89e-14	1.63e-13	0.0316796	0.0584572	ENOG410XP7W(O:Posttranslational modification, protein turnover, chaperones)	ENOG410XP7W(COP9 (constitutive photomorphogenic) homolog, subunit)	PF01399.27(PCI:PCI domain)	sp|Q7SGS1|CSN7A_NEUCR(COP9 signalosome complex subunit 7a OS=Neurospora crassa (strain ATCC 24698 / 74-OR23-1A / CBS 708.71 / DSM 1257 / FGSC 987) OX=367110 GN=csn-7a PE=1 SV=1)
5603	gm1.1159_g	hypothetical protein	1254	1.51422	-0.138582	1.34e-18	5.24e-18	0.210896	0.30197	COG1310(U:Intracellular trafficking, secretion, and vesicular transport)	COG1310(Involved in nuclear export, actin cytoskeleton organization and vesicular transport (By similarity))	PF13012.6(MitMem_reg:Maintenance of mitochondrial structure and function); PF01398.21(JAB:JAB1/Mov34/MPN/PAD-1 ubiquitin protease)	sp|Q7S8C8|CSN6_NEUCR(COP9 signalosome complex subunit 6 OS=Neurospora crassa (strain ATCC 24698 / 74-OR23-1A / CBS 708.71 / DSM 1257 / FGSC 987) OX=367110 GN=csn-6 PE=1 SV=1)
5621	gm1.1177_g	putative beta-1%2C4-mannosyltransferase	1425	0.689199	0.0252794	2.48e-07	5.83e-07	0.869548	0.909859	COG0438(S:Function unknown)	COG0438(-)	PF13692.6(Glyco_trans_1_4:Glycosyl transferases group 1); PF00534.20(Glycos_transf_1:Glycosyl transferases group 1)	sp|D4AZD1|ALG1_ARTBC(Chitobiosyldiphosphodolichol beta-mannosyltransferase OS=Arthroderma benhamiae (strain ATCC MYA-4681 / CBS 112371) OX=663331 GN=ARB_01551 PE=3 SV=1)
5702	gm1.1258_g	ATP-dependent protease La	3336	1.66106	-0.770855	0	0	4.42674e-105	9.89494e-104	COG0466(O:Posttranslational modification, protein turnover, chaperones)	COG0466(ATP-dependent serine protease that mediates the selective degradation of mutant and abnormal proteins as well as certain short-lived regulatory proteins. Required for cellular homeostasis and for survival from DNA damage and developmental changes induced by stress. Degrades polypeptides processively to yield small peptide fragments that are 5 to 10 amino acids long. Binds to DNA in a doub…	PF05362.13(Lon_C:Lon protease (S16) C-terminal proteolytic domain); PF02190.16(LON_substr_bdg:ATP-dependent protease La (LON) substrate-binding domain); PF00004.29(AAA:ATPase family associated with various cellular activities (AAA)); PF07728.14(AAA_5:AAA domain (dynein-related subfamily)); PF07724.14(AAA_2:AAA domain (Cdc48 subfamily)); PF13541.6(ChlI:Subunit ChlI of Mg-chelatase); PF13401.6(AAA_…	sp|Q7S8C4|LONM_NEUCR(Lon protease homolog, mitochondrial OS=Neurospora crassa (strain ATCC 24698 / 74-OR23-1A / CBS 708.71 / DSM 1257 / FGSC 987) OX=367110 GN=pim1 PE=3 SV=1)
5727	gm1.1283_g	hypothetical protein	2700	0.300395	1.78905	0.277014	0.338643	1.01076e-10	4.66049e-10	ENOG410YZQQ(S:Function unknown)	ENOG410YZQQ(-)
6054	gm1.1610_g	hypothetical protein	1797	0.77596	0.407317	6.28e-07	1.44e-06	0.00179989	0.00424252	ENOG410YS3M(S:Function unknown)	ENOG410YS3M(Tubulin folding cofactor E)	PF01302.25(CAP_GLY:CAP-Gly domain); PF13855.6(LRR_8:Leucine rich repeat)	sp|Q32KS0|TBCE_BOVIN(Tubulin-specific chaperone E OS=Bos taurus OX=9913 GN=TBCE PE=2 SV=1)
6132	gm1.1688_g	proteasome subunit beta type 7 precursor	816	1.26192	-0.138177	1.21e-54	1.01e-53	0.0598358	0.10237	COG0638(S:Function unknown)	COG0638(cell cycle inhibitor Nif1)	PF00227.26(Proteasome:Proteasome subunit); PF12465.8(Pr_beta_C:Proteasome beta subunits C terminal)	sp|Q09841|PSB2_SCHPO(Probable proteasome subunit beta type-2 OS=Schizosaccharomyces pombe (strain 972 / ATCC 24843) OX=284812 GN=pup1 PE=2 SV=1)
6185	gm1.1741_g	hypothetical protein	1104	0.753484	0.594401	2.82e-13	9.1e-13	9.78664e-12	4.78171e-11	ENOG4111P8A(S:Function unknown)	ENOG4111P8A(peroxisomal biogenesis factor 14)	PF04695.13(Pex14_N:Peroxisomal membrane anchor protein (Pex14p) conserved region)	sp|Q9HG09|PEX14_PICPA(Peroxisomal membrane protein PEX14 OS=Komagataella pastoris OX=4922 GN=PEX14 PE=1 SV=1)
6253	gm1.1809_g	hypothetical protein	864	-0.22697	0.674549	0.165983	0.214289	5.63844e-11	2.64461e-10	ENOG41121N2(S:Function unknown)	ENOG41121N2(Involucrin repeat protein)	PF13639.6(zf-RING_2:Ring finger domain); PF12678.7(zf-rbx1:RING-H2 zinc finger domain); PF12861.7(zf-ANAPC11:Anaphase-promoting complex subunit 11 RING-H2 finger); PF13923.6(zf-C3HC4_2:Zinc finger, C3HC4 type (RING finger)); PF00097.25(zf-C3HC4:Zinc finger, C3HC4 type (RING finger)); PF14634.6(zf-RING_5:zinc-RING finger domain); PF13445.6(zf-RING_UBOX:RING-type zinc-finger); PF14447.6(Prok-RING_4…	sp|Q20798|HRD1_CAEEL(E3 ubiquitin-protein ligase hrd-1 OS=Caenorhabditis elegans OX=6239 GN=sel-11 PE=3 SV=1)
7087	gm1.2643_g	geranylgeranyltransferase beta subunit	984	1.271	0.582776	5.73e-30	3.13e-29	1.07438e-11	5.2383e-11	COG5029(O:Posttranslational modification, protein turnover, chaperones)	COG5029(beta SUBUNIT)	PF00432.21(Prenyltrans:Prenyltransferase and squalene oxidase repeat); PF13243.6(SQHop_cyclase_C:Squalene-hopene cyclase C-terminal domain)	sp|P20133|PGTB2_YEAST(Geranylgeranyl transferase type-2 subunit beta OS=Saccharomyces cerevisiae (strain ATCC 204508 / S288c) OX=559292 GN=BET2 PE=1 SV=3)
7378	gm1.2934_g	AAA family ATPase	2358	1.35423	-0.011588	0.00013224	0.000253682	0.969332	0.982067	COG0464(O:Posttranslational modification, protein turnover, chaperones)	COG0464(Aaa atpase)	PF00004.29(AAA:ATPase family associated with various cellular activities (AAA)); PF17862.1(AAA_lid_3:AAA+ lid domain); PF05496.12(RuvB_N:Holliday junction DNA helicase RuvB P-loop domain)	sp|P32794|AFG2_YEAST(ATPase family gene 2 protein OS=Saccharomyces cerevisiae (strain ATCC 204508 / S288c) OX=559292 GN=AFG2 PE=1 SV=1)
7560	gm1.3116_g	LexA/Signal peptidase	498	2.29123	1.27601	0.000255276	0.000478433	0.00840544	0.0175942	COG0681(U:Intracellular trafficking, secretion, and vesicular transport)	COG0681(Signal peptidase i)	PF10502.9(Peptidase_S26:Signal peptidase, peptidase S26); PF00717.23(Peptidase_S24:Peptidase S24-like)	sp|O74800|IMP1_SCHPO(Mitochondrial inner membrane protease subunit 1 OS=Schizosaccharomyces pombe (strain 972 / ATCC 24843) OX=284812 GN=imp1 PE=3 SV=1)
7614	gm1.3170_g	hypothetical protein	5271	1.05382	-0.113765	4.09e-24	1.92e-23	0.131609	0.202176	ENOG410XV7A(S:Function unknown)	ENOG410XV7A(HATPase_c domain protein)	PF12449.8(DUF3684:Protein of unknown function (DUF3684)); PF13589.6(HATPase_c_3:Histidine kinase-, DNA gyrase B-, and HSP90-like ATPase)
8037	gm1.3593_g	TBCC-domain containing protein	1089	1.53366	-0.544967	1.77e-70	1.75e-69	5.12336e-21	3.66113e-20	ENOG410Y28B(O:Posttranslational modification, protein turnover, chaperones)	ENOG410Y28B(Tubulin folding cofactor C)	PF07986.12(TBCC:Tubulin binding cofactor C); PF16752.5(TBCC_N:Tubulin-specific chaperone C N-terminal domain)	sp|Q5R5J7|TBCC_PONAB(Tubulin-specific chaperone C OS=Pongo abelii OX=9601 GN=TBCC PE=2 SV=1)
8116	gm1.3672_g	expressed protein	897	-0.70164	0.98714	6.25e-44	4.43e-43	4.91062e-157	1.68307e-155	ENOG4111WHY(S:Function unknown)	ENOG4111WHY(WSC domain)	PF01822.19(WSC:WSC domain); PF08693.10(SKG6:Transmembrane alpha-helix domain)
8367	gm1.3923_g	expressed protein	798	0.814604	0.828821	0.00218184	0.00372814	1.18195e-18	7.84634e-18	ENOG410Y69I(S:Function unknown)	ENOG410Y69I(-)
8451	gm1.4007_g	Cyclophilin-like protein	501	-0.378148	-0.173722	0.125162	0.166347	0.452422	0.561222	COG0652(K:Transcription)	COG0652(Transcription factor)	PF00160.21(Pro_isomerase:Cyclophilin type peptidyl-prolyl cis-trans isomerase/CLD)	sp|Q4IPB8|PPIL3_GIBZE(Peptidyl-prolyl cis-trans isomerase-like 3 OS=Gibberella zeae (strain PH-1 / ATCC MYA-4620 / FGSC 9075 / NRRL 31084) OX=229533 GN=CYP10 PE=3 SV=2)
8628	gm1.4184_g	Prefoldin	357	0.564541	0.327385	9.37e-07	2.12e-06	0.00256248	0.00590909	ENOG41124ZP(S:Function unknown)	ENOG41124ZP(Prefoldin subunit)	PF01920.20(Prefoldin_2:Prefoldin subunit)	sp|O14334|PFD1_SCHPO(Probable prefoldin subunit 1 OS=Schizosaccharomyces pombe (strain 972 / ATCC 24843) OX=284812 GN=SPBC1D7.01 PE=3 SV=1)
8667	gm1.4223_g	Prefoldin alpha subunit	462	0.342508	0.870139	0.0229476	0.034537	6.71276e-15	3.82747e-14	COG1730(O:Posttranslational modification, protein turnover, chaperones)	COG1730(Molecular chaperone capable of stabilizing a range of proteins. Seems to fulfill an ATP-independent, HSP70-like function in archaeal de novo protein folding (By similarity))	PF02996.17(Prefoldin:Prefoldin subunit); PF05010.14(TACC_C:Transforming acidic coiled-coil-containing protein (TACC), C-terminal)	sp|O94307|PFD5_SCHPO(Probable prefoldin subunit 5 OS=Schizosaccharomyces pombe (strain 972 / ATCC 24843) OX=284812 GN=bob1 PE=1 SV=1)
8883	gm1.4439_g	hypothetical protein	2310	-0.736098	-0.0783139	1.67e-35	1.03e-34	0.0153472	0.030464	ENOG4111FT1(T:Signal transduction mechanisms)	ENOG4111FT1(protein phosphatase 1, regulatory subunit)	PF03370.13(CBM_21:Carbohydrate/starch-binding module (family 21)); PF16760.5(CBM53:Starch/carbohydrate-binding module (family 53))	sp|Q9UQK1|PPR3C_HUMAN(Protein phosphatase 1 regulatory subunit 3C OS=Homo sapiens OX=9606 GN=PPP1R3C PE=1 SV=2)
8938	gm1.4494_g	YVTN repeat-like/Quinoprotein amine dehydrogenase	1146	-1.26503	-1.05031	1.86e-07	4.4e-07	0.00127868	0.00308872	ENOG410ZEZA(S:Function unknown)	ENOG410ZEZA(WD domain, G-beta repeat)	PF00400.32(WD40:WD domain, G-beta repeat)	sp|O35828|CORO7_RAT(Coronin-7 OS=Rattus norvegicus OX=10116 GN=Coro7 PE=1 SV=2)
9100	gm1.4656_g	hypothetical protein	423	0.0948963	-0.744813	0.890906	0.917269	0.0706924	0.11817
9195	gm1.4751_g	TPR-like protein	1983	1.09261	-0.0163018	5.74e-07	1.32e-06	0.92083	0.950514	ENOG410XPS3(D:Cell cycle control, cell division, chromosome partitioning)	ENOG410XPS3(cell division cycle)	PF04049.13(ANAPC8:Anaphase promoting complex subunit 8 / Cdc23); PF00515.28(TPR_1:Tetratricopeptide repeat); PF13181.6(TPR_8:Tetratricopeptide repeat); PF13428.6(TPR_14:Tetratricopeptide repeat); PF13432.6(TPR_16:Tetratricopeptide repeat); PF13414.6(TPR_11:TPR repeat)	sp|O94556|APC8_SCHPO(Anaphase-promoting complex subunit 8 OS=Schizosaccharomyces pombe (strain 972 / ATCC 24843) OX=284812 GN=cut23 PE=1 SV=2)
9392	gm1.4948_g	UBC-like protein	1338	0.964209	0.291025	3.62e-07	8.4e-07	0.0197751	0.0383164	ENOG410XP8C(O:Posttranslational modification, protein turnover, chaperones)	ENOG410XP8C(ubiquitin-conjugating enzyme)	PF00179.26(UQ_con:Ubiquitin-conjugating enzyme)	sp|Q9H832|UBE2Z_HUMAN(Ubiquitin-conjugating enzyme E2 Z OS=Homo sapiens OX=9606 GN=UBE2Z PE=1 SV=2)
9405	gm1.4961_g	hypothetical protein	6378	0.697701	0.0336969	3.21e-21	1.38e-20	0.56172	0.650746	ENOG410XPQU(O:Posttranslational modification, protein turnover, chaperones)	ENOG410XPQU(ubiquitin protein ligase E3 component (N-recognin))	PF02207.20(zf-UBR:Putative zinc finger in N-recognin (UBR box)); PF02617.17(ClpS:ATP-dependent Clp protease adaptor protein ClpS)	sp|O60152|UBR1_SCHPO(E3 ubiquitin-protein ligase ubr1 OS=Schizosaccharomyces pombe (strain 972 / ATCC 24843) OX=284812 GN=ubr1 PE=3 SV=1)
9776	gm1.5332_g	WD40 repeat-like protein	1533	2.81601	0.0921182	5.26e-15	1.83e-14	0.710892	0.777979	ENOG410XQ8I(D:Cell cycle control, cell division, chromosome partitioning)	ENOG410XQ8I(Cell division cycle 20)	PF00400.32(WD40:WD domain, G-beta repeat); PF12894.7(ANAPC4_WD40:Anaphase-promoting complex subunit 4 WD40 domain); PF08662.11(eIF2A:Eukaryotic translation initiation factor eIF2A); PF16529.5(Ge1_WD40:WD40 region of Ge1, enhancer of mRNA-decapping protein)	sp|P78972|SLP1_SCHPO(WD repeat-containing protein slp1 OS=Schizosaccharomyces pombe (strain 972 / ATCC 24843) OX=284812 GN=slp1 PE=1 SV=1)
9896	gm1.5452_g	E3 ubiquitin-protein ligase	3441	1.50024	-0.431886	4.21e-52	3.37e-51	1.81704e-08	7.1736e-08	COG5021(O:Posttranslational modification, protein turnover, chaperones)	COG5021(ubiquitin protein ligase)	PF00632.25(HECT:HECT-domain (ubiquitin-transferase))	sp|Q1K9C4|YFK7_SCHPO(Probable E3 ubiquitin protein ligase C167.07c OS=Schizosaccharomyces pombe (strain 972 / ATCC 24843) OX=284812 GN=SPAC167.07c PE=2 SV=1)
9970	gm1.5526_g	glutathione S-transferase II	795	3.00044	1.72103	3.55e-72	3.57e-71	9.86186e-40	1.07493e-38	COG0625(S:Function unknown)	COG0625(Conserved hypothetical, protein)	PF02798.20(GST_N:Glutathione S-transferase, N-terminal domain); PF00043.25(GST_C:Glutathione S-transferase, C-terminal domain); PF13409.6(GST_N_2:Glutathione S-transferase, N-terminal domain); PF14497.6(GST_C_3:Glutathione S-transferase, C-terminal domain); PF13417.6(GST_N_3:Glutathione S-transferase, N-terminal domain); PF13410.6(GST_C_2:Glutathione S-transferase, C-terminal domain)	sp|Q0CCY0|GEDE_ASPTN(Glutathione S-transferase-like protein gedE OS=Aspergillus terreus (strain NIH 2624 / FGSC A1156) OX=341663 GN=gedE PE=1 SV=1)
10131	gm1.5687_g	hypothetical protein	1527	0.49565	0.0147322	2.96e-06	6.5e-06	0.912568	0.944515	COG1179(H:Coenzyme transport and metabolism)	COG1179(uba thif-type nad fad binding protein)	PF00899.21(ThiF:ThiF family); PF03435.18(Sacchrp_dh_NADP:Saccharopine dehydrogenase NADP binding domain)	sp|P36101|TCD2_YEAST(tRNA threonylcarbamoyladenosine dehydratase 2 OS=Saccharomyces cerevisiae (strain ATCC 204508 / S288c) OX=559292 GN=TCD2 PE=1 SV=1)
10450	gm1.6006_g	hypothetical protein	420	-0.314323	-0.014627	0.201132	0.255971	0.936664	0.962885
10456	gm1.6012_g	Proteasome-domain containing protein	612	1.62379	0.21272	8.11e-105	1.08e-103	0.00076587	0.00191085	COG0638(S:Function unknown)	COG0638(ribosomal RNA processing 9, small subunit (SSU) processome component, homolog (yeast))	PF00227.26(Proteasome:Proteasome subunit)	sp|Q9P6U7|PSB4_NEUCR(Probable proteasome subunit beta type-4 OS=Neurospora crassa (strain ATCC 24698 / 74-OR23-1A / CBS 708.71 / DSM 1257 / FGSC 987) OX=367110 GN=pcb-4 PE=3 SV=2)
10558	gm1.6114_g	rab proteins geranylgeranyltransferase component A	1539	0.975113	0.376135	1.71e-20	7.17e-20	5.93568e-05	0.000170798	COG5044(O:Posttranslational modification, protein turnover, chaperones)	COG5044(GDP dissociation inhibitor)	PF00996.18(GDI:GDP dissociation inhibitor)	sp|P32864|RAEP_YEAST(Rab proteins geranylgeranyltransferase component A OS=Saccharomyces cerevisiae (strain ATCC 204508 / S288c) OX=559292 GN=MRS6 PE=1 SV=2)
10780	gm1.6336_g	TPR-like protein	4122	0.723502	-0.270907	3.11e-14	1.05e-13	2.85142e-05	8.49277e-05	COG3914(O:Posttranslational modification, protein turnover, chaperones)	COG3914(protein N-acetylglucosaminyltransferase activity)	PF13844.6(Glyco_transf_41:Glycosyl transferase family 41); PF00515.28(TPR_1:Tetratricopeptide repeat); PF07719.17(TPR_2:Tetratricopeptide repeat); PF13181.6(TPR_8:Tetratricopeptide repeat); PF13414.6(TPR_11:TPR repeat); PF13424.6(TPR_12:Tetratricopeptide repeat); PF13432.6(TPR_16:Tetratricopeptide repeat)	sp|Q9M8Y0|SEC_ARATH(Probable UDP-N-acetylglucosamine--peptide N-acetylglucosaminyltransferase SEC OS=Arabidopsis thaliana OX=3702 GN=SEC PE=1 SV=1)
10865	gm1.6421_g	glutathione S-transferase	759	5.3789	0.0583197	0	0	0.0140565	0.0281312	COG0625(S:Function unknown)	COG0625(-)	PF02798.20(GST_N:Glutathione S-transferase, N-terminal domain); PF13417.6(GST_N_3:Glutathione S-transferase, N-terminal domain); PF13409.6(GST_N_2:Glutathione S-transferase, N-terminal domain); PF00043.25(GST_C:Glutathione S-transferase, C-terminal domain); PF14497.6(GST_C_3:Glutathione S-transferase, C-terminal domain); PF13410.6(GST_C_2:Glutathione S-transferase, C-terminal domain)	sp|P77526|YFCG_ECOLI(Disulfide-bond oxidoreductase YfcG OS=Escherichia coli (strain K12) OX=83333 GN=yfcG PE=1 SV=1)
10936	gm1.6492_g	ATP-dependent Clp protease proteolytic subunit 1	540	1.08653	0.523348	3.02e-07	7.05e-07	0.000411434	0.0010689	COG0740(O:Posttranslational modification, protein turnover, chaperones)	COG0740(Cleaves peptides in various proteins in a process that requires ATP hydrolysis. Has a chymotrypsin-like activity. Plays a major role in the degradation of misfolded proteins (By similarity))	PF00574.23(CLP_protease:Clp protease)	sp|B8DNL4|CLPP_DESVM(ATP-dependent Clp protease proteolytic subunit OS=Desulfovibrio vulgaris (strain Miyazaki F / DSM 19637) OX=883 GN=clpP PE=3 SV=1)
11014	gm1.6570_g	hypothetical protein	2733	0.997334	0.478668	1.73e-29	9.33e-29	5.987e-09	2.44932e-08	COG1506(S:Function unknown)	COG1506(UPF0145 protein)	PF00930.21(DPPIV_N:Dipeptidyl peptidase IV (DPP IV) N-terminal region); PF00326.21(Peptidase_S9:Prolyl oligopeptidase family); PF12697.7(Abhydrolase_6:Alpha/beta hydrolase family)	sp|C7YYG9|DAPB_NECH7(Probable dipeptidyl-aminopeptidase B OS=Nectria haematococca (strain 77-13-4 / ATCC MYA-4622 / FGSC 9596 / MPVI) OX=660122 GN=DAPB PE=3 SV=1)
11379	gm1.6935_g	putative actin cytoskeleton organization protein	2097	1.22438	-0.237673	8.96e-15	3.09e-14	0.0288246	0.0537138	ENOG410XQNT(O:Posttranslational modification, protein turnover, chaperones)	ENOG410XQNT(Unc-45 homolog)	PF11701.8(UNC45-central:Myosin-binding striated muscle assembly central)	sp|O74994|RNG3_SCHPO(Ring assembly protein 3 OS=Schizosaccharomyces pombe (strain 972 / ATCC 24843) OX=284812 GN=rng3 PE=4 SV=1)
11480	gm1.7036_g	Endoplasmic oxidoreductin	1758	-0.982723	-0.638771	8.66e-186	1.7e-184	1.09878e-51	1.44639e-50	COG5061(O:Posttranslational modification, protein turnover, chaperones); COG5061(U:Intracellular trafficking, secretion, and vesicular transport)	COG5061(S. cerevisiae); COG5061(S. cerevisiae)	PF04137.15(ERO1:Endoplasmic Reticulum Oxidoreductin 1 (ERO1))	sp|Q7SEY9|ERO1_NEUCR(Endoplasmic reticulum oxidoreductin-1 OS=Neurospora crassa (strain ATCC 24698 / 74-OR23-1A / CBS 708.71 / DSM 1257 / FGSC 987) OX=367110 GN=ero-1 PE=3 SV=1)
11847	gm1.7403_g	hypothetical protein	2406	1.05215	0.605721	0.000415646	0.000764225	0.0503028	0.0881132	ENOG410XPXK(O:Posttranslational modification, protein turnover, chaperones)	ENOG410XPXK(anaphase promoting complex subunit 4)	PF12896.7(ANAPC4:Anaphase-promoting complex, cyclosome, subunit 4); PF12894.7(ANAPC4_WD40:Anaphase-promoting complex subunit 4 WD40 domain)	sp|O65418|APC4_ARATH(Anaphase-promoting complex subunit 4 OS=Arabidopsis thaliana OX=3702 GN=APC4 PE=2 SV=2)
12213	gm1.7769_g	mitochondrial chaperone BCS1	1425	1.70497	0.42665	4.36e-39	2.86e-38	0.00101498	0.00248417	COG0465(S:Function unknown)	COG0465((VPS9) domain protein)	PF08740.11(BCS1_N:BCS1 N terminal); PF00004.29(AAA:ATPase family associated with various cellular activities (AAA)); PF12775.7(AAA_7:P-loop containing dynein motor region)	sp|P32839|BCS1_YEAST(Mitochondrial chaperone BCS1 OS=Saccharomyces cerevisiae (strain ATCC 204508 / S288c) OX=559292 GN=BCS1 PE=1 SV=2)
12257	gm1.7813_g	dipeptidase	1383	0.0517898	-0.918195	0.615158	0.667672	2.0373e-37	2.1279e-36	COG2355(O:Posttranslational modification, protein turnover, chaperones)	COG2355(PPIases accelerate the folding of proteins (By similarity))	PF01244.21(Peptidase_M19:Membrane dipeptidase (Peptidase family M19))	sp|Q6Q886|SIRJ_LEPMC(Dipeptidase sirJ OS=Leptosphaeria maculans OX=5022 GN=sirJ PE=2 SV=1)
12362	gm1.7918_g	hsp70-like protein	2028	0.724537	-1.41497	1.26e-149	2.15e-148	0	0	COG0443(S:Function unknown)	COG0443(conserved hypothetical protein)	PF00012.20(HSP70:Hsp70 protein); PF06723.13(MreB_Mbl:MreB/Mbl protein); PF02782.16(FGGY_C:FGGY family of carbohydrate kinases, C-terminal domain)	sp|Q5B0C0|HSP7M_EMENI(Heat shock 70 kDa protein OS=Emericella nidulans (strain FGSC A4 / ATCC 38163 / CBS 112.46 / NRRL 194 / M139) OX=227321 GN=AN6010 PE=1 SV=1)
12900	gm1.8456_g	hypothetical protein	2232	0.856702	0.272717	4.61e-11	1.34e-10	0.022922	0.0438446	ENOG4111SI2(K:Transcription)	ENOG4111SI2(Glucose-responsive transcription factor that regulates expression of several glucose transporter (HXT) genes in response to glucose. In the absence of glucose, it functions as a transcriptional repressor, whereas high concentrations of glucose cause it to function as a transcriptional activator. In cells growing on low levels of glucose, has a neutral role, neither repressing nor acti…	PF00172.18(Zn_clus:Fungal Zn(2)-Cys(6) binuclear cluster domain); PF04082.18(Fungal_trans:Fungal specific transcription factor domain)	sp|O59780|YCN3_SCHPO(Uncharacterized transcriptional regulatory protein C320.03 OS=Schizosaccharomyces pombe (strain 972 / ATCC 24843) OX=284812 GN=SPCC320.03 PE=3 SV=1)
23173	estExt_Genemark1.C_1_t10213	RING-12 protein	2335	0.233325	-0.0272496	0.00101251	0.00179293	0.604728	0.688334	ENOG410Y5C6(K:Transcription)	ENOG410Y5C6(e3 ubiquitin protein ligase)	PF08647.11(BRE1:BRE1 E3 ubiquitin ligase); PF13920.6(zf-C3HC4_3:Zinc finger, C3HC4 type (RING finger)); PF00097.25(zf-C3HC4:Zinc finger, C3HC4 type (RING finger)); PF14447.6(Prok-RING_4:Prokaryotic RING finger family 4); PF13923.6(zf-C3HC4_2:Zinc finger, C3HC4 type (RING finger)); PF14634.6(zf-RING_5:zinc-RING finger domain); PF13445.6(zf-RING_UBOX:RING-type zinc-finger); PF13639.6(zf-RING_2:Ring…	sp|Q4I7N9|BRE1_GIBZE(E3 ubiquitin-protein ligase BRE1 OS=Gibberella zeae (strain PH-1 / ATCC MYA-4620 / FGSC 9075 / NRRL 31084) OX=229533 GN=BRE1 PE=3 SV=1)
23197	estExt_Genemark1.C_1_t10259	mitochondrial co-chaperone GrpE	869	1.48943	-0.253809	9.53e-65	8.84e-64	0.0084109	0.0175977	COG0576(O:Posttranslational modification, protein turnover, chaperones)	COG0576(Participates actively in the response to hyperosmotic and heat shock by preventing the aggregation of stress-denatured proteins, in association with DnaK and GrpE. It is the nucleotide exchange factor for DnaK and may function as a thermosensor. Unfolded proteins bind initially to DnaJ)	PF01025.19(GrpE:GrpE)	sp|Q9P5U4|GRPE_NEUCR(GrpE protein homolog, mitochondrial OS=Neurospora crassa (strain ATCC 24698 / 74-OR23-1A / CBS 708.71 / DSM 1257 / FGSC 987) OX=367110 GN=grpe PE=3 SV=1)
23275	estExt_Genemark1.C_1_t10414	UFD1-domain containing protein	1230	0.0614113	-0.0268387	0.33184	0.398663	0.500096	0.597918	COG5140(O:Posttranslational modification, protein turnover, chaperones)	COG5140(Ubiquitin fusion degradation protein)	PF03152.14(UFD1:Ubiquitin fusion degradation protein UFD1)	sp|P53044|UFD1_YEAST(Ubiquitin fusion degradation protein 1 OS=Saccharomyces cerevisiae (strain ATCC 204508 / S288c) OX=559292 GN=UFD1 PE=1 SV=1)
23311	estExt_Genemark1.C_1_t10489	tubulin specific chaperone cofactor B	1007	1.26599	0.142569	3.63e-34	2.19e-33	0.22032	0.313813	ENOG410YKGB(O:Posttranslational modification, protein turnover, chaperones)	ENOG410YKGB(tubulin folding cofactor B)	PF01302.25(CAP_GLY:CAP-Gly domain); PF14560.6(Ubiquitin_2:Ubiquitin-like domain); PF00240.23(ubiquitin:Ubiquitin family)	sp|Q10235|ALP11_SCHPO(Cell polarity protein alp11 OS=Schizosaccharomyces pombe (strain 972 / ATCC 24843) OX=284812 GN=alp11 PE=1 SV=1)
23367	estExt_Genemark1.C_1_t20138	ATPase	2352	-1.71663	-2.83172	4.66e-27	2.38e-26	9.83272e-57	1.37243e-55	COG0464(S:Function unknown)	COG0464(-)	PF00004.29(AAA:ATPase family associated with various cellular activities (AAA)); PF07728.14(AAA_5:AAA domain (dynein-related subfamily)); PF13401.6(AAA_22:AAA domain); PF13191.6(AAA_16:AAA ATPase domain)	sp|Q9FGM0|FTSHB_ARATH(ATP-dependent zinc metalloprotease FTSH 11, chloroplastic/mitochondrial OS=Arabidopsis thaliana OX=3702 GN=FTSH11 PE=1 SV=1)
23392	estExt_Genemark1.C_1_t20191	hypothetical protein	3419	-0.0909364	0.161695	0.0844638	0.11549	0.00076239	0.00190371	COG0790(S:Function unknown)	COG0790(TAP domain-containing protein)	PF08238.12(Sel1:Sel1 repeat)	sp|O94614|CHR4_SCHPO(Chitin synthase regulatory factor 4 OS=Schizosaccharomyces pombe (strain 972 / ATCC 24843) OX=284812 GN=chr4 PE=1 SV=4)
23456	estExt_Genemark1.C_1_t20301	Preprotein translocase Sec%2C Sec61-beta subunit	672	0.372226	1.23855	3.92e-19	1.57e-18	3.23894e-85	6.18003e-84	ENOG4111UAR(U:Intracellular trafficking, secretion, and vesicular transport)	ENOG4111UAR(protein transport protein SEC61 subunit)	PF03911.16(Sec61_beta:Sec61beta family)	sp|Q9HFC7|SC61B_YARLI(Protein transport protein Sec61 subunit beta OS=Yarrowia lipolytica (strain CLIB 122 / E 150) OX=284591 GN=SBH1 PE=3 SV=1)
23475	estExt_Genemark1.C_1_t20341	Cornichon	1184	0.759353	-0.367044	4.21e-48	3.16e-47	1.16881e-14	6.58319e-14	ENOG4111MWH(U:Intracellular trafficking, secretion, and vesicular transport)	ENOG4111MWH(cornichon homolog)	PF03311.14(Cornichon:Cornichon protein)	sp|P53173|ERV14_YEAST(ER-derived vesicles protein ERV14 OS=Saccharomyces cerevisiae (strain ATCC 204508 / S288c) OX=559292 GN=ERV14 PE=1 SV=3)
24029	estExt_Genemark1.C_3_t10290	SurE-like protein	2437	0.347853	0.144169	0.00178795	0.0030881	0.169072	0.250135	ENOG410XQDM(S:Function unknown)	ENOG410XQDM(Tubulin tyrosine ligase-like family, member)	PF03133.15(TTL:Tubulin-tyrosine ligase family); PF01975.17(SurE:Survival protein SurE); PF14398.6(ATPgrasp_YheCD:YheC/D like ATP-grasp)	sp|P38254|TTL_YEAST(Probable tubulin--tyrosine ligase PBY1 OS=Saccharomyces cerevisiae (strain ATCC 204508 / S288c) OX=559292 GN=PBY1 PE=1 SV=2)
24169	estExt_Genemark1.C_40123	thioredoxin M-type	517	2.6359	0.296388	0	0	1.2071e-18	8.00752e-18	ENOG410YQ2G(O:Posttranslational modification, protein turnover, chaperones); COG0526(O:Posttranslational modification, protein turnover, chaperones)	ENOG410YQ2G(thioredoxin-like protein); COG0526(Thioredoxin)	PF00085.20(Thioredoxin:Thioredoxin); PF04756.13(OST3_OST6:OST3 / OST6 family, transporter family); PF13899.6(Thioredoxin_7:Thioredoxin-like); PF13098.6(Thioredoxin_2:Thioredoxin-like domain); PF14595.6(Thioredoxin_9:Thioredoxin)	sp|Q9USR1|TXL1_SCHPO(Thioredoxin-like protein 1 OS=Schizosaccharomyces pombe (strain 972 / ATCC 24843) OX=284812 GN=txl1 PE=4 SV=1)
24294	estExt_Genemark1.C_40401	Defender against death DAD protein	611	1.18117	0.306054	1.57e-38	1.02e-37	0.00265596	0.00611095	ENOG4111Q2I(S:Function unknown)	ENOG4111Q2I(dolichyl-diphosphooligosaccharide-protein glycotransferase activity)	PF02109.16(DAD:DAD family)	sp|P46967|DAD1_XENLA(Dolichyl-diphosphooligosaccharide--protein glycosyltransferase subunit dad1 OS=Xenopus laevis OX=8355 GN=dad1 PE=3 SV=1)
24344	estExt_Genemark1.C_50134	putative zuotin	1367	-0.224739	-0.112718	3.55e-05	7.17e-05	0.0533494	0.0927824	COG5269(K:Transcription)	COG5269(Transcription factor)	PF16717.5(RAC_head:Ribosome-associated complex head domain); PF00226.31(DnaJ:DnaJ domain)	sp|Q9Y7I8|ZUO1_SCHPO(Zuotin OS=Schizosaccharomyces pombe (strain 972 / ATCC 24843) OX=284812 GN=zuo1 PE=1 SV=2)
24372	estExt_Genemark1.C_50200	Dolichyl-phosphate-mannose-protein mannosyltransferase-containing protein	3154	0.750759	0.727296	3.73e-101	4.81e-100	4.42652e-57	6.22538e-56	COG1928(O:Posttranslational modification, protein turnover, chaperones)	COG1928(dolichyl-phosphate-mannose-protein mannosyltransferase activity)	PF02366.18(PMT:Dolichyl-phosphate-mannose-protein mannosyltransferase); PF16192.5(PMT_4TMC:C-terminal four TMM region of protein-O-mannosyltransferase); PF02815.19(MIR:MIR domain)	sp|O74189|PMT1_CANAL(Dolichyl-phosphate-mannose--protein mannosyltransferase 1 OS=Candida albicans (strain SC5314 / ATCC MYA-2876) OX=237561 GN=PMT1 PE=2 SV=1)
24453	estExt_Genemark1.C_60028	D-site 20S pre-rRNA nuclease	1413	0.402015	0.0641994	0.00189335	0.00326148	0.586028	0.674515	COG1439(S:Function unknown)	COG1439(NIN1 RPN12 binding protein 1 homolog (S. cerevisiae))	PF08772.11(NOB1_Zn_bind:Nin one binding (NOB1) Zn-ribbon like); PF17146.4(PIN_6:PIN domain of ribonuclease)	sp|Q9UTK0|NOB1_SCHPO(20S-pre-rRNA D-site endonuclease nob1 OS=Schizosaccharomyces pombe (strain 972 / ATCC 24843) OX=284812 GN=nob1 PE=3 SV=1)
24504	estExt_Genemark1.C_60161	PARP-domain containing protein	2133	1.15674	-0.13452	1.22e-15	4.32e-15	0.40977	0.518885	ENOG410XP18(S:Function unknown)	ENOG410XP18(Poly (ADP-ribose) polymerase)	PF00644.20(PARP:Poly(ADP-ribose) polymerase catalytic domain); PF02877.14(PARP_reg:Poly(ADP-ribose) polymerase, regulatory domain); PF05406.15(WGR:WGR domain); PF00533.26(BRCT:BRCA1 C Terminus (BRCT) domain); PF12738.7(PTCB-BRCT:twin BRCT domain); PF16589.5(BRCT_2:BRCT domain, a BRCA1 C-terminus domain)	sp|Q9UGN5|PARP2_HUMAN(Poly [ADP-ribose] polymerase 2 OS=Homo sapiens OX=9606 GN=PARP2 PE=1 SV=2)
24600	estExt_Genemark1.C_60379	Acid protease	2350	-2.18163	1.60288	5.48e-165	1e-163	5.67432e-76	1.0021e-74	ENOG410XNV7(O:Posttranslational modification, protein turnover, chaperones)	ENOG410XNV7(glutathione peroxidase)	PF00026.23(Asp:Eukaryotic aspartyl protease); PF14543.6(TAXi_N:Xylanase inhibitor N-terminal)	sp|Q8NKB6|OPSB_ASPOR(Probable aspartic-type endopeptidase opsB OS=Aspergillus oryzae (strain ATCC 42149 / RIB 40) OX=510516 GN=opsB PE=2 SV=1)
24621	estExt_Genemark1.C_70013	cytochrome c heme lyase	1139	1.31232	0.0777761	4.88e-110	6.69e-109	0.234918	0.331695	ENOG410YAUW(O:Posttranslational modification, protein turnover, chaperones)	ENOG410YAUW(heme lyase)	PF01265.17(Cyto_heme_lyase:Cytochrome c/c1 heme lyase)	sp|P14187|CCHL_NEUCR(Cytochrome c heme lyase OS=Neurospora crassa (strain ATCC 24698 / 74-OR23-1A / CBS 708.71 / DSM 1257 / FGSC 987) OX=367110 GN=cyt-2 PE=3 SV=1)
24696	estExt_Genemark1.C_70192	vacuolar protease A	1247	0.816693	-0.376599	5.36e-157	9.38e-156	2.64016e-58	3.75878e-57	ENOG410XNV7(S:Function unknown)	ENOG410XNV7(Conserved hypothetical, protein)	PF00026.23(Asp:Eukaryotic aspartyl protease); PF14543.6(TAXi_N:Xylanase inhibitor N-terminal)	sp|Q01294|CARP_NEUCR(Vacuolar protease A OS=Neurospora crassa (strain ATCC 24698 / 74-OR23-1A / CBS 708.71 / DSM 1257 / FGSC 987) OX=367110 GN=pep-4 PE=3 SV=2)
24937	estExt_Genemark1.C_80244	26S proteasome subunit P45	1335	0.677978	-0.205687	1.68e-27	8.65e-27	0.00134854	0.00324393	COG1222(G:Carbohydrate transport and metabolism)	COG1222(major facilitator Superfamily)	PF00004.29(AAA:ATPase family associated with various cellular activities (AAA)); PF17862.1(AAA_lid_3:AAA+ lid domain); PF07728.14(AAA_5:AAA domain (dynein-related subfamily)); PF07724.14(AAA_2:AAA domain (Cdc48 subfamily)); PF16450.5(Prot_ATP_ID_OB:Proteasomal ATPase OB C-terminal domain); PF13191.6(AAA_16:AAA ATPase domain); PF13401.6(AAA_22:AAA domain); PF05496.12(RuvB_N:Holliday junction DNA h…	sp|P62194|PRS8_BOVIN(26S proteasome regulatory subunit 8 OS=Bos taurus OX=9913 GN=PSMC5 PE=2 SV=1)
25176	estExt_Genemark1.C_100190	Actin-like ATPase domain-containing protein	1994	-1.9285	-2.06177	8.5e-133	1.31e-131	3.80242e-234	1.90203e-232	ENOG4110098(S:Function unknown); COG0443(S:Function unknown)	ENOG4110098(Hsp70 protein); COG0443(Hsp70 protein)	PF00012.20(HSP70:Hsp70 protein)	sp|O43301|HS12A_HUMAN(Heat shock 70 kDa protein 12A OS=Homo sapiens OX=9606 GN=HSPA12A PE=1 SV=2)
25382	estExt_Genemark1.C_120044	hypothetical protein	2071	-0.359727	-0.0904235	6.29e-16	2.26e-15	0.0345646	0.0630765	ENOG410Y47J(S:Function unknown)	ENOG410Y47J(-)
25477	estExt_Genemark1.C_130024	hypothetical protein	1342	1.03647	0.607129	1.91e-25	9.22e-25	4.89594e-08	1.87065e-07	ENOG410YIYE(S:Function unknown)	ENOG410YIYE(Glutaminyl-peptide)	PF04389.17(Peptidase_M28:Peptidase family M28)	sp|Q9YIB5|QPCT_BOTJA(Glutaminyl-peptide cyclotransferase OS=Bothrops jararaca OX=8724 GN=QPCT PE=2 SV=1)
25485	estExt_Genemark1.C_130041	DnaJ-domain containing protein	1560	-0.593196	-0.411146	1.35e-25	6.55e-25	2.18978e-14	1.22221e-13	COG2214(S:Function unknown)	COG2214(Conserved hypothetical, protein)	PF14308.6(DnaJ-X:X-domain of DnaJ-containing); PF00226.31(DnaJ:DnaJ domain)	sp|O59731|YHXB_SCHPO(Uncharacterized J domain-containing protein C3E7.11c OS=Schizosaccharomyces pombe (strain 972 / ATCC 24843) OX=284812 GN=SPBC3E7.11c PE=3 SV=1)
25563	estExt_Genemark1.C_130190	P-loop containing nucleoside triphosphate hydrolase protein	1768	0.487209	-0.364322	0.00468766	0.00771767	9.20664e-05	0.000259909	COG0465(S:Function unknown)	COG0465(Cytochrome P450)	PF00004.29(AAA:ATPase family associated with various cellular activities (AAA))	sp|O34703|YJOB_BACSU(Uncharacterized ATPase YjoB OS=Bacillus subtilis (strain 168) OX=224308 GN=yjoB PE=1 SV=1)
25648	estExt_Genemark1.C_140129	Heat shock protein 70	2216	0.421129	0.492549	1.05e-269	2.65e-268	2.02756e-74	3.47464e-73	COG0443(S:Function unknown)	COG0443(Conserved hypothetical, protein)	PF00012.20(HSP70:Hsp70 protein); PF06723.13(MreB_Mbl:MreB/Mbl protein)	sp|P78695|BIP_NEUCR(Endoplasmic reticulum chaperone BiP OS=Neurospora crassa (strain ATCC 24698 / 74-OR23-1A / CBS 708.71 / DSM 1257 / FGSC 987) OX=367110 GN=grp78 PE=3 SV=3)
25669	estExt_Genemark1.C_140167	hypothetical protein	1673	-2.03398	-0.480774	0	0	2.12802e-17	1.33419e-16	ENOG410Y41C(S:Function unknown)	ENOG410Y41C(WW)	PF00656.22(Peptidase_C14:Caspase domain)	sp|Q7S232|MCA1A_NEUCR(Metacaspase-1A OS=Neurospora crassa (strain ATCC 24698 / 74-OR23-1A / CBS 708.71 / DSM 1257 / FGSC 987) OX=367110 GN=casA PE=3 SV=2)
25801	estExt_Genemark1.C_160044	putative KEX1 protein precursor	2033	1.38106	0.554858	3e-64	2.78e-63	1.97594e-12	9.94849e-12	COG2939(S:Function unknown)	COG2939(Component of the cytosolic iron-sulfur (Fe S) protein assembly machinery. Required for the maturation of extramitochondrial Fe S proteins (By similarity). Has anti- apoptotic effects in the cell. Involved in negative control of H(2)O(2)-induced cell death, probably by tethering the pro- apoptotic factor tah18 in the cytoplasm in the absence of oxidative stress (By similarity))	PF00450.22(Peptidase_S10:Serine carboxypeptidase)	sp|E9E1Z2|KEX1_METAQ(Pheromone-processing carboxypeptidase KEX1 OS=Metarhizium acridum (strain CQMa 102) OX=655827 GN=KEX1 PE=3 SV=1)
25828	estExt_Genemark1.C_160104	hypothetical protein	3565	0.734633	0.0369443	2.2e-08	5.5e-08	0.7175	0.782989	COG5160(O:Posttranslational modification, protein turnover, chaperones)	COG5160(SUMO1 sentrin specific peptidase)	PF02902.19(Peptidase_C48:Ulp1 protease family, C-terminal catalytic domain)	sp|O13769|ULP2_SCHPO(Ubiquitin-like-specific protease 2 OS=Schizosaccharomyces pombe (strain 972 / ATCC 24843) OX=284812 GN=ulp2 PE=1 SV=2)
25878	estExt_Genemark1.C_160189	protein disulfide-isomerase tigA precursor	1358	1.28963	0.552831	0	0	2.36818e-39	2.56618e-38	COG0526(J:Translation, ribosomal structure and biogenesis)	COG0526(Binds 16S rRNA, required for the assembly of 30S particles and may also be responsible for determining the conformation of the 16S rRNA at the A site (By similarity))	PF00085.20(Thioredoxin:Thioredoxin); PF07749.12(ERp29:Endoplasmic reticulum protein ERp29, C-terminal domain); PF13098.6(Thioredoxin_2:Thioredoxin-like domain); PF04756.13(OST3_OST6:OST3 / OST6 family, transporter family); PF13899.6(Thioredoxin_7:Thioredoxin-like); PF13905.6(Thioredoxin_8:Thioredoxin-like); PF00578.21(AhpC-TSA:AhpC/TSA family); PF13848.6(Thioredoxin_6:Thioredoxin-like domain); PF…	sp|Q92249|ERP38_NEUCR(Protein disulfide-isomerase erp38 OS=Neurospora crassa (strain ATCC 24698 / 74-OR23-1A / CBS 708.71 / DSM 1257 / FGSC 987) OX=367110 GN=erp38 PE=2 SV=2)
26076	estExt_Genemark1.C_190072	Subtilisin-like protein	1409	0.473371	4.26262	0.4017	0.47159	7.9744e-19	5.33587e-18	COG1404(G:Carbohydrate transport and metabolism)	COG1404(Glycoside Hydrolase Family 12)	PF00082.22(Peptidase_S8:Subtilase family); PF05922.16(Inhibitor_I9:Peptidase inhibitor I9)	sp|P29138|CUDP_METAN(Cuticle-degrading protease OS=Metarhizium anisopliae OX=5530 GN=PR1 PE=1 SV=1)
26200	estExt_Genemark1.C_210018	proteasome regulatory subunit 12	1198	1.04412	-0.032966	1.58e-42	1.1e-41	0.634138	0.714863	COG1310(U:Intracellular trafficking, secretion, and vesicular transport)	COG1310(Solute carrier family 35 member B4)	PF13012.6(MitMem_reg:Maintenance of mitochondrial structure and function); PF01398.21(JAB:JAB1/Mov34/MPN/PAD-1 ubiquitin protease)	sp|Q8WZY4|RPN8_NEUCR(26S proteasome regulatory subunit rpn-8 OS=Neurospora crassa (strain ATCC 24698 / 74-OR23-1A / CBS 708.71 / DSM 1257 / FGSC 987) OX=367110 GN=rpn-8 PE=3 SV=1)
26289	estExt_Genemark1.C_220045	hypothetical protein	764	0.427929	-0.109537	1.34e-07	3.21e-07	0.0811006	0.133376	ENOG410XS81(O:Posttranslational modification, protein turnover, chaperones)	ENOG410XS81(ubiquitin-conjugating enzyme)	PF00179.26(UQ_con:Ubiquitin-conjugating enzyme)	sp|Q6C9W0|UBC12_YARLI(NEDD8-conjugating enzyme UBC12 OS=Yarrowia lipolytica (strain CLIB 122 / E 150) OX=284591 GN=UBC12 PE=3 SV=1)
26383	estExt_Genemark1.C_230112	hypothetical protein	1395	-2.61852	-1.5325	2.32e-10	6.54e-10	0.104809	0.167283	ENOG410Y0BC(S:Function unknown)	ENOG410Y0BC(-)
26563	estExt_Genemark1.C_270064	26S protease regulatory subunit 6A	1494	1.00623	-0.0312735	3.59e-77	3.78e-76	0.486038	0.584129	COG1222(S:Function unknown)	COG1222(Meiotic sister chromatid recombination protein)	PF00004.29(AAA:ATPase family associated with various cellular activities (AAA)); PF16450.5(Prot_ATP_ID_OB:Proteasomal ATPase OB C-terminal domain); PF17862.1(AAA_lid_3:AAA+ lid domain); PF07728.14(AAA_5:AAA domain (dynein-related subfamily)); PF05496.12(RuvB_N:Holliday junction DNA helicase RuvB P-loop domain)	sp|P33297|PRS6A_YEAST(26S proteasome regulatory subunit 6A OS=Saccharomyces cerevisiae (strain ATCC 204508 / S288c) OX=559292 GN=RPT5 PE=1 SV=3)
26576	estExt_Genemark1.C_270092	HECT domain-containing protein	4190	1.17203	-0.441556	1.11e-63	1.02e-62	1.39688e-17	8.78174e-17	COG5021(S:Function unknown)	COG5021(Zinc finger protein)	PF00632.25(HECT:HECT-domain (ubiquitin-transferase)); PF16558.5(AZUL:Amino-terminal Zinc-binding domain of ubiquitin ligase E3A)	sp|O08759|UBE3A_MOUSE(Ubiquitin-protein ligase E3A OS=Mus musculus OX=10090 GN=Ube3a PE=1 SV=2)
26628	estExt_Genemark1.C_280094	putative ubiquitin hydrolase	3532	1.46193	0.0482232	1.01e-133	1.56e-132	0.267126	0.365192	COG5077(E:Amino acid transport and metabolism)	COG5077(L-asparaginase)	PF12436.8(USP7_ICP0_bdg:ICP0-binding domain of Ubiquitin-specific protease 7); PF14533.6(USP7_C2:Ubiquitin-specific protease C-terminal); PF00443.29(UCH:Ubiquitin carboxyl-terminal hydrolase); PF13423.6(UCH_1:Ubiquitin carboxyl-terminal hydrolase); PF00917.26(MATH:MATH domain)	sp|Q9UTT1|UBP21_SCHPO(Ubiquitin carboxyl-terminal hydrolase 21 OS=Schizosaccharomyces pombe (strain 972 / ATCC 24843) OX=284812 GN=ubp21 PE=3 SV=2)
26658	estExt_Genemark1.C_290023	proteasome component PUP2	764	1.56831	0.298536	5.37e-118	7.69e-117	2.09292e-08	8.21369e-08	COG0638(S:Function unknown)	COG0638(Tubulin, gamma complex associated protein 2)	PF00227.26(Proteasome:Proteasome subunit); PF10584.9(Proteasome_A_N:Proteasome subunit A N-terminal signature)	sp|P32379|PSA5_YEAST(Proteasome subunit alpha type-5 OS=Saccharomyces cerevisiae (strain ATCC 204508 / S288c) OX=559292 GN=PUP2 PE=1 SV=2)
26662	estExt_Genemark1.C_290032	Rab GTPase activator	1532	0.590997	0.610517	1.73e-38	1.12e-37	1.25028e-70	2.05508e-69	COG5044(S:Function unknown)	COG5044(Involved in the biogenesis of the 60S ribosomal subunit (By similarity))	PF00996.18(GDI:GDP dissociation inhibitor)	sp|P39958|GDI1_YEAST(Rab GDP-dissociation inhibitor OS=Saccharomyces cerevisiae (strain ATCC 204508 / S288c) OX=559292 GN=GDI1 PE=1 SV=1)
26666	estExt_Genemark1.C_290042	Thioredoxin-like protein	2634	0.632342	0.00069012	9.19e-24	4.26e-23	0.997636	0.99796	COG0526(V:Defense mechanisms)	COG0526(Mate efflux family protein)	PF00085.20(Thioredoxin:Thioredoxin); PF13905.6(Thioredoxin_8:Thioredoxin-like); PF13098.6(Thioredoxin_2:Thioredoxin-like domain)	sp|P87178|YB1D_SCHPO(Uncharacterized protein C3D6.13c OS=Schizosaccharomyces pombe (strain 972 / ATCC 24843) OX=284812 GN=SPBC3D6.13c PE=1 SV=1)
26722	estExt_Genemark1.C_300077	hypothetical protein	4931	1.60006	-0.0883751	3.09e-108	4.2e-107	0.187868	0.274	COG5219(O:Posttranslational modification, protein turnover, chaperones)	COG5219(listerin E3 ubiquitin protein ligase 1)	PF13639.6(zf-RING_2:Ring finger domain); PF11793.8(FANCL_C:FANCL C-terminal domain); PF12861.7(zf-ANAPC11:Anaphase-promoting complex subunit 11 RING-H2 finger); PF12678.7(zf-rbx1:RING-H2 zinc finger domain); PF00097.25(zf-C3HC4:Zinc finger, C3HC4 type (RING finger))	sp|O74349|LTN1_SCHPO(E3 ubiquitin-protein ligase listerin OS=Schizosaccharomyces pombe (strain 972 / ATCC 24843) OX=284812 GN=rkr1 PE=3 SV=1)
26778	estExt_Genemark1.C_320044	endoprotease	1642	-1.93457	3.94628	1.05e-15	3.74e-15	0	0	ENOG410XSGG(O:Posttranslational modification, protein turnover, chaperones)	ENOG410XSGG(protease, serine, 16 (thymus))	PF05577.12(Peptidase_S28:Serine carboxypeptidase S28)	sp|D4AYS6|A1345_ARTBC(Probable extracellular serine carboxypeptidase OS=Arthroderma benhamiae (strain ATCC MYA-4681 / CBS 112371) OX=663331 GN=ARB_01345 PE=1 SV=1)
26797	estExt_Genemark1.C_330044	proteasome component Y13	869	1.54713	0.00821537	4.54e-96	5.66e-95	0.919454	0.949412	COG0638(S:Function unknown)	COG0638(PHD finger domain protein)	PF00227.26(Proteasome:Proteasome subunit); PF10584.9(Proteasome_A_N:Proteasome subunit A N-terminal signature)	sp|Q09682|PSA3_SCHPO(Probable proteasome subunit alpha type-3 OS=Schizosaccharomyces pombe (strain 972 / ATCC 24843) OX=284812 GN=SPAC13C5.01c PE=3 SV=1)
26832	estExt_Genemark1.C_350027	Cysteine proteinase	3025	-1.28703	0.198492	2.45e-144	3.98e-143	0.000447378	0.00115418	ENOG410XP0B(F:Nucleotide transport and metabolism)	ENOG410XP0B(Catalyzes the ATP-dependent amination of UTP to CTP with either L-glutamine or ammonia as the source of nitrogen (By similarity))	PF00648.21(Peptidase_C2:Calpain family cysteine protease)	sp|Q6ZFZ4|DEK1_ORYSJ(Calpain-type cysteine protease ADL1 OS=Oryza sativa subsp. japonica OX=39947 GN=ADL1 PE=1 SV=1)
26841	estExt_Genemark1.C_350045	RING-1 like protein	1273	1.25673	0.600681	0.00130161	0.00228008	0.0345232	0.0630134	COG5574(O:Posttranslational modification, protein turnover, chaperones)	COG5574(Peroxisomal biogenesis factor 10)	PF04757.14(Pex2_Pex12:Pex2 / Pex12 amino terminal region); PF13639.6(zf-RING_2:Ring finger domain); PF13923.6(zf-C3HC4_2:Zinc finger, C3HC4 type (RING finger)); PF13920.6(zf-C3HC4_3:Zinc finger, C3HC4 type (RING finger)); PF00097.25(zf-C3HC4:Zinc finger, C3HC4 type (RING finger)); PF13445.6(zf-RING_UBOX:RING-type zinc-finger); PF14447.6(Prok-RING_4:Prokaryotic RING finger family 4); PF12678.7(zf-…	sp|Q00940|PEX10_PICAN(Peroxisome biogenesis factor 10 OS=Pichia angusta OX=870730 GN=PEX10 PE=3 SV=1)
26844	estExt_Genemark1.C_350049	putative glyoxal oxidase precursor	3819	-0.582976	0.220522	2.21e-45	1.6e-44	6.11574e-27	5.09406e-26	ENOG410XSD2(S:Function unknown)	ENOG410XSD2(G- protein-coupled receptor)	PF01822.19(WSC:WSC domain); PF07250.11(Glyoxal_oxid_N:Glyoxal oxidase N-terminus); PF09118.11(DUF1929:Domain of unknown function (DUF1929))	sp|D4AUF1|WSCD1_ARTBC(WSC domain-containing protein ARB_07867 OS=Arthroderma benhamiae (strain ATCC MYA-4681 / CBS 112371) OX=663331 GN=ARB_07867 PE=1 SV=1)
26997	estExt_Genemark1.C_430003	Ubiquitinyl hydrolase	2595	2.09873	-0.496887	2.83e-71	2.83e-70	3.92086e-08	1.50805e-07	COG5207(O:Posttranslational modification, protein turnover, chaperones)	COG5207(ubiquitin carboxyl-terminal hydrolase)	PF00443.29(UCH:Ubiquitin carboxyl-terminal hydrolase); PF17807.1(zf-UBP_var:Variant UBP zinc finger); PF02148.19(zf-UBP:Zn-finger in ubiquitin-hydrolases and other protein); PF00627.31(UBA:UBA/TS-N domain); PF13423.6(UCH_1:Ubiquitin carboxyl-terminal hydrolase)	sp|Q11119|UBP14_SCHPO(Ubiquitin carboxyl-terminal hydrolase 14 OS=Schizosaccharomyces pombe (strain 972 / ATCC 24843) OX=284812 GN=ubp14 PE=1 SV=2)
31891	fgenesh1_pg.1_#_380	hypothetical protein	1767	7.64386	-0.485427	0.131828	0.173813	0.719726	0.784216	ENOG410Z7T8(S:Function unknown)	ENOG410Z7T8(-)
32020	fgenesh1_pg.1_#_509	Zn-dependent exopeptidase	2760	0.388494	0.0158892	1.8e-07	4.25e-07	0.80042	0.850607	COG2234(S:Function unknown)	COG2234(progesterone receptor membrane component)	PF04253.15(TFR_dimer:Transferrin receptor-like dimerisation domain); PF04389.17(Peptidase_M28:Peptidase family M28); PF02225.22(PA:PA domain)	sp|Q9CZR2|NALD2_MOUSE(N-acetylated-alpha-linked acidic dipeptidase 2 OS=Mus musculus OX=10090 GN=Naalad2 PE=1 SV=2)
32083	fgenesh1_pg.1_#_572	Ubiquitin-conjugating enzyme	480	0.788197	-0.144329	0.000436182	0.00079764	0.361192	0.46958	COG5078(K:Transcription)	COG5078(DNA-dependent RNA polymerase catalyzes the transcription of DNA into RNA using the four ribonucleoside triphosphates as substrates)	PF00179.26(UQ_con:Ubiquitin-conjugating enzyme)	sp|Q9UTN8|UBC14_SCHPO(Ubiquitin-conjugating enzyme E2 14 OS=Schizosaccharomyces pombe (strain 972 / ATCC 24843) OX=284812 GN=ubc14 PE=3 SV=1)
32190	fgenesh1_pg.1_#_679	alpha/beta-Hydrolase	2064	0.619782	-0.0205809	4.42e-05	8.86e-05	0.862526	0.903943	COG0596(S:Function unknown)	COG0596(-)	PF00561.20(Abhydrolase_1:alpha/beta hydrolase fold); PF08386.10(Abhydrolase_4:TAP-like protein)	sp|P34211|YUAR_ECOLI(Putative hydrolase YuaR OS=Escherichia coli (strain K12) OX=83333 GN=yuaR PE=3 SV=3)
32415	fgenesh1_pg.1_#_904	hypothetical protein	4449	0.478591	-1.43035	0.0101162	0.015988	1.2127e-06	4.12433e-06	ENOG410YA0H(S:Function unknown)	ENOG410YA0H(NACHT and TPR)	PF17109.5(Goodbye:fungal STAND N-terminal Goodbye domain); PF00515.28(TPR_1:Tetratricopeptide repeat); PF07719.17(TPR_2:Tetratricopeptide repeat); PF13191.6(AAA_16:AAA ATPase domain); PF13424.6(TPR_12:Tetratricopeptide repeat); PF13401.6(AAA_22:AAA domain)	sp|Q00808|HETE1_PODAS(Vegetative incompatibility protein HET-E-1 OS=Podospora anserina OX=5145 GN=HET-E1 PE=4 SV=1)
32988	fgenesh1_pg.2_#_516	hypothetical protein	12054	0.724304	-0.0291815	3.17e-47	2.35e-46	0.41021	0.519371	COG5021(S:Function unknown)	COG5021(ecotropic viral integration site)	PF06012.12(DUF908:Domain of Unknown Function (DUF908)); PF06025.12(DUF913:Domain of Unknown Function (DUF913)); PF00632.25(HECT:HECT-domain (ubiquitin-transferase)); PF14377.6(UBM:Ubiquitin binding region)	sp|Q9P4Z1|TOM1_NEUCR(E3 ubiquitin-protein ligase TOM1-like OS=Neurospora crassa (strain ATCC 24698 / 74-OR23-1A / CBS 708.71 / DSM 1257 / FGSC 987) OX=367110 GN=B11B22.010 PE=3 SV=4)
33245	fgenesh1_pg.3_#_123	putative F1F0 ATP synthase assembly protein Atp10	1050	1.86052	0.401998	9.26e-42	6.35e-41	0.00383234	0.00856216	ENOG4111JYP(S:Function unknown)	ENOG4111JYP(F1F0 ATP synthase assembly protein Atp10)	PF05176.14(ATP-synt_10:ATP10 protein)	sp|Q6FWV2|ATP10_CANGA(Mitochondrial ATPase complex subunit ATP10 OS=Candida glabrata (strain ATCC 2001 / CBS 138 / JCM 3761 / NBRC 0622 / NRRL Y-65) OX=284593 GN=ATP10 PE=3 SV=1)
33306	fgenesh1_pg.3_#_184	mannosyltransferase PMTI	2322	0.599369	0.891144	3.88e-51	3.06e-50	1.10874e-45	1.32561e-44	COG1928(S:Function unknown)	COG1928(protein 2 3 complex subunit)	PF02366.18(PMT:Dolichyl-phosphate-mannose-protein mannosyltransferase); PF16192.5(PMT_4TMC:C-terminal four TMM region of protein-O-mannosyltransferase); PF02815.19(MIR:MIR domain)	sp|Q59X23|PMT4_CANAL(Dolichyl-phosphate-mannose--protein mannosyltransferase 4 OS=Candida albicans (strain SC5314 / ATCC MYA-2876) OX=237561 GN=PMT4 PE=2 SV=2)
33308	fgenesh1_pg.3_#_186	hypothetical protein	1128	0	7.84549	0.979924	0.986199	0.237432	0.333363
33817	fgenesh1_pg.4_#_164	PLP-dependent transferase	1977	0.976056	0.241983	4.32e-55	3.6e-54	9.93426e-07	3.40614e-06	COG0156(H:Coenzyme transport and metabolism)	COG0156(8-Amino-7-oxononanoate synthase)	PF00155.21(Aminotran_1_2:Aminotransferase class I and II)	sp|Q09925|LCB2_SCHPO(Serine palmitoyltransferase 2 OS=Schizosaccharomyces pombe (strain 972 / ATCC 24843) OX=284812 GN=lcb2 PE=3 SV=1)
33964	fgenesh1_pg.4_#_311	UBC-like protein	495	0.123955	0.290397	0.530522	0.587921	0.0351604	0.0639619	COG5078(S:Function unknown)	COG5078(mannan polymerase complexes MNN9 subunit)	PF00179.26(UQ_con:Ubiquitin-conjugating enzyme)	sp|Q86IZ3|UBCX_DICDI(Ubiquitin-conjugating enzyme E2 pex4 OS=Dictyostelium discoideum OX=44689 GN=pex4 PE=3 SV=1)
34235	fgenesh1_pg.5_#_174	hypothetical protein	3207	1.24454	0.168123	2.39e-12	7.39e-12	0.0854694	0.139741	ENOG410XRFI(S:Function unknown)	ENOG410XRFI(triglyceride lipase activity)	PF01764.25(Lipase_3:Lipase (class 3))	sp|Q8NCG7|DGLB_HUMAN(Sn1-specific diacylglycerol lipase beta OS=Homo sapiens OX=9606 GN=DAGLB PE=1 SV=2)
34769	fgenesh1_pg.6_#_344	DNAJ heat shock family protein	1122	-0.0768727	-1.00229	3.44e-05	6.95e-05	0	0	COG0484(O:Posttranslational modification, protein turnover, chaperones)	COG0484(ATP binding to DnaK triggers the release of the substrate protein, thus completing the reaction cycle. Several rounds of ATP-dependent interactions between DnaJ, DnaK and GrpE are required for fully efficient folding. Also involved, together with DnaK and GrpE, in the DNA replication of plasmids through activation of initiation proteins (By similarity))	PF01556.18(DnaJ_C:DnaJ C terminal domain); PF00226.31(DnaJ:DnaJ domain)	sp|Q09912|PSI1_SCHPO(Protein psi1 OS=Schizosaccharomyces pombe (strain 972 / ATCC 24843) OX=284812 GN=psi1 PE=2 SV=2)
34878	fgenesh1_pg.7_#_46	alpha/beta-Hydrolase	1584	-2.56933	-0.154865	3.09e-47	2.29e-46	0.420806	0.529959	COG2939(E:Amino acid transport and metabolism)	COG2939(carboxy-peptidase)	PF00450.22(Peptidase_S10:Serine carboxypeptidase)	sp|D4ANB6|CBPYB_ARTBC(Carboxypeptidase Y homolog ARB_05721 OS=Arthroderma benhamiae (strain ATCC MYA-4681 / CBS 112371) OX=663331 GN=ARB_05721 PE=1 SV=1)
34902	fgenesh1_pg.7_#_70	hypothetical protein	1287	-9.15482	1.03562	0.0142186	0.0220025	0.42564	0.534302	ENOG410YYX2(S:Function unknown); COG3332(S:Function unknown)	ENOG410YYX2(-); COG3332(Chromosome 22 open reading frame 25)
35762	fgenesh1_pg.9_#_283	glutathione S-transferase domain-containing protein	693	4.32487	1.08891	3.11e-112	4.32e-111	2.20686e-18	1.44531e-17	ENOG4111MKK(O:Posttranslational modification, protein turnover, chaperones)	ENOG4111MKK(glutathione Stransferase)	PF13409.6(GST_N_2:Glutathione S-transferase, N-terminal domain); PF13417.6(GST_N_3:Glutathione S-transferase, N-terminal domain); PF02798.20(GST_N:Glutathione S-transferase, N-terminal domain)	sp|P81065|GST_OCHAN(Glutathione S-transferase OS=Ochrobactrum anthropi OX=529 GN=gst PE=1 SV=2)
35892	fgenesh1_pg.10_#_121	Acid protease	1305	-1.63743	-8.17991	0.358494	0.428538	0.133743	0.204876	ENOG410XNV7(S:Function unknown)	ENOG410XNV7(Conserved hypothetical, protein)	PF00026.23(Asp:Eukaryotic aspartyl protease); PF14543.6(TAXi_N:Xylanase inhibitor N-terminal); PF14541.6(TAXi_C:Xylanase inhibitor C-terminal)	sp|P11838|CARP_CRYPA(Endothiapepsin OS=Cryphonectria parasitica OX=5116 GN=EAPA PE=1 SV=2)
36300	fgenesh1_pg.12_#_16	hypothetical protein	1878	0.213692	0.661323	0.0221198	0.0333737	5.90462e-17	3.66229e-16	ENOG41121N2(S:Function unknown)	ENOG41121N2(NIMA-interacting protein TinC)	PF13639.6(zf-RING_2:Ring finger domain); PF13923.6(zf-C3HC4_2:Zinc finger, C3HC4 type (RING finger)); PF17123.5(zf-RING_11:RING-like zinc finger); PF00097.25(zf-C3HC4:Zinc finger, C3HC4 type (RING finger)); PF13445.6(zf-RING_UBOX:RING-type zinc-finger); PF12678.7(zf-rbx1:RING-H2 zinc finger domain); PF14634.6(zf-RING_5:zinc-RING finger domain)	sp|Q1MTR5|YG66_SCHPO(Uncharacterized RING finger membrane protein C15C4.06c OS=Schizosaccharomyces pombe (strain 972 / ATCC 24843) OX=284812 GN=SPBC15C4.06c PE=4 SV=1)
36636	fgenesh1_pg.13_#_136	putative cytochrome c oxidase assembly protein	1404	2.38698	-0.802352	4.08e-234	9.4e-233	1.42181e-24	1.12169e-23	COG1612(O:Posttranslational modification, protein turnover, chaperones)	COG1612(Catalyzes the oxidation of the C8 methyl side group on heme O porphyrin ring into a formyl group (By similarity))	PF02628.15(COX15-CtaA:Cytochrome oxidase assembly protein)	sp|P40086|COX15_YEAST(Cytochrome c oxidase assembly protein COX15 OS=Saccharomyces cerevisiae (strain ATCC 204508 / S288c) OX=559292 GN=COX15 PE=3 SV=1)
36743	fgenesh1_pg.14_#_22	hypothetical protein	870	1.04704	-0.00350386	1.38e-51	1.09e-50	0.931542	0.958684	COG5148(O:Posttranslational modification, protein turnover, chaperones)	COG5148(26S proteasome nonATPase regulatory subunit)	PF13519.6(VWA_2:von Willebrand factor type A domain); PF00092.28(VWA:von Willebrand factor type A domain); PF04056.14(Ssl1:Ssl1-like)	sp|O82143|PSMDA_ORYSJ(26S proteasome non-ATPase regulatory subunit 4 homolog OS=Oryza sativa subsp. japonica OX=39947 GN=RPN10 PE=1 SV=1)
36747	fgenesh1_pg.14_#_26	hypothetical protein	831	2.50771	0.416855	0	0	9.29092e-22	6.79132e-21	ENOG41114S1(S:Function unknown); COG0330(S:Function unknown)	ENOG41114S1(Methyltransferase domain); COG0330(Methyltransferase domain)	PF01145.25(Band_7:SPFH domain / Band 7 family)	sp|P50085|PHB2_YEAST(Prohibitin-2 OS=Saccharomyces cerevisiae (strain ATCC 204508 / S288c) OX=559292 GN=PHB2 PE=1 SV=2)
36788	fgenesh1_pg.14_#_67	ubiquitin-conjugating enzyme h	558	0.364337	-0.0899294	0.0052366	0.00857035	0.327596	0.433764	ENOG410XRC5(O:Posttranslational modification, protein turnover, chaperones)	ENOG410XRC5(ubiquitin-conjugating enzyme)	PF00179.26(UQ_con:Ubiquitin-conjugating enzyme)	sp|Q9P7R4|UBC8_SCHPO(Ubiquitin-conjugating enzyme E2 8 OS=Schizosaccharomyces pombe (strain 972 / ATCC 24843) OX=284812 GN=ubc8 PE=3 SV=1)
37067	fgenesh1_pg.15_#_143	peroxisomal biogenesis factor 6	4083	1.10481	0.614033	5.41e-25	2.58e-24	6.2905e-14	3.44044e-13	ENOG410XNT9(O:Posttranslational modification, protein turnover, chaperones)	ENOG410XNT9(Peroxisomal biogenesis factor 6)	PF00004.29(AAA:ATPase family associated with various cellular activities (AAA)); PF13191.6(AAA_16:AAA ATPase domain); PF05496.12(RuvB_N:Holliday junction DNA helicase RuvB P-loop domain); PF01057.17(Parvo_NS1:Parvovirus non-structural protein NS1)	sp|Q9C1E9|PEX6_COLOR(Peroxisomal biogenesis factor 6 OS=Colletotrichum orbiculare (strain 104-T / ATCC 96160 / CBS 514.97 / LARS 414 / MAFF 240422) OX=1213857 GN=PEX6 PE=3 SV=2)
37070	fgenesh1_pg.15_#_146	putative F1F0 ATP synthase assembly protein Atp11	999	0.996163	0.308856	1.79e-18	7.01e-18	0.00627878	0.0134843	ENOG4111CKE(O:Posttranslational modification, protein turnover, chaperones)	ENOG4111CKE(ATP synthase mitochondrial F1 complex assembly factor)	PF06644.11(ATP11:ATP11 protein)	sp|P32453|ATP11_YEAST(Protein ATP11, mitochondrial OS=Saccharomyces cerevisiae (strain ATCC 204508 / S288c) OX=559292 GN=ATP11 PE=1 SV=1)
37178	fgenesh1_pg.16_#_53	vacuolar transporter chaperone 1	402	-0.625094	0.0183015	2.72e-05	5.54e-05	0.909468	0.942677	COG5264(S:Function unknown)	COG5264(Dynein light chain tctex1)	PF02656.15(DUF202:Domain of unknown function (DUF202))	sp|P40046|VTC1_YEAST(Vacuolar transporter chaperone 1 OS=Saccharomyces cerevisiae (strain ATCC 204508 / S288c) OX=559292 GN=VTC1 PE=1 SV=3)
37599	fgenesh1_pg.18_#_91	DnaJ-domain containing protein	1794	-0.343975	-0.433351	1.93e-08	4.85e-08	7.60132e-12	3.73368e-11	ENOG41123A0(O:Posttranslational modification, protein turnover, chaperones)	ENOG41123A0(DnaJ domain protein)	PF00226.31(DnaJ:DnaJ domain)	sp|P50027|DNAJH_SYNY3(DnAJ-like protein slr0093 OS=Synechocystis sp. (strain PCC 6803 / Kazusa) OX=1111708 GN=slr0093 PE=4 SV=1)
37649	fgenesh1_pg.18_#_141	hypothetical protein	705	0.505593	0.201894	0.00367948	0.00612418	0.115375	0.181424	COG5078(B:Chromatin structure and dynamics); COG5078(K:Transcription)	COG5078(Histone acetyltransferase); COG5078(Histone acetyltransferase)	PF00179.26(UQ_con:Ubiquitin-conjugating enzyme); PF09288.10(UBA_3:Fungal ubiquitin-associated domain); PF14461.6(Prok-E2_B:Prokaryotic E2 family B)	sp|P21734|UBC1_YEAST(Ubiquitin-conjugating enzyme E2 1 OS=Saccharomyces cerevisiae (strain ATCC 204508 / S288c) OX=559292 GN=UBC1 PE=1 SV=1)
37944	fgenesh1_pg.20_#_77	hypothetical protein	7884	1.28011	0.453424	5.82e-33	3.42e-32	5.56348e-13	2.90544e-12	COG5077(J:Translation, ribosomal structure and biogenesis)	COG5077(RNase P subunit Pop3)	PF12030.8(DUF3517:Domain of unknown function (DUF3517)); PF00443.29(UCH:Ubiquitin carboxyl-terminal hydrolase); PF13423.6(UCH_1:Ubiquitin carboxyl-terminal hydrolase)	sp|Q6ZQ93|UBP34_MOUSE(Ubiquitin carboxyl-terminal hydrolase 34 OS=Mus musculus OX=10090 GN=Usp34 PE=1 SV=3)
38065	fgenesh1_pg.21_#_44	AAA-domain containing protein	2268	0.947105	-0.225162	9.06e-08	2.18e-07	0.206834	0.296705	COG0464(U:Intracellular trafficking, secretion, and vesicular transport)	COG0464(Charged multivesicular body protein)	PF00004.29(AAA:ATPase family associated with various cellular activities (AAA)); PF17862.1(AAA_lid_3:AAA+ lid domain); PF13191.6(AAA_16:AAA ATPase domain); PF07728.14(AAA_5:AAA domain (dynein-related subfamily)); PF05496.12(RuvB_N:Holliday junction DNA helicase RuvB P-loop domain); PF13401.6(AAA_22:AAA domain); PF13671.6(AAA_33:AAA domain); PF07724.14(AAA_2:AAA domain (Cdc48 subfamily))	sp|O14325|YB7A_SCHPO(Uncharacterized AAA domain-containing protein C16E9.10c OS=Schizosaccharomyces pombe (strain 972 / ATCC 24843) OX=284812 GN=SPBC16E9.10c PE=1 SV=1)
39148	fgenesh1_pg.30_#_38	aspartic endopeptidase	1119	0.47468	2.27612	0.517138	0.574976	6.50802e-20	4.52481e-19	ENOG410XNV7(S:Function unknown)	ENOG410XNV7(Conserved hypothetical, protein)	PF00026.23(Asp:Eukaryotic aspartyl protease); PF14543.6(TAXi_N:Xylanase inhibitor N-terminal)	sp|Q00663|CARP_CANTR(Candidapepsin OS=Candida tropicalis OX=5482 GN=SAPT1 PE=1 SV=1)
39243	fgenesh1_pg.31_#_27	TPR-like protein	627	0.516447	0.518116	7.18e-09	1.85e-08	1.45367e-06	4.89531e-06	COG0457(S:Function unknown)	COG0457(BAG domain)	PF07719.17(TPR_2:Tetratricopeptide repeat); PF00515.28(TPR_1:Tetratricopeptide repeat); PF13424.6(TPR_12:Tetratricopeptide repeat); PF13432.6(TPR_16:Tetratricopeptide repeat); PF13181.6(TPR_8:Tetratricopeptide repeat); PF14559.6(TPR_19:Tetratricopeptide repeat)	sp|O14085|SEC72_SCHPO(Translocation protein sec72 OS=Schizosaccharomyces pombe (strain 972 / ATCC 24843) OX=284812 GN=sec72 PE=3 SV=1)
39493	fgenesh1_pg.35_#_33	Rotamase-domain containing protein	528	0.27459	0.512303	0.00190815	0.00328388	7.36584e-12	3.61994e-11	COG0760(O:Posttranslational modification, protein turnover, chaperones)	COG0760(peptidyl-prolyl cis-trans isomerase)	PF00639.21(Rotamase:PPIC-type PPIASE domain); PF13616.6(Rotamase_3:PPIC-type PPIASE domain); PF00397.26(WW:WW domain)	sp|O60045|SSP1_NEUCR(Peptidyl-prolyl cis-trans isomerase ssp-1 OS=Neurospora crassa (strain ATCC 24698 / 74-OR23-1A / CBS 708.71 / DSM 1257 / FGSC 987) OX=367110 GN=ssp-1 PE=1 SV=3)
39623	fgenesh1_pg.38_#_32	subtilase	1224	-1.43844	-0.176589	0.00329982	0.00552556	0.715026	0.780934	COG1404(C:Energy production and conversion)	COG1404(glycerol-3-phosphate dehydrogenase)	PF00082.22(Peptidase_S8:Subtilase family); PF05922.16(Inhibitor_I9:Peptidase inhibitor I9)	sp|A1CWF3|ORYZ_NEOFI(Alkaline protease 1 OS=Neosartorya fischeri (strain ATCC 1020 / DSM 3700 / CBS 544.65 / FGSC A1164 / JCM 1740 / NRRL 181 / WB 181) OX=331117 GN=alp1 PE=2 SV=1)
39912	fgenesh1_pg.48_#_15	hypothetical protein	603	-0.0657923	0.427919	0.815842	0.848223	0.321134	0.426611
41760	gw1.12.45.1	Cysteine proteinase	1896	0.665133	-0.537894	0.22759	0.286721	0.200354	0.289699	ENOG410XP0B(S:Function unknown)	ENOG410XP0B(Conserved hypothetical, protein)	PF00648.21(Peptidase_C2:Calpain family cysteine protease)	sp|Q91VA3|CAN8_MOUSE(Calpain-8 OS=Mus musculus OX=10090 GN=Capn8 PE=1 SV=1)
42179	gw1.2.170.1	P-loop containing nucleoside triphosphate hydrolase protein	2097	-0.247928	-0.914139	0.28815	0.350939	0.00144174	0.00345286	ENOG4110D4H(O:Posttranslational modification, protein turnover, chaperones); ENOG410XYIN(O:Posttranslational modification, protein turnover, chaperones)	ENOG4110D4H(ATPase family associated with various cellular activities (AAA)); ENOG410XYIN(ATPase family associated with various cellular activities (AAA))	PF00004.29(AAA:ATPase family associated with various cellular activities (AAA)); PF13401.6(AAA_22:AAA domain); PF13191.6(AAA_16:AAA ATPase domain)	sp|Q9VEX6|ATD3A_DROME(ATPase family AAA domain-containing protein 3A homolog OS=Drosophila melanogaster OX=7227 GN=bor PE=1 SV=2)
44945	gw1.12.149.1	Cysteine proteinase	2988	-0.470166	-0.462884	5.31e-09	1.38e-08	1.15004e-07	4.29303e-07	ENOG410XP8T(O:Posttranslational modification, protein turnover, chaperones)	ENOG410XP8T(ubiquitin carboxyl-terminal hydrolase)	PF00443.29(UCH:Ubiquitin carboxyl-terminal hydrolase); PF13423.6(UCH_1:Ubiquitin carboxyl-terminal hydrolase); PF00581.20(Rhodanese:Rhodanese-like domain)	sp|Q9HFS7|UBP4_KLULA(Ubiquitin carboxyl-terminal hydrolase 4 OS=Kluyveromyces lactis (strain ATCC 8585 / CBS 2359 / DSM 70799 / NBRC 1267 / NRRL Y-1140 / WM37) OX=284590 GN=DOA4 PE=3 SV=1)
45604	gw1.3.336.1	hypothetical protein	1257	0.587437	-0.896381	0.00147152	0.0025644	1.69687e-14	9.51689e-14	ENOG410YJY9(S:Function unknown)	ENOG410YJY9(-)	PF08693.10(SKG6:Transmembrane alpha-helix domain)
45640	gw1.3.339.1	hypothetical protein	561	-1.03148	10.9658	0.322232	0.387989	0.00334628	0.00753993	COG0464(K:Transcription)	COG0464(Zinc finger transcription factor)	PF00004.29(AAA:ATPase family associated with various cellular activities (AAA))	sp|P27643|SP5K_BACSU(Stage V sporulation protein K OS=Bacillus subtilis (strain 168) OX=224308 GN=spoVK PE=2 SV=3)
45881	gw1.19.129.1	Erv1/Alr family protein	540	-1.29092	-0.768956	1.61e-90	1.91e-89	5.19864e-29	4.5428e-28	COG5054(S:Function unknown)	COG5054(mucin family signaling protein Msb2)	PF04777.13(Evr1_Alr:Erv1 / Alr family)	sp|Q12284|ERV2_YEAST(FAD-linked sulfhydryl oxidase ERV2 OS=Saccharomyces cerevisiae (strain ATCC 204508 / S288c) OX=559292 GN=ERV2 PE=1 SV=1)
46131	gw1.7.295.1	hypothetical protein	723	-0.0651039	-0.621464	0.686532	0.731894	1.483e-05	4.55938e-05	ENOG4111XBC(O:Posttranslational modification, protein turnover, chaperones)	ENOG4111XBC(Hsp40 co-chaperone Jid1)	PF00226.31(DnaJ:DnaJ domain); PF10500.9(SR-25:Nuclear RNA-splicing-associated protein)	sp|Q75BG6|JID1_ASHGO(J domain-containing protein 1 OS=Ashbya gossypii (strain ATCC 10895 / CBS 109.51 / FGSC 9923 / NRRL Y-1056) OX=284811 GN=JID1 PE=3 SV=1)
50702	gw1.7.501.1	hypothetical protein	1206	0.989804	0.376394	0.0024321	0.00412714	0.14889	0.224329	ENOG4111YKW(S:Function unknown)	ENOG4111YKW(Conserved hypothetical, protein)	PF13324.6(GCIP:Grap2 and cyclin-D-interacting)
50927	gw1.6.545.1	P-loop containing nucleoside triphosphate hydrolase protein	1674	-1.89308	-0.255257	0.00542888	0.008858	0.70255	0.771496	COG0465(O:Posttranslational modification, protein turnover, chaperones)	COG0465(Acts as a processive, ATP-dependent zinc metallopeptidase for both cytoplasmic and membrane proteins. Plays a role in the quality control of integral membrane proteins (By similarity))	PF08740.11(BCS1_N:BCS1 N terminal); PF00004.29(AAA:ATPase family associated with various cellular activities (AAA))	sp|Q5E9H5|BCS1_BOVIN(Mitochondrial chaperone BCS1 OS=Bos taurus OX=9913 GN=BCS1L PE=2 SV=1)
50936	gw1.4.525.1	Diphthamide biosynthesis protein 4	549	0.823749	0.652237	0.0354436	0.0516801	0.0438424	0.0779926	COG2214(T:Signal transduction mechanisms); COG0484(T:Signal transduction mechanisms)	COG2214(Tyrosine 3-monooxygenase tryptophan 5-monooxygenase activation protein); COG0484(Tyrosine 3-monooxygenase tryptophan 5-monooxygenase activation protein)	PF05207.13(zf-CSL:CSL zinc finger); PF00226.31(DnaJ:DnaJ domain)	sp|Q4I7G0|DPH4_GIBZE(Diphthamide biosynthesis protein 4 OS=Gibberella zeae (strain PH-1 / ATCC MYA-4620 / FGSC 9075 / NRRL 31084) OX=229533 GN=DPH4 PE=3 SV=2)
51151	gw1.6.559.1	Cysteine proteinase	1923	0.017255	0.0331083	0.912332	0.936579	0.7969	0.847353	ENOG410XQQ0(O:Posttranslational modification, protein turnover, chaperones)	ENOG410XQQ0(ubiquitin carboxyl-terminal hydrolase)	PF00443.29(UCH:Ubiquitin carboxyl-terminal hydrolase); PF13423.6(UCH_1:Ubiquitin carboxyl-terminal hydrolase)	sp|P25037|UBP1_YEAST(Ubiquitin carboxyl-terminal hydrolase 1 OS=Saccharomyces cerevisiae (strain ATCC 204508 / S288c) OX=559292 GN=UBP1 PE=1 SV=2)
52849	gw1.24.219.1	hypothetical protein	153	-0.596935	2.06244	0.662576	0.709925	0.203176	0.292682	ENOG410Z5DF(S:Function unknown)	ENOG410Z5DF(-)	PF13639.6(zf-RING_2:Ring finger domain); PF17123.5(zf-RING_11:RING-like zinc finger); PF00097.25(zf-C3HC4:Zinc finger, C3HC4 type (RING finger)); PF14634.6(zf-RING_5:zinc-RING finger domain); PF13923.6(zf-C3HC4_2:Zinc finger, C3HC4 type (RING finger)); PF12678.7(zf-rbx1:RING-H2 zinc finger domain); PF13445.6(zf-RING_UBOX:RING-type zinc-finger); PF14447.6(Prok-RING_4:Prokaryotic RING finger family…	sp|Q8TEB7|RN128_HUMAN(E3 ubiquitin-protein ligase RNF128 OS=Homo sapiens OX=9606 GN=RNF128 PE=1 SV=1)
54009	gw1.30.179.1	hypothetical protein	666	0.0303736	0.901085	0.95542	0.973902	0.0114044	0.0233229	ENOG410Z7XV(S:Function unknown)	ENOG410Z7XV(-)	PF08693.10(SKG6:Transmembrane alpha-helix domain); PF05808.11(Podoplanin:Podoplanin); PF04478.12(Mid2:Mid2 like cell wall stress sensor)
54403	gw1.1.1645.1	hypothetical protein	2334	-1.06861	0.855333	2.09e-16	7.63e-16	8.42362e-11	3.91326e-10	ENOG410XPSJ(S:Function unknown)	ENOG410XPSJ(Conserved hypothetical, protein)
55109	gw1.12.387.1	Acid protease	1245	-1.75673	-0.740613	0.0511306	0.0725571	0.111096	0.176192	ENOG410Y9NG(S:Function unknown)	ENOG410Y9NG(Eukaryotic aspartyl protease)	PF00026.23(Asp:Eukaryotic aspartyl protease)	sp|P32329|YPS1_YEAST(Aspartic proteinase 3 OS=Saccharomyces cerevisiae (strain ATCC 204508 / S288c) OX=559292 GN=YPS1 PE=1 SV=2)
55114	gw1.24.252.1	P-loop containing nucleoside triphosphate hydrolase protein	2484	0.326764	0.203062	0.114088	0.153147	0.080118	0.131924	ENOG4110SBZ(O:Posttranslational modification, protein turnover, chaperones); ENOG410YFWQ(O:Posttranslational modification, protein turnover, chaperones)	ENOG4110SBZ(ATPase family associated with various cellular activities (AAA)); ENOG410YFWQ(ATPase family associated with various cellular activities (AAA))	PF00004.29(AAA:ATPase family associated with various cellular activities (AAA))	sp|Q5T9A4|ATD3B_HUMAN(ATPase family AAA domain-containing protein 3B OS=Homo sapiens OX=9606 GN=ATAD3B PE=1 SV=1)
56477	gw1.14.401.1	APG12-domain containing protein	381	1.84653	0.0528064	0.0398622	0.0576525	0.931396	0.958747	ENOG4111ND7(U:Intracellular trafficking, secretion, and vesicular transport)	ENOG4111ND7(Ubiquitin-like protein involved in cytoplasm to vacuole transport (Cvt), autophagy vesicles formation, mitophagy, and nucleophagy. Conjugation with atg5 through an ubiquitin-like conjugating system involving also atg7 as an E1-like activating enzyme and atg10 as an E2-like conjugating enzyme, is essential for its function. The atg12-atg5 conjugate functions as an E3-like enzyme which …	PF04110.13(APG12:Ubiquitin-like autophagy protein Apg12)	sp|A0A0E0SC50|ATG12_GIBZE(Ubiquitin-like protein ATG12 OS=Gibberella zeae (strain PH-1 / ATCC MYA-4620 / FGSC 9075 / NRRL 31084) OX=229533 GN=ATG12 PE=3 SV=1)
57582	gw1.19.403.1	homoserine O-acetyltransferase	1515	2.40218	0.0320217	6.24e-91	7.48e-90	0.811206	0.859995	COG2021(S:Function unknown)	COG2021(-)	PF00561.20(Abhydrolase_1:alpha/beta hydrolase fold); PF00756.20(Esterase:Putative esterase)	sp|A0A1D3PCM3|SST_EMEND(Serine O-succinyltransferase OS=Emericella nidulans OX=162425 GN=CysA PE=1 SV=1)
58027	gw1.18.395.1	hypothetical protein	543	0.0283143	-0.444611	0.959426	0.977112	0.139445	0.211822
58189	gw1.22.308.1	hypothetical protein	1041	1.34618	-0.479993	0.0723362	0.0998511	0.452936	0.561784	ENOG410XS1H(S:Function unknown); ENOG4111H21(S:Function unknown)	ENOG410XS1H(-); ENOG4111H21(-)	PF01485.21(IBR:IBR domain, a half RING-finger domain)	sp|Q9US46|ITT1_SCHPO(E3 ubiquitin-protein ligase itt1 OS=Schizosaccharomyces pombe (strain 972 / ATCC 24843) OX=284812 GN=itt1 PE=3 SV=1)
58603	gw1.4.916.1	hypothetical protein	1242	0.357673	0.729158	6.26e-09	1.62e-08	3.4171e-17	2.13373e-16	COG2214(O:Posttranslational modification, protein turnover, chaperones)	COG2214(DNAj domain protein)	PF00226.31(DnaJ:DnaJ domain)	sp|Q9P7C1|YKU3_SCHPO(Uncharacterized J domain-containing protein C2E1P5.03 OS=Schizosaccharomyces pombe (strain 972 / ATCC 24843) OX=284812 GN=SPAC2E1P5.03 PE=3 SV=1)
61623	gw1.1.2423.1	hypothetical protein	1254	-0.24536	-1.3859	0.143906	0.187783	5.37488e-19	3.63059e-18	ENOG410XYPR(S:Function unknown)	ENOG410XYPR(Protein of unknown function (DUF1762))	PF08574.10(Iwr1:Transcription factor Iwr1)
61673	gw1.1.2428.1	hypothetical protein	396	0.79468	0.745722	1.21e-22	5.42e-22	4.24994e-10	1.87192e-09	COG0545(S:Function unknown)	COG0545(RPEL repeat protein)	PF00254.28(FKBP_C:FKBP-type peptidyl-prolyl cis-trans isomerase)	sp|O60046|FKBP2_NEUCR(FK506-binding protein 2 OS=Neurospora crassa (strain ATCC 24698 / 74-OR23-1A / CBS 708.71 / DSM 1257 / FGSC 987) OX=367110 GN=fkr-5 PE=1 SV=1)
61684	gw1.10.632.1	Galactose-binding like protein	447	1.09908	-0.384414	0.00313438	0.00525722	0.237678	0.332096	COG5156(D:Cell cycle control, cell division, chromosome partitioning); COG5156(O:Posttranslational modification, protein turnover, chaperones)	COG5156(complex subunit 10); COG5156(complex subunit 10)	PF03256.16(ANAPC10:Anaphase-promoting complex, subunit 10 (APC10))	sp|Q9ZPW2|APC10_ARATH(Anaphase-promoting complex subunit 10 OS=Arabidopsis thaliana OX=3702 GN=APC10 PE=1 SV=2)
61763	gw1.9.719.1	hypothetical protein	2673	-0.494765	1.14839	0.54787	0.604062	0.0144683	0.0288866	COG0775(F:Nucleotide transport and metabolism); COG0666(S:Function unknown)	COG0775(Catalyzes the irreversible cleavage of the glycosidic bond in both 5'-methylthioadenosine (MTA) and S- adenosylhomocysteine (SAH AdoHcy) to adenine and the corresponding thioribose, 5'-methylthioribose and S-ribosylhomocysteine, respectively (By similarity)); COG0666(Ankyrin Repeat)	PF12796.7(Ank_2:Ankyrin repeats (3 copies)); PF00023.30(Ank:Ankyrin repeat); PF13606.6(Ank_3:Ankyrin repeat); PF05729.12(NACHT:NACHT domain); PF13637.6(Ank_4:Ankyrin repeats (many copies)); PF13191.6(AAA_16:AAA ATPase domain); PF01048.20(PNP_UDP_1:Phosphorylase superfamily); PF13401.6(AAA_22:AAA domain)
62230	gw1.13.575.1	DnaJ domain-containing protein	864	-0.015825	-0.486283	0.9316	0.95346	0.0395656	0.0711228	COG2214(S:Function unknown)	COG2214(-)	PF00226.31(DnaJ:DnaJ domain)	sp|Q9UTQ5|YL39_SCHPO(Uncharacterized J domain-containing protein C1071.09c OS=Schizosaccharomyces pombe (strain 972 / ATCC 24843) OX=284812 GN=SPAC1071.09c PE=3 SV=1)
63819	gw1.4.1143.1	3ank: A designed ankyrin repeat protein with three identical consensus repeats	264	-1.61891	0.054743	0.358494	0.427977	0.962724	0.978694	COG0666(S:Function unknown)	COG0666(-)	PF13637.6(Ank_4:Ankyrin repeats (many copies)); PF13857.6(Ank_5:Ankyrin repeats (many copies)); PF12796.7(Ank_2:Ankyrin repeats (3 copies)); PF00023.30(Ank:Ankyrin repeat); PF13606.6(Ank_3:Ankyrin repeat)
65989	gw1.25.299.1	Prefoldin	264	-0.120763	0.210873	0.500064	0.56727	0.334796	0.441654	COG1382(I:Lipid transport and metabolism)	COG1382(fatty acid oxygenase)	PF01920.20(Prefoldin_2:Prefoldin subunit)	sp|P52553|PFD6_YEAST(Prefoldin subunit 6 OS=Saccharomyces cerevisiae (strain ATCC 204508 / S288c) OX=559292 GN=YKE2 PE=1 SV=1)
66247	gw1.3.1616.1	Co-chaperone Hsc20	576	1.151	0.236107	2.06e-06	4.55e-06	0.26813	0.365754	COG1076(O:Posttranslational modification, protein turnover, chaperones)	COG1076(protein oligomerization)	PF07743.13(HSCB_C:HSCB C-terminal oligomerisation domain); PF00226.31(DnaJ:DnaJ domain)	sp|P53193|JAC1_YEAST(J-type co-chaperone JAC1, mitochondrial OS=Saccharomyces cerevisiae (strain ATCC 204508 / S288c) OX=559292 GN=JAC1 PE=1 SV=1)
66489	gw1.21.447.1	RING-15 protein	1845	1.22421	0.187358	3.11e-33	1.84e-32	0.0161077	0.0318505	ENOG410XTFS(O:Posttranslational modification, protein turnover, chaperones)	ENOG410XTFS(Ring finger protein)	PF00097.25(zf-C3HC4:Zinc finger, C3HC4 type (RING finger)); PF13445.6(zf-RING_UBOX:RING-type zinc-finger); PF13920.6(zf-C3HC4_3:Zinc finger, C3HC4 type (RING finger)); PF13639.6(zf-RING_2:Ring finger domain); PF14634.6(zf-RING_5:zinc-RING finger domain); PF13923.6(zf-C3HC4_2:Zinc finger, C3HC4 type (RING finger)); PF15227.6(zf-C3HC4_4:zinc finger of C3HC4-type, RING)	sp|O94271|YORN_SCHPO(Uncharacterized RING finger protein P8B7.23 OS=Schizosaccharomyces pombe (strain 972 / ATCC 24843) OX=284812 GN=SPBP8B7.23 PE=4 SV=1)
67494	e_gw1.1.2229.1	RWD-domain containing protein	1401	-0.68945	-0.776035	3.39e-08	8.37e-08	4.80666e-07	1.69064e-06	ENOG410Y5R1(S:Function unknown)	ENOG410Y5R1(Ring finger protein)	PF01485.21(IBR:IBR domain, a half RING-finger domain); PF05773.22(RWD:RWD domain); PF13639.6(zf-RING_2:Ring finger domain); PF13445.6(zf-RING_UBOX:RING-type zinc-finger)	sp|Q9US46|ITT1_SCHPO(E3 ubiquitin-protein ligase itt1 OS=Schizosaccharomyces pombe (strain 972 / ATCC 24843) OX=284812 GN=itt1 PE=3 SV=1)
67715	e_gw1.1.622.1	putative GPI transamidase component PIG-S	1623	1.16103	0.00802986	2.04e-30	1.13e-29	0.951456	0.972903	ENOG410XR9U(S:Function unknown)	ENOG410XR9U(phosphatidylinositol glycan anchor biosynthesis, class S)	PF10510.9(PIG-S:Phosphatidylinositol-glycan biosynthesis class S protein)	sp|Q04080|GPI17_YEAST(GPI transamidase component GPI17 OS=Saccharomyces cerevisiae (strain ATCC 204508 / S288c) OX=559292 GN=GPI17 PE=1 SV=1)
67805	e_gw1.1.975.1	hypothetical protein	2067	0.453634	2.95515	0.00098675	0.00175004	1.97831e-188	8.06488e-187
67968	e_gw1.1.122.1	hypothetical protein	1551	-1.3	0.445969	4.38e-46	3.19e-45	9.0462e-06	2.85517e-05	ENOG41121N2(S:Function unknown)	ENOG41121N2(conserved hypothetical protein)	PF13639.6(zf-RING_2:Ring finger domain); PF17123.5(zf-RING_11:RING-like zinc finger); PF13923.6(zf-C3HC4_2:Zinc finger, C3HC4 type (RING finger)); PF12678.7(zf-rbx1:RING-H2 zinc finger domain); PF00097.25(zf-C3HC4:Zinc finger, C3HC4 type (RING finger)); PF14634.6(zf-RING_5:zinc-RING finger domain); PF14447.6(Prok-RING_4:Prokaryotic RING finger family 4)	sp|Q69U49|RMR2_ORYSJ(Receptor homology region, transmembrane domain- and RING domain-containing protein 2 OS=Oryza sativa subsp. japonica OX=39947 GN=RMR1 PE=2 SV=2)
68035	e_gw1.1.264.1	hypothetical protein	2580	0.391308	0.0671979	0.000801984	0.00143182	0.466588	0.575554	ENOG4111UNJ(S:Function unknown)	ENOG4111UNJ(Conserved hypothetical, protein)	PF08728.10(CRT10:CRT10)
68562	e_gw1.1.2734.1	hypothetical protein	540	1.45508	0.665523	7.43e-12	2.24e-11	1.175e-07	4.38091e-07	ENOG4111IGV(O:Posttranslational modification, protein turnover, chaperones)	ENOG4111IGV(ubiquitin-conjugating enzyme)	PF00179.26(UQ_con:Ubiquitin-conjugating enzyme); PF14461.6(Prok-E2_B:Prokaryotic E2 family B)	sp|O00103|UBC11_SCHPO(Ubiquitin-conjugating enzyme E2-20 kDa OS=Schizosaccharomyces pombe (strain 972 / ATCC 24843) OX=284812 GN=ubc11 PE=3 SV=1)
68617	e_gw1.1.1971.1	hypothetical protein	879	-0.102334	-1.70411	0.590782	0.646294	1.44153e-31	1.34339e-30	ENOG410YVP0(S:Function unknown)	ENOG410YVP0(CFEM domain protein)	PF05730.11(CFEM:CFEM domain)	sp|Q4WLB9|CFMA_ASPFU(GPI-anchored CFEM domain protein A OS=Neosartorya fumigata (strain ATCC MYA-4609 / Af293 / CBS 101355 / FGSC A1100) OX=330879 GN=cfmA PE=1 SV=1)
68766	e_gw1.1.1929.1	hypothetical protein	804	1.35445	-2.75406	1.18e-33	7.05e-33	1.84071e-74	3.16616e-73
68768	e_gw1.1.1702.1	anaphase-promoting complex subunit 11	294	0.374573	0.235536	0.155341	0.20175	0.437068	0.545539	COG5194(S:Function unknown)	COG5194(-)	PF12861.7(zf-ANAPC11:Anaphase-promoting complex subunit 11 RING-H2 finger); PF12678.7(zf-rbx1:RING-H2 zinc finger domain); PF13639.6(zf-RING_2:Ring finger domain); PF13445.6(zf-RING_UBOX:RING-type zinc-finger); PF00097.25(zf-C3HC4:Zinc finger, C3HC4 type (RING finger)); PF13920.6(zf-C3HC4_3:Zinc finger, C3HC4 type (RING finger)); PF14570.6(zf-RING_4:RING/Ubox like zinc-binding domain)	sp|Q9M9L0|APC11_ARATH(Anaphase-promoting complex subunit 11 OS=Arabidopsis thaliana OX=3702 GN=APC11 PE=1 SV=3)
68815	e_gw1.1.2344.1	WSC-domain containing protein	1635	0.664251	-0.311461	0.149574	0.194733	0.461154	0.570143	ENOG410Y9PD(S:Function unknown)	ENOG410Y9PD(Domain of unknown function (DUF1996))	PF09362.10(DUF1996:Domain of unknown function (DUF1996)); PF01822.19(WSC:WSC domain)	sp|D4AUF1|WSCD1_ARTBC(WSC domain-containing protein ARB_07867 OS=Arthroderma benhamiae (strain ATCC MYA-4681 / CBS 112371) OX=663331 GN=ARB_07867 PE=1 SV=1)
68836	e_gw1.1.1493.1	HECT-domain containing protein	3633	0.542181	0.50953	0.000125536	0.000241482	2.14092e-05	6.47877e-05	COG5021(S:Function unknown)	COG5021(50S ribosomal protein Mrp49)	PF00632.25(HECT:HECT-domain (ubiquitin-transferase))	sp|O94275|MUG30_SCHPO(Probable E3 ubiquitin-protein ligase mug30 OS=Schizosaccharomyces pombe (strain 972 / ATCC 24843) OX=284812 GN=mug30 PE=1 SV=1)
68919	e_gw1.1.1685.1	methionine aminopeptidase	1206	0.327618	-0.237428	0.000126345	0.000242988	0.00311286	0.00706212	COG0024(U:Intracellular trafficking, secretion, and vesicular transport)	COG0024(cornichon homolog)	PF00557.24(Peptidase_M24:Metallopeptidase family M24); PF15801.5(zf-C6H2:zf-MYND-like zinc finger, mRNA-binding); PF01753.18(zf-MYND:MYND finger)	sp|O59730|MAP1_SCHPO(Methionine aminopeptidase 1 OS=Schizosaccharomyces pombe (strain 972 / ATCC 24843) OX=284812 GN=fma1 PE=1 SV=1)
69459	e_gw1.1.1078.1	alpha/beta-Hydrolase	1947	0.555215	1.47045	0.417976	0.489312	0.000926316	0.00228347	COG1506(S:Function unknown)	COG1506(-)	PF00326.21(Peptidase_S9:Prolyl oligopeptidase family); PF08840.11(BAAT_C:BAAT / Acyl-CoA thioester hydrolase C terminal); PF12146.8(Hydrolase_4:Serine aminopeptidase, S33); PF01738.18(DLH:Dienelactone hydrolase family); PF00561.20(Abhydrolase_1:alpha/beta hydrolase fold); PF08386.10(Abhydrolase_4:TAP-like protein)	sp|V5YMB3|DAPB3_PSEMX(Dipeptidyl aminopeptidase BIII OS=Pseudoxanthomonas mexicana OX=128785 GN=dapb3 PE=1 SV=1)
69546	e_gw1.1.162.1	peptidylprolyl isomerase A precursor%2C mitochondrial cyclosporin fungus	684	-0.0922335	-0.426052	3.75e-05	7.56e-05	4.46224e-97	9.34244e-96	COG0652(S:Function unknown)	COG0652(Conserved hypothetical, protein)	PF00160.21(Pro_isomerase:Cyclophilin type peptidyl-prolyl cis-trans isomerase/CLD)	sp|P10255|CYPH_NEUCR(Peptidyl-prolyl cis-trans isomerase, mitochondrial OS=Neurospora crassa (strain ATCC 24698 / 74-OR23-1A / CBS 708.71 / DSM 1257 / FGSC 987) OX=367110 GN=csr-1 PE=1 SV=1)
69721	e_gw1.1.1243.1	hypothetical protein	186	2.8523	0.274404	2.84e-23	1.3e-22	0.315748	0.420967	ENOG410ZIQR(O:Posttranslational modification, protein turnover, chaperones)	ENOG410ZIQR(cytochrome C oxidase)	PF05051.13(COX17:Cytochrome C oxidase copper chaperone (COX17))	sp|Q12287|COX17_YEAST(Cytochrome c oxidase copper chaperone OS=Saccharomyces cerevisiae (strain ATCC 204508 / S288c) OX=559292 GN=COX17 PE=1 SV=3)
70110	e_gw1.1.532.1	RNA recognition domain-containing protein	444	0.951049	0.0947664	0.000571758	0.00103642	0.710892	0.778072	COG0652(S:Function unknown)	COG0652(-)	PF00076.22(RRM_1:RNA recognition motif. (a.k.a. RRM, RBD, or RNP domain)); PF16367.5(RRM_7:RNA recognition motif)	sp|Q9V3G3|PPIE_DROME(Peptidyl-prolyl cis-trans isomerase E OS=Drosophila melanogaster OX=7227 GN=cyp33 PE=1 SV=1)
70115	e_gw1.1.341.1	DHYS_NEUCR Deoxyhypusine synthase	1065	1.04483	0.622465	9.8e-06	2.07e-05	0.00390762	0.00871772	COG1899(O:Posttranslational modification, protein turnover, chaperones)	COG1899(deoxyhypusine synthase)	PF01916.17(DS:Deoxyhypusine synthase)	sp|P49365|DHYS_NEUCR(Deoxyhypusine synthase OS=Neurospora crassa (strain ATCC 24698 / 74-OR23-1A / CBS 708.71 / DSM 1257 / FGSC 987) OX=367110 GN=dys-1 PE=1 SV=2)
70238	e_gw1.1.2221.1	hypothetical protein	1881	0.212563	0.0425291	0.169043	0.217809	0.768706	0.826203	ENOG410XQB4(O:Posttranslational modification, protein turnover, chaperones)	ENOG410XQB4(peptidylprolyl isomerase domain and WD)	PF00160.21(Pro_isomerase:Cyclophilin type peptidyl-prolyl cis-trans isomerase/CLD); PF00400.32(WD40:WD domain, G-beta repeat); PF12894.7(ANAPC4_WD40:Anaphase-promoting complex subunit 4 WD40 domain)	sp|P0C1J0|CYP15_RHIO9(Peptidyl-prolyl cis-trans isomerase cyp15 OS=Rhizopus delemar (strain RA 99-880 / ATCC MYA-4621 / FGSC 9543 / NRRL 43880) OX=246409 GN=cyp15 PE=3 SV=1)
70313	e_gw1.2.1011.1	Cysteine proteinase	1803	2.28428	0.666454	8.66e-41	5.86e-40	1.85606e-08	7.31517e-08	ENOG410ZFKJ(O:Posttranslational modification, protein turnover, chaperones)	ENOG410ZFKJ(ubiquitin carboxyl-terminal hydrolase)	PF00443.29(UCH:Ubiquitin carboxyl-terminal hydrolase); PF13423.6(UCH_1:Ubiquitin carboxyl-terminal hydrolase)	sp|P0CAQ1|UBP16_EMENI(Ubiquitin carboxyl-terminal hydrolase 16 OS=Emericella nidulans (strain FGSC A4 / ATCC 38163 / CBS 112.46 / NRRL 194 / M139) OX=227321 GN=ubp16 PE=3 SV=1)
70331	e_gw1.2.540.1	hypothetical protein	1371	-1.66774	0.123449	2.02e-45	1.47e-44	0.258734	0.356936	ENOG410ZI9A(S:Function unknown)	ENOG410ZI9A(SUN domain protein (Adg3))	PF03856.13(SUN:Beta-glucosidase (SUN family))	sp|O74851|ADG3_SCHPO(Probable secreted beta-glucosidase adg3 OS=Schizosaccharomyces pombe (strain 972 / ATCC 24843) OX=284812 GN=adg3 PE=2 SV=1)
70404	e_gw1.2.304.1	hypothetical protein	852	-0.221401	-0.565752	0.541814	0.598688	0.083993	0.137497	COG2214(S:Function unknown)	COG2214(Folate-binding protein involved in regulating the level of ATP-DnaA and in the modification of some tRNAs. It is probably a key factor in regulatory networks that act via tRNA modification, such as initiation of chromosomal replication (By similarity))	PF00226.31(DnaJ:DnaJ domain)	sp|Q9P7C6|CWC23_SCHPO(Pre-mRNA-splicing factor cwf23 OS=Schizosaccharomyces pombe (strain 972 / ATCC 24843) OX=284812 GN=cwf23 PE=1 SV=2)
70806	e_gw1.2.1902.1	AAA-domain containing protein	4896	0.687009	-0.0876568	2.04e-15	7.19e-15	0.198732	0.287534	COG0464(Q:Secondary metabolites biosynthesis, transport and catabolism)	COG0464(dsbA oxidoreductase)	PF00004.29(AAA:ATPase family associated with various cellular activities (AAA)); PF17862.1(AAA_lid_3:AAA+ lid domain); PF13191.6(AAA_16:AAA ATPase domain); PF01695.17(IstB_IS21:IstB-like ATP binding protein); PF07724.14(AAA_2:AAA domain (Cdc48 subfamily))	sp|P40340|TBP7_YEAST(Tat-binding homolog 7 OS=Saccharomyces cerevisiae (strain ATCC 204508 / S288c) OX=559292 GN=YTA7 PE=1 SV=2)
70891	e_gw1.2.1431.1	hypothetical protein	2034	1.30099	0.286146	8.48e-10	2.32e-09	0.167725	0.248419	ENOG4110X0F(S:Function unknown)	ENOG4110X0F(ribosomal large subunit biogenesis)		sp|Q07395|SYO1_YEAST(Synchronized import protein 1 OS=Saccharomyces cerevisiae (strain ATCC 204508 / S288c) OX=559292 GN=SYO1 PE=1 SV=1)
71204	e_gw1.2.191.1	FKBP-like protein	372	10.1033	0.0603726	0.131828	0.173637	0.962724	0.979231	COG0545(S:Function unknown)	COG0545(-)	PF00254.28(FKBP_C:FKBP-type peptidyl-prolyl cis-trans isomerase)	sp|Q7SCN0|FKBP4_NEUCR(FK506-binding protein 4 OS=Neurospora crassa (strain ATCC 24698 / 74-OR23-1A / CBS 708.71 / DSM 1257 / FGSC 987) OX=367110 GN=fkr-4 PE=3 SV=1)
71359	e_gw1.2.1787.1	hypothetical protein	663	0.703237	0.128872	1.25e-06	2.81e-06	0.33402	0.441196	ENOG4111SZ4(S:Function unknown)	ENOG4111SZ4(Conserved hypothetical, protein)	PF03227.16(GILT:Gamma interferon inducible lysosomal thiol reductase (GILT))
71534	e_gw1.2.1213.1	WSC-domain containing protein	1737	-1.15538	-0.454637	1.12e-05	2.36e-05	0.0368976	0.0667678	ENOG4111FP9(S:Function unknown)	ENOG4111FP9(WSC domain containing)	PF01822.19(WSC:WSC domain)	sp|D4AUF1|WSCD1_ARTBC(WSC domain-containing protein ARB_07867 OS=Arthroderma benhamiae (strain ATCC MYA-4681 / CBS 112371) OX=663331 GN=ARB_07867 PE=1 SV=1)
71725	e_gw1.2.557.1	hypothetical protein	1929	-0.561879	-0.895663	0.445662	0.518394	0.0677548	0.113959	ENOG4110PSQ(S:Function unknown)	ENOG4110PSQ(Conserved hypothetical, protein)	PF04478.12(Mid2:Mid2 like cell wall stress sensor)
71936	e_gw1.2.1246.1	TPR-like protein	1188	0.59736	-2.24626	0.0123353	0.0192945	6.5275e-21	4.65015e-20	COG0457(U:Intracellular trafficking, secretion, and vesicular transport)	COG0457(Major Facilitator Superfamily)	PF12895.7(ANAPC3:Anaphase-promoting complex, cyclosome, subunit 3)	sp|P33313|CNS1_YEAST(Hsp70/Hsp90 co-chaperone CNS1 OS=Saccharomyces cerevisiae (strain ATCC 204508 / S288c) OX=559292 GN=CNS1 PE=1 SV=1)
72182	e_gw1.2.178.1	ubiquitin-conjugating enzyme E2	531	1.58748	0.490579	5.7e-14	1.89e-13	0.00273482	0.00626902	COG5078(S:Function unknown)	COG5078(-)	PF00179.26(UQ_con:Ubiquitin-conjugating enzyme)	sp|Q9Y818|UBC15_SCHPO(Ubiquitin-conjugating enzyme E2 15 OS=Schizosaccharomyces pombe (strain 972 / ATCC 24843) OX=284812 GN=ubc15 PE=1 SV=1)
72278	e_gw1.3.1329.1	glutathione S-transferase Ure2-like protein	684	0.0635698	3.16655	0.728894	0.769674	0	0	COG0625(S:Function unknown)	COG0625(-)	PF13417.6(GST_N_3:Glutathione S-transferase, N-terminal domain); PF13409.6(GST_N_2:Glutathione S-transferase, N-terminal domain); PF02798.20(GST_N:Glutathione S-transferase, N-terminal domain); PF00043.25(GST_C:Glutathione S-transferase, C-terminal domain); PF14497.6(GST_C_3:Glutathione S-transferase, C-terminal domain)	sp|Q0CCY0|GEDE_ASPTN(Glutathione S-transferase-like protein gedE OS=Aspergillus terreus (strain NIH 2624 / FGSC A1156) OX=341663 GN=gedE PE=1 SV=1)
72299	e_gw1.3.1454.1	Methionine sulphoxide reductase B	432	1.39303	0.227806	9.26e-18	3.53e-17	0.275152	0.374174	COG0229(O:Posttranslational modification, protein turnover, chaperones)	COG0229()-reductase)	PF01641.18(SelR:SelR domain)	sp|Q9C5C8|MSRB2_ARATH(Peptide methionine sulfoxide reductase B2, chloroplastic OS=Arabidopsis thaliana OX=3702 GN=MSRB2 PE=1 SV=1)
72561	e_gw1.3.695.1	hypothetical protein	2088	1.27735	0.929013	6.05e-11	1.75e-10	0.000151827	0.000418407	ENOG410YGXE(S:Function unknown)	ENOG410YGXE(adds the third glucose residue to the lipid-linked oligosaccharide precursor for N-linked glycosylation. Transfers glucose from dolichyl phosphate glucose (Dol-P-Glc) onto the lipid-linked oligosaccharide Glc(2)Man(9)GlcNAc(2)-PP-Dol)	PF04922.12(DIE2_ALG10:DIE2/ALG10 family)	sp|Q4HZE0|ALG10_GIBZE(Dol-P-Glc:Glc(2)Man(9)GlcNAc(2)-PP-Dol alpha-1,2-glucosyltransferase OS=Gibberella zeae (strain PH-1 / ATCC MYA-4620 / FGSC 9075 / NRRL 31084) OX=229533 GN=ALG10 PE=3 SV=1)
72604	e_gw1.3.1033.1	putative anaphase-promoting complex subunit ApcB	2598	1.1173	0.656668	2.66e-09	7.06e-09	1.1439e-05	3.56061e-05	ENOG410XRBY(O:Posttranslational modification, protein turnover, chaperones)	ENOG410XRBY(complex subunit)	PF00888.22(Cullin:Cullin family); PF08672.11(ANAPC2:Anaphase promoting complex (APC) subunit 2)	sp|Q9UJX6|ANC2_HUMAN(Anaphase-promoting complex subunit 2 OS=Homo sapiens OX=9606 GN=ANAPC2 PE=1 SV=1)
72966	e_gw1.3.1140.1	rapamycin binding protein FKBP12	360	3.4254	8.71425	0.0039632	0.00657839	0.4831	0.586309	COG0476(H:Coenzyme transport and metabolism); COG0545(O:Posttranslational modification, protein turnover, chaperones)	COG0476(small protein activating enzyme activity); COG0545(Peptidyl-prolyl cis-trans isomerase)	PF00254.28(FKBP_C:FKBP-type peptidyl-prolyl cis-trans isomerase)	sp|Q6M981|FKB1B_NEUCR(FK506-binding protein 1B OS=Neurospora crassa (strain ATCC 24698 / 74-OR23-1A / CBS 708.71 / DSM 1257 / FGSC 987) OX=367110 GN=fkr-3 PE=3 SV=2)
73038	e_gw1.3.399.1	hypothetical protein	2076	2.12911	0.782981	1.58e-145	2.58e-144	5.69352e-43	6.48865e-42	COG1506(S:Function unknown)	COG1506(chromatin modification)	PF00326.21(Peptidase_S9:Prolyl oligopeptidase family); PF05448.12(AXE1:Acetyl xylan esterase (AXE1))	sp|A7UKV4|DPP5_TRIEQ(Dipeptidyl-peptidase 5 OS=Trichophyton equinum OX=63418 GN=DPP5 PE=3 SV=1)
73182	e_gw1.3.788.1	aminopeptidase	1188	0.824406	0.326152	1.7e-40	1.14e-39	1.58002e-14	8.86691e-14	COG2234(S:Function unknown)	COG2234(nuclear assembly factor 1 homolog (S. cerevisiae))	PF04389.17(Peptidase_M28:Peptidase family M28); PF01546.28(Peptidase_M20:Peptidase family M20/M25/M40)	sp|A4V8W0|LAP1_TRIHA(Leucine aminopeptidase 1 OS=Trichoderma harzianum OX=5544 GN=lap1 PE=2 SV=1)
73539	e_gw1.3.861.1	Terpenoid cyclases/Protein prenyltransferase	1269	1.00127	0.177962	7.65e-06	1.63e-05	0.357222	0.465596	COG5029(S:Function unknown)	COG5029(-)	PF00432.21(Prenyltrans:Prenyltransferase and squalene oxidase repeat); PF13243.6(SQHop_cyclase_C:Squalene-hopene cyclase C-terminal domain)	sp|Q5EAD5|PGTB1_BOVIN(Geranylgeranyl transferase type-1 subunit beta OS=Bos taurus OX=9913 GN=PGGT1B PE=2 SV=1)
73622	e_gw1.3.419.1	Thioredoxin-domain containing protein	417	1.02885	0.440573	1.06e-14	3.66e-14	0.000809992	0.00201442	COG0526(S:Function unknown)	COG0526(NUF2, NDC80 kinetochore complex component, homolog (S. cerevisiae))	PF00085.20(Thioredoxin:Thioredoxin); PF13905.6(Thioredoxin_8:Thioredoxin-like); PF13899.6(Thioredoxin_7:Thioredoxin-like); PF14595.6(Thioredoxin_9:Thioredoxin); PF13098.6(Thioredoxin_2:Thioredoxin-like domain); PF04756.13(OST3_OST6:OST3 / OST6 family, transporter family); PF00462.24(Glutaredoxin:Glutaredoxin)	sp|P29429|THIO_EMENI(Thioredoxin OS=Emericella nidulans (strain FGSC A4 / ATCC 38163 / CBS 112.46 / NRRL 194 / M139) OX=227321 GN=TRX1 PE=1 SV=2)
73724	e_gw1.3.1459.1	P-loop containing nucleoside triphosphate hydrolase protein	2175	3.42458	-1.10857	0	0	1.32064e-233	6.53542e-232	COG0542(S:Function unknown)	COG0542(peptidase')	PF07724.14(AAA_2:AAA domain (Cdc48 subfamily)); PF17871.1(AAA_lid_9:AAA lid domain); PF10431.9(ClpB_D2-small:C-terminal, D2-small domain, of ClpB protein); PF00004.29(AAA:ATPase family associated with various cellular activities (AAA)); PF07728.14(AAA_5:AAA domain (dynein-related subfamily)); PF13191.6(AAA_16:AAA ATPase domain); PF00158.26(Sigma54_activat:Sigma-54 interaction domain); PF05621.11(…	sp|O74402|HSP78_SCHPO(Heat shock protein 78, mitochondrial OS=Schizosaccharomyces pombe (strain 972 / ATCC 24843) OX=284812 GN=hsp78 PE=3 SV=1)
73763	e_gw1.3.1659.1	hypothetical protein	5598	1.37473	0.207344	3.14e-67	2.99e-66	0.00054366	0.0013871	COG5021(S:Function unknown)	COG5021(factor srp1)	PF00632.25(HECT:HECT-domain (ubiquitin-transferase))	sp|Q10435|YDE1_SCHPO(Probable ubiquitin fusion degradation protein C12B10.01c OS=Schizosaccharomyces pombe (strain 972 / ATCC 24843) OX=284812 GN=SPAC12B10.01c PE=3 SV=2)
73961	e_gw1.4.947.1	AAA-domain containing protein	3693	1.20004	0.587284	5.77e-13	1.83e-12	2.13938e-08	8.38891e-08	COG0464(L:Replication, recombination and repair)	COG0464(dna replication licensing factor)	PF00004.29(AAA:ATPase family associated with various cellular activities (AAA)); PF09262.11(PEX-1N:Peroxisome biogenesis factor 1, N-terminal); PF13191.6(AAA_16:AAA ATPase domain); PF17862.1(AAA_lid_3:AAA+ lid domain); PF05729.12(NACHT:NACHT domain); PF13401.6(AAA_22:AAA domain); PF13238.6(AAA_18:AAA domain); PF12775.7(AAA_7:P-loop containing dynein motor region); PF07728.14(AAA_5:AAA domain (dyn…	sp|P46463|PEX1_PICPA(Peroxisome biosynthesis protein PAS1 OS=Komagataella pastoris OX=4922 GN=PEX1 PE=3 SV=1)
74129	e_gw1.4.614.1	Glycoside hydrolase	2583	1.58496	3.43296	0.193218	0.246726	0.00282144	0.00645	COG1472(S:Function unknown)	COG1472(-)	PF01915.22(Glyco_hydro_3_C:Glycosyl hydrolase family 3 C-terminal domain); PF00933.21(Glyco_hydro_3:Glycosyl hydrolase family 3 N terminal domain); PF01822.19(WSC:WSC domain); PF14310.6(Fn3-like:Fibronectin type III-like domain)	sp|B0Y0I4|BXLB_ASPFC(Probable exo-1,4-beta-xylosidase bxlB OS=Neosartorya fumigata (strain CEA10 / CBS 144.89 / FGSC A1163) OX=451804 GN=bxlB PE=3 SV=1)
74394	e_gw1.4.709.1	hypothetical protein	4575	1.99035	-0.24008	7.95e-14	2.62e-13	0.159501	0.238184	COG0533(O:Posttranslational modification, protein turnover, chaperones); ENOG410YA1J(S:Function unknown)	COG0533(Required for the formation of a threonylcarbamoyl group on adenosine at position 37 (t(6)A37) in tRNAs that read codons beginning with adenine (By similarity)); ENOG410YA1J(Conserved hypothetical, protein)	PF00814.25(Peptidase_M22:Glycoprotease family)	sp|O94710|QRI7_SCHPO(tRNA N6-adenosine threonylcarbamoyltransferase, mitochondrial OS=Schizosaccharomyces pombe (strain 972 / ATCC 24843) OX=284812 GN=pgp1 PE=3 SV=1)
74396	e_gw1.4.480.1	hypothetical protein	1311	1.71774	1.49985	1.24e-07	2.96e-07	3.7051e-21	2.65997e-20	ENOG4112B8V(S:Function unknown)	ENOG4112B8V(-)
74422	e_gw1.4.1188.1	Acid protease	1737	-0.444302	0.432586	0.48304	0.557039	0.321134	0.426673	ENOG410XNV7(G:Carbohydrate transport and metabolism)	ENOG410XNV7(6-phosphogluconolactonase)	PF00026.23(Asp:Eukaryotic aspartyl protease); PF14543.6(TAXi_N:Xylanase inhibitor N-terminal)	sp|Q8NKB6|OPSB_ASPOR(Probable aspartic-type endopeptidase opsB OS=Aspergillus oryzae (strain ATCC 42149 / RIB 40) OX=510516 GN=opsB PE=2 SV=1)
74715	e_gw1.4.901.1	hypothetical protein	2034	0	8.27612	0.979924	0.984785	0.0281872	0.0526639	COG0443(S:Function unknown)	COG0443(-)	PF00012.20(HSP70:Hsp70 protein)	sp|Q8K0U4|HS12A_MOUSE(Heat shock 70 kDa protein 12A OS=Mus musculus OX=10090 GN=Hspa12a PE=1 SV=1)
75160	e_gw1.5.1047.1	anaphase-promoting complex protein	2385	2.38773	0.510136	3.38e-18	1.31e-17	0.00659822	0.0140983	ENOG410YVZN(O:Posttranslational modification, protein turnover, chaperones)	ENOG410YVZN(complex subunit)	PF12862.7(ANAPC5:Anaphase-promoting complex subunit 5); PF14559.6(TPR_19:Tetratricopeptide repeat)	sp|Q9P4W7|APC5_SCHPO(Anaphase-promoting complex subunit 5 OS=Schizosaccharomyces pombe (strain 972 / ATCC 24843) OX=284812 GN=apc5 PE=1 SV=3)
75179	e_gw1.5.652.1	hypothetical protein	1518	0.429004	-2.26849	0.0103874	0.0163826	8.14548e-07	2.81157e-06	ENOG4111D49(S:Function unknown)	ENOG4111D49(-)	PF08693.10(SKG6:Transmembrane alpha-helix domain)
75405	e_gw1.5.314.1	aspartic endopeptidase	1359	1.72084	-0.561866	8.91e-53	7.21e-52	1.6075e-09	6.83947e-09	ENOG410XNV7(S:Function unknown)	ENOG410XNV7(Transcription factor)	PF00026.23(Asp:Eukaryotic aspartyl protease); PF14543.6(TAXi_N:Xylanase inhibitor N-terminal); PF13650.6(Asp_protease_2:Aspartyl protease)	sp|A0A146F0J0|PEPA_ASPPE(Aspergillopepsin-1 OS=Aspergillus pseudoglaucus OX=1405805 GN=pepA PE=1 SV=1)
75555	e_gw1.5.470.1	hypothetical protein	1839	-0.621488	1.07039	0.662576	0.709758	0.3165	0.421241	COG0596(S:Function unknown)	COG0596(Eukaryotic aspartyl protease)	PF00043.25(GST_C:Glutathione S-transferase, C-terminal domain); PF02798.20(GST_N:Glutathione S-transferase, N-terminal domain); PF12697.7(Abhydrolase_6:Alpha/beta hydrolase family); PF13417.6(GST_N_3:Glutathione S-transferase, N-terminal domain); PF06500.11(DUF1100:Alpha/beta hydrolase of unknown function (DUF1100)); PF00326.21(Peptidase_S9:Prolyl oligopeptidase family); PF12146.8(Hydrolase_4:Ser…	sp|W7N6P0|FUS2_GIBM7(20-hydroxy-prefusarin hydrolase FUS2 OS=Gibberella moniliformis (strain M3125 / FGSC 7600) OX=334819 GN=FUS2 PE=3 SV=1)
76125	e_gw1.5.328.1	hypothetical protein	1974	0.963006	-0.103378	0.0471066	0.0672762	0.792486	0.844795	ENOG410XS1H(S:Function unknown); ENOG4111RK3(S:Function unknown)	ENOG410XS1H(RING finger) protein); ENOG4111RK3(IBR domain)	PF01485.21(IBR:IBR domain, a half RING-finger domain)	sp|Q6PFJ9|ARI1_DANRE(E3 ubiquitin-protein ligase arih1 OS=Danio rerio OX=7955 GN=arih1 PE=2 SV=1)
76309	e_gw1.6.1061.1	neutral alpha-glucosidase ab precursor	2541	1.42223	-0.318888	4.63e-07	1.07e-06	0.311118	0.416233	COG1501(G:Carbohydrate transport and metabolism)	COG1501(hydrolase, family 31)	PF01055.26(Glyco_hydro_31:Glycosyl hydrolases family 31); PF13802.6(Gal_mutarotas_2:Galactose mutarotase-like)	sp|Q9F234|AGL2_BACTQ(Alpha-glucosidase 2 OS=Bacillus thermoamyloliquefaciens OX=1425 PE=3 SV=1)
76333	e_gw1.6.312.1	hypothetical protein	996	1.57419	-0.933983	1.85e-05	3.84e-05	0.000210196	0.000570929	COG0830(O:Posttranslational modification, protein turnover, chaperones)	COG0830(Required for maturation of urease via the functional incorporation of the urease nickel metallocenter (By similarity))	PF01730.16(UreF:UreF)	sp|O14016|UREF_SCHPO(Uncharacterized urease accessory protein UreF-like OS=Schizosaccharomyces pombe (strain 972 / ATCC 24843) OX=284812 GN=SPAC29A4.13 PE=3 SV=1)
76706	e_gw1.6.1274.1	TPR-like protein	1851	0.950169	0.390622	0.000107547	0.000208064	0.0347344	0.063274	ENOG410XNY1(D:Cell cycle control, cell division, chromosome partitioning)	ENOG410XNY1(Cell division cycle 16 homolog (S. cerevisiae))	PF07719.17(TPR_2:Tetratricopeptide repeat); PF12895.7(ANAPC3:Anaphase-promoting complex, cyclosome, subunit 3); PF00515.28(TPR_1:Tetratricopeptide repeat); PF14559.6(TPR_19:Tetratricopeptide repeat); PF13424.6(TPR_12:Tetratricopeptide repeat); PF13432.6(TPR_16:Tetratricopeptide repeat)	sp|P41889|CUT9_SCHPO(Anaphase-promoting complex subunit cut9 OS=Schizosaccharomyces pombe (strain 972 / ATCC 24843) OX=284812 GN=cut9 PE=1 SV=2)
76972	e_gw1.6.1235.1	ubiquitin-conjugating enzyme	501	0.268748	0.719826	0.0971212	0.13171	2.84854e-06	9.36093e-06	ENOG410Y0NU(O:Posttranslational modification, protein turnover, chaperones)	ENOG410Y0NU(ubiquitin-conjugating enzyme)	PF00179.26(UQ_con:Ubiquitin-conjugating enzyme)	sp|O00102|UBC7_SCHPO(Ubiquitin-conjugating enzyme E2-18 kDa OS=Schizosaccharomyces pombe (strain 972 / ATCC 24843) OX=284812 GN=ubc7 PE=2 SV=2)
77316	e_gw1.6.453.1	hypothetical protein	1539	1.87034	0.279837	2.28e-83	2.55e-82	0.00798076	0.0167659	COG0706(U:Intracellular trafficking, secretion, and vesicular transport)	COG0706(Required for the insertion and or proper folding and or complex formation of integral membrane proteins into the membrane. Involved in integration of membrane proteins that insert both dependently and independently of the Sec translocase complex, as well as at least some lipoproteins)	PF02096.20(60KD_IMP:60Kd inner membrane protein)	sp|O13375|OXA1_KAZSE(Mitochondrial inner membrane protein OXA1 OS=Kazachstania servazzii OX=27293 GN=OXA1 PE=3 SV=1)
77666	e_gw1.7.5.1	ubiquitin carboxyl-terminal hydrolase	3849	1.0562	-0.182405	1.09e-17	4.13e-17	0.0407714	0.0730491	COG5077(O:Posttranslational modification, protein turnover, chaperones)	COG5077(ubiquitin carboxyl-terminal hydrolase)	PF00443.29(UCH:Ubiquitin carboxyl-terminal hydrolase); PF13446.6(RPT:A repeated domain in UCH-protein); PF13423.6(UCH_1:Ubiquitin carboxyl-terminal hydrolase)	sp|O42726|UBP2_KLULA(Ubiquitin carboxyl-terminal hydrolase 2 OS=Kluyveromyces lactis (strain ATCC 8585 / CBS 2359 / DSM 70799 / NBRC 1267 / NRRL Y-1140 / WM37) OX=284590 GN=UBP2 PE=3 SV=2)
78003	e_gw1.7.165.1	Cysteine proteinase	1449	1.08406	0.157984	0.0293506	0.0433577	0.6271	0.709262	ENOG410XP0P(O:Posttranslational modification, protein turnover, chaperones)	ENOG410XP0P(ubiquitin carboxyl-terminal hydrolase)	PF01088.21(Peptidase_C12:Ubiquitin carboxyl-terminal hydrolase, family 1)	sp|O04482|UCH2_ARATH(Ubiquitin carboxyl-terminal hydrolase 2 OS=Arabidopsis thaliana OX=3702 GN=UCH2 PE=1 SV=1)
78149	e_gw1.7.318.1	putative 20S cyclosome subunit	5853	1.28185	0.26566	1.95e-11	5.77e-11	0.0696136	0.11664	ENOG410XQ83(O:Posttranslational modification, protein turnover, chaperones)	ENOG410XQ83(Anaphase promoting complex subunit 1)	PF12859.7(ANAPC1:Anaphase-promoting complex subunit 1)	sp|P24686|BIME_EMENI(Negative regulator of mitosis OS=Emericella nidulans (strain FGSC A4 / ATCC 38163 / CBS 112.46 / NRRL 194 / M139) OX=227321 GN=bimE PE=2 SV=2)
78374	e_gw1.7.375.1	RING-5 like protein	1590	1.40115	0.283159	2.67e-59	2.32e-58	0.000186443	0.000509704	ENOG410XP9Y(O:Posttranslational modification, protein turnover, chaperones)	ENOG410XP9Y(peroxiredoxin)	PF01485.21(IBR:IBR domain, a half RING-finger domain); PF00097.25(zf-C3HC4:Zinc finger, C3HC4 type (RING finger))	sp|Q9P3U4|HEL1_SCHPO(E3 ubiquitin-protein ligase dbl4 OS=Schizosaccharomyces pombe (strain 972 / ATCC 24843) OX=284812 GN=dbl4 PE=3 SV=1)
78391	e_gw1.7.85.1	prefoldin subunit	609	1.14894	0.0542335	1.62e-38	1.05e-37	0.556992	0.647213	ENOG410XRZ8(S:Function unknown)	ENOG410XRZ8(Prefoldin, subunit)	PF02996.17(Prefoldin:Prefoldin subunit)	sp|B0ZT47|PRF1_ELSFA(Prefoldin subunit 3 OS=Elsinoe fawcettii OX=40997 GN=PRF1 PE=2 SV=1)
78617	e_gw1.7.727.1	hypothetical protein	1137	2.60013	1.09814	2.63e-18	1.02e-17	4.1374e-11	1.96346e-10	ENOG4111H21(S:Function unknown)	ENOG4111H21(IBR finger domain protein)	PF01485.21(IBR:IBR domain, a half RING-finger domain)	sp|P0CE10|DEAHB_ARATH(ATP-dependent RNA helicase DEAH11, chloroplastic OS=Arabidopsis thaliana OX=3702 GN=At4g01020 PE=3 SV=1)
78942	e_gw1.8.316.1	family 4 glycosyltransferase	1500	1.67967	0.393983	9.1e-13	2.86e-12	0.0537714	0.0933409	COG0438(S:Function unknown)	COG0438(Mitogen-activated protein kinase binding protein 1)	PF08288.12(PIGA:PIGA (GPI anchor biosynthesis)); PF00534.20(Glycos_transf_1:Glycosyl transferases group 1); PF13439.6(Glyco_transf_4:Glycosyltransferase Family 4); PF13692.6(Glyco_trans_1_4:Glycosyl transferases group 1); PF13579.6(Glyco_trans_4_4:Glycosyl transferase 4-like domain); PF13477.6(Glyco_trans_4_2:Glycosyl transferase 4-like)	sp|P87172|GPI3_SCHPO(Phosphatidylinositol N-acetylglucosaminyltransferase gpi3 subunit OS=Schizosaccharomyces pombe (strain 972 / ATCC 24843) OX=284812 GN=gpi3 PE=3 SV=1)
79223	e_gw1.8.214.1	Cyclophilin-like protein	1569	-0.128035	-0.367175	0.361178	0.430223	0.0109653	0.0224796	COG0652(S:Function unknown)	COG0652(-)	PF00160.21(Pro_isomerase:Cyclophilin type peptidyl-prolyl cis-trans isomerase/CLD)	sp|Q4IPB3|CWC27_GIBZE(Peptidyl-prolyl isomerase CWC27 OS=Gibberella zeae (strain PH-1 / ATCC MYA-4620 / FGSC 9075 / NRRL 31084) OX=229533 GN=CWC27 PE=3 SV=1)
79287	e_gw1.8.34.1	family 39 glycosyltransferase	2223	0.616326	0.432268	1.35e-79	1.46e-78	4.92592e-23	3.72727e-22	COG1928(S:Function unknown)	COG1928(WD40)	PF02366.18(PMT:Dolichyl-phosphate-mannose-protein mannosyltransferase); PF16192.5(PMT_4TMC:C-terminal four TMM region of protein-O-mannosyltransferase); PF02815.19(MIR:MIR domain)	sp|P31382|PMT2_YEAST(Dolichyl-phosphate-mannose--protein mannosyltransferase 2 OS=Saccharomyces cerevisiae (strain ATCC 204508 / S288c) OX=559292 GN=PMT2 PE=1 SV=2)
79540	e_gw1.9.472.1	putative glutathione S-transferase	627	-3.45286	-1.75974	1.51e-07	3.6e-07	0.12188	0.18975	ENOG4111VAU(O:Posttranslational modification, protein turnover, chaperones); ENOG410YDU8(O:Posttranslational modification, protein turnover, chaperones); ENOG410YHXW(O:Posttranslational modification, protein turnover, chaperones)	ENOG4111VAU(glutathione Stransferase); ENOG410YDU8(Glutathione S-transferase, C-terminal domain); ENOG410YHXW(Glutathione S-transferase, C-terminal domain)	PF14497.6(GST_C_3:Glutathione S-transferase, C-terminal domain); PF02798.20(GST_N:Glutathione S-transferase, N-terminal domain); PF00043.25(GST_C:Glutathione S-transferase, C-terminal domain); PF13409.6(GST_N_2:Glutathione S-transferase, N-terminal domain); PF13410.6(GST_C_2:Glutathione S-transferase, C-terminal domain); PF13417.6(GST_N_3:Glutathione S-transferase, N-terminal domain)	sp|Q9N4X8|GSTPA_CAEEL(Glutathione S-transferase P 10 OS=Caenorhabditis elegans OX=6239 GN=gst-10 PE=1 SV=3)
79699	e_gw1.9.41.1	Ubiquitin-like protein	300	0.0102213	-0.298803	0.995214	0.99576	0.0222256	0.0426359	COG5227(O:Posttranslational modification, protein turnover, chaperones)	COG5227(smt3 suppressor of mif two 3 homolog)	PF11976.8(Rad60-SLD:Ubiquitin-2 like Rad60 SUMO-like); PF00240.23(ubiquitin:Ubiquitin family)	sp|O13351|PMT3_SCHPO(Ubiquitin-like protein pmt3/smt3 OS=Schizosaccharomyces pombe (strain 972 / ATCC 24843) OX=284812 GN=pmt3 PE=1 SV=2)
79781	e_gw1.9.535.1	hypothetical protein	1563	3.10852	-0.600654	5.07e-273	1.28e-271	5.83678e-26	4.74636e-25	ENOG4111RRJ(S:Function unknown)	ENOG4111RRJ(UBX domain protein)	PF11470.8(TUG-UBL1:TUG ubiquitin-like domain); PF02196.15(RBD:Raf-like Ras-binding domain)	sp|Q8VBT9|ASPC1_MOUSE(Tether containing UBX domain for GLUT4 OS=Mus musculus OX=10090 GN=Aspscr1 PE=1 SV=1)
79796	e_gw1.9.493.1	DWNN-domain containing protein	1995	0.893263	-0.546851	1.86e-07	4.4e-07	6.85646e-07	2.38264e-06	COG5222(S:Function unknown)	COG5222(Retinoblastoma binding protein 6)	PF08783.11(DWNN:DWNN domain); PF13696.6(zf-CCHC_2:Zinc knuckle)	sp|O94264|YORF_SCHPO(Uncharacterized RING finger protein P8B7.15c OS=Schizosaccharomyces pombe (strain 972 / ATCC 24843) OX=284812 GN=SPBP8B7.15c PE=4 SV=1)
80119	e_gw1.9.701.1	HCP-like protein	1773	0.305516	-0.211021	2.98e-05	6.04e-05	0.000439568	0.00113625	COG0790(S:Function unknown)	COG0790(Sel1 domain protein repeat-containing protein)	PF08238.12(Sel1:Sel1 repeat)	sp|P34226|SKT5_YEAST(Protein SKT5 OS=Saccharomyces cerevisiae (strain ATCC 204508 / S288c) OX=559292 GN=SKT5 PE=1 SV=1)
80346	e_gw1.9.547.1	hypothetical protein	1278	-3.25634	0.450661	0.0103557	0.0163411	0.689604	0.76071
80503	e_gw1.10.821.1	vesicle fusion factor	2469	0.876007	0.388415	1.62e-72	1.64e-71	7.32496e-19	4.9191e-18	COG0464(S:Function unknown)	COG0464(Guanine nucleotide exchange factor)	PF00004.29(AAA:ATPase family associated with various cellular activities (AAA)); PF17862.1(AAA_lid_3:AAA+ lid domain); PF13191.6(AAA_16:AAA ATPase domain); PF13401.6(AAA_22:AAA domain); PF02933.17(CDC48_2:Cell division protein 48 (CDC48), domain 2); PF07728.14(AAA_5:AAA domain (dynein-related subfamily)); PF07724.14(AAA_2:AAA domain (Cdc48 subfamily)); PF01078.21(Mg_chelatase:Magnesium chelatase,…	sp|Q9P7Q4|SEC18_SCHPO(Vesicular-fusion protein sec18 OS=Schizosaccharomyces pombe (strain 972 / ATCC 24843) OX=284812 GN=sec18 PE=1 SV=1)
80613	e_gw1.10.621.1	Mov34-domain containing protein	1020	1.11466	-0.19108	1.83e-25	8.86e-25	0.010732	0.0220551	COG1310(S:Function unknown)	COG1310(Conserved hypothetical, protein)	PF01398.21(JAB:JAB1/Mov34/MPN/PAD-1 ubiquitin protease); PF18323.1(CSN5_C:Cop9 signalosome subunit 5 C-terminal domain); PF14464.6(Prok-JAB:Prokaryotic homologs of the JAB domain)	sp|Q4IJM4|CSN5_GIBZE(COP9 signalosome complex subunit 5 OS=Gibberella zeae (strain PH-1 / ATCC MYA-4620 / FGSC 9075 / NRRL 31084) OX=229533 GN=RRI1 PE=3 SV=1)
80645	e_gw1.10.434.1	hypothetical protein	966	-1	9.10329	0.60506	0.66025	0.057352	0.098944
81048	e_gw1.10.651.1	hypothetical protein	2007	1.47604	0.370086	4.29e-20	1.78e-19	0.0018328	0.00431351	COG0476(S:Function unknown)	COG0476(Chromosome 9 open reading frame 64)	PF00899.21(ThiF:ThiF family); PF14732.6(UAE_UbL:Ubiquitin/SUMO-activating enzyme ubiquitin-like domain); PF10585.9(UBA_e1_thiolCys:Ubiquitin-activating enzyme active site)	sp|O42939|UBA2_SCHPO(Ubiquitin-activating enzyme E1-like OS=Schizosaccharomyces pombe (strain 972 / ATCC 24843) OX=284812 GN=uba2 PE=1 SV=1)
81742	e_gw1.11.724.1	hypothetical protein	1032	0.912313	-0.278169	5.93e-26	2.91e-25	8.97838e-05	0.000253697	COG0501(S:Function unknown)	COG0501(Protein of unknown function (DUF2462))	PF01435.18(Peptidase_M48:Peptidase family M48)	sp|Q9P7G4|OMA1_SCHPO(Mitochondrial metalloendopeptidase OMA1 OS=Schizosaccharomyces pombe (strain 972 / ATCC 24843) OX=284812 GN=oma1 PE=3 SV=1)
81785	e_gw1.11.276.1	26S proteasome regulatory complex%2C ATPase RPT4	1176	1.15818	-0.124716	4.89e-69	4.74e-68	0.0496622	0.087123	COG1222(M:Cell wall/membrane/envelope biogenesis)	COG1222(Catalyzes the first step in hexosamine metabolism, converting fructose-6P into glucosamine-6P using glutamine as a nitrogen source (By similarity))	PF00004.29(AAA:ATPase family associated with various cellular activities (AAA)); PF16450.5(Prot_ATP_ID_OB:Proteasomal ATPase OB C-terminal domain); PF17862.1(AAA_lid_3:AAA+ lid domain); PF13191.6(AAA_16:AAA ATPase domain); PF07728.14(AAA_5:AAA domain (dynein-related subfamily)); PF07724.14(AAA_2:AAA domain (Cdc48 subfamily)); PF05496.12(RuvB_N:Holliday junction DNA helicase RuvB P-loop domain); P…	sp|O74445|PRS10_SCHPO(Probable 26S proteasome subunit rpt4 OS=Schizosaccharomyces pombe (strain 972 / ATCC 24843) OX=284812 GN=rpt4 PE=3 SV=2)
81859	e_gw1.11.335.1	Ubiquitin-conjugating enzyme	474	1.22497	0.67524	5.67e-08	1.38e-07	0.000247472	0.000664955	COG5078(E:Amino acid transport and metabolism)	COG5078(asparagine synthetase)	PF00179.26(UQ_con:Ubiquitin-conjugating enzyme); PF14461.6(Prok-E2_B:Prokaryotic E2 family B)	sp|P40984|UBC9_SCHPO(SUMO-conjugating enzyme ubc9 OS=Schizosaccharomyces pombe (strain 972 / ATCC 24843) OX=284812 GN=hus5 PE=1 SV=1)
81949	e_gw1.11.176.1	hypothetical protein	2052	2.76308	0.258828	8.6e-11	2.47e-10	0.415692	0.524804	COG5082(O:Posttranslational modification, protein turnover, chaperones); COG5082(U:Intracellular trafficking, secretion, and vesicular transport)	COG5082(zinc finger); COG5082(zinc finger)
82006	e_gw1.12.570.1	glutamate carboxypeptidase 2	2388	1.63109	-0.974095	0	0	0	0	COG2234(S:Function unknown)	COG2234(-)	PF04253.15(TFR_dimer:Transferrin receptor-like dimerisation domain); PF04389.17(Peptidase_M28:Peptidase family M28); PF02225.22(PA:PA domain)	sp|D4B1R0|GCP1_ARTBC(Probable glutamate carboxypeptidase ARB_02390 OS=Arthroderma benhamiae (strain ATCC MYA-4681 / CBS 112371) OX=663331 GN=ARB_02390 PE=1 SV=1)
82307	e_gw1.12.615.1	peroxisomal biogenesis factor 2	1314	0.515116	0.417404	0.010684	0.0168096	0.0062206	0.0133656	ENOG41107WE(O:Posttranslational modification, protein turnover, chaperones)	ENOG41107WE(Peroxisomal biogenesis factor 2)	PF04757.14(Pex2_Pex12:Pex2 / Pex12 amino terminal region); PF15227.6(zf-C3HC4_4:zinc finger of C3HC4-type, RING)	sp|P51021|PEX2_PODAS(Peroxisomal biogenesis factor 2 OS=Podospora anserina OX=5145 GN=PEX2 PE=3 SV=1)
82375	e_gw1.12.377.1	hypothetical protein	2505	-1.48461	-0.405952	5.49e-295	1.47e-293	3.83852e-26	3.14351e-25	ENOG410Z5DF(S:Function unknown)	ENOG410Z5DF(-)	PF13639.6(zf-RING_2:Ring finger domain); PF02225.22(PA:PA domain); PF13923.6(zf-C3HC4_2:Zinc finger, C3HC4 type (RING finger)); PF12678.7(zf-rbx1:RING-H2 zinc finger domain); PF00097.25(zf-C3HC4:Zinc finger, C3HC4 type (RING finger)); PF17123.5(zf-RING_11:RING-like zinc finger); PF14634.6(zf-RING_5:zinc-RING finger domain); PF13445.6(zf-RING_UBOX:RING-type zinc-finger); PF13920.6(zf-C3HC4_3:Zinc …	sp|O54965|RNF13_MOUSE(E3 ubiquitin-protein ligase RNF13 OS=Mus musculus OX=10090 GN=Rnf13 PE=1 SV=2)
82413	e_gw1.12.653.1	peptidyl-prolyl cis-trans isomerase	549	0.282384	-0.252992	0.186145	0.238462	0.18389	0.269216	COG0652(S:Function unknown)	COG0652(Conserved hypothetical, protein)	PF00160.21(Pro_isomerase:Cyclophilin type peptidyl-prolyl cis-trans isomerase/CLD)	sp|Q4IPH4|PPIH_GIBZE(Peptidyl-prolyl cis-trans isomerase H OS=Gibberella zeae (strain PH-1 / ATCC MYA-4620 / FGSC 9075 / NRRL 31084) OX=229533 GN=CYP3 PE=3 SV=1)
82444	e_gw1.12.99.1	UEV-domain containing protein	1632	1.5595	0.660573	2.38e-12	7.37e-12	4.49082e-05	0.000131388	ENOG410XT2Q(U:Intracellular trafficking, secretion, and vesicular transport)	ENOG410XT2Q(Tumor susceptibility gene 101)	PF05743.13(UEV:UEV domain); PF09454.10(Vps23_core:Vps23 core domain)	sp|Q61187|TS101_MOUSE(Tumor susceptibility gene 101 protein OS=Mus musculus OX=10090 GN=Tsg101 PE=1 SV=2)
82526	e_gw1.12.367.1	hypothetical protein	852	0.46048	0.297905	0.320528	0.386397	0.32362	0.429236	ENOG410Y8AA(S:Function unknown)	ENOG410Y8AA(Conserved hypothetical, protein)	PF17110.5(TFB6:Subunit 11 of the general transcription factor TFIIH)
82840	e_gw1.13.301.1	WSC-domain containing protein	2256	-0.0395284	1.3501	0.957962	0.975948	0.0031469	0.00712538	ENOG4111FP9(L:Replication, recombination and repair)	ENOG4111FP9(DNA damage response protein RcaA)	PF01822.19(WSC:WSC domain)	sp|Q5QQ53|XYLT_DROPS(Xylosyltransferase oxt OS=Drosophila pseudoobscura pseudoobscura OX=46245 GN=oxt PE=2 SV=1)
82849	e_gw1.13.294.1	hypothetical protein	849	0.781868	0.426609	1.32e-31	7.47e-31	5.98602e-07	2.09115e-06	ENOG410XRF2(S:Function unknown)	ENOG410XRF2(ribophorin II)	PF05817.14(Ribophorin_II:Oligosaccharyltransferase subunit Ribophorin II)	sp|Q93Z16|RPN2_ARATH(Dolichyl-diphosphooligosaccharide--protein glycosyltransferase subunit 2 OS=Arabidopsis thaliana OX=3702 GN=RPN2 PE=1 SV=1)
83103	e_gw1.13.272.1	hypothetical protein	1341	-0.631681	-0.0899327	2.53e-54	2.09e-53	0.0271894	0.051047	ENOG410Z5DF(O:Posttranslational modification, protein turnover, chaperones)	ENOG410Z5DF(Ring finger protein)	PF13639.6(zf-RING_2:Ring finger domain); PF17123.5(zf-RING_11:RING-like zinc finger); PF13923.6(zf-C3HC4_2:Zinc finger, C3HC4 type (RING finger)); PF00097.25(zf-C3HC4:Zinc finger, C3HC4 type (RING finger)); PF12678.7(zf-rbx1:RING-H2 zinc finger domain); PF14634.6(zf-RING_5:zinc-RING finger domain); PF13445.6(zf-RING_UBOX:RING-type zinc-finger); PF12861.7(zf-ANAPC11:Anaphase-promoting complex subu…	sp|Q9H6Y7|RN167_HUMAN(E3 ubiquitin-protein ligase RNF167 OS=Homo sapiens OX=9606 GN=RNF167 PE=1 SV=1)
83248	e_gw1.13.143.1	hypothetical protein	591	1.89289	0.785233	2.14e-34	1.29e-33	4.46718e-13	2.3515e-12	ENOG41121N2(H:Coenzyme transport and metabolism)	ENOG41121N2(riboflavin biosynthesis protein ribF)	PF13639.6(zf-RING_2:Ring finger domain); PF12678.7(zf-rbx1:RING-H2 zinc finger domain); PF12861.7(zf-ANAPC11:Anaphase-promoting complex subunit 11 RING-H2 finger); PF13920.6(zf-C3HC4_3:Zinc finger, C3HC4 type (RING finger))	sp|P38239|YBR2_YEAST(Uncharacterized RING finger protein YBR062C OS=Saccharomyces cerevisiae (strain ATCC 204508 / S288c) OX=559292 GN=YBR062C PE=1 SV=2)
83926	e_gw1.15.75.1	P-loop containing nucleoside triphosphate hydrolase protein	1719	2.56399	0.269449	1.33e-29	7.2e-29	0.0328138	0.0603336	COG1219(O:Posttranslational modification, protein turnover, chaperones)	COG1219(ATP-dependent specificity component of the Clp protease. It directs the protease to specific substrates. Can perform chaperone functions in the absence of ClpP (By similarity))	PF07724.14(AAA_2:AAA domain (Cdc48 subfamily)); PF00004.29(AAA:ATPase family associated with various cellular activities (AAA)); PF10431.9(ClpB_D2-small:C-terminal, D2-small domain, of ClpB protein); PF00493.23(MCM:MCM P-loop domain); PF07728.14(AAA_5:AAA domain (dynein-related subfamily)); PF13401.6(AAA_22:AAA domain)	sp|P38323|CLPX_YEAST(ATP-dependent clpX-like chaperone, mitochondrial OS=Saccharomyces cerevisiae (strain ATCC 204508 / S288c) OX=559292 GN=MCX1 PE=1 SV=1)
84010	e_gw1.15.166.1	ATPase%2C AAA family protein	2949	1.41534	0.359896	2.74e-27	1.41e-26	0.00357304	0.00801574	COG0464(S:Function unknown)	COG0464(Conserved hypothetical, protein)	PF00004.29(AAA:ATPase family associated with various cellular activities (AAA)); PF17862.1(AAA_lid_3:AAA+ lid domain); PF05496.12(RuvB_N:Holliday junction DNA helicase RuvB P-loop domain); PF13191.6(AAA_16:AAA ATPase domain); PF13173.6(AAA_14:AAA domain); PF13671.6(AAA_33:AAA domain)	sp|F6QV99|ATAD1_BOVIN(ATPase family AAA domain-containing protein 1 OS=Bos taurus OX=9913 GN=ATAD1 PE=2 SV=2)
84181	e_gw1.15.564.1	Ubiquitin-conjugating enzyme	450	0.880861	0.434074	1.28e-14	4.39e-14	1.00994e-05	3.16812e-05	COG5078(S:Function unknown)	COG5078(-)	PF00179.26(UQ_con:Ubiquitin-conjugating enzyme)	sp|P35128|UBE2N_DROME(Ubiquitin-conjugating enzyme E2 N OS=Drosophila melanogaster OX=7227 GN=ben PE=1 SV=1)
84355	e_gw1.15.172.1	Peptidyl-prolyl cis-trans isomerase-like 1	489	0.164854	0.200403	0.845938	0.877112	0.7643	0.822805	COG0652(U:Intracellular trafficking, secretion, and vesicular transport)	COG0652(signal peptide peptidase)	PF00160.21(Pro_isomerase:Cyclophilin type peptidyl-prolyl cis-trans isomerase/CLD)	sp|Q4I1Y1|PPIL1_GIBZE(Peptidyl-prolyl cis-trans isomerase-like 1 OS=Gibberella zeae (strain PH-1 / ATCC MYA-4620 / FGSC 9075 / NRRL 31084) OX=229533 GN=CYP1 PE=3 SV=1)
84640	e_gw1.16.543.1	glutathione S-transferase	1020	1.9253	1.05918	2.64e-08	6.56e-08	3.41448e-08	1.31987e-07	ENOG410XQW2(O:Posttranslational modification, protein turnover, chaperones)	ENOG410XQW2(glutathione)	PF00043.25(GST_C:Glutathione S-transferase, C-terminal domain); PF13417.6(GST_N_3:Glutathione S-transferase, N-terminal domain); PF13410.6(GST_C_2:Glutathione S-transferase, C-terminal domain)
84644	e_gw1.16.241.1	hypothetical protein	2580	-0.999044	-0.699712	2.02e-26	1.01e-25	7.22956e-11	3.3687e-10	ENOG410XQMB(O:Posttranslational modification, protein turnover, chaperones)	ENOG410XQMB(ubiquitin C-terminal hydrolase family protein)	PF13423.6(UCH_1:Ubiquitin carboxyl-terminal hydrolase)
84798	e_gw1.16.206.1	hypothetical protein	549	1.55094	0.244203	0.0175431	0.0267519	0.518756	0.609983	ENOG4110XHK(S:Function unknown); ENOG410Z9GZ(S:Function unknown)	ENOG4110XHK(-); ENOG410Z9GZ(-)
85507	e_gw1.17.47.1	Acid protease	1551	0.872731	0.363877	5.58e-10	1.54e-09	3.0772e-08	1.19348e-07	ENOG410XNV7(S:Function unknown)	ENOG410XNV7(Conserved hypothetical, protein)	PF00026.23(Asp:Eukaryotic aspartyl protease); PF14543.6(TAXi_N:Xylanase inhibitor N-terminal)	sp|Q4WNV0|CTSD_ASPFU(Aspartic-type endopeptidase ctsD OS=Neosartorya fumigata (strain ATCC MYA-4609 / Af293 / CBS 101355 / FGSC A1100) OX=330879 GN=ctsD PE=1 SV=1)
86423	e_gw1.19.580.1	hypothetical protein	1194	1.25154	0.652077	0.306984	0.371051	0.655818	0.729352
86934	e_gw1.20.95.1	Acid protease	1332	-1.5013	-0.794681	0.0086132	0.0137389	0.334068	0.441197	ENOG410XNV7(S:Function unknown)	ENOG410XNV7(PtaB protein)	PF00026.23(Asp:Eukaryotic aspartyl protease)	sp|Q4WFS2|Y1220_ASPFU(Probable aspartic-type endopeptidase AFUA_3G01220 OS=Neosartorya fumigata (strain ATCC MYA-4609 / Af293 / CBS 101355 / FGSC A1100) OX=330879 GN=AFUA_3G01220 PE=3 SV=2)
86949	e_gw1.20.374.1	hypothetical protein	1440	0.284303	1.02346	0.621074	0.673532	0.00178025	0.00420051	ENOG410XU28(S:Function unknown)	ENOG410XU28(-)
86996	e_gw1.20.11.1	hypothetical protein	1503	1.43499	-0.29552	2.56e-10	7.18e-10	0.132041	0.202637	COG0476(S:Function unknown)	COG0476(Conserved hypothetical, protein)	PF00899.21(ThiF:ThiF family)	sp|Q06624|RHC31_YEAST(DNA damage tolerance protein RHC31 OS=Saccharomyces cerevisiae (strain ATCC 204508 / S288c) OX=559292 GN=AOS1 PE=1 SV=1)
87029	e_gw1.20.116.1	Serine/threonine-protein kinase	2784	1.85798	-0.132237	2.16e-60	1.91e-59	0.00613112	0.0131978	ENOG410XR01(T:Signal transduction mechanisms)	ENOG410XR01(Unc51-like kinase)	PF12063.8(DUF3543:Domain of unknown function (DUF3543)); PF00069.25(Pkinase:Protein kinase domain); PF07714.17(Pkinase_Tyr:Protein tyrosine kinase)	sp|J4W0G2|ATG1_BEAB2(Serine/threonine-protein kinase ATG1 OS=Beauveria bassiana (strain ARSEF 2860) OX=655819 GN=ATG1 PE=2 SV=1)
87191	e_gw1.20.28.1	hypothetical protein	237	1.10501	-0.680565	0.0103083	0.0162776	0.0831866	0.13637	ENOG410ZIVJ(O:Posttranslational modification, protein turnover, chaperones)	ENOG410ZIVJ(-)	PF13920.6(zf-C3HC4_3:Zinc finger, C3HC4 type (RING finger)); PF14447.6(Prok-RING_4:Prokaryotic RING finger family 4); PF14634.6(zf-RING_5:zinc-RING finger domain); PF13923.6(zf-C3HC4_2:Zinc finger, C3HC4 type (RING finger)); PF12861.7(zf-ANAPC11:Anaphase-promoting complex subunit 11 RING-H2 finger); PF00097.25(zf-C3HC4:Zinc finger, C3HC4 type (RING finger)); PF13639.6(zf-RING_2:Ring finger domain…
87273	e_gw1.20.298.1	LCM-domain containing protein	3054	0.954676	0.371559	3.05e-08	7.56e-08	0.0353514	0.0642715	ENOG410YB9K(S:Function unknown)	ENOG410YB9K(leucine carboxyl methyltransferase)	PF13621.6(Cupin_8:Cupin-like domain); PF13418.6(Kelch_4:Galactose oxidase, central domain); PF04072.14(LCM:Leucine carboxyl methyltransferase); PF13964.6(Kelch_6:Kelch motif); PF13854.6(Kelch_5:Kelch motif); PF08007.12(Cupin_4:Cupin superfamily protein)	sp|Q4IER0|TYW4_GIBZE(tRNA wybutosine-synthesizing protein 4 OS=Gibberella zeae (strain PH-1 / ATCC MYA-4620 / FGSC 9075 / NRRL 31084) OX=229533 GN=PPM2 PE=3 SV=1)
87399	e_gw1.21.271.1	hypothetical protein	3411	2.56478	0.424987	3.68e-13	1.18e-12	0.0466102	0.0822836	ENOG410XRET(O:Posttranslational modification, protein turnover, chaperones)	ENOG410XRET(ubiquitin-conjugating enzyme)	PF00644.20(PARP:Poly(ADP-ribose) polymerase catalytic domain); PF00179.26(UQ_con:Ubiquitin-conjugating enzyme)	sp|Q9VM35|U2QL1_DROME(Ubiquitin-conjugating enzyme E2Q-like protein CG4502 OS=Drosophila melanogaster OX=7227 GN=CG4502 PE=2 SV=1)
87466	e_gw1.21.387.1	hypothetical protein	594	1.8557	-0.787815	9.01e-05	0.000176041	0.0540462	0.0937828	ENOG4111W6V(S:Function unknown)	ENOG4111W6V(phosphatidylinositol N-acetylglucosaminyltransferase)	PF10181.9(PIG-H:GPI-GlcNAc transferase complex, PIG-H component)	sp|Q9Y7L7|GPI15_SCHPO(Phosphatidylinositol N-acetylglucosaminyltransferase subunit gpi15 OS=Schizosaccharomyces pombe (strain 972 / ATCC 24843) OX=284812 GN=gpi15 PE=3 SV=1)
87624	e_gw1.21.318.1	mitochondrial export translocase Oxa2	1083	1.39495	0.143527	5.9e-08	1.44e-07	0.584234	0.672869	ENOG410YT1G(S:Function unknown)	ENOG410YT1G(60Kd inner membrane protein)		sp|Q5R7D0|COX18_PONAB(Cytochrome c oxidase assembly protein COX18, mitochondrial OS=Pongo abelii OX=9601 GN=COX18 PE=2 SV=1)
87944	e_gw1.22.378.1	Ribosomal protein S30	189	-0.833406	0.727769	2.77e-52	2.22e-51	2.1273e-23	1.62292e-22	ENOG41123KC(J:Translation, ribosomal structure and biogenesis)	ENOG41123KC(40s ribosomal protein s30)	PF04758.14(Ribosomal_S30:Ribosomal protein S30)	sp|P0CT62|RS30A_SCHPO(40S ribosomal protein S30-A OS=Schizosaccharomyces pombe (strain 972 / ATCC 24843) OX=284812 GN=rps3001 PE=3 SV=1)
88750	e_gw1.24.98.1	WD domain-containing protein	1170	1.11581	-0.172522	0.000189073	0.00035826	0.476598	0.584784	ENOG410XT9X(S:Function unknown)	ENOG410XT9X(histone H3-K4 methylation)	PF00400.32(WD40:WD domain, G-beta repeat); PF12894.7(ANAPC4_WD40:Anaphase-promoting complex subunit 4 WD40 domain)	sp|P36104|SWD2_YEAST(COMPASS component SWD2 OS=Saccharomyces cerevisiae (strain ATCC 204508 / S288c) OX=559292 GN=SWD2 PE=1 SV=1)
88806	e_gw1.24.91.1	aspartyl protease	1200	0	0.459432	0.974908	0.985721	0.689604	0.760347	ENOG410XNV7(S:Function unknown)	ENOG410XNV7(-)	PF00026.23(Asp:Eukaryotic aspartyl protease); PF14543.6(TAXi_N:Xylanase inhibitor N-terminal)	sp|P11838|CARP_CRYPA(Endothiapepsin OS=Cryphonectria parasitica OX=5116 GN=EAPA PE=1 SV=2)
89013	e_gw1.25.116.1	hypothetical protein	1014	-1.68966	-0.404732	7.59e-05	0.000149148	0.159906	0.238557	ENOG410ZC2F(L:Replication, recombination and repair)	ENOG410ZC2F(Involved in base excision repair of DNA damaged by oxidation or by mutagenic agents. Acts as DNA glycosylase that recognizes and removes damaged bases. Has a preference for oxidized purines, such as 7,8-dihydro-8-oxoguanine (8-oxoG). Has AP (apurinic apyrimidinic) lyase activity and introduces nicks in the DNA strand. Cleaves the DNA backbone by beta-delta elimination to generate a si…	PF08693.10(SKG6:Transmembrane alpha-helix domain)
89324	e_gw1.26.166.1	glutathione S-transferase domain protein	693	1.55997	0.201197	4.17e-14	1.39e-13	0.187025	0.273028	COG0625(J:Translation, ribosomal structure and biogenesis)	COG0625(40S ribosomal protein S24)	PF13417.6(GST_N_3:Glutathione S-transferase, N-terminal domain); PF13409.6(GST_N_2:Glutathione S-transferase, N-terminal domain); PF02798.20(GST_N:Glutathione S-transferase, N-terminal domain); PF13410.6(GST_C_2:Glutathione S-transferase, C-terminal domain); PF00043.25(GST_C:Glutathione S-transferase, C-terminal domain); PF14497.6(GST_C_3:Glutathione S-transferase, C-terminal domain)	sp|J4UHQ8|OPS6_BEAB2(Glutathione S-transferase-like protein OpS6 OS=Beauveria bassiana (strain ARSEF 2860) OX=655819 GN=OpS6 PE=2 SV=1)
89916	e_gw1.27.250.1	hypothetical protein	960	-0.202255	0.440573	0.507174	0.574478	0.12306	0.191362	ENOG411135C(S:Function unknown)	ENOG411135C(-)
90324	e_gw1.28.299.1	Putative glyco protein endopeptidase kae-1	1053	0.864745	0.313499	0.00040359	0.000743558	0.140467	0.213095	COG0533(K:Transcription)	COG0533(enhancer of polycomb homolog)	PF00814.25(Peptidase_M22:Glycoprotease family)	sp|Q4I5V2|KAE1_GIBZE(tRNA N6-adenosine threonylcarbamoyltransferase OS=Gibberella zeae (strain PH-1 / ATCC MYA-4620 / FGSC 9075 / NRRL 31084) OX=229533 GN=KAE1 PE=3 SV=2)
90449	e_gw1.29.70.1	Redoxin	501	1.60607	-0.575777	6.15e-27	3.11e-26	5.51498e-11	2.58801e-10	COG0678(S:Function unknown)	COG0678(adenosine deaminase)	PF08534.10(Redoxin:Redoxin); PF00578.21(AhpC-TSA:AhpC/TSA family)	sp|Q9Y8B8|PRX5_PENCI(Peroxiredoxin Pen c 3 OS=Penicillium citrinum OX=5077 PE=1 SV=1)
90644	e_gw1.29.135.1	putative ariadne RING finger	2403	2.76553	1.6845	0.0429812	0.0618007	0.000348822	0.000918872	ENOG4111TU4(S:Function unknown); ENOG410XP9Y(O:Posttranslational modification, protein turnover, chaperones); ENOG410XS1H(S:Function unknown)	ENOG4111TU4(IBR domain); ENOG410XP9Y(RING finger) protein); ENOG410XS1H(RING finger) protein)	PF01485.21(IBR:IBR domain, a half RING-finger domain); PF18345.1(zf_CCCH_4:Zinc finger domain); PF00642.24(zf-CCCH:Zinc finger C-x8-C-x5-C-x3-H type (and similar)); PF13923.6(zf-C3HC4_2:Zinc finger, C3HC4 type (RING finger)); PF18044.1(zf-CCCH_4:CCCH-type zinc finger); PF13445.6(zf-RING_UBOX:RING-type zinc-finger); PF14634.6(zf-RING_5:zinc-RING finger domain); PF13639.6(zf-RING_2:Ring finger doma…	sp|F4KGU4|DEAHC_ARATH(ATP-dependent RNA helicase DEAH12, chloroplastic OS=Arabidopsis thaliana OX=3702 GN=At5g10370 PE=3 SV=1)
90699	e_gw1.29.43.1	hypothetical protein	1053	-0.035877	-0.14239	0.81863	0.850927	0.416368	0.525442	ENOG410ZQ9Z(O:Posttranslational modification, protein turnover, chaperones)	ENOG410ZQ9Z(akt interacting protein)	PF00179.26(UQ_con:Ubiquitin-conjugating enzyme)	sp|Q7ZYX1|AKTIP_DANRE(AKT-interacting protein OS=Danio rerio OX=7955 GN=aktip PE=2 SV=1)
91008	e_gw1.30.247.1	putative lysosomal protective protein precursor	1833	0.206679	-0.365177	0.061531	0.0860565	0.00368376	0.00824215	COG2939(S:Function unknown)	COG2939(transposon protein)	PF00450.22(Peptidase_S10:Serine carboxypeptidase)	sp|C5FW30|SPCA_ARTOC(Carboxypeptidase S1 homolog A OS=Arthroderma otae (strain ATCC MYA-4605 / CBS 113480) OX=554155 GN=SCPA PE=3 SV=1)
91219	e_gw1.31.181.1	hypothetical protein	936	-3.73419	-8.07682	0.000818142	0.00145924	0.263004	0.360729	ENOG41128ED(S:Function unknown); ENOG410Z7XV(S:Function unknown)	ENOG41128ED(-); ENOG410Z7XV(-)	PF05808.11(Podoplanin:Podoplanin); PF04484.12(QWRF:QWRF family)
91527	e_gw1.33.29.1	hypothetical protein	1617	1.18085	-0.0259409	1.06e-17	4.05e-17	0.821398	0.868016	ENOG410XSGG(S:Function unknown)	ENOG410XSGG(Conserved hypothetical, protein)	PF05577.12(Peptidase_S28:Serine carboxypeptidase S28)	sp|D4AYS6|A1345_ARTBC(Probable extracellular serine carboxypeptidase OS=Arthroderma benhamiae (strain ATCC MYA-4681 / CBS 112371) OX=663331 GN=ARB_01345 PE=1 SV=1)
91684	e_gw1.34.105.1	hypothetical protein	2805	0.480133	1.29972	0.0813692	0.111459	1.37405e-10	6.27615e-10	COG1404(S:Function unknown)	COG1404(-)	PF00082.22(Peptidase_S8:Subtilase family)	sp|P11018|ISP1_BACSU(Major intracellular serine protease OS=Bacillus subtilis (strain 168) OX=224308 GN=isp PE=1 SV=2)
92077	e_gw1.36.129.1	hypothetical protein	807	-1.50668	-0.568642	1.05e-41	7.19e-41	3.26222e-05	9.66344e-05	COG0625(O:Posttranslational modification, protein turnover, chaperones)	COG0625(glutathione Stransferase)	PF13417.6(GST_N_3:Glutathione S-transferase, N-terminal domain); PF02798.20(GST_N:Glutathione S-transferase, N-terminal domain); PF13409.6(GST_N_2:Glutathione S-transferase, N-terminal domain); PF13410.6(GST_C_2:Glutathione S-transferase, C-terminal domain)	sp|P40582|GST1_YEAST(Glutathione S-transferase 1 OS=Saccharomyces cerevisiae (strain ATCC 204508 / S288c) OX=559292 GN=GTT1 PE=1 SV=1)
92679	e_gw1.41.70.1	putative C6 finger domain protein	1989	1.21624	0.42405	4.32e-06	9.36e-06	0.0148689	0.0296035	ENOG410YH19(S:Function unknown)	ENOG410YH19(C6 finger domain protein)	PF00172.18(Zn_clus:Fungal Zn(2)-Cys(6) binuclear cluster domain); PF11951.8(Fungal_trans_2:Fungal specific transcription factor domain)
92887	e_gw1.43.74.1	hypothetical protein	1308	0.37752	0.262036	0.337828	0.405376	0.505596	0.60387	ENOG4110W8X(S:Function unknown); ENOG410YVH2(S:Function unknown)	ENOG4110W8X(-); ENOG410YVH2(-)	PF11951.8(Fungal_trans_2:Fungal specific transcription factor domain); PF00172.18(Zn_clus:Fungal Zn(2)-Cys(6) binuclear cluster domain)	sp|Q05958|ECM22_YEAST(Sterol regulatory element-binding protein ECM22 OS=Saccharomyces cerevisiae (strain ATCC 204508 / S288c) OX=559292 GN=ECM22 PE=1 SV=1)
93095	e_gw1.46.6.1	Gpi16 subunit%2C GPI transamidase component	1827	0.6086	0.076771	4.13e-11	1.2e-10	0.503488	0.601585	ENOG410XRR0(S:Function unknown)	ENOG410XRR0(GPI transamidase component)	PF04113.14(Gpi16:Gpi16 subunit, GPI transamidase component)	sp|P38875|GPI16_YEAST(GPI transamidase component GPI16 OS=Saccharomyces cerevisiae (strain ATCC 204508 / S288c) OX=559292 GN=GPI16 PE=1 SV=2)
93139	e_gw1.47.37.1	hypothetical protein	2985	0.285714	-0.573743	0.000465814	0.000850463	2.52678e-17	1.58206e-16	COG2234(S:Function unknown)	COG2234(chromosome 2 open reading frame 43)	PF04389.17(Peptidase_M28:Peptidase family M28); PF01546.28(Peptidase_M20:Peptidase family M20/M25/M40)	sp|C7Z274|PFF1_NECH7(Vacuolar membrane protease OS=Nectria haematococca (strain 77-13-4 / ATCC MYA-4622 / FGSC 9596 / MPVI) OX=660122 GN=NECHADRAFT_96958 PE=3 SV=1)
93163	e_gw1.47.24.1	ring finger protein	600	-9.3443	7.84549	0.118441	0.158454	0.4831	0.58816	ENOG4111UX5(S:Function unknown)	ENOG4111UX5(IBR domain)	PF01485.21(IBR:IBR domain, a half RING-finger domain); PF00097.25(zf-C3HC4:Zinc finger, C3HC4 type (RING finger))	sp|Q2VJ60|RN19A_PIG(E3 ubiquitin-protein ligase RNF19A OS=Sus scrofa OX=9823 GN=RNF19A PE=2 SV=1)
93402	e_gw1.51.42.1	hypothetical protein	2322	1.47079	0.512615	9.28e-05	0.000180806	0.000760228	0.00189883	ENOG4111FEQ(S:Function unknown); ENOG410ZQC1(S:Function unknown)	ENOG4111FEQ(Protein of unknown function (DUF1399)); ENOG410ZQC1(Conserved hypothetical, protein)	PF07173.12(GRDP-like:Glycine-rich domain-containing protein-like)	sp|Q9ZQ47|GRDP1_ARATH(Glycine-rich domain-containing protein 1 OS=Arabidopsis thaliana OX=3702 GN=GRDP1 PE=2 SV=1)
93737	estExt_Genewise1Plus.C_1_t10080	WSC domain-containing protein	2989	-1.1158	0.834075	6.02e-147	1e-145	9.8951e-147	3.06252e-145	ENOG4111D3F(S:Function unknown)	ENOG4111D3F(-)	PF01822.19(WSC:WSC domain); PF00141.23(peroxidase:Peroxidase)	sp|D4AUF4|WSCD2_ARTBC(WSC domain-containing protein ARB_07870 OS=Arthroderma benhamiae (strain ATCC MYA-4681 / CBS 112371) OX=663331 GN=ARB_07870 PE=1 SV=1)
93788	estExt_Genewise1Plus.C_1_t10218	N-terminal nucleophile aminohydrolases (Ntn hydrolases)	947	1.32352	0.234964	2.22e-120	3.22e-119	4.87352e-07	1.71286e-06	ENOG410XP01(O:Posttranslational modification, protein turnover, chaperones)	ENOG410XP01(The proteasome is a multicatalytic proteinase complex which is characterized by its ability to cleave peptides with Arg, Phe, Tyr, Leu, and Glu adjacent to the leaving group at neutral or slightly basic pH. The proteasome has an ATP-dependent proteolytic activity (By similarity))	PF00227.26(Proteasome:Proteasome subunit); PF10584.9(Proteasome_A_N:Proteasome subunit A N-terminal signature)	sp|P21242|PSA7_YEAST(Probable proteasome subunit alpha type-7 OS=Saccharomyces cerevisiae (strain ATCC 204508 / S288c) OX=559292 GN=PRE10 PE=1 SV=2)
93802	estExt_Genewise1Plus.C_1_t10234	26S proteasome subunit P45	1458	1.44587	0.144971	2.58e-126	3.88e-125	0.00169479	0.0040132	COG1222(S:Function unknown)	COG1222(-)	PF00004.29(AAA:ATPase family associated with various cellular activities (AAA)); PF17862.1(AAA_lid_3:AAA+ lid domain); PF07728.14(AAA_5:AAA domain (dynein-related subfamily)); PF13401.6(AAA_22:AAA domain); PF07724.14(AAA_2:AAA domain (Cdc48 subfamily)); PF13191.6(AAA_16:AAA ATPase domain)	sp|P33299|PRS7_YEAST(26S proteasome regulatory subunit 7 homolog OS=Saccharomyces cerevisiae (strain ATCC 204508 / S288c) OX=559292 GN=RPT1 PE=1 SV=1)
93804	estExt_Genewise1Plus.C_1_t10236	T-complex protein 1	1700	0.97146	0.0654651	9.36e-76	9.71e-75	0.126285	0.195653	COG0459(S:Function unknown)	COG0459(-)	PF00118.24(Cpn60_TCP1:TCP-1/cpn60 chaperonin family)	sp|P50999|TCPD_SCHPO(T-complex protein 1 subunit delta OS=Schizosaccharomyces pombe (strain 972 / ATCC 24843) OX=284812 GN=cct4 PE=2 SV=2)
93903	estExt_Genewise1Plus.C_1_t10449	oligosaccharyltransferase alpha subunit	1649	0.8789	0.582442	6.74e-97	8.47e-96	6.00386e-19	4.03777e-18	ENOG410XQVZ(S:Function unknown)	ENOG410XQVZ(ribophorin I)	PF04597.14(Ribophorin_I:Ribophorin I)	sp|Q9ZUA0|OST1B_ARATH(Dolichyl-diphosphooligosaccharide--protein glycosyltransferase subunit 1B OS=Arabidopsis thaliana OX=3702 GN=OST1B PE=1 SV=1)
93989	estExt_Genewise1Plus.C_1_t20123	T-complex protein 1	1818	0.93955	0.0362219	1.29e-59	1.13e-58	0.438546	0.546573	ENOG410XPXR(O:Posttranslational modification, protein turnover, chaperones)	ENOG410XPXR(t-complex protein 1)	PF00118.24(Cpn60_TCP1:TCP-1/cpn60 chaperonin family)	sp|P78921|TCPQ_SCHPO(Probable T-complex protein 1 subunit theta OS=Schizosaccharomyces pombe (strain 972 / ATCC 24843) OX=284812 GN=cct8 PE=2 SV=3)
94652	estExt_Genewise1Plus.C_1_t50033	26S proteasome regulatory subunit	1518	0.848986	0.0426317	4.75e-69	4.61e-68	0.34342	0.451358	COG1310(K:Transcription)	COG1310(dna-directed rna polymerase iii subunit)	PF01398.21(JAB:JAB1/Mov34/MPN/PAD-1 ubiquitin protease); PF13012.6(MitMem_reg:Maintenance of mitochondrial structure and function); PF14464.6(Prok-JAB:Prokaryotic homologs of the JAB domain)	sp|P41878|RPN11_SCHPO(26S proteasome regulatory subunit rpn11 OS=Schizosaccharomyces pombe (strain 972 / ATCC 24843) OX=284812 GN=rpn11 PE=1 SV=2)
94880	estExt_Genewise1Plus.C_1_t50493	peptidase	1311	0.660352	-0.572191	1.36e-10	3.87e-10	4.33792e-11	2.05441e-10	COG2234(S:Function unknown)	COG2234(-)	PF04389.17(Peptidase_M28:Peptidase family M28); PF01546.28(Peptidase_M20:Peptidase family M20/M25/M40)	sp|A4R640|LAP1_MAGO7(Leucine aminopeptidase 1 OS=Magnaporthe oryzae (strain 70-15 / ATCC MYA-4617 / FGSC 8958) OX=242507 GN=LAP1 PE=3 SV=1)
94937	estExt_Genewise1Plus.C_1_t60159	putative 26S proteasome regulatory subunit Rpn2	3583	1.41188	-0.289831	1.16e-150	1.98e-149	1.45439e-09	6.21945e-09	COG5116(O:Posttranslational modification, protein turnover, chaperones)	COG5116(26s proteasome)	PF18004.1(RPN2_C:26S proteasome regulatory subunit RPN2 C-terminal domain); PF01851.22(PC_rep:Proteasome/cyclosome repeat); PF13646.6(HEAT_2:HEAT repeats); PF13513.6(HEAT_EZ:HEAT-like repeat)	sp|O74762|RPN2_SCHPO(26S proteasome regulatory subunit rpn2 OS=Schizosaccharomyces pombe (strain 972 / ATCC 24843) OX=284812 GN=rpn2 PE=1 SV=1)
95070	estExt_Genewise1Plus.C_1_t60451	DnaJ-domain containing protein	1337	-0.557612	0.63196	0.23317	0.292256	0.173749	0.256439	COG0484(S:Function unknown)	COG0484(Heterokaryon incompatibility protein (HET))	PF00226.31(DnaJ:DnaJ domain)	sp|Q5GRK1|DNAJ_WOLTR(Chaperone protein DnaJ OS=Wolbachia sp. subsp. Brugia malayi (strain TRS) OX=292805 GN=dnaJ PE=3 SV=1)
95114	estExt_Genewise1Plus.C_2_t10063	hypothetical protein	2995	1.02255	1.17312	2.62e-26	1.3e-25	5.2699e-75	9.20144e-74	ENOG410Z5TQ(S:Function unknown)	ENOG410Z5TQ(Ubiquitin-protein ligase)	PF13920.6(zf-C3HC4_3:Zinc finger, C3HC4 type (RING finger))	sp|P54074|ASI1_YEAST(Protein ASI1 OS=Saccharomyces cerevisiae (strain ATCC 204508 / S288c) OX=559292 GN=ASI1 PE=1 SV=1)
95301	estExt_Genewise1Plus.C_2_t10493	hypothetical protein	2067	0.77798	0.307951	6.93e-11	2e-10	0.00103834	0.00253597	ENOG410XS1H(S:Function unknown)	ENOG410XS1H(-)	PF01485.21(IBR:IBR domain, a half RING-finger domain)	sp|Q9NWF9|RN216_HUMAN(E3 ubiquitin-protein ligase RNF216 OS=Homo sapiens OX=9606 GN=RNF216 PE=1 SV=3)
95431	estExt_Genewise1Plus.C_2_t20268	26S proteasome regulatory subunit rpn1	2922	1.24193	-0.0846363	9.62e-160	1.71e-158	0.0345856	0.0630402	COG5110(O:Posttranslational modification, protein turnover, chaperones)	COG5110(26s proteasome regulatory subunit)	PF17781.1(RPN1_RPN2_N:RPN1/RPN2 N-terminal domain); PF18051.1(RPN1_C:26S proteasome non-ATPase regulatory subunit RPN1 C-terminal); PF01851.22(PC_rep:Proteasome/cyclosome repeat); PF13646.6(HEAT_2:HEAT repeats)	sp|Q7S8R8|RPN1_NEUCR(26S proteasome regulatory subunit rpn-1 OS=Neurospora crassa (strain ATCC 24698 / 74-OR23-1A / CBS 708.71 / DSM 1257 / FGSC 987) OX=367110 GN=rpn-1 PE=3 SV=2)
95455	estExt_Genewise1Plus.C_2_t20325	DnaJ domain-containing protein	728	0.776499	0.447595	9.59e-05	0.000186365	0.0114957	0.0234682	ENOG4110ZJ4(O:Posttranslational modification, protein turnover, chaperones)	ENOG4110ZJ4(DnaJ (Hsp40) homolog, subfamily C, member 8)	PF00226.31(DnaJ:DnaJ domain)	sp|O74746|SPF31_SCHPO(J domain-containing protein spf31 OS=Schizosaccharomyces pombe (strain 972 / ATCC 24843) OX=284812 GN=spf31 PE=4 SV=1)
95471	estExt_Genewise1Plus.C_2_t20361	hypothetical protein	3812	1.07119	0.496525	7.83e-09	2.01e-08	0.00055057	0.00140357	COG5234(O:Posttranslational modification, protein turnover, chaperones); COG5234(Z:Cytoskeleton)	COG5234(Cofactor D); COG5234(Cofactor D)	PF12612.8(TFCD_C:Tubulin folding cofactor D C terminal)	sp|Q28205|TBCD_BOVIN(Tubulin-specific chaperone D OS=Bos taurus OX=9913 GN=TBCD PE=1 SV=1)
95626	estExt_Genewise1Plus.C_2_t30147	hypothetical protein	2947	0.475936	-0.802154	2.09e-09	5.6e-09	1.44279e-25	1.16303e-24	COG0484(S:Function unknown)	COG0484(-)	PF00226.31(DnaJ:DnaJ domain)	sp|P50027|DNAJH_SYNY3(DnAJ-like protein slr0093 OS=Synechocystis sp. (strain PCC 6803 / Kazusa) OX=1111708 GN=slr0093 PE=4 SV=1)
95627	estExt_Genewise1Plus.C_2_t30148	hypothetical protein	763	-0.69891	-0.135126	1.91e-15	6.73e-15	0.132536	0.203364	ENOG4111YG9(S:Function unknown)	ENOG4111YG9(CUE domain)	PF02845.16(CUE:CUE domain)
95652	estExt_Genewise1Plus.C_2_t30194	N-terminal nucleophile aminohydrolases (Ntn hydrolases)	935	1.21662	0.211057	6.52e-119	9.4e-118	9.34742e-06	2.94321e-05	ENOG410XP21(O:Posttranslational modification, protein turnover, chaperones)	ENOG410XP21(The proteasome is a multicatalytic proteinase complex which is characterized by its ability to cleave peptides with Arg, Phe, Tyr, Leu, and Glu adjacent to the leaving group at neutral or slightly basic pH. The proteasome has an ATP-dependent proteolytic activity (By similarity))	PF00227.26(Proteasome:Proteasome subunit); PF10584.9(Proteasome_A_N:Proteasome subunit A N-terminal signature)	sp|P40303|PSA4_YEAST(Proteasome subunit alpha type-4 OS=Saccharomyces cerevisiae (strain ATCC 204508 / S288c) OX=559292 GN=PRE6 PE=1 SV=1)
96231	estExt_Genewise1Plus.C_3_t10339	WSC-domain containing protein	742	0.25623	0.114523	0.345352	0.414077	0.292278	0.394277	ENOG410YQ8K(S:Function unknown)	ENOG410YQ8K(WSC domain)	PF01822.19(WSC:WSC domain)	sp|P84675|PFM_CHAGB(Putative fungistatic metabolite OS=Chaetomium globosum (strain ATCC 6205 / CBS 148.51 / DSM 1962 / NBRC 6347 / NRRL 1970) OX=306901 GN=CHGG_05463 PE=1 SV=2)
96518	estExt_Genewise1Plus.C_3_t30012	hypothetical protein	1825	0.240976	-0.376849	0.00501982	0.00823775	1.2708e-08	5.08648e-08	ENOG410XSZZ(S:Function unknown)	ENOG410XSZZ(UBX domain protein)	PF13899.6(Thioredoxin_7:Thioredoxin-like); PF14555.6(UBA_4:UBA-like domain); PF00789.20(UBX:UBX domain)	sp|Q06682|UBX5_YEAST(UBX domain-containing protein 5 OS=Saccharomyces cerevisiae (strain ATCC 204508 / S288c) OX=559292 GN=UBX5 PE=1 SV=1)
96712	estExt_Genewise1Plus.C_3_t40024	hypothetical protein	2865	0.143877	0.249051	0.0752938	0.103651	0.00089009	0.00220297	COG5236(S:Function unknown); COG5531(B:Chromatin structure and dynamics)	COG5236(zinc finger protein); COG5531(SWI SNF related, matrix associated, actin dependent regulator of chromatin, subfamily d, member)	PF13920.6(zf-C3HC4_3:Zinc finger, C3HC4 type (RING finger))	sp|Q76PD2|HEL2_SCHPO(E3 ubiquitin-protein ligase hel2 OS=Schizosaccharomyces pombe (strain 972 / ATCC 24843) OX=284812 GN=SPCC1223.01 PE=1 SV=2)
96891	estExt_Genewise1Plus.C_4_t20045	hypothetical protein	3095	-0.817404	-0.449274	3.8e-79	4.08e-78	1.80573e-20	1.27559e-19	COG0699(N:Cell motility)	COG0699(Charged multivesicular body protein)	PF00350.23(Dynamin_N:Dynamin family); PF01926.23(MMR_HSR1:50S ribosome-binding GTPase); PF00009.27(GTP_EFTU:Elongation factor Tu GTP binding domain)	sp|Q9USY7|FZO1_SCHPO(Transmembrane GTPase fzo1 OS=Schizosaccharomyces pombe (strain 972 / ATCC 24843) OX=284812 GN=fzo1 PE=3 SV=1)
96926	estExt_Genewise1Plus.C_4_t20111	P-loop containing nucleoside triphosphate hydrolase protein	3117	-0.447459	-4.64386	0.697486	0.74175	3.84376e-13	2.02679e-12	COG0464(S:Function unknown)	COG0464(-)	PF00004.29(AAA:ATPase family associated with various cellular activities (AAA)); PF17866.1(AAA_lid_6:AAA lid domain); PF13604.6(AAA_30:AAA domain)	sp|Q1XDQ9|CFXQ_PYRYE(Protein CfxQ homolog OS=Pyropia yezoensis OX=2788 GN=cfxQ PE=3 SV=1)
97043	estExt_Genewise1Plus.C_4_t20373	Proteasome-domain containing protein	1006	1.38757	0.580245	9e-100	1.15e-98	2.34558e-28	2.02104e-27	ENOG410XQRP(O:Posttranslational modification, protein turnover, chaperones)	ENOG410XQRP(The proteasome is a multicatalytic proteinase complex which is characterized by its ability to cleave peptides with Arg, Phe, Tyr, Leu, and Glu adjacent to the leaving group at neutral or slightly basic pH. The proteasome has an ATP-dependent proteolytic activity (By similarity))	PF00227.26(Proteasome:Proteasome subunit)	sp|P30656|PSB5_YEAST(Proteasome subunit beta type-5 OS=Saccharomyces cerevisiae (strain ATCC 204508 / S288c) OX=559292 GN=PRE2 PE=1 SV=3)
97114	estExt_Genewise1Plus.C_4_t20483	Metalloproteases ("zincins")	2460	-0.329157	-0.165016	0.000138226	0.000264609	0.115531	0.181638	COG0339(E:Amino acid transport and metabolism)	COG0339(oligopeptidase a)	PF01432.20(Peptidase_M3:Peptidase family M3)	sp|A4RF25|PMIP_MAGO7(Mitochondrial intermediate peptidase OS=Magnaporthe oryzae (strain 70-15 / ATCC MYA-4617 / FGSC 8958) OX=242507 GN=OCT1 PE=3 SV=1)
97134	estExt_Genewise1Plus.C_4_t30019	ubiquitin conjugating enzyme	904	-0.623609	0.120842	8.43e-14	2.77e-13	0.184789	0.270405	COG5078(U:Intracellular trafficking, secretion, and vesicular transport)	COG5078(Vacuolar Protein)	PF00179.26(UQ_con:Ubiquitin-conjugating enzyme); PF14461.6(Prok-E2_B:Prokaryotic E2 family B)	sp|Q55EY8|UBE2W_DICDI(Probable ubiquitin-conjugating enzyme E2 W OS=Dictyostelium discoideum OX=44689 GN=ube2w PE=3 SV=1)
97217	estExt_Genewise1Plus.C_4_t30197	Prefoldin beta-like protein	407	0.813278	0.590566	1.24e-08	3.15e-08	4.77216e-05	0.000139179	ENOG4111S6I(O:Posttranslational modification, protein turnover, chaperones)	ENOG4111S6I(prefoldin subunit 2)	PF01920.20(Prefoldin_2:Prefoldin subunit)	sp|Q9UTC9|PFD2_SCHPO(Probable prefoldin subunit 2 OS=Schizosaccharomyces pombe (strain 972 / ATCC 24843) OX=284812 GN=SPAC227.10 PE=3 SV=1)
97324	estExt_Genewise1Plus.C_5_t10332	hypothetical protein	2862	1.16163	-0.807847	4.13e-20	1.71e-19	1.81365e-23	1.38478e-22	ENOG410YG3H(S:Function unknown)	ENOG410YG3H(Fungal specific transcription factor domain)	PF04082.18(Fungal_trans:Fungal specific transcription factor domain); PF00172.18(Zn_clus:Fungal Zn(2)-Cys(6) binuclear cluster domain)	sp|P28349|NIT4_NEUCR(Nitrogen assimilation transcription factor nit-4 OS=Neurospora crassa (strain ATCC 24698 / 74-OR23-1A / CBS 708.71 / DSM 1257 / FGSC 987) OX=367110 GN=nit-4 PE=4 SV=2)
97499	estExt_Genewise1Plus.C_5_t20207	Actin-like ATPase domain-containing protein	1800	-0.425104	-0.853534	1.44e-10	4.08e-10	2.18792e-32	2.06392e-31	COG0443(O:Posttranslational modification, protein turnover, chaperones)	COG0443(Heat shock protein)	PF00012.20(HSP70:Hsp70 protein); PF06723.13(MreB_Mbl:MreB/Mbl protein)	sp|P38788|SSZ1_YEAST(Ribosome-associated complex subunit SSZ1 OS=Saccharomyces cerevisiae (strain ATCC 204508 / S288c) OX=559292 GN=SSZ1 PE=1 SV=2)
97591	estExt_Genewise1Plus.C_5_t20423	alpha/beta-Hydrolase	2206	0.760299	-0.61169	5.15e-10	1.42e-09	8.49372e-11	3.94385e-10	COG1506(E:Amino acid transport and metabolism)	COG1506(peptidase s9 prolyl oligopeptidase active site domain protein)	PF00326.21(Peptidase_S9:Prolyl oligopeptidase family)	sp|A1CSW4|DPP5_ASPCL(Probable dipeptidyl-peptidase 5 OS=Aspergillus clavatus (strain ATCC 1007 / CBS 513.65 / DSM 816 / NCTC 3887 / NRRL 1) OX=344612 GN=dpp5 PE=3 SV=1)
97716	estExt_Genewise1Plus.C_6_t10162	putative thioredoxin reductase	1209	-2.63164	0.324085	9.98e-104	1.31e-102	0.0757548	0.125588	COG0492(O:Posttranslational modification, protein turnover, chaperones)	COG0492(thioredoxin reductase)	PF07992.14(Pyr_redox_2:Pyridine nucleotide-disulphide oxidoreductase); PF00890.24(FAD_binding_2:FAD binding domain); PF01134.22(GIDA:Glucose inhibited division protein A); PF03486.14(HI0933_like:HI0933-like protein); PF13738.6(Pyr_redox_3:Pyridine nucleotide-disulphide oxidoreductase); PF01266.24(DAO:FAD dependent oxidoreductase); PF05834.12(Lycopene_cycl:Lycopene cyclase protein); PF13434.6(K_ox…	sp|D4APQ6|TRXR_ARTBC(Probable thioredoxin reductase ARB_06224 OS=Arthroderma benhamiae (strain ATCC MYA-4681 / CBS 112371) OX=663331 GN=ARB_06224 PE=1 SV=1)
97934	estExt_Genewise1Plus.C_6_t20251	putative zinc metalloprotease	3428	-0.015642	-0.110362	0.808406	0.842317	0.0426902	0.0761772	COG1026(O:Posttranslational modification, protein turnover, chaperones)	COG1026(peptidase)	PF05193.21(Peptidase_M16_C:Peptidase M16 inactive domain); PF00675.20(Peptidase_M16:Insulinase (Peptidase family M16))	sp|Q12496|YO098_YEAST(Uncharacterized protein YOL098C OS=Saccharomyces cerevisiae (strain ATCC 204508 / S288c) OX=559292 GN=YOL098C PE=1 SV=1)
98215	estExt_Genewise1Plus.C_7_t10194	hypothetical protein	1385	1.09516	1.63743	0.159246	0.206528	0.163474	0.243096	ENOG4110XMI(S:Function unknown); ENOG410ZSVK(S:Function unknown)	ENOG4110XMI(WSC domain); ENOG410ZSVK(-)	PF01822.19(WSC:WSC domain)
98306	estExt_Genewise1Plus.C_7_t10397	N-acetylglucosaminyl transferase component	2702	1.6035	0.333519	3.04e-32	1.75e-31	0.0022546	0.00523302	ENOG410XSXI(S:Function unknown)	ENOG410XSXI(Phosphatidylinositol glycan anchor biosynthesis, class Q)	PF05024.15(Gpi1:N-acetylglucosaminyl transferase component (Gpi1))	sp|O14357|GPI1_SCHPO(N-acetylglucosaminyl-phosphatidylinositol biosynthetic protein gpi1 OS=Schizosaccharomyces pombe (strain 972 / ATCC 24843) OX=284812 GN=gpi1 PE=2 SV=1)
98360	estExt_Genewise1Plus.C_7_t20018	hypothetical protein	1854	0.778174	-0.240099	1.15e-49	8.88e-49	1.30283e-05	4.03225e-05	ENOG410XS40(O:Posttranslational modification, protein turnover, chaperones)	ENOG410XS40(26S proteasome nonATPase regulatory subunit)	PF08375.11(Rpn3_C:Proteasome regulatory subunit C-terminal); PF01399.27(PCI:PCI domain)	sp|O42897|RPN3_SCHPO(Probable 26S proteasome regulatory subunit rpn3 OS=Schizosaccharomyces pombe (strain 972 / ATCC 24843) OX=284812 GN=rpn3 PE=3 SV=2)
98369	estExt_Genewise1Plus.C_7_t20043	26S protease regulatory subunit 6B	1385	0.945753	-0.317882	4.13e-50	3.19e-49	1.93665e-09	8.19843e-09	COG1222(O:Posttranslational modification, protein turnover, chaperones)	COG1222(26S protease regulatory subunit)	PF00004.29(AAA:ATPase family associated with various cellular activities (AAA)); PF16450.5(Prot_ATP_ID_OB:Proteasomal ATPase OB C-terminal domain); PF07728.14(AAA_5:AAA domain (dynein-related subfamily)); PF07724.14(AAA_2:AAA domain (Cdc48 subfamily)); PF13191.6(AAA_16:AAA ATPase domain); PF05673.13(DUF815:Protein of unknown function (DUF815)); PF13401.6(AAA_22:AAA domain); PF17862.1(AAA_lid_3:AA…	sp|P78578|PRS6B_ASPNG(26S proteasome regulatory subunit 6B homolog OS=Aspergillus niger OX=5061 GN=tbpA PE=3 SV=1)
98485	estExt_Genewise1Plus.C_7_t20349	T-complex protein 1%2C zeta subunit	1740	0.976217	0.156484	1.9e-72	1.92e-71	0.000689294	0.00173147	ENOG410XQ3Q(O:Posttranslational modification, protein turnover, chaperones)	ENOG410XQ3Q(t-complex protein 1 subunit)	PF00118.24(Cpn60_TCP1:TCP-1/cpn60 chaperonin family)	sp|O94515|TCPZ_SCHPO(T-complex protein 1 subunit zeta OS=Schizosaccharomyces pombe (strain 972 / ATCC 24843) OX=284812 GN=cct6 PE=3 SV=1)
98559	estExt_Genewise1Plus.C_7_t20486	expressed protein	1668	-2.85067	-0.44019	0	0	1.90008e-18	1.24793e-17	ENOG410Y41C(O:Posttranslational modification, protein turnover, chaperones)	ENOG410Y41C(Metacaspase)	PF00656.22(Peptidase_C14:Caspase domain)	sp|Q7S4N5|MCA1B_NEUCR(Metacaspase-1B OS=Neurospora crassa (strain ATCC 24698 / 74-OR23-1A / CBS 708.71 / DSM 1257 / FGSC 987) OX=367110 GN=casB PE=3 SV=2)
98605	estExt_Genewise1Plus.C_7_t30049	augmenter of liver regeneration	958	1.66131	0.249252	4.57e-222	1.01e-220	9.96244e-08	3.734e-07	COG5054(O:Posttranslational modification, protein turnover, chaperones)	COG5054(thiol oxidase activity)	PF04777.13(Evr1_Alr:Erv1 / Alr family)	sp|P56213|ALR_MOUSE(FAD-linked sulfhydryl oxidase ALR OS=Mus musculus OX=10090 GN=Gfer PE=1 SV=2)
98631	estExt_Genewise1Plus.C_7_t30096	ubiquitin carboxyl-terminal hydrolase	1826	1.79983	0.269562	5.08e-55	4.23e-54	0.00145122	0.00347287	ENOG410XQQ0(S:Function unknown)	ENOG410XQQ0(-)	PF00443.29(UCH:Ubiquitin carboxyl-terminal hydrolase); PF13423.6(UCH_1:Ubiquitin carboxyl-terminal hydrolase); PF02148.19(zf-UBP:Zn-finger in ubiquitin-hydrolases and other protein)	sp|Q09738|UBP8_SCHPO(Probable ubiquitin carboxyl-terminal hydrolase 8 OS=Schizosaccharomyces pombe (strain 972 / ATCC 24843) OX=284812 GN=ubp8 PE=3 SV=1)
98657	estExt_Genewise1Plus.C_7_t30131	AAA-domain containing protein	2511	-0.382842	-0.353637	1.69e-08	4.26e-08	1.83604e-08	7.24549e-08	COG0464(S:Function unknown)	COG0464(Rhomboid domain containing)	PF00004.29(AAA:ATPase family associated with various cellular activities (AAA)); PF09336.10(Vps4_C:Vps4 C terminal oligomerisation domain); PF17862.1(AAA_lid_3:AAA+ lid domain); PF13401.6(AAA_22:AAA domain); PF05496.12(RuvB_N:Holliday junction DNA helicase RuvB P-loop domain); PF13191.6(AAA_16:AAA ATPase domain); PF06068.13(TIP49:TIP49 P-loop domain)	sp|P39955|SAP1_YEAST(Protein SAP1 OS=Saccharomyces cerevisiae (strain ATCC 204508 / S288c) OX=559292 GN=SAP1 PE=1 SV=1)
98661	estExt_Genewise1Plus.C_7_t30140	hypothetical protein	1388	0.162485	0.0309629	0.178176	0.228897	0.735406	0.798199	COG5574(S:Function unknown)	COG5574(RAN guanine nucleotide release factor)	PF03105.19(SPX:SPX domain); PF00097.25(zf-C3HC4:Zinc finger, C3HC4 type (RING finger)); PF13920.6(zf-C3HC4_3:Zinc finger, C3HC4 type (RING finger)); PF13923.6(zf-C3HC4_2:Zinc finger, C3HC4 type (RING finger)); PF13639.6(zf-RING_2:Ring finger domain); PF15227.6(zf-C3HC4_4:zinc finger of C3HC4-type, RING)	sp|O14212|YDT7_SCHPO(Uncharacterized RING finger protein C6B12.07c OS=Schizosaccharomyces pombe (strain 972 / ATCC 24843) OX=284812 GN=SPAC6B12.07c PE=4 SV=2)
98671	estExt_Genewise1Plus.C_7_t30162	putative proteasome regulatory particle subunit	1387	1.18143	0.0200352	1.53e-66	1.45e-65	0.784562	0.839442	ENOG410XPG9(O:Posttranslational modification, protein turnover, chaperones)	ENOG410XPG9(26S proteasome non-ATPase regulatory subunit)	PF01399.27(PCI:PCI domain); PF18261.1(Rpn9_C:Rpn9 C-terminal helix)	sp|Q9US13|RPN9_SCHPO(Probable 26S proteasome regulatory subunit rpn9 OS=Schizosaccharomyces pombe (strain 972 / ATCC 24843) OX=284812 GN=rpn9 PE=3 SV=1)
98719	estExt_Genewise1Plus.C_8_t10053	hypothetical protein	1984	-1.05979	-0.294459	4.68e-71	4.66e-70	0.00019522	0.000533068	ENOG41121N2(P:Inorganic ion transport and metabolism)	ENOG41121N2(Component of the sulfite reductase complex that catalyzes the 6-electron reduction of sulfite to sulfide. This is one of several activities required for the biosynthesis of L- cysteine from sulfate. The flavoprotein component catalyzes the electron flow from NADPH - FAD - FMN to the hemoprotein component (By similarity))	PF13639.6(zf-RING_2:Ring finger domain); PF13920.6(zf-C3HC4_3:Zinc finger, C3HC4 type (RING finger)); PF17123.5(zf-RING_11:RING-like zinc finger); PF13923.6(zf-C3HC4_2:Zinc finger, C3HC4 type (RING finger)); PF00097.25(zf-C3HC4:Zinc finger, C3HC4 type (RING finger)); PF12678.7(zf-rbx1:RING-H2 zinc finger domain); PF14634.6(zf-RING_5:zinc-RING finger domain); PF14447.6(Prok-RING_4:Prokaryotic RING…	sp|Q9C1X4|YKW3_SCHPO(Uncharacterized RING finger protein P32A8.03c OS=Schizosaccharomyces pombe (strain 972 / ATCC 24843) OX=284812 GN=SPAP32A8.03c PE=4 SV=1)
98917	estExt_Genewise1Plus.C_8_t10413	ATP-dependent metallopeptidase Hfl	3019	0.662642	0.0487747	1.36e-50	1.06e-49	0.332482	0.43929	COG0465(S:Function unknown)	COG0465(Conserved hypothetical, protein)	PF01434.18(Peptidase_M41:Peptidase family M41); PF00004.29(AAA:ATPase family associated with various cellular activities (AAA)); PF17862.1(AAA_lid_3:AAA+ lid domain); PF07728.14(AAA_5:AAA domain (dynein-related subfamily)); PF13191.6(AAA_16:AAA ATPase domain); PF06068.13(TIP49:TIP49 P-loop domain); PF05496.12(RuvB_N:Holliday junction DNA helicase RuvB P-loop domain)	sp|P32795|YME1_YEAST(Mitochondrial inner membrane i-AAA protease supercomplex subunit YME1 OS=Saccharomyces cerevisiae (strain ATCC 204508 / S288c) OX=559292 GN=YME1 PE=1 SV=1)
98936	estExt_Genewise1Plus.C_8_t10451	expressed protein	1476	-0.161312	-0.275707	0.544702	0.601442	0.156661	0.234472	ENOG410YD58(S:Function unknown)	ENOG410YD58(1,3-beta-glucanosyltransferase)	PF03198.14(Glyco_hydro_72:Glucanosyltransferase)	sp|P56092|EPD1_CANMA(Protein EPD1 OS=Candida maltosa OX=5479 GN=EPD1 PE=3 SV=1)
99049	estExt_Genewise1Plus.C_8_t20166	hypothetical protein	4740	2.12724	0.189062	4.86e-161	8.75e-160	0.00200132	0.00468985	COG5113(O:Posttranslational modification, protein turnover, chaperones)	COG5113(Ubiquitin conjugation factor E4)	PF10408.9(Ufd2P_core:Ubiquitin elongating factor core); PF04564.15(U-box:U-box domain); PF13445.6(zf-RING_UBOX:RING-type zinc-finger); PF13923.6(zf-C3HC4_2:Zinc finger, C3HC4 type (RING finger)); PF02176.18(zf-TRAF:TRAF-type zinc finger); PF00097.25(zf-C3HC4:Zinc finger, C3HC4 type (RING finger)); PF13920.6(zf-C3HC4_3:Zinc finger, C3HC4 type (RING finger)); PF15227.6(zf-C3HC4_4:zinc finger of C3H…	sp|Q9HE05|UFD2_SCHPO(Ubiquitin conjugation factor E4 OS=Schizosaccharomyces pombe (strain 972 / ATCC 24843) OX=284812 GN=ufd2 PE=2 SV=1)
99143	estExt_Genewise1Plus.C_9_t10039	protein arginine N-methyltransferase	1725	1.68658	-0.336725	6.75e-16	2.42e-15	0.119605	0.186712	ENOG410XQYH(S:Function unknown)	ENOG410XQYH(Protein arginine n-methyltransferase)	PF13649.6(Methyltransf_25:Methyltransferase domain); PF08241.12(Methyltransf_11:Methyltransferase domain); PF06325.13(PrmA:Ribosomal protein L11 methyltransferase (PrmA)); PF13847.6(Methyltransf_31:Methyltransferase domain); PF13489.6(Methyltransf_23:Methyltransferase domain); PF12847.7(Methyltransf_18:Methyltransferase domain); PF05175.14(MTS:Methyltransferase small domain); PF08242.12(Methyltra…	sp|O13648|ANM3_SCHPO(Ribosomal protein arginine N-methyltransferase rmt3 OS=Schizosaccharomyces pombe (strain 972 / ATCC 24843) OX=284812 GN=rmt3 PE=1 SV=3)
99189	estExt_Genewise1Plus.C_9_t10119	Eukaryotic type KH-domain (KH-domain type I)	887	-0.221632	-0.108509	0.0493294	0.0702526	0.359246	0.467839	COG1094(S:Function unknown)	COG1094(Non-catalytic subunit of the tRNA-splicing endonuclease complex, a complex responsible for identification and cleavage of the splice sites in pre-tRNA. It cleaves pre-tRNA at the 5' and 3' splice sites to release the intron. The products are an intron and two tRNA half-molecules bearing 2',3' cyclic phosphate and 5'-OH termini. There are no conserved sequences at the splice sites, but the…	PF17903.1(KH_8:Krr1 KH1 domain)	sp|Q4IN63|PNO1_GIBZE(Pre-rRNA-processing protein PNO1 OS=Gibberella zeae (strain PH-1 / ATCC MYA-4620 / FGSC 9075 / NRRL 31084) OX=229533 GN=PNO1 PE=3 SV=1)
99350	estExt_Genewise1Plus.C_9_t10418	N-terminal nucleophile aminohydrolases (Ntn hydrolases)	794	1.31048	0.380833	1.29e-108	1.75e-107	2.41432e-15	1.40164e-14	ENOG410XR7X(O:Posttranslational modification, protein turnover, chaperones)	ENOG410XR7X(The proteasome is a multicatalytic proteinase complex which is characterized by its ability to cleave peptides with Arg, Phe, Tyr, Leu, and Glu adjacent to the leaving group at neutral or slightly basic pH. The proteasome has an ATP-dependent proteolytic activity (By similarity))	PF00227.26(Proteasome:Proteasome subunit); PF10584.9(Proteasome_A_N:Proteasome subunit A N-terminal signature)	sp|P21243|PSA1_YEAST(Proteasome subunit alpha type-1 OS=Saccharomyces cerevisiae (strain ATCC 204508 / S288c) OX=559292 GN=SCL1 PE=1 SV=1)
99603	estExt_Genewise1Plus.C_10_t10178	TPR-like protein	2024	0.226293	-0.0149443	8.22e-05	0.000161016	0.758486	0.818737	COG0484(S:Function unknown)	COG0484(actin cortical patch localization)	PF00515.28(TPR_1:Tetratricopeptide repeat); PF07719.17(TPR_2:Tetratricopeptide repeat); PF13414.6(TPR_11:TPR repeat); PF00226.31(DnaJ:DnaJ domain); PF14559.6(TPR_19:Tetratricopeptide repeat); PF13428.6(TPR_14:Tetratricopeptide repeat); PF13432.6(TPR_16:Tetratricopeptide repeat); PF13424.6(TPR_12:Tetratricopeptide repeat); PF13371.6(TPR_9:Tetratricopeptide repeat); PF13431.6(TPR_17:Tetratricopepti…	sp|Q9HGM9|DNJC7_SCHPO(DnaJ homolog subfamily C member 7 homolog OS=Schizosaccharomyces pombe (strain 972 / ATCC 24843) OX=284812 GN=SPBC543.02c PE=4 SV=1)
99653	estExt_Genewise1Plus.C_10_t10287	isoprenylcysteine carboxyl methyltransferase	1130	0.893414	0.513879	0.00466318	0.00768152	0.099633	0.159848	COG2020(O:Posttranslational modification, protein turnover, chaperones)	COG2020(isoprenylcysteine carboxyl methyltransferase)	PF04140.14(ICMT:Isoprenylcysteine carboxyl methyltransferase (ICMT) family); PF04191.13(PEMT:Phospholipid methyltransferase); PF06966.12(DUF1295:Protein of unknown function (DUF1295))	sp|P32584|STE14_YEAST(Protein-S-isoprenylcysteine O-methyltransferase OS=Saccharomyces cerevisiae (strain ATCC 204508 / S288c) OX=559292 GN=STE14 PE=1 SV=1)
99698	estExt_Genewise1Plus.C_10_t10377	heat shock protein 70-like protein	3366	1.27702	-0.0169134	5.71e-174	1.08e-172	0.785	0.839717	COG0443(S:Function unknown)	COG0443(Conserved hypothetical, protein)	PF00012.20(HSP70:Hsp70 protein)	sp|Q7ZUW2|HYOU1_DANRE(Hypoxia up-regulated protein 1 OS=Danio rerio OX=7955 GN=hyou1 PE=2 SV=1)
99788	estExt_Genewise1Plus.C_10_t20054	hypothetical protein	2383	-1.74205	-1.82167	1.55e-55	1.3e-54	3.8161e-136	1.11401e-134	ENOG4111UX5(S:Function unknown)	ENOG4111UX5(IBR domain)	PF01485.21(IBR:IBR domain, a half RING-finger domain)	sp|Q9WVS6|PRKN_MOUSE(E3 ubiquitin-protein ligase parkin OS=Mus musculus OX=10090 GN=Prkn PE=1 SV=1)
99888	estExt_Genewise1Plus.C_10_t20254	putative mitochondrial processing peptidase alpha subunit	1980	1.16794	0.561562	5.35e-78	5.68e-77	2.92586e-20	2.05432e-19	COG0612(U:Intracellular trafficking, secretion, and vesicular transport)	COG0612(vacuolar protein sorting)	PF05193.21(Peptidase_M16_C:Peptidase M16 inactive domain); PF00675.20(Peptidase_M16:Insulinase (Peptidase family M16))	sp|P23955|MPPA_NEUCR(Mitochondrial-processing peptidase subunit alpha OS=Neurospora crassa (strain ATCC 24698 / 74-OR23-1A / CBS 708.71 / DSM 1257 / FGSC 987) OX=367110 GN=mpp PE=1 SV=2)
99978	estExt_Genewise1Plus.C_11_t10107	ATG5 protein	1193	0.916032	-0.8784	0.000514824	0.000936193	9.77428e-07	3.35377e-06	ENOG410XQ71(U:Intracellular trafficking, secretion, and vesicular transport)	ENOG410XQ71(autophagy protein)	PF04106.12(APG5:Autophagy protein Apg5)	sp|I1S039|ATG5_GIBZE(Autophagy-related protein 5 OS=Gibberella zeae (strain PH-1 / ATCC MYA-4620 / FGSC 9075 / NRRL 31084) OX=229533 GN=ATG5 PE=3 SV=1)
99979	estExt_Genewise1Plus.C_11_t10108	hypothetical protein	1210	-0.290019	-1.65335	0.448274	0.521233	2.43214e-06	8.02962e-06	ENOG41120RQ(S:Function unknown)	ENOG41120RQ(conserved hypothetical protein)
100019	estExt_Genewise1Plus.C_11_t10202	putative membrane associated DnaJ chaperone	1083	1.05142	1.16926	6.65e-18	2.55e-17	3.31364e-10	1.47283e-09	ENOG4111GR7(U:Intracellular trafficking, secretion, and vesicular transport)	ENOG4111GR7(membrane associated DnaJ chaperone)	PF00226.31(DnaJ:DnaJ domain)	sp|A1TLH8|DNAJ_ACIAC(Chaperone protein DnaJ OS=Acidovorax citrulli (strain AAC00-1) OX=397945 GN=dnaJ PE=3 SV=1)
100044	estExt_Genewise1Plus.C_11_t10268	hypothetical protein	1796	1.64307	0.071015	9.43e-38	6.05e-37	0.483922	0.582115	ENOG410XRKY(O:Posttranslational modification, protein turnover, chaperones)	ENOG410XRKY(COP9 (constitutive photomorphogenic) homolog, subunit 3 (Arabidopsis)		sp|Q7S7G7|CSN3_NEUCR(COP9 signalosome complex subunit 3 OS=Neurospora crassa (strain ATCC 24698 / 74-OR23-1A / CBS 708.71 / DSM 1257 / FGSC 987) OX=367110 GN=csn-3 PE=1 SV=2)
100172	estExt_Genewise1Plus.C_11_t20002	IBR domain-containing protein	2184	-2.18414	-2.70677	1.54e-11	4.57e-11	1.83943e-13	9.83936e-13	ENOG410XS1H(S:Function unknown)	ENOG410XS1H(-)	PF01485.21(IBR:IBR domain, a half RING-finger domain)	sp|P58283|RN216_MOUSE(E3 ubiquitin-protein ligase RNF216 OS=Mus musculus OX=10090 GN=Rnf216 PE=1 SV=3)
100181	estExt_Genewise1Plus.C_11_t20030	Cysteine proteinase	2397	0.593935	0.542246	2.06e-08	5.15e-08	1.56921e-12	7.94827e-12	ENOG410XQ81(O:Posttranslational modification, protein turnover, chaperones)	ENOG410XQ81(ubiquitin carboxyl-terminal hydrolase)	PF00443.29(UCH:Ubiquitin carboxyl-terminal hydrolase); PF13423.6(UCH_1:Ubiquitin carboxyl-terminal hydrolase)	sp|B8NSV5|CREB_ASPFN(Probable ubiquitin carboxyl-terminal hydrolase creB OS=Aspergillus flavus (strain ATCC 200026 / FGSC A1120 / NRRL 3357 / JCM 12722 / SRRC 167) OX=332952 GN=creB PE=3 SV=1)
100314	estExt_Genewise1Plus.C_11_t20258	HSP20-like chaperone	828	4.95659	-0.171628	0	0	4.27198e-17	2.66215e-16	ENOG410Z2YC(O:Posttranslational modification, protein turnover, chaperones); ENOG4111YTA(O:Posttranslational modification, protein turnover, chaperones)	ENOG410Z2YC(heat shock protein Hsp20 domain-containing protein); ENOG4111YTA(Heat shock protein)	PF00011.21(HSP20:Hsp20/alpha crystallin family); PF17886.1(ArsA_HSP20:HSP20-like domain found in ArsA)	sp|P19752|HSP30_NEUCR(30 kDa heat shock protein OS=Neurospora crassa (strain ATCC 24698 / 74-OR23-1A / CBS 708.71 / DSM 1257 / FGSC 987) OX=367110 GN=hsp30 PE=3 SV=1)
100375	estExt_Genewise1Plus.C_12_t10105	putative regulator of gluconeogenesis Rmd5	1388	0.52267	0.376351	7.14e-05	0.000140747	0.0030208	0.00687011	COG5109(S:Function unknown)	COG5109(Required for meiotic nuclear division 5 homolog)	PF10607.9(CLTH:CTLH/CRA C-terminal to LisH motif domain); PF13445.6(zf-RING_UBOX:RING-type zinc-finger); PF14634.6(zf-RING_5:zinc-RING finger domain); PF04641.12(Rtf2:Rtf2 RING-finger); PF14447.6(Prok-RING_4:Prokaryotic RING finger family 4); PF13920.6(zf-C3HC4_3:Zinc finger, C3HC4 type (RING finger)); PF13639.6(zf-RING_2:Ring finger domain); PF00097.25(zf-C3HC4:Zinc finger, C3HC4 type (RING fing…	sp|Q6GLP4|RMD5A_XENLA(E3 ubiquitin-protein ligase RMND5A OS=Xenopus laevis OX=8355 GN=rmnd5a PE=1 SV=1)
100677	estExt_Genewise1Plus.C_13_t10118	subtilisin-like serine protease	1680	-1.3283	2.25483	6.23e-12	1.89e-11	1.59245e-72	2.69407e-71	COG1404(S:Function unknown)	COG1404(Conserved hypothetical, protein)	PF00082.22(Peptidase_S8:Subtilase family)	sp|L8FSM5|SUB2_PSED2(Subtilisin-like protease 2 OS=Pseudogymnoascus destructans (strain ATCC MYA-4855 / 20631-21) OX=658429 GN=SP2 PE=1 SV=1)
100792	estExt_Genewise1Plus.C_13_t10324	mitochondrial processing peptidase beta subunit	1467	0.325327	-0.0516166	1.5e-32	8.71e-32	0.0981934	0.158169	COG0612(S:Function unknown)	COG0612(raffinose synthase)	PF00675.20(Peptidase_M16:Insulinase (Peptidase family M16)); PF05193.21(Peptidase_M16_C:Peptidase M16 inactive domain)	sp|P11913|MPPB_NEUCR(Mitochondrial-processing peptidase subunit beta OS=Neurospora crassa (strain ATCC 24698 / 74-OR23-1A / CBS 708.71 / DSM 1257 / FGSC 987) OX=367110 GN=pep PE=1 SV=1)
100822	estExt_Genewise1Plus.C_13_t10377	Terpenoid cyclases/Protein prenyltransferase	1926	0.921422	0.245353	1.39e-19	5.65e-19	0.0057237	0.0123842	COG5029(S:Function unknown)	COG5029(-)	PF00432.21(Prenyltrans:Prenyltransferase and squalene oxidase repeat); PF13243.6(SQHop_cyclase_C:Squalene-hopene cyclase C-terminal domain)	sp|Q8K2I1|FNTB_MOUSE(Protein farnesyltransferase subunit beta OS=Mus musculus OX=10090 GN=Fntb PE=1 SV=1)
101041	estExt_Genewise1Plus.C_14_t10166	expressed protein	915	-0.0657697	-2.06203	0.0424528	0.0611181	0	0	ENOG410Z01D(S:Function unknown)	ENOG410Z01D(Cell surface protein)
101358	estExt_Genewise1Plus.C_15_t10166	Actin-like ATPase domain-containing protein	2146	-1.46578	-0.520989	1.01e-234	2.34e-233	6.41238e-23	4.83226e-22	COG0443(G:Carbohydrate transport and metabolism); ENOG4111V5H(S:Function unknown)	COG0443(Major Facilitator superfamily); ENOG4111V5H(-)	PF00012.20(HSP70:Hsp70 protein)	sp|O43301|HS12A_HUMAN(Heat shock 70 kDa protein 12A OS=Homo sapiens OX=9606 GN=HSPA12A PE=1 SV=2)
101809	estExt_Genewise1Plus.C_16_t20040	putative RING finger ubiquitin ligase	2714	1.15187	0.228495	1.64e-27	8.47e-27	0.0148624	0.0296032	COG5540(O:Posttranslational modification, protein turnover, chaperones)	COG5540(RING finger ubiquitin ligase)	PF12678.7(zf-rbx1:RING-H2 zinc finger domain); PF00097.25(zf-C3HC4:Zinc finger, C3HC4 type (RING finger)); PF13639.6(zf-RING_2:Ring finger domain); PF13445.6(zf-RING_UBOX:RING-type zinc-finger); PF14634.6(zf-RING_5:zinc-RING finger domain); PF13923.6(zf-C3HC4_2:Zinc finger, C3HC4 type (RING finger)); PF14447.6(Prok-RING_4:Prokaryotic RING finger family 4); PF13920.6(zf-C3HC4_3:Zinc finger, C3HC4 …	sp|P36096|TUL1_YEAST(Transmembrane E3 ubiquitin-protein ligase 1 OS=Saccharomyces cerevisiae (strain ATCC 204508 / S288c) OX=559292 GN=TUL1 PE=1 SV=1)
101849	estExt_Genewise1Plus.C_16_t20107	putative aspartic endopeptidase	1594	-3.01354	-0.845511	0	0	4.97768e-13	2.61427e-12	ENOG410XNV7(S:Function unknown)	ENOG410XNV7(G-patch domain)	PF00026.23(Asp:Eukaryotic aspartyl protease); PF14543.6(TAXi_N:Xylanase inhibitor N-terminal)	sp|Q8NKB6|OPSB_ASPOR(Probable aspartic-type endopeptidase opsB OS=Aspergillus oryzae (strain ATCC 42149 / RIB 40) OX=510516 GN=opsB PE=2 SV=1)
102011	estExt_Genewise1Plus.C_17_t20018	Maleylacetoacetate isomerase	769	1.13617	-0.355175	0.0208016	0.0314996	0.259254	0.35728	COG0625(S:Function unknown)	COG0625(oxidoreductase, zinc-binding dehydrogenase family)	PF13417.6(GST_N_3:Glutathione S-transferase, N-terminal domain); PF13409.6(GST_N_2:Glutathione S-transferase, N-terminal domain); PF02798.20(GST_N:Glutathione S-transferase, N-terminal domain); PF14497.6(GST_C_3:Glutathione S-transferase, C-terminal domain); PF00043.25(GST_C:Glutathione S-transferase, C-terminal domain); PF13410.6(GST_C_2:Glutathione S-transferase, C-terminal domain)	sp|D2YW48|GST_COCIM(Probable glutathione S-transferase OS=Coccidioides immitis (strain RS) OX=246410 GN=CIMG_01314 PE=1 SV=2)
102071	estExt_Genewise1Plus.C_18_t10077	WD40 repeat-like protein	2049	0.785164	0.650672	7.88e-07	1.79e-06	2.66046e-08	1.03663e-07	COG2319(S:Function unknown)	COG2319(Conserved hypothetical, protein)	PF00400.32(WD40:WD domain, G-beta repeat); PF12894.7(ANAPC4_WD40:Anaphase-promoting complex subunit 4 WD40 domain); PF08662.11(eIF2A:Eukaryotic translation initiation factor eIF2A)	sp|Q9R1K5|FZR1_MOUSE(Fizzy-related protein homolog OS=Mus musculus OX=10090 GN=Fzr1 PE=1 SV=1)
102137	estExt_Genewise1Plus.C_18_t10182	expressed protein	2819	1.29834	-0.0234814	1.03e-131	1.58e-130	0.717694	0.783108	COG5243(O:Posttranslational modification, protein turnover, chaperones)	COG5243(zinc ion binding)	PF12678.7(zf-rbx1:RING-H2 zinc finger domain); PF13639.6(zf-RING_2:Ring finger domain); PF13445.6(zf-RING_UBOX:RING-type zinc-finger); PF13920.6(zf-C3HC4_3:Zinc finger, C3HC4 type (RING finger)); PF14634.6(zf-RING_5:zinc-RING finger domain); PF00097.25(zf-C3HC4:Zinc finger, C3HC4 type (RING finger)); PF12861.7(zf-ANAPC11:Anaphase-promoting complex subunit 11 RING-H2 finger); PF17120.5(Zn_ribbon_1…	sp|Q95SP2|HRD1_DROME(E3 ubiquitin-protein ligase HRD1 OS=Drosophila melanogaster OX=7227 GN=sip3 PE=1 SV=1)
102206	estExt_Genewise1Plus.C_18_t10329	heat shock protein 90	2511	0.466969	-1.14213	0	0	0	0	COG0326(O:Posttranslational modification, protein turnover, chaperones)	COG0326(Molecular chaperone. Has ATPase activity (By similarity))	PF00183.18(HSP90:Hsp90 protein); PF02518.26(HATPase_c:Histidine kinase-, DNA gyrase B-, and HSP90-like ATPase); PF13589.6(HATPase_c_3:Histidine kinase-, DNA gyrase B-, and HSP90-like ATPase)	sp|O43109|HSP90_PODAS(Heat shock protein 90 homolog OS=Podospora anserina OX=5145 GN=MOD-E PE=3 SV=1)
102379	estExt_Genewise1Plus.C_19_t10182	hypothetical protein	1145	1.03435	0.460207	0.000792626	0.00141539	0.0603606	0.103192
102538	estExt_Genewise1Plus.C_200050	Cysteine proteinase	1174	-0.913024	-0.44728	4.13e-14	1.38e-13	4.7953e-05	0.00013981	COG5160(S:Function unknown)	COG5160(Regulator of G protein signaling domain)	PF02902.19(Peptidase_C48:Ulp1 protease family, C-terminal catalytic domain)	sp|Q9HC62|SENP2_HUMAN(Sentrin-specific protease 2 OS=Homo sapiens OX=9606 GN=SENP2 PE=1 SV=3)
102621	estExt_Genewise1Plus.C_200223	expressed protein	2420	-0.505292	-2.64976	1.76e-26	8.78e-26	7.6901e-230	3.74548e-228	ENOG410ZQC1(S:Function unknown); ENOG4111FEQ(S:Function unknown)	ENOG410ZQC1(Conserved hypothetical, protein); ENOG4111FEQ(Protein of unknown function (DUF1399))	PF07173.12(GRDP-like:Glycine-rich domain-containing protein-like)	sp|Q9ZQ47|GRDP1_ARATH(Glycine-rich domain-containing protein 1 OS=Arabidopsis thaliana OX=3702 GN=GRDP1 PE=2 SV=1)
102669	estExt_Genewise1Plus.C_200343	putative mannosyltransferase	1895	0.662166	0.230827	0.0150407	0.0231568	0.291222	0.393139	ENOG410XYK9(S:Function unknown)	ENOG410XYK9(phosphatidylinositol glycan anchor biosynthesis, class B)	PF03901.17(Glyco_transf_22:Alg9-like mannosyltransferase family)	sp|Q4IB63|GPI10_GIBZE(GPI mannosyltransferase 3 OS=Gibberella zeae (strain PH-1 / ATCC MYA-4620 / FGSC 9075 / NRRL 31084) OX=229533 GN=GPI10 PE=3 SV=1)
102809	estExt_Genewise1Plus.C_210154	hypothetical protein	1350	2.13993	0.901874	2.13e-21	9.23e-21	4.49184e-13	2.36179e-12	COG2935(O:Posttranslational modification, protein turnover, chaperones)	COG2935(May conjugate Arg from its aminoacyl-tRNA to the N- termini of proteins containing an N-terminal aspartate or glutamate)	PF04377.15(ATE_C:Arginine-tRNA-protein transferase, C terminus); PF04376.13(ATE_N:Arginine-tRNA-protein transferase, N terminus)	sp|O14133|ATE1_SCHPO(Arginyl-tRNA--protein transferase 1 OS=Schizosaccharomyces pombe (strain 972 / ATCC 24843) OX=284812 GN=SPAC3C7.07c PE=3 SV=3)
102923	estExt_Genewise1Plus.C_210427	protein arginine N-methyltransferase	1084	-0.857232	-0.399736	2.13e-13	6.92e-13	0.00150901	0.00359998	ENOG410XQYH(G:Carbohydrate transport and metabolism)	ENOG410XQYH(Catalyzes the conversion of glucosamine-6-phosphate to glucosamine-1-phosphate (By similarity))	PF13649.6(Methyltransf_25:Methyltransferase domain); PF06325.13(PrmA:Ribosomal protein L11 methyltransferase (PrmA)); PF13847.6(Methyltransf_31:Methyltransferase domain); PF08241.12(Methyltransf_11:Methyltransferase domain); PF08003.11(Methyltransf_9:Protein of unknown function (DUF1698)); PF13489.6(Methyltransf_23:Methyltransferase domain); PF12847.7(Methyltransf_18:Methyltransferase domain); PF…	sp|Q9URX7|ANM1_SCHPO(Protein arginine N-methyltransferase 1 OS=Schizosaccharomyces pombe (strain 972 / ATCC 24843) OX=284812 GN=rmt1 PE=1 SV=2)
103000	estExt_Genewise1Plus.C_220127	hypothetical protein	2725	0.038319	0.974162	0.576504	0.633106	2.07488e-37	2.16227e-36	COG1404(S:Function unknown)	COG1404(Leucine zipper-ef-hand containing transmembrane protein)	PF00082.22(Peptidase_S8:Subtilase family); PF01483.20(P_proprotein:Proprotein convertase P-domain)	sp|P09231|KEX1A_KLULA(Protease KEX1 OS=Kluyveromyces lactis (strain ATCC 8585 / CBS 2359 / DSM 70799 / NBRC 1267 / NRRL Y-1140 / WM37) OX=284590 GN=KEX1 PE=3 SV=2)
103251	estExt_Genewise1Plus.C_230210	expressed protein	1360	-0.339404	-0.840285	1.69e-07	4e-07	1.87089e-96	3.88188e-95	ENOG4111FP9(S:Function unknown)	ENOG4111FP9(transmembrane protein 184B)	PF01822.19(WSC:WSC domain); PF03302.13(VSP:Giardia variant-specific surface protein); PF05808.11(Podoplanin:Podoplanin)
103486	estExt_Genewise1Plus.C_250171	AAA-domain containing protein	1567	0.602975	0.16523	2.24e-13	7.26e-13	0.024828	0.0471009	ENOG410XRHN(O:Posttranslational modification, protein turnover, chaperones)	ENOG410XRHN(endosome to lysosome transport via multivesicular body sorting pathway)	PF00004.29(AAA:ATPase family associated with various cellular activities (AAA)); PF09336.10(Vps4_C:Vps4 C terminal oligomerisation domain); PF04212.18(MIT:MIT (microtubule interacting and transport) domain); PF17862.1(AAA_lid_3:AAA+ lid domain); PF05496.12(RuvB_N:Holliday junction DNA helicase RuvB P-loop domain); PF06068.13(TIP49:TIP49 P-loop domain); PF13191.6(AAA_16:AAA ATPase domain); PF13479…	sp|Q5AG40|VPS4_CANAL(Vacuolar protein sorting-associated protein 4 OS=Candida albicans (strain SC5314 / ATCC MYA-2876) OX=237561 GN=VPS4 PE=2 SV=1)
103582	estExt_Genewise1Plus.C_260065	cyclophilin type peptidyl-prolyl cis-trans isomerase/CLD	1320	0.343674	-1.05554	8.1e-09	2.07e-08	1.24789e-108	2.85841e-107	COG0652(J:Translation, ribosomal structure and biogenesis)	COG0652(Hydrolyzes D-tyrosyl-tRNA(Tyr) into D-tyrosine and free tRNA(Tyr). Could be a defense mechanism against a harmful effect of D-tyrosine (By similarity))	PF00160.21(Pro_isomerase:Cyclophilin type peptidyl-prolyl cis-trans isomerase/CLD); PF07719.17(TPR_2:Tetratricopeptide repeat); PF00515.28(TPR_1:Tetratricopeptide repeat); PF13371.6(TPR_9:Tetratricopeptide repeat); PF13181.6(TPR_8:Tetratricopeptide repeat); PF13428.6(TPR_14:Tetratricopeptide repeat)	sp|Q4HXF6|PPID_GIBZE(Peptidyl-prolyl cis-trans isomerase D OS=Gibberella zeae (strain PH-1 / ATCC MYA-4620 / FGSC 9075 / NRRL 31084) OX=229533 GN=CPR6 PE=3 SV=1)
103588	estExt_Genewise1Plus.C_260071	hypothetical protein	1413	-0.858513	-0.878208	1.11e-16	4.07e-16	1.15032e-27	9.73932e-27	ENOG4111QME(S:Function unknown)	ENOG4111QME(Conserved hypothetical, protein)
103637	estExt_Genewise1Plus.C_260165	DnaJ-domain containing protein	1467	0.767207	0.128931	2.33e-52	1.87e-51	0.102495	0.1639	COG0484(S:Function unknown)	COG0484(Oxidoreductase, 2og-Fe(II) oxygenase family)	PF01556.18(DnaJ_C:DnaJ C terminal domain); PF00226.31(DnaJ:DnaJ domain); PF00684.19(DnaJ_CXXCXGXG:DnaJ central domain)	sp|P25303|SCJ1_YEAST(DnaJ-related protein SCJ1 OS=Saccharomyces cerevisiae (strain ATCC 204508 / S288c) OX=559292 GN=SCJ1 PE=1 SV=2)
103678	estExt_Genewise1Plus.C_260299	Cyclophilin-like protein	1435	0.889727	0.204982	1.37e-06	3.07e-06	0.208588	0.298989	COG0652(S:Function unknown)	COG0652(hemagglutinin protein)	PF00160.21(Pro_isomerase:Cyclophilin type peptidyl-prolyl cis-trans isomerase/CLD); PF00076.22(RRM_1:RNA recognition motif. (a.k.a. RRM, RBD, or RNP domain))	sp|Q4IE79|PPIL4_GIBZE(Peptidyl-prolyl cis-trans isomerase-like 4 OS=Gibberella zeae (strain PH-1 / ATCC MYA-4620 / FGSC 9075 / NRRL 31084) OX=229533 GN=CYP6 PE=3 SV=2)
103941	estExt_Genewise1Plus.C_280116	hypothetical protein	703	0.901739	1.2952	2.29e-279	5.89e-278	9.74264e-146	2.9953e-144	ENOG410Z0G4(O:Posttranslational modification, protein turnover, chaperones)	ENOG410Z0G4(PPIases accelerate the folding of proteins (By similarity))	PF00160.21(Pro_isomerase:Cyclophilin type peptidyl-prolyl cis-trans isomerase/CLD)	sp|Q4I5R9|PPIB_GIBZE(Peptidyl-prolyl cis-trans isomerase B OS=Gibberella zeae (strain PH-1 / ATCC MYA-4620 / FGSC 9075 / NRRL 31084) OX=229533 GN=CPR2 PE=3 SV=2)
104171	estExt_Genewise1Plus.C_290225	HCP-like protein	2382	0.423075	1.06376	0.00291588	0.00491243	2.30318e-15	1.33964e-14	COG0790(S:Function unknown)	COG0790(RING finger) protein)	PF08238.12(Sel1:Sel1 repeat)	sp|Q09897|CHR3_SCHPO(Chitin synthase regulatory factor 3 OS=Schizosaccharomyces pombe (strain 972 / ATCC 24843) OX=284812 GN=chr3 PE=1 SV=1)
104220	estExt_Genewise1Plus.C_300040	swollenin	1482	1.56272	0.546667	0	0	1.37344e-152	4.49111e-151	ENOG410XW5A(G:Carbohydrate transport and metabolism)	ENOG410XW5A(May cause loosening and extension of plant cell walls by disrupting non-covalent bonding between cellulose microfibrils and matrix glucans. No enzymatic activity has been found. May be required for rapid internodal elongation in deepwater rice during submergence (By similarity))	PF00734.18(CBM_1:Fungal cellulose binding domain); PF01357.21(Pollen_allerg_1:Pollen allergen)	sp|Q8NJ73|XYN6_MAGGR(Endo-1,4-beta-xylanase 6 OS=Magnaporthe grisea OX=148305 GN=XYL6 PE=1 SV=1)
104405	estExt_Genewise1Plus.C_320025	DUF1977-domain containing protein	1658	0.842933	0.10389	3.02e-22	1.34e-21	0.152224	0.22846	COG0484(S:Function unknown)	COG0484(Heterokaryon incompatibility protein (HET))	PF09320.11(DUF1977:Domain of unknown function (DUF1977)); PF00226.31(DnaJ:DnaJ domain)	sp|O13633|YNF5_SCHPO(Uncharacterized J domain-containing protein C17A3.05c OS=Schizosaccharomyces pombe (strain 972 / ATCC 24843) OX=284812 GN=pi041 PE=1 SV=1)
104464	estExt_Genewise1Plus.C_330027	hypothetical protein	1042	-0.0716504	0.848187	0.5126	0.580336	3.28758e-22	2.43581e-21	ENOG410XST0(U:Intracellular trafficking, secretion, and vesicular transport)	ENOG410XST0(Solute carrier family 35 member C1)	PF03151.16(TPT:Triose-phosphate Transporter family)	sp|Q9UUI8|YIY4_SCHPO(Uncharacterized transporter C22F8.04 OS=Schizosaccharomyces pombe (strain 972 / ATCC 24843) OX=284812 GN=SPAC22F8.04 PE=3 SV=1)
104488	estExt_Genewise1Plus.C_330107	Nucleotide-diphospho-sugar transferase	1278	0.811692	0.337556	8.56e-19	3.37e-18	4.86636e-05	0.000141792	COG1208(M:Cell wall/membrane/envelope biogenesis)	COG1208(nucleotidyl transferase)	PF00483.23(NTP_transferase:Nucleotidyl transferase); PF00132.24(Hexapep:Bacterial transferase hexapeptide (six repeats)); PF12804.7(NTP_transf_3:MobA-like NTP transferase domain)	sp|O60064|YBB2_SCHPO(Probable mannose-1-phosphate guanyltransferase OS=Schizosaccharomyces pombe (strain 972 / ATCC 24843) OX=284812 GN=SPBC13G1.02 PE=3 SV=1)
104564	estExt_Genewise1Plus.C_350017	Acid protease	1323	-3.20511	-1.35716	0.0103557	0.0163467	0.0120011	0.0243815	ENOG410XNV7(S:Function unknown)	ENOG410XNV7(Isoflavone reductase)	PF00026.23(Asp:Eukaryotic aspartyl protease); PF14543.6(TAXi_N:Xylanase inhibitor N-terminal)	sp|P11838|CARP_CRYPA(Endothiapepsin OS=Cryphonectria parasitica OX=5116 GN=EAPA PE=1 SV=2)
104643	estExt_Genewise1Plus.C_360010	RING/U-box	644	1.27127	0.111752	5.93e-57	5.05e-56	0.0749978	0.124512	COG5194(O:Posttranslational modification, protein turnover, chaperones)	COG5194(protein ubiquitination)	PF12678.7(zf-rbx1:RING-H2 zinc finger domain); PF12861.7(zf-ANAPC11:Anaphase-promoting complex subunit 11 RING-H2 finger); PF13639.6(zf-RING_2:Ring finger domain); PF13923.6(zf-C3HC4_2:Zinc finger, C3HC4 type (RING finger))	sp|Q9W5E1|RBX1A_DROME(RING-box protein 1A OS=Drosophila melanogaster OX=7227 GN=Roc1a PE=1 SV=1)
104804	estExt_Genewise1Plus.C_380024	expressed protein	409	0.871328	-0.557766	4.56e-17	1.7e-16	6.22004e-10	2.72152e-09	ENOG410XTCJ(S:Function unknown)	ENOG410XTCJ(tetratricopeptide repeat domain)	PF17830.1(STI1:STI1 domain)	sp|Q9USI5|STI1_SCHPO(Heat shock protein sti1 homolog OS=Schizosaccharomyces pombe (strain 972 / ATCC 24843) OX=284812 GN=sti1 PE=3 SV=1)
104918	estExt_Genewise1Plus.C_400027	Cysteine proteinase	2798	0.703908	-0.414226	1.56e-19	6.33e-19	6.05588e-11	2.83179e-10	ENOG410XSIH(O:Posttranslational modification, protein turnover, chaperones)	ENOG410XSIH(ubiquitin carboxyl-terminal hydrolase)	PF00443.29(UCH:Ubiquitin carboxyl-terminal hydrolase); PF13423.6(UCH_1:Ubiquitin carboxyl-terminal hydrolase)	sp|O94269|UBP3_SCHPO(Probable ubiquitin carboxyl-terminal hydrolase 3 OS=Schizosaccharomyces pombe (strain 972 / ATCC 24843) OX=284812 GN=ubp3 PE=3 SV=1)
104923	estExt_Genewise1Plus.C_400034	AhpC-TSA-domain containing protein	939	-0.166268	0.377078	0.102493	0.13844	0.000120123	0.000334724	COG1225(L:Replication, recombination and repair)	COG1225(a g-specific adenine glycosylase)	PF00578.21(AhpC-TSA:AhpC/TSA family); PF08534.10(Redoxin:Redoxin)	sp|O94561|PRX_SCHPO(Peroxiredoxin bcp1 OS=Schizosaccharomyces pombe (strain 972 / ATCC 24843) OX=284812 GN=bcp1 PE=1 SV=1)
105179	estExt_Genewise1Plus.C_450063	AAA-domain containing protein	1224	0.615308	0.429172	3.41e-21	1.46e-20	3.95244e-12	1.96117e-11	COG0464(K:Transcription)	COG0464(Transcription factor)	PF00004.29(AAA:ATPase family associated with various cellular activities (AAA)); PF17862.1(AAA_lid_3:AAA+ lid domain); PF13401.6(AAA_22:AAA domain); PF13173.6(AAA_14:AAA domain); PF13191.6(AAA_16:AAA ATPase domain); PF05496.12(RuvB_N:Holliday junction DNA helicase RuvB P-loop domain); PF07724.14(AAA_2:AAA domain (Cdc48 subfamily)); PF07728.14(AAA_5:AAA domain (dynein-related subfamily)); PF13238.…	sp|P28737|MSP1_YEAST(Protein MSP1 OS=Saccharomyces cerevisiae (strain ATCC 204508 / S288c) OX=559292 GN=MSP1 PE=1 SV=2)
105286	estExt_Genewise1Plus.C_560011	hypothetical protein	959	-0.0972808	0.0475914	0.28711	0.349765	0.0727154	0.121136	ENOG410YP94(S:Function unknown)	ENOG410YP94(-)
105479	estExt_Genewise1.C_1_t10414	Tubulin binding cofactor A	582	0.383982	-0.207506	5.35e-05	0.000106581	0.00362818	0.00813155	ENOG41122E4(S:Function unknown)	ENOG41122E4(Tubulin binding cofactor A)	PF02970.16(TBCA:Tubulin binding cofactor A)
105633	estExt_Genewise1.C_1_t20224	hypothetical protein	2793	-0.0340652	0.362935	0.638886	0.691532	6.83794e-07	2.3771e-06	ENOG410XX2M(S:Function unknown)	ENOG410XX2M(ADAM metallopeptidase domain)	PF13688.6(Reprolysin_5:Metallo-peptidase family M12); PF13574.6(Reprolysin_2:Metallo-peptidase family M12B Reprolysin-like); PF13583.6(Reprolysin_4:Metallo-peptidase family M12B Reprolysin-like); PF00200.23(Disintegrin:Disintegrin); PF13582.6(Reprolysin_3:Metallo-peptidase family M12B Reprolysin-like); PF17771.1(ADAM_CR_2:ADAM cysteine-rich domain); PF12273.8(RCR:Chitin synthesis regulation, resi…	sp|Q4WQ08|ADMB_ASPFU(Disintegrin and metalloproteinase domain-containing protein B OS=Neosartorya fumigata (strain ATCC MYA-4609 / Af293 / CBS 101355 / FGSC A1100) OX=330879 GN=ADM-B PE=3 SV=2)
105678	estExt_Genewise1.C_1_t20325	UCH-domain containing protein	5306	0.197228	-0.0450559	0.00218752	0.00373575	0.346354	0.454568	COG5560(O:Posttranslational modification, protein turnover, chaperones)	COG5560(ubiquitin carboxyl-terminal hydrolase)	PF00443.29(UCH:Ubiquitin carboxyl-terminal hydrolase); PF06337.12(DUSP:DUSP domain); PF13423.6(UCH_1:Ubiquitin carboxyl-terminal hydrolase)	sp|P39538|UBP12_YEAST(Ubiquitin carboxyl-terminal hydrolase 12 OS=Saccharomyces cerevisiae (strain ATCC 204508 / S288c) OX=559292 GN=UBP12 PE=1 SV=1)
106201	estExt_Genewise1.C_1_t40460	DnaJ-domain containing protein	1152	1.66742	-0.334775	1.04e-07	2.5e-07	0.22104	0.314645	ENOG410XNV5(O:Posttranslational modification, protein turnover, chaperones)	ENOG410XNV5(DnaJ (Hsp40) homolog, subfamily C, member 21)	PF00226.31(DnaJ:DnaJ domain); PF12171.8(zf-C2H2_jaz:Zinc-finger double-stranded RNA-binding); PF12874.7(zf-met:Zinc-finger of C2H2 type); PF12756.7(zf-C2H2_2:C2H2 type zinc-finger (2 copies))	sp|Q5F1R6|DJC21_HUMAN(DnaJ homolog subfamily C member 21 OS=Homo sapiens OX=9606 GN=DNAJC21 PE=1 SV=2)
106222	estExt_Genewise1.C_1_t40487	hypothetical protein	871	0.719175	-0.357764	3.61e-17	1.35e-16	2.66232e-05	7.95772e-05	ENOG410XXP2(O:Posttranslational modification, protein turnover, chaperones)	ENOG410XXP2(26S proteasome nonATPase regulatory subunit)	PF10075.9(CSN8_PSD8_EIF3K:CSN8/PSMD8/EIF3K family)	sp|P32496|RPN12_YEAST(26S proteasome regulatory subunit RPN12 OS=Saccharomyces cerevisiae (strain ATCC 204508 / S288c) OX=559292 GN=RPN12 PE=1 SV=3)
106621	estExt_Genewise1.C_1_t60319	expressed protein	1777	-0.801792	0.396783	2.26e-30	1.25e-29	1.49242e-08	5.92997e-08	COG5084(I:Lipid transport and metabolism)	COG5084(Carrier of the growing fatty acid chain in fatty acid biosynthesis (By similarity))	PF00642.24(zf-CCCH:Zinc finger C-x8-C-x5-C-x3-H type (and similar)); PF18044.1(zf-CCCH_4:CCCH-type zinc finger); PF18345.1(zf_CCCH_4:Zinc finger domain); PF16131.5(Torus:Torus domain); PF15663.5(zf-CCCH_3:Zinc-finger containing family)
107113	estExt_Genewise1.C_2_t20425	expressed protein	591	0.14347	0.222928	0.50488	0.572235	0.19663	0.28534	ENOG4111RK3(S:Function unknown); ENOG410XRXP(S:Function unknown)	ENOG4111RK3(lipase serine esterase); ENOG410XRXP(IBR domain)	PF01485.21(IBR:IBR domain, a half RING-finger domain)	sp|Q9LVX0|ARI3_ARATH(Probable E3 ubiquitin-protein ligase ARI3 OS=Arabidopsis thaliana OX=3702 GN=ARI3 PE=2 SV=1)
107533	estExt_Genewise1.C_2_t40224	oligosaccharyl transferase STT3 subunit	2352	1.50566	0.576448	0	0	1.16471e-28	1.00825e-27	COG1287(S:Function unknown)	COG1287(oligosaccharyl transferase STT3 subunit)	PF02516.14(STT3:Oligosaccharyl transferase STT3 subunit)	sp|P39007|STT3_YEAST(Dolichyl-diphosphooligosaccharide--protein glycosyltransferase subunit STT3 OS=Saccharomyces cerevisiae (strain ATCC 204508 / S288c) OX=559292 GN=STT3 PE=1 SV=2)
107707	estExt_Genewise1.C_3_t10034	hypothetical protein	1084	0.999477	0.476864	4.95e-92	5.98e-91	1.53145e-15	8.96396e-15	ENOG410XR1F(U:Intracellular trafficking, secretion, and vesicular transport)	ENOG410XR1F(tumor suppressor candidate 3)	PF04756.13(OST3_OST6:OST3 / OST6 family, transporter family)	sp|Q13454|TUSC3_HUMAN(Tumor suppressor candidate 3 OS=Homo sapiens OX=9606 GN=TUSC3 PE=1 SV=1)
107767	estExt_Genewise1.C_3_t10182	thioredoxin	1075	1.44975	0.397148	1.34e-114	1.89e-113	6.07358e-10	2.66122e-09	ENOG410YQ2G(S:Function unknown)	ENOG410YQ2G(CorA-like Mg2+ transporter protein)	PF06201.13(PITH:PITH domain); PF00085.20(Thioredoxin:Thioredoxin); PF13098.6(Thioredoxin_2:Thioredoxin-like domain); PF13905.6(Thioredoxin_8:Thioredoxin-like); PF04756.13(OST3_OST6:OST3 / OST6 family, transporter family)	sp|Q9USR1|TXL1_SCHPO(Thioredoxin-like protein 1 OS=Schizosaccharomyces pombe (strain 972 / ATCC 24843) OX=284812 GN=txl1 PE=4 SV=1)
107772	estExt_Genewise1.C_3_t10195	DnaJ-domain containing protein	1031	-0.00666715	0.266594	0.898192	0.92404	0.00106565	0.00259786	COG0484(S:Function unknown)	COG0484(-)	PF00226.31(DnaJ:DnaJ domain)	sp|Q9Y7T9|YCJD_SCHPO(Uncharacterized J domain-containing protein C63.13 OS=Schizosaccharomyces pombe (strain 972 / ATCC 24843) OX=284812 GN=SPCC63.13 PE=3 SV=1)
107938	estExt_Genewise1.C_3_t20019	hypothetical protein	1326	1.92897	0.474714	3.04e-26	1.5e-25	1.75702e-05	5.36794e-05	ENOG410XPDE(O:Posttranslational modification, protein turnover, chaperones)	ENOG410XPDE(protein deneddylation)	PF01399.27(PCI:PCI domain)	sp|Q7S0P8|CSN4_NEUCR(COP9 signalosome complex subunit 4 OS=Neurospora crassa (strain ATCC 24698 / 74-OR23-1A / CBS 708.71 / DSM 1257 / FGSC 987) OX=367110 GN=csn-4 PE=1 SV=1)
108079	estExt_Genewise1.C_3_t20400	T-complex protein 1 subunit alpha	1754	0.803605	0.406262	1.18e-44	8.47e-44	4.47744e-19	3.03547e-18	COG0459(C:Energy production and conversion)	COG0459(Component of the ubiquinol-cytochrome c reductase complex (complex III or cytochrome b-c1 complex), which is a respiratory chain that generates an electrochemical potential coupled to ATP synthesis (By similarity))	PF00118.24(Cpn60_TCP1:TCP-1/cpn60 chaperonin family)	sp|O94501|TCPA_SCHPO(T-complex protein 1 subunit alpha OS=Schizosaccharomyces pombe (strain 972 / ATCC 24843) OX=284812 GN=cct1 PE=3 SV=1)
108286	estExt_Genewise1.C_3_t30457	aminopeptidase 2	2949	1.40114	-0.00434444	7.59e-91	9.09e-90	0.927488	0.955575	COG0308(E:Amino acid transport and metabolism)	COG0308(aminopeptidase)	PF11838.8(ERAP1_C:ERAP1-like C-terminal domain); PF01433.20(Peptidase_M1:Peptidase family M1 domain); PF17900.1(Peptidase_M1_N:Peptidase M1 N-terminal domain)	sp|P32454|APE2_YEAST(Aminopeptidase 2, mitochondrial OS=Saccharomyces cerevisiae (strain ATCC 204508 / S288c) OX=559292 GN=APE2 PE=1 SV=4)
108575	estExt_Genewise1.C_4_t20209	putative DnaJ domain protein	1775	0.539768	-0.0512727	5.58e-13	1.77e-12	0.417808	0.527116	COG0484(S:Function unknown)	COG0484(Neutrophil cytosolic factor 2)	PF01556.18(DnaJ_C:DnaJ C terminal domain); PF00226.31(DnaJ:DnaJ domain); PF00684.19(DnaJ_CXXCXGXG:DnaJ central domain)	sp|O94657|XDJ1_SCHPO(DnaJ protein homolog xdj1 OS=Schizosaccharomyces pombe (strain 972 / ATCC 24843) OX=284812 GN=xdj1 PE=3 SV=1)
108627	estExt_Genewise1.C_4_t20332	T-complex protein 1 subunit gamma	2027	1.29853	0.250708	1.69e-99	2.16e-98	1.86515e-07	6.81948e-07	COG0459(O:Posttranslational modification, protein turnover, chaperones)	COG0459(Prevents misfolding and promotes the refolding and proper assembly of unfolded polypeptides generated under stress conditions (By similarity))	PF00118.24(Cpn60_TCP1:TCP-1/cpn60 chaperonin family)	sp|O74341|TCPG_SCHPO(T-complex protein 1 subunit gamma OS=Schizosaccharomyces pombe (strain 972 / ATCC 24843) OX=284812 GN=cct3 PE=1 SV=1)
108701	estExt_Genewise1.C_4_t20444	14-3-3-like protein	1212	-0.556683	-0.267072	7.05e-130	1.08e-128	1.695e-37	1.77439e-36	COG5040(T:Signal transduction mechanisms)	COG5040(Tyrosine 3-monooxygenase tryptophan 5-monooxygenase activation protein)	PF00244.20(14-3-3:14-3-3 protein)	sp|Q99002|1433_TRIHA(14-3-3 protein homolog OS=Trichoderma harzianum OX=5544 PE=2 SV=1)
109980	estExt_Genewise1.C_7_t20032	hypothetical protein	1041	0.197393	-0.190708	0.378238	0.448961	0.360242	0.468542	ENOG4111ZYV(O:Posttranslational modification, protein turnover, chaperones); ENOG41121N2(O:Posttranslational modification, protein turnover, chaperones)	ENOG4111ZYV(RING finger domain protein); ENOG41121N2(zinc ion binding)	PF13639.6(zf-RING_2:Ring finger domain); PF13920.6(zf-C3HC4_3:Zinc finger, C3HC4 type (RING finger)); PF00097.25(zf-C3HC4:Zinc finger, C3HC4 type (RING finger)); PF13923.6(zf-C3HC4_2:Zinc finger, C3HC4 type (RING finger)); PF12678.7(zf-rbx1:RING-H2 zinc finger domain)	sp|O60117|YH73_SCHPO(Uncharacterized RING finger protein C16G5.03 OS=Schizosaccharomyces pombe (strain 972 / ATCC 24843) OX=284812 GN=SPBC16G5.03 PE=4 SV=1)
110113	estExt_Genewise1.C_7_t20368	T-complex protein 1 subunit eta	1845	0.733245	0.215912	5.83e-34	3.5e-33	0.000108768	0.000304367	COG0459(S:Function unknown)	COG0459(-)	PF00118.24(Cpn60_TCP1:TCP-1/cpn60 chaperonin family)	sp|P87153|TCPH_SCHPO(Probable T-complex protein 1 subunit eta OS=Schizosaccharomyces pombe (strain 972 / ATCC 24843) OX=284812 GN=cct7 PE=1 SV=1)
110295	estExt_Genewise1.C_7_t30176	serine palmitoyltransferase 1	1699	0.50427	0.0729819	9.56e-20	3.9e-19	0.102157	0.163415	COG0156(S:Function unknown)	COG0156(glycosylphosphatidylinositol anchor attachment protein 1 homolog (yeast))	PF00155.21(Aminotran_1_2:Aminotransferase class I and II); PF01053.20(Cys_Met_Meta_PP:Cys/Met metabolism PLP-dependent enzyme)	sp|O59682|LCB1_SCHPO(Serine palmitoyltransferase 1 OS=Schizosaccharomyces pombe (strain 972 / ATCC 24843) OX=284812 GN=lcb1 PE=3 SV=1)
110693	estExt_Genewise1.C_8_t20217	putative aminopeptidase	3262	1.27411	0.252208	1.6e-176	3.04e-175	1.02811e-09	4.43965e-09	COG0308(S:Function unknown)	COG0308(t-complex 11)	PF01433.20(Peptidase_M1:Peptidase family M1 domain); PF11838.8(ERAP1_C:ERAP1-like C-terminal domain); PF17900.1(Peptidase_M1_N:Peptidase M1 N-terminal domain)	sp|P32454|APE2_YEAST(Aminopeptidase 2, mitochondrial OS=Saccharomyces cerevisiae (strain ATCC 204508 / S288c) OX=559292 GN=APE2 PE=1 SV=4)
111063	estExt_Genewise1.C_9_t20115	Zn-dependent exopeptidase	1631	-0.202062	-0.210302	0.00256972	0.00435177	0.000210348	0.000571174	COG2234(G:Carbohydrate transport and metabolism)	COG2234(SV2 related protein homolog)	PF04389.17(Peptidase_M28:Peptidase family M28); PF02225.22(PA:PA domain); PF01546.28(Peptidase_M20:Peptidase family M20/M25/M40)	sp|P37302|APE3_YEAST(Aminopeptidase Y OS=Saccharomyces cerevisiae (strain ATCC 204508 / S288c) OX=559292 GN=APE3 PE=1 SV=1)
111088	estExt_Genewise1.C_9_t20205	Zn-dependent exopeptidase	1704	-4.01749	-0.95109	3.2e-22	1.42e-21	0.481564	0.589392	COG2234(S:Function unknown)	COG2234(-)	PF04389.17(Peptidase_M28:Peptidase family M28); PF02225.22(PA:PA domain); PF01546.28(Peptidase_M20:Peptidase family M20/M25/M40)	sp|Q5QHG6|LAP2_TRIRU(Leucine aminopeptidase 2 OS=Trichophyton rubrum OX=5551 GN=LAP2 PE=1 SV=1)
111096	estExt_Genewise1.C_9_t20219	expressed protein	961	1.22284	-0.135069	0	0	1.68252e-35	1.69055e-34	ENOG4111CG9(S:Function unknown)	ENOG4111CG9(-)
111204	estExt_Genewise1.C_10_t10153	Pre protein translocase subunit	2535	0.267063	0.556047	4.21e-14	1.41e-13	1.14537e-31	1.07063e-30	COG5407(U:Intracellular trafficking, secretion, and vesicular transport)	COG5407(translocation protein SEC63)	PF00226.31(DnaJ:DnaJ domain); PF02889.16(Sec63:Sec63 Brl domain)	sp|Q9HGN7|SEC63_SCHPO(Translocation protein sec63 OS=Schizosaccharomyces pombe (strain 972 / ATCC 24843) OX=284812 GN=sec63 PE=1 SV=1)
111661	estExt_Genewise1.C_11_t10254	hypothetical protein	1465	1.45326	0.512043	6.22e-14	2.06e-13	0.000459116	0.00118182	ENOG41124H6(S:Function unknown)	ENOG41124H6(GPI anchored protein)
111778	estExt_Genewise1.C_11_t10468	protein disulphide isomerase	1711	0.919215	0.647034	0	0	2.7719e-77	4.95196e-76	COG0526(A:RNA processing and modification); COG1902(C:Energy production and conversion)	COG0526(PRP39 pre-mRNA processing factor 39 homolog (S. cerevisiae)); COG1902(NADH flavin oxidoreductase, NADH oxidase)	PF00085.20(Thioredoxin:Thioredoxin); PF13848.6(Thioredoxin_6:Thioredoxin-like domain); PF01216.17(Calsequestrin:Calsequestrin); PF13899.6(Thioredoxin_7:Thioredoxin-like); PF04756.13(OST3_OST6:OST3 / OST6 family, transporter family); PF08534.10(Redoxin:Redoxin)	sp|P55059|PDI_HUMIN(Protein disulfide-isomerase OS=Humicola insolens OX=34413 PE=1 SV=1)
111938	estExt_Genewise1.C_11_t20260	N-terminal nucleophile aminohydrolases (Ntn hydrolases)	845	1.26801	0.31095	3.97e-84	4.48e-83	1.46726e-07	5.41605e-07	COG0638(S:Function unknown)	COG0638(Conserved hypothetical, protein)	PF00227.26(Proteasome:Proteasome subunit)	sp|P23724|PSB6_YEAST(Proteasome subunit beta type-6 OS=Saccharomyces cerevisiae (strain ATCC 204508 / S288c) OX=559292 GN=PRE7 PE=1 SV=1)
111963	estExt_Genewise1.C_12_t10019	ubiquitin-domain containing protein	1582	-0.0858421	-0.37047	0.0661958	0.0921847	6.5672e-16	3.9259e-15	COG5272(D:Cell cycle control, cell division, chromosome partitioning)	COG5272(Maf-like protein)	PF00240.23(ubiquitin:Ubiquitin family); PF00627.31(UBA:UBA/TS-N domain); PF11976.8(Rad60-SLD:Ubiquitin-2 like Rad60 SUMO-like); PF10302.9(DUF2407:DUF2407 ubiquitin-like domain)	sp|Q10169|DSK2_SCHPO(Deubiquitination-protection protein dph1 OS=Schizosaccharomyces pombe (strain 972 / ATCC 24843) OX=284812 GN=dph1 PE=4 SV=1)
112324	estExt_Genewise1.C_13_t10153	Protein PNG1	1601	-0.473875	-0.761489	2.65e-11	7.8e-11	3.61688e-30	3.25907e-29	ENOG410XP69(O:Posttranslational modification, protein turnover, chaperones)	ENOG410XP69(Specifically deglycosylates the denatured form of N- linked glycoproteins in the cytoplasm and assists their proteasome-mediated degradation. Cleaves the beta-aspartyl- glucosamine (GlcNAc) of the glycan and the amide side chain of Asn, converting Asn to Asp. Prefers proteins containing high- mannose over those bearing complex type oligosaccharides. Can recognize misfolded proteins in…	PF03835.15(Rad4:Rad4 transglutaminase-like domain); PF01841.19(Transglut_core:Transglutaminase-like superfamily)	sp|Q4IR87|PNG1_GIBZE(Protein PNG1 OS=Gibberella zeae (strain PH-1 / ATCC MYA-4620 / FGSC 9075 / NRRL 31084) OX=229533 GN=PNG1 PE=3 SV=1)
112574	estExt_Genewise1.C_13_t20129	proteasome regulatory particle%2C non-ATPase-like protein	1511	1.12935	0.0608812	1.27e-70	1.26e-69	0.282688	0.38324	COG5187(O:Posttranslational modification, protein turnover, chaperones)	COG5187(Proteasome (Prosome, macropain) 26S subunit, non-ATPase, 6)	PF10602.9(RPN7:26S proteasome subunit RPN7); PF01399.27(PCI:PCI domain)	sp|Q10335|RPN7_SCHPO(Probable 26S proteasome regulatory subunit rpn7 OS=Schizosaccharomyces pombe (strain 972 / ATCC 24843) OX=284812 GN=rpn7 PE=2 SV=1)
112677	estExt_Genewise1.C_14_t10186	UBC-like protein	785	0.0909675	-0.232357	0.269212	0.329901	0.00309892	0.00703567	ENOG4111MDW(O:Posttranslational modification, protein turnover, chaperones)	ENOG4111MDW(ubiquitin-conjugating enzyme)	PF00179.26(UQ_con:Ubiquitin-conjugating enzyme)	sp|O74983|MMS2_SCHPO(Ubiquitin-conjugating enzyme spm2 OS=Schizosaccharomyces pombe (strain 972 / ATCC 24843) OX=284812 GN=spm2 PE=1 SV=1)
112807	estExt_Genewise1.C_14_t10414	Metalloproteases ("zincins")	2183	2.25741	0.156255	4.08e-116	5.81e-115	0.025811	0.048726	COG0339(S:Function unknown)	COG0339(Conserved hypothetical, protein)	PF01432.20(Peptidase_M3:Peptidase family M3)	sp|P25375|PRTD_YEAST(Saccharolysin OS=Saccharomyces cerevisiae (strain ATCC 204508 / S288c) OX=559292 GN=PRD1 PE=1 SV=1)
113023	estExt_Genewise1.C_15_t10250	putative cytochrome c oxidase assembly protein	592	0.83829	0.0678623	1.07e-13	3.5e-13	0.601376	0.685108	ENOG4111YIY(O:Posttranslational modification, protein turnover, chaperones)	ENOG4111YIY(Cytochrome c oxidase assembly factor 5)	PF10203.9(Pet191_N:Cytochrome c oxidase assembly protein PET191)	sp|Q02772|PT191_YEAST(Mitochondrial protein PET191 OS=Saccharomyces cerevisiae (strain ATCC 204508 / S288c) OX=559292 GN=PET191 PE=1 SV=1)
113088	estExt_Genewise1.C_15_t10402	heat shock protein	3149	8.59e-05	-1.05514	0.806842	0.840879	0	0	COG0542(O:Posttranslational modification, protein turnover, chaperones)	COG0542(ATP-dependent CLP protease ATP-binding subunit)	PF07724.14(AAA_2:AAA domain (Cdc48 subfamily)); PF17871.1(AAA_lid_9:AAA lid domain); PF00004.29(AAA:ATPase family associated with various cellular activities (AAA)); PF10431.9(ClpB_D2-small:C-terminal, D2-small domain, of ClpB protein); PF07728.14(AAA_5:AAA domain (dynein-related subfamily)); PF13401.6(AAA_22:AAA domain); PF13191.6(AAA_16:AAA ATPase domain); PF00158.26(Sigma54_activat:Sigma-54 in…	sp|P31540|HSP98_NEUCR(Heat shock protein hsp98 OS=Neurospora crassa (strain ATCC 24698 / 74-OR23-1A / CBS 708.71 / DSM 1257 / FGSC 987) OX=367110 GN=hsp98 PE=1 SV=2)
113508	estExt_Genewise1.C_17_t10045	putative proteasome subunit alpha type 2	868	1.30978	0.233464	1.76e-74	1.82e-73	5.97976e-05	0.000171906	ENOG410XPQ8(O:Posttranslational modification, protein turnover, chaperones)	ENOG410XPQ8(The proteasome is a multicatalytic proteinase complex which is characterized by its ability to cleave peptides with Arg, Phe, Tyr, Leu, and Glu adjacent to the leaving group at neutral or slightly basic pH. The proteasome has an ATP-dependent proteolytic activity (By similarity))	PF00227.26(Proteasome:Proteasome subunit); PF10584.9(Proteasome_A_N:Proteasome subunit A N-terminal signature)	sp|Q8X077|PSA2_NEUCR(Probable proteasome subunit alpha type-2 OS=Neurospora crassa (strain ATCC 24698 / 74-OR23-1A / CBS 708.71 / DSM 1257 / FGSC 987) OX=367110 GN=pca-2 PE=3 SV=1)
113588	estExt_Genewise1.C_17_t10345	Cytochrome c and c1 haem-lyase	1104	1.65763	0.219951	1.98e-20	8.29e-20	0.142539	0.215919	ENOG410YAUW(S:Function unknown)	ENOG410YAUW(Chromosome 16 open reading frame 58)	PF01265.17(Cyto_heme_lyase:Cytochrome c/c1 heme lyase)	sp|O13962|YE42_SCHPO(Putative cytochrome c1 heme lyase OS=Schizosaccharomyces pombe (strain 972 / ATCC 24843) OX=284812 GN=SPAC24C9.02c PE=3 SV=1)
113889	estExt_Genewise1.C_18_t10465	proteasome regulatory particle subunit Rpt2	1500	1.1182	-0.0713298	2.06e-103	2.7e-102	0.143642	0.217271	COG1222(B:Chromatin structure and dynamics); COG1222(K:Transcription)	COG1222(Histone acetyltransferase); COG1222(Histone acetyltransferase)	PF00004.29(AAA:ATPase family associated with various cellular activities (AAA)); PF16450.5(Prot_ATP_ID_OB:Proteasomal ATPase OB C-terminal domain); PF17862.1(AAA_lid_3:AAA+ lid domain); PF07724.14(AAA_2:AAA domain (Cdc48 subfamily)); PF13401.6(AAA_22:AAA domain); PF05673.13(DUF815:Protein of unknown function (DUF815)); PF07728.14(AAA_5:AAA domain (dynein-related subfamily)); PF13191.6(AAA_16:AAA …	sp|P36612|PRS4_SCHPO(26S proteasome regulatory subunit 4 homolog OS=Schizosaccharomyces pombe (strain 972 / ATCC 24843) OX=284812 GN=mts2 PE=2 SV=1)
114225	estExt_Genewise1.C_200190	ubiquitin hydrolase L3	815	1.77787	-0.253999	5.41e-56	4.56e-55	0.035222	0.0640488	ENOG4111HNA(S:Function unknown)	ENOG4111HNA(Actin-interacting protein)	PF01088.21(Peptidase_C12:Ubiquitin carboxyl-terminal hydrolase, family 1)	sp|Q2TBG8|UCHL3_BOVIN(Ubiquitin carboxyl-terminal hydrolase isozyme L3 OS=Bos taurus OX=9913 GN=UCHL3 PE=2 SV=1)
114362	estExt_Genewise1.C_210028	WD40 repeat-like protein	2001	1.07744	0.177521	6.16e-24	2.87e-23	0.130488	0.200687	COG2319(U:Intracellular trafficking, secretion, and vesicular transport); ENOG410XSDT(S:Function unknown)	COG2319(SNARE complex subunit); ENOG410XSDT(WD domain, G-beta repeat)	PF12894.7(ANAPC4_WD40:Anaphase-promoting complex subunit 4 WD40 domain); PF00400.32(WD40:WD domain, G-beta repeat)	sp|Q09786|YA98_SCHPO(Uncharacterized WD repeat-containing protein C13G6.08 OS=Schizosaccharomyces pombe (strain 972 / ATCC 24843) OX=284812 GN=SPAC13G6.08 PE=3 SV=1)
114486	estExt_Genewise1.C_210277	HSP20-like chaperone	786	0.0519001	-0.39782	0.276086	0.337599	1.36284e-22	1.01871e-21	ENOG41121RT(S:Function unknown)	ENOG41121RT(Prostaglandin E synthase 3 (Cytosolic))	PF04969.16(CS:CS domain)	sp|Q11118|WOS2_SCHPO(Protein wos2 OS=Schizosaccharomyces pombe (strain 972 / ATCC 24843) OX=284812 GN=wos2 PE=2 SV=1)
114783	estExt_Genewise1.C_230029	26S proteasome non-ATPase regulatory subunit 12	1663	1.33915	-0.0229113	6.99e-90	8.28e-89	0.698974	0.768299	COG5071(O:Posttranslational modification, protein turnover, chaperones)	COG5071(26S proteasome non-ATPase regulatory subunit)	PF01399.27(PCI:PCI domain); PF18098.1(RPN5_C:26S proteasome regulatory subunit RPN5 C-terminal domain)	sp|Q9D8W5|PSD12_MOUSE(26S proteasome non-ATPase regulatory subunit 12 OS=Mus musculus OX=10090 GN=Psmd12 PE=1 SV=4)
115284	estExt_Genewise1.C_260256	glutaredoxin homolog	595	1.39221	0.485836	8.15e-81	8.88e-80	9.52876e-13	4.90156e-12	COG0278(S:Function unknown)	COG0278(amidohydrolase)	PF00462.24(Glutaredoxin:Glutaredoxin)	sp|Q02784|GLRX5_YEAST(Monothiol glutaredoxin-5, mitochondrial OS=Saccharomyces cerevisiae (strain ATCC 204508 / S288c) OX=559292 GN=GRX5 PE=1 SV=1)
115969	estExt_Genewise1.C_310062	glutaredoxin	584	1.46277	-0.267269	3.33e-195	6.74e-194	4.36762e-07	1.54149e-06	COG0695(O:Posttranslational modification, protein turnover, chaperones)	COG0695(Glutaredoxin)	PF00462.24(Glutaredoxin:Glutaredoxin); PF13098.6(Thioredoxin_2:Thioredoxin-like domain); PF00085.20(Thioredoxin:Thioredoxin); PF14595.6(Thioredoxin_9:Thioredoxin); PF01323.20(DSBA:DSBA-like thioredoxin domain)	sp|O81187|GLRX_VERFO(Glutaredoxin OS=Vernicia fordii OX=73154 PE=3 SV=1)
116173	estExt_Genewise1.C_340148	Ankyrin	670	0.550987	0.341226	0.0564974	0.0797384	0.116902	0.1828	COG0666(K:Transcription)	COG0666(C6 transcription factor)	PF12796.7(Ank_2:Ankyrin repeats (3 copies)); PF13606.6(Ank_3:Ankyrin repeat); PF13637.6(Ank_4:Ankyrin repeats (many copies)); PF00023.30(Ank:Ankyrin repeat); PF13857.6(Ank_5:Ankyrin repeats (many copies))
116761	estExt_Genewise1.C_450017	heat shock protein	2564	0.246968	-0.774181	6.24e-17	2.31e-16	2.70938e-150	8.5281e-149	COG0443(J:Translation, ribosomal structure and biogenesis)	COG0443(One of the essential components for the initiation of protein synthesis. Protects formylmethionyl-tRNA from spontaneous hydrolysis and promotes its binding to the 30S ribosomal subunits. Also involved in the hydrolysis of GTP during the formation of the 70S ribosomal complex (By similarity))	PF00012.20(HSP70:Hsp70 protein); PF06723.13(MreB_Mbl:MreB/Mbl protein)	sp|O74225|HSP88_NEUCR(Heat shock protein hsp88 OS=Neurospora crassa (strain ATCC 24698 / 74-OR23-1A / CBS 708.71 / DSM 1257 / FGSC 987) OX=367110 GN=hsp88 PE=1 SV=1)
117739	fgenesh2_kg.2_#_290_#_gi|38352269|gb|CF932450.1|CF932450	Dolichol phosphate-mannose biosynthesis regulatory	405	0.452052	0.578954	0.000551614	0.0010013	0.000561544	0.00142958	ENOG41122UH(S:Function unknown)	ENOG41122UH(dolichyl-phosphate beta-D-mannosyltransferase activity)	PF07297.12(DPM2:Dolichol phosphate-mannose biosynthesis regulatory protein (DPM2))	sp|Q556K9|DPM2_DICDI(Dolichol phosphate-mannose biosynthesis regulatory protein OS=Dictyostelium discoideum OX=44689 GN=dpm2-1 PE=3 SV=1)
117743	fgenesh2_kg.2_#_294_#_gi|30123413|gb|CB908755.1|CB908755	hypothetical protein	565	0.772286	0.203275	3.26e-12	1e-11	0.0686792	0.115221	COG2214(S:Function unknown)	COG2214(Protein of unknown function (DUF3602))	PF03656.13(Pam16:Pam16); PF00226.31(DnaJ:DnaJ domain)	sp|Q4I7T5|TIM14_GIBZE(Mitochondrial import inner membrane translocase subunit TIM14 OS=Gibberella zeae (strain PH-1 / ATCC MYA-4620 / FGSC 9075 / NRRL 31084) OX=229533 GN=PAM18 PE=3 SV=1)
119024	fgenesh2_kg.9_#_40_#_gi|38136271|gb|CF881589.1|CF881589	glutaredoxin homolog	351	1.03067	0.331437	4.08e-05	8.2e-05	0.133051	0.204121	COG0278(O:Posttranslational modification, protein turnover, chaperones)	COG0278(Glutaredoxin)	PF00462.24(Glutaredoxin:Glutaredoxin)	sp|O74790|GLRX4_SCHPO(Monothiol glutaredoxin-4 OS=Schizosaccharomyces pombe (strain 972 / ATCC 24843) OX=284812 GN=grx4 PE=1 SV=1)
121541	estExt_fgenesh2_kg.C_1_t10152	E3 ubiquitin ligase SCF complex%2C Skp subunit	588	-0.048013	0.261235	0.318414	0.383899	3.73206e-09	1.54872e-08	COG5201(O:Posttranslational modification, protein turnover, chaperones)	COG5201(ubiquitin-dependent protein catabolic process)	PF01466.19(Skp1:Skp1 family, dimerisation domain); PF03931.15(Skp1_POZ:Skp1 family, tetramerisation domain)	sp|Q8NK13|SKP1_NEUCR(E3 ubiquitin ligase complex SCF subunit scon-3 OS=Neurospora crassa (strain ATCC 24698 / 74-OR23-1A / CBS 708.71 / DSM 1257 / FGSC 987) OX=367110 GN=scon-3 PE=1 SV=1)
121869	estExt_fgenesh2_kg.C_1_t10495	Protein-L-isoaspartate(D-aspartate) O-methyltransferase	908	1.30218	0.09998	8.48e-10	2.32e-09	0.433332	0.541606	COG2518(O:Posttranslational modification, protein turnover, chaperones)	COG2518(Catalyzes the methyl esterification of L-isoaspartyl residues in peptides and proteins that result from spontaneous decomposition of normal L-aspartyl and L-asparaginyl residues. It plays a role in the repair and or degradation of damaged proteins (By similarity))	PF01135.19(PCMT:Protein-L-isoaspartate(D-aspartate) O-methyltransferase (PCMT)); PF13847.6(Methyltransf_31:Methyltransferase domain); PF13679.6(Methyltransf_32:Methyltransferase domain)	sp|P23506|PIMT_MOUSE(Protein-L-isoaspartate(D-aspartate) O-methyltransferase OS=Mus musculus OX=10090 GN=Pcmt1 PE=1 SV=3)
121926	estExt_fgenesh2_kg.C_20043	heat shock protein 70 kDa	2292	0.386224	-0.93664	0	0	0	0	COG0443(S:Function unknown)	COG0443(Protein of unknown function (DUF3128))	PF00012.20(HSP70:Hsp70 protein); PF06723.13(MreB_Mbl:MreB/Mbl protein)	sp|Q01233|HSP70_NEUCR(Heat shock 70 kDa protein OS=Neurospora crassa (strain ATCC 24698 / 74-OR23-1A / CBS 708.71 / DSM 1257 / FGSC 987) OX=367110 GN=hsps-1 PE=2 SV=2)
122251	estExt_fgenesh2_kg.C_20384	small heat shock protein	832	1.97434	-0.00786909	0	0	0.775386	0.831355	ENOG4111YTA(O:Posttranslational modification, protein turnover, chaperones)	ENOG4111YTA(Heat shock protein)	PF00011.21(HSP20:Hsp20/alpha crystallin family); PF17886.1(ArsA_HSP20:HSP20-like domain found in ArsA)	sp|P19752|HSP30_NEUCR(30 kDa heat shock protein OS=Neurospora crassa (strain ATCC 24698 / 74-OR23-1A / CBS 708.71 / DSM 1257 / FGSC 987) OX=367110 GN=hsp30 PE=3 SV=1)
122545	estExt_fgenesh2_kg.C_40083	carboxypeptidase Y precursor	1774	0.52064	-0.223163	1.57e-43	1.11e-42	1.04359e-16	6.41685e-16	COG2939(I:Lipid transport and metabolism)	COG2939(fatty acid elongase)	PF00450.22(Peptidase_S10:Serine carboxypeptidase); PF05388.11(Carbpep_Y_N:Carboxypeptidase Y pro-peptide)	sp|C7YQJ2|CBPYA_NECH7(Carboxypeptidase Y homolog A OS=Nectria haematococca (strain 77-13-4 / ATCC MYA-4622 / FGSC 9596 / MPVI) OX=660122 GN=CPYA PE=3 SV=1)
122594	estExt_fgenesh2_kg.C_40138	DnaJ domain-containing protein	1451	0.579307	-0.556667	7.38e-121	1.08e-119	2.59742e-148	8.09311e-147	COG0484(D:Cell cycle control, cell division, chromosome partitioning)	COG0484(Noc1p protein)	PF01556.18(DnaJ_C:DnaJ C terminal domain); PF00226.31(DnaJ:DnaJ domain); PF00684.19(DnaJ_CXXCXGXG:DnaJ central domain)	sp|O74752|MAS5_SCHPO(Mitochondrial protein import protein mas5 OS=Schizosaccharomyces pombe (strain 972 / ATCC 24843) OX=284812 GN=mas5 PE=3 SV=1)
123565	estExt_fgenesh2_kg.C_100100	HSP20-like chaperone	1388	0.801201	-2.48947	0	0	0	0	ENOG4111YTA(O:Posttranslational modification, protein turnover, chaperones)	ENOG4111YTA(Heat shock protein)	PF00011.21(HSP20:Hsp20/alpha crystallin family); PF17886.1(ArsA_HSP20:HSP20-like domain found in ArsA)	sp|P19752|HSP30_NEUCR(30 kDa heat shock protein OS=Neurospora crassa (strain ATCC 24698 / 74-OR23-1A / CBS 708.71 / DSM 1257 / FGSC 987) OX=367110 GN=hsp30 PE=3 SV=1)
123681	estExt_fgenesh2_kg.C_110092	14-3-3-like protein	1351	-0.0285324	-0.00358753	0.189686	0.242691	0.827118	0.872666	COG5040(S:Function unknown)	COG5040(-)	PF00244.20(14-3-3:14-3-3 protein)	sp|B8NLM9|ARTA_ASPFN(14-3-3 family protein artA OS=Aspergillus flavus (strain ATCC 200026 / FGSC A1120 / NRRL 3357 / JCM 12722 / SRRC 167) OX=332952 GN=artA PE=3 SV=1)
123899	estExt_fgenesh2_kg.C_130062	ubiquitin family protein	1225	-0.0280575	0.129106	0.00544992	0.00889074	1.68878e-42	1.91051e-41	COG5272(S:Function unknown)	COG5272(C6 finger domain protein)	PF00240.23(ubiquitin:Ubiquitin family); PF11976.8(Rad60-SLD:Ubiquitin-2 like Rad60 SUMO-like); PF14560.6(Ubiquitin_2:Ubiquitin-like domain)	sp|P0CG74|UBI4P_CANAX(Polyubiquitin OS=Candida albicans OX=5476 GN=UBI4 PE=1 SV=1)
124246	estExt_fgenesh2_kg.C_160092	Hsp70 nucleotide exchange factor	847	3.90856	0.179401	0	0	7.02022e-06	2.24018e-05	ENOG4111ZH4(K:Transcription); ENOG4111PX3(K:Transcription)	ENOG4111ZH4(Functions as a nucleotide exchange factor (NEF) for Hsp70 chaperones which accelerates the release of ADP. Required for fully efficient Hsp70-mediated folding of proteins (By similarity)); ENOG4111PX3(Functions as a nucleotide exchange factor (NEF) for Hsp70 chaperones which accelerates the release of ADP. Required for fully efficient Hsp70-mediated folding of proteins (By similarity))	PF08609.10(Fes1:Nucleotide exchange factor Fes1); PF13646.6(HEAT_2:HEAT repeats)	sp|Q4I624|FES1_GIBZE(Hsp70 nucleotide exchange factor FES1 OS=Gibberella zeae (strain PH-1 / ATCC MYA-4620 / FGSC 9075 / NRRL 31084) OX=229533 GN=FES1 PE=3 SV=1)
124452	estExt_fgenesh2_kg.C_190046	subtilisin-like protease	2041	0.124079	-0.0718858	2.33e-14	7.87e-14	1.83727e-13	9.83347e-13	COG1404(S:Function unknown)	COG1404(beige BEACH domain containing protein)	PF00082.22(Peptidase_S8:Subtilase family); PF05922.16(Inhibitor_I9:Peptidase inhibitor I9)	sp|P58371|SPM1_MAGO7(Subtilisin-like proteinase Spm1 OS=Magnaporthe oryzae (strain 70-15 / ATCC MYA-4617 / FGSC 8958) OX=242507 GN=SPM1 PE=3 SV=1)
124460	estExt_fgenesh2_kg.C_190054	Glycoside hydrolase	1319	0.114067	1.02914	0.00176617	0.00305164	0	0	COG5309(S:Function unknown)	COG5309(-)	PF00332.18(Glyco_hydro_17:Glycosyl hydrolases family 17)	sp|B0XXF8|EGLC_ASPFC(Probable glucan endo-1,3-beta-glucosidase eglC OS=Neosartorya fumigata (strain CEA10 / CBS 144.89 / FGSC A1163) OX=451804 GN=eglC PE=3 SV=1)
124777	estExt_fgenesh2_kg.C_230045	expressed protein	1125	-0.743081	-1.92215	0	0	0	0
125216	estExt_fgenesh2_kg.C_310023	Thioredoxin-like protein	720	3.00533	0.163202	0	0	7.64356e-14	4.16815e-13	ENOG410YQ2G(S:Function unknown)	ENOG410YQ2G(-)	PF00085.20(Thioredoxin:Thioredoxin); PF04756.13(OST3_OST6:OST3 / OST6 family, transporter family); PF13098.6(Thioredoxin_2:Thioredoxin-like domain); PF13905.6(Thioredoxin_8:Thioredoxin-like); PF13728.6(TraF:F plasmid transfer operon protein); PF00578.21(AhpC-TSA:AhpC/TSA family)	sp|Q8TFM8|THIO_FUSCU(Thioredoxin-like protein OS=Fusarium culmorum OX=5516 PE=1 SV=1)
125408	estExt_fgenesh2_kg.C_400015	putative prohibitin PHB1	1091	2.22886	0.379057	0	0	1.15861e-23	8.91255e-23	COG0330(O:Posttranslational modification, protein turnover, chaperones)	COG0330(Band 7 protein)	PF01145.25(Band_7:SPFH domain / Band 7 family); PF12127.8(YdfA_immunity:SigmaW regulon antibacterial)	sp|P40961|PHB1_YEAST(Prohibitin-1 OS=Saccharomyces cerevisiae (strain ATCC 204508 / S288c) OX=559292 GN=PHB1 PE=1 SV=2)
125581	estExt_fgenesh2_kg.C_600001	redoxin	608	-0.0317089	-1.56378	0.944038	0.964457	5.97126e-05	0.000171769	COG1225(O:Posttranslational modification, protein turnover, chaperones)	COG1225(alkyl hydroperoxide reductase Thiol specific antioxidant Mal allergen)	PF00578.21(AhpC-TSA:AhpC/TSA family); PF08534.10(Redoxin:Redoxin); PF05988.12(DUF899:Bacterial protein of unknown function (DUF899))	sp|Q75SY5|PRXQ_GENTR(Peroxiredoxin Q, chloroplastic OS=Gentiana triflora OX=55190 GN=AFP1 PE=2 SV=1)
125743	fgenesh1_pm.1_#_157	HCP-like protein	1152	0.509143	0.487201	0.0122656	0.0191954	0.00573158	0.0123954	ENOG410ZNSX(S:Function unknown)	ENOG410ZNSX(Conserved hypothetical, protein)	PF08238.12(Sel1:Sel1 repeat)
125828	fgenesh1_pm.1_#_242	PLC-like phosphodiesterase	1119	1.02065	-0.11095	1.87e-12	5.83e-12	0.14471	0.218636	ENOG410ZQG3(S:Function unknown)	ENOG410ZQG3(PI-PLC X domain-containing protein)		sp|D4AK17|PLCX1_ARTBC(PI-PLC X domain-containing protein 1 OS=Arthroderma benhamiae (strain ATCC MYA-4681 / CBS 112371) OX=663331 GN=ARB_04618 PE=1 SV=1)
125859	fgenesh1_pm.1_#_273	26S proteasome non-ATPase regulatory subunit 11	1272	1.27095	0.00758248	8.82e-69	8.54e-68	0.92741	0.955601	COG5159(O:Posttranslational modification, protein turnover, chaperones)	COG5159(cop9 signalosome complex subunit)	PF18055.1(RPN6_N:26S proteasome regulatory subunit RPN6 N-terminal domain); PF01399.27(PCI:PCI domain); PF18503.1(RPN6_C_helix:26S proteasome subunit RPN6 C-terminal helix domain); PF09756.9(DDRGK:DDRGK domain); PF17874.1(TPR_MalT:MalT-like TPR region)	sp|Q9P7S2|RPN6_SCHPO(Probable 26S proteasome regulatory subunit rpn6 OS=Schizosaccharomyces pombe (strain 972 / ATCC 24843) OX=284812 GN=rpn6 PE=3 SV=1)
126704	fgenesh1_pm.2_#_29	hypothetical protein	1596	2.05196	0.319244	1.15e-30	6.4e-30	0.0124274	0.0251262	COG0476(S:Function unknown)	COG0476(cyclin B1 interacting protein 1, E3 ubiquitin protein ligase)	PF00899.21(ThiF:ThiF family)	sp|Q8VBW6|ULA1_MOUSE(NEDD8-activating enzyme E1 regulatory subunit OS=Mus musculus OX=10090 GN=Nae1 PE=1 SV=1)
126911	fgenesh1_pm.2_#_236	hypothetical protein	1656	-0.0282784	0.426193	0.771494	0.808849	2.9276e-08	1.13736e-07	ENOG410XRFH(S:Function unknown)	ENOG410XRFH(SH3 domain-containing protein)	PF14604.6(SH3_9:Variant SH3 domain); PF00018.28(SH3_1:SH3 domain); PF01102.18(Glycophorin_A:Glycophorin A)
126977	fgenesh1_pm.2_#_302	hypothetical protein	1293	0.761251	0.550389	0.000142821	0.000273119	0.000137127	0.000380047	ENOG410Y4Q2(O:Posttranslational modification, protein turnover, chaperones)	ENOG410Y4Q2(Peroxisome assembly protein)	PF04757.14(Pex2_Pex12:Pex2 / Pex12 amino terminal region)	sp|C8VCP8|PEX12_EMENI(Peroxisome assembly protein 12 OS=Emericella nidulans (strain FGSC A4 / ATCC 38163 / CBS 112.46 / NRRL 194 / M139) OX=227321 GN=PEX12 PE=3 SV=1)
127051	fgenesh1_pm.2_#_376	proteasome maturation factor	456	1.27674	-0.240519	4.77e-27	2.43e-26	0.0389104	0.0700675	ENOG410XUI5(O:Posttranslational modification, protein turnover, chaperones)	ENOG410XUI5(Proteasome maturation protein)	PF05348.11(UMP1:Proteasome maturation factor UMP1)	sp|P38293|UMP1_YEAST(Proteasome maturation factor UMP1 OS=Saccharomyces cerevisiae (strain ATCC 204508 / S288c) OX=559292 GN=UMP1 PE=1 SV=1)
127386	fgenesh1_pm.2_#_711	hypothetical protein	1314	1.95329	0.659911	5.84e-39	3.82e-38	9.31614e-10	4.03423e-09	COG0476(U:Intracellular trafficking, secretion, and vesicular transport)	COG0476(nucleoporin 214kDa)	PF00899.21(ThiF:ThiF family); PF08825.10(E2_bind:E2 binding domain); PF14732.6(UAE_UbL:Ubiquitin/SUMO-activating enzyme ubiquitin-like domain)	sp|Q8TBC4|UBA3_HUMAN(NEDD8-activating enzyme E1 catalytic subunit OS=Homo sapiens OX=9606 GN=UBA3 PE=1 SV=2)
127450	fgenesh1_pm.3_#_39	hypothetical protein	1890	-1.45722	-1.35135	1.96e-91	2.36e-90	6.05054e-42	6.78687e-41	COG0465(I:Lipid transport and metabolism)	COG0465(hydroxymethylglutaryl-CoA synthase activity)	PF08740.11(BCS1_N:BCS1 N terminal); PF00004.29(AAA:ATPase family associated with various cellular activities (AAA))	sp|Q54DY9|BCS1B_DICDI(Probable mitochondrial chaperone BCS1-B OS=Dictyostelium discoideum OX=44689 GN=bcsl1b PE=3 SV=1)
127494	fgenesh1_pm.3_#_83	putative 26S proteasome non-ATPase regulatory subunit 9	744	1.18317	-0.21402	1.46e-06	3.26e-06	0.259924	0.357937	COG0265(S:Function unknown)	COG0265(GTP-binding nuclear protein)	PF18265.1(Nas2_N:Nas2 N_terminal domain); PF17820.1(PDZ_6:PDZ domain); PF04495.14(GRASP55_65:GRASP55/65 PDZ-like domain); PF00595.24(PDZ:PDZ domain); PF13180.6(PDZ_2:PDZ domain)	sp|Q9CR00|PSMD9_MOUSE(26S proteasome non-ATPase regulatory subunit 9 OS=Mus musculus OX=10090 GN=Psmd9 PE=1 SV=1)
127640	fgenesh1_pm.3_#_229	hypothetical protein	588	0.246092	1.51307	0.000400714	0.000738708	3.99822e-202	1.74526e-200	ENOG410Y776(S:Function unknown)	ENOG410Y776(CFEM domain protein)	PF05730.11(CFEM:CFEM domain)	sp|D4AXU8|CFMC_ARTBC(GPI-anchored CFEM domain protein ARB_01017 OS=Arthroderma benhamiae (strain ATCC MYA-4681 / CBS 112371) OX=663331 GN=ARB_01017 PE=3 SV=1)
127836	fgenesh1_pm.3_#_425	ubiquitin-activating enzyme E1 1	4269	1.58741	-0.284215	0	0	2.6749e-19	1.83088e-18	COG0476(S:Function unknown)	COG0476(Conserved hypothetical, protein)	PF00899.21(ThiF:ThiF family); PF10585.9(UBA_e1_thiolCys:Ubiquitin-activating enzyme active site); PF16190.5(E1_FCCH:Ubiquitin-activating enzyme E1 FCCH domain); PF09358.10(E1_UFD:Ubiquitin fold domain); PF16191.5(E1_4HB:Ubiquitin-activating enzyme E1 four-helix bundle); PF13409.6(GST_N_2:Glutathione S-transferase, N-terminal domain); PF13410.6(GST_C_2:Glutathione S-transferase, C-terminal domain)…	sp|P52495|UBA1_CANAW(Ubiquitin-activating enzyme E1 1 OS=Candida albicans (strain WO-1) OX=294748 GN=UBA1 PE=3 SV=2)
127961	fgenesh1_pm.3_#_550	hypothetical protein	1590	1.30227	0.333364	6.32e-98	7.99e-97	3.79848e-14	2.10234e-13	COG0459(S:Function unknown)	COG0459(-)	PF00118.24(Cpn60_TCP1:TCP-1/cpn60 chaperonin family)	sp|Q10147|TCPB_SCHPO(Probable T-complex protein 1 subunit beta OS=Schizosaccharomyces pombe (strain 972 / ATCC 24843) OX=284812 GN=cct2 PE=3 SV=1)
128655	fgenesh1_pm.5_#_193	hypothetical protein	813	0.288327	-1.06736	0.215114	0.272094	5.18284e-05	0.00015021
128741	fgenesh1_pm.5_#_279	Chaperonin Cpn10	336	1.31714	-0.149572	3.18e-32	1.83e-31	0.110663	0.175566	COG0234(O:Posttranslational modification, protein turnover, chaperones)	COG0234(Binds to cpn60 in the presence of Mg-ATP and suppresses the ATPase activity of the latter (By similarity))	PF00166.21(Cpn10:Chaperonin 10 Kd subunit)	sp|O59804|CH10_SCHPO(10 kDa heat shock protein, mitochondrial OS=Schizosaccharomyces pombe (strain 972 / ATCC 24843) OX=284812 GN=hsp10 PE=1 SV=1)
129251	fgenesh1_pm.6_#_385	hypothetical protein	675	-0.0373615	0.053886	0.687778	0.732794	0.559988	0.649552	COG5078(O:Posttranslational modification, protein turnover, chaperones)	COG5078(ubiquitin-conjugating enzyme)	PF00179.26(UQ_con:Ubiquitin-conjugating enzyme)	sp|P14682|UBC3_YEAST(Ubiquitin-conjugating enzyme E2-34 kDa OS=Saccharomyces cerevisiae (strain ATCC 204508 / S288c) OX=559292 GN=CDC34 PE=1 SV=1)
129450	fgenesh1_pm.7_#_123	Redoxin-domain containing protein	573	-0.287535	0.612339	0.258312	0.319812	0.0116823	0.0237915	COG0678(O:Posttranslational modification, protein turnover, chaperones)	COG0678(peroxiredoxin)	PF08534.10(Redoxin:Redoxin)	sp|Q9BGI1|PRDX5_BOVIN(Peroxiredoxin-5, mitochondrial OS=Bos taurus OX=9913 GN=PRDX5 PE=2 SV=2)
129619	fgenesh1_pm.7_#_292	dolichol phosphate mannosyltransferase subunit 3	279	0.43671	0.0552411	0.00055603	0.00100871	0.695968	0.765722	ENOG41124SD(S:Function unknown)	ENOG41124SD(Dolichyl-phosphate mannosyltransferase polypeptide 3)	PF08285.11(DPM3:Dolichol-phosphate mannosyltransferase subunit 3 (DPM3))
129655	fgenesh1_pm.7_#_328	Subtilisin-like protein	2127	-1.1375	-0.273018	0.60506	0.659618	0.796194	0.847186	COG1404(S:Function unknown)	COG1404(-)	PF00082.22(Peptidase_S8:Subtilase family)	sp|P00782|SUBT_BACAM(Subtilisin BPN' OS=Bacillus amyloliquefaciens OX=1390 GN=apr PE=1 SV=1)
129874	fgenesh1_pm.8_#_117	NifU-like domain-containing protein	885	2.33834	0.549808	3.31e-186	6.53e-185	1.0062e-15	5.96119e-15	COG0694(O:Posttranslational modification, protein turnover, chaperones)	COG0694(metallo-sulfur cluster assembly)	PF08712.11(Nfu_N:Scaffold protein Nfu/NifU N terminal); PF01106.17(NifU:NifU-like domain)	sp|Q9UUB8|YH9J_SCHPO(NifU-like protein C1709.19c OS=Schizosaccharomyces pombe (strain 972 / ATCC 24843) OX=284812 GN=SPBC1709.19c PE=3 SV=1)
130129	fgenesh1_pm.9_#_75	hypothetical protein	1350	2.18763	0.107357	0.0088837	0.014121	0.793348	0.845324	ENOG410XSIX(O:Posttranslational modification, protein turnover, chaperones)	ENOG410XSIX(glutathione Stransferase)	PF13417.6(GST_N_3:Glutathione S-transferase, N-terminal domain); PF13409.6(GST_N_2:Glutathione S-transferase, N-terminal domain); PF02798.20(GST_N:Glutathione S-transferase, N-terminal domain); PF13410.6(GST_C_2:Glutathione S-transferase, C-terminal domain)	sp|Q9ZW29|GSTU2_ARATH(Glutathione S-transferase U2 OS=Arabidopsis thaliana OX=3702 GN=GSTU2 PE=2 SV=1)
130512	fgenesh1_pm.10_#_138	Gim complex component GIM3-like protein	414	0.592327	0.0891444	0.00301358	0.00506766	0.597084	0.684941	COG1382(O:Posttranslational modification, protein turnover, chaperones)	COG1382(Molecular chaperone capable of stabilizing a range of proteins. Seems to fulfill an ATP-independent, HSP70-like function in archaeal de novo protein folding (By similarity))	PF01920.20(Prefoldin_2:Prefoldin subunit)	sp|P53900|PFD4_YEAST(Prefoldin subunit 4 OS=Saccharomyces cerevisiae (strain ATCC 204508 / S288c) OX=559292 GN=GIM3 PE=1 SV=1)
130737	fgenesh1_pm.11_#_70	leukotriene A-4 hydrolase	1818	1.36495	0.177362	2.48e-76	2.6e-75	0.021834	0.0419456	COG0308(S:Function unknown)	COG0308(Protein of unknown function (DUF952))	PF01433.20(Peptidase_M1:Peptidase family M1 domain); PF09127.11(Leuk-A4-hydro_C:Leukotriene A4 hydrolase, C-terminal); PF17900.1(Peptidase_M1_N:Peptidase M1 N-terminal domain)	sp|Q7S785|LKHA4_NEUCR(Leucine aminopeptidase 2 OS=Neurospora crassa (strain ATCC 24698 / 74-OR23-1A / CBS 708.71 / DSM 1257 / FGSC 987) OX=367110 GN=ara-1 PE=3 SV=2)
130953	fgenesh1_pm.11_#_286	hypothetical protein	1272	-0.364145	-0.778681	1.78e-07	4.2e-07	5.18044e-48	6.46961e-47	ENOG4111UD7(S:Function unknown); ENOG4110X6Y(S:Function unknown)	ENOG4111UD7(-); ENOG4110X6Y(-)
131271	fgenesh1_pm.13_#_78	P-loop containing nucleoside triphosphate hydrolase protein	2379	-1.40881	-2.7493	1.17e-99	1.5e-98	6.1106e-182	2.41656e-180	ENOG4110SBZ(O:Posttranslational modification, protein turnover, chaperones)	ENOG4110SBZ(ATPase family associated with various cellular activities (AAA))	PF00004.29(AAA:ATPase family associated with various cellular activities (AAA)); PF13191.6(AAA_16:AAA ATPase domain)	sp|Q5T9A4|ATD3B_HUMAN(ATPase family AAA domain-containing protein 3B OS=Homo sapiens OX=9606 GN=ATAD3B PE=1 SV=1)
131475	fgenesh1_pm.14_#_35	Ubiquitin	243	0.745189	-0.232511	6.46e-06	1.38e-05	0.0791356	0.130469	COG5272(S:Function unknown)	COG5272(Methyltransferase domain)	PF00240.23(ubiquitin:Ubiquitin family); PF11976.8(Rad60-SLD:Ubiquitin-2 like Rad60 SUMO-like); PF14560.6(Ubiquitin_2:Ubiquitin-like domain)	sp|Q93725|NEDD8_CAEEL(NEDD8 OS=Caenorhabditis elegans OX=6239 GN=ned-8 PE=1 SV=1)
131776	fgenesh1_pm.15_#_97	putative ubiquitin carboxyl-terminal hydrolase	747	-0.229475	-0.993341	0.0197594	0.0300061	6.64024e-28	5.66348e-27	ENOG4111HNA(O:Posttranslational modification, protein turnover, chaperones)	ENOG4111HNA(ubiquitin carboxyl-terminal)	PF01088.21(Peptidase_C12:Ubiquitin carboxyl-terminal hydrolase, family 1)	sp|Q9JKB1|UCHL3_MOUSE(Ubiquitin carboxyl-terminal hydrolase isozyme L3 OS=Mus musculus OX=10090 GN=Uchl3 PE=1 SV=2)
131986	fgenesh1_pm.16_#_88	Glutathione S-transferase%2C C-terminal-like protein	774	0.973033	-0.853711	0.230402	0.290023	0.176956	0.260467	COG0625(I:Lipid transport and metabolism)	COG0625(Acyltransferase)	PF13409.6(GST_N_2:Glutathione S-transferase, N-terminal domain); PF13417.6(GST_N_3:Glutathione S-transferase, N-terminal domain); PF02798.20(GST_N:Glutathione S-transferase, N-terminal domain); PF14497.6(GST_C_3:Glutathione S-transferase, C-terminal domain); PF00043.25(GST_C:Glutathione S-transferase, C-terminal domain); PF13410.6(GST_C_2:Glutathione S-transferase, C-terminal domain)	sp|P77526|YFCG_ECOLI(Disulfide-bond oxidoreductase YfcG OS=Escherichia coli (strain K12) OX=83333 GN=yfcG PE=1 SV=1)
132048	fgenesh1_pm.16_#_150	Ubiquitin related modifier 1	339	0.838043	-0.511652	0.0552446	0.078176	0.167884	0.248616	COG5131(O:Posttranslational modification, protein turnover, chaperones)	COG5131(tRNA thio-modification)	PF09138.11(Urm1:Urm1 (Ubiquitin related modifier)); PF02597.20(ThiS:ThiS family)	sp|A6S5X1|URM1_BOTFB(Ubiquitin-related modifier 1 OS=Botryotinia fuckeliana (strain B05.10) OX=332648 GN=urm1 PE=3 SV=1)
132254	fgenesh1_pm.17_#_122	WSC-domain containing protein	4548	0.239007	0.491853	0.431256	0.5035	0.01778	0.0348815	ENOG41100QS(S:Function unknown)	ENOG41100QS(WSC domain)	PF01822.19(WSC:WSC domain); PF13570.6(PQQ_3:PQQ-like domain)	sp|D4AUF1|WSCD1_ARTBC(WSC domain-containing protein ARB_07867 OS=Arthroderma benhamiae (strain ATCC MYA-4681 / CBS 112371) OX=663331 GN=ARB_07867 PE=1 SV=1)
132286	fgenesh1_pm.17_#_154	Subtilisin-like protein	2847	1.22239	2.68806	0.24428	0.30351	0.0033846	0.00761329	COG1404(S:Function unknown)	COG1404(GAL4)	PF00082.22(Peptidase_S8:Subtilase family); PF06280.12(fn3_5:Fn3-like domain)	sp|P29141|SUBV_BACSU(Minor extracellular protease vpr OS=Bacillus subtilis (strain 168) OX=224308 GN=vpr PE=1 SV=1)
132597	fgenesh1_pm.19_#_59	proteasome component PRE3 precursor	675	1.67933	0.636189	7.44e-81	8.11e-80	5.70362e-17	3.54237e-16	ENOG410XS23(O:Posttranslational modification, protein turnover, chaperones)	ENOG410XS23(The proteasome is a multicatalytic proteinase complex which is characterized by its ability to cleave peptides with Arg, Phe, Tyr, Leu, and Glu adjacent to the leaving group at neutral or slightly basic pH. The proteasome has an ATP-dependent proteolytic activity (By similarity))	PF00227.26(Proteasome:Proteasome subunit)	sp|P38624|PSB1_YEAST(Proteasome subunit beta type-1 OS=Saccharomyces cerevisiae (strain ATCC 204508 / S288c) OX=559292 GN=PRE3 PE=1 SV=2)
132965	fgenesh1_pm.21_#_41	hypothetical protein	1515	0.997989	-0.0992909	0.000103226	0.000199874	0.632872	0.71361	ENOG41101AD(S:Function unknown)	ENOG41101AD(Conserved hypothetical, protein)	PF09350.10(DUF1992:Domain of unknown function (DUF1992))
133120	fgenesh1_pm.22_#_40	CDK-activating kinase assembly factor MAT1	1149	2.75356	-0.329935	3.23e-37	2.04e-36	0.0071002	0.01507	COG5220(K:Transcription)	COG5220(menage a trois homolog 1, cyclin H assembly factor (Xenopus laevis))	PF06391.13(MAT1:CDK-activating kinase assembly factor MAT1); PF17121.5(zf-C3HC4_5:Zinc finger, C3HC4 type (RING finger)); PF00097.25(zf-C3HC4:Zinc finger, C3HC4 type (RING finger)); PF13920.6(zf-C3HC4_3:Zinc finger, C3HC4 type (RING finger))	sp|Q6FMP4|TFB3_CANGA(RNA polymerase II transcription factor B subunit 3 OS=Candida glabrata (strain ATCC 2001 / CBS 138 / JCM 3761 / NBRC 0622 / NRRL Y-65) OX=284593 GN=TFB3 PE=3 SV=1)
133228	fgenesh1_pm.22_#_148	phosphoethanolamine transferase	762	0.0476491	0.0542282	0.700812	0.744679	0.589522	0.677442	ENOG4111B1J(S:Function unknown)	ENOG4111B1J(phosphatidylinositol glycan anchor biosynthesis, class F)	PF06699.11(PIG-F:GPI biosynthesis protein family Pig-F)	sp|Q4HXT5|GPI11_GIBZE(Glycosylphosphatidylinositol anchor biosynthesis protein 11 OS=Gibberella zeae (strain PH-1 / ATCC MYA-4620 / FGSC 9075 / NRRL 31084) OX=229533 GN=GPI11 PE=3 SV=1)
133433	fgenesh1_pm.24_#_54	hypothetical protein	2361	0.291554	0.320653	5.84e-06	1.25e-05	1.17289e-12	5.99335e-12	ENOG410YQHQ(S:Function unknown)	ENOG410YQHQ(Protein of unknown function (DUF2420))	PF10336.9(DUF2420:Protein of unknown function (DUF2420))
133690	fgenesh1_pm.26_#_36	hypothetical protein	966	1.73436	0.303344	3.66e-49	2.8e-48	0.00137589	0.00330456	ENOG4111HH6(S:Function unknown)	ENOG4111HH6(UBX domain protein)	PF00627.31(UBA:UBA/TS-N domain); PF00789.20(UBX:UBX domain)
133840	fgenesh1_pm.27_#_44	Acid protease	1293	-0.0422282	0.4975	0.94826	0.967903	0.338658	0.446049	ENOG410XNV7(S:Function unknown)	ENOG410XNV7(Hydra magnipapillata)	PF00026.23(Asp:Eukaryotic aspartyl protease); PF14543.6(TAXi_N:Xylanase inhibitor N-terminal)	sp|B6HL60|PEPA_PENRW(Penicillopepsin-1 OS=Penicillium rubens (strain ATCC 28089 / DSM 1075 / NRRL 1951 / Wisconsin 54-1255) OX=500485 GN=pepA PE=3 SV=1)
134881	fgenesh1_pm.41_#_35	Cysteine proteinase	2481	1.39218	-0.246105	2.62e-52	2.1e-51	0.00197894	0.00464093	ENOG410XP0B(O:Posttranslational modification, protein turnover, chaperones)	ENOG410XP0B(Calpain-like cysteine peptidase)	PF00648.21(Peptidase_C2:Calpain family cysteine protease); PF01067.22(Calpain_III:Calpain large subunit, domain III)	sp|Q7RZP7|PALB_NEUCR(Calpain-like protease palB/cpr-8 OS=Neurospora crassa (strain ATCC 24698 / 74-OR23-1A / CBS 708.71 / DSM 1257 / FGSC 987) OX=367110 GN=cpr-8 PE=3 SV=3)
135149	fgenesh1_pm.52_#_15	hypothetical protein	990	13.1596	1.51343	7.27e-23	3.28e-22	2.53192e-11	1.21401e-10	COG0435(O:Posttranslational modification, protein turnover, chaperones)	COG0435(glutathione Stransferase)	PF13409.6(GST_N_2:Glutathione S-transferase, N-terminal domain); PF13410.6(GST_C_2:Glutathione S-transferase, C-terminal domain); PF00043.25(GST_C:Glutathione S-transferase, C-terminal domain); PF14497.6(GST_C_3:Glutathione S-transferase, C-terminal domain); PF13417.6(GST_N_3:Glutathione S-transferase, N-terminal domain)	sp|O94524|GTO2_SCHPO(Glutathione S-transferase omega-like 2 OS=Schizosaccharomyces pombe (strain 972 / ATCC 24843) OX=284812 GN=gto2 PE=3 SV=1)
135283	estExt_fgenesh1_pm.C_1_t10169	calreticulin	1770	0.634446	0.39273	5.79e-150	9.9e-149	2.326e-19	1.59561e-18	ENOG410XP7T(U:Intracellular trafficking, secretion, and vesicular transport)	ENOG410XP7T(Calnexin)	PF00262.18(Calreticulin:Calreticulin family)	sp|Q6Q487|CALX_ASPFU(Calnexin homolog OS=Neosartorya fumigata (strain ATCC MYA-4609 / Af293 / CBS 101355 / FGSC A1100) OX=330879 GN=AFUA_4G12850 PE=2 SV=2)
135284	estExt_fgenesh1_pm.C_1_t10171	hypothetical protein	2133	-0.501319	0.362462	0.0104015	0.0164021	0.0027326	0.00626548	ENOG410YGA9(S:Function unknown)	ENOG410YGA9(F-box domain protein)
135423	estExt_fgenesh1_pm.C_1_t10422	chaperonin GroL	2112	2.67313	-0.625825	0	0	1.45002e-78	2.6208e-77	COG0459(S:Function unknown)	COG0459(actin-depolymerizing factor)	PF00118.24(Cpn60_TCP1:TCP-1/cpn60 chaperonin family)	sp|Q5B041|HSP60_EMENI(Heat shock protein 60 OS=Emericella nidulans (strain FGSC A4 / ATCC 38163 / CBS 112.46 / NRRL 194 / M139) OX=227321 GN=hsp60 PE=1 SV=1)
135480	estExt_fgenesh1_pm.C_1_t20054	Glutathione S-transferase%2C C-terminal-like protein	870	1.68725	1.05049	1.38e-09	3.74e-09	9.9118e-10	4.28216e-09	ENOG410XSIX(S:Function unknown)	ENOG410XSIX(Family with sequence similarity 50, member)	PF13409.6(GST_N_2:Glutathione S-transferase, N-terminal domain); PF13417.6(GST_N_3:Glutathione S-transferase, N-terminal domain); PF02798.20(GST_N:Glutathione S-transferase, N-terminal domain); PF13410.6(GST_C_2:Glutathione S-transferase, C-terminal domain); PF00043.25(GST_C:Glutathione S-transferase, C-terminal domain)	sp|Q9N1F5|GSTO1_PIG(Glutathione S-transferase omega-1 OS=Sus scrofa OX=9823 GN=GSTO1 PE=1 SV=2)
135507	estExt_fgenesh1_pm.C_1_t20136	aspartic protease pro-precursor	1247	2.61546	1.61781	8e-05	0.000156705	1.31274e-08	5.24304e-08	ENOG410XNV7(S:Function unknown)	ENOG410XNV7(Cupin 2 Conserved Barrel Domain Protein)	PF00026.23(Asp:Eukaryotic aspartyl protease); PF14543.6(TAXi_N:Xylanase inhibitor N-terminal)	sp|P11838|CARP_CRYPA(Endothiapepsin OS=Cryphonectria parasitica OX=5116 GN=EAPA PE=1 SV=2)
135591	estExt_fgenesh1_pm.C_1_t20297	PMSR-domain containing protein	925	1.33183	0.366861	5.26e-66	4.94e-65	0.000395648	0.00103165	COG0225(O:Posttranslational modification, protein turnover, chaperones)	COG0225(Has an important function as a repair enzyme for proteins that have been inactivated by oxidation. Catalyzes the reversible oxidation-reduction of methionine sulfoxide in proteins to methionine (By similarity))	PF01625.21(PMSR:Peptide methionine sulfoxide reductase)	sp|Q09859|MSRA_SCHPO(Probable peptide methionine sulfoxide reductase OS=Schizosaccharomyces pombe (strain 972 / ATCC 24843) OX=284812 GN=mxr1 PE=3 SV=2)
135660	estExt_fgenesh1_pm.C_1_t20449	hypothetical protein	3423	0.937467	-0.62531	7.67e-303	2.13e-301	1.26544e-84	2.39966e-83	ENOG410Y5WM(S:Function unknown)	ENOG410Y5WM(oxidoreductase)	PF00578.21(AhpC-TSA:AhpC/TSA family); PF13418.6(Kelch_4:Galactose oxidase, central domain); PF13854.6(Kelch_5:Kelch motif); PF08534.10(Redoxin:Redoxin); PF13964.6(Kelch_6:Kelch motif); PF13415.6(Kelch_3:Galactose oxidase, central domain); PF01344.25(Kelch_1:Kelch motif); PF10417.9(1-cysPrx_C:C-terminal domain of 1-Cys peroxiredoxin); PF07646.15(Kelch_2:Kelch motif)	sp|P34227|PRX1_YEAST(Peroxiredoxin PRX1, mitochondrial OS=Saccharomyces cerevisiae (strain ATCC 204508 / S288c) OX=559292 GN=PRX1 PE=1 SV=1)
135691	estExt_fgenesh1_pm.C_1_t30012	hypothetical protein	2910	-1.90316	-1.71229	0	0	0	0	ENOG410YFWQ(S:Function unknown)	ENOG410YFWQ(F-box domain protein)	PF00004.29(AAA:ATPase family associated with various cellular activities (AAA)); PF13191.6(AAA_16:AAA ATPase domain)	sp|P46468|CDAT_PLAF7(Putative cell division cycle ATPase OS=Plasmodium falciparum (isolate 3D7) OX=36329 GN=PF07_0047 PE=3 SV=2)
135863	estExt_fgenesh1_pm.C_2_t10296	chaperone DnaJ	1777	2.57251	-0.772428	4.18e-166	7.67e-165	1.73737e-30	1.57934e-29	COG0484(O:Posttranslational modification, protein turnover, chaperones)	COG0484(DnaJ (Hsp40) homolog, subfamily C, member 8)	PF01556.18(DnaJ_C:DnaJ C terminal domain); PF00226.31(DnaJ:DnaJ domain); PF00684.19(DnaJ_CXXCXGXG:DnaJ central domain)	sp|C8V213|MDJ1_EMENI(DnaJ homolog 1, mitochondrial OS=Emericella nidulans (strain FGSC A4 / ATCC 38163 / CBS 112.46 / NRRL 194 / M139) OX=227321 GN=AN10778 PE=3 SV=1)
135899	estExt_fgenesh1_pm.C_2_t10367	ATP-dependent protease La	2814	2.54882	-0.439562	3.08e-184	6.03e-183	1.10446e-14	6.23214e-14	COG0466(L:Replication, recombination and repair)	COG0466(Replication Protein)	PF05362.13(Lon_C:Lon protease (S16) C-terminal proteolytic domain); PF02190.16(LON_substr_bdg:ATP-dependent protease La (LON) substrate-binding domain); PF00004.29(AAA:ATPase family associated with various cellular activities (AAA)); PF07728.14(AAA_5:AAA domain (dynein-related subfamily)); PF13541.6(ChlI:Subunit ChlI of Mg-chelatase); PF13191.6(AAA_16:AAA ATPase domain); PF13401.6(AAA_22:AAA doma…	sp|Q7SA85|LONP2_NEUCR(Lon protease homolog 2, peroxisomal OS=Neurospora crassa (strain ATCC 24698 / 74-OR23-1A / CBS 708.71 / DSM 1257 / FGSC 987) OX=367110 GN=NCU08303 PE=3 SV=1)
135918	estExt_fgenesh1_pm.C_2_t10399	ubiquitin-conjugating enzyme E2	937	0.681271	-0.301167	4.27e-17	1.6e-16	2.87672e-07	1.03223e-06	COG5078(S:Function unknown)	COG5078(SUN domain protein (Adg3))	PF00179.26(UQ_con:Ubiquitin-conjugating enzyme); PF14461.6(Prok-E2_B:Prokaryotic E2 family B)	sp|P78717|UBC2_NECHA(Ubiquitin-conjugating enzyme E2 2 OS=Nectria haematococca OX=140110 GN=UBC2 PE=3 SV=1)
135994	estExt_fgenesh1_pm.C_2_t20037	HECT-domain containing protein	2896	-0.35451	-0.207515	5.13e-13	1.63e-12	4.3222e-06	1.40195e-05	COG5021(C:Energy production and conversion)	COG5021(NDH-1 shuttles electrons from NADH, via FMN and iron- sulfur (Fe-S) centers, to quinones in the respiratory chain. The immediate electron acceptor for the enzyme in this species is believed to be ubiquinone. Couples the redox reaction to proton translocation (for every two electrons transferred, four hydrogen ions are translocated across the cytoplasmic membrane), and thus conserves the r…	PF00632.25(HECT:HECT-domain (ubiquitin-transferase)); PF00397.26(WW:WW domain); PF00168.30(C2:C2 domain)	sp|G0S9J5|RSP5_CHATD(E3 ubiquitin-protein ligase RSP5 OS=Chaetomium thermophilum (strain DSM 1495 / CBS 144.50 / IMI 039719) OX=759272 GN=RSP5 PE=3 SV=2)
136284	estExt_fgenesh1_pm.C_3_t10421	P-loop containing nucleoside triphosphate hydrolase protein	1686	0.129283	-10.9069	0.871258	0.899783	2.35184e-08	9.19085e-08	COG0464(S:Function unknown)	COG0464(-)	PF00004.29(AAA:ATPase family associated with various cellular activities (AAA))	sp|F4JEX5|FIGL1_ARATH(ATPase family AAA domain-containing protein FIGL1 OS=Arabidopsis thaliana OX=3702 GN=FIGL1 PE=2 SV=2)
136523	estExt_fgenesh1_pm.C_40424	Peptidase C15%2C pyroglutamyl peptidase I-like protein	1214	0.364764	0.877069	0.0418676	0.0603709	8.8217e-13	4.5505e-12	ENOG4111XZZ(S:Function unknown)	ENOG4111XZZ(Pyroglutamyl peptidase type I)	PF01470.17(Peptidase_C15:Pyroglutamyl peptidase)	sp|Q9NXJ5|PGPI_HUMAN(Pyroglutamyl-peptidase 1 OS=Homo sapiens OX=9606 GN=PGPEP1 PE=1 SV=1)
136825	estExt_fgenesh1_pm.C_60325	glucosidase II alpha subunit	3093	1.77605	0.697271	1.05e-104	1.4e-103	6.1607e-11	2.87935e-10	COG1501(F:Nucleotide transport and metabolism)	COG1501(Major role in the synthesis of nucleoside triphosphates other than ATP. The ATP gamma phosphate is transferred to the NDP beta phosphate via a ping-pong mechanism, using a phosphorylated active-site intermediate (By similarity))	PF01055.26(Glyco_hydro_31:Glycosyl hydrolases family 31); PF13802.6(Gal_mutarotas_2:Galactose mutarotase-like); PF17137.4(DUF5110:Domain of unknown function (DUF5110))	sp|Q9US55|GLU2A_SCHPO(Glucosidase 2 subunit alpha OS=Schizosaccharomyces pombe (strain 972 / ATCC 24843) OX=284812 GN=gls2 PE=1 SV=1)
136831	estExt_fgenesh1_pm.C_60345	N-terminal nucleophile aminohydrolases (Ntn hydrolases)	903	1.22595	0.00516249	1.53e-94	1.88e-93	0.945994	0.969783	COG0638(O:Posttranslational modification, protein turnover, chaperones)	COG0638(The proteasome is a multicatalytic proteinase complex which is characterized by its ability to cleave peptides with Arg, Phe, Tyr, Leu, and Glu adjacent to the leaving group at neutral or slightly basic pH. The proteasome has an ATP-dependent proteolytic activity (By similarity))	PF00227.26(Proteasome:Proteasome subunit); PF10584.9(Proteasome_A_N:Proteasome subunit A N-terminal signature)	sp|O14250|PSA6_SCHPO(Probable proteasome subunit alpha type-6 OS=Schizosaccharomyces pombe (strain 972 / ATCC 24843) OX=284812 GN=SPAC6G10.04c PE=3 SV=1)
136900	estExt_fgenesh1_pm.C_70039	UBC-like protein	1003	-0.14929	0.0079896	0.00413092	0.00684681	0.856146	0.898478	ENOG410Z0AN(O:Posttranslational modification, protein turnover, chaperones)	ENOG410Z0AN(Ubiquitin-conjugating enzyme E2)	PF00179.26(UQ_con:Ubiquitin-conjugating enzyme)	sp|O42646|UBC6_SCHPO(Ubiquitin-conjugating enzyme E2 6 OS=Schizosaccharomyces pombe (strain 972 / ATCC 24843) OX=284812 GN=ubc6 PE=2 SV=1)
137084	estExt_fgenesh1_pm.C_70426	Glycosylphosphatidylinositol:protein transamidase%2C GAA1 component	1931	1.08556	0.0770538	3.2e-36	1.99e-35	0.34408	0.452032	ENOG410XT16(S:Function unknown)	ENOG410XT16(glycosylphosphatidylinositol anchor attachment protein 1 homolog (yeast))	PF04114.14(Gaa1:Gaa1-like, GPI transamidase component)	sp|Q9US48|GAA1_SCHPO(GPI transamidase component gaa1 OS=Schizosaccharomyces pombe (strain 972 / ATCC 24843) OX=284812 GN=gaa1 PE=3 SV=1)
137317	estExt_fgenesh1_pm.C_90129	N-terminal nucleophile aminohydrolases (Ntn hydrolases)	746	1.17105	-0.0616267	1.78e-54	1.47e-53	0.329116	0.435527	ENOG410XSC8(O:Posttranslational modification, protein turnover, chaperones)	ENOG410XSC8(The proteasome is a multicatalytic proteinase complex which is characterized by its ability to cleave peptides with Arg, Phe, Tyr, Leu, and Glu adjacent to the leaving group at neutral or slightly basic pH. The proteasome has an ATP-dependent proteolytic activity (By similarity))	PF00227.26(Proteasome:Proteasome subunit)	sp|P25451|PSB3_YEAST(Proteasome subunit beta type-3 OS=Saccharomyces cerevisiae (strain ATCC 204508 / S288c) OX=559292 GN=PUP3 PE=1 SV=1)
137683	estExt_fgenesh1_pm.C_110262	hypothetical protein	1221	1.05969	-0.143795	2.26e-39	1.49e-38	0.470444	0.579769	ENOG411224M(U:Intracellular trafficking, secretion, and vesicular transport)	ENOG411224M(Required for protein translocation and folding in the endoplasmic reticulum (ER))	PF16782.5(SIL1:Nucleotide exchange factor SIL1)	sp|Q5A360|SIL1_CANAL(Nucleotide exchange factor SIL1 OS=Candida albicans (strain SC5314 / ATCC MYA-2876) OX=237561 GN=SIL1 PE=3 SV=1)
137739	estExt_fgenesh1_pm.C_120092	heat shock protein 70	2182	-0.477844	-1.0086	6.82e-48	5.1e-47	2.54888e-188	1.03453e-186	COG0443(S:Function unknown)	COG0443(-)	PF00012.20(HSP70:Hsp70 protein); PF06723.13(MreB_Mbl:MreB/Mbl protein)	sp|G0SCU5|SSB1_CHATD(Ribosome-associated molecular chaperone SSB1 OS=Chaetomium thermophilum (strain DSM 1495 / CBS 144.50 / IMI 039719) OX=759272 GN=SSB1 PE=1 SV=2)
138080	estExt_fgenesh1_pm.C_150043	expressed protein	1620	-0.563222	0.200535	2.03e-87	2.34e-86	9.46148e-16	5.6126e-15	ENOG410Z05N(S:Function unknown)	ENOG410Z05N(-)	PF04478.12(Mid2:Mid2 like cell wall stress sensor)
138652	estExt_fgenesh1_pm.C_210085	hypothetical protein	916	1.27406	0.383253	9.25e-101	1.19e-99	1.10185e-09	4.75142e-09	COG3175(O:Posttranslational modification, protein turnover, chaperones)	COG3175(Cytochrome C oxidase assembly protein)	PF04442.14(CtaG_Cox11:Cytochrome c oxidase assembly protein CtaG/Cox11)	sp|P19516|COX11_YEAST(Cytochrome c oxidase assembly protein COX11, mitochondrial OS=Saccharomyces cerevisiae (strain ATCC 204508 / S288c) OX=559292 GN=COX11 PE=1 SV=2)
138710	estExt_fgenesh1_pm.C_220053	golgi GDP-mannose transporter	1713	-0.247875	0.51132	3.69e-05	7.44e-05	5.11246e-22	3.76678e-21	COG5070(U:Intracellular trafficking, secretion, and vesicular transport)	COG5070(Solute carrier family 35)	PF08449.11(UAA:UAA transporter family)	sp|A4RM13|GMT_MAGO7(GDP-mannose transporter OS=Magnaporthe oryzae (strain 70-15 / ATCC MYA-4617 / FGSC 8958) OX=242507 GN=VRG4 PE=3 SV=1)
138712	estExt_fgenesh1_pm.C_220058	OTU-domain containing protein	1055	0.819826	-0.174574	0.0105932	0.0166726	0.434314	0.542541	COG5539(O:Posttranslational modification, protein turnover, chaperones)	COG5539(otu domain-containing protein)	PF02338.19(OTU:OTU-like cysteine protease)	sp|P38747|OTU2_YEAST(OTU domain-containing protein 2 OS=Saccharomyces cerevisiae (strain ATCC 204508 / S288c) OX=559292 GN=OTU2 PE=1 SV=1)
138912	estExt_fgenesh1_pm.C_250082	hypothetical protein	3018	2.08582	-0.0774868	3.54e-39	2.33e-38	0.51083	0.609178	ENOG4111H0C(S:Function unknown)	ENOG4111H0C(Spinocerebellar ataxia type 10 protein domain)	PF09759.9(Atx10homo_assoc:Spinocerebellar ataxia type 10 protein domain)
139060	estExt_fgenesh1_pm.C_280023	UBC-like protein	1109	1.88028	0.333189	5.48e-49	4.17e-48	0.000951684	0.00233728	COG5078(K:Transcription)	COG5078(transcription initiation factor complex)	PF00179.26(UQ_con:Ubiquitin-conjugating enzyme)	sp|Q9Y385|UB2J1_HUMAN(Ubiquitin-conjugating enzyme E2 J1 OS=Homo sapiens OX=9606 GN=UBE2J1 PE=1 SV=2)
139359	estExt_fgenesh1_pm.C_360039	putative COP9 signalosome subunit 1	1862	1.33967	-0.163772	2.48e-32	1.43e-31	0.0563862	0.0975506	ENOG410XRXI(O:Posttranslational modification, protein turnover, chaperones)	ENOG410XRXI(cop9 signalosome complex subunit)	PF10602.9(RPN7:26S proteasome subunit RPN7); PF01399.27(PCI:PCI domain)	sp|Q7RXQ1|CSN1_NEUCR(COP9 signalosome complex subunit 1 OS=Neurospora crassa (strain ATCC 24698 / 74-OR23-1A / CBS 708.71 / DSM 1257 / FGSC 987) OX=367110 GN=csn-1 PE=1 SV=1)
139491	estExt_fgenesh1_pm.C_420028	hypothetical protein	1179	0.907732	0.47979	2.34e-05	4.79e-05	0.028989	0.0539876	ENOG410YPVA(O:Posttranslational modification, protein turnover, chaperones)	ENOG410YPVA(RCE1 homolog, prenyl protein protease (S. cerevisiae))	PF02517.16(CPBP:CPBP intramembrane metalloprotease)	sp|O94448|RCE1_SCHPO(Probable CAAX prenyl protease 2 OS=Schizosaccharomyces pombe (strain 972 / ATCC 24843) OX=284812 GN=SPAC1687.02 PE=3 SV=1)
139633	estExt_fgenesh1_pg.C_1_t10124	Endoglucanase-4	1297	1.79583	-0.542384	0	0	2.02096e-74	3.46975e-73	ENOG410YCFF(G:Carbohydrate transport and metabolism); ENOG410YBW9(G:Carbohydrate transport and metabolism)	ENOG410YCFF(Glycoside hydrolase family 61); ENOG410YBW9(endo-glucanase)	PF03443.14(Glyco_hydro_61:Glycosyl hydrolase family 61); PF00734.18(CBM_1:Fungal cellulose binding domain)	sp|O14405|GUN4_HYPJE(Endoglucanase-4 OS=Hypocrea jecorina OX=51453 GN=cel61a PE=1 SV=1)
139701	estExt_fgenesh1_pg.C_1_t10259	a-pheromone processing metallopeptidase Ste23	3374	0.97584	0.0753993	1.42e-46	1.04e-45	0.114441	0.180139	COG1025(O:Posttranslational modification, protein turnover, chaperones)	COG1025(metalloendopeptidase activity)	PF16187.5(Peptidase_M16_M:Middle or third domain of peptidase_M16); PF00675.20(Peptidase_M16:Insulinase (Peptidase family M16)); PF05193.21(Peptidase_M16_C:Peptidase M16 inactive domain)	sp|O14077|MU138_SCHPO(Putative zinc protease mug138 OS=Schizosaccharomyces pombe (strain 972 / ATCC 24843) OX=284812 GN=mug138 PE=1 SV=1)
139829	estExt_fgenesh1_pg.C_1_t20036	Thioredoxin-domain containing protein	1462	1.15766	-0.103427	2.79e-79	3.01e-78	0.273924	0.372888	COG0526(U:Intracellular trafficking, secretion, and vesicular transport)	COG0526(Vps20-associated 1 homolog (S. cerevisiae))	PF00085.20(Thioredoxin:Thioredoxin); PF13848.6(Thioredoxin_6:Thioredoxin-like domain); PF13098.6(Thioredoxin_2:Thioredoxin-like domain); PF04756.13(OST3_OST6:OST3 / OST6 family, transporter family)	sp|Q869Z0|Y5025_DICDI(Putative protein disulfide-isomerase DDB_G0275025 OS=Dictyostelium discoideum OX=44689 GN=DDB_G0275025 PE=1 SV=1)
139959	estExt_fgenesh1_pg.C_1_t20295	Acid protease	1720	0.233083	-0.131752	2.53e-05	5.17e-05	0.0110805	0.0226905	ENOG410XNV7(J:Translation, ribosomal structure and biogenesis)	ENOG410XNV7(Catalyzes the GTP-dependent ribosomal translocation step during translation elongation. During this step, the ribosome changes from the pre-translocational (PRE) to the post- translocational (POST) state as the newly formed A-site-bound peptidyl-tRNA and P-site-bound deacylated tRNA move to the P and E sites, respectively. Catalyzes the coordinated movement of the two tRNA molecules, …	PF00026.23(Asp:Eukaryotic aspartyl protease); PF14543.6(TAXi_N:Xylanase inhibitor N-terminal)	sp|Q8NKB6|OPSB_ASPOR(Probable aspartic-type endopeptidase opsB OS=Aspergillus oryzae (strain ATCC 42149 / RIB 40) OX=510516 GN=opsB PE=2 SV=1)
140102	estExt_fgenesh1_pg.C_2_t10150	GPI-anchor transamidase precursor	1664	1.65727	-0.109654	5.26e-90	6.24e-89	0.0908014	0.14765	COG5206(O:Posttranslational modification, protein turnover, chaperones)	COG5206(phosphatidylinositol glycan anchor biosynthesis, class K)	PF01650.18(Peptidase_C13:Peptidase C13 family)	sp|P49018|GPI8_YEAST(GPI-anchor transamidase OS=Saccharomyces cerevisiae (strain ATCC 204508 / S288c) OX=559292 GN=GPI8 PE=1 SV=1)
140396	estExt_fgenesh1_pg.C_3_t10084	expressed protein	1950	-0.675608	-0.258415	7.46e-28	3.89e-27	7.63692e-05	0.000216985	COG0545(O:Posttranslational modification, protein turnover, chaperones)	COG0545(Peptidyl-prolyl cis-trans isomerase)	PF17800.1(NPL:Nucleoplasmin-like domain); PF00254.28(FKBP_C:FKBP-type peptidyl-prolyl cis-trans isomerase)	sp|Q4INZ9|FKBP4_GIBZE(FK506-binding protein 4 OS=Gibberella zeae (strain PH-1 / ATCC MYA-4620 / FGSC 9075 / NRRL 31084) OX=229533 GN=FPR4 PE=3 SV=1)
140837	estExt_fgenesh1_pg.C_50270	ubiquitin carboxyl-terminal hydrolase 14	1925	0.995086	-0.347812	1.77e-50	1.38e-49	1.19921e-07	4.46218e-07	ENOG410XP96(O:Posttranslational modification, protein turnover, chaperones)	ENOG410XP96(ubiquitin thiolesterase activity)	PF00443.29(UCH:Ubiquitin carboxyl-terminal hydrolase); PF13423.6(UCH_1:Ubiquitin carboxyl-terminal hydrolase); PF00240.23(ubiquitin:Ubiquitin family)	sp|Q92353|UBP6_SCHPO(Ubiquitin carboxyl-terminal hydrolase 6 OS=Schizosaccharomyces pombe (strain 972 / ATCC 24843) OX=284812 GN=ubp6 PE=1 SV=2)
140846	estExt_fgenesh1_pg.C_50293	secreted aspartic proteinase	1907	0.795343	0.14493	8.47e-25	4.02e-24	0.0985112	0.158571	ENOG410XNV7(O:Posttranslational modification, protein turnover, chaperones)	ENOG410XNV7(aspartic)	PF00026.23(Asp:Eukaryotic aspartyl protease); PF14543.6(TAXi_N:Xylanase inhibitor N-terminal)	sp|C4YMJ3|CARP2_CANAW(Candidapepsin-2 OS=Candida albicans (strain WO-1) OX=294748 GN=SAP2 PE=1 SV=1)
140944	estExt_fgenesh1_pg.C_60200	expressed protein	1195	-0.320071	-0.425619	7.04e-12	2.13e-11	2.0529e-15	1.19632e-14	ENOG41126EU(S:Function unknown)	ENOG41126EU(Conserved hypothetical, protein)	PF04979.14(IPP-2:Protein phosphatase inhibitor 2 (IPP-2))
140956	estExt_fgenesh1_pg.C_60225	protein transport protein SEC61 alpha subunit	1737	0.283003	0.867843	9.2e-31	5.13e-30	3.91126e-86	7.50929e-85	COG0201(U:Intracellular trafficking, secretion, and vesicular transport)	COG0201(The central subunit of the protein translocation channel SecYEG. Consists of two halves formed by TMs 1-5 and 6-10. These two domains form a lateral gate at the front which open onto the bilayer between TMs 2 and 7, and are clamped together by SecE at the back. The channel is closed by both a pore ring composed of hydrophobic SecY resides and a short helix (helix 2A) on the extracellular …	PF00344.20(SecY:SecY translocase); PF10559.9(Plug_translocon:Plug domain of Sec61p)	sp|Q870W0|SC61A_NEUCR(Protein transport protein SEC61 subunit alpha OS=Neurospora crassa (strain ATCC 24698 / 74-OR23-1A / CBS 708.71 / DSM 1257 / FGSC 987) OX=367110 GN=sec-61 PE=3 SV=1)
140963	estExt_fgenesh1_pg.C_60242	Mitochondrial presequence protease	3190	1.27879	-0.110362	7.96e-121	1.16e-119	0.0566714	0.097989	COG1026(O:Posttranslational modification, protein turnover, chaperones)	COG1026(Protease HtpX homolog)	PF08367.11(M16C_assoc:Peptidase M16C associated); PF05193.21(Peptidase_M16_C:Peptidase M16 inactive domain); PF00675.20(Peptidase_M16:Insulinase (Peptidase family M16))	sp|Q4IA56|CYM1_GIBZE(Mitochondrial presequence protease OS=Gibberella zeae (strain PH-1 / ATCC MYA-4620 / FGSC 9075 / NRRL 31084) OX=229533 GN=CYM1 PE=3 SV=1)
140969	estExt_fgenesh1_pg.C_60251	putative geranylgeranyltransferase type I alpha subunit	1636	0.400011	-0.254549	4.1e-05	8.24e-05	0.00535996	0.0116763	COG5536(O:Posttranslational modification, protein turnover, chaperones)	COG5536((alpha) subunit)	PF01239.22(PPTA:Protein prenyltransferase alpha subunit repeat)	sp|Q9Y765|FNTA_CANAX(Protein farnesyltransferase/geranylgeranyltransferase type-1 subunit alpha OS=Candida albicans OX=5476 GN=RAM2 PE=1 SV=1)
141021	estExt_fgenesh1_pg.C_60362	glutathione peroxidase-like protein	629	1.07577	1.21624	1.2e-79	1.3e-78	4.7208e-170	1.74049e-168	COG0386(O:Posttranslational modification, protein turnover, chaperones)	COG0386(glutathione peroxidase)	PF00255.19(GSHPx:Glutathione peroxidase); PF00578.21(AhpC-TSA:AhpC/TSA family)	sp|O59858|GPX1_SCHPO(Glutathione peroxidase-like peroxiredoxin gpx1 OS=Schizosaccharomyces pombe (strain 972 / ATCC 24843) OX=284812 GN=gpx1 PE=1 SV=1)
141494	estExt_fgenesh1_pg.C_90257	serin endopeptidase	2774	-3.1343	1.87704	0	0	5.22124e-235	2.64029e-233	COG1404(S:Function unknown)	COG1404(HET-s LopB domain protein)	PF00082.22(Peptidase_S8:Subtilase family); PF06280.12(fn3_5:Fn3-like domain); PF02225.22(PA:PA domain)	sp|P29141|SUBV_BACSU(Minor extracellular protease vpr OS=Bacillus subtilis (strain 168) OX=224308 GN=vpr PE=1 SV=1)
141730	estExt_fgenesh1_pg.C_110203	20S proteasome subunit	973	0.70736	-0.0518761	1.77e-33	1.05e-32	0.325092	0.430941	ENOG410YAMA(O:Posttranslational modification, protein turnover, chaperones)	ENOG410YAMA(The proteasome is a multicatalytic proteinase complex which is characterized by its ability to cleave peptides with Arg, Phe, Tyr, Leu, and Glu adjacent to the leaving group at neutral or slightly basic pH. The proteasome has an ATP-dependent proteolytic activity (By similarity))	PF00227.26(Proteasome:Proteasome subunit)	sp|P30657|PSB7_YEAST(Proteasome subunit beta type-7 OS=Saccharomyces cerevisiae (strain ATCC 204508 / S288c) OX=559292 GN=PRE4 PE=1 SV=1)
141746	estExt_fgenesh1_pg.C_110231	glutaredoxin domain protein	1396	0.394059	0.416714	0.00259162	0.0043856	0.000236448	0.000637184	COG0695(S:Function unknown)	COG0695(-)	PF00462.24(Glutaredoxin:Glutaredoxin)	sp|Q12438|GLRX6_YEAST(Monothiol glutaredoxin-6 OS=Saccharomyces cerevisiae (strain ATCC 204508 / S288c) OX=559292 GN=GRX6 PE=1 SV=1)
141804	estExt_fgenesh1_pg.C_120097	putative ubiquitin-protein ligase Sel1/Ubx2	2475	1.07438	0.275878	2.49e-112	3.47e-111	1.06907e-05	3.34341e-05	COG0790(L:Replication, recombination and repair)	COG0790(Excises uracil residues from the DNA which can arise as a result of misincorporation of dUMP residues by DNA polymerase or due to deamination of cytosine (By similarity))	PF08238.12(Sel1:Sel1 repeat)	sp|O13875|YE1A_SCHPO(Uncharacterized Sel1-like repeat-containing protein C1B3.10c OS=Schizosaccharomyces pombe (strain 972 / ATCC 24843) OX=284812 GN=SPAC1B3.10c PE=3 SV=4)
141920	estExt_fgenesh1_pg.C_130115	thioredoxin reductase	994	1.59775	1.05946	9.75e-111	1.35e-109	2.90534e-102	6.28178e-101	COG0492(U:Intracellular trafficking, secretion, and vesicular transport)	COG0492(Vacuolar Protein)	PF07992.14(Pyr_redox_2:Pyridine nucleotide-disulphide oxidoreductase); PF13738.6(Pyr_redox_3:Pyridine nucleotide-disulphide oxidoreductase); PF00070.27(Pyr_redox:Pyridine nucleotide-disulphide oxidoreductase); PF13241.6(NAD_binding_7:Putative NAD(P)-binding); PF12831.7(FAD_oxidored:FAD dependent oxidoreductase); PF01946.17(Thi4:Thi4 family)	sp|P51978|TRXB_NEUCR(Thioredoxin reductase OS=Neurospora crassa (strain ATCC 24698 / 74-OR23-1A / CBS 708.71 / DSM 1257 / FGSC 987) OX=367110 GN=cys-9 PE=3 SV=1)
142031	estExt_fgenesh1_pg.C_140116	T-complex protein 1	1815	0.769765	0.15996	6.48e-62	5.83e-61	3.02208e-05	8.98372e-05	COG0459(S:Function unknown)	COG0459(Conserved hypothetical, protein)	PF00118.24(Cpn60_TCP1:TCP-1/cpn60 chaperonin family)	sp|Q9UTM4|TCPE_SCHPO(T-complex protein 1 subunit epsilon OS=Schizosaccharomyces pombe (strain 972 / ATCC 24843) OX=284812 GN=cct5 PE=3 SV=1)
142047	estExt_fgenesh1_pg.C_140149	hypothetical protein	1255	-0.130438	0.385007	0.136872	0.179117	0.00297142	0.00676113			PF05730.11(CFEM:CFEM domain)
142211	estExt_fgenesh1_pg.C_160108	ATP-dependent metallopeptidase Hfl	2703	1.83539	0.239131	2.41e-263	5.95e-262	1.04131e-06	3.56373e-06	COG0465(U:Intracellular trafficking, secretion, and vesicular transport)	COG0465(solute carrier family 4)	PF01434.18(Peptidase_M41:Peptidase family M41); PF00004.29(AAA:ATPase family associated with various cellular activities (AAA)); PF17862.1(AAA_lid_3:AAA+ lid domain); PF06480.15(FtsH_ext:FtsH Extracellular)	sp|P40341|YTA12_YEAST(Mitochondrial respiratory chain complexes assembly protein YTA12 OS=Saccharomyces cerevisiae (strain ATCC 204508 / S288c) OX=559292 GN=YTA12 PE=1 SV=2)
142272	estExt_fgenesh1_pg.C_170007	Actin-like ATPase domain-containing protein	2019	1.46894	0.594971	5.7e-25	2.72e-24	1.83268e-07	6.71135e-07	COG0443(S:Function unknown)	COG0443(-)	PF00012.20(HSP70:Hsp70 protein); PF14450.6(FtsA:Cell division protein FtsA)	sp|Q8K0U4|HS12A_MOUSE(Heat shock 70 kDa protein 12A OS=Mus musculus OX=10090 GN=Hspa12a PE=1 SV=1)
142364	estExt_fgenesh1_pg.C_180056	ubiquitin carboxyl-terminal hydrolase 2	972	1.16584	-0.554937	8.17e-18	3.12e-17	4.1334e-06	1.34306e-05	ENOG410XP0P(S:Function unknown)	ENOG410XP0P(Conserved fungal protein)	PF01088.21(Peptidase_C12:Ubiquitin carboxyl-terminal hydrolase, family 1); PF18031.1(UCH_C:Ubiquitin carboxyl-terminal hydrolases)	sp|Q9UUB6|UBLH2_SCHPO(Ubiquitin carboxyl-terminal hydrolase 2 OS=Schizosaccharomyces pombe (strain 972 / ATCC 24843) OX=284812 GN=uch2 PE=1 SV=1)
142450	estExt_fgenesh1_pg.C_190092	Dolichyl-diphosphooligosaccharide-protein glycosyltransferase 48kDa subunit	1436	0.971747	0.68408	1.02e-89	1.2e-88	2.2293e-19	1.53041e-18	ENOG410XSF3(S:Function unknown)	ENOG410XSF3(Dolichyl-diphosphooligosaccharide--protein glycosyltransferase)	PF03345.14(DDOST_48kD:Oligosaccharyltransferase 48 kDa subunit beta)	sp|O59866|OSTB_SCHPO(Dolichyl-diphosphooligosaccharide--protein glycosyltransferase subunit wbp1 OS=Schizosaccharomyces pombe (strain 972 / ATCC 24843) OX=284812 GN=wbp1 PE=2 SV=2)
142542	estExt_fgenesh1_pg.C_200123	AAA ATPase	2621	1.54399	-0.53484	0	0	1.24262e-132	3.54913e-131	COG0464(F:Nucleotide transport and metabolism)	COG0464(KTI12 homolog, chromatin associated (S. cerevisiae))	PF00004.29(AAA:ATPase family associated with various cellular activities (AAA)); PF17862.1(AAA_lid_3:AAA+ lid domain); PF02359.18(CDC48_N:Cell division protein 48 (CDC48), N-terminal domain); PF05496.12(RuvB_N:Holliday junction DNA helicase RuvB P-loop domain); PF07724.14(AAA_2:AAA domain (Cdc48 subfamily)); PF13191.6(AAA_16:AAA ATPase domain); PF13671.6(AAA_33:AAA domain); PF07728.14(AAA_5:AAA d…	sp|Q5AWS6|CDC48_EMENI(Cell division control protein 48 OS=Emericella nidulans (strain FGSC A4 / ATCC 38163 / CBS 112.46 / NRRL 194 / M139) OX=227321 GN=cdc48 PE=1 SV=2)
142703	estExt_fgenesh1_pg.C_230037	expressed protein	597	-0.896891	-0.146727	4.53e-16	1.63e-15	0.4046	0.513956
143065	estExt_fgenesh1_pg.C_300084	palmitoyl protein thioesterase	1190	1.10641	-0.198806	1.17e-46	8.6e-46	0.00367992	0.00823754	COG1075(S:Function unknown)	COG1075(Ribosomal L1 domain containing 1)	PF02089.15(Palm_thioest:Palmitoyl protein thioesterase)	sp|O88531|PPT1_MOUSE(Palmitoyl-protein thioesterase 1 OS=Mus musculus OX=10090 GN=Ppt1 PE=1 SV=2)
143111	estExt_fgenesh1_pg.C_320038	Protein prenylyltransferase	1092	2.7654	0.698639	3.44e-30	1.89e-29	1.67534e-05	5.12684e-05	COG5536(S:Function unknown)	COG5536(cleavage stimulation factor)	PF01239.22(PPTA:Protein prenyltransferase alpha subunit repeat)	sp|Q55DQ4|PGTA_DICDI(Geranylgeranyl transferase type-2 subunit alpha OS=Dictyostelium discoideum OX=44689 GN=rabggta PE=3 SV=2)
143287	estExt_fgenesh1_pg.C_410014	hypothetical protein	1947	0.774693	-0.0824622	3.5e-06	7.64e-06	0.53112	0.621285	COG0652(O:Posttranslational modification, protein turnover, chaperones)	COG0652(peptidyl-prolyl cis-trans isomerase activity)	PF00160.21(Pro_isomerase:Cyclophilin type peptidyl-prolyl cis-trans isomerase/CLD); PF04564.15(U-box:U-box domain); PF15906.5(zf-NOSIP:Zinc-finger of nitric oxide synthase-interacting protein)	sp|Q4IBK5|PPIL2_GIBZE(Peptidyl-prolyl cis-trans isomerase-like 2 OS=Gibberella zeae (strain PH-1 / ATCC MYA-4620 / FGSC 9075 / NRRL 31084) OX=229533 GN=CYP8 PE=3 SV=2)
143335	estExt_fgenesh1_pg.C_440020	hypothetical protein	1084	2.43604	0.175346	3.93e-82	4.33e-81	0.00865516	0.0180475	COG5152(S:Function unknown)	COG5152(Ring finger protein)	PF13920.6(zf-C3HC4_3:Zinc finger, C3HC4 type (RING finger)); PF00097.25(zf-C3HC4:Zinc finger, C3HC4 type (RING finger)); PF13445.6(zf-RING_UBOX:RING-type zinc-finger); PF14634.6(zf-RING_5:zinc-RING finger domain); PF13923.6(zf-C3HC4_2:Zinc finger, C3HC4 type (RING finger)); PF16685.5(zf-RING_10:zinc RING finger of MSL2); PF13639.6(zf-RING_2:Ring finger domain)	sp|Q7SDY3|CWC24_NEUCR(Pre-mRNA-splicing factor cwc-24 OS=Neurospora crassa (strain ATCC 24698 / 74-OR23-1A / CBS 708.71 / DSM 1257 / FGSC 987) OX=367110 GN=cwc-24 PE=3 SV=1)

## Sheet: Protein secretion
GeneID	Model Name	Description	Length	log2 Ratio 24 h (U5/C30)	log2 Ratio 48 h (U5/C30)	P-value 24 h	FDR 24 h	P-value 48 h	FDR 48 h	cog	cog_description	pfam	swissprot
4496	gm1.52_g	LexA/Signal peptidase	564	1.42572	0.301334	4.63e-07	1.07e-06	0.188666	0.274818	COG0681(J:Translation, ribosomal structure and biogenesis)	COG0681(translation initiation factor)	PF00717.23(Peptidase_S24:Peptidase S24-like)	sp|Q9UST2|IMP2L_SCHPO(Mitochondrial inner membrane protease subunit 2 OS=Schizosaccharomyces pombe (strain 972 / ATCC 24843) OX=284812 GN=SPBC336.13c PE=3 SV=1)
4752	gm1.308_g	zinc finger protein	789	1.20581	-0.12017	6.39e-07	1.46e-06	0.476276	0.584466	ENOG4111TX5(S:Function unknown)	ENOG4111TX5(zinc finger protein)		sp|Q8NB15|ZN511_HUMAN(Zinc finger protein 511 OS=Homo sapiens OX=9606 GN=ZNF511 PE=1 SV=2)
5475	gm1.1031_g	Exo70 exocyst complex subunit	1914	0.548711	-0.0481219	1.99e-05	4.1e-05	0.632814	0.713632	ENOG410YIGI(S:Function unknown)	ENOG410YIGI(exocyst complex)	PF03081.15(Exo70:Exo70 exocyst complex subunit)	sp|Q4ILI9|EXO70_GIBZE(Exocyst complex protein EXO70 OS=Gibberella zeae (strain PH-1 / ATCC MYA-4620 / FGSC 9075 / NRRL 31084) OX=229533 GN=EXO70 PE=3 SV=1)
5806	gm1.1362_g	EF-hand	1194	0.545142	0.4455	5.15e-12	1.57e-11	9.47062e-13	4.87437e-12	ENOG410XTDR(I:Lipid transport and metabolism)	ENOG410XTDR(Acyl-CoA binding domain containing)	PF12761.7(End3:Actin cytoskeleton-regulatory complex protein END3); PF12763.7(EF-hand_4:Cytoskeletal-regulatory complex EF hand); PF00036.32(EF-hand_1:EF hand); PF13499.6(EF-hand_7:EF-hand domain pair); PF13405.6(EF-hand_6:EF-hand domain)	sp|Q7S9V9|END3_NEUCR(Actin cytoskeleton-regulatory complex protein end-3 OS=Neurospora crassa (strain ATCC 24698 / 74-OR23-1A / CBS 708.71 / DSM 1257 / FGSC 987) OX=367110 GN=end-3 PE=3 SV=2)
6133	gm1.1689_g	hypothetical protein	4317	1.41048	0.244929	5.12e-39	3.35e-38	0.00212292	0.00495223	ENOG410ZU7R(S:Function unknown); ENOG4111BAC(S:Function unknown); ENOG410YBVS(U:Intracellular trafficking, secretion, and vesicular transport)	ENOG410ZU7R(-); ENOG4111BAC(Nuclear pore complex); ENOG410YBVS(nucleoporin 214kDa)	PF16755.5(NUP214:Nucleoporin or Nuclear pore complex subunit NUP214=Nup159); PF13634.6(Nucleoporin_FG:Nucleoporin FG repeat region); PF12894.7(ANAPC4_WD40:Anaphase-promoting complex subunit 4 WD40 domain)	sp|G0SBS8|NU159_CHATD(Nucleoporin NUP159 OS=Chaetomium thermophilum (strain DSM 1495 / CBS 144.50 / IMI 039719) OX=759272 GN=NUP159 PE=1 SV=1)
6185	gm1.1741_g	hypothetical protein	1104	0.753484	0.594401	2.82e-13	9.1e-13	9.78664e-12	4.78171e-11	ENOG4111P8A(S:Function unknown)	ENOG4111P8A(peroxisomal biogenesis factor 14)	PF04695.13(Pex14_N:Peroxisomal membrane anchor protein (Pex14p) conserved region)	sp|Q9HG09|PEX14_PICPA(Peroxisomal membrane protein PEX14 OS=Komagataella pastoris OX=4922 GN=PEX14 PE=1 SV=1)
7104	gm1.2660_g	golgi reassembly-stacking protein 2	1017	0.586919	0.55611	1.84e-05	3.8e-05	0.000159724	0.000439382	COG5233(U:Intracellular trafficking, secretion, and vesicular transport)	COG5233(Golgi reassembly stacking protein)	PF04495.14(GRASP55_65:GRASP55/65 PDZ-like domain)	sp|Q10149|YAT2_SCHPO(Uncharacterized protein C1D4.02c OS=Schizosaccharomyces pombe (strain 972 / ATCC 24843) OX=284812 GN=SPAC1D4.02c PE=3 SV=2)
7322	gm1.2878_g	SNARE domain-containing protein	966	0.267962	-0.0820198	0.0127534	0.0199007	0.407072	0.516741	ENOG410Y2MB(U:Intracellular trafficking, secretion, and vesicular transport)	ENOG410Y2MB(Syntaxin 5)	PF05739.19(SNARE:SNARE domain); PF11416.8(Syntaxin-5_N:Syntaxin-5 N-terminal, Sly1p-binding domain); PF00804.25(Syntaxin:Syntaxin)	sp|O13644|SED5_SCHPO(Integral membrane protein sed5 OS=Schizosaccharomyces pombe (strain 972 / ATCC 24843) OX=284812 GN=sed5 PE=3 SV=1)
7641	gm1.3197_g	Yip1-domain containing protein	786	0.870261	0.309186	1.7e-09	4.57e-09	0.0244596	0.0464496	COG5080(U:Intracellular trafficking, secretion, and vesicular transport)	COG5080(yip1 domain family member)	PF04893.17(Yip1:Yip1 domain)	sp|O94348|YIP1_SCHPO(Protein transport protein yip1 OS=Schizosaccharomyces pombe (strain 972 / ATCC 24843) OX=284812 GN=yip1 PE=3 SV=1)
7664	gm1.3220_g	hypothetical protein	885	-0.217932	0.221214	0.497348	0.564681	0.589924	0.677819	ENOG4111SKC(S:Function unknown)	ENOG4111SKC(COG (conserved oligomeric Golgi) complex component, COG2)	PF06148.11(COG2:COG (conserved oligomeric Golgi) complex component, COG2); PF08700.11(Vps51:Vps51/Vps67); PF10392.9(COG5:Golgi transport complex subunit 5); PF04124.12(Dor1:Dor1-like family)
7762	gm1.3318_g	putative exocyst complex component sec8	3168	1.56153	0.570845	1.37e-33	8.14e-33	4.82e-11	2.26994e-10	ENOG410Z8N0(U:Intracellular trafficking, secretion, and vesicular transport)	ENOG410Z8N0(Exocyst complex component)	PF04048.14(Sec8_exocyst:Sec8 exocyst complex component specific domain); PF10475.9(Vps54_N:Vacuolar-sorting protein 54, of GARP complex)	sp|Q9HE88|SEC8_NEUCR(Probable exocyst complex component sec8 OS=Neurospora crassa (strain ATCC 24698 / 74-OR23-1A / CBS 708.71 / DSM 1257 / FGSC 987) OX=367110 GN=sec8 PE=3 SV=1)
7909	gm1.3465_g	emp24/gp25L/p24 family protein	636	0.659322	0.721025	6.28e-28	3.28e-27	2.62902e-17	1.64496e-16	ENOG4111JPD(U:Intracellular trafficking, secretion, and vesicular transport)	ENOG4111JPD(Transmembrane emp24 protein transport domain containing)	PF01105.24(EMP24_GP25L:emp24/gp25L/p24 family/GOLD)	sp|O13770|YE98_SCHPO(Uncharacterized membrane protein C17A5.08 OS=Schizosaccharomyces pombe (strain 972 / ATCC 24843) OX=284812 GN=SPAC17A5.08 PE=3 SV=1)
8694	gm1.4250_g	SFT2-domain containing protein	648	1.30112	0.529357	6.57e-11	1.9e-10	8.56058e-05	0.000242188	COG5102(U:Intracellular trafficking, secretion, and vesicular transport)	COG5102(SFT2 domain containing)	PF04178.12(Got1:Got1/Sft2-like family)	sp|P38166|SFT2_YEAST(Protein transport protein SFT2 OS=Saccharomyces cerevisiae (strain ATCC 204508 / S288c) OX=559292 GN=SFT2 PE=1 SV=1)
8999	gm1.4555_g	Small COPII coat GTPase sar1	570	-0.386825	0.046788	3.87e-20	1.61e-19	0.321122	0.42684	ENOG410YIKI(U:Intracellular trafficking, secretion, and vesicular transport)	ENOG410YIKI(Small GTPase component of the coat protein complex II (COPII) which promotes the formation of transport vesicles from the endoplasmic reticulum (ER). The coat has two main functions, the physical deformation of the endoplasmic reticulum membrane into vesicles and the selection of cargo molecules. SAR1 controls the coat assembly in a stepwise manner. Activated SAR1-GTP binds to membran…	PF00025.21(Arf:ADP-ribosylation factor family); PF00503.20(G-alpha:G-protein alpha subunit); PF08477.13(Roc:Ras of Complex, Roc, domain of DAPkinase); PF00071.22(Ras:Ras family); PF01926.23(MMR_HSR1:50S ribosome-binding GTPase); PF09439.10(SRPRB:Signal recognition particle receptor beta subunit); PF04670.12(Gtr1_RagA:Gtr1/RagA G protein conserved region)	sp|P78976|SAR1_HYPJE(Small COPII coat GTPase sar1 OS=Hypocrea jecorina OX=51453 GN=sar1 PE=3 SV=1)
10306	gm1.5862_g	mitochondrial import inner membrane translocase subunit tim23	732	1.76099	-0.237392	5.78e-58	4.97e-57	0.0146317	0.0291814	COG5596(H:Coenzyme transport and metabolism)	COG5596(Catalyzes the phosphorylation of the 3'-hydroxyl group of dephosphocoenzyme A to form coenzyme A (By similarity))	PF02466.19(Tim17:Tim17/Tim22/Tim23/Pmp24 family)	sp|Q9USM7|TIM23_SCHPO(Mitochondrial import inner membrane translocase subunit tim23 OS=Schizosaccharomyces pombe (strain 972 / ATCC 24843) OX=284812 GN=tim23 PE=3 SV=1)
10742	gm1.6298_g	Vacuolar protein sorting-associated protein 13	9645	0.889777	-0.205609	1.47e-28	7.81e-28	0.00060973	0.00154292	COG5043(U:Intracellular trafficking, secretion, and vesicular transport)	COG5043(Vacuolar Protein)	PF06650.12(SHR-BD:SHR-binding domain of vacuolar-sorting associated protein 13); PF16910.5(VPS13_mid_rpt:Repeating coiled region of VPS13); PF16908.5(VPS13:Vacuolar sorting-associated protein 13, N-terminal); PF16909.5(VPS13_C:Vacuolar-sorting-associated 13 protein C-terminal); PF12624.7(Chorein_N:N-terminal region of Chorein or VPS13); PF09333.11(ATG_C:Autophagy-related protein C terminal domain)	sp|Q07878|VPS13_YEAST(Vacuolar protein sorting-associated protein 13 OS=Saccharomyces cerevisiae (strain ATCC 204508 / S288c) OX=559292 GN=VPS13 PE=1 SV=1)
10981	gm1.6537_g	hypothetical protein	1686	-0.415037	0.634716	0.0387316	0.0561867	0.0399802	0.0718123	ENOG4112CAB(S:Function unknown); ENOG410Y73Z(S:Function unknown)	ENOG4112CAB(-); ENOG410Y73Z(-)	PF00170.21(bZIP_1:bZIP transcription factor)	sp|C5H883|RADR_CHACV(Transcription factor radR OS=Chaetomium chiversii OX=155873 GN=radR PE=3 SV=1)
11141	gm1.6697_g	Phosphatidylinositol 3-kinase	2739	1.18943	0.107803	1.33e-23	6.14e-23	0.266376	0.364328	COG5032(S:Function unknown)	COG5032(Conserved hypothetical, protein)	PF00613.20(PI3Ka:Phosphoinositide 3-kinase family, accessory domain (PIK domain)); PF00454.27(PI3_PI4_kinase:Phosphatidylinositol 3- and 4-kinase); PF00792.24(PI3K_C2:Phosphoinositide 3-kinase C2)	sp|Q8NEB9|PK3C3_HUMAN(Phosphatidylinositol 3-kinase catalytic subunit type 3 OS=Homo sapiens OX=9606 GN=PIK3C3 PE=1 SV=1)
11480	gm1.7036_g	Endoplasmic oxidoreductin	1758	-0.982723	-0.638771	8.66e-186	1.7e-184	1.09878e-51	1.44639e-50	COG5061(O:Posttranslational modification, protein turnover, chaperones); COG5061(U:Intracellular trafficking, secretion, and vesicular transport)	COG5061(S. cerevisiae); COG5061(S. cerevisiae)	PF04137.15(ERO1:Endoplasmic Reticulum Oxidoreductin 1 (ERO1))	sp|Q7SEY9|ERO1_NEUCR(Endoplasmic reticulum oxidoreductin-1 OS=Neurospora crassa (strain ATCC 24698 / 74-OR23-1A / CBS 708.71 / DSM 1257 / FGSC 987) OX=367110 GN=ero-1 PE=3 SV=1)
12280	gm1.7836_g	secretion pathway protein Sls2/Rcy1	2763	1.08772	0.0694519	5.63e-30	3.08e-29	0.387402	0.497091	ENOG410XSQQ(T:Signal transduction mechanisms)	ENOG410XSQQ(Cyclin-Dependent Kinase)	PF07393.11(Sec10:Exocyst complex component Sec10); PF12937.7(F-box-like:F-box-like); PF00646.33(F-box:F-box domain)	sp|O74854|POF6_SCHPO(F-box protein pof6 OS=Schizosaccharomyces pombe (strain 972 / ATCC 24843) OX=284812 GN=pof6 PE=1 SV=1)
12500	gm1.8056_g	Synaptobrevin-domain containing protein	702	0.418329	-0.141517	0.00522918	0.00855974	0.174491	0.257247	COG5143(S:Function unknown)	COG5143(Conserved hypothetical, protein)	PF00957.21(Synaptobrevin:Synaptobrevin); PF13774.6(Longin:Regulated-SNARE-like domain)	sp|Q9FMR5|VA714_ARATH(Vesicle-associated membrane protein 714 OS=Arabidopsis thaliana OX=3702 GN=VAMP714 PE=1 SV=1)
12855	gm1.8411_g	Tim10/DDP family zinc finger protein	282	1.09563	0.360516	7.87e-12	2.37e-11	0.0594994	0.101889	ENOG41126D5(O:Posttranslational modification, protein turnover, chaperones)	ENOG41126D5(mitochondrial intermembrane chaperone that participates in the import and insertion of some multi-pass transmembrane proteins into the mitochondrial inner membrane. Also required for the transfer of beta-barrel precursors from the TOM complex to the sorting and assembly machinery (SAM complex) of the outer membrane. Acts as a chaperone-like protein that protects the hydrophobic precur…	PF02953.15(zf-Tim10_DDP:Tim10/DDP family zinc finger)	sp|Q4IJW4|TIM8_GIBZE(Mitochondrial import inner membrane translocase subunit TIM8 OS=Gibberella zeae (strain PH-1 / ATCC MYA-4620 / FGSC 9075 / NRRL 31084) OX=229533 GN=TIM8 PE=3 SV=1)
23080	estExt_Genemark1.C_1_t10006	ARM repeat-containing protein	2203	0.858745	0.0473341	1.46e-49	1.12e-48	0.267916	0.365732	COG5064(U:Intracellular trafficking, secretion, and vesicular transport)	COG5064(importin subunit alpha)	PF00514.23(Arm:Armadillo/beta-catenin-like repeat); PF01749.20(IBB:Importin beta binding domain); PF16186.5(Arm_3:Atypical Arm repeat); PF13513.6(HEAT_EZ:HEAT-like repeat); PF13646.6(HEAT_2:HEAT repeats); PF02985.22(HEAT:HEAT repeat); PF01602.20(Adaptin_N:Adaptin N terminal region)	sp|B6HJ92|KAPA_PENRW(Importin subunit alpha OS=Penicillium rubens (strain ATCC 28089 / DSM 1075 / NRRL 1951 / Wisconsin 54-1255) OX=500485 GN=kapA PE=1 SV=1)
23223	estExt_Genemark1.C_1_t10321	hypothetical protein	4691	0.802703	0.310036	2.67e-50	2.07e-49	4.72932e-12	2.34038e-11	ENOG410ZK3V(Z:Cytoskeleton); ENOG410XTDR(S:Function unknown)	ENOG410ZK3V(EH); ENOG410XTDR(Epidermal growth factor receptor pathway substrate)	PF12763.7(EF-hand_4:Cytoskeletal-regulatory complex EF hand); PF02205.20(WH2:WH2 motif)	sp|Q2H922|PAN1_CHAGB(Actin cytoskeleton-regulatory complex protein PAN1 OS=Chaetomium globosum (strain ATCC 6205 / CBS 148.51 / DSM 1962 / NBRC 6347 / NRRL 1970) OX=306901 GN=PAN1 PE=3 SV=1)
23384	estExt_Genemark1.C_1_t20179	Probable cysteine protease atg4	1728	0.821704	-0.130752	2.59e-20	1.08e-19	0.074544	0.123914	ENOG410XPQ0(O:Posttranslational modification, protein turnover, chaperones)	ENOG410XPQ0(Cysteine peptidase)	PF03416.19(Peptidase_C54:Peptidase family C54)	sp|A0A098DRK7|ATG4_GIBZE(Cysteine protease ATG4 OS=Gibberella zeae (strain PH-1 / ATCC MYA-4620 / FGSC 9075 / NRRL 31084) OX=229533 GN=ATG4 PE=3 SV=1)
23475	estExt_Genemark1.C_1_t20341	Cornichon	1184	0.759353	-0.367044	4.21e-48	3.16e-47	1.16881e-14	6.58319e-14	ENOG4111MWH(U:Intracellular trafficking, secretion, and vesicular transport)	ENOG4111MWH(cornichon homolog)	PF03311.14(Cornichon:Cornichon protein)	sp|P53173|ERV14_YEAST(ER-derived vesicles protein ERV14 OS=Saccharomyces cerevisiae (strain ATCC 204508 / S288c) OX=559292 GN=ERV14 PE=1 SV=3)
24033	estExt_Genemark1.C_3_t10302	hypothetical protein	1920	0.506991	0.145006	6.17e-06	1.32e-05	0.113599	0.1797	ENOG410XP6D(S:Function unknown)	ENOG410XP6D(asparagine-linked glycosylation 9, alpha-1,2-mannosyltransferase homolog (S. cerevisiae))	PF03901.17(Glyco_transf_22:Alg9-like mannosyltransferase family)	sp|Q9P7Q9|ALG9_SCHPO(Alpha-1,2-mannosyltransferase alg9 OS=Schizosaccharomyces pombe (strain 972 / ATCC 24843) OX=284812 GN=alg9 PE=3 SV=1)
24187	estExt_Genemark1.C_40183	Mitochondrial import translocase%2C subunit Tom22	678	1.46945	-0.360427	3.24e-78	3.44e-77	1.02071e-05	3.19976e-05	ENOG41122K3(U:Intracellular trafficking, secretion, and vesicular transport)	ENOG41122K3(mitochondrial import receptor subunit TOM22)	PF04281.13(Tom22:Mitochondrial import receptor subunit Tom22)	sp|Q07335|TOM22_NEUCR(Mitochondrial import receptor subunit tom22 OS=Neurospora crassa (strain ATCC 24698 / 74-OR23-1A / CBS 708.71 / DSM 1257 / FGSC 987) OX=367110 GN=tom22 PE=2 SV=1)
24347	estExt_Genemark1.C_50140	hypothetical protein	706	-0.120729	-0.130439	0.132658	0.174303	0.111512	0.176762	COG5491(L:Replication, recombination and repair)	COG5491(helicase)	PF03357.21(Snf7:Snf7); PF03398.14(Ist1:Regulator of Vps4 activity in the MVB pathway)	sp|O60074|DID2_SCHPO(Vacuolar protein-sorting-associated protein 46 OS=Schizosaccharomyces pombe (strain 972 / ATCC 24843) OX=284812 GN=did2 PE=3 SV=2)
24401	estExt_Genemark1.C_50260	ARM repeat-containing protein	3283	0.439788	-0.206355	3.55e-10	9.89e-10	0.000614592	0.00155352	COG5656(O:Posttranslational modification, protein turnover, chaperones)	COG5656(Importin)	PF03810.19(IBN_N:Importin-beta N-terminal domain); PF08506.10(Cse1:Cse1); PF08389.12(Xpo1:Exportin 1-like protein)	sp|O59809|IMA3_SCHPO(Probable importin c550.11 OS=Schizosaccharomyces pombe (strain 972 / ATCC 24843) OX=284812 GN=SPCC550.11 PE=3 SV=1)
24755	estExt_Genemark1.C_70328	vacuolar protein sorting-associated protein 74	1272	0.25564	0.0926256	0.0165636	0.0253942	0.327124	0.433263	ENOG410XRT6(U:Intracellular trafficking, secretion, and vesicular transport)	ENOG410XRT6(Golgi phosphoprotein)	PF05719.11(GPP34:Golgi phosphoprotein 3 (GPP34))	sp|O14205|VPS74_SCHPO(Vacuolar protein sorting-associated protein 74 OS=Schizosaccharomyces pombe (strain 972 / ATCC 24843) OX=284812 GN=vps74 PE=1 SV=2)
24964	estExt_Genemark1.C_90012	hypothetical protein	3141	1.15014	0.883095	5.64e-36	3.49e-35	5.32094e-23	4.01631e-22	ENOG410XRCG(U:Intracellular trafficking, secretion, and vesicular transport)	ENOG410XRCG(USO1 vesicle docking protein homolog (yeast))	PF04869.14(Uso1_p115_head:Uso1 / p115 like vesicle tethering protein, head region); PF04871.13(Uso1_p115_C:Uso1 / p115 like vesicle tethering protein, C terminal region)	sp|P25386|USO1_YEAST(Intracellular protein transport protein USO1 OS=Saccharomyces cerevisiae (strain ATCC 204508 / S288c) OX=559292 GN=USO1 PE=1 SV=2)
25045	estExt_Genemark1.C_90160	BAR-domain containing protein	1407	-0.506518	-0.322534	1.58e-27	8.18e-27	2.96354e-11	1.41437e-10	ENOG410XRQB(S:Function unknown); ENOG410ZBW1(S:Function unknown)	ENOG410XRQB(Reduced viability upon starvation protein); ENOG410ZBW1(bridging integrator)	PF03114.18(BAR:BAR domain); PF00018.28(SH3_1:SH3 domain); PF14604.6(SH3_9:Variant SH3 domain); PF07653.17(SH3_2:Variant SH3 domain)	sp|Q59LF3|RV167_CANAL(Regulator of cytoskeleton and endocytosis RVS167 OS=Candida albicans (strain SC5314 / ATCC MYA-2876) OX=237561 GN=RVS167 PE=3 SV=2)
25236	estExt_Genemark1.C_110026	hypothetical protein	806	0.431682	0.533172	2.78e-13	8.99e-13	8.98614e-11	4.16413e-10	ENOG410XPUW(U:Intracellular trafficking, secretion, and vesicular transport)	ENOG410XPUW(COPI coating of Golgi vesicle)	PF01105.24(EMP24_GP25L:emp24/gp25L/p24 family/GOLD)	sp|O14324|YB79_SCHPO(Uncharacterized membrane protein C16E9.09c OS=Schizosaccharomyces pombe (strain 972 / ATCC 24843) OX=284812 GN=SPBC16E9.09c PE=3 SV=1)
25282	estExt_Genemark1.C_110130	t-SNARE	1445	-0.0175453	0.262214	0.6025	0.658402	4.05326e-11	1.92551e-10	COG5074(U:Intracellular trafficking, secretion, and vesicular transport)	COG5074(translocase of outer mitochondrial membrane 70 homolog A (S. cerevisiae))	PF00804.25(Syntaxin:Syntaxin); PF05739.19(SNARE:SNARE domain); PF14523.6(Syntaxin_2:Syntaxin-like protein)	sp|Q9USH7|PSY1_SCHPO(Syntaxin-like protein psy1 OS=Schizosaccharomyces pombe (strain 972 / ATCC 24843) OX=284812 GN=psy1 PE=3 SV=1)
25529	estExt_Genemark1.C_130116	GARP complex subunit Vps53	2544	1.8178	0.226907	8.66e-35	5.27e-34	0.0299794	0.0555971	ENOG410XNMT(U:Intracellular trafficking, secretion, and vesicular transport)	ENOG410XNMT(Vacuolar Protein)	PF04100.12(Vps53_N:Vps53-like, N-terminal); PF10475.9(Vps54_N:Vacuolar-sorting protein 54, of GARP complex); PF10474.9(DUF2451:Protein of unknown function C-terminus (DUF2451)); PF04437.13(RINT1_TIP1:RINT-1 / TIP-1 family); PF06248.13(Zw10:Centromere/kinetochore Zw10)	sp|Q5ZLD7|VPS53_CHICK(Vacuolar protein sorting-associated protein 53 homolog OS=Gallus gallus OX=9031 GN=VPS53 PE=2 SV=1)
25602	estExt_Genemark1.C_140036	protein transport protein SEC13	990	1.07067	0.773603	1.64e-45	1.19e-44	5.62276e-22	4.13946e-21	ENOG410XPFM(U:Intracellular trafficking, secretion, and vesicular transport)	ENOG410XPFM(Component of the coat protein complex II (COPII) which promotes the formation of transport vesicles from the endoplasmic reticulum (ER). The coat has two main functions, the physical deformation of the endoplasmic reticulum membrane into vesicles and the selection of cargo molecules. It also functions as a component of the nuclear pore complex (NPC). NPC components, collectively refer…	PF00400.32(WD40:WD domain, G-beta repeat); PF12894.7(ANAPC4_WD40:Anaphase-promoting complex subunit 4 WD40 domain)	sp|A2QHM1|SEC13_ASPNC(Protein transport protein sec13 OS=Aspergillus niger (strain CBS 513.88 / FGSC A1513) OX=425011 GN=sec13 PE=3 SV=1)
25976	estExt_Genemark1.C_180041	t-SNARE	1290	0.352758	0.142422	0.000736348	0.00132007	0.109985	0.17464	COG5325(U:Intracellular trafficking, secretion, and vesicular transport)	COG5325(Adaptor-related protein complex)	PF05739.19(SNARE:SNARE domain)	sp|Q9P6P1|TLG2_SCHPO(t-SNARE affecting a late Golgi compartment protein 2 OS=Schizosaccharomyces pombe (strain 972 / ATCC 24843) OX=284812 GN=tlg2 PE=3 SV=1)
26016	estExt_Genemark1.C_180114	Vps5-domain containing protein	1802	0.899587	0.362638	9.38e-42	6.42e-41	1.76017e-09	7.47869e-09	COG5391(S:Function unknown)	COG5391(mitochondrial 54S ribosomal protein YmL36)	PF09325.10(Vps5:Vps5 C terminal like); PF00787.24(PX:PX domain)	sp|Q9C0U7|VPS5_SCHPO(Vacuolar protein sorting-associated protein vps5 OS=Schizosaccharomyces pombe (strain 972 / ATCC 24843) OX=284812 GN=vps5 PE=1 SV=1)
26481	estExt_Genemark1.C_260009	protein MSF1	684	-0.682435	-1.19065	1.76e-31	9.94e-31	1.39911e-137	4.11029e-136	ENOG410YBNZ(S:Function unknown)	ENOG410YBNZ(Slowmo homolog)	PF04707.14(PRELI:PRELI-like family)	sp|P35200|UPS2_YEAST(Protein UPS2, mitochondrial OS=Saccharomyces cerevisiae (strain ATCC 204508 / S288c) OX=559292 GN=UPS2 PE=1 SV=1)
26505	estExt_Genemark1.C_260053	putative COPII-coated vesicle protein	1369	1.28958	0.493006	8.6e-123	1.27e-121	2.41472e-14	1.34695e-13	ENOG410XP7X(G:Carbohydrate transport and metabolism)	ENOG410XP7X(hydrolase family 76 protein)	PF07970.12(COPIIcoated_ERV:Endoplasmic reticulum vesicle transporter); PF13850.6(ERGIC_N:Endoplasmic Reticulum-Golgi Intermediate Compartment (ERGIC))	sp|O94283|ERV41_SCHPO(ER-derived vesicles protein 41 OS=Schizosaccharomyces pombe (strain 972 / ATCC 24843) OX=284812 GN=erv41 PE=1 SV=1)
26568	estExt_Genemark1.C_270073	Coatomer%2C beta subunit	3495	0.735284	0.410619	7.15e-71	7.1e-70	7.91046e-19	5.30075e-18	COG5096(A:RNA processing and modification)	COG5096(Mago nashi)	PF01602.20(Adaptin_N:Adaptin N terminal region); PF07718.12(Coatamer_beta_C:Coatomer beta C-terminal region); PF14806.6(Coatomer_b_Cpla:Coatomer beta subunit appendage platform); PF12717.7(Cnd1:non-SMC mitotic condensation complex subunit 1); PF13646.6(HEAT_2:HEAT repeats); PF16381.5(Coatomer_g_Cpla:Coatomer subunit gamma-1 C-terminal appendage platform)	sp|Q9UUF7|COPB_SCHPO(Coatomer subunit beta OS=Schizosaccharomyces pombe (strain 972 / ATCC 24843) OX=284812 GN=sec26 PE=3 SV=1)
26586	estExt_Genemark1.C_270113	VPS9 domain protein	4029	0.733109	0.078817	8.04e-14	2.65e-13	0.239226	0.334007	ENOG4110ZFR(S:Function unknown)	ENOG4110ZFR((VPS9) domain protein)	PF02204.18(VPS9:Vacuolar sorting protein 9 (VPS9) domain); PF13857.6(Ank_5:Ankyrin repeats (many copies)); PF12796.7(Ank_2:Ankyrin repeats (3 copies)); PF13637.6(Ank_4:Ankyrin repeats (many copies))	sp|Q6C5F1|U507_YARLI(UPF0507 protein YALI0E18612g OS=Yarrowia lipolytica (strain CLIB 122 / E 150) OX=284591 GN=YALI0E18612g PE=3 SV=1)
26597	estExt_Genemark1.C_280022	putative dynamin GTPase	2815	1.23417	0.170278	3.05e-81	3.35e-80	0.00266702	0.00613488	COG0699(U:Intracellular trafficking, secretion, and vesicular transport)	COG0699(Cation efflux family protein)	PF00350.23(Dynamin_N:Dynamin family); PF01031.20(Dynamin_M:Dynamin central region)	sp|P87320|MSP1_SCHPO(Protein msp1, mitochondrial OS=Schizosaccharomyces pombe (strain 972 / ATCC 24843) OX=284812 GN=msp1 PE=3 SV=2)
26608	estExt_Genemark1.C_280038	AP-3 complex subunit delta	3120	0.500845	0.199914	6.51e-06	1.39e-05	0.0524606	0.0915291	ENOG410XQFB(U:Intracellular trafficking, secretion, and vesicular transport)	ENOG410XQFB(Adaptor-related protein complex 3, delta 1 subunit)	PF01602.20(Adaptin_N:Adaptin N terminal region); PF12717.7(Cnd1:non-SMC mitotic condensation complex subunit 1)	sp|Q9UTL8|AP3D_SCHPO(AP-3 complex subunit delta OS=Schizosaccharomyces pombe (strain 972 / ATCC 24843) OX=284812 GN=apl5 PE=3 SV=2)
26742	estExt_Genemark1.C_310016	BAR-domain containing protein	965	-0.335412	-0.0325579	8.02e-11	2.31e-10	0.520876	0.611699	ENOG410XTDS(S:Function unknown)	ENOG410XTDS(Reduced viability upon starvation protein 161)	PF03114.18(BAR:BAR domain)	sp|Q9UUM7|HOB3_SCHPO(Protein hob3 OS=Schizosaccharomyces pombe (strain 972 / ATCC 24843) OX=284812 GN=hob3 PE=1 SV=1)
26880	estExt_Genemark1.C_370022	hypothetical protein	6417	0.227116	-0.118193	9.67e-09	2.47e-08	0.00119077	0.00288618	ENOG410XPV4(U:Intracellular trafficking, secretion, and vesicular transport)	ENOG410XPV4(nuclear pore complex protein)	PF12110.8(Nup96:Nuclear protein 96); PF04096.14(Nucleoporin2:Nucleoporin autopeptidase); PF13634.6(Nucleoporin_FG:Nucleoporin FG repeat region)	sp|G0SAK3|NU145_CHATD(Nucleoporin NUP145 OS=Chaetomium thermophilum (strain DSM 1495 / CBS 144.50 / IMI 039719) OX=759272 GN=NUP145 PE=1 SV=1)
26951	estExt_Genemark1.C_400027	hypothetical protein	1053	-0.166171	-0.0716572	0.0015892	0.00275683	0.266212	0.364158	ENOG411110V(S:Function unknown)	ENOG411110V(PRELI domain containing 1)	PF04707.14(PRELI:PRELI-like family)	sp|Q05776|UPS1_YEAST(Protein UPS1, mitochondrial OS=Saccharomyces cerevisiae (strain ATCC 204508 / S288c) OX=559292 GN=UPS1 PE=1 SV=1)
31928	fgenesh1_pg.1_#_417	Signal recognition particle%2C SRP19 subunit	936	0.137589	0.603812	0.209476	0.265663	6.60324e-09	2.69547e-08	COG1400(U:Intracellular trafficking, secretion, and vesicular transport)	COG1400(Involved in targeting and insertion of nascent membrane proteins into the cytoplasmic membrane. Binds directly to 7S RNA and mediates binding of the 54 kDa subunit of the SRP (By similarity))	PF01922.17(SRP19:SRP19 protein)	sp|P41922|SEC65_YARLI(Signal recognition particle SEC65 subunit OS=Yarrowia lipolytica (strain CLIB 122 / E 150) OX=284591 GN=SEC65 PE=3 SV=1)
32021	fgenesh1_pg.1_#_510	Vacuolar protein sorting-associated protein 35	2682	0.663886	-0.25641	1.13e-31	6.41e-31	2.22806e-07	8.09838e-07	ENOG410XNXC(U:Intracellular trafficking, secretion, and vesicular transport)	ENOG410XNXC(Vacuolar Protein)	PF03635.17(Vps35:Vacuolar protein sorting-associated protein 35)	sp|Q96QK1|VPS35_HUMAN(Vacuolar protein sorting-associated protein 35 OS=Homo sapiens OX=9606 GN=VPS35 PE=1 SV=2)
32578	fgenesh1_pg.2_#_106	exocyst complex component Sec5	3114	-0.0265731	-0.387596	0.775992	0.813097	1.81021e-05	5.52496e-05	ENOG410XSY3(S:Function unknown)	ENOG410XSY3(exocytosis)	PF15469.6(Sec5:Exocyst complex component Sec5); PF08700.11(Vps51:Vps51/Vps67)	sp|P89102|SEC5_YEAST(Exocyst complex component SEC5 OS=Saccharomyces cerevisiae (strain ATCC 204508 / S288c) OX=559292 GN=SEC5 PE=1 SV=1)
33565	fgenesh1_pg.3_#_443	ARM repeat-containing protein	2343	0.74	-0.336126	8.28e-08	2e-07	0.00401878	0.00895061	COG5096(U:Intracellular trafficking, secretion, and vesicular transport)	COG5096(The coatomer is a cytosolic protein complex that binds to dilysine motifs and reversibly associates with Golgi non- clathrin-coated vesicles, which further mediate biosynthetic protein transport from the ER, via the Golgi up to the trans Golgi network. Coatomer complex is required for budding from Golgi membranes, and is essential for the retrograde Golgi-to-ER transport of dilysine-tagge…	PF01602.20(Adaptin_N:Adaptin N terminal region); PF12717.7(Cnd1:non-SMC mitotic condensation complex subunit 1); PF02985.22(HEAT:HEAT repeat)	sp|Q9JME5|AP3B2_MOUSE(AP-3 complex subunit beta-2 OS=Mus musculus OX=10090 GN=Ap3b2 PE=1 SV=2)
34657	fgenesh1_pg.6_#_232	DNase I-like protein	3645	-0.0155011	-0.398179	0.83278	0.864157	6.15936e-08	2.33793e-07	COG5411(T:Signal transduction mechanisms)	COG5411(inositol)	PF03372.23(Exo_endo_phos:Endonuclease/Exonuclease/phosphatase family)	sp|O14306|YE8A_SCHPO(Probable inositol polyphosphate 5-phosphatase C9G1.10c OS=Schizosaccharomyces pombe (strain 972 / ATCC 24843) OX=284812 GN=SPAC9G1.10c PE=1 SV=2)
34848	fgenesh1_pg.7_#_16	TRAUB-domain containing protein	1680	0.0543398	-0.997908	0.759956	0.798313	2.92644e-08	1.13739e-07	ENOG410XWGK(K:Transcription)	ENOG410XWGK(apoptosis antagonizing transcription factor)	PF08164.12(TRAUB:Apoptosis-antagonizing transcription factor, C-terminal); PF13339.6(AATF-Che1:Apoptosis antagonizing transcription factor)	sp|Q4I327|BFR2_GIBZE(Protein BFR2 OS=Gibberella zeae (strain PH-1 / ATCC MYA-4620 / FGSC 9075 / NRRL 31084) OX=229533 GN=BFR2 PE=3 SV=1)
34906	fgenesh1_pg.7_#_74	RINT-1 family protein	2379	1.272	0.327145	5.28e-34	3.17e-33	0.000721918	0.00180949	ENOG410XZD1(S:Function unknown)	ENOG410XZD1(RAD50 interactor 1)	PF04437.13(RINT1_TIP1:RINT-1 / TIP-1 family)
34911	fgenesh1_pg.7_#_79	Sec34-like family protein	2301	1.50517	0.0855981	2.38e-31	1.34e-30	0.454752	0.563734	ENOG410XNXH(U:Intracellular trafficking, secretion, and vesicular transport)	ENOG410XNXH(Component of oligomeric Golgi complex 3)	PF04136.15(Sec34:Sec34-like family); PF13324.6(GCIP:Grap2 and cyclin-D-interacting)	sp|Q96JB2|COG3_HUMAN(Conserved oligomeric Golgi complex subunit 3 OS=Homo sapiens OX=9606 GN=COG3 PE=1 SV=3)
35993	fgenesh1_pg.10_#_222	hypothetical protein	2226	-1.72583	-2.60962	0.0142454	0.0220327	6.85946e-06	2.19039e-05	COG0699(S:Function unknown)	COG0699(-)	PF00350.23(Dynamin_N:Dynamin family); PF01031.20(Dynamin_M:Dynamin central region); PF01926.23(MMR_HSR1:50S ribosome-binding GTPase); PF02212.18(GED:Dynamin GTPase effector domain)	sp|Q7T2P0|MX1_ICTPU(Interferon-induced GTP-binding protein Mx1 OS=Ictalurus punctatus OX=7998 GN=mx1 PE=2 SV=1)
36045	fgenesh1_pg.11_#_15	putative GARP complex component	3087	0.999152	0.510377	3.49e-18	1.35e-17	1.19536e-07	4.44968e-07	ENOG410XQ3K(U:Intracellular trafficking, secretion, and vesicular transport)	ENOG410XQ3K(vacuolar protein sorting 54 homolog (S. cerevisiae))	PF07928.12(Vps54:Vps54-like protein); PF10474.9(DUF2451:Protein of unknown function C-terminus (DUF2451)); PF10475.9(Vps54_N:Vacuolar-sorting protein 54, of GARP complex)	sp|O14093|VPS54_SCHPO(Vacuolar protein sorting-associated protein 54 OS=Schizosaccharomyces pombe (strain 972 / ATCC 24843) OX=284812 GN=vps54 PE=1 SV=1)
37178	fgenesh1_pg.16_#_53	vacuolar transporter chaperone 1	402	-0.625094	0.0183015	2.72e-05	5.54e-05	0.909468	0.942677	COG5264(S:Function unknown)	COG5264(Dynein light chain tctex1)	PF02656.15(DUF202:Domain of unknown function (DUF202))	sp|P40046|VTC1_YEAST(Vacuolar transporter chaperone 1 OS=Saccharomyces cerevisiae (strain ATCC 204508 / S288c) OX=559292 GN=VTC1 PE=1 SV=3)
37219	fgenesh1_pg.16_#_94	signal peptidase subunit family protein	711	1.02027	1.012	2.61e-34	1.58e-33	5.15e-10	2.26082e-09	ENOG4110TZP(U:Intracellular trafficking, secretion, and vesicular transport)	ENOG4110TZP(signal peptidase)	PF04573.12(SPC22:Signal peptidase subunit)	sp|Q12133|SPC3_YEAST(Signal peptidase complex subunit SPC3 OS=Saccharomyces cerevisiae (strain ATCC 204508 / S288c) OX=559292 GN=SPC3 PE=1 SV=1)
38233	fgenesh1_pg.22_#_68	Snf7-domain containing protein	675	0.00138365	-0.356449	0.95639	0.974673	1.21868e-12	6.21361e-12	ENOG410YE9I(U:Intracellular trafficking, secretion, and vesicular transport)	ENOG410YE9I(Charged multivesicular body protein)	PF03357.21(Snf7:Snf7)	sp|P0C149|SNF7_MAGO7(Vacuolar-sorting protein SNF7 OS=Magnaporthe oryzae (strain 70-15 / ATCC MYA-4617 / FGSC 8958) OX=242507 GN=SNF7 PE=3 SV=1)
39608	fgenesh1_pg.38_#_17	membrin	738	0.708323	1.24609	1.28e-08	3.24e-08	4.43284e-25	3.54244e-24	ENOG4111M37(U:Intracellular trafficking, secretion, and vesicular transport)	ENOG4111M37(GOlgi Snap Receptor complex member)	PF12352.8(V-SNARE_C:Snare region anchored in the vesicle membrane C-terminus); PF03908.13(Sec20:Sec20)	sp|Q6BZQ6|BOS1_YARLI(Protein transport protein BOS1 OS=Yarrowia lipolytica (strain CLIB 122 / E 150) OX=284591 GN=BOS1 PE=3 SV=1)
45488	gw1.40.31.1	hypothetical protein	6306	0.681987	0.297338	4.46e-17	1.67e-16	2.90336e-09	1.21354e-08	ENOG410XRAR(U:Intracellular trafficking, secretion, and vesicular transport)	ENOG410XRAR(Autophagy related)	PF13329.6(ATG2_CAD:Autophagy-related protein 2 CAD motif); PF09333.11(ATG_C:Autophagy-related protein C terminal domain); PF12624.7(Chorein_N:N-terminal region of Chorein or VPS13)	sp|I1S0P7|ATG2_GIBZE(Autophagy-related protein 2 OS=Gibberella zeae (strain PH-1 / ATCC MYA-4620 / FGSC 9075 / NRRL 31084) OX=229533 GN=ATG2 PE=3 SV=1)
50618	gw1.13.296.1	Phox-like protein	417	0.644166	0.437771	0.00018965	0.000359279	0.0124587	0.0251786	ENOG4111T1H(S:Function unknown)	ENOG4111T1H(PX domain-containing protein)	PF00787.24(PX:PX domain)	sp|Q6BIS2|YPT35_DEBHA(PX domain-containing protein YPT35 OS=Debaryomyces hansenii (strain ATCC 36239 / CBS 767 / JCM 1990 / NBRC 0083 / IGC 2968) OX=284592 GN=YPT35 PE=3 SV=2)
51070	gw1.10.286.1	hypothetical protein	510	0.684277	0.153439	0.0487752	0.0695394	0.629986	0.711396	ENOG410XTDR(S:Function unknown)	ENOG410XTDR(protein regulator of cytokinesis)	PF12763.7(EF-hand_4:Cytoskeletal-regulatory complex EF hand)	sp|A1DDY6|IRS4_NEOFI(Increased rDNA silencing protein 4 OS=Neosartorya fischeri (strain ATCC 1020 / DSM 3700 / CBS 544.65 / FGSC A1164 / JCM 1740 / NRRL 181 / WB 181) OX=331117 GN=irs4 PE=3 SV=1)
54287	gw1.7.681.1	hypothetical protein	1410	-1.06128	-0.141706	1.1e-32	6.4e-32	0.0906472	0.147451	ENOG410XQ9Y(S:Function unknown)	ENOG410XQ9Y(folliculin)	PF11704.8(Folliculin:Vesicle coat protein involved in Golgi to plasma membrane transport)
55923	gw1.17.339.1	hypothetical protein	1074	-2.28143	-2.06456	1.51e-13	4.92e-13	1.10588e-12	5.66342e-12	ENOG4111H1Y(S:Function unknown)	ENOG4111H1Y(Conserved hypothetical, protein)	PF11911.8(DUF3429:Protein of unknown function (DUF3429)); PF05262.11(Borrelia_P83:Borrelia P83/100 protein)
56216	gw1.25.201.1	hypothetical protein	1587	2.1592	0.282639	0.00318954	0.00534777	0.554158	0.644324	ENOG410YQXA(S:Function unknown)	ENOG410YQXA(Conserved hypothetical, protein)
59187	gw1.31.175.1	Annexin	1323	-0.617978	-2.63306	0.18131	0.232661	1.59129e-12	8.05129e-12	ENOG410XPUN(S:Function unknown)	ENOG410XPUN(annexin A7)	PF00191.20(Annexin:Annexin)	sp|P20073|ANXA7_HUMAN(Annexin A7 OS=Homo sapiens OX=9606 GN=ANXA7 PE=1 SV=3)
59559	gw1.32.134.1	TBC-domain containing protein	3201	0.58886	-0.323399	2.85e-08	7.06e-08	3.57728e-05	0.000105629	COG5210(S:Function unknown)	COG5210(-)	PF00566.18(RabGAP-TBC:Rab-GTPase-TBC domain)	sp|Q09830|YAD4_SCHPO(TBC domain-containing protein C4G8.04 OS=Schizosaccharomyces pombe (strain 972 / ATCC 24843) OX=284812 GN=SPAC4G8.04 PE=1 SV=1)
67583	e_gw1.1.1125.1	hypothetical protein	1350	0.687158	-0.0796262	2.62e-05	5.34e-05	0.547286	0.637135	ENOG41121TZ(U:Intracellular trafficking, secretion, and vesicular transport)	ENOG41121TZ(Nucleoporin NUP49 NSP49)	PF13634.6(Nucleoporin_FG:Nucleoporin FG repeat region)	sp|G0S4X2|NUP49_CHATD(Nucleoporin NUP49 OS=Chaetomium thermophilum (strain DSM 1495 / CBS 144.50 / IMI 039719) OX=759272 GN=NUP49 PE=1 SV=1)
67636	e_gw1.1.1670.1	vacuolar sorting protein 1	2106	0.201255	-0.458769	0.00225204	0.00383444	5.09418e-18	3.28055e-17	COG0699(S:Function unknown)	COG0699(WD repeat domain 26)	PF01031.20(Dynamin_M:Dynamin central region); PF00350.23(Dynamin_N:Dynamin family); PF02212.18(GED:Dynamin GTPase effector domain); PF01926.23(MMR_HSR1:50S ribosome-binding GTPase)	sp|Q9URZ5|VPS1_SCHPO(Vacuolar protein sorting-associated protein 1 OS=Schizosaccharomyces pombe (strain 972 / ATCC 24843) OX=284812 GN=vps1 PE=3 SV=2)
68023	e_gw1.1.2555.1	RabGAP/TBC	2139	0.622717	0.412533	0.000134277	0.000257482	0.00450012	0.00995556	ENOG410YX8Z(S:Function unknown)	ENOG410YX8Z(TBC1 domain family, member 5)	PF00566.18(RabGAP-TBC:Rab-GTPase-TBC domain)	sp|Q80XQ2|TBCD5_MOUSE(TBC1 domain family member 5 OS=Mus musculus OX=10090 GN=Tbc1d5 PE=1 SV=2)
68327	e_gw1.1.76.1	Peroxin-3 family protein	1518	0.231218	0.558193	0.109855	0.147705	4.92164e-07	1.72846e-06	ENOG41101IY(U:Intracellular trafficking, secretion, and vesicular transport)	ENOG41101IY(peroxisomal biogenesis factor 3)	PF04882.12(Peroxin-3:Peroxin-3)	sp|Q874C0|PEX3_YARLI(Peroxisomal biogenesis factor 3 OS=Yarrowia lipolytica (strain CLIB 122 / E 150) OX=284591 GN=PEX3 PE=3 SV=1)
68336	e_gw1.1.28.1	ADP-ribosylation factor family protein	546	0.812883	0.354269	7.08e-07	1.61e-06	0.00672318	0.0143455	COG1100(S:Function unknown)	COG1100(Conserved hypothetical, protein)	PF00025.21(Arf:ADP-ribosylation factor family); PF08477.13(Roc:Ras of Complex, Roc, domain of DAPkinase); PF09439.10(SRPRB:Signal recognition particle receptor beta subunit); PF00503.20(G-alpha:G-protein alpha subunit); PF00071.22(Ras:Ras family); PF04670.12(Gtr1_RagA:Gtr1/RagA G protein conserved region); PF01926.23(MMR_HSR1:50S ribosome-binding GTPase); PF00009.27(GTP_EFTU:Elongation factor Tu …	sp|P38116|ARL1_YEAST(ADP-ribosylation factor-like protein 1 OS=Saccharomyces cerevisiae (strain ATCC 204508 / S288c) OX=559292 GN=ARL1 PE=1 SV=4)
68368	e_gw1.1.515.1	ESCRT-1 complex%2C Vps28 subunit	753	1.15646	-0.0962744	2.28e-15	8.02e-15	0.302792	0.406387	ENOG4111IQ4(U:Intracellular trafficking, secretion, and vesicular transport)	ENOG4111IQ4(Vacuolar protein sorting-associated protein)	PF03997.12(VPS28:VPS28 protein)	sp|Q02767|VPS28_YEAST(Vacuolar protein sorting-associated protein 28 OS=Saccharomyces cerevisiae (strain ATCC 204508 / S288c) OX=559292 GN=VPS28 PE=1 SV=1)
68740	e_gw1.1.2796.1	SNARE-like protein	441	2.36618	1.18307	0.000680722	0.00122396	0.00538058	0.0117075	ENOG4111X41(U:Intracellular trafficking, secretion, and vesicular transport)	ENOG4111X41(trafficking protein particle complex)	PF04099.12(Sybindin:Sybindin-like family)	sp|Q9UT70|BET5_SCHPO(Transport protein particle subunit bet5 OS=Schizosaccharomyces pombe (strain 972 / ATCC 24843) OX=284812 GN=bet5 PE=3 SV=2)
69668	e_gw1.1.948.1	Ras-domain containing protein	1008	0.473426	0.104043	0.00217858	0.00372467	0.311368	0.416508	ENOG410XQ9X(S:Function unknown)	ENOG410XQ9X(member RAS oncogene family)	PF00071.22(Ras:Ras family); PF08477.13(Roc:Ras of Complex, Roc, domain of DAPkinase); PF00025.21(Arf:ADP-ribosylation factor family); PF01926.23(MMR_HSR1:50S ribosome-binding GTPase); PF04670.12(Gtr1_RagA:Gtr1/RagA G protein conserved region)	sp|O13876|YPT4_SCHPO(GTP-binding protein ypt4 OS=Schizosaccharomyces pombe (strain 972 / ATCC 24843) OX=284812 GN=ypt4 PE=3 SV=1)
69745	e_gw1.1.2060.1	microsomal signal peptidase 18 kDa subunit	519	0.10058	0.636744	0.200118	0.254787	3.51594e-06	1.14848e-05	COG0681(S:Function unknown)	COG0681(-)	PF00717.23(Peptidase_S24:Peptidase S24-like)	sp|C9S8G0|SEC11_VERA1(Signal peptidase complex catalytic subunit SEC11 OS=Verticillium alfalfae (strain VaMs.102 / ATCC MYA-4576 / FGSC 10136) OX=526221 GN=SEC11 PE=3 SV=1)
70670	e_gw1.2.855.1	clathrin adaptor complex small chain	432	0.347019	0.684042	0.264544	0.324443	0.00174665	0.00412756	COG5030(K:Transcription)	COG5030(Suppressor of Ty 3 homolog (S. cerevisiae))	PF01217.20(Clat_adaptor_s:Clathrin adaptor complex small chain)	sp|Q4ICG5|AP2S_GIBZE(AP-2 complex subunit sigma OS=Gibberella zeae (strain PH-1 / ATCC MYA-4620 / FGSC 9075 / NRRL 31084) OX=229533 GN=APS2 PE=3 SV=1)
71231	e_gw1.2.798.1	Adaptor protein complex AP-2%2C alpha subunit	2898	1.10676	0.42078	4.04e-33	2.38e-32	6.98028e-10	3.04552e-09	ENOG410XNQE(U:Intracellular trafficking, secretion, and vesicular transport)	ENOG410XNQE(Adaptor-related protein complex 2, alpha)	PF01602.20(Adaptin_N:Adaptin N terminal region); PF02296.16(Alpha_adaptin_C:Alpha adaptin AP2, C-terminal domain); PF02883.20(Alpha_adaptinC2:Adaptin C-terminal domain)	sp|Q0VCK5|AP2A2_BOVIN(AP-2 complex subunit alpha-2 OS=Bos taurus OX=9913 GN=AP2A2 PE=1 SV=1)
71368	e_gw1.2.877.1	VPS9 domain (Pfam 02204)	2205	1.33114	0.111271	3.45e-16	1.25e-15	0.363012	0.471416	ENOG410YGAZ(S:Function unknown)	ENOG410YGAZ(guanine nucleotide exchange factor)	PF02204.18(VPS9:Vacuolar sorting protein 9 (VPS9) domain)	sp|Q9LT31|VPS9A_ARATH(Vacuolar protein sorting-associated protein 9A OS=Arabidopsis thaliana OX=3702 GN=VPS9A PE=1 SV=1)
71653	e_gw1.2.918.1	putative alpha-N-acetylglucosaminidase	2244	-0.0357121	1.08096	0.867442	0.896045	2.0565e-11	9.89644e-11	ENOG410XNMK(S:Function unknown)	ENOG410XNMK(alpha-N-acetylglucosaminidase)	PF05089.12(NAGLU:Alpha-N-acetylglucosaminidase (NAGLU) tim-barrel domain); PF12972.7(NAGLU_C:Alpha-N-acetylglucosaminidase (NAGLU) C-terminal domain); PF12971.7(NAGLU_N:Alpha-N-acetylglucosaminidase (NAGLU) N-terminal domain)	sp|P54802|ANAG_HUMAN(Alpha-N-acetylglucosaminidase OS=Homo sapiens OX=9606 GN=NAGLU PE=1 SV=2)
72929	e_gw1.3.377.1	Vps36-domain containing protein	1926	0.402744	0.0805271	0.00324312	0.00543561	0.590922	0.678797	ENOG410XR74(U:Intracellular trafficking, secretion, and vesicular transport)	ENOG410XR74(vacuolar protein sorting)	PF04157.16(EAP30:EAP30/Vps36 family); PF16988.5(Vps36-NZF-N:Vacuolar protein sorting 36 NZF-N zinc-finger domain); PF11605.8(Vps36_ESCRT-II:Vacuolar protein sorting protein 36 Vps36); PF00641.18(zf-RanBP:Zn-finger in Ran binding protein and others)	sp|A5PK00|VPS36_BOVIN(Vacuolar protein-sorting-associated protein 36 OS=Bos taurus OX=9913 GN=VPS36 PE=2 SV=1)
72977	e_gw1.3.885.1	Sec1-like protein	2046	1.38462	0.22455	6.03e-22	2.65e-21	0.0216964	0.0417506	COG5158(S:Function unknown)	COG5158(G-patch domain protein)	PF00995.23(Sec1:Sec1 family)	sp|O94590|SEC1_SCHPO(Protein transport protein sec1 OS=Schizosaccharomyces pombe (strain 972 / ATCC 24843) OX=284812 GN=sec1 PE=3 SV=1)
73212	e_gw1.3.941.1	VPS9 domain (Pfam 02204)	1911	-0.0289514	-0.116284	0.763926	0.801836	0.191742	0.27886	ENOG410YGAZ(S:Function unknown)	ENOG410YGAZ(synthase)	PF02204.18(VPS9:Vacuolar sorting protein 9 (VPS9) domain); PF18151.1(DUF5601:Domain of unknown function (DUF5601)); PF02845.16(CUE:CUE domain)	sp|O74396|VPS91_SCHPO(Vacuolar protein sorting-associated protein 9a OS=Schizosaccharomyces pombe (strain 972 / ATCC 24843) OX=284812 GN=vps901 PE=1 SV=3)
73560	e_gw1.3.388.1	transferase hexapeptide domain-containing protein	582	2.37665	0.519543	2.32e-12	7.19e-12	0.0336556	0.0616731	ENOG41100G7(S:Function unknown)	ENOG41100G7(transferase hexapeptide domain protein)	PF00132.24(Hexapep:Bacterial transferase hexapeptide (six repeats)); PF14602.6(Hexapep_2:Hexapeptide repeat of succinyl-transferase); PF07959.12(Fucokinase:L-fucokinase)
73575	e_gw1.3.192.1	endosomal P24B protein	615	0.262953	0.767842	0.000111377	0.000215292	5.15648e-15	2.96018e-14	ENOG410XQCK(U:Intracellular trafficking, secretion, and vesicular transport)	ENOG410XQCK(transmembrane emp24 domain trafficking protein 2)	PF01105.24(EMP24_GP25L:emp24/gp25L/p24 family/GOLD)	sp|P32803|EMP24_YEAST(Endosomal protein P24B OS=Saccharomyces cerevisiae (strain ATCC 204508 / S288c) OX=559292 GN=EMP24 PE=1 SV=1)
73870	e_gw1.3.656.1	vesicle transport V-SNARE protein	687	-0.112397	0.419711	0.436702	0.508816	0.00065683	0.00165621	ENOG410YI1X(U:Intracellular trafficking, secretion, and vesicular transport)	ENOG410YI1X(Involved in transport from the ER to the Golgi apparatus as well as in intra-Golgi transport. It belongs to a super-family of proteins called t-SNAREs or soluble NSF (N-ethylmaleimide- sensitive factor) attachment protein receptor (By similarity))	PF12352.8(V-SNARE_C:Snare region anchored in the vesicle membrane C-terminus)	sp|P38736|GOSR1_YEAST(Golgi SNAP receptor complex member 1 OS=Saccharomyces cerevisiae (strain ATCC 204508 / S288c) OX=559292 GN=GOS1 PE=1 SV=1)
74391	e_gw1.4.235.1	PRA1 family protein	531	0.181503	0.16285	0.0316736	0.0465779	0.0604792	0.103375	COG5130(U:Intracellular trafficking, secretion, and vesicular transport)	COG5130(Prenylated RAB acceptor)	PF03208.19(PRA1:PRA1 family protein)	sp|P53633|PRA1_YEAST(Prenylated Rab acceptor 1 OS=Saccharomyces cerevisiae (strain ATCC 204508 / S288c) OX=559292 GN=YIP3 PE=1 SV=2)
75257	e_gw1.5.1101.1	Phox-like protein	420	0.0164234	-0.55298	0.933854	0.95523	5.21282e-08	1.98762e-07	COG5391(U:Intracellular trafficking, secretion, and vesicular transport)	COG5391(sorting nexin)	PF00787.24(PX:PX domain)	sp|Q4I1H6|SNX3_GIBZE(Sorting nexin-3 OS=Gibberella zeae (strain PH-1 / ATCC MYA-4620 / FGSC 9075 / NRRL 31084) OX=229533 GN=SNX3 PE=3 SV=2)
75875	e_gw1.5.777.1	Ras-domain containing protein	612	0.510594	-0.0106328	4.7e-06	1.02e-05	0.901172	0.93607	ENOG410XPUI(S:Function unknown)	ENOG410XPUI(member RAS oncogene family)	PF00071.22(Ras:Ras family); PF08477.13(Roc:Ras of Complex, Roc, domain of DAPkinase); PF00025.21(Arf:ADP-ribosylation factor family); PF00009.27(GTP_EFTU:Elongation factor Tu GTP binding domain); PF04670.12(Gtr1_RagA:Gtr1/RagA G protein conserved region)	sp|P17609|YPT2_SCHPO(GTP-binding protein ypt2 OS=Schizosaccharomyces pombe (strain 972 / ATCC 24843) OX=284812 GN=ypt2 PE=3 SV=1)
76204	e_gw1.5.56.1	Coatomer%2C gamma subunit	2757	0.691797	0.308523	1.29e-58	1.12e-57	1.76595e-12	8.93013e-12	COG5240(U:Intracellular trafficking, secretion, and vesicular transport)	COG5240(The coatomer is a cytosolic protein complex that binds to dilysine motifs and reversibly associates with Golgi non- clathrin-coated vesicles, which further mediate biosynthetic protein transport from the ER, via the Golgi up to the trans Golgi network. Coatomer complex is required for budding from Golgi membranes, and is essential for the retrograde Golgi-to-ER transport of dilysine-tagge…	PF01602.20(Adaptin_N:Adaptin N terminal region); PF08752.10(COP-gamma_platf:Coatomer gamma subunit appendage platform subdomain); PF16381.5(Coatomer_g_Cpla:Coatomer subunit gamma-1 C-terminal appendage platform); PF13646.6(HEAT_2:HEAT repeats)	sp|P87140|COPG_SCHPO(Probable coatomer subunit gamma OS=Schizosaccharomyces pombe (strain 972 / ATCC 24843) OX=284812 GN=sec21 PE=1 SV=1)
76302	e_gw1.6.370.1	mitochondrial import inner membrane translocase subunit tim-22	531	0.341577	0.103269	0.0505092	0.071787	0.601284	0.685172	COG5596(O:Posttranslational modification, protein turnover, chaperones)	COG5596(mitochondrial import inner membrane translocase, subunit)	PF02466.19(Tim17:Tim17/Tim22/Tim23/Pmp24 family)	sp|Q9C1E8|TIM22_NEUCR(Mitochondrial import inner membrane translocase subunit tim22 OS=Neurospora crassa (strain ATCC 24698 / 74-OR23-1A / CBS 708.71 / DSM 1257 / FGSC 987) OX=367110 GN=tim22 PE=3 SV=2)
76363	e_gw1.6.1125.1	putative SPP30 protein	642	0.681987	0.0791669	0.000335312	0.00062204	0.586838	0.675196	COG5128(U:Intracellular trafficking, secretion, and vesicular transport)	COG5128(trafficking protein particle complex)	PF04051.16(TRAPP:Transport protein particle (TRAPP) component)	sp|Q9P7N9|TRS31_SCHPO(Transport protein particle subunit trs31 OS=Schizosaccharomyces pombe (strain 972 / ATCC 24843) OX=284812 GN=trs31 PE=3 SV=1)
77154	e_gw1.6.209.1	Uncharacterised conserved protein UCP028035	2826	0	1.70044	0.979924	0.988381	0.354056	0.463297	ENOG410Y2K5(S:Function unknown)	ENOG410Y2K5(-)
77206	e_gw1.6.803.1	hypothetical protein	750	0.793952	-0.073516	1.04e-05	2.19e-05	0.606642	0.690003	ENOG410ZZA3(U:Intracellular trafficking, secretion, and vesicular transport)	ENOG410ZZA3(syntaxin)	PF09177.11(Syntaxin-6_N:Syntaxin 6, N-terminal); PF05739.19(SNARE:SNARE domain); PF09753.9(Use1:Membrane fusion protein Use1)	sp|Q9HGN3|TLG1_SCHPO(t-SNARE affecting a late Golgi compartment protein 1 OS=Schizosaccharomyces pombe (strain 972 / ATCC 24843) OX=284812 GN=tlg1 PE=3 SV=1)
77316	e_gw1.6.453.1	hypothetical protein	1539	1.87034	0.279837	2.28e-83	2.55e-82	0.00798076	0.0167659	COG0706(U:Intracellular trafficking, secretion, and vesicular transport)	COG0706(Required for the insertion and or proper folding and or complex formation of integral membrane proteins into the membrane. Involved in integration of membrane proteins that insert both dependently and independently of the Sec translocase complex, as well as at least some lipoproteins)	PF02096.20(60KD_IMP:60Kd inner membrane protein)	sp|O13375|OXA1_KAZSE(Mitochondrial inner membrane protein OXA1 OS=Kazachstania servazzii OX=27293 GN=OXA1 PE=3 SV=1)
77327	e_gw1.6.134.1	ARM repeat-containing protein	1680	0.599658	0.0386079	1.45e-13	4.73e-13	0.584116	0.672817	ENOG410XRTN(S:Function unknown)	ENOG410XRTN(U-box domain-containing protein)	PF00514.23(Arm:Armadillo/beta-catenin-like repeat); PF13513.6(HEAT_EZ:HEAT-like repeat); PF13646.6(HEAT_2:HEAT repeats); PF01602.20(Adaptin_N:Adaptin N terminal region); PF04826.13(Arm_2:Armadillo-like); PF03224.14(V-ATPase_H_N:V-ATPase subunit H); PF05804.12(KAP:Kinesin-associated protein (KAP))	sp|Q4I1B1|VAC8_GIBZE(Vacuolar protein 8 OS=Gibberella zeae (strain PH-1 / ATCC MYA-4620 / FGSC 9075 / NRRL 31084) OX=229533 GN=VAC8 PE=3 SV=4)
77403	e_gw1.6.204.1	signal recognition particle 54 kDa protein	1563	0.221516	0.0452922	0.0087588	0.0139297	0.59996	0.684422	COG0541(U:Intracellular trafficking, secretion, and vesicular transport)	COG0541(Involved in targeting and insertion of nascent membrane proteins into the cytoplasmic membrane. Binds to the hydrophobic signal sequence of the ribosome-nascent chain (RNC) as it emerges from the ribosomes. The SRP-RNC complex is then targeted to the cytoplasmic membrane where it interacts with the SRP receptor FtsY)	PF00448.22(SRP54:SRP54-type protein, GTPase domain); PF02978.19(SRP_SPB:Signal peptide binding domain); PF02881.19(SRP54_N:SRP54-type protein, helical bundle domain); PF02492.19(cobW:CobW/HypB/UreG, nucleotide-binding domain); PF13671.6(AAA_33:AAA domain); PF13207.6(AAA_17:AAA domain); PF13191.6(AAA_16:AAA ATPase domain); PF03308.16(MeaB:Methylmalonyl Co-A mutase-associated GTPase MeaB); PF02223.…	sp|Q00179|SRP54_ASPNG(Signal recognition particle 54 kDa protein homolog OS=Aspergillus niger OX=5061 GN=srpA PE=3 SV=1)
77920	e_gw1.7.163.1	hypothetical protein	621	-0.442638	-0.356951	0.0541706	0.0767277	0.163702	0.243162	ENOG4111H59(S:Function unknown)	ENOG4111H59(SYS1 Golgi-localized integral membrane protein homolog (S. cerevisiae))	PF09801.9(SYS1:Integral membrane protein S linking to the trans Golgi network)	sp|P41544|SYS1_YEAST(Protein SYS1 OS=Saccharomyces cerevisiae (strain ATCC 204508 / S288c) OX=559292 GN=SYS1 PE=1 SV=1)
78012	e_gw1.7.422.1	Signal recognition particle%2C SRP9/SRP14 subunit	396	-0.358572	-0.0656188	0.0260756	0.0388217	0.682564	0.754924	ENOG410XU6R(U:Intracellular trafficking, secretion, and vesicular transport)	ENOG410XU6R(signal recognition particle 14kD protein)	PF02290.15(SRP14:Signal recognition particle 14kD protein)
78189	e_gw1.7.306.1	hypothetical protein	3756	-0.0325259	0.719264	0.730948	0.771754	4.0668e-18	2.63545e-17	COG5307(S:Function unknown)	COG5307(and Sec7 domain)	PF01369.20(Sec7:Sec7 domain); PF15410.6(PH_9:Pleckstrin homology domain)	sp|O13690|YDYB_SCHPO(PH and SEC7 domain-containing protein C11E3.11c OS=Schizosaccharomyces pombe (strain 972 / ATCC 24843) OX=284812 GN=SPAC11E3.11c PE=4 SV=1)
78721	e_gw1.8.612.1	Ras-domain containing protein	681	0.976312	-0.904149	7.22e-07	1.64e-06	2.0877e-08	8.20016e-08	COG1100(S:Function unknown)	COG1100(WD40)	PF00071.22(Ras:Ras family); PF08477.13(Roc:Ras of Complex, Roc, domain of DAPkinase); PF00025.21(Arf:ADP-ribosylation factor family); PF04670.12(Gtr1_RagA:Gtr1/RagA G protein conserved region); PF00009.27(GTP_EFTU:Elongation factor Tu GTP binding domain); PF01926.23(MMR_HSR1:50S ribosome-binding GTPase)	sp|Q01971|RAB2A_RABIT(Ras-related protein Rab-2A OS=Oryctolagus cuniculus OX=9986 GN=RAB2A PE=2 SV=1)
79544	e_gw1.9.201.1	MFS general substrate transporter	1455	-0.395929	-0.17897	0.589886	0.645856	0.84091	0.884293	ENOG410XW69(U:Intracellular trafficking, secretion, and vesicular transport)	ENOG410XW69(solute carrier family 18 (Vesicular)	PF07690.16(MFS_1:Major Facilitator Superfamily)	sp|O74852|YQ92_SCHPO(Uncharacterized MFS-type transporter C18.02 OS=Schizosaccharomyces pombe (strain 972 / ATCC 24843) OX=284812 GN=SPCC18.02 PE=3 SV=1)
79640	e_gw1.9.80.1	hypothetical protein	3567	-1.00828	-0.648049	2.66e-68	2.56e-67	2.98466e-39	3.23041e-38	ENOG4111NCK(U:Intracellular trafficking, secretion, and vesicular transport)	ENOG4111NCK(RAN binding protein)	PF00638.18(Ran_BP1:RanBP1 domain); PF13634.6(Nucleoporin_FG:Nucleoporin FG repeat region)	sp|G0SDP9|NU152_CHATD(Nucleoporin NUP152 OS=Chaetomium thermophilum (strain DSM 1495 / CBS 144.50 / IMI 039719) OX=759272 GN=NUP152 PE=3 SV=1)
79870	e_gw1.9.298.1	dynamin-A	2409	0.435594	-0.15319	7.7e-06	1.64e-05	0.0724778	0.120805	COG0699(S:Function unknown)	COG0699(-)	PF01031.20(Dynamin_M:Dynamin central region); PF00350.23(Dynamin_N:Dynamin family); PF02212.18(GED:Dynamin GTPase effector domain); PF01926.23(MMR_HSR1:50S ribosome-binding GTPase)	sp|P54861|DNM1_YEAST(Dynamin-related protein DNM1 OS=Saccharomyces cerevisiae (strain ATCC 204508 / S288c) OX=559292 GN=DNM1 PE=1 SV=1)
79975	e_gw1.9.352.1	Endosulfine-domain containing protein	486	0.703665	0.330572	2.71e-08	6.72e-08	0.00027936	0.000747167	ENOG4112586(S:Function unknown)	ENOG4112586(CAMP-regulated phosphoprotein)	PF04667.17(Endosulfine:cAMP-regulated phosphoprotein/endosulfine conserved region)	sp|P79058|IGO1_SCHPO(mRNA stability protein mug134 OS=Schizosaccharomyces pombe (strain 972 / ATCC 24843) OX=284812 GN=mug134 PE=2 SV=4)
80583	e_gw1.10.717.1	Phox-like protein	1095	0.0142805	0.224978	0.942184	0.962671	0.0843476	0.138004	ENOG410XSB2(U:Intracellular trafficking, secretion, and vesicular transport)	ENOG410XSB2(SNARE complex subunit Vam7)	PF00787.24(PX:PX domain)	sp|O74509|VAM7_SCHPO(Vacuolar morphogenesis protein 7 homolog OS=Schizosaccharomyces pombe (strain 972 / ATCC 24843) OX=284812 GN=SPCC594.06c PE=3 SV=1)
80626	e_gw1.10.622.1	hypothetical protein	3258	1.33689	-0.509955	1.5e-109	2.05e-108	2.2659e-38	2.41296e-37	COG5101(S:Function unknown)	COG5101(conserved hypothetical protein)	PF08767.11(CRM1_C:CRM1 C terminal); PF08389.12(Xpo1:Exportin 1-like protein); PF18784.1(CRM1_repeat_2:CRM1 / Exportin repeat 2); PF18787.1(CRM1_repeat_3:CRM1 / Exportin repeat 3); PF18777.1(CRM1_repeat:Chromosome region maintenance or exportin repeat); PF03810.19(IBN_N:Importin-beta N-terminal domain)	sp|P14068|XPO1_SCHPO(Exportin-1 OS=Schizosaccharomyces pombe (strain 972 / ATCC 24843) OX=284812 GN=xpo1 PE=1 SV=3)
80647	e_gw1.10.800.1	AP-3 complex subunit sigma	567	0.0835243	-0.475522	0.428468	0.500373	1.32835e-06	4.48796e-06	COG5030(S:Function unknown)	COG5030(-)	PF01217.20(Clat_adaptor_s:Clathrin adaptor complex small chain)	sp|Q09905|AP3S_SCHPO(AP-3 complex subunit sigma OS=Schizosaccharomyces pombe (strain 972 / ATCC 24843) OX=284812 GN=aps3 PE=3 SV=1)
81178	e_gw1.10.115.1	ARF/SAR	546	1.17224	0.306083	9.12e-07	2.06e-06	0.157432	0.235511	ENOG410XRG9(S:Function unknown)	ENOG410XRG9(ADP-ribosylation factor-like)	PF00025.21(Arf:ADP-ribosylation factor family); PF00503.20(G-alpha:G-protein alpha subunit); PF08477.13(Roc:Ras of Complex, Roc, domain of DAPkinase); PF00071.22(Ras:Ras family); PF04670.12(Gtr1_RagA:Gtr1/RagA G protein conserved region); PF01926.23(MMR_HSR1:50S ribosome-binding GTPase); PF09439.10(SRPRB:Signal recognition particle receptor beta subunit); PF00009.27(GTP_EFTU:Elongation factor Tu …	sp|Q54UF1|ARL2_DICDI(ADP-ribosylation factor-like protein 2 OS=Dictyostelium discoideum OX=44689 GN=arl2 PE=3 SV=1)
81981	e_gw1.11.96.1	Polyubiquitin-tagged protein recognition complex%2C Npl4 component	1992	1.16578	-0.293731	4.62e-66	4.36e-65	5.23814e-08	1.99563e-07	COG5100(Y:Nuclear structure)	COG5100(Nuclear protein localization)	PF05021.15(NPL4:NPL4 family); PF05020.15(zf-NPL4:NPL4 family, putative zinc binding region)	sp|Q7SH49|NPL4_NEUCR(Nuclear protein localization protein 4 OS=Neurospora crassa (strain ATCC 24698 / 74-OR23-1A / CBS 708.71 / DSM 1257 / FGSC 987) OX=367110 GN=npl4 PE=3 SV=2)
82427	e_gw1.12.546.1	hypothetical protein	1281	-0.0744624	0.748681	0.604796	0.660436	4.05188e-14	2.23857e-13	ENOG41100SS(U:Intracellular trafficking, secretion, and vesicular transport)	ENOG41100SS(Metaxin 3)	PF10568.9(Tom37:Outer mitochondrial membrane transport complex protein); PF17171.4(GST_C_6:Glutathione S-transferase, C-terminal domain); PF17172.4(GST_N_4:Glutathione S-transferase N-terminal domain)	sp|Q2TBS1|MTX1_BOVIN(Metaxin-1 OS=Bos taurus OX=9913 GN=MTX1 PE=2 SV=1)
82444	e_gw1.12.99.1	UEV-domain containing protein	1632	1.5595	0.660573	2.38e-12	7.37e-12	4.49082e-05	0.000131388	ENOG410XT2Q(U:Intracellular trafficking, secretion, and vesicular transport)	ENOG410XT2Q(Tumor susceptibility gene 101)	PF05743.13(UEV:UEV domain); PF09454.10(Vps23_core:Vps23 core domain)	sp|Q61187|TS101_MOUSE(Tumor susceptibility gene 101 protein OS=Mus musculus OX=10090 GN=Tsg101 PE=1 SV=2)
82765	e_gw1.13.459.1	hypothetical protein	1011	0.284839	0.0376678	0.0800558	0.109792	0.787884	0.841829	ENOG410Y26G(P:Inorganic ion transport and metabolism)	ENOG410Y26G(H( )-stimulated, divalent metal cation uptake system (By similarity))	PF00790.19(VHS:VHS domain); PF03127.14(GAT:GAT domain)	sp|P87308|LSB5_SCHPO(Protein lsb5 OS=Schizosaccharomyces pombe (strain 972 / ATCC 24843) OX=284812 GN=lsb5 PE=3 SV=1)
82863	e_gw1.13.528.1	hypothetical protein	5493	1.16213	0.0515136	1.02e-33	6.08e-33	0.50964	0.607994	ENOG410XRX6(S:Function unknown)	ENOG410XRX6(vacuolar protein sorting 8 homolog (S. cerevisiae))	PF12816.7(Vps8:Golgi CORVET complex core vacuolar protein 8); PF08510.12(PIG-P:PIG-P)	sp|P39702|VPS8_YEAST(Vacuolar protein sorting-associated protein 8 OS=Saccharomyces cerevisiae (strain ATCC 204508 / S288c) OX=559292 GN=VPS8 PE=1 SV=2)
83428	e_gw1.14.498.1	protein translocase SEC6	213	0.217048	1.02423	0.127935	0.169785	4.16486e-08	1.59857e-07	ENOG4111WJ7(U:Intracellular trafficking, secretion, and vesicular transport)	ENOG4111WJ7(protein transport protein sec61)	PF00584.20(SecE:SecE/Sec61-gamma subunits of protein translocation complex)	sp|Q9C2D4|SC61G_NEUCR(Probable protein transport protein Sec61 subunit gamma OS=Neurospora crassa (strain ATCC 24698 / 74-OR23-1A / CBS 708.71 / DSM 1257 / FGSC 987) OX=367110 GN=9G6.310 PE=3 SV=2)
83525	e_gw1.14.117.1	putative longevity-assurance protein	1377	0.453099	0.617588	1.33e-06	2.97e-06	6.51112e-13	3.38125e-12	COG5058(H:Coenzyme transport and metabolism)	COG5058(nicotinate-nucleotide diphosphorylase (carboxylating) activity)	PF03798.16(TRAM_LAG1_CLN8:TLC domain); PF08390.11(TRAM1:TRAM1-like protein)	sp|Q8J2Q2|FUM18_GIBM7(Sphingosine N-acyltransferase-like protein FUM18 OS=Gibberella moniliformis (strain M3125 / FGSC 7600) OX=334819 GN=FUM18 PE=3 SV=1)
83538	e_gw1.14.321.1	hypothetical protein	4521	1.04584	-0.0614005	6.45e-23	2.91e-22	0.455014	0.563908	COG0220(S:Function unknown); ENOG410XQM8(S:Function unknown)	COG0220(Catalyzes the formation of N(7)-methylguanine at position 46 (m7G46) in tRNA (By similarity)); ENOG410XQM8(sorting nexin)	PF02194.15(PXA:PXA domain); PF02390.17(Methyltransf_4:Putative methyltransferase); PF08628.12(Nexin_C:Sorting nexin C terminal); PF00787.24(PX:PX domain); PF00615.19(RGS:Regulator of G protein signaling domain)	sp|B2AR91|TRMB_PODAN(tRNA (guanine-N(7)-)-methyltransferase OS=Podospora anserina (strain S / ATCC MYA-4624 / DSM 980 / FGSC 10383) OX=515849 GN=TRM8 PE=3 SV=1)
83839	e_gw1.14.532.1	Sybindin-like protein	537	0.552651	0.395513	0.0034542	0.00577135	0.0492328	0.0865831	COG5122(U:Intracellular trafficking, secretion, and vesicular transport)	COG5122(trafficking protein particle complex)	PF04099.12(Sybindin:Sybindin-like family); PF04628.13(Sedlin_N:Sedlin, N-terminal conserved region)	sp|O43041|TRS23_SCHPO(Transport protein particle subunit trs23 OS=Schizosaccharomyces pombe (strain 972 / ATCC 24843) OX=284812 GN=trs23 PE=3 SV=1)
84393	e_gw1.15.399.1	Sedlin	492	0.878896	-0.0956434	2.38e-08	5.93e-08	0.452042	0.560901	COG5603(U:Intracellular trafficking, secretion, and vesicular transport)	COG5603(trafficking protein particle complex)	PF04628.13(Sedlin_N:Sedlin, N-terminal conserved region); PF04099.12(Sybindin:Sybindin-like family)	sp|Q3T0F2|TPPC2_BOVIN(Trafficking protein particle complex subunit 2 OS=Bos taurus OX=9913 GN=TRAPPC2 PE=2 SV=1)
84521	e_gw1.15.604.1	hypothetical protein	2898	0.603298	-0.227992	7.97e-14	2.63e-13	0.00194549	0.00456828	ENOG410XRSD(U:Intracellular trafficking, secretion, and vesicular transport)	ENOG410XRSD(Vacuolar Protein)	PF05131.14(Pep3_Vps18:Pep3/Vps18/deep orange family); PF00637.20(Clathrin:Region in Clathrin and VPS); PF09943.9(DUF2175:Uncharacterized protein conserved in archaea (DUF2175)); PF13923.6(zf-C3HC4_2:Zinc finger, C3HC4 type (RING finger)); PF17120.5(Zn_ribbon_17:Zinc-ribbon, C4HC2 type)	sp|Q9P253|VPS18_HUMAN(Vacuolar protein sorting-associated protein 18 homolog OS=Homo sapiens OX=9606 GN=VPS18 PE=1 SV=2)
84673	e_gw1.16.544.1	hypothetical protein	3624	1.13731	0.00967894	1.4e-22	6.26e-22	0.931688	0.958728	COG5079(D:Cell cycle control, cell division, chromosome partitioning); COG5079(U:Intracellular trafficking, secretion, and vesicular transport)	COG5079(minichromosome maintenance complex component 3 associated protein); COG5079(minichromosome maintenance complex component 3 associated protein)	PF03399.16(SAC3_GANP:SAC3/GANP family)	sp|O74889|SAC31_SCHPO(SAC3 family protein 1 OS=Schizosaccharomyces pombe (strain 972 / ATCC 24843) OX=284812 GN=SPCC576.05 PE=1 SV=1)
85110	e_gw1.16.437.1	hypothetical protein	4152	0.879768	-0.0563541	1.72e-21	7.45e-21	0.40112	0.510446	ENOG410XNUX(U:Intracellular trafficking, secretion, and vesicular transport)	ENOG410XNUX(Nuclear pore complex)	PF03177.14(Nucleoporin_C:Non-repetitive/WGA-negative nucleoporin C-terminal); PF08801.11(Nucleoporin_N:Nup133 N terminal like)	sp|G0S9A7|NU133_CHATD(Nucleoporin NUP133 OS=Chaetomium thermophilum (strain DSM 1495 / CBS 144.50 / IMI 039719) OX=759272 GN=NUP133 PE=3 SV=1)
85689	e_gw1.17.479.1	Snf7	642	0.0618738	0.0104783	0.732934	0.773671	0.94773	0.970702	ENOG410XPDA(U:Intracellular trafficking, secretion, and vesicular transport)	ENOG410XPDA(Charged multivesicular body protein)	PF03357.21(Snf7:Snf7); PF05531.12(NPV_P10:Nucleopolyhedrovirus P10 protein)	sp|Q54JK4|CHMP5_DICDI(Charged multivesicular body protein 5 OS=Dictyostelium discoideum OX=44689 GN=chmp5 PE=3 SV=1)
86366	e_gw1.19.176.1	SPC25-domain containing protein	660	1.17472	0.412813	6.14e-27	3.11e-26	0.012241	0.0247764	ENOG41125HI(U:Intracellular trafficking, secretion, and vesicular transport)	ENOG41125HI(signal peptidase complex)	PF06703.11(SPC25:Microsomal signal peptidase 25 kDa subunit (SPC25))
86957	e_gw1.20.292.1	nuclear export protein Noc3	1992	0.432111	-0.6054	0.144418	0.188396	0.0366762	0.0664061	COG5117(J:Translation, ribosomal structure and biogenesis); COG5117(U:Intracellular trafficking, secretion, and vesicular transport)	COG5117(nucleolar complex associated 3 homolog (S. cerevisiae)); COG5117(nucleolar complex associated 3 homolog (S. cerevisiae))	PF07540.11(NOC3p:Nucleolar complex-associated protein); PF03914.17(CBF:CBF/Mak21 family)	sp|O94288|NOC3_SCHPO(Nucleolar complex-associated protein 3 OS=Schizosaccharomyces pombe (strain 972 / ATCC 24843) OX=284812 GN=noc3 PE=1 SV=1)
87029	e_gw1.20.116.1	Serine/threonine-protein kinase	2784	1.85798	-0.132237	2.16e-60	1.91e-59	0.00613112	0.0131978	ENOG410XR01(T:Signal transduction mechanisms)	ENOG410XR01(Unc51-like kinase)	PF12063.8(DUF3543:Domain of unknown function (DUF3543)); PF00069.25(Pkinase:Protein kinase domain); PF07714.17(Pkinase_Tyr:Protein tyrosine kinase)	sp|J4W0G2|ATG1_BEAB2(Serine/threonine-protein kinase ATG1 OS=Beauveria bassiana (strain ARSEF 2860) OX=655819 GN=ATG1 PE=2 SV=1)
87230	e_gw1.20.464.1	P-loop containing nucleoside triphosphate hydrolase protein	642	1.50335	0.304727	2.2e-05	4.52e-05	0.26463	0.362208	ENOG410ZMDV(S:Function unknown)	ENOG410ZMDV(ADP-ribosylation factor related protein 1)	PF00025.21(Arf:ADP-ribosylation factor family); PF00503.20(G-alpha:G-protein alpha subunit); PF00071.22(Ras:Ras family); PF04670.12(Gtr1_RagA:Gtr1/RagA G protein conserved region); PF08477.13(Roc:Ras of Complex, Roc, domain of DAPkinase); PF09439.10(SRPRB:Signal recognition particle receptor beta subunit); PF01926.23(MMR_HSR1:50S ribosome-binding GTPase); PF00009.27(GTP_EFTU:Elongation factor Tu …	sp|Q02804|ARL3_YEAST(ADP-ribosylation factor-like protein 3 OS=Saccharomyces cerevisiae (strain ATCC 204508 / S288c) OX=559292 GN=ARL3 PE=1 SV=1)
87373	e_gw1.21.137.1	hypothetical protein	798	1.16589	0.866785	2.19e-12	6.77e-12	3.91054e-13	2.06083e-12	ENOG41125SV(U:Intracellular trafficking, secretion, and vesicular transport)	ENOG41125SV(SNARE complex subunit)	PF05739.19(SNARE:SNARE domain)
87469	e_gw1.21.356.1	V-SNARE-domain containing protein	2205	0.0256874	-0.176814	0.594322	0.650011	1.69279e-05	5.17853e-05	ENOG4111J90(U:Intracellular trafficking, secretion, and vesicular transport); ENOG41122RA(S:Function unknown)	ENOG4111J90(vesicle transport through interaction with t-SNAREs); ENOG41122RA(LSM14A, SCD6 homolog A (S. cerevisiae))	PF12701.7(LSM14:Scd6-like Sm domain); PF05008.15(V-SNARE:Vesicle transport v-SNARE protein N-terminus); PF09532.10(FDF:FDF domain); PF12352.8(V-SNARE_C:Snare region anchored in the vesicle membrane C-terminus)	sp|P78768|VTI1_SCHPO(Vesicle transport v-SNARE protein vti1 OS=Schizosaccharomyces pombe (strain 972 / ATCC 24843) OX=284812 GN=vti1 PE=2 SV=2)
87587	e_gw1.21.30.1	SNARE domain-containing protein	795	-0.388466	-0.168468	0.0002149	0.000405512	0.0805246	0.132546	COG5325(U:Intracellular trafficking, secretion, and vesicular transport)	COG5325(SYNtaxin)	PF14523.6(Syntaxin_2:Syntaxin-like protein); PF05739.19(SNARE:SNARE domain); PF00804.25(Syntaxin:Syntaxin)	sp|P32854|PEP12_YEAST(Syntaxin PEP12 OS=Saccharomyces cerevisiae (strain ATCC 204508 / S288c) OX=559292 GN=PEP12 PE=1 SV=2)
87624	e_gw1.21.318.1	mitochondrial export translocase Oxa2	1083	1.39495	0.143527	5.9e-08	1.44e-07	0.584234	0.672869	ENOG410YT1G(S:Function unknown)	ENOG410YT1G(60Kd inner membrane protein)		sp|Q5R7D0|COX18_PONAB(Cytochrome c oxidase assembly protein COX18, mitochondrial OS=Pongo abelii OX=9601 GN=COX18 PE=2 SV=1)
87774	e_gw1.22.158.1	hypothetical protein	1179	-0.223492	-0.805232	0.0238482	0.035845	1.68826e-07	6.20213e-07	ENOG4112A2Y(S:Function unknown)	ENOG4112A2Y(-)		sp|Q96K21|ANCHR_HUMAN(Abscission/NoCut checkpoint regulator OS=Homo sapiens OX=9606 GN=ZFYVE19 PE=1 SV=3)
87908	e_gw1.22.430.1	ANTH-domain containing protein	1833	1.05215	0.251242	1.34e-25	6.5e-25	0.00232298	0.00538498	ENOG410XQ90(U:Intracellular trafficking, secretion, and vesicular transport)	ENOG410XQ90(Clathrin assembly protein)	PF07651.16(ANTH:ANTH domain); PF01417.20(ENTH:ENTH domain)	sp|O60167|YHC3_SCHPO(ENTH domain-containing protein C19F8.03c OS=Schizosaccharomyces pombe (strain 972 / ATCC 24843) OX=284812 GN=SPBC19F8.03c PE=1 SV=1)
88031	e_gw1.22.173.1	hypothetical protein	1026	-1.0471	-0.141853	2.55e-06	5.61e-06	0.416368	0.525514	ENOG4111MR5(S:Function unknown)	ENOG4111MR5(Mitochondrial outer membrane protein)	PF17172.4(GST_N_4:Glutathione S-transferase N-terminal domain); PF17171.4(GST_C_6:Glutathione S-transferase, C-terminal domain); PF10568.9(Tom37:Outer mitochondrial membrane transport complex protein)
88258	e_gw1.23.206.1	nucleoporin Nup157/170	4239	0.418226	0.107306	3.97e-07	9.2e-07	0.151372	0.22755	COG5308(U:Intracellular trafficking, secretion, and vesicular transport)	COG5308(nuclear pore complex protein)	PF08801.11(Nucleoporin_N:Nup133 N terminal like); PF03177.14(Nucleoporin_C:Non-repetitive/WGA-negative nucleoporin C-terminal)	sp|G0S7B6|NU170_CHATD(Nucleoporin NUP170 OS=Chaetomium thermophilum (strain DSM 1495 / CBS 144.50 / IMI 039719) OX=759272 GN=NUP170 PE=1 SV=1)
88299	e_gw1.23.123.1	hypothetical protein	2193	0.982886	0.763507	0.000377574	0.000697036	0.000531892	0.00135783	COG0699(S:Function unknown)	COG0699(chromosome 9 open reading frame 114)	PF00350.23(Dynamin_N:Dynamin family); PF01031.20(Dynamin_M:Dynamin central region); PF02212.18(GED:Dynamin GTPase effector domain); PF01926.23(MMR_HSR1:50S ribosome-binding GTPase)	sp|Q2KTC2|MX_DICLA(Interferon-induced GTP-binding protein Mx OS=Dicentrarchus labrax OX=13489 GN=mx PE=2 SV=2)
89116	e_gw1.25.184.1	hypothetical protein	900	-2.29972	-0.263429	1.26e-20	5.3e-20	0.383012	0.492619	ENOG4111VID(S:Function unknown)	ENOG4111VID(DNA-binding protein)	PF11338.8(DUF3140:Protein of unknown function (DUF3140)); PF11160.8(Hva1_TUDOR:Hypervirulence associated proteins TUDOR domain)
90481	e_gw1.29.213.1	protein translocation protein	1101	0.438965	0.65087	1.12e-13	3.68e-13	3.2411e-14	1.79815e-13	COG5232(U:Intracellular trafficking, secretion, and vesicular transport)	COG5232(translocation protein)	PF03839.16(Sec62:Translocation protein Sec62)	sp|Q99161|SEC62_YARLI(Translocation protein SEC62 OS=Yarrowia lipolytica (strain CLIB 122 / E 150) OX=284591 GN=SEC62 PE=3 SV=2)
90580	e_gw1.29.184.1	expressed protein	771	0.300629	-0.662879	2.2e-08	5.51e-08	1.63171e-53	2.20758e-52	ENOG4111MRD(S:Function unknown)	ENOG4111MRD(reticulon-like protein)	PF02453.17(Reticulon:Reticulon)
91218	e_gw1.31.136.1	putative alpha-N-acetylglucosaminidase	2289	-1.67807	3.63333	0.358494	0.428201	1.71783e-11	8.3012e-11	ENOG410XNMK(S:Function unknown)	ENOG410XNMK(alpha-N-acetylglucosaminidase)	PF05089.12(NAGLU:Alpha-N-acetylglucosaminidase (NAGLU) tim-barrel domain); PF12972.7(NAGLU_C:Alpha-N-acetylglucosaminidase (NAGLU) C-terminal domain); PF12971.7(NAGLU_N:Alpha-N-acetylglucosaminidase (NAGLU) N-terminal domain)	sp|P54802|ANAG_HUMAN(Alpha-N-acetylglucosaminidase OS=Homo sapiens OX=9606 GN=NAGLU PE=1 SV=2)
92053	e_gw1.36.107.1	Transport protein particle (TRAPP) component	780	0.643936	0.124775	0.0187846	0.0285877	0.594028	0.682196	ENOG410YUYH(U:Intracellular trafficking, secretion, and vesicular transport)	ENOG410YUYH(trafficking protein particle complex)	PF04051.16(TRAPP:Transport protein particle (TRAPP) component)	sp|F1QMV3|TPC6B_DANRE(Trafficking protein particle complex subunit 6b OS=Danio rerio OX=7955 GN=trappc6b PE=2 SV=1)
92157	e_gw1.37.9.1	autophagy protein Atg13	2814	1.43425	0.334147	3.33e-26	1.64e-25	5.9728e-05	0.00017176	ENOG410Y4BP(U:Intracellular trafficking, secretion, and vesicular transport)	ENOG410Y4BP(Activates the ATG1 kinase in a nutritional condition dependent manner through the TOR pathway, leading to autophagy. Also invoved in cytoplasm to vacuole transport (Cvt) and more specifically in Cvt vesicle formation. Seems to play a role in the switching machinery regulating the conversion between the Cvt pathway and autophagy. Finally, ATG13 is also required for glycogen storage dur…	PF10033.9(ATG13:Autophagy-related protein 13)	sp|I1RW37|ATG13_GIBZE(Autophagy-related protein 13 OS=Gibberella zeae (strain PH-1 / ATCC MYA-4620 / FGSC 9075 / NRRL 31084) OX=229533 GN=ATG13 PE=3 SV=1)
92706	e_gw1.41.28.1	ARM repeat-containing protein	2988	1.08609	-0.0702864	4.36e-20	1.8e-19	0.442116	0.550429	ENOG410XT8Y(U:Intracellular trafficking, secretion, and vesicular transport)	ENOG410XT8Y(importin 13)	PF08389.12(Xpo1:Exportin 1-like protein)	sp|Q09796|KA111_SCHPO(Importin beta-like protein kap111 OS=Schizosaccharomyces pombe (strain 972 / ATCC 24843) OX=284812 GN=kap111 PE=3 SV=1)
92800	e_gw1.42.5.1	Exocyst complex subunit Sec15-like protein	2325	1.15332	0.056634	1.15e-29	6.25e-29	0.491672	0.589293	ENOG410XQAE(U:Intracellular trafficking, secretion, and vesicular transport)	ENOG410XQAE(Exocyst complex component)	PF04091.12(Sec15:Exocyst complex subunit Sec15-like)	sp|O75006|SEC15_SCHPO(Exocyst complex component sec15 OS=Schizosaccharomyces pombe (strain 972 / ATCC 24843) OX=284812 GN=sec15 PE=3 SV=2)
92814	e_gw1.42.39.1	DDHD domain-containing protein	2775	0.486374	-0.959869	1.58e-07	3.76e-07	3.85116e-33	3.69695e-32	ENOG410YDSX(S:Function unknown)	ENOG410YDSX(DDHD domain containing)	PF02862.17(DDHD:DDHD domain)	sp|Q7LKZ6|YJMD_SCHPO(Probable phospholipase C1020.13c OS=Schizosaccharomyces pombe (strain 972 / ATCC 24843) OX=284812 GN=SPCC1020.13c PE=3 SV=1)
93001	e_gw1.45.30.1	PGAP1-domain containing protein	3099	0.899795	0.416469	9.42e-16	3.35e-15	8.9589e-07	3.08429e-06	ENOG410YD9N(U:Intracellular trafficking, secretion, and vesicular transport)	ENOG410YD9N(post-GPI attachment to proteins 1)	PF07819.13(PGAP1:PGAP1-like protein); PF12697.7(Abhydrolase_6:Alpha/beta hydrolase family)	sp|Q7SAM0|BST1_NEUCR(GPI inositol-deacylase OS=Neurospora crassa (strain ATCC 24698 / 74-OR23-1A / CBS 708.71 / DSM 1257 / FGSC 987) OX=367110 GN=bst-1 PE=3 SV=1)
93741	estExt_Genewise1Plus.C_1_t10100	Cse1-domain containing protein	2880	1.27863	-0.486531	2.5e-54	2.07e-53	5.69968e-15	3.26189e-14	COG5657(S:Function unknown)	COG5657(Tuberous sclerosis 2)	PF03378.15(CAS_CSE1:CAS/CSE protein, C-terminus); PF08506.10(Cse1:Cse1); PF03810.19(IBN_N:Importin-beta N-terminal domain)	sp|P33307|CSE1_YEAST(Importin alpha re-exporter OS=Saccharomyces cerevisiae (strain ATCC 204508 / S288c) OX=559292 GN=CSE1 PE=1 SV=2)
93876	estExt_Genewise1Plus.C_1_t10396	SNARE-like protein	635	0.868051	0.36603	9.29e-16	3.31e-15	0.000346208	0.000912506	COG5541(U:Intracellular trafficking, secretion, and vesicular transport)	COG5541(vesicle-mediated transport)	PF01217.20(Clat_adaptor_s:Clathrin adaptor complex small chain)	sp|O74891|COPZ_SCHPO(Probable coatomer subunit zeta OS=Schizosaccharomyces pombe (strain 972 / ATCC 24843) OX=284812 GN=ret3 PE=3 SV=1)
94132	estExt_Genewise1Plus.C_1_t20428	sorting nexin-41	2082	0.124858	-0.22634	0.08496	0.116116	0.00286004	0.00652535	COG5391(S:Function unknown)	COG5391(-)	PF00787.24(PX:PX domain); PF09325.10(Vps5:Vps5 C terminal like)	sp|A0A098DRQ4|ATG20_GIBZE(Autophagy-related protein 20 OS=Gibberella zeae (strain PH-1 / ATCC MYA-4620 / FGSC 9075 / NRRL 31084) OX=229533 GN=ATG20 PE=3 SV=1)
94248	estExt_Genewise1Plus.C_1_t30109	alpha-soluble NSF attachment protein	1167	0.297342	-0.439893	5.06e-06	1.09e-05	5.03192e-13	2.63976e-12	ENOG410XPQ6(U:Intracellular trafficking, secretion, and vesicular transport)	ENOG410XPQ6(attachment protein)	PF14938.6(SNAP:Soluble NSF attachment protein, SNAP); PF13424.6(TPR_12:Tetratricopeptide repeat)	sp|Q9P4X4|SEC17_SCHPO(Probable vesicular-fusion protein sec17 homolog OS=Schizosaccharomyces pombe (strain 972 / ATCC 24843) OX=284812 GN=sec17 PE=1 SV=1)
94375	estExt_Genewise1Plus.C_1_t30371	Exocyst complex component Sec6	2621	0.609579	0.0949116	4.29e-11	1.25e-10	0.365274	0.473822	COG5173(U:Intracellular trafficking, secretion, and vesicular transport)	COG5173(Exocyst complex component)	PF06046.13(Sec6:Exocyst complex component Sec6); PF04100.12(Vps53_N:Vps53-like, N-terminal)	sp|O74846|SEC6_SCHPO(Exocyst complex component sec6 OS=Schizosaccharomyces pombe (strain 972 / ATCC 24843) OX=284812 GN=sec6 PE=1 SV=2)
94618	estExt_Genewise1Plus.C_1_t40475	Coatomer%2C alpha subunit	3787	0.648976	0.366715	1.3e-62	1.18e-61	8.70398e-19	5.81984e-18	ENOG410XPZS(S:Function unknown)	ENOG410XPZS(Coatomer protein complex subunit alpha)	PF04053.14(Coatomer_WDAD:Coatomer WD associated region); PF06957.11(COPI_C:Coatomer (COPI) alpha subunit C-terminus); PF00400.32(WD40:WD domain, G-beta repeat); PF12894.7(ANAPC4_WD40:Anaphase-promoting complex subunit 4 WD40 domain)	sp|Q96WV5|COPA_SCHPO(Putative coatomer subunit alpha OS=Schizosaccharomyces pombe (strain 972 / ATCC 24843) OX=284812 GN=SPBPJ4664.04 PE=1 SV=1)
95082	estExt_Genewise1Plus.C_2_t10011	Sec7-domain containing protein	4671	1.06354	0.230897	6.86e-64	6.29e-63	5.26502e-05	0.000152448	COG5307(B:Chromatin structure and dynamics); COG5307(K:Transcription)	COG5307(SWI SNF related, matrix associated, actin dependent regulator of chromatin, subfamily c, member); COG5307(SWI SNF related, matrix associated, actin dependent regulator of chromatin, subfamily c, member)	PF01369.20(Sec7:Sec7 domain); PF12783.7(Sec7_N:Guanine nucleotide exchange factor in Golgi transport N-terminal)	sp|Q9P7R8|YHV3_SCHPO(Uncharacterized protein C211.03 OS=Schizosaccharomyces pombe (strain 972 / ATCC 24843) OX=284812 GN=SPBC211.03c PE=1 SV=1)
95377	estExt_Genewise1Plus.C_2_t20140	Protein import receptor MAS20	663	1.11923	0.299691	6.73e-30	3.67e-29	0.00128499	0.00310315	ENOG4111NAH(U:Intracellular trafficking, secretion, and vesicular transport)	ENOG4111NAH(Translocase of outer mitochondrial membrane 20 homolog)	PF02064.15(MAS20:MAS20 protein import receptor)	sp|P35848|TOM20_NEUCR(Mitochondrial import receptor subunit tom20 OS=Neurospora crassa (strain ATCC 24698 / 74-OR23-1A / CBS 708.71 / DSM 1257 / FGSC 987) OX=367110 GN=tom20 PE=3 SV=1)
95413	estExt_Genewise1Plus.C_2_t20224	putative nuclear pore protein	1585	0.771523	-0.129438	0.0018796	0.00323902	0.515826	0.614186	ENOG410XRNW(U:Intracellular trafficking, secretion, and vesicular transport)	ENOG410XRNW(SEH1-like (S. cerevisiae)	PF00400.32(WD40:WD domain, G-beta repeat)	sp|G0S450|SEH1_CHATD(Nucleoporin SEH1 OS=Chaetomium thermophilum (strain DSM 1495 / CBS 144.50 / IMI 039719) OX=759272 GN=SEH1 PE=3 SV=1)
95436	estExt_Genewise1Plus.C_2_t20282	ARM repeat-containing protein	3115	0.383262	-0.310199	3.45e-08	8.51e-08	4.29214e-07	1.51543e-06	ENOG410XRKT(U:Intracellular trafficking, secretion, and vesicular transport)	ENOG410XRKT(transportin 3)	PF08389.12(Xpo1:Exportin 1-like protein)	sp|Q9USZ2|YNR7_SCHPO(Uncharacterized protein C11G11.07 OS=Schizosaccharomyces pombe (strain 972 / ATCC 24843) OX=284812 GN=SPBC11G11.07 PE=4 SV=2)
95708	estExt_Genewise1Plus.C_2_t30295	mitochondrial import inner membrane translocase subunit TIM13	594	1.43387	0.305282	6.59e-71	6.56e-70	0.000106348	0.000297863	ENOG41124YI(O:Posttranslational modification, protein turnover, chaperones)	ENOG41124YI(Mitochondrial intermembrane chaperone that participates in the import and insertion of some multi-pass transmembrane proteins into the mitochondrial inner membrane. Also required for the transfer of beta-barrel precursors from the TOM complex to the sorting and assembly machinery (SAM complex) of the outer membrane. Acts as a chaperone-like protein that protects the hydrophobic precur…	PF02953.15(zf-Tim10_DDP:Tim10/DDP family zinc finger)	sp|Q4I6B0|TIM13_GIBZE(Mitochondrial import inner membrane translocase subunit TIM13 OS=Gibberella zeae (strain PH-1 / ATCC MYA-4620 / FGSC 9075 / NRRL 31084) OX=229533 GN=TIM13 PE=3 SV=1)
96412	estExt_Genewise1Plus.C_3_t20272	expressed protein	607	-0.862238	-0.520924	6e-18	2.3e-17	3.53798e-06	1.15527e-05	ENOG4111YD4(U:Intracellular trafficking, secretion, and vesicular transport)	ENOG4111YD4(-)		sp|Q09730|SFT1_SCHPO(Protein transport protein sft1 OS=Schizosaccharomyces pombe (strain 972 / ATCC 24843) OX=284812 GN=sft1 PE=3 SV=1)
96543	estExt_Genewise1Plus.C_3_t30066	hypothetical protein	2356	-1.19228	-0.668299	2.84e-24	1.33e-23	8.12106e-05	0.000229964	ENOG410ZQDJ(S:Function unknown)	ENOG410ZQDJ(Domain of unknown function (DUF2828))	PF11443.8(DUF2828:Domain of unknown function (DUF2828))	sp|Q5UNY4|YL728_MIMIV(Uncharacterized protein L728 OS=Acanthamoeba polyphaga mimivirus OX=212035 GN=MIMI_L728 PE=4 SV=1)
96585	estExt_Genewise1Plus.C_3_t30230	endosomal integral membrane protein	2067	0.776375	0.180471	1.17e-27	6.05e-27	0.00881128	0.0183441	ENOG410XPIW(S:Function unknown)	ENOG410XPIW(transmembrane 9 superfamily)	PF02990.16(EMP70:Endomembrane protein 70)	sp|P32802|TMN1_YEAST(Transmembrane 9 superfamily member 1 OS=Saccharomyces cerevisiae (strain ATCC 204508 / S288c) OX=559292 GN=EMP70 PE=1 SV=2)
96610	estExt_Genewise1Plus.C_3_t30309	putative importin beta-5 subunit	3183	0.266049	-0.307578	0.00055359	0.00100468	1.04048e-10	4.78559e-10	COG5657(O:Posttranslational modification, protein turnover, chaperones)	COG5657(Importin)	PF03810.19(IBN_N:Importin-beta N-terminal domain)	sp|Q10297|IMB5_SCHPO(Importin subunit beta-5 OS=Schizosaccharomyces pombe (strain 972 / ATCC 24843) OX=284812 GN=kap114 PE=3 SV=3)
96889	estExt_Genewise1Plus.C_4_t20043	DOA4-independent degradation protein 4	767	-0.34194	0.181836	0.000299606	0.000557389	0.0639054	0.108272	COG5491(N:Cell motility)	COG5491(Charged multivesicular body protein)	PF03357.21(Snf7:Snf7)	sp|Q6DFS6|CHM2A_XENTR(Charged multivesicular body protein 2a OS=Xenopus tropicalis OX=8364 GN=chmp2a PE=2 SV=1)
97132	estExt_Genewise1Plus.C_4_t30017	vacuolar protein sorting 33A-like protein	5432	0.583685	-0.318817	5.03e-17	1.87e-16	1.22907e-07	4.56596e-07	COG5158(U:Intracellular trafficking, secretion, and vesicular transport)	COG5158(Vacuolar Protein)	PF00995.23(Sec1:Sec1 family); PF01593.24(Amino_oxidase:Flavin containing amine oxidoreductase); PF04433.17(SWIRM:SWIRM domain); PF00505.19(HMG_box:HMG (high mobility group) box); PF13450.6(NAD_binding_8:NAD(P)-binding Rossmann-like domain); PF09011.10(HMG_box_2:HMG-box domain)	sp|Q63615|VP33A_RAT(Vacuolar protein sorting-associated protein 33A OS=Rattus norvegicus OX=10116 GN=Vps33a PE=1 SV=1)
97158	estExt_Genewise1Plus.C_4_t30076	hypothetical protein	1541	1.52356	1.29768	0.193218	0.246657	0.205332	0.295145	ENOG410YPCF(S:Function unknown); COG0563(F:Nucleotide transport and metabolism); ENOG4110WA8(S:Function unknown); ENOG410YXFQ(S:Function unknown)	ENOG410YPCF(-); COG0563(Catalyzes the reversible transfer of the terminal phosphate group between ATP and AMP. Plays an important role in cellular energy homeostasis and in adenine nucleotide metabolism (By similarity)); ENOG4110WA8(-); ENOG410YXFQ(-)	PF11559.8(ADIP:Afadin- and alpha -actinin-Binding)
97323	estExt_Genewise1Plus.C_5_t10331	peroxisomal membrane protein	1473	0.421984	0.454032	0.0128871	0.0200955	0.00107752	0.00262612	ENOG4111GEA(S:Function unknown)	ENOG4111GEA(Peroxisomal membrane protein)	PF08610.10(Pex16:Peroxisomal membrane protein (Pex16))	sp|P78980|PEX16_YARLI(Peroxisomal membrane protein PEX16 OS=Yarrowia lipolytica (strain CLIB 122 / E 150) OX=284591 GN=PEX16 PE=3 SV=1)
98032	estExt_Genewise1Plus.C_6_t20468	protein transport protein sec22	913	-0.564781	0.385023	1.91e-18	7.47e-18	1.93121e-05	5.87297e-05	COG5143(U:Intracellular trafficking, secretion, and vesicular transport)	COG5143(Vesicle-associated membrane protein)	PF13774.6(Longin:Regulated-SNARE-like domain); PF00957.21(Synaptobrevin:Synaptobrevin)	sp|Q9Y7L0|SEC22_SCHPO(Protein transport protein sec22 OS=Schizosaccharomyces pombe (strain 972 / ATCC 24843) OX=284812 GN=sec22 PE=3 SV=2)
98268	estExt_Genewise1Plus.C_7_t10303	hypothetical protein	2997	0.857331	0.195685	6.48e-21	2.75e-20	0.00277858	0.00636302	ENOG410XS6Z(S:Function unknown); ENOG410XQV3(S:Function unknown)	ENOG410XS6Z(Lethal giant larvae homolog); ENOG410XQV3(SNARE-dependent exocytosis protein)	PF08596.10(Lgl_C:Lethal giant larvae(Lgl) like, C-terminal); PF00400.32(WD40:WD domain, G-beta repeat)	sp|P38163|SRO77_YEAST(Lethal(2) giant larvae protein homolog SRO77 OS=Saccharomyces cerevisiae (strain ATCC 204508 / S288c) OX=559292 GN=SRO77 PE=1 SV=2)
98530	estExt_Genewise1Plus.C_7_t20439	VHS domain-containing protein	2239	1.34122	0.284065	1.89e-67	1.81e-66	0.000323212	0.000854328	ENOG410Y26G(S:Function unknown)	ENOG410Y26G(gamma adaptin ear containing, arf binding protein)	PF00790.19(VHS:VHS domain); PF02883.20(Alpha_adaptinC2:Adaptin C-terminal domain); PF03127.14(GAT:GAT domain); PF18308.1(GGA_N-GAT:GGA N-GAT domain)	sp|P38817|GGA2_YEAST(ADP-ribosylation factor-binding protein GGA2 OS=Saccharomyces cerevisiae (strain ATCC 204508 / S288c) OX=559292 GN=GGA2 PE=1 SV=1)
98591	estExt_Genewise1Plus.C_7_t30029	putative nuclear import and export protein Msn5	4541	0.0703147	0.284977	0.359602	0.428963	2.37984e-05	7.16663e-05	COG5101(U:Intracellular trafficking, secretion, and vesicular transport)	COG5101(exportin)	PF03810.19(IBN_N:Importin-beta N-terminal domain); PF08389.12(Xpo1:Exportin 1-like protein)	sp|O14116|YKX1_SCHPO(Uncharacterized protein C328.01c OS=Schizosaccharomyces pombe (strain 972 / ATCC 24843) OX=284812 GN=SPAC328.01c PE=4 SV=2)
98597	estExt_Genewise1Plus.C_7_t30038	protein transport protein SEC24	2510	0.398001	0.263442	3.89e-20	1.62e-19	3.63382e-07	1.29038e-06	COG5028(S:Function unknown)	COG5028(-)	PF04811.15(Sec23_trunk:Sec23/Sec24 trunk domain); PF04815.15(Sec23_helical:Sec23/Sec24 helical domain); PF08033.12(Sec23_BS:Sec23/Sec24 beta-sandwich domain); PF04810.15(zf-Sec23_Sec24:Sec23/Sec24 zinc finger); PF00626.22(Gelsolin:Gelsolin repeat)	sp|Q2HH63|SEC24_CHAGB(Protein transport protein SEC24 OS=Chaetomium globosum (strain ATCC 6205 / CBS 148.51 / DSM 1962 / NBRC 6347 / NRRL 1970) OX=306901 GN=SEC24 PE=3 SV=1)
98730	estExt_Genewise1Plus.C_8_t10073	putative multispanning membrane protein	2349	1.36476	0.34619	6.37e-13	2.02e-12	0.00484286	0.0106476	ENOG410XPIW(S:Function unknown)	ENOG410XPIW(arrestin (or S-antigen), N-terminal domain protein)	PF02990.16(EMP70:Endomembrane protein 70)	sp|Q9LIC2|TMN7_ARATH(Transmembrane 9 superfamily member 7 OS=Arabidopsis thaliana OX=3702 GN=TMN7 PE=2 SV=1)
98970	estExt_Genewise1Plus.C_8_t20012	expressed protein	699	-0.205409	0.179493	0.171263	0.220544	0.312644	0.41743	ENOG4111W10(U:Intracellular trafficking, secretion, and vesicular transport)	ENOG4111W10(Blocked early in transport 1 homolog (S)	PF09753.9(Use1:Membrane fusion protein Use1)	sp|P22804|BET1_YEAST(Protein transport protein BET1 OS=Saccharomyces cerevisiae (strain ATCC 204508 / S288c) OX=559292 GN=BET1 PE=1 SV=1)
99152	estExt_Genewise1Plus.C_9_t10057	Dor1-like protein	1315	1.46319	0.671617	1.31e-13	4.29e-13	7.62902e-05	0.000216827	ENOG410XNZ7(S:Function unknown)	ENOG410XNZ7(Oligomeric golgi complex)	PF04124.12(Dor1:Dor1-like family)	sp|Q96WW5|COG8_SCHPO(Conserved oligomeric Golgi complex subunit 8 OS=Schizosaccharomyces pombe (strain 972 / ATCC 24843) OX=284812 GN=cog8 PE=3 SV=2)
99165	estExt_Genewise1Plus.C_9_t10079	hypothetical protein	1355	-0.292284	0.493344	5.6e-07	1.28e-06	2.96968e-21	2.1403e-20	ENOG410Y3Y0(U:Intracellular trafficking, secretion, and vesicular transport)	ENOG410Y3Y0(Synaptosomal-associated protein)		sp|Q6C5G0|SEC9_YARLI(Protein transport protein SEC9 OS=Yarrowia lipolytica (strain CLIB 122 / E 150) OX=284591 GN=SEC9 PE=3 SV=1)
99283	estExt_Genewise1Plus.C_9_t10297	nuclear pore complex protein Nup107	2766	0.759787	0.0911722	3.03e-12	9.32e-12	0.294496	0.39698	ENOG410XRUG(U:Intracellular trafficking, secretion, and vesicular transport)	ENOG410XRUG(nuclear pore complex protein)	PF04121.13(Nup84_Nup100:Nuclear pore protein 84 / 107)	sp|G0SER9|NUP84_CHATD(Nucleoporin NUP84 OS=Chaetomium thermophilum (strain DSM 1495 / CBS 144.50 / IMI 039719) OX=759272 GN=NUP84 PE=3 SV=1)
99637	estExt_Genewise1Plus.C_10_t10254	hypothetical protein	2113	1.48336	0.327266	3.76e-120	5.45e-119	5.6978e-07	1.99423e-06	ENOG4111MIJ(S:Function unknown)	ENOG4111MIJ(Conserved hypothetical, protein)		sp|P11655|SEC12_YEAST(Guanine nucleotide-exchange factor SEC12 OS=Saccharomyces cerevisiae (strain ATCC 204508 / S288c) OX=559292 GN=SEC12 PE=1 SV=1)
100083	estExt_Genewise1Plus.C_11_t10372	mitochondrial outer membrane 72K protein	1975	1.06707	-0.236182	1.64e-44	1.17e-43	0.000717394	0.00179864	ENOG410YVNZ(U:Intracellular trafficking, secretion, and vesicular transport)	ENOG410YVNZ(translocase of outer mitochondrial membrane 70 homolog A (S. cerevisiae))	PF00515.28(TPR_1:Tetratricopeptide repeat); PF07719.17(TPR_2:Tetratricopeptide repeat); PF13181.6(TPR_8:Tetratricopeptide repeat); PF13431.6(TPR_17:Tetratricopeptide repeat); PF13432.6(TPR_16:Tetratricopeptide repeat); PF13424.6(TPR_12:Tetratricopeptide repeat); PF13414.6(TPR_11:TPR repeat); PF14559.6(TPR_19:Tetratricopeptide repeat); PF13428.6(TPR_14:Tetratricopeptide repeat); PF13371.6(TPR_9:Te…	sp|P23231|TOM70_NEUCR(Mitochondrial import receptor subunit tom70 OS=Neurospora crassa (strain ATCC 24698 / 74-OR23-1A / CBS 708.71 / DSM 1257 / FGSC 987) OX=367110 GN=tom70 PE=2 SV=3)
100105	estExt_Genewise1Plus.C_11_t10401	Pex19-domain containing protein	1349	1.26421	0.370082	8.8e-39	5.75e-38	4.17072e-05	0.00012241	ENOG4111QGU(O:Posttranslational modification, protein turnover, chaperones)	ENOG4111QGU(peroxisomal biogenesis factor 19)	PF04614.12(Pex19:Pex19 protein family)	sp|Q9SRQ3|PE191_ARATH(Peroxisome biogenesis protein 19-1 OS=Arabidopsis thaliana OX=3702 GN=PEX19-1 PE=1 SV=1)
100404	estExt_Genewise1Plus.C_12_t10147	Ras-domain containing protein	854	0.0164128	-0.0485109	0.874346	0.902666	0.43371	0.541933	ENOG410YCCP(U:Intracellular trafficking, secretion, and vesicular transport)	ENOG410YCCP(Multifunctional regulator of mitochondrial architecture and protein biogenesis. May act in concert with ATP synthase dimers to generate inner membrane structure and consequently normal mitochondrial morphology. Plays a role in keeping cristae membranes connected to the inner boundary membrane. Promotes protein import via the mitochondrial intermembrane space assembly (MIA) pathway (By…	PF00071.22(Ras:Ras family); PF08477.13(Roc:Ras of Complex, Roc, domain of DAPkinase); PF00025.21(Arf:ADP-ribosylation factor family); PF04670.12(Gtr1_RagA:Gtr1/RagA G protein conserved region); PF00009.27(GTP_EFTU:Elongation factor Tu GTP binding domain); PF01926.23(MMR_HSR1:50S ribosome-binding GTPase)	sp|P36586|YPT5_SCHPO(GTP-binding protein ypt5 OS=Schizosaccharomyces pombe (strain 972 / ATCC 24843) OX=284812 GN=ypt5 PE=1 SV=1)
100589	estExt_Genewise1Plus.C_12_t20044	transporter particle component	1038	0.0732802	-0.0451054	0.387844	0.458929	0.571754	0.661129	ENOG410Z1VV(U:Intracellular trafficking, secretion, and vesicular transport)	ENOG410Z1VV(trafficking protein particle complex)	PF04051.16(TRAPP:Transport protein particle (TRAPP) component)	sp|P36149|BET3_YEAST(Trafficking protein particle complex subunit BET3 OS=Saccharomyces cerevisiae (strain ATCC 204508 / S288c) OX=559292 GN=BET3 PE=1 SV=1)
100740	estExt_Genewise1Plus.C_13_t10237	expressed protein	1707	-0.164787	-0.240791	0.00533664	0.0087153	2.6415e-06	8.70529e-06	ENOG410XRU7(U:Intracellular trafficking, secretion, and vesicular transport)	ENOG410XRU7(Peroxisomal membrane protein)	PF04088.13(Peroxin-13_N:Peroxin 13, N-terminal region); PF07653.17(SH3_2:Variant SH3 domain); PF00018.28(SH3_1:SH3 domain); PF14604.6(SH3_9:Variant SH3 domain)	sp|P80667|PEX13_YEAST(Peroxisomal membrane protein PAS20 OS=Saccharomyces cerevisiae (strain ATCC 204508 / S288c) OX=559292 GN=PEX13 PE=1 SV=1)
101342	estExt_Genewise1Plus.C_15_t10117	signal sequence receptor alpha subunit	2184	0.426357	0.0498076	1.87e-10	5.28e-10	0.389952	0.499324	COG0552(U:Intracellular trafficking, secretion, and vesicular transport)	COG0552(Involved in targeting and insertion of nascent membrane proteins into the cytoplasmic membrane. Acts as a receptor for the complex formed by the signal recognition particle (SRP) and the ribosome-nascent chain (RNC))	PF04086.13(SRP-alpha_N:Signal recognition particle, alpha subunit, N-terminal); PF00448.22(SRP54:SRP54-type protein, GTPase domain); PF02881.19(SRP54_N:SRP54-type protein, helical bundle domain); PF03308.16(MeaB:Methylmalonyl Co-A mutase-associated GTPase MeaB); PF13604.6(AAA_30:AAA domain); PF13207.6(AAA_17:AAA domain)	sp|O43032|SRPR_SCHPO(Signal recognition particle receptor subunit alpha homolog OS=Schizosaccharomyces pombe (strain 972 / ATCC 24843) OX=284812 GN=srp101 PE=3 SV=1)
101422	estExt_Genewise1Plus.C_15_t10326	Ras-domain containing protein	876	0.191478	0.0416545	0.0033596	0.00561947	0.512938	0.611062	ENOG410YCCP(S:Function unknown)	ENOG410YCCP(member RAS oncogene family)	PF00071.22(Ras:Ras family); PF08477.13(Roc:Ras of Complex, Roc, domain of DAPkinase); PF00025.21(Arf:ADP-ribosylation factor family); PF00009.27(GTP_EFTU:Elongation factor Tu GTP binding domain); PF04670.12(Gtr1_RagA:Gtr1/RagA G protein conserved region); PF01926.23(MMR_HSR1:50S ribosome-binding GTPase); PF13191.6(AAA_16:AAA ATPase domain)	sp|P36017|VPS21_YEAST(Vacuolar protein sorting-associated protein 21 OS=Saccharomyces cerevisiae (strain ATCC 204508 / S288c) OX=559292 GN=VPS21 PE=1 SV=1)
101594	estExt_Genewise1Plus.C_16_t10144	SPX-domain containing protein	1383	0.29677	0.00880066	0.00607684	0.00986932	0.894902	0.930811	ENOG411278X(S:Function unknown)	ENOG411278X(SPX domain)	PF03105.19(SPX:SPX domain)
101729	estExt_Genewise1Plus.C_16_t10413	mitochondrial import receptor subunit TOM40	1235	0.476954	-0.326742	2.02e-14	6.86e-14	2.43452e-06	8.03461e-06	ENOG410XS2U(O:Posttranslational modification, protein turnover, chaperones)	ENOG410XS2U(Translocase of outer mitochondrial membrane 40 homolog)	PF01459.22(Porin_3:Eukaryotic porin)	sp|P24391|TOM40_NEUCR(Mitochondrial import receptor subunit tom40 OS=Neurospora crassa (strain ATCC 24698 / 74-OR23-1A / CBS 708.71 / DSM 1257 / FGSC 987) OX=367110 GN=tom40 PE=1 SV=1)
102083	estExt_Genewise1Plus.C_18_t10099	hypothetical protein	4041	0.477347	-0.0613087	2.86e-09	7.57e-09	0.317686	0.422637	COG5307(O:Posttranslational modification, protein turnover, chaperones)	COG5307(microsomal glutathione S-transferase)	PF01369.20(Sec7:Sec7 domain); PF00169.29(PH:PH domain)	sp|O13817|SEC7C_SCHPO(Protein transport protein sec73 OS=Schizosaccharomyces pombe (strain 972 / ATCC 24843) OX=284812 GN=sec73 PE=3 SV=2)
102085	estExt_Genewise1Plus.C_18_t10108	hypothetical protein	2138	1.1625	0.353263	9.96e-45	7.14e-44	1.13008e-05	3.52233e-05	ENOG410XRWI(U:Intracellular trafficking, secretion, and vesicular transport)	ENOG410XRWI(Signal-recognition-particle assembly has a crucial role in targeting secretory proteins to the rough endoplasmic reticulum membrane (By similarity))	PF17004.5(SRP_TPR_like:Putative TPR-like repeat); PF08492.12(SRP72:SRP72 RNA-binding domain); PF12895.7(ANAPC3:Anaphase-promoting complex, cyclosome, subunit 3)	sp|P33731|SRP72_CANLF(Signal recognition particle subunit SRP72 OS=Canis lupus familiaris OX=9615 GN=SRP72 PE=1 SV=3)
102104	estExt_Genewise1Plus.C_18_t10136	clathrin light chain	1004	0.876395	0.0875044	1.59e-42	1.1e-41	0.187179	0.273167	ENOG4111J5K(U:Intracellular trafficking, secretion, and vesicular transport)	ENOG4111J5K(clathrin light chain)	PF01086.17(Clathrin_lg_ch:Clathrin light chain)	sp|Q9USP6|CLC1_SCHPO(Clathrin light chain OS=Schizosaccharomyces pombe (strain 972 / ATCC 24843) OX=284812 GN=clc1 PE=1 SV=1)
102110	estExt_Genewise1Plus.C_18_t10142	ATP-dependent permease MDL2	2536	0.903903	0.0949383	3.67e-49	2.81e-48	0.116834	0.182724	COG1132(S:Function unknown)	COG1132(Regulation of nuclear pre-mRNA domain containing)	PF00664.23(ABC_membrane:ABC transporter transmembrane region); PF00005.27(ABC_tran:ABC transporter); PF02463.19(SMC_N:RecF/RecN/SMC N terminal domain)	sp|Q4WPP6|MDR2_ASPFU(ABC multidrug transporter mdr2 OS=Neosartorya fumigata (strain ATCC MYA-4609 / Af293 / CBS 101355 / FGSC A1100) OX=330879 GN=mdr2 PE=2 SV=1)
102155	estExt_Genewise1Plus.C_18_t10226	ARM repeat-containing protein	3098	0.360211	-0.158719	2.89e-08	7.16e-08	0.0026799	0.00615532	ENOG410XPK2(U:Intracellular trafficking, secretion, and vesicular transport)	ENOG410XPK2(Transportin)	PF13513.6(HEAT_EZ:HEAT-like repeat); PF02985.22(HEAT:HEAT repeat); PF13646.6(HEAT_2:HEAT repeats); PF12717.7(Cnd1:non-SMC mitotic condensation complex subunit 1); PF03810.19(IBN_N:Importin-beta N-terminal domain)	sp|O14089|IMB2_SCHPO(Importin subunit beta-2 OS=Schizosaccharomyces pombe (strain 972 / ATCC 24843) OX=284812 GN=kap104 PE=3 SV=1)
102377	estExt_Genewise1Plus.C_19_t10180	clathrin heavy chain	5417	0.389576	0.0999067	6.02e-26	2.95e-25	0.0093658	0.0193982	ENOG410XPH1(U:Intracellular trafficking, secretion, and vesicular transport)	ENOG410XPH1(clathrin heavy chain)	PF00637.20(Clathrin:Region in Clathrin and VPS); PF01394.20(Clathrin_propel:Clathrin propeller repeat); PF13838.6(Clathrin_H_link:Clathrin-H-link)	sp|P49951|CLH1_BOVIN(Clathrin heavy chain 1 OS=Bos taurus OX=9913 GN=CLTC PE=1 SV=1)
102653	estExt_Genewise1Plus.C_200313	histone H3 lysine 36 methyltransferase	3077	0.422348	0.155969	0.000518078	0.000941547	0.168432	0.249227	COG2940(S:Function unknown)	COG2940(Domain of unknown function (DUF2431))	PF08236.11(SRI:SRI (Set2 Rpb1 interacting) domain); PF00856.28(SET:SET domain); PF17907.1(AWS:AWS domain); PF00397.26(WW:WW domain); PF08711.11(Med26:TFIIS helical bundle-like domain)	sp|Q4IB50|SET2_GIBZE(Histone-lysine N-methyltransferase, H3 lysine-36 specific OS=Gibberella zeae (strain PH-1 / ATCC MYA-4620 / FGSC 9075 / NRRL 31084) OX=229533 GN=SET2 PE=3 SV=3)
102739	estExt_Genewise1Plus.C_210020	hypothetical protein	1533	0.0430882	0.236457	0.639388	0.691911	0.000513104	0.0013124	ENOG4111GG9(S:Function unknown)	ENOG4111GG9(developmental regulator VelB)	PF11754.8(Velvet:Velvet factor)	sp|G0RS98|VELB_HYPJQ(Velvet complex subunit 2 OS=Hypocrea jecorina (strain QM6a) OX=431241 GN=VEL2 PE=3 SV=2)
102872	estExt_Genewise1Plus.C_210294	GTPase activating protein	1809	0.744881	0.468731	5.48e-17	2.04e-16	3.99026e-08	1.5341e-07	ENOG410XQ68(S:Function unknown)	ENOG410XQ68(TBC1 domain family member)	PF00566.18(RabGAP-TBC:Rab-GTPase-TBC domain)	sp|O59737|GYP1_SCHPO(GTPase-activating protein gyp1 OS=Schizosaccharomyces pombe (strain 972 / ATCC 24843) OX=284812 GN=gyp1 PE=3 SV=1)
102989	estExt_Genewise1Plus.C_220116	hypothetical protein	1454	0.0900384	0.161802	0.150068	0.19532	0.005265	0.0114857	COG5196(S:Function unknown)	COG5196(Mannosylphosphorylation protein)	PF00810.18(ER_lumen_recept:ER lumen protein retaining receptor)	sp|P18414|ERD2_YEAST(ER lumen protein-retaining receptor OS=Saccharomyces cerevisiae (strain ATCC 204508 / S288c) OX=559292 GN=ERD2 PE=3 SV=1)
102999	estExt_Genewise1Plus.C_220126	hypothetical protein	1448	-0.1887	-0.159801	0.00823762	0.0131767	0.014668	0.0292411	COG5391(S:Function unknown)	COG5391(Leucine zipper-ef-hand containing transmembrane protein)	PF00787.24(PX:PX domain); PF09325.10(Vps5:Vps5 C terminal like); PF03114.18(BAR:BAR domain)	sp|I1RXT2|SNX4_GIBZE(Sorting nexin-4 OS=Gibberella zeae (strain PH-1 / ATCC MYA-4620 / FGSC 9075 / NRRL 31084) OX=229533 GN=ATG24 PE=3 SV=1)
103178	estExt_Genewise1Plus.C_230056	putative nuclear pore protein NUP57	1140	0.200844	-0.216828	0.141597	0.184902	0.137678	0.209379	ENOG410XPU5(U:Intracellular trafficking, secretion, and vesicular transport)	ENOG410XPU5(nucleoporin)	PF13874.6(Nup54:Nucleoporin complex subunit 54); PF18570.1(Nup54_57_C:NUP57/Nup54 C-terminal domain)	sp|G0S0R2|NUP57_CHATD(Nucleoporin NUP57 OS=Chaetomium thermophilum (strain DSM 1495 / CBS 144.50 / IMI 039719) OX=759272 GN=NUP57 PE=1 SV=1)
103348	estExt_Genewise1Plus.C_240167	putative coatomer subunit delta	1563	0.600244	0.433966	1.95e-28	1.03e-27	9.87388e-14	5.35597e-13	ENOG410XRH2(U:Intracellular trafficking, secretion, and vesicular transport)	ENOG410XRH2(The coatomer is a cytosolic protein complex that binds to dilysine motifs and reversibly associates with Golgi non- clathrin-coated vesicles, which further mediate biosynthetic protein transport from the ER, via the Golgi up to the trans Golgi network. Coatomer complex is required for budding from Golgi membranes, and is essential for the retrograde Golgi-to-ER transport of dilysine-t…	PF00928.21(Adap_comp_sub:Adaptor complexes medium subunit family); PF01217.20(Clat_adaptor_s:Clathrin adaptor complex small chain)	sp|P53619|COPD_BOVIN(Coatomer subunit delta OS=Bos taurus OX=9913 GN=ARCN1 PE=1 SV=1)
103389	estExt_Genewise1Plus.C_240373	hypothetical protein	1318	0.922121	0.347728	9.22e-06	1.95e-05	0.021309	0.0410905	ENOG410XQS9(S:Function unknown)	ENOG410XQS9(ras-related GTP binding)	PF04670.12(Gtr1_RagA:Gtr1/RagA G protein conserved region); PF00025.21(Arf:ADP-ribosylation factor family)	sp|O74544|GTR2_SCHPO(GTP-binding protein gtr2 OS=Schizosaccharomyces pombe (strain 972 / ATCC 24843) OX=284812 GN=gtr2 PE=3 SV=1)
103571	estExt_Genewise1Plus.C_260038	Sec1-like protein	2115	1.46691	0.699564	7.81e-44	5.52e-43	2.2856e-11	1.09704e-10	COG5158(S:Function unknown)	COG5158(C-x8-C-x5-C-x3-H type zinc finger protein)	PF00995.23(Sec1:Sec1 family)	sp|O74534|SLY1_SCHPO(Protein sly1 OS=Schizosaccharomyces pombe (strain 972 / ATCC 24843) OX=284812 GN=sly1 PE=3 SV=1)
103606	estExt_Genewise1Plus.C_260103	VAMP-associated protein	1034	0.604424	0.272689	7.47e-27	3.76e-26	4.58338e-06	1.48355e-05	COG5066(U:Intracellular trafficking, secretion, and vesicular transport)	COG5066(Central component in molecular interactions underlying sperm crawling. Forms an extensive filament system that extends from sperm villipoda, along the leading edge of the pseudopod (By similarity))	PF00635.26(Motile_Sperm:MSP (Major sperm protein) domain)	sp|Q10484|YDFC_SCHPO(Uncharacterized protein C17C9.12 OS=Schizosaccharomyces pombe (strain 972 / ATCC 24843) OX=284812 GN=SPAC17C9.12 PE=1 SV=2)
103811	estExt_Genewise1Plus.C_270222	vesicle-mediated transporter Vid24	804	0.0920529	0.168302	0.616088	0.668602	0.252638	0.349673	COG5073(U:Intracellular trafficking, secretion, and vesicular transport)	COG5073(GID complex subunit 4, VID24 homolog (S. cerevisiae))	PF09783.9(Vac_ImportDeg:Vacuolar import and degradation protein)	sp|Q8IVV7|GID4_HUMAN(Glucose-induced degradation protein 4 homolog OS=Homo sapiens OX=9606 GN=GID4 PE=1 SV=1)
103910	estExt_Genewise1Plus.C_280069	hypothetical protein	2562	0.815911	0.459173	3.35e-76	3.5e-75	6.79452e-22	4.98624e-21	COG5047(U:Intracellular trafficking, secretion, and vesicular transport)	COG5047(transport protein)	PF04811.15(Sec23_trunk:Sec23/Sec24 trunk domain); PF08033.12(Sec23_BS:Sec23/Sec24 beta-sandwich domain); PF04815.15(Sec23_helical:Sec23/Sec24 helical domain); PF04810.15(zf-Sec23_Sec24:Sec23/Sec24 zinc finger); PF00626.22(Gelsolin:Gelsolin repeat)	sp|Q2HB00|SEC23_CHAGB(Protein transport protein SEC23 OS=Chaetomium globosum (strain ATCC 6205 / CBS 148.51 / DSM 1962 / NBRC 6347 / NRRL 1970) OX=306901 GN=SEC23 PE=3 SV=1)
104087	estExt_Genewise1Plus.C_290057	hypothetical protein	1994	0.4227	0.0449891	3.85e-06	8.37e-06	0.588368	0.676283	ENOG410XPW1(U:Intracellular trafficking, secretion, and vesicular transport)	ENOG410XPW1(Signal-recognition-particle assembly has a crucial role in targeting secretory proteins to the rough endoplasmic reticulum membrane (By similarity))	PF16969.5(SRP68:RNA-binding signal recognition particle 68)	sp|Q9UHB9|SRP68_HUMAN(Signal recognition particle subunit SRP68 OS=Homo sapiens OX=9606 GN=SRP68 PE=1 SV=2)
104261	estExt_Genewise1Plus.C_300159	coatomer beta	2807	0.235961	0.136885	1.92e-08	4.82e-08	0.00453594	0.0100228	ENOG410XNNY(S:Function unknown)	ENOG410XNNY(coatomer protein complex, subunit beta 2 (beta prime))	PF04053.14(Coatomer_WDAD:Coatomer WD associated region); PF00400.32(WD40:WD domain, G-beta repeat)	sp|P35606|COPB2_HUMAN(Coatomer subunit beta' OS=Homo sapiens OX=9606 GN=COPB2 PE=1 SV=2)
104410	estExt_Genewise1Plus.C_320036	putative HDEL sequence binding protein	752	0.586166	0.234341	1.1e-14	3.76e-14	0.0112069	0.0229343	COG5196(U:Intracellular trafficking, secretion, and vesicular transport)	COG5196(Required for the retention of luminal endoplasmic reticulum proteins. Determines the specificity of the luminal ER protein retention system. Also required for normal vesicular traffic through the Golgi (By similarity))	PF00810.18(ER_lumen_recept:ER lumen protein retaining receptor)	sp|O76767|ERD2_DROME(ER lumen protein-retaining receptor OS=Drosophila melanogaster OX=7227 GN=KdelR PE=2 SV=1)
104464	estExt_Genewise1Plus.C_330027	hypothetical protein	1042	-0.0716504	0.848187	0.5126	0.580336	3.28758e-22	2.43581e-21	ENOG410XST0(U:Intracellular trafficking, secretion, and vesicular transport)	ENOG410XST0(Solute carrier family 35 member C1)	PF03151.16(TPT:Triose-phosphate Transporter family)	sp|Q9UUI8|YIY4_SCHPO(Uncharacterized transporter C22F8.04 OS=Schizosaccharomyces pombe (strain 972 / ATCC 24843) OX=284812 GN=SPAC22F8.04 PE=3 SV=1)
104627	estExt_Genewise1Plus.C_350128	EXS-domain containing protein	1369	1.27379	0.630544	5.17e-20	2.13e-19	0.000544574	0.00138905	COG5409(T:Signal transduction mechanisms)	COG5409(Xenotropic and polytropic retrovirus receptor 1)	PF03124.14(EXS:EXS family)	sp|Q9UTD8|ERD11_SCHPO(Protein ERD1 homolog 1 OS=Schizosaccharomyces pombe (strain 972 / ATCC 24843) OX=284812 GN=erd1 PE=3 SV=2)
104692	estExt_Genewise1Plus.C_360089	alpha/beta-Hydrolase	2048	0.623695	-0.0520815	3.22e-09	8.48e-09	0.418674	0.527993	COG5153(I:Lipid transport and metabolism); COG5153(U:Intracellular trafficking, secretion, and vesicular transport)	COG5153(Lipase which is essential for lysis of subvacuolar cytoplasm to vacuole targeted bodies and intravacuolar autophagic bodies. Involved in the lysis of intravacuolar multivesicular body (MVB) vesicles. The intravacuolar membrane disintegration by ATG15 is critical to life span extension (By similarity)); COG5153(Lipase which is essential for lysis of subvacuolar cytoplasm to vacuole targete…	PF01764.25(Lipase_3:Lipase (class 3))	sp|I1RFN8|ATG15_GIBZE(Putative lipase ATG15 OS=Gibberella zeae (strain PH-1 / ATCC MYA-4620 / FGSC 9075 / NRRL 31084) OX=229533 GN=ATG15 PE=3 SV=1)
104994	estExt_Genewise1Plus.C_410085	hypothetical protein	2202	1.30222	0.0545378	2e-72	2.02e-71	0.307076	0.41148	ENOG410XRA4(S:Function unknown)	ENOG410XRA4(Conserved hypothetical, protein)	PF00735.18(Septin:Septin)	sp|Q5EB96|SEPT1_RAT(Septin-1 OS=Rattus norvegicus OX=10116 GN=Sept1 PE=1 SV=1)
105436	estExt_Genewise1.C_1_t10338	SURF4-domain containing protein	1530	1.07968	0.556033	3.57e-114	5.03e-113	5.86436e-13	3.05396e-12	COG2259(S:Function unknown)	COG2259(doxx family)	PF02077.15(SURF4:SURF4 family)	sp|O74559|SURF4_SCHPO(Surfeit locus protein 4 homolog OS=Schizosaccharomyces pombe (strain 972 / ATCC 24843) OX=284812 GN=SPCC970.06 PE=3 SV=1)
105903	estExt_Genewise1.C_1_t30222	transport protein	3830	1.10882	0.646754	1.31e-104	1.73e-103	1.3315e-29	1.18478e-28	ENOG410XQ1D(U:Intracellular trafficking, secretion, and vesicular transport)	ENOG410XQ1D(Component of the coat protein complex II (COPII) which promotes the formation of transport vesicles from the endoplasmic reticulum (ER). The coat has two main functions, the physical deformation of the endoplasmic reticulum membrane into vesicles and the selection of cargo molecules)	PF12931.7(Sec16_C:Sec23-binding domain of Sec16); PF07304.11(SRA1:Steroid receptor RNA activator (SRA1))	sp|A4RD35|SEC31_MAGO7(Protein transport protein SEC31 OS=Magnaporthe oryzae (strain 70-15 / ATCC MYA-4617 / FGSC 8958) OX=242507 GN=SEC31 PE=3 SV=1)
106116	estExt_Genewise1.C_1_t40252	RabGAP/TBC	2726	2.00937	1.01273	3.59e-43	2.51e-42	1.12104e-35	1.13378e-34	COG5210(K:Transcription)	COG5210(DNA-dependent RNA polymerase catalyzes the transcription of DNA into RNA using the four ribonucleoside triphosphates as substrates)	PF00566.18(RabGAP-TBC:Rab-GTPase-TBC domain)	sp|P48566|GYP3_YEAST(GTPase-activating protein GYP3 OS=Saccharomyces cerevisiae (strain ATCC 204508 / S288c) OX=559292 GN=MSB3 PE=1 SV=1)
106883	estExt_Genewise1.C_2_t10425	vacuolar protein sorting-associated protein vps17	2054	0.940887	0.318096	9.89e-37	6.2e-36	2.42954e-07	8.78927e-07	COG5391(U:Intracellular trafficking, secretion, and vesicular transport)	COG5391(Involved in nuclear export, actin cytoskeleton organization and vesicular transport (By similarity))	PF09325.10(Vps5:Vps5 C terminal like); PF00787.24(PX:PX domain)	sp|Q9URW7|VPS17_SCHPO(Vacuolar protein sorting-associated protein 17 OS=Schizosaccharomyces pombe (strain 972 / ATCC 24843) OX=284812 GN=vps17 PE=3 SV=1)
106952	estExt_Genewise1.C_2_t20090	SNARE-like protein	831	0.313253	0.47251	0.0020834	0.00356796	3.26126e-13	1.72653e-12	COG5143(S:Function unknown)	COG5143(-)	PF00957.21(Synaptobrevin:Synaptobrevin); PF13774.6(Longin:Regulated-SNARE-like domain)	sp|O60073|YKT6_SCHPO(Synaptobrevin homolog ykt6 OS=Schizosaccharomyces pombe (strain 972 / ATCC 24843) OX=284812 GN=ykt6 PE=3 SV=1)
107876	estExt_Genewise1.C_3_t10406	ADP-ribosylation factor family protein	882	0.238638	0.053311	4.99e-11	1.45e-10	0.181898	0.266638	COG1100(S:Function unknown)	COG1100(peptidase')	PF00025.21(Arf:ADP-ribosylation factor family); PF08477.13(Roc:Ras of Complex, Roc, domain of DAPkinase); PF09439.10(SRPRB:Signal recognition particle receptor beta subunit); PF00503.20(G-alpha:G-protein alpha subunit); PF00071.22(Ras:Ras family); PF04670.12(Gtr1_RagA:Gtr1/RagA G protein conserved region); PF01926.23(MMR_HSR1:50S ribosome-binding GTPase)	sp|P34727|ARF_AJECA(ADP-ribosylation factor OS=Ajellomyces capsulatus OX=5037 GN=ARF PE=1 SV=3)
107919	estExt_Genewise1.C_3_t10478	Annexin	1763	-1.10738	-0.822242	5.16e-178	9.9e-177	1.46575e-49	1.86576e-48	ENOG410XPUN(S:Function unknown)	ENOG410XPUN(-)	PF00191.20(Annexin:Annexin)	sp|P20073|ANXA7_HUMAN(Annexin A7 OS=Homo sapiens OX=9606 GN=ANXA7 PE=1 SV=3)
109946	estExt_Genewise1.C_7_t10479	hypothetical protein	3837	1.09404	-0.20468	1.78e-26	8.85e-26	0.00568456	0.0123139	ENOG410XQBC(S:Function unknown)	ENOG410XQBC(vacuolar protein sorting 41 homolog (S. cerevisiae))	PF00637.20(Clathrin:Region in Clathrin and VPS); PF10366.9(Vps39_1:Vacuolar sorting protein 39 domain 1)	sp|P93231|VPS41_SOLLC(Vacuolar protein sorting-associated protein 41 homolog OS=Solanum lycopersicum OX=4081 GN=VPS41 PE=2 SV=1)
110096	estExt_Genewise1.C_7_t20342	Adaptor protein complex%2C beta subunit	2275	1.08803	0.170757	9.29e-51	7.27e-50	0.0095336	0.0197281	COG5096(T:Signal transduction mechanisms)	COG5096(Bola-like protein)	PF01602.20(Adaptin_N:Adaptin N terminal region); PF12717.7(Cnd1:non-SMC mitotic condensation complex subunit 1); PF13646.6(HEAT_2:HEAT repeats); PF02985.22(HEAT:HEAT repeat)	sp|Q10567|AP1B1_HUMAN(AP-1 complex subunit beta-1 OS=Homo sapiens OX=9606 GN=AP1B1 PE=1 SV=2)
110644	estExt_Genewise1.C_8_t20132	Metallo-dependent phosphatase	898	1.11044	0.0122727	2.97e-33	1.75e-32	0.91078	0.943403	COG0622(S:Function unknown)	COG0622(Phosphodiesterase, mj0936 family)	PF12850.7(Metallophos_2:Calcineurin-like phosphoesterase superfamily domain)	sp|Q9UTI5|VPS29_SCHPO(Vacuolar protein sorting-associated protein 29 OS=Schizosaccharomyces pombe (strain 972 / ATCC 24843) OX=284812 GN=vps29 PE=3 SV=1)
111102	estExt_Genewise1.C_9_t20225	Longevity assurance proteins LAG1/LAC1	1542	2.25504	0.946985	2.08e-46	1.52e-45	8.6802e-22	6.34993e-21	COG5058(U:Intracellular trafficking, secretion, and vesicular transport)	COG5058(ceramide synthase)	PF03798.16(TRAM_LAG1_CLN8:TLC domain); PF08390.11(TRAM1:TRAM1-like protein)	sp|W7LKY5|FUM17_GIBM7(Sphingosine N-acyltransferase-like protein FUM17 OS=Gibberella moniliformis (strain M3125 / FGSC 7600) OX=334819 GN=FUM17 PE=3 SV=1)
111503	estExt_Genewise1.C_10_t20256	Vacuolar protein sorting-associated protein 16	2588	1.4801	0.0478504	1.44e-64	1.34e-63	0.523676	0.613974	ENOG410XQ8X(U:Intracellular trafficking, secretion, and vesicular transport)	ENOG410XQ8X(vacuolar protein sorting)	PF04841.13(Vps16_N:Vps16, N-terminal region); PF04840.12(Vps16_C:Vps16, C-terminal region)	sp|Q9UT38|VPS16_SCHPO(Probable vacuolar protein sorting-associated protein 16 homolog OS=Schizosaccharomyces pombe (strain 972 / ATCC 24843) OX=284812 GN=vps16 PE=3 SV=1)
111537	estExt_Genewise1.C_10_t20313	expressed protein	825	0.961498	0.0755913	3.15e-14	1.06e-13	0.497516	0.595064	COG0316(J:Translation, ribosomal structure and biogenesis)	COG0316(Component of the eukaryotic translation initiation factor 3 (eIF-3) complex, which is involved in protein synthesis and, together with other initiation factors, stimulates binding of mRNA and methionyl-tRNAi to the 40S ribosome (By similarity))	PF01521.20(Fe-S_biosyn:Iron-sulphur cluster biosynthesis)	sp|Q60AU6|ERPA2_METCA(Iron-sulfur cluster insertion protein ErpA 2 OS=Methylococcus capsulatus (strain ATCC 33009 / NCIMB 11132 / Bath) OX=243233 GN=erpA2 PE=3 SV=1)
111767	estExt_Genewise1.C_11_t10457	hypothetical protein	4181	1.78944	0.682131	5.74e-60	5.05e-59	8.04642e-12	3.94812e-11	COG5329(S:Function unknown)	COG5329(-)	PF02383.18(Syja_N:SacI homology domain); PF03372.23(Exo_endo_phos:Endonuclease/Exonuclease/phosphatase family)	sp|O43001|SYJ1_SCHPO(Inositol-1,4,5-trisphosphate 5-phosphatase 1 OS=Schizosaccharomyces pombe (strain 972 / ATCC 24843) OX=284812 GN=syj1 PE=1 SV=1)
111843	estExt_Genewise1.C_11_t20090	hypothetical protein	1190	0.231234	0.717589	1.61e-05	3.35e-05	4.2457e-29	3.72768e-28	COG5538(U:Intracellular trafficking, secretion, and vesicular transport)	COG5538(translocation protein (Sec66))	PF09802.9(Sec66:Preprotein translocase subunit Sec66)	sp|Q9UUA4|SEC66_SCHPO(Translocation protein sec66 OS=Schizosaccharomyces pombe (strain 972 / ATCC 24843) OX=284812 GN=sec66 PE=1 SV=1)
114033	estExt_Genewise1.C_19_t10292	Beach-domain containing protein	8257	1.37575	0.13682	8.96e-66	8.42e-65	0.007137	0.0151342	ENOG410XNQC(S:Function unknown)	ENOG410XNQC(beige BEACH domain containing protein)	PF02138.18(Beach:Beige/BEACH domain); PF13385.6(Laminin_G_3:Concanavalin A-like lectin/glucanases superfamily); PF14844.6(PH_BEACH:PH domain associated with Beige/BEACH)	sp|Q7LKZ7|BPH1_SCHPO(Beige protein homolog 1 OS=Schizosaccharomyces pombe (strain 972 / ATCC 24843) OX=284812 GN=lvs1 PE=1 SV=2)
114258	estExt_Genewise1.C_200277	Zip-domain containing protein	1268	0.0255728	0.708565	0.85545	0.885062	3.7809e-09	1.56688e-08	ENOG410XQG5(P:Inorganic ion transport and metabolism)	ENOG410XQG5(Solute carrier family 39 (Zinc transporter), member 9)	PF02535.22(Zip:ZIP Zinc transporter)	sp|Q5ZIU9|S39A9_CHICK(Zinc transporter ZIP9 OS=Gallus gallus OX=9031 GN=SLC39A9 PE=2 SV=1)
114435	estExt_Genewise1.C_210167	small GTP-binding protein	1041	-0.239237	-0.283014	3.11e-11	9.1e-11	5.6872e-23	4.28927e-22	ENOG410XQN5(S:Function unknown)	ENOG410XQN5(member RAS oncogene family)	PF00071.22(Ras:Ras family); PF08477.13(Roc:Ras of Complex, Roc, domain of DAPkinase); PF00025.21(Arf:ADP-ribosylation factor family); PF01926.23(MMR_HSR1:50S ribosome-binding GTPase); PF00009.27(GTP_EFTU:Elongation factor Tu GTP binding domain); PF04670.12(Gtr1_RagA:Gtr1/RagA G protein conserved region); PF09439.10(SRPRB:Signal recognition particle receptor beta subunit)	sp|P33723|YPT1_NEUCR(GTP-binding protein ypt1 OS=Neurospora crassa (strain ATCC 24698 / 74-OR23-1A / CBS 708.71 / DSM 1257 / FGSC 987) OX=367110 GN=ypt-1 PE=3 SV=1)
115500	estExt_Genewise1.C_270375	ARM repeat-containing protein	3566	0.154307	-1.17149	4.21e-06	9.12e-06	6.46666e-265	3.64893e-263	ENOG410XQAJ(S:Function unknown)	ENOG410XQAJ(-)	PF13513.6(HEAT_EZ:HEAT-like repeat); PF02985.22(HEAT:HEAT repeat); PF12717.7(Cnd1:non-SMC mitotic condensation complex subunit 1); PF03810.19(IBN_N:Importin-beta N-terminal domain); PF12348.8(CLASP_N:CLASP N terminal); PF10363.9(RTP1_C1:Required for nuclear transport of RNA pol II C-terminus 1)	sp|O60100|IMB4_SCHPO(Probable importin subunit beta-4 OS=Schizosaccharomyces pombe (strain 972 / ATCC 24843) OX=284812 GN=kap123 PE=3 SV=1)
116265	estExt_Genewise1.C_360014	Microsomal signal peptidase 12 kDa subunit	484	0.00464164	1.00274	0.982452	0.984179	1.00034e-15	5.93028e-15	ENOG411274V(U:Intracellular trafficking, secretion, and vesicular transport)	ENOG411274V(Signal peptidase complex subunit 1 homolog (S. cerevisiae))	PF06645.13(SPC12:Microsomal signal peptidase 12 kDa subunit (SPC12))	sp|Q61CQ8|SPCS1_CAEBR(Probable signal peptidase complex subunit 1 OS=Caenorhabditis briggsae OX=6238 GN=spcs-1 PE=3 SV=1)
119955	fgenesh2_kg.16_#_82_#_gi|38353664|gb|CF933835.1|CF933835	Tom7-domain containing protein	211	1.04611	0.206836	1.97e-12	6.12e-12	0.316616	0.421275	ENOG41122H5(S:Function unknown)	ENOG41122H5(TOM7 family)	PF08038.12(Tom7:TOM7 family)	sp|O42999|TOM7_SCHPO(Mitochondrial import receptor subunit tom7 OS=Schizosaccharomyces pombe (strain 972 / ATCC 24843) OX=284812 GN=tom7 PE=3 SV=2)
120252	fgenesh2_kg.20_#_43_#_gi|30120040|gb|CB905382.1|CB905382	Tim10/DDP family zinc finger-containing protein	421	-0.18492	-0.419733	0.0149233	0.0229877	2.52618e-05	7.57527e-05	ENOG4111TUA(O:Posttranslational modification, protein turnover, chaperones)	ENOG4111TUA(mitochondrial import inner membrane translocase, subunit)	PF02953.15(zf-Tim10_DDP:Tim10/DDP family zinc finger)	sp|Q4IB65|TIM9_GIBZE(Mitochondrial import inner membrane translocase subunit TIM9 OS=Gibberella zeae (strain PH-1 / ATCC MYA-4620 / FGSC 9075 / NRRL 31084) OX=229533 GN=TIM9 PE=3 SV=1)
121146	fgenesh2_kg.37_#_16_#_gi|38356396|gb|BM076451.2|BM076451	nuclear transport factor 2 domain-containing protein	483	-0.285003	0.104438	9.2e-06	1.95e-05	0.0943518	0.152672	ENOG4111QUX(U:Intracellular trafficking, secretion, and vesicular transport)	ENOG4111QUX(nuclear transport factor)	PF02136.20(NTF2:Nuclear transport factor 2 (NTF2) domain)	sp|Q96VN3|NTF2_EMENI(Nuclear transport factor 2 OS=Emericella nidulans (strain FGSC A4 / ATCC 38163 / CBS 112.46 / NRRL 194 / M139) OX=227321 GN=ntf2 PE=3 SV=1)
121499	estExt_fgenesh2_kg.C_1_t10109	RER1 protein	1125	-0.697964	0.117715	2.5e-53	2.04e-52	0.0239016	0.0455301	COG5249(U:Intracellular trafficking, secretion, and vesicular transport)	COG5249(RER1 retention in endoplasmic reticulum 1 homolog (S. cerevisiae))	PF03248.13(Rer1:Rer1 family)	sp|O15258|RER1_HUMAN(Protein RER1 OS=Homo sapiens OX=9606 GN=RER1 PE=1 SV=1)
123411	estExt_fgenesh2_kg.C_90096	Adaptor protein complex%2C sigma subunit	603	0.665014	0.541854	5.4e-13	1.72e-12	1.55159e-10	7.05918e-10	COG5030(U:Intracellular trafficking, secretion, and vesicular transport)	COG5030(Adaptor-related protein complex)	PF01217.20(Clat_adaptor_s:Clathrin adaptor complex small chain)	sp|Q9P7N2|AP1S1_SCHPO(AP-1 complex subunit sigma-1 OS=Schizosaccharomyces pombe (strain 972 / ATCC 24843) OX=284812 GN=vas2 PE=1 SV=1)
123747	estExt_fgenesh2_kg.C_120004	succinate dehydrogenase cytochrome b small subunit	727	0.749008	0.0772905	2.37e-44	1.68e-43	0.0791988	0.13055	ENOG4111RTW(I:Lipid transport and metabolism)	ENOG4111RTW(succinate dehydrogenase)	PF05328.12(CybS:CybS, succinate dehydrogenase cytochrome B small subunit)	sp|Q7SGY6|DHSD_NEUCR(Succinate dehydrogenase [ubiquinone] cytochrome b small subunit, mitochondrial OS=Neurospora crassa (strain ATCC 24698 / 74-OR23-1A / CBS 708.71 / DSM 1257 / FGSC 987) OX=367110 GN=B18P24.060 PE=3 SV=1)
124198	estExt_fgenesh2_kg.C_160043	ERV25 protein	1028	0.291029	0.724568	5.05e-06	1.09e-05	2.44788e-16	1.48737e-15	ENOG410XTBQ(U:Intracellular trafficking, secretion, and vesicular transport)	ENOG410XTBQ(vesicle-mediated transport)	PF01105.24(EMP24_GP25L:emp24/gp25L/p24 family/GOLD)	sp|Q4HY20|TMEDA_GIBZE(Endoplasmic reticulum vesicle protein 25 OS=Gibberella zeae (strain PH-1 / ATCC MYA-4620 / FGSC 9075 / NRRL 31084) OX=229533 GN=ERV25 PE=3 SV=1)
124483	estExt_fgenesh2_kg.C_200011	putative ras GTPase Rab11	1060	0.274579	0.614597	4.36e-10	1.21e-09	1.51538e-67	2.4095e-66	COG1100(J:Translation, ribosomal structure and biogenesis)	COG1100(ribosome biogenesis protein brx1)	PF00071.22(Ras:Ras family); PF08477.13(Roc:Ras of Complex, Roc, domain of DAPkinase); PF00025.21(Arf:ADP-ribosylation factor family); PF01926.23(MMR_HSR1:50S ribosome-binding GTPase); PF00009.27(GTP_EFTU:Elongation factor Tu GTP binding domain); PF04670.12(Gtr1_RagA:Gtr1/RagA G protein conserved region); PF03193.16(RsgA_GTPase:RsgA GTPase)	sp|P22129|RB11B_DIPOM(Ras-related protein Rab-11B OS=Diplobatis ommata OX=1870830 PE=2 SV=1)
124982	estExt_fgenesh2_kg.C_270045	mitochondrial inner membrane translocase subunit	499	1.67529	-0.105128	1.68e-23	7.73e-23	0.523094	0.613369	COG5596(S:Function unknown)	COG5596(-)	PF02466.19(Tim17:Tim17/Tim22/Tim23/Pmp24 family)	sp|P59670|TIM17_NEUCR(Mitochondrial import inner membrane translocase subunit tim17 OS=Neurospora crassa (strain ATCC 24698 / 74-OR23-1A / CBS 708.71 / DSM 1257 / FGSC 987) OX=367110 GN=tim17 PE=2 SV=1)
125012	estExt_fgenesh2_kg.C_280020	hypothetical protein	919	0.292898	-0.353203	5.14e-41	3.5e-40	4.99976e-64	7.64757e-63	COG5052(K:Transcription)	COG5052(influences HLA class II expression)	PF03134.19(TB2_DP1_HVA22:TB2/DP1, HVA22 family)	sp|Q871R7|YOP1_NEUCR(Protein yop-1 OS=Neurospora crassa (strain ATCC 24698 / 74-OR23-1A / CBS 708.71 / DSM 1257 / FGSC 987) OX=367110 GN=yop-1 PE=3 SV=1)
127053	fgenesh1_pm.2_#_378	Adaptor protein complex%2C beta subunit	2148	1.72174	0.597029	6.57e-51	5.15e-50	1.06306e-15	6.28999e-15	COG5096(S:Function unknown)	COG5096(Conserved hypothetical, protein)	PF01602.20(Adaptin_N:Adaptin N terminal region); PF12717.7(Cnd1:non-SMC mitotic condensation complex subunit 1); PF13646.6(HEAT_2:HEAT repeats); PF02985.22(HEAT:HEAT repeat)	sp|Q9SUS3|APBLB_ARATH(Beta-adaptin-like protein B OS=Arabidopsis thaliana OX=3702 GN=BETAB-AD PE=1 SV=1)
127056	fgenesh1_pm.2_#_381	hypothetical protein	1062	0.366688	0.146398	0.0277064	0.0411354	0.408254	0.517461	ENOG410ZW7D(U:Intracellular trafficking, secretion, and vesicular transport)	ENOG410ZW7D(SNARE protein)	PF10496.9(Syntaxin-18_N:SNARE-complex protein Syntaxin-18 N-terminus)	sp|O94531|UFE1_SCHPO(Syntaxin ufe1 OS=Schizosaccharomyces pombe (strain 972 / ATCC 24843) OX=284812 GN=ufe1 PE=1 SV=1)
128191	fgenesh1_pm.4_#_188	expressed protein	726	0.358502	-0.816979	4.73e-08	1.16e-07	2.5954e-44	3.01353e-43	COG5171(U:Intracellular trafficking, secretion, and vesicular transport)	COG5171(ran binding protein)	PF00638.18(Ran_BP1:RanBP1 domain)	sp|Q09717|RANG_SCHPO(Ran-specific GTPase-activating protein 1 OS=Schizosaccharomyces pombe (strain 972 / ATCC 24843) OX=284812 GN=sbp1 PE=1 SV=1)
128678	fgenesh1_pm.5_#_216	hypothetical protein	2100	-0.808943	-0.306048	3.22e-30	1.77e-29	1.76601e-07	6.4826e-07	ENOG410XPSY(S:Function unknown)	ENOG410XPSY(RAB3A interacting protein)	PF06428.11(Sec2p:GDP/GTP exchange factor Sec2p)	sp|O13930|SEC2_SCHPO(Rab guanine nucleotide exchange factor sec2 OS=Schizosaccharomyces pombe (strain 972 / ATCC 24843) OX=284812 GN=sec2 PE=1 SV=1)
129091	fgenesh1_pm.6_#_225	putative clathrin assembly protein AP47	1341	0.691707	0.310479	7.8e-16	2.79e-15	9.27148e-05	0.00026158	ENOG410XPFS(U:Intracellular trafficking, secretion, and vesicular transport)	ENOG410XPFS(Adaptor-related protein complex)	PF00928.21(Adap_comp_sub:Adaptor complexes medium subunit family); PF01217.20(Clat_adaptor_s:Clathrin adaptor complex small chain)	sp|Q9HFE5|AP1M1_SCHPO(AP-1 complex subunit mu-1 OS=Schizosaccharomyces pombe (strain 972 / ATCC 24843) OX=284812 GN=apm1 PE=1 SV=1)
129208	fgenesh1_pm.6_#_342	Trs120-domain containing protein	5301	1.31961	0.540383	2.07e-34	1.25e-33	2.62212e-09	1.09896e-08	ENOG410YJME(U:Intracellular trafficking, secretion, and vesicular transport)	ENOG410YJME(hypercellular protein)	PF08626.11(TRAPPC9-Trs120:Transport protein Trs120 or TRAPPC9, TRAPP II complex subunit); PF00106.25(adh_short:short chain dehydrogenase); PF13561.6(adh_short_C2:Enoyl-(Acyl carrier protein) reductase)	sp|O14251|TR120_SCHPO(Transport protein particle subunit trs120 OS=Schizosaccharomyces pombe (strain 972 / ATCC 24843) OX=284812 GN=trs120 PE=3 SV=1)
129803	fgenesh1_pm.8_#_46	Septin-domain containing protein	1611	-0.505756	0.489271	1.2e-26	5.99e-26	3.98882e-35	3.97764e-34	COG5019(D:Cell cycle control, cell division, chromosome partitioning); COG5019(Z:Cytoskeleton)	COG5019(Cell division control protein); COG5019(Cell division control protein)	PF00735.18(Septin:Septin); PF01926.23(MMR_HSR1:50S ribosome-binding GTPase); PF00009.27(GTP_EFTU:Elongation factor Tu GTP binding domain); PF03193.16(RsgA_GTPase:RsgA GTPase); PF00005.27(ABC_tran:ABC transporter); PF04548.16(AIG1:AIG1 family); PF08477.13(Roc:Ras of Complex, Roc, domain of DAPkinase)	sp|P39826|CDC3_CANAX(Cell division control protein 3 OS=Candida albicans OX=5476 GN=CDC3 PE=3 SV=1)
130317	fgenesh1_pm.9_#_263	putative SRP receptor beta subunit	825	-1.17956	0.211165	2.5e-36	1.56e-35	0.116425	0.183013	COG2229(S:Function unknown)	COG2229(atp gtp-binding protein)	PF09439.10(SRPRB:Signal recognition particle receptor beta subunit); PF00025.21(Arf:ADP-ribosylation factor family); PF01926.23(MMR_HSR1:50S ribosome-binding GTPase); PF00009.27(GTP_EFTU:Elongation factor Tu GTP binding domain)	sp|P36057|SRPB_YEAST(Signal recognition particle receptor subunit beta OS=Saccharomyces cerevisiae (strain ATCC 204508 / S288c) OX=559292 GN=SRP102 PE=1 SV=1)
130387	fgenesh1_pm.10_#_13	Mannose 6-phosphate receptor domain-containing protein	1050	0.0513928	0.543358	0.60077	0.656748	4.76074e-08	1.82049e-07	ENOG410ZWHP(U:Intracellular trafficking, secretion, and vesicular transport)	ENOG410ZWHP(Insulin-like growth factor 2 receptor)	PF02157.15(Man-6-P_recep:Mannose-6-phosphate receptor); PF09451.10(ATG27:Autophagy-related protein 27); PF00878.18(CIMR:Cation-independent mannose-6-phosphate receptor repeat)	sp|O59745|YN29_SCHPO(Putative mannose 6-phosphate receptor-like protein C530.09c OS=Schizosaccharomyces pombe (strain 972 / ATCC 24843) OX=284812 GN=SPBC530.09c PE=3 SV=1)
130455	fgenesh1_pm.10_#_81	Xpo1-domain containing protein	3060	0.429048	-0.106175	3.61e-06	7.87e-06	0.174761	0.257482	ENOG410XZDZ(J:Translation, ribosomal structure and biogenesis)	ENOG410XZDZ(tRNA nucleus export receptor which facilitates tRNA translocation across the nuclear pore complex. Involved in pre- tRNA splicing, probably by affecting the interaction of pre-tRNA with splicing endonuclease (By similarity))	PF08389.12(Xpo1:Exportin 1-like protein)	sp|Q2H6R9|XPOT_CHAGB(Exportin-T OS=Chaetomium globosum (strain ATCC 6205 / CBS 148.51 / DSM 1962 / NBRC 6347 / NRRL 1970) OX=306901 GN=LOS1 PE=3 SV=1)
130862	fgenesh1_pm.11_#_195	hypothetical protein	1689	1.12803	0.403183	4.38e-05	8.8e-05	0.0567886	0.0981733	ENOG410XR38(S:Function unknown)	ENOG410XR38(asparagine-linked glycosylation 12, alpha-1,6-mannosyltransferase homolog (S. cerevisiae))	PF03901.17(Glyco_transf_22:Alg9-like mannosyltransferase family)	sp|Q8VDB2|ALG12_MOUSE(Dol-P-Man:Man(7)GlcNAc(2)-PP-Dol alpha-1,6-mannosyltransferase OS=Mus musculus OX=10090 GN=Alg12 PE=2 SV=2)
130879	fgenesh1_pm.11_#_212	hypothetical protein	3669	2.87447	2.32193	0.0429812	0.06183	4.56578e-05	0.000133455
130962	fgenesh1_pm.12_#_4	putative importin 11	3126	1.27164	-0.00302135	3.74e-23	1.7e-22	0.97958	0.98426	COG5657(D:Cell cycle control, cell division, chromosome partitioning)	COG5657(Maf-like protein)	PF03810.19(IBN_N:Importin-beta N-terminal domain); PF08389.12(Xpo1:Exportin 1-like protein); PF08506.10(Cse1:Cse1)	sp|Q02932|KA120_YEAST(Importin beta-like protein KAP120 OS=Saccharomyces cerevisiae (strain ATCC 204508 / S288c) OX=559292 GN=KAP120 PE=1 SV=1)
131970	fgenesh1_pm.16_#_72	Clathrin adaptor%2C mu subunit	2973	1.12525	0.1744	6.35e-45	4.57e-44	0.015274	0.0303382	ENOG410XT7B(U:Intracellular trafficking, secretion, and vesicular transport)	ENOG410XT7B(adaptor-related protein complex 3, mu)	PF00928.21(Adap_comp_sub:Adaptor complexes medium subunit family); PF00698.21(Acyl_transf_1:Acyl transferase domain)	sp|P71019|FABD_BACSU(Malonyl CoA-acyl carrier protein transacylase OS=Bacillus subtilis (strain 168) OX=224308 GN=fabD PE=3 SV=2)
134320	fgenesh1_pm.31_#_34	Clathrin adaptor%2C mu subunit	1350	0.718547	0.291844	4.17e-09	1.09e-08	0.000229496	0.000619171	ENOG410XPFS(S:Function unknown)	ENOG410XPFS(-)	PF00928.21(Adap_comp_sub:Adaptor complexes medium subunit family); PF01217.20(Clat_adaptor_s:Clathrin adaptor complex small chain)	sp|P54672|AP2M_DICDI(AP-2 complex subunit mu OS=Dictyostelium discoideum OX=44689 GN=apm2 PE=2 SV=2)
134474	fgenesh1_pm.33_#_42	putative dynamin GTPase	2811	0.694639	0.276909	1.23e-06	2.77e-06	0.0139244	0.027897	COG0699(S:Function unknown)	COG0699(RNA recognition motif. (a.k.a. RRM, RBD, or RNP domain))	PF00350.23(Dynamin_N:Dynamin family); PF01031.20(Dynamin_M:Dynamin central region); PF02212.18(GED:Dynamin GTPase effector domain)	sp|P09922|MX1_MOUSE(Interferon-induced GTP-binding protein Mx1 OS=Mus musculus OX=10090 GN=Mx1 PE=1 SV=1)
134979	fgenesh1_pm.45_#_1	Vps52/Sac2 family protein	1995	0.834158	0.338097	9.27e-19	3.65e-18	0.000270356	0.000723922	ENOG410XNZ1(U:Intracellular trafficking, secretion, and vesicular transport)	ENOG410XNZ1(vacuolar protein sorting 52 homolog (S. cerevisiae))	PF04129.12(Vps52:Vps52 / Sac2 family); PF09763.9(Sec3_C:Exocyst complex component Sec3)	sp|Q94KD3|VP52A_ARATH(Vacuolar protein sorting-associated protein 52 A OS=Arabidopsis thaliana OX=3702 GN=VPS52 PE=1 SV=1)
135036	fgenesh1_pm.47_#_2	P-loop containing nucleoside triphosphate hydrolase protein	2094	-2.87915	1.16746	2.87e-07	6.71e-07	0.022144	0.0425058	COG0699(S:Function unknown)	COG0699(IBR domain)	PF01031.20(Dynamin_M:Dynamin central region); PF00350.23(Dynamin_N:Dynamin family); PF01926.23(MMR_HSR1:50S ribosome-binding GTPase)	sp|Q6PW23|MX_EPICO(Interferon-induced GTP-binding protein Mx OS=Epinephelus coioides OX=94232 GN=mx PE=2 SV=1)
135457	estExt_fgenesh1_pm.C_1_t20003	hypothetical protein	4094	1.13589	0.116767	4.37e-116	6.22e-115	0.00130162	0.0031384	ENOG410XTDR(S:Function unknown)	ENOG410XTDR(Zinc finger, HIT-type containing 6)	PF12763.7(EF-hand_4:Cytoskeletal-regulatory complex EF hand); PF00627.31(UBA:UBA/TS-N domain)	sp|Q9HGL2|YHLA_SCHPO(Uncharacterized calcium-binding protein C800.10c OS=Schizosaccharomyces pombe (strain 972 / ATCC 24843) OX=284812 GN=SPBC800.10c PE=4 SV=1)
135956	estExt_fgenesh1_pm.C_2_t10466	hypothetical protein	1110	0.508491	0.512552	2.51e-29	1.35e-28	1.14455e-12	5.85497e-12	ENOG410YH8V(U:Intracellular trafficking, secretion, and vesicular transport)	ENOG410YH8V(lectin mannose-binding)	PF03388.13(Lectin_leg-like:Legume-like lectin family); PF00139.19(Lectin_legB:Legume lectin domain)	sp|O94401|YQF8_SCHPO(L-type lectin-like domain-containing protein C126.08c OS=Schizosaccharomyces pombe (strain 972 / ATCC 24843) OX=284812 GN=SPCC126.08c PE=3 SV=1)
136120	estExt_fgenesh1_pm.C_3_t10057	TBC-domain containing protein	1602	0.441717	0.146514	0.00199284	0.00341802	0.228744	0.324463	COG5210(U:Intracellular trafficking, secretion, and vesicular transport)	COG5210(Tho complex)	PF00566.18(RabGAP-TBC:Rab-GTPase-TBC domain)	sp|P36618|CDC16_SCHPO(Cell division control protein 16 OS=Schizosaccharomyces pombe (strain 972 / ATCC 24843) OX=284812 GN=cdc16 PE=1 SV=1)
136136	estExt_fgenesh1_pm.C_3_t10082	GTP-binding nuclear protein GSP1/Ran	1048	-0.100801	-0.364852	4.77e-05	9.54e-05	1.35799e-54	1.859e-53	ENOG410XNRS(S:Function unknown)	ENOG410XNRS(GTP-binding nuclear protein)	PF00071.22(Ras:Ras family); PF08477.13(Roc:Ras of Complex, Roc, domain of DAPkinase); PF00025.21(Arf:ADP-ribosylation factor family); PF01926.23(MMR_HSR1:50S ribosome-binding GTPase); PF00910.22(RNA_helicase:RNA helicase)	sp|Q7RVL0|GSP1_NEUCR(GTP-binding nuclear protein GSP1/Ran OS=Neurospora crassa (strain ATCC 24698 / 74-OR23-1A / CBS 708.71 / DSM 1257 / FGSC 987) OX=367110 GN=ran PE=2 SV=1)
136368	estExt_fgenesh1_pm.C_40093	hypothetical protein	3463	0.438618	0.310923	1.54e-14	5.25e-14	1.00702e-08	4.0641e-08	COG0200(J:Translation, ribosomal structure and biogenesis); COG5391(J:Translation, ribosomal structure and biogenesis)	COG0200(Binds to the 23S rRNA (By similarity)); COG5391(Binds to the 23S rRNA (By similarity))	PF00828.19(Ribosomal_L27A:Ribosomal proteins 50S-L15, 50S-L18e, 60S-L27A); PF00787.24(PX:PX domain)	sp|Q7SB97|MVP1_NEUCR(Sorting nexin mvp1 OS=Neurospora crassa (strain ATCC 24698 / 74-OR23-1A / CBS 708.71 / DSM 1257 / FGSC 987) OX=367110 GN=vsp-1 PE=3 SV=3)
136503	estExt_fgenesh1_pm.C_40385	hypothetical protein	3353	-1.46747	-0.351001	9.95e-172	1.87e-170	1.98927e-08	7.82684e-08	ENOG410YZRQ(S:Function unknown); COG1053(S:Function unknown); COG5391(S:Function unknown)	ENOG410YZRQ((PX) domain-containing protein); COG1053((PX) domain-containing protein); COG5391((PX) domain-containing protein)	PF12825.7(DUF3818:Domain of unknown function in PX-proteins (DUF3818)); PF12828.7(PXB:PX-associated); PF00787.24(PX:PX domain)	sp|Q9Y7N9|YCKC_SCHPO(PX domain-containing protein C1450.12 OS=Schizosaccharomyces pombe (strain 972 / ATCC 24843) OX=284812 GN=SPCC1450.12 PE=1 SV=1)
136963	estExt_fgenesh1_pm.C_70187	VID27-domain containing protein	2427	-0.0254941	-0.112241	0.878428	0.906162	0.539636	0.630052	COG5167(U:Intracellular trafficking, secretion, and vesicular transport)	COG5167(vacuolar import and degradation protein)	PF08553.10(VID27:VID27 C-terminal WD40-like domain); PF17748.1(VID27_N:VID27 N-terminal region); PF17747.1(VID27_PH:VID27 PH-like domain)	sp|Q1MTR3|VID27_SCHPO(Vacuolar import and degradation protein 27 OS=Schizosaccharomyces pombe (strain 972 / ATCC 24843) OX=284812 GN=vid27 PE=1 SV=1)
136978	estExt_fgenesh1_pm.C_70221	hypothetical protein	3129	0.722524	0.14292	5.02e-37	3.17e-36	0.0189231	0.0368661	COG5028(U:Intracellular trafficking, secretion, and vesicular transport)	COG5028(SEC24 family, member)	PF04811.15(Sec23_trunk:Sec23/Sec24 trunk domain); PF04815.15(Sec23_helical:Sec23/Sec24 helical domain); PF08033.12(Sec23_BS:Sec23/Sec24 beta-sandwich domain); PF04810.15(zf-Sec23_Sec24:Sec23/Sec24 zinc finger); PF00626.22(Gelsolin:Gelsolin repeat)	sp|Q9USS7|YNB3_SCHPO(Uncharacterized protein C4.03c OS=Schizosaccharomyces pombe (strain 972 / ATCC 24843) OX=284812 GN=SPBC4.03c PE=2 SV=1)
137634	estExt_fgenesh1_pm.C_110178	Exocyst complex component Sec10	2535	-0.45455	0.0101242	1.5e-08	3.78e-08	0.923842	0.952455	ENOG410XSQQ(U:Intracellular trafficking, secretion, and vesicular transport)	ENOG410XSQQ(Exocyst complex component)	PF07393.11(Sec10:Exocyst complex component Sec10)	sp|Q06245|SEC10_YEAST(Exocyst complex component SEC10 OS=Saccharomyces cerevisiae (strain ATCC 204508 / S288c) OX=559292 GN=SEC10 PE=1 SV=1)
138052	estExt_fgenesh1_pm.C_140225	Septin	1284	-0.0433875	0.679043	0.491582	0.558621	3.15184e-31	2.91089e-30	COG5019(S:Function unknown)	COG5019(Membrane)	PF00735.18(Septin:Septin); PF01926.23(MMR_HSR1:50S ribosome-binding GTPase)	sp|P48008|SPN3_SCHPO(Septin homolog spn3 OS=Schizosaccharomyces pombe (strain 972 / ATCC 24843) OX=284812 GN=spn3 PE=1 SV=3)
138075	estExt_fgenesh1_pm.C_150032	Annexin	1612	0.822522	0.125084	7.43e-19	2.94e-18	0.095505	0.154376	ENOG410ZKAM(S:Function unknown)	ENOG410ZKAM(annexin ANXC4)	PF00191.20(Annexin:Annexin)	sp|Q29471|ANX13_CANLF(Annexin A13 OS=Canis lupus familiaris OX=9615 GN=ANXA13 PE=1 SV=2)
138111	estExt_fgenesh1_pm.C_150121	hypothetical protein	3519	1.15574	0.77212	4.44e-64	4.09e-63	4.68128e-33	4.47989e-32	ENOG410XPH3(I:Lipid transport and metabolism)	ENOG410XPH3(phosphatidylinositol 4-kinase)	PF00454.27(PI3_PI4_kinase:Phosphatidylinositol 3- and 4-kinase); PF11522.8(Pik1:Yeast phosphatidylinositol-4-OH kinase Pik1)	sp|Q10366|PIK1_SCHPO(Phosphatidylinositol 4-kinase pik1 OS=Schizosaccharomyces pombe (strain 972 / ATCC 24843) OX=284812 GN=pik1 PE=1 SV=1)
138657	estExt_fgenesh1_pm.C_210098	hypothetical protein	902	0.263673	-0.125502	0.00230278	0.00391644	0.0631942	0.107283	COG5491(S:Function unknown)	COG5491(-)	PF03357.21(Snf7:Snf7)	sp|O14296|VPS24_SCHPO(Vacuolar protein sorting-associated protein 24 OS=Schizosaccharomyces pombe (strain 972 / ATCC 24843) OX=284812 GN=vps24 PE=3 SV=1)
138710	estExt_fgenesh1_pm.C_220053	golgi GDP-mannose transporter	1713	-0.247875	0.51132	3.69e-05	7.44e-05	5.11246e-22	3.76678e-21	COG5070(U:Intracellular trafficking, secretion, and vesicular transport)	COG5070(Solute carrier family 35)	PF08449.11(UAA:UAA transporter family)	sp|A4RM13|GMT_MAGO7(GDP-mannose transporter OS=Magnaporthe oryzae (strain 70-15 / ATCC MYA-4617 / FGSC 8958) OX=242507 GN=VRG4 PE=3 SV=1)
138886	estExt_fgenesh1_pm.C_250041	transporter ATM1	2450	1.05753	-0.0467311	5.34e-53	4.33e-52	0.507414	0.605651	COG5265(S:Function unknown)	COG5265(Conserved hypothetical, protein)	PF00664.23(ABC_membrane:ABC transporter transmembrane region); PF00005.27(ABC_tran:ABC transporter); PF02463.19(SMC_N:RecF/RecN/SMC N terminal domain); PF13191.6(AAA_16:AAA ATPase domain); PF13304.6(AAA_21:AAA domain, putative AbiEii toxin, Type IV TA system)	sp|Q4HVU7|ATM1_GIBZE(Iron-sulfur clusters transporter ATM1, mitochondrial OS=Gibberella zeae (strain PH-1 / ATCC MYA-4620 / FGSC 9075 / NRRL 31084) OX=229533 GN=ATM1 PE=3 SV=1)
139046	estExt_fgenesh1_pm.C_270112	mitochondrial inner membrane translocase subunit TIM44	1701	0.651339	-0.295027	6.69e-25	3.19e-24	0.000181691	0.000497594	ENOG410Y5IK(O:Posttranslational modification, protein turnover, chaperones)	ENOG410Y5IK(Translocase of inner mitochondrial membrane 44 homolog (Yeast))	PF04280.15(Tim44:Tim44-like domain)	sp|O60084|TIM44_SCHPO(Mitochondrial import inner membrane translocase subunit tim44 OS=Schizosaccharomyces pombe (strain 972 / ATCC 24843) OX=284812 GN=tim44 PE=3 SV=1)
139119	estExt_fgenesh1_pm.C_290006	peroxisome targeting signal type 2 receptor	1236	1.41702	0.253106	1.7e-09	4.57e-09	0.151725	0.227895	ENOG410XNVU(S:Function unknown)	ENOG410XNVU(Peroxisomal targeting signal)	PF00400.32(WD40:WD domain, G-beta repeat)	sp|P39108|PEX7_YEAST(Peroxisomal targeting signal 2 receptor OS=Saccharomyces cerevisiae (strain ATCC 204508 / S288c) OX=559292 GN=PEX7 PE=1 SV=1)
139361	estExt_fgenesh1_pm.C_360042	putative lectin family integral membrane protein	1536	0.616598	1.1511	3e-23	1.37e-22	1.3085e-25	1.0557e-24	ENOG4111FM6(U:Intracellular trafficking, secretion, and vesicular transport)	ENOG4111FM6(Lectin family integral membrane protein)	PF03388.13(Lectin_leg-like:Legume-like lectin family)	sp|P43555|EMP47_YEAST(Protein EMP47 OS=Saccharomyces cerevisiae (strain ATCC 204508 / S288c) OX=559292 GN=EMP47 PE=1 SV=1)
139697	estExt_fgenesh1_pg.C_1_t10249	Sec7-domain containing protein	5610	0.546736	0.494444	1.39e-13	4.54e-13	1.16091e-12	5.93537e-12	COG5307(S:Function unknown)	COG5307(conserved hypothetical protein)	PF01369.20(Sec7:Sec7 domain); PF12783.7(Sec7_N:Guanine nucleotide exchange factor in Golgi transport N-terminal); PF09324.10(DUF1981:Domain of unknown function (DUF1981)); PF16213.5(DCB:Dimerisation and cyclophilin-binding domain of Mon2)	sp|P11075|SEC7_YEAST(Protein transport protein SEC7 OS=Saccharomyces cerevisiae (strain ATCC 204508 / S288c) OX=559292 GN=SEC7 PE=1 SV=2)
139867	estExt_fgenesh1_pg.C_1_t20130	ARM repeat-containing protein	3390	0.939343	-0.449928	6.89e-58	5.91e-57	4.339e-29	3.80238e-28	ENOG410XQAJ(U:Intracellular trafficking, secretion, and vesicular transport)	ENOG410XQAJ(Importin)	PF18808.1(Importin_rep_4:Importin repeat); PF18816.1(Importin_rep_5:Importin repeat); PF13513.6(HEAT_EZ:HEAT-like repeat); PF02985.22(HEAT:HEAT repeat); PF13646.6(HEAT_2:HEAT repeats); PF18829.1(Importin_rep_6:Importin repeat 6); PF12755.7(Vac14_Fab1_bd:Vacuolar 14 Fab1-binding region); PF08167.12(RIX1:rRNA processing/ribosome biogenesis); PF12460.8(MMS19_C:RNAPII transcription regulator C-termin…	sp|O74476|IMB3_SCHPO(Importin subunit beta-3 OS=Schizosaccharomyces pombe (strain 972 / ATCC 24843) OX=284812 GN=sal3 PE=3 SV=1)
139928	estExt_fgenesh1_pg.C_1_t20228	t-SNARE	1158	-1.97369	0.0430393	1.01e-90	1.21e-89	0.68344	0.755622	COG5074(U:Intracellular trafficking, secretion, and vesicular transport)	COG5074(SYNtaxin)	PF00804.25(Syntaxin:Syntaxin); PF05739.19(SNARE:SNARE domain)	sp|Q9USH7|PSY1_SCHPO(Syntaxin-like protein psy1 OS=Schizosaccharomyces pombe (strain 972 / ATCC 24843) OX=284812 GN=psy1 PE=3 SV=1)
140061	estExt_fgenesh1_pg.C_2_t10052	Ras-domain containing protein	764	0.581774	0.931388	7.44e-09	1.91e-08	7.04344e-34	6.87553e-33	ENOG410XPBI(S:Function unknown)	ENOG410XPBI(member RAS oncogene family)	PF00071.22(Ras:Ras family); PF08477.13(Roc:Ras of Complex, Roc, domain of DAPkinase); PF00025.21(Arf:ADP-ribosylation factor family); PF00009.27(GTP_EFTU:Elongation factor Tu GTP binding domain); PF09439.10(SRPRB:Signal recognition particle receptor beta subunit); PF01926.23(MMR_HSR1:50S ribosome-binding GTPase); PF04670.12(Gtr1_RagA:Gtr1/RagA G protein conserved region); PF03193.16(RsgA_GTPase:R…	sp|A6QR46|RAB6B_BOVIN(Ras-related protein Rab-6B OS=Bos taurus OX=9913 GN=RAB6B PE=2 SV=1)
[truncated: 24 more rows]
